# Supplementary material for: Extremotolerant Fungi in Resinous Soils: A Unique Diversity of Generalist and Specialized Hydrocarbon Degraders
Source: Research Square preprint supplement (doi:10.21203/rs.3.rs-8530099/v1), 2026-02-10
Supplement: Supplementary file 1 [file 010f5249db36bedc14fce476.xlsx]

## Sheet: Table_S10
OTUs	Type|Abund	RS.I	RS.II	RS.III	FS.I	FS.II	Accession Number	SH	E value	Max score	Total score	Query from	Query to	Hit from	Hit to	Identity	Positive	Similarity[%]	Coverage[%]	Query length	kingdom	phylum	class	order	family	genus	species
OTU0001	MOSTABUND | n=28641/16982	9479	7206	11955	0	1	MT872624	SH0912804.10FU	6.85844e-046	187.033	206	1	150	578	729	134	134	89.3	100	150	k__Fungi	p__Ascomycota	c__Eurotiomycetes	o__Eurotiomycetes_ord_Incertae_sedis	f__Eurotiomycetes_fam_Incertae_sedis	g__Eurotiomycetes_gen_Incertae_sedis	s__Eurotiomycetes_sp
OTU0002	MOSTABUND | n=18658/14184	1	4	0	11366	7287	OR965240	SH0939544.10FU	7.04812e-078	293.432	324	1	162	346	507	162	162	100	100	162	k__Fungi	p__Ascomycota	c__Eurotiomycetes	o__Eurotiales	f__Aspergillaceae	g__Penicillium	s__Penicillium_sp
OTU0003	MOSTABUND | n=14618/7716	4012	3376	7230	0	0	PP115452	SH0911881.10FU	1.99354e-105	385.404	426	1	213	308	520	213	213	100	100	213	k__Fungi	p__Basidiomycota	c__Microbotryomycetes	o__Sporidiobolales	f__Sporidiobolaceae	g__Sporobolomyces	s__Sporobolomyces_salmonicolor
OTU0004	MOSTABUND | n=8385/4699	2530	3245	2610	0	0	EU030275	SH0828639.10FU	5.45933e-073	277.202	306	1	163	334	496	159	159	97.5	100	163	k__Fungi	p__Ascomycota	c__Eurotiomycetes	o__Chaetothyriales	f__Herpotrichiellaceae	g__Sorocybe	s__Sorocybe_resinae
OTU0005	MOSTABUND | n=6149/2796	2526	1295	2328	0	0	MN071391	SH1043354.10FU	2.72058e-110	401.634	444	1	222	297	518	222	222	100	100	222	k__Fungi	p__Fungi_phy_Incertae_sedis	c__Fungi_cls_Incertae_sedis	o__Fungi_ord_Incertae_sedis	f__Fungi_fam_Incertae_sedis	g__Fungi_gen_Incertae_sedis	s__Fungi_sp
OTU0006	MOSTABUND | n=5419/2646	2090	1136	2193	0	0	MW710094	SH0733979.10FU	2.54583e-117	425.078	470	1	235	324	558	235	235	100	100	235	k__Fungi	p__Basidiomycota	c__Microbotryomycetes	o__Microbotryomycetes_ord_Incertae_sedis	f__Colacogloeaceae	g__Colacogloea	s__Colacogloea_philyla
OTU0007	MOSTABUND | n=5407/3049	1207	370	3830	0	0	FJ235127	SH0892767.10FU	3.68562e-095	351.14	388	1	194	407	600	194	194	100	100	194	k__Fungi	p__Ascomycota	c__Saccharomycetes	o__Saccharomycetales	f__Saccharomycetales_fam_Incertae_sedis	g__Candida	s__Candida_keroseneae
OTU0008	MOSTABUND | n=5192/4666	10	6	12	2531	2633	OR803396	SH0939434.10FU	8.45725e-077	289.825	320	1	160	362	521	160	160	100	100	160	k__Fungi	p__Ascomycota	c__Eurotiomycetes	o__Eurotiales	f__Aspergillaceae	g__Penicillium	s__Penicillium_sp
OTU0009	MOSTABUND | n=4594/3080	327	196	340	3724	7	MK782435	SH0905449.10FU	1.69495e-079	298.842	330	1	165	771	935	165	165	100	100	165	k__Fungi	p__Ascomycota	c__Leotiomycetes	o__Helotiales	f__Mollisiaceae	g__Phialocephala	s__Phialocephala_fluminis
OTU0010	MOSTABUND | n=4553/2512	1352	1051	2150	0	0	OR069551	SH0767731.10FU	2.0345e-078	295.235	326	1	163	331	493	163	163	100	100	163	k__Fungi	p__Ascomycota	c__Eurotiomycetes	o__Eurotiales	f__Aspergillaceae	g__Penicillium	s__Penicillium_corylophilum
OTU0011	MOSTABUND | n=4518/1402	1614	1114	1789	1	0	MH188916	SH0926074.10FU	3.8152e-115	417.864	462	1	237	347	584	236	236	99.6	100	237	k__Fungi	p__Basidiomycota	c__Exobasidiomycetes	o__Exobasidiales	f__Exobasidiales_fam_Incertae_sedis	g__Guomyces	s__Guomyces_nicotianae
OTU0012	MOSTABUND | n=4424/3075	104	72	119	1598	2531	PP034030	SH0940222.10FU	1.41176e-080	302.449	334	1	167	250	416	167	167	100	100	167	k__Fungi	p__Ascomycota	c__Eurotiomycetes	o__Eurotiales	f__Aspergillaceae	g__Penicillium	s__Penicillium_roseopurpureum
OTU0013	MOSTABUND | n=4363/2460	1511	971	1839	42	0	OR905858	SH0887078.10FU	1.27856e-094	349.336	386	1	193	394	586	193	193	100	100	193	k__Fungi	p__Ascomycota	c__Saccharomycetes	o__Saccharomycetales	f__Debaryomycetaceae	g__Debaryomyces	s__Debaryomyces_hansenii
OTU0014	MOSTABUND | n=3709/3440	0	0	0	1216	2493	KJ406980	SH0874524.10FU	4.21375e-074	280.808	310	1	155	332	486	155	155	100	100	155	k__Fungi	p__Ascomycota	c__Sordariomycetes	o__Sordariales	f__Sordariales_fam_Incertae_sedis	g__Sordariales_gen_Incertae_sedis	s__Sordariales_sp
OTU0015	MOSTABUND | n=3686/1780	1237	855	1594	0	0	MT813950	SH0950131.10FU	9.57606e-070	266.382	294	1	159	217	374	155	155	97.5	100	159	k__Fungi	p__Ascomycota	c__Xylonomycetes	o__Symbiotaphrinales	f__Symbiotaphrinaceae	g__Symbiotaphrina	s__Symbiotaphrina_microtheca
OTU0016	MOSTABUND | n=3011/1375	681	354	626	966	384	OR793058	SH0767731.10FU	8.45725e-077	289.825	320	1	160	362	521	160	160	100	100	160	k__Fungi	p__Ascomycota	c__Eurotiomycetes	o__Eurotiales	f__Aspergillaceae	g__Penicillium	s__Penicillium_fundyense
OTU0017	MOSTABUND | n=2510/768	894	456	1155	5	0	UDB03608770	SH1012176.10FU	3.60202e-068	260.971	288	1	144	317	460	144	144	100	100	144	k__Fungi	p__Ascomycota	c__Leotiomycetes	o__Helotiales	f__Helotiales_fam_Incertae_sedis	g__Infundichalara	s__Infundichalara_sp
OTU0018	MOSTABUND | n=2432/1083	795	567	1070	0	0	MT872624	SH0912804.10FU	9.06042e-070	266.382	294	1	152	578	729	150	150	98.7	100	152	k__Fungi	p__Ascomycota	c__Eurotiomycetes	o__Eurotiomycetes_ord_Incertae_sedis	f__Eurotiomycetes_fam_Incertae_sedis	g__Eurotiomycetes_gen_Incertae_sedis	s__Eurotiomycetes_sp
OTU0019	MOSTABUND | n=2232/332	808	603	821	0	0	GU062229	SH0926075.10FU	1.37251e-127	459.342	508	1	254	308	561	254	254	100	98.4	258	k__Fungi	p__Basidiomycota	c__Basidiomycota_cls_Incertae_sedis	o__Basidiomycota_ord_Incertae_sedis	f__Basidiomycota_fam_Incertae_sedis	g__Basidiomycota_gen_Incertae_sedis	s__Basidiomycota_sp
OTU0020	MOSTABUND | n=2125/1208	491	825	808	1	0
OTU0021	MOSTABUND | n=2003/404	695	508	799	0	1	OR387067	SH0974819.10FU	5.89884e-106	387.207	428	1	219	363	580	218	218	99.5	100	219	k__Fungi	p__Ascomycota	c__Eurotiomycetes	o__Chaetothyriales	f__Herpotrichiellaceae	g__Exophiala	s__Exophiala_dermatitidis
OTU0022	MOSTABUND | n=1940/929	729	524	687	0	0	KT265804	SH0733984.10FU	5.5802e-113	410.651	454	1	232	883	1113	231	231	99.6	99.1	234	k__Fungi	p__Basidiomycota	c__Microbotryomycetes	o__Sporidiobolales	f__Sporidiobolaceae	g__Rhodotorula	s__Rhodotorula_sp
OTU0023	MOSTABUND | n=1938/1691	65	22	82	1237	532	PP151174	SH0962330.10FU	2.51144e-070	268.185	296	1	148	359	506	148	148	100	100	148	k__Fungi	p__Ascomycota	c__Dothideomycetes	o__Cladosporiales	f__Cladosporiaceae	g__Cladosporium	s__Cladosporium_cladosporioides
OTU0024	MOSTABUND | n=1896/1664	48	17	42	1345	444	UDB01377483	SH1043674.10FU	5.76101e-020	100.472	110	4	89	265	356	79	79	91.9	72.9	118	k__Fungi	p__Ascomycota	c__Ascomycota_cls_Incertae_sedis	o__Ascomycota_ord_Incertae_sedis	f__Ascomycota_fam_Incertae_sedis	g__Ascomycota_gen_Incertae_sedis	s__Ascomycota_sp
OTU0025	MOSTABUND | n=1541/1405	0	0	0	536	1005	MG925394	SH0764811.10FU	1.62749e-086	322.286	356	1	178	215	392	178	178	100	100	178	k__Fungi	p__Ascomycota	c__Pezizomycetes	o__Pezizales	f__Pezizaceae	g__Ruhlandiella	s__Ruhlandiella_berolinensis
OTU0026	MOSTABUND | n=1386/812	508	279	599	0	0	OQ383503	SH0966706.10FU	7.25585e-071	269.988	298	1	149	312	460	149	149	100	100	149	k__Fungi	p__Ascomycota	c__Leotiomycetes	o__Leotiales	f__Tympanidaceae	g__Pragmopora	s__Pragmopora_sp
OTU0027	MOSTABUND | n=1316/1221	0	0	0	326	990	OD916581	SH0963782.10FU	3.00814e-069	264.578	292	1	146	311	456	146	146	100	100	146	k__Fungi	p__Ascomycota	c__Leotiomycetes	o__Thelebolales	f__Thelebolales_fam_Incertae_sedis	g__Pseudogeomyces	s__Pseudogeomyces_hebridensis
OTU0028	MOSTABUND | n=1302/1184	0	0	0	224	1078	OR680529	SH0963782.10FU	3.00814e-069	264.578	292	1	146	347	492	146	146	100	100	146	k__Fungi	p__Ascomycota	c__Leotiomycetes	o__Thelebolales	f__Pseudeurotiaceae	g__Pseudogymnoascus	s__Pseudogymnoascus_sp
OTU0029	MOSTABUND | n=1125/426	0	0	1	447	677	PP151204	SH0940202.10FU	1.69495e-079	298.842	330	1	165	392	556	165	165	100	100	165	k__Fungi	p__Ascomycota	c__Eurotiomycetes	o__Eurotiales	f__Aspergillaceae	g__Penicillium	s__Penicillium_sp
OTU0030	MOSTABUND | n=965/497	141	72	126	503	123	KU580845	SH1015287.10FU	5.34586e-066	253.758	280	1	144	358	502	144	144	100	100	144	k__Fungi	p__Fungi_phy_Incertae_sedis	c__Fungi_cls_Incertae_sedis	o__Fungi_ord_Incertae_sedis	f__Fungi_fam_Incertae_sedis	g__Fungi_gen_Incertae_sedis	s__Fungi_sp
OTU0031	MOSTABUND | n=951/836	7	0	4	437	503	OR810007	SH0939434.10FU	8.45725e-077	289.825	320	1	160	301	460	160	160	100	100	160	k__Fungi	p__Ascomycota	c__Eurotiomycetes	o__Eurotiales	f__Aspergillaceae	g__Penicillium	s__Penicillium_bialowiezense
OTU0032	MOSTABUND | n=924/317	510	151	263	0	0	OM337540	SH0924980.10FU	2.18278e-071	271.792	300	1	153	470	622	152	152	99.3	98.7	155	k__Fungi	p__Ascomycota	c__Dothideomycetes	o__Mytilinidiales	f__Mytilinidiaceae	g__Lophium	s__Lophium_mytilinum
OTU0033	MOSTABUND | n=917/542	298	262	357	0	0	OM337573	SH0849718.10FU	1.5758e-073	279.005	308	1	164	538	700	161	161	98.2	100	164	k__Fungi	p__Ascomycota	c__Dothideomycetes	o__Mytilinidiales	f__Mytilinidiaceae	g__Mytilinidion	s__Mytilinidion_resinicola
OTU0034	MOSTABUND | n=883/294	213	129	541	0	0	MT809296	SH0737869.10FU	1.74907e-072	275.398	304	1	152	352	503	152	152	100	100	152	k__Fungi	p__Ascomycota	c__Sareomycetes	o__Sareales	f__Sareaceae	g__Sarea	s__Sarea_sp
OTU0035	MOSTABUND | n=868/756	0	0	0	471	397	OK584616	SH0974650.10FU	1.45907e-073	279.005	308	1	154	627	780	154	154	100	100	154	k__Fungi	p__Ascomycota	c__Eurotiomycetes	o__Eurotiales	f__Trichocomaceae	g__Sagenomella	s__Sagenomella_griseoviridis
OTU0036	MOSTABUND | n=833/752	0	0	0	197	636	PP156747	SH0901200.10FU	1.69495e-079	298.842	330	1	165	373	537	165	165	100	100	165	k__Fungi	p__Ascomycota	c__Eurotiomycetes	o__Eurotiales	f__Penicillaginaceae	g__Penicillago	s__Penicillago_nodositata
OTU0037	MOSTABUND | n=827/646	0	0	0	358	469	OP315718	SH0990466.10FU	7.04812e-078	293.432	324	1	162	386	547	162	162	100	100	162	k__Fungi	p__Ascomycota	c__Sordariomycetes	o__Hypocreales	f__Bionectriaceae	g__Acremonium	s__Acremonium_alternatum
OTU0038	MOSTABUND | n=792/517	258	170	364	0	0	EF434047	SH0868844.10FU	1.44308e-067	259.168	286	1	161	433	593	154	154	95.7	100	161	k__Fungi	p__Ascomycota	c__Dothideomycetes	o__Dothideomycetes_ord_Incertae_sedis	f__Dothideomycetes_fam_Incertae_sedis	g__Dothideomycetes_gen_Incertae_sedis	s__Dothideomycetes_sp
OTU0039	MOSTABUND | n=762/640	0	0	0	286	476	LC639281	SH0946103.10FU	5.15992e-066	253.758	280	1	140	351	490	140	140	100	100	140	k__Fungi	p__Ascomycota	c__Leotiomycetes	o__Helotiales	f__Myxotrichaceae	g__Oidiodendron	s__Oidiodendron_flavum
OTU0040	MOSTABUND | n=731/431	445	126	160	0	0	UDB07546800	SH0840188.10FU	3.17127e-032	141.949	156	1	179	299	477	141	141	78.8	100	179	k__Fungi	p__Basidiomycota	c__Microbotryomycetes	o__Sporidiobolales	f__Sporidiobolaceae	g__Sporidiobolaceae_gen_Incertae_sedis	s__Sporidiobolaceae_sp
OTU0041	MOSTABUND | n=659/399	45	36	578	0	0	OP856539	SH0970687.10FU	2.42707e-059	232.118	256	1	173	361	535	158	158	91.3	91.1	190	k__Fungi	p__Ascomycota	c__Sordariomycetes	o__Microascales	f__Microascaceae	g__Scedosporium	s__Scedosporium_sp
OTU0042	MOSTABUND | n=488/433	0	0	0	124	364	UDB03568216	SH0989883.10FU	5.64238e-086	320.483	354	1	177	294	470	177	177	100	100	177	k__Fungi	p__Ascomycota	c__Sordariomycetes	o__Hypocreales	f__Hypocreales_fam_Incertae_sedis	g__Hypocreales_gen_Incertae_sedis	s__Hypocreales_sp
OTU0043	MOSTABUND | n=487/241	236	92	159	0	0	OQ718080	SH0738016.10FU	2.61696e-070	268.185	296	1	153	373	525	151	151	98.7	100	153	k__Fungi	p__Ascomycota	c__Sareomycetes	o__Sareales	f__Sareaceae	g__Sarea	s__Sarea_coeloplata
OTU0044	MOSTABUND | n=476/419	0	0	0	204	272	KU581278	SH0939769.10FU	1.01457e-075	286.219	316	1	158	376	533	158	158	100	100	158	k__Fungi	p__Ascomycota	c__Eurotiomycetes	o__Eurotiales	f__Aspergillaceae	g__Penicillium	s__Penicillium_sp
OTU0045	MOSTABUND | n=469/210	249	69	150	1	0	OR752067	SH0940075.10FU	1.69495e-079	298.842	330	1	165	364	528	165	165	100	100	165	k__Fungi	p__Ascomycota	c__Eurotiomycetes	o__Eurotiales	f__Aspergillaceae	g__Aspergillus	s__Aspergillus_fumigatus
OTU0046	MOSTABUND | n=466/253	127	98	147	19	75	UDB01441599	SH0878054.10FU	1.41176e-080	302.449	334	1	167	343	509	167	167	100	100	167	k__Fungi	p__Ascomycota	c__Eurotiomycetes	o__Eurotiales	f__Aspergillaceae	g__Aspergillus	s__Aspergillus_sp
OTU0047	MOSTABUND | n=446/265	121	147	178	0	0	UDB02025080	SH0950063.10FU	6.71759e-052	206.87	228	1	130	309	439	125	125	96.2	92.9	140	k__Fungi	p__Ascomycota	c__Dothideomycetes	o__Mycosphaerellales	f__Neodevriesiaceae	g__Neodevriesiaceae_gen_Incertae_sedis	s__Neodevriesiaceae_sp
OTU0048	MOSTABUND | n=405/181	140	78	181	1	5	LC639279	SH0946103.10FU	5.15992e-066	253.758	280	1	140	370	509	140	140	100	100	140	k__Fungi	p__Ascomycota	c__Leotiomycetes	o__Helotiales	f__Myxotrichaceae	g__Oidiodendron	s__Oidiodendron_griseum
OTU0049	MOSTABUND | n=396/202	102	169	125	0	0	LC272919	SH0915560.10FU	1.19352e-068	262.775	290	1	162	362	525	158	158	97.5	100	162	k__Fungi	p__Ascomycota	c__Dothideomycetes	o__Myriangiales	f__Myriangiales_fam_Incertae_sedis	g__Myriangiales_gen_Incertae_sedis	s__Myriangiales_sp
OTU0050	MOSTABUND | n=396/276	87	61	85	136	27	MH864711	SH0821638.10FU	1.74907e-072	275.398	304	1	152	414	565	152	152	100	100	152	k__Fungi	p__Ascomycota	c__Dothideomycetes	o__Pleosporales	f__Phaeosphaeriaceae	g__Paraphoma	s__Paraphoma_fimeti
OTU0051	MOSTABUND | n=395/208	99	86	210	0	0	LC646545	SH0946018.10FU	5.15992e-066	253.758	280	1	140	344	483	140	140	100	100	140	k__Fungi	p__Ascomycota	c__Leotiomycetes	o__Helotiales	f__Amorphothecaceae	g__Amorphotheca	s__Amorphotheca_resinae
OTU0052	MOSTABUND | n=378/212	122	135	121	0	0	KY105956	SH0892770.10FU	9.36387e-090	333.106	368	1	184	467	650	184	184	100	100	184	k__Fungi	p__Ascomycota	c__Saccharomycetes	o__Saccharomycetales	f__Debaryomycetaceae	g__Yamadazyma	s__Yamadazyma_tumulicola
OTU0053	MOSTABUND | n=363/171	103	68	121	71	0	UDB01965427	SH0904668.10FU	2.17568e-072	275.398	304	1	182	350	530	171	171	94	100	182	k__Fungi	p__Ascomycota	c__Eurotiomycetes	o__Chaetothyriales	f__Herpotrichiellaceae	g__Exophiala	s__Exophiala_sp
OTU0054	MOSTABUND | n=363/175	0	0	0	269	94	KF007241	SH0924838.10FU	2.86404e-123	444.915	492	1	246	452	697	246	246	100	100	246	k__Fungi	p__Basidiomycota	c__Agaricomycetes	o__Boletales	f__Rhizopogonaceae	g__Rhizopogon	s__Rhizopogon_sp
OTU0055	MOSTABUND | n=357/302	0	0	1	254	102	UDB04521142	SH0734441.10FU	3.06224e-096	354.747	392	1	196	316	511	196	196	100	100	196	k__Fungi	p__Basidiomycota	c__Agaricomycetes	o__Phallales	f__Phallaceae	g__Phallus	s__Phallus_sp
OTU0056	MOSTABUND | n=350/321	0	0	0	141	209	UDB05286009	SH0897724.10FU	3.69598e-068	260.971	288	1	144	320	463	144	144	100	98	147	k__Fungi	p__Ascomycota	c__Leotiomycetes	o__Thelebolales	f__Pseudeurotiaceae	g__Pseudeurotium	s__Pseudeurotium_sp
OTU0057	MOSTABUND | n=348/210	0	0	0	99	249	OR162461	SH0976025.10FU	1.00446e-102	376.387	416	1	208	430	637	208	208	100	100	208	k__Fungi	p__Basidiomycota	c__Agaricomycetes	o__Agaricales	f__Hydnangiaceae	g__Laccaria	s__Laccaria_fraterna
OTU0058	MOSTABUND | n=347/218	0	0	0	196	151	UDB05286034	SH0897487.10FU	8.69211e-070	266.382	294	1	147	320	466	147	147	100	100	147	k__Fungi	p__Ascomycota	c__Leotiomycetes	o__Thelebolales	f__Pseudeurotiaceae	g__Pseudeurotium	s__Pseudeurotium_sp
OTU0059	MOSTABUND | n=300/162	116	70	114	0	0	KF258726	SH1045405.10FU	4.07308e-006	55.3874	60	4	60	328	382	47	47	82.5	28.6	199	k__Fungi	p__Basidiomycota	c__Tritirachiomycetes	o__Tritirachiales	f__Tritirachiaceae	g__Paratritirachium	s__Paratritirachium_cylindroconium
OTU0060	MOSTABUND | n=280/141	98	56	126	0	0	MZ314474	SH0743871.10FU	2.92934e-076	288.022	318	1	159	256	414	159	159	100	100	159	k__Fungi	p__Basidiomycota	c__Tremellomycetes	o__Tremellales	f__Naemateliaceae	g__Naematelia	s__Naematelia_encephala
OTU0061	MOSTABUND | n=269/138	91	58	120	0	0	HG937089	SH0964646.10FU	3.05811e-090	334.91	370	1	207	363	567	200	200	96.6	100	207	k__Fungi	p__Basidiomycota	c__Basidiomycota_cls_Incertae_sedis	o__Basidiomycota_ord_Incertae_sedis	f__Basidiomycota_fam_Incertae_sedis	g__Basidiomycota_gen_Incertae_sedis	s__Basidiomycota_sp
OTU0062	MOSTABUND | n=265/239	4	1	2	187	71	UDB0681378	SH0950387.10FU	8.69211e-070	266.382	294	1	147	321	467	147	147	100	100	147	k__Fungi	p__Ascomycota	c__Leotiomycetes	o__Thelebolales	f__Pseudeurotiaceae	g__Pseudeurotium	s__Pseudeurotium_sp
OTU0063	MOSTABUND | n=257/228	0	0	0	65	192	UDB03513710	SH0989668.10FU	7.83519e-111	403.438	446	1	223	381	603	223	223	100	100	223	k__Fungi	p__Basidiomycota	c__Agaricomycetes	o__Agaricales	f__Hygrophoraceae	g__Hygrocybe	s__Hygrocybe_sp
OTU0064	MOSTABUND | n=238/189	0	0	0	200	38	UDB05282909	SH0897724.10FU	3.00814e-069	264.578	292	1	146	320	465	146	146	100	100	146	k__Fungi	p__Ascomycota	c__Leotiomycetes	o__Thelebolales	f__Pseudeurotiaceae	g__Pseudeurotium	s__Pseudeurotium_sp
OTU0065	MOSTABUND | n=228/143	80	50	92	5	1	UDB03381023	SH0748867.10FU	8.67994e-006	53.584	58	39	89	402	454	45	45	88.2	38.6	132	k__Fungi	p__Ascomycota	c__Eurotiomycetes	o__Chaetothyriales	f__Herpotrichiellaceae	g__Herpotrichiellaceae_gen_Incertae_sedis	s__Herpotrichiellaceae_sp
OTU0066	MOSTABUND | n=226/44	35	37	154	0	0	UDB05269281	SH0868848.10FU	1.73234e-079	298.842	330	1	168	393	560	167	167	99.4	100	168	k__Fungi	p__Ascomycota	c__Dothideomycetes	o__Dothideomycetes_ord_Incertae_sedis	f__Dothideomycetes_fam_Incertae_sedis	g__Dothideomycetes_gen_Incertae_sedis	s__Dothideomycetes_sp
OTU0067	MOSTABUND | n=217/198	0	0	0	81	136	UDB03165551	SH0738311.10FU	4.58051e-114	414.258	458	1	234	306	539	232	232	99.1	100	234	k__Fungi	p__Basidiomycota	c__Agaricomycetes	o__Agaricales	f__Clavariaceae	g__Clavaria	s__Clavaria_sp
OTU0068	MOSTABUND | n=217/186	0	0	2	204	11	OQ600167	SH0897344.10FU	3.00814e-069	264.578	292	1	146	335	480	146	146	100	100	146	k__Fungi	p__Ascomycota	c__Leotiomycetes	o__Thelebolales	f__Pseudeurotiaceae	g__Beskidomyces	s__Beskidomyces_laricis
OTU0069	MOSTABUND | n=210/86	72	50	79	2	7	KC785575	SH0934675.10FU	1.20994e-101	372.78	412	1	206	348	553	206	206	100	100	206	k__Fungi	p__Basidiomycota	c__Exobasidiomycetes	o__Exobasidiales	f__Exobasidiaceae	g__Exobasidiaceae_gen_Incertae_sedis	s__Exobasidiaceae_sp
OTU0070	MOSTABUND | n=209/177	0	0	0	60	149	UDB01445243	SH0940174.10FU	2.0345e-078	295.235	326	1	163	339	501	163	163	100	100	163	k__Fungi	p__Ascomycota	c__Eurotiomycetes	o__Eurotiales	f__Aspergillaceae	g__Aspergillus	s__Aspergillus_sp
OTU0071	MOSTABUND | n=209/181	0	0	0	209	0	UDB07390639	SH0746000.10FU	5.03447e-120	434.095	480	1	240	433	672	240	240	100	100	240	k__Fungi	p__Chytridiomycota	c__Spizellomycetes	o__Spizellomycetales	f__Spizellomycetales_fam_Incertae_sedis	g__Spizellomycetales_gen_Incertae_sedis	s__Spizellomycetales_sp
OTU0072	MOSTABUND | n=202/3	75	33	94	0	0	UDB07674985	SH1012176.10FU	1.86589e-065	251.955	278	1	144	315	458	142	142	98.6	100	144	k__Fungi	p__Ascomycota	c__Leotiomycetes	o__Helotiales	f__Pezizellaceae	g__Ciliolarina	s__Ciliolarina_sp
OTU0073	MOSTABUND | n=191/100	5	0	8	106	72	MZ025963	SH0763728.10FU	5.05192e-073	277.202	306	1	153	325	477	153	153	100	100	153	k__Fungi	p__Ascomycota	c__Dothideomycetes	o__Mycosphaerellales	f__Neodevriesiaceae	g__Neodevriesia	s__Neodevriesia_kalakoutskii
OTU0074	MOSTABUND | n=190/171	0	0	0	98	92	UDB06355205	SH0862732.10FU	2.0345e-078	295.235	326	1	163	342	504	163	163	100	100	163	k__Fungi	p__Ascomycota	c__Eurotiomycetes	o__Chaetothyriales	f__Herpotrichiellaceae	g__Rhinocladiella	s__Rhinocladiella_sp
OTU0075	MOSTABUND | n=185/96	79	35	71	0	0	OR091314	SH0801460.10FU	2.44154e-077	291.629	322	1	161	347	507	161	161	100	100	161	k__Fungi	p__Ascomycota	c__Eurotiomycetes	o__Phaeomoniellales	f__Celotheliaceae	g__Phaeomoniella	s__Phaeomoniella_sp
OTU0076	MOSTABUND | n=176/66	53	32	80	10	1	OU953798	SH1012135.10FU	1.04097e-068	262.775	290	1	145	317	461	145	145	100	100	145	k__Fungi	p__Ascomycota	c__Leotiomycetes	o__Helotiales	f__Hyaloscyphaceae	g__Hyaloscyphaceae_gen_Incertae_sedis	s__Hyaloscyphaceae_sp
OTU0077	MOSTABUND | n=174/52	68	35	71	0	0	MH864788	SH0885672.10FU	1.35386e-087	325.893	360	1	180	357	536	180	180	100	100	180	k__Fungi	p__Ascomycota	c__Eurotiomycetes	o__Chaetothyriales	f__Herpotrichiellaceae	g__Rhinocladiella	s__Rhinocladiella_atrovirens
OTU0078	MOSTABUND | n=158/102	45	28	85	0	0	UDB03126426	SH0966817.10FU	1.02392e-049	199.657	220	1	143	327	469	132	132	92.3	100	143	k__Fungi	p__Ascomycota	c__Leotiomycetes	o__Leotiales	f__Tympanidaceae	g__Claussenomyces	s__Claussenomyces_sp
OTU0079	MOSTABUND | n=156/89	0	0	0	114	42	UDB04205463	SH0939768.10FU	1.21684e-074	282.612	312	1	156	329	484	156	156	100	100	156	k__Fungi	p__Ascomycota	c__Eurotiomycetes	o__Eurotiales	f__Aspergillaceae	g__Penicillium	s__Penicillium_sp
OTU0080	MOSTABUND | n=155/110	56	31	68	0	0	LC015666	SH0960444.10FU	6.77811e-052	206.87	228	1	141	341	483	132	132	93.6	100	141	k__Fungi	p__Ascomycota	c__Lecanoromycetes	o__Lecanoromycetes_ord_Incertae_sedis	f__Lecanoromycetes_fam_Incertae_sedis	g__Lecanoromycetes_gen_Incertae_sedis	s__Lecanoromycetes_sp
OTU0081	MOSTABUND | n=154/62	50	31	62	6	5	MZ133732	SH0875505.10FU	1.25628e-055	219.494	242	1	160	421	584	148	148	92.5	100	160	k__Fungi	p__Ascomycota	c__Eurotiomycetes	o__Onygenales	f__Gymnoascaceae	g__Gymnoascus	s__Gymnoascus_halophilus
OTU0082	MOSTABUND | n=151/44	48	43	53	6	1	OR531385	SH0986908.10FU	2.82408e-083	311.466	344	1	172	390	561	172	172	100	100	172	k__Fungi	p__Ascomycota	c__Eurotiomycetes	o__Chaetothyriales	f__Herpotrichiellaceae	g__Exophiala	s__Exophiala_xenobiotica
OTU0083	MOSTABUND | n=143/28	0	0	0	94	49	UDB06504493	SH0924838.10FU	1.00891e-122	443.112	490	1	248	383	630	247	247	99.6	100	248	k__Fungi	p__Basidiomycota	c__Agaricomycetes	o__Boletales	f__Rhizopogonaceae	g__Rhizopogon	s__Rhizopogon_sp
OTU0084	MOSTABUND | n=137/77	32	35	70	0	0	LS998796	SH1015806.10FU	6.94827e-059	230.314	254	1	158	335	495	148	148	93.7	98.8	160	k__Fungi	p__Ascomycota	c__Dothideomycetes	o__Venturiales	f__Cylindrosympodiaceae	g__Septonema	s__Septonema_sp
OTU0085	MOSTABUND | n=130/60	35	22	73	0	0	UDB02000288	SH0944003.10FU	1.1649e-044	183.427	202	1	160	346	505	141	141	88.1	80.4	199	k__Fungi	p__Ascomycota	c__Eurotiomycetes	o__Chaetothyriales	f__Herpotrichiellaceae	g__Exophiala	s__Exophiala_sp
OTU0086	MOSTABUND | n=128/69	46	21	61	0	0	DQ069056	SH0866871.10FU	1.38351e-042	176.213	194	1	149	347	492	132	132	88.6	90.9	164	k__Fungi	p__Ascomycota	c__Eurotiomycetes	o__Chaetothyriales	f__Chaetothyriales_fam_Incertae_sedis	g__Chaetothyriales_gen_Incertae_sedis	s__Chaetothyriales_sp
OTU0087	MOSTABUND | n=127/60	42	25	60	0	0	UDB05377383	SH0949870.10FU	5.38872e-113	410.651	454	1	227	298	524	227	227	100	100	227	k__Fungi	p__Basidiomycota	c__Cystobasidiomycetes	o__Erythrobasidiales	f__Erythrobasidiales_fam_Incertae_sedis	g__Erythrobasidiales_gen_Incertae_sedis	s__Erythrobasidiales_sp
OTU0088	MOSTABUND | n=122/69	0	0	0	51	71	UDB02373315	SH0945906.10FU	5.15992e-066	253.758	280	1	140	324	463	140	140	100	100	140	k__Fungi	p__Ascomycota	c__Leotiomycetes	o__Helotiales	f__Myxotrichaceae	g__Oidiodendron	s__Oidiodendron_sp
OTU0089	MOSTABUND | n=122/3	0	0	0	114	8	PP034033	SH0939544.10FU	2.99694e-076	288.022	318	1	162	208	369	161	161	99.4	100	162	k__Fungi	p__Ascomycota	c__Eurotiomycetes	o__Eurotiales	f__Aspergillaceae	g__Penicillium	s__Penicillium_virgatum
OTU0090	MOSTABUND | n=121/39	44	30	47	0	0	UDB02013834	SH0904555.10FU	7.83516e-085	316.876	350	1	196	361	557	189	189	96.4	98.5	199	k__Fungi	p__Ascomycota	c__Eurotiomycetes	o__Chaetothyriales	f__Herpotrichiellaceae	g__Exophiala	s__Exophiala_sp
OTU0091	MOSTABUND | n=119/57	49	30	40	0	0	UDB06550829	SH0946271.10FU	1.00446e-102	376.387	416	1	208	332	539	208	208	100	100	208	k__Fungi	p__Basidiomycota	c__Microbotryomycetes	o__Sporidiobolales	f__Sporidiobolaceae	g__Rhodotorula	s__Rhodotorula_sp
OTU0092	MOSTABUND | n=118/109	0	0	0	75	43	OK335190	SH1006324.10FU	2.84171e-057	224.904	248	1	153	372	521	143	143	93.5	98.7	155	k__Fungi	p__Ascomycota	c__Dothideomycetes	o__Pleosporales	f__Pseudopyrenochaetaceae	g__Pseudopyrenochaeta	s__Pseudopyrenochaeta_sp
OTU0093	MOSTABUND | n=116/53	7	26	82	1	0	AM901832	SH0934681.10FU	5.04702e-107	390.814	432	1	227	539	762	223	223	98.2	100	227	k__Fungi	p__Basidiomycota	c__Exobasidiomycetes	o__Exobasidiales	f__Exobasidiaceae	g__Exobasidium	s__Exobasidium_sp
OTU0094	MOSTABUND | n=105/91	11	2	8	58	26
OTU0095	MOSTABUND | n=101/86	0	0	0	57	44	UDB01489881	SH0861592.10FU	3.04201e-076	288.022	318	1	164	336	499	162	162	98.8	100	164	k__Fungi	p__Basidiomycota	c__Basidiomycota_cls_Incertae_sedis	o__Basidiomycota_ord_Incertae_sedis	f__Basidiomycota_fam_Incertae_sedis	g__Basidiomycota_gen_Incertae_sedis	s__Basidiomycota_sp
OTU0096	MOSTABUND | n=100/58	0	0	0	96	4	PP034033	SH0939544.10FU	5.07499e-067	257.365	284	1	162	208	369	154	154	95.1	100	162	k__Fungi	p__Ascomycota	c__Eurotiomycetes	o__Eurotiales	f__Aspergillaceae	g__Penicillium	s__Penicillium_virgatum
OTU0097	MOSTABUND | n=94/80	0	0	0	29	65	ON072206	SH0873632.10FU	1.74883e-119	432.291	478	1	239	458	696	239	239	100	100	239	k__Fungi	p__Basidiomycota	c__Agaricomycetes	o__Boletales	f__Rhizopogonaceae	g__Rhizopogon	s__Rhizopogon_evadens
OTU0098	MOSTABUND | n=93/26	10	7	76	0	0	OK335192	SH0888269.10FU	2.82408e-083	311.466	344	1	172	350	521	172	172	100	100	172	k__Fungi	p__Ascomycota	c__Eurotiomycetes	o__Eurotiales	f__Aspergillaceae	g__Aspergillus	s__Aspergillus_sp
OTU0099	MOSTABUND | n=92/74	0	0	0	16	76	UDB03850339	SH0901200.10FU	4.89182e-080	300.646	332	1	166	337	502	166	166	100	100	166	k__Fungi	p__Ascomycota	c__Eurotiomycetes	o__Eurotiales	f__Aspergillaceae	g__Penicillium	s__Penicillium_sp
OTU0100	MOSTABUND | n=90/75	0	0	2	53	35	OR984152	SH0939544.10FU	5.87245e-079	297.039	328	1	164	365	528	164	164	100	100	164	k__Fungi	p__Ascomycota	c__Eurotiomycetes	o__Eurotiales	f__Aspergillaceae	g__Penicillium	s__Penicillium_sp
OTU0101	MOSTABUND | n=88/1	0	0	0	83	5	PP034033	SH0939544.10FU	2.46004e-077	291.629	322	2	162	209	369	161	161	100	99.4	162	k__Fungi	p__Ascomycota	c__Eurotiomycetes	o__Eurotiales	f__Aspergillaceae	g__Penicillium	s__Penicillium_virgatum
OTU0102	MOSTABUND | n=81/39	0	0	0	57	24	OM533652	SH0939727.10FU	8.65093e-077	289.825	320	1	163	386	548	162	162	99.4	100	163	k__Fungi	p__Ascomycota	c__Eurotiomycetes	o__Eurotiales	f__Aspergillaceae	g__Penicillium	s__Penicillium_restrictum
OTU0103	MOSTABUND | n=81/61	0	0	1	57	23	OR499153	SH0939673.10FU	1.21684e-074	282.612	312	1	156	391	546	156	156	100	100	156	k__Fungi	p__Ascomycota	c__Eurotiomycetes	o__Eurotiales	f__Aspergillaceae	g__Penicillium	s__Penicillium_sp
OTU0104	MOSTABUND | n=77/54	0	0	0	29	48	UDB06507358	SH0960261.10FU	5.24947e-133	477.376	528	1	264	498	761	264	264	100	100	264	k__Fungi	p__Basidiomycota	c__Agaricomycetes	o__Boletales	f__Rhizopogonaceae	g__Rhizopogon	s__Rhizopogon_sp
OTU0105	MOSTABUND | n=75/24	0	0	0	51	24	UDB07111466	SH0742484.10FU	1.75489e-099	365.567	404	1	202	325	526	202	202	100	100	202	k__Fungi	p__Mucoromycota	c__Umbelopsidomycetes	o__Umbelopsidales	f__Umbelopsidaceae	g__Umbelopsis	s__Umbelopsis_sp
OTU0106	MOSTABUND | n=75/31	37	12	26	0	0	MZ573462	SH0735889.10FU	8.1477e-084	313.269	346	1	173	446	618	173	173	100	100	173	k__Fungi	p__Ascomycota	c__Dothideomycetes	o__Venturiales	f__Sympoventuriaceae	g__Ochroconis	s__Ochroconis_sp
OTU0107	MOSTABUND | n=74/11	24	14	36	0	0
OTU0108	MOSTABUND | n=74/62	0	0	0	25	49	OQ429797	SH0990384.10FU	4.89182e-080	300.646	332	1	166	344	509	166	166	100	100	166	k__Fungi	p__Ascomycota	c__Sordariomycetes	o__Hypocreales	f__Bionectriaceae	g__Proliferophialis	s__Proliferophialis_apiculata
OTU0109	MOSTABUND | n=71/33	16	14	41	0	0	OR898185	SH0815720.10FU	1.36485e-094	349.336	386	1	204	454	658	201	201	98.5	100	204	k__Fungi	p__Basidiomycota	c__Agaricomycetes	o__Agaricales	f__Pleurotaceae	g__Hohenbuehelia	s__Hohenbuehelia_grisea
OTU0110	MOSTABUND | n=71/33	20	23	28	0	0	KT264384	SH0904651.10FU	9.20629e-084	313.269	346	1	193	387	578	186	186	96.4	100	193	k__Fungi	p__Ascomycota	c__Eurotiomycetes	o__Chaetothyriales	f__Herpotrichiellaceae	g__Exophiala	s__Exophiala_sp
OTU0111	MOSTABUND | n=71/57	0	0	0	47	24	UDB03471357	SH0897504.10FU	3.60202e-068	260.971	288	1	144	322	465	144	144	100	100	144	k__Fungi	p__Ascomycota	c__Leotiomycetes	o__Helotiales	f__Hyaloscyphaceae	g__Hyaloscypha	s__Hyaloscypha_sp
OTU0112	MOSTABUND | n=70/60	0	1	0	66	3	UDB03452221	SH0966890.10FU	3.00814e-069	264.578	292	1	146	518	663	146	146	100	100	146	k__Fungi	p__Ascomycota	c__Leotiomycetes	o__Helotiales	f__Hyaloscyphaceae	g__Hyaloscypha	s__Hyaloscypha_sp
OTU0113	MOSTABUND | n=67/51	0	0	0	27	40	OP895760	SH0954984.10FU	5.33654e-093	343.926	380	1	190	398	587	190	190	100	100	190	k__Fungi	p__Ascomycota	c__Sordariomycetes	o__Hypocreales	f__Clavicipitaceae	g__Keithomyces	s__Keithomyces_sp
OTU0114	MOSTABUND | n=67/37	22	10	35	0	0	OX346372	SH0763677.10FU	1.30096e-067	259.168	286	1	148	318	465	146	146	98.6	100	148	k__Fungi	p__Ascomycota	c__Dothideomycetes	o__Mycosphaerellales	f__Neodevriesiaceae	g__Neodevriesia	s__Neodevriesia_fraserae
OTU0115	MOSTABUND | n=66/60	0	0	0	32	34	UDB02979360	SH0950390.10FU	1.04097e-068	262.775	290	1	145	334	478	145	145	100	100	145	k__Fungi	p__Ascomycota	c__Leotiomycetes	o__Thelebolales	f__Pseudeurotiaceae	g__Geomyces	s__Geomyces_sp
OTU0116	MOSTABUND | n=66/60	0	0	0	37	29	LC639299	SH0977637.10FU	5.05192e-073	277.202	306	1	153	303	455	153	153	100	100	153	k__Fungi	p__Ascomycota	c__Leotiomycetes	o__Helotiales	f__Myxotrichaceae	g__Skoua	s__Skoua_fertilis
OTU0117	MOSTABUND | n=65/56	0	0	0	18	47	MZ435253	SH0838808.10FU	5.71296e-042	174.41	192	1	153	395	549	136	136	88.9	80.5	190	k__Fungi	p__Ascomycota	c__Eurotiomycetes	o__Onygenales	f__Onygenaceae	g__Amauroascus	s__Amauroascus_albicans
OTU0118	MOSTABUND | n=64/22	23	10	31	0	0	UDB01990490	SH0976639.10FU	3.51261e-082	307.859	340	1	175	356	530	173	173	98.9	100	175	k__Fungi	p__Ascomycota	c__Eurotiomycetes	o__Chaetothyriales	f__Herpotrichiellaceae	g__Exophiala	s__Exophiala_sp
OTU0119	MOSTABUND | n=64/51	0	0	0	27	37	UDB04134014	SH0939783.10FU	1.01457e-075	286.219	316	1	158	329	486	158	158	100	100	158	k__Fungi	p__Ascomycota	c__Eurotiomycetes	o__Eurotiales	f__Aspergillaceae	g__Penicillium	s__Penicillium_sp
OTU0120	MOSTABUND | n=64/46	0	0	0	40	24	OQ875727	SH0742461.10FU	7.33184e-098	360.157	398	1	199	379	577	199	199	100	100	199	k__Fungi	p__Mucoromycota	c__Umbelopsidomycetes	o__Umbelopsidales	f__Umbelopsidaceae	g__Umbelopsis	s__Umbelopsis_vinacea
OTU0121	MOSTABUND | n=63/36	24	10	29	0	0	KM104110	SH0967380.10FU	3.01003e-063	244.741	270	1	151	366	517	146	146	96.7	98.1	154	k__Fungi	p__Fungi_phy_Incertae_sedis	c__Fungi_cls_Incertae_sedis	o__Fungi_ord_Incertae_sedis	f__Fungi_fam_Incertae_sedis	g__Fungi_gen_Incertae_sedis	s__Fungi_sp
OTU0122	MOSTABUND | n=62/52	0	0	0	62	0	JX070046	SH0756005.10FU	9.89864e-071	269.988	298	1	194	411	602	180	180	92.8	100	194	k__Fungi	p__Ascomycota	c__Eurotiomycetes	o__Ascosphaerales	f__Ascosphaeraceae	g__Ascosphaera	s__Ascosphaera_sp
OTU0123	MOSTABUND | n=61/49	0	0	0	0	61	OQ410477	SH0903423.10FU	5.64238e-086	320.483	354	1	177	415	591	177	177	100	100	177	k__Fungi	p__Ascomycota	c__Eurotiomycetes	o__Eurotiales	f__Aspergillaceae	g__Aspergillus	s__Aspergillus_penicillioides
OTU0124	MOSTABUND | n=61/59	0	0	0	37	24	OQ799075	SH0991302.10FU	5.05192e-073	277.202	306	1	153	370	522	153	153	100	100	153	k__Fungi	p__Ascomycota	c__Dothideomycetes	o__Pleosporales	f__Didymosphaeriaceae	g__Paraconiothyrium	s__Paraconiothyrium_kelleni
OTU0125	MOSTABUND | n=59/35	22	17	20	0	0	UDB0754280	SH0867027.10FU	8.38042e-053	210.477	232	1	199	282	479	169	169	84.9	100	199	k__Fungi	p__Basidiomycota	c__Pucciniomycetes	o__Platygloeales	f__Platygloeaceae	g__Platygloea	s__Platygloea_disciformis
OTU0126	MOSTABUND | n=57/31	18	21	18	0	0	OU989284	SH0843807.10FU	6.05523e-072	273.595	302	1	151	351	501	151	151	100	100	151	k__Fungi	p__Ascomycota	c__Saccharomycetes	o__Saccharomycetales	f__Trichomonascaceae	g__Blastobotrys	s__Blastobotrys_arbuscula
OTU0127	MOSTABUND | n=57/50	0	0	0	57	0	UDB07376942	SH0903787.10FU	2.25645e-111	405.241	448	1	224	445	668	224	224	100	100	224	k__Fungi	p__Chytridiomycota	c__Spizellomycetes	o__Spizellomycetales	f__Spizellomycetaceae	g__Spizellomyces	s__Spizellomyces_sp
OTU0128	MOSTABUND | n=53/42	0	0	0	17	36	UDB02898236	SH0996585.10FU	2.22661e-091	338.516	374	1	187	296	482	187	187	100	100	187	k__Fungi	p__Ascomycota	c__Sordariomycetes	o__Hypocreales	f__Cordycipitaceae	g__Leptobacillium	s__Leptobacillium_sp
OTU0129	MOSTABUND | n=53/41	3	7	7	22	14	LC643135	SH0878054.10FU	4.07407e-081	304.252	336	1	168	384	551	168	168	100	100	168	k__Fungi	p__Ascomycota	c__Eurotiomycetes	o__Eurotiales	f__Aspergillaceae	g__Aspergillus	s__Aspergillus_conicus
OTU0130	MOSTABUND | n=52/22	0	0	0	14	38	OW983292	SH0978756.10FU	1.74907e-072	275.398	304	1	152	363	514	152	152	100	100	152	k__Fungi	p__Ascomycota	c__Sordariomycetes	o__Sordariales	f__Chaetomiaceae	g__Trichocladium	s__Trichocladium_nigrospermum
OTU0131	MOSTABUND | n=52/30	0	0	0	36	16	OP740359	SH0960692.10FU	5.65689e-126	453.932	502	1	251	338	588	251	251	100	100	251	k__Fungi	p__Mortierellomycota	c__Mortierellomycetes	o__Mortierellales	f__Mortierellaceae	g__Linnemannia	s__Linnemannia_elongata
OTU0132	MOSTABUND | n=52/29	8	6	5	33	0	UDB01624955	SH0976701.10FU	3.32562e-089	331.303	366	1	188	353	540	186	186	98.9	100	188	k__Fungi	p__Ascomycota	c__Eurotiomycetes	o__Chaetothyriales	f__Herpotrichiellaceae	g__Capronia	s__Capronia_sp
OTU0133	MOSTABUND | n=52/39	0	0	0	38	14	UDB07392434	SH0927176.10FU	6.6981e-112	407.044	450	2	231	474	703	228	228	99.1	99.6	231	k__Fungi	p__Chytridiomycota	c__Spizellomycetes	o__Spizellomycetales	f__Spizellomycetales_fam_Incertae_sedis	g__Spizellomycetales_gen_Incertae_sedis	s__Spizellomycetales_sp
OTU0134	MOSTABUND | n=52/43	0	0	0	30	22	OR843989	SH0742488.10FU	2.54392e-097	358.353	396	1	198	362	559	198	198	100	100	198	k__Fungi	p__Mucoromycota	c__Umbelopsidomycetes	o__Umbelopsidales	f__Umbelopsidaceae	g__Umbelopsis	s__Umbelopsis_nana
OTU0135	MOSTABUND | n=51/45	0	0	0	29	22	MN156552	SH0749890.10FU	2.88333e-083	311.466	344	1	175	952	1126	174	174	99.4	100	175	k__Fungi	p__Ascomycota	c__Eurotiomycetes	o__Eurotiales	f__Aspergillaceae	g__Monascus	s__Monascus_floridanus
OTU0136	MOSTABUND | n=50/33	0	0	0	2	48	UDB04073335	SH0901200.10FU	1.17564e-081	306.056	338	1	169	337	505	169	169	100	100	169	k__Fungi	p__Ascomycota	c__Eurotiomycetes	o__Eurotiales	f__Aspergillaceae	g__Penicillium	s__Penicillium_sp
OTU0137	MOSTABUND | n=50/24	0	0	0	6	44	UDB02780224	SH0908246.10FU	1.06789e-068	262.775	290	1	148	319	466	147	147	99.3	100	148	k__Fungi	p__Ascomycota	c__Leotiomycetes	o__Helotiales	f__Helotiales_fam_Incertae_sedis	g__Leohumicola	s__Leohumicola_sp
OTU0138	MOSTABUND | n=49/24	0	0	0	21	28	OR346295	SH0777285.10FU	1.96551e-125	452.129	500	1	250	319	568	250	250	100	100	250	k__Fungi	p__Mortierellomycota	c__Mortierellomycetes	o__Mortierellales	f__Mortierellaceae	g__Mortierella	s__Mortierella_alpina
OTU0139	MOSTABUND | n=48/9	16	8	24	0	0	OR091312	SH0974820.10FU	2.44008e-078	295.235	326	1	191	369	559	182	182	95.3	100	191	k__Fungi	p__Ascomycota	c__Eurotiomycetes	o__Chaetothyriales	f__Herpotrichiellaceae	g__Capronia	s__Capronia_sp
OTU0140	MOSTABUND | n=48/25	17	19	12	0	0	LT548263	SH0734002.10FU	1.23021e-089	333.106	368	1	234	342	580	220	220	94	100	234	k__Fungi	p__Basidiomycota	c__Microbotryomycetes	o__Microbotryomycetes_ord_Incertae_sedis	f__Colacogloeaceae	g__Colacogloea	s__Colacogloea_sp
OTU0141	MOSTABUND | n=47/23	16	12	19	0	0
OTU0142	MOSTABUND | n=46/17	18	15	13	0	0	UDB01571240	SH0947752.10FU	6.1964e-099	363.763	402	1	204	297	500	203	203	99.5	100	204	k__Fungi	p__Basidiomycota	c__Cystobasidiomycetes	o__Buckleyzymales	f__Buckleyzymaceae	g__Buckleyzyma	s__Buckleyzyma_sp
OTU0143	MOSTABUND | n=45/39	0	0	0	20	25	OP610057	SH1022756.10FU	5.64238e-086	320.483	354	1	177	906	1082	177	177	100	100	177	k__Fungi	p__Ascomycota	c__Geoglossomycetes	o__Geoglossales	f__Geoglossaceae	g__Glutinoglossum	s__Glutinoglossum_persoonii
OTU0144	MOSTABUND | n=44/36	0	0	0	35	9	OR752277	SH0940404.10FU	2.0345e-078	295.235	326	1	163	353	515	163	163	100	100	163	k__Fungi	p__Ascomycota	c__Eurotiomycetes	o__Eurotiales	f__Aspergillaceae	g__Penicillium	s__Penicillium_canescens
OTU0145	MOSTABUND | n=43/11	20	9	14	0	0	KF360373	SH0737941.10FU	5.52934e-060	233.921	258	1	139	317	455	135	135	97.1	89.1	156	k__Fungi	p__Ascomycota	c__Lecanoromycetes	o__Umbilicariales	f__Elixiaceae	g__Elixia	s__Elixia_flexella
OTU0146	MOSTABUND | n=39/36	0	0	0	26	13	MG906870	SH0978456.10FU	1.74907e-072	275.398	304	1	152	309	460	152	152	100	100	152	k__Fungi	p__Ascomycota	c__Sordariomycetes	o__Sordariales	f__Chaetomiaceae	g__Chaetomium	s__Chaetomium_sp
OTU0147	MOSTABUND | n=38/37	0	0	0	12	26	UDB03477634	SH0897702.10FU	8.69211e-070	266.382	294	1	147	317	463	147	147	100	100	147	k__Fungi	p__Ascomycota	c__Leotiomycetes	o__Helotiales	f__Hyaloscyphaceae	g__Hyaloscyphaceae_gen_Incertae_sedis	s__Hyaloscyphaceae_sp
OTU0148	MOSTABUND | n=38/1	21	12	5	0	0	UDB03610486	SH1012176.10FU	1.53162e-066	255.561	282	1	144	317	460	143	143	99.3	100	144	k__Fungi	p__Ascomycota	c__Leotiomycetes	o__Helotiales	f__Helotiales_fam_Incertae_sedis	g__Infundichalara	s__Infundichalara_sp
OTU0149	MOSTABUND | n=38/16	0	0	0	23	15	OP179073	SH0940589.10FU	7.04812e-078	293.432	324	1	162	400	561	162	162	100	100	162	k__Fungi	p__Ascomycota	c__Eurotiomycetes	o__Eurotiales	f__Aspergillaceae	g__Penicillium	s__Penicillium_sp
OTU0150	MOSTABUND | n=36/3	0	0	0	24	12	OP178981	SH0940661.10FU	1.69495e-079	298.842	330	1	165	393	557	165	165	100	100	165	k__Fungi	p__Ascomycota	c__Eurotiomycetes	o__Eurotiales	f__Aspergillaceae	g__Penicillium	s__Penicillium_sp
OTU0151	MOSTABUND | n=35/1	13	5	17	0	0	UDB03610486	SH1012176.10FU	1.86589e-065	251.955	278	1	144	317	460	142	142	98.6	100	144	k__Fungi	p__Ascomycota	c__Leotiomycetes	o__Helotiales	f__Helotiales_fam_Incertae_sedis	g__Infundichalara	s__Infundichalara_sp
OTU0152	MOSTABUND | n=35/16	8	6	21	0	0	HQ211632	SH0934667.10FU	6.82629e-092	340.32	376	1	198	373	570	194	194	98	100	198	k__Fungi	p__Basidiomycota	c__Exobasidiomycetes	o__Exobasidiales	f__Exobasidiaceae	g__Exobasidiaceae_gen_Incertae_sedis	s__Exobasidiaceae_sp
OTU0153	MOSTABUND | n=35/15	16	4	9	1	5	KU580076	SH0959039.10FU	2.92934e-076	288.022	318	1	159	355	513	159	159	100	100	159	k__Fungi	p__Ascomycota	c__Dothideomycetes	o__Capnodiales	f__Capnodiales_fam_Incertae_sedis	g__Capnodiales_gen_Incertae_sedis	s__Capnodiales_sp
OTU0154	MOSTABUND | n=34/16	13	10	11	0	0	OR623240	SH0841251.10FU	1.08814e-095	352.943	390	1	199	263	462	199	199	100	100	199	k__Fungi	p__Basidiomycota	c__Agaricostilbomycetes	o__Agaricostilbales	f__Chionosphaeraceae	g__Kurtzmanomyces	s__Kurtzmanomyces_sp
OTU0155	MOSTABUND | n=33/23	0	0	0	9	24	UDB07229038	SH0953925.10FU	1.08251e-115	419.668	464	1	235	324	558	234	234	99.6	100	235	k__Fungi	p__Basidiomycota	c__Tremellomycetes	o__Filobasidiales	f__Piskurozymaceae	g__Solicoccozyma	s__Solicoccozyma_sp
OTU0156	MOSTABUND | n=32/23	7	1	8	7	9	UDB02747428	SH0960493.10FU	5.88747e-059	230.314	254	1	140	295	434	135	135	96.4	100	140	k__Fungi	p__Ascomycota	c__Eurotiomycetes	o__Eurotiomycetes_ord_Incertae_sedis	f__Eurotiomycetes_fam_Incertae_sedis	g__Eurotiomycetes_gen_Incertae_sedis	s__Eurotiomycetes_sp
OTU0157	MOSTABUND | n=32/14	0	0	0	19	13	OM743856	SH0777285.10FU	1.96551e-125	452.129	500	1	250	333	582	250	250	100	100	250	k__Fungi	p__Mortierellomycota	c__Mortierellomycetes	o__Mortierellales	f__Mortierellaceae	g__Mortierella	s__Mortierella_alpina
OTU0158	MOSTABUND | n=32/19	1	0	0	22	9	OW982423	SH0870090.10FU	3.90455e-088	327.696	362	1	181	399	579	181	181	100	100	181	k__Fungi	p__Ascomycota	c__Eurotiomycetes	o__Chaetothyriales	f__Cyphellophoraceae	g__Cyphellophora	s__Cyphellophora_reptans
OTU0159	MOSTABUND | n=32/14	7	3	22	0	0	UDB0525539	SH0924986.10FU	5.17414e-073	277.202	306	1	156	328	483	155	155	99.4	100	156	k__Fungi	p__Ascomycota	c__Dothideomycetes	o__Mytilinidiales	f__Mytilinidiaceae	g__Lophium	s__Lophium_sp
OTU0160	MOSTABUND | n=32/15	7	2	21	1	1	OR762723	SH0862152.10FU	1.45907e-073	279.005	308	1	154	320	473	154	154	100	100	154	k__Fungi	p__Ascomycota	c__Dothideomycetes	o__Pleosporales	f__Didymellaceae	g__Epicoccum	s__Epicoccum_nigrum
OTU0161	MOSTABUND | n=32/15	0	0	0	15	17	UDB02476120	SH0988621.10FU	5.38872e-113	410.651	454	1	227	278	504	227	227	100	100	227	k__Fungi	p__Basidiomycota	c__GS25	o__GS25_ord_Incertae_sedis	f__GS25_ord_Incertae_sedis_fam_Incertae_sedis	g__GS25_ord_Incertae_sedis_gen_Incertae_sedis	s__GS25_ord_Incertae_sedis_sp
OTU0162	MOSTABUND | n=31/10	10	9	12	0	0	MK801314	SH0950131.10FU	1.01457e-075	286.219	316	1	158	392	549	158	158	100	100	158	k__Fungi	p__Ascomycota	c__Xylonomycetes	o__Symbiotaphrinales	f__Symbiotaphrinaceae	g__Symbiotaphrina	s__Symbiotaphrina_microtheca
OTU0163	MOSTABUND | n=31/14	16	7	8	0	0
OTU0164	MOSTABUND | n=31/22	0	0	0	28	3	OW986340	SH0953899.10FU	3.70462e-115	417.864	462	1	231	367	597	231	231	100	100	231	k__Fungi	p__Basidiomycota	c__Tremellomycetes	o__Filobasidiales	f__Piskurozymaceae	g__Solicoccozyma	s__Solicoccozyma_terrea
OTU0165	MOSTABUND | n=30/28	0	0	0	8	22	UDB03250517	SH1008638.10FU	4.69413e-087	324.089	358	1	179	400	578	179	179	100	100	179	k__Fungi	p__Ascomycota	c__Dothideomycetes	o__Dothideomycetes_ord_Incertae_sedis	f__Dothideomycetes_fam_Incertae_sedis	g__Halokirschsteiniothelia	s__Halokirschsteiniothelia_sp
OTU0166	MOSTABUND | n=29/17	0	0	0	3	26	FR748137	SH0820237.10FU	5.03447e-120	434.095	480	1	240	329	568	240	240	100	100	240	k__Fungi	p__Basidiomycota	c__Agaricomycetes	o__Boletales	f__Sclerodermataceae	g__Pisolithus	s__Pisolithus_capsulifer
OTU0167	MOSTABUND | n=29/16	0	0	0	12	17	MT153680	SH0853071.10FU	1.62749e-086	322.286	356	1	178	349	526	178	178	100	100	178	k__Fungi	p__Ascomycota	c__Sordariomycetes	o__Hypocreales	f__Cordycipitaceae	g__Simplicillium	s__Simplicillium_minatense
OTU0168	MOSTABUND | n=28/25	0	0	0	1	27	FJ553854	SH0907949.10FU	1.55825e-066	255.561	282	1	146	1077	1222	144	144	98.6	100	146	k__Fungi	p__Ascomycota	c__Leotiomycetes	o__Helotiales	f__Helotiales_fam_Incertae_sedis	g__Leohumicola	s__Leohumicola_sp
OTU0169	MOSTABUND | n=28/25	0	0	0	18	10	UDB03381023	SH0748867.10FU	8.67994e-006	53.584	58	38	88	402	454	45	45	88.2	38.6	132	k__Fungi	p__Ascomycota	c__Eurotiomycetes	o__Chaetothyriales	f__Herpotrichiellaceae	g__Herpotrichiellaceae_gen_Incertae_sedis	s__Herpotrichiellaceae_sp
OTU0170	MOSTABUND | n=28/25	0	0	1	15	12	OR827162	SH0740100.10FU	8.45725e-077	289.825	320	1	160	364	523	160	160	100	100	160	k__Fungi	p__Ascomycota	c__Sordariomycetes	o__Hypocreales	f__Cordycipitaceae	g__Beauveria	s__Beauveria_pseudobassiana
OTU0171	MOSTABUND | n=28/17	10	6	12	0	0	FM173097	SH0974823.10FU	9.03685e-084	313.269	346	1	189	359	548	184	184	97.4	99.5	190	k__Fungi	p__Ascomycota	c__Eurotiomycetes	o__Chaetothyriales	f__Herpotrichiellaceae	g__Exophiala	s__Exophiala_sp
OTU0172	MOSTABUND | n=28/10	20	4	4	0	0	OR752061	SH0939958.10FU	4.89182e-080	300.646	332	1	166	365	530	166	166	100	100	166	k__Fungi	p__Ascomycota	c__Eurotiomycetes	o__Eurotiales	f__Aspergillaceae	g__Aspergillus	s__Aspergillus_tubingensis
OTU0173	MOSTABUND | n=27/5	9	7	11	0	0	MK050392	SH0964633.10FU	3.17853e-058	228.511	252	1	184	2085	2270	167	167	90.8	91.1	202	k__Fungi	p__Basidiomycota	c__Cystobasidiomycetes	o__Cystobasidiales	f__Cystobasidiales_fam_Incertae_sedis	g__Robertozyma	s__Robertozyma_ningxiaensis
OTU0174	MOSTABUND | n=27/18	13	6	8	0	0	UDB04579052	SH0896154.10FU	1.05322e-019	100.472	110	39	148	522	624	92	92	83.6	57	193	k__Fungi	p__Basidiomycota	c__Spiculogloeomycetes	o__Spiculogloeales	f__Spiculogloeaceae	g__Phyllozyma	s__Phyllozyma_sp
OTU0175	MOSTABUND | n=26/15	7	6	13	0	0	MW710662	SH0915545.10FU	8.1477e-084	313.269	346	1	173	331	503	173	173	100	100	173	k__Fungi	p__Ascomycota	c__Dothideomycetes	o__Dothideales	f__Zalariaceae	g__Zalaria	s__Zalaria_alba
OTU0176	MOSTABUND | n=26/12	12	4	10	0	0	UDB04160857	SH0939704.10FU	2.92934e-076	288.022	318	1	159	336	494	159	159	100	100	159	k__Fungi	p__Ascomycota	c__Eurotiomycetes	o__Eurotiales	f__Aspergillaceae	g__Penicillium	s__Penicillium_sp
OTU0177	MOSTABUND | n=26/4	7	4	15	0	0	KJ522801	SH0904731.10FU	1.30994e-094	349.336	386	1	197	365	562	197	197	100	100	197	k__Fungi	p__Ascomycota	c__Eurotiomycetes	o__Chaetothyriales	f__Herpotrichiellaceae	g__Exophiala	s__Exophiala_heteromorpha
OTU0178	MOSTABUND | n=26/12	8	7	11	0	0	GQ169320	SH0973416.10FU	3.39231e-082	307.859	340	1	170	347	516	170	170	100	100	170	k__Fungi	p__Ascomycota	c__Eurotiomycetes	o__Eurotiales	f__Trichocomaceae	g__Sagenomella	s__Sagenomella_griseoviridis
OTU0179	MOSTABUND | n=26/24	0	0	0	11	15	UDB0836532	SH0925692.10FU	5.87245e-079	297.039	328	1	164	288	451	164	164	100	100	164	k__Fungi	p__Ascomycota	c__Sordariomycetes	o__Hypocreales	f__Bionectriaceae	g__Acremonium	s__Acremonium_sp
OTU0180	MOSTABUND | n=25/7	6	8	11	0	0
OTU0181	MOSTABUND | n=25/13	0	0	0	11	14	PP034031	SH0940688.10FU	7.04812e-078	293.432	324	1	162	287	448	162	162	100	100	162	k__Fungi	p__Ascomycota	c__Eurotiomycetes	o__Eurotiales	f__Aspergillaceae	g__Penicillium	s__Penicillium_scabrosum
OTU0182	MOSTABUND | n=24/13	0	2	0	16	6	UDB07491272	SH1012233.10FU	1.04097e-068	262.775	290	1	145	315	459	145	145	100	100	145	k__Fungi	p__Ascomycota	c__Leotiomycetes	o__Helotiales	f__Dermateaceae	g__Xenochalara	s__Xenochalara_sp
OTU0183	MOSTABUND | n=24/18	0	0	0	3	21	KU579747	SH0959048.10FU	3.51376e-075	284.415	314	1	157	351	507	157	157	100	100	157	k__Fungi	p__Fungi_phy_Incertae_sedis	c__Fungi_cls_Incertae_sedis	o__Fungi_ord_Incertae_sedis	f__Fungi_fam_Incertae_sedis	g__Fungi_gen_Incertae_sedis	s__Fungi_sp
OTU0184	MOSTABUND | n=24/19	0	0	0	4	20	MN576831	SH0740173.10FU	7.04812e-078	293.432	324	1	162	392	553	162	162	100	100	162	k__Fungi	p__Ascomycota	c__Sordariomycetes	o__Hypocreales	f__Cordycipitaceae	g__Liangia	s__Liangia_sinensis
OTU0185	MOSTABUND | n=23/12	15	2	6	0	0
OTU0186	MOSTABUND | n=23/12	0	0	0	4	19	OU989417	SH0989897.10FU	9.36387e-090	333.106	368	1	184	363	546	184	184	100	100	184	k__Fungi	p__Ascomycota	c__Sordariomycetes	o__Hypocreales	f__Niessliaceae	g__Niesslia	s__Niesslia_tenuis
OTU0187	MOSTABUND | n=23/22	0	0	0	5	18	OK584620	SH0974672.10FU	4.07407e-081	304.252	336	1	168	338	505	168	168	100	100	168	k__Fungi	p__Ascomycota	c__Eurotiomycetes	o__Eurotiales	f__Trichocomaceae	g__Sagenomella	s__Sagenomella_verticillata
OTU0188	MOSTABUND | n=22/16	0	0	3	11	8	UDB04121108	SH0905534.10FU	5.18204e-061	237.528	262	1	174	367	535	160	160	92	100	174	k__Fungi	p__Ascomycota	c__Dothideomycetes	o__Coniosporiales	f__Coniosporiaceae	g__Coniosporium	s__Coniosporium_sp
OTU0189	MOSTABUND | n=22/10	7	4	4	1	6	MK212381	SH0763728.10FU	1.74907e-072	275.398	304	1	152	390	541	152	152	100	100	152	k__Fungi	p__Ascomycota	c__Ascomycota_cls_Incertae_sedis	o__Ascomycota_ord_Incertae_sedis	f__Ascomycota_fam_Incertae_sedis	g__Ascomycota_gen_Incertae_sedis	s__Ascomycota_sp
OTU0190	MOSTABUND | n=22/10	0	20	2	0	0	OQ717810	SH0843146.10FU	2.65617e-065	251.955	278	1	194	466	652	176	176	90.7	100	194	k__Fungi	p__Ascomycota	c__Eurotiomycetes	o__Mycocaliciales	f__Mycocaliciaceae	g__Chaenothecopsis	s__Chaenothecopsis_sp
OTU0191	MOSTABUND | n=21/19	0	0	0	4	17	UDB02365805	SH0946406.10FU	3.21368e-129	464.752	514	1	257	458	714	257	257	100	100	257	k__Fungi	p__Chytridiomycota	c__Spizellomycetes	o__Spizellomycetales	f__Spizellomycetaceae	g__Kochiomyces	s__Kochiomyces_sp
OTU0192	MOSTABUND | n=21/16	1	3	1	6	10	LC317582	SH0976373.10FU	1.12603e-088	329.499	364	1	182	382	563	182	182	100	100	182	k__Fungi	p__Ascomycota	c__Eurotiomycetes	o__Chaetothyriales	f__Herpotrichiellaceae	g__Exophiala	s__Exophiala_angulospora
OTU0193	MOSTABUND | n=21/5	0	0	0	9	12	OP321472	SH0940202.10FU	4.89182e-080	300.646	332	1	166	349	514	166	166	100	100	166	k__Fungi	p__Ascomycota	c__Eurotiomycetes	o__Eurotiales	f__Aspergillaceae	g__Penicillium	s__Penicillium_quebecense
OTU0194	MOSTABUND | n=21/9	2	15	4	0	0
OTU0195	MOSTABUND | n=20/9	7	3	10	0	0	OQ694453	SH0899106.10FU	6.7068e-061	237.528	262	1	216	442	651	186	186	86.1	99.1	218	k__Fungi	p__Basidiomycota	c__Agaricostilbomycetes	o__Agaricostilbales	f__Chionosphaeraceae	g__Chionosphaera	s__Chionosphaera_cuniculicola
OTU0196	MOSTABUND | n=20/15	0	0	0	13	7	UDB0780253	SH0884966.10FU	5.74279e-106	387.207	428	1	214	351	564	214	214	100	100	214	k__Fungi	p__Basidiomycota	c__Agaricomycetes	o__Agaricales	f__Clavariaceae	g__Clavaria	s__Clavaria_macounii
OTU0197	MOSTABUND | n=20/19	0	0	0	13	7	UDB05253053	SH1014240.10FU	3.49267e-076	288.022	318	1	184	262	445	174	174	94.6	100	184	k__Fungi	p__Glomeromycota	c__Glomeromycetes	o__Glomerales	f__Glomeraceae	g__Dominikia	s__Dominikia_sp
OTU0198	MOSTABUND | n=19/12	8	5	6	0	0	UDB019754	SH0885763.10FU	1.06239e-095	352.943	390	1	195	372	566	195	195	100	100	195	k__Fungi	p__Basidiomycota	c__Exobasidiomycetes	o__Exobasidiales	f__Brachybasidiaceae	g__Meira	s__Meira_sp
OTU0199	MOSTABUND | n=19/10	5	8	6	0	0	OW985768	SH0960075.10FU	1.21684e-074	282.612	312	1	156	362	517	156	156	100	100	156	k__Fungi	p__Ascomycota	c__Dothideomycetes	o__Pleosporales	f__Coniothyriaceae	g__Ochrocladosporium	s__Ochrocladosporium_elatum
OTU0200	MOSTABUND | n=18/18	0	0	0	10	8	UDB03250560	SH1008623.10FU	3.93099e-062	241.134	266	1	151	402	554	147	147	97.4	92.6	163	k__Fungi	p__Ascomycota	c__Dothideomycetes	o__Dothideomycetes_ord_Incertae_sedis	f__Dothideomycetes_fam_Incertae_sedis	g__Halokirschsteiniothelia	s__Halokirschsteiniothelia_sp
OTU0201	MOSTABUND | n=17/8	4	6	7	0	0	UDB0952376	SH0992164.10FU	1.00905e-025	120.309	132	2	162	301	468	130	130	80.7	92	175	k__Fungi	p__Basidiomycota	c__Agaricostilbomycetes	o__Agaricostilbales	f__Agaricostilbales_fam_Incertae_sedis	g__Agaricostilbales_gen_Incertae_sedis	s__Agaricostilbales_sp
OTU0202	MOSTABUND | n=17/9	0	0	0	16	1	UDB03534272	SH0949831.10FU	1.06239e-095	352.943	390	1	195	386	580	195	195	100	100	195	k__Fungi	p__Basidiomycota	c__Agaricomycetes	o__Hymenochaetales	f__Hymenochaetales_fam_Incertae_sedis	g__Hymenochaetales_gen_Incertae_sedis	s__Hymenochaetales_sp
OTU0203	MOSTABUND | n=17/5	9	5	3	0	0
OTU0204	MOSTABUND | n=17/15	0	0	0	2	15	UDB02236963	SH0996585.10FU	7.72212e-091	336.713	372	1	186	296	481	186	186	100	100	186	k__Fungi	p__Ascomycota	c__Sordariomycetes	o__Hypocreales	f__Cordycipitaceae	g__Isaria	s__Isaria_sp
OTU0205	MOSTABUND | n=17/9	3	3	7	2	2	OQ690209	SH0964714.10FU	1.03723e-089	333.106	368	1	202	324	525	195	195	96.5	100	202	k__Fungi	p__Basidiomycota	c__Cystobasidiomycetes	o__Cystobasidiales	f__Cystobasidiaceae	g__Cystobasidium	s__Cystobasidium_calyptogenae
OTU0206	MOSTABUND | n=17/11	0	0	0	6	11	UDB05253053	SH1014240.10FU	8.25222e-078	293.432	324	1	186	262	445	177	177	95.2	100	186	k__Fungi	p__Glomeromycota	c__Glomeromycetes	o__Glomerales	f__Glomeraceae	g__Dominikia	s__Dominikia_sp
OTU0207	MOSTABUND | n=17/11	0	0	0	10	7	HE775328	SH1013783.10FU	1.00067e-076	289.825	320	1	184	481	662	176	176	95.7	100	184	k__Fungi	p__Glomeromycota	c__Glomeromycetes	o__Glomerales	f__Glomeraceae	g__Glomeraceae_gen_Incertae_sedis	s__Glomeraceae_sp
OTU0208	MOSTABUND | n=17/15	0	0	0	17	0	UDB07629729	SH0953145.10FU	5.75675e-086	320.483	354	1	180	370	549	179	179	99.4	100	180	k__Fungi	p__Mucoromycota	c__Mucoromycetes	o__Mucorales	f__Mucoraceae	g__Zygorhynchus	s__Zygorhynchus_sp
OTU0209	MOSTABUND | n=16/10	0	0	0	6	10	UDB07159003	SH0742484.10FU	5.05708e-100	367.37	406	1	203	325	527	203	203	100	100	203	k__Fungi	p__Mucoromycota	c__Umbelopsidomycetes	o__Umbelopsidales	f__Umbelopsidaceae	g__Umbelopsis	s__Umbelopsis_sp
OTU0210	MOSTABUND | n=15/9	7	2	6	0	0	DQ870625	SH0880564.10FU	6.07483e-119	430.488	476	1	238	356	593	238	238	100	100	238	k__Fungi	p__Basidiomycota	c__Microbotryomycetes	o__Microbotryomycetes_ord_Incertae_sedis	f__Colacogloeaceae	g__Colacogloea	s__Colacogloea_subericola
OTU0211	MOSTABUND | n=15/3	4	0	11	0	0	MG707511	SH0974827.10FU	1.6811e-106	389.011	430	1	218	429	646	217	217	99.5	100	218	k__Fungi	p__Ascomycota	c__Eurotiomycetes	o__Chaetothyriales	f__Herpotrichiellaceae	g__Herpotrichiellaceae_gen_Incertae_sedis	s__Herpotrichiellaceae_sp
OTU0212	MOSTABUND | n=15/14	0	0	0	7	8	OR594143	SH1012793.10FU	1.23056e-101	372.78	412	1	209	473	681	208	208	99.5	100	209	k__Fungi	p__Basidiomycota	c__Agaricomycetes	o__Agaricales	f__Lycoperdaceae	g__Lycoperdon	s__Lycoperdon_dermoxanthum
OTU0213	MOSTABUND | n=15/10	0	0	0	11	4	UDB05324472	SH0830990.10FU	1.73602e-080	302.449	334	1	200	390	589	189	189	94.5	100	200	k__Fungi	p__Basidiomycota	c__Agaricomycetes	o__Agaricales	f__Entolomataceae	g__Entoloma	s__Entoloma_sp
OTU0214	MOSTABUND | n=15/14	0	0	0	8	7	OP895737	SH0754457.10FU	4.21375e-074	280.808	310	1	155	366	520	155	155	100	100	155	k__Fungi	p__Ascomycota	c__Sordariomycetes	o__Diaporthales	f__Diaporthaceae	g__Diaporthe	s__Diaporthe_columnaris
OTU0215	MOSTABUND | n=14/9	0	0	0	3	11	OR623074	SH0980625.10FU	3.00814e-069	264.578	292	1	146	284	429	146	146	100	100	146	k__Fungi	p__Ascomycota	c__Leotiomycetes	o__Thelebolales	f__Pseudeurotiaceae	g__Pseudogymnoascus	s__Pseudogymnoascus_sp
OTU0216	MOSTABUND | n=14/12	0	0	0	1	13	UDB01818193	SH0802823.10FU	2.14813e-071	271.792	300	1	153	375	527	152	152	99.3	100	153	k__Fungi	p__Ascomycota	c__Dothideomycetes	o__Mycosphaerellales	f__Mycosphaerellaceae	g__Mycosphaerellaceae_gen_Incertae_sedis	s__Mycosphaerellaceae_sp
OTU0217	MOSTABUND | n=14/8	5	3	6	0	0
OTU0218	MOSTABUND | n=14/9	6	3	5	0	0	KF780603	SH0838052.10FU	3.51376e-075	284.415	314	1	157	306	462	157	157	100	100	157	k__Fungi	p__Ascomycota	c__Sordariomycetes	o__Hypocreales	f__Hypocreales_fam_Incertae_sedis	g__Hypocreales_gen_Incertae_sedis	s__Hypocreales_sp
OTU0219	MOSTABUND | n=14/8	7	5	2	0	0	DQ494360	SH0965749.10FU	1.24559e-074	282.612	312	1	159	316	474	158	158	99.4	100	159	k__Fungi	p__Ascomycota	c__Orbiliomycetes	o__Orbiliales	f__Orbiliaceae	g__Dactylella	s__Dactylella_tenuis
OTU0220	MOSTABUND | n=14/7	4	4	6	0	0	HQ611336	SH0846888.10FU	2.51144e-070	268.185	296	1	148	296	443	148	148	100	100	148	k__Fungi	p__Mortierellomycota	c__Mortierellomycetes	o__Mortierellales	f__Mortierellales_fam_Incertae_sedis	g__Mortierellales_gen_Incertae_sedis	s__Mortierellales_sp
OTU0221	MOSTABUND | n=14/10	0	0	0	12	2	OW984010	SH1007825.10FU	5.87245e-079	297.039	328	1	164	388	551	164	164	100	100	164	k__Fungi	p__Ascomycota	c__Eurotiomycetes	o__Chaetothyriales	f__Chaetothyriales_fam_Incertae_sedis	g__Bacillicladium	s__Bacillicladium_lobatum
OTU0222	MOSTABUND | n=14/11	1	0	2	0	11	FJ028703	SH0763640.10FU	6.20413e-072	273.595	302	1	154	326	479	153	153	99.4	100	154	k__Fungi	p__Ascomycota	c__Dothideomycetes	o__Capnodiales	f__Capnodiales_fam_Incertae_sedis	g__Capnodiales_gen_Incertae_sedis	s__Capnodiales_sp
OTU0223	MOSTABUND | n=14/6	0	0	0	0	14	UDB04917042	SH0960692.10FU	2.86404e-123	444.915	492	1	246	302	547	246	246	100	100	246	k__Fungi	p__Mortierellomycota	c__Mortierellomycetes	o__Mortierellales	f__Mortierellaceae	g__Mortierella	s__Mortierella_sp
OTU0224	MOSTABUND | n=13/13	0	0	0	1	12	OR781401	SH0736021.10FU	7.04812e-078	293.432	324	1	162	331	492	162	162	100	100	162	k__Fungi	p__Ascomycota	c__Sordariomycetes	o__Hypocreales	f__Nectriaceae	g__Ilyonectria	s__Ilyonectria_destructans
OTU0225	MOSTABUND | n=13/13	0	0	0	7	6	KY096648	SH0870057.10FU	1.37014e-074	282.612	312	1	172	424	596	167	167	97.1	100	172	k__Fungi	p__Ascomycota	c__Eurotiomycetes	o__Chaetothyriales	f__Chaetothyriales_fam_Incertae_sedis	g__Chaetothyriales_gen_Incertae_sedis	s__Chaetothyriales_sp
OTU0226	MOSTABUND | n=13/9	0	0	0	1	12	OQ870725	SH0940622.10FU	4.89182e-080	300.646	332	1	166	338	503	166	166	100	100	166	k__Fungi	p__Ascomycota	c__Eurotiomycetes	o__Eurotiales	f__Aspergillaceae	g__Penicillium	s__Penicillium_melinii
OTU0227	MOSTABUND | n=13/7	5	4	4	0	0
OTU0228	MOSTABUND | n=13/12	0	0	0	6	7	UDB05253053	SH1014240.10FU	2.86696e-077	291.629	322	1	184	262	445	175	175	95.1	100	184	k__Fungi	p__Glomeromycota	c__Glomeromycetes	o__Glomerales	f__Glomeraceae	g__Dominikia	s__Dominikia_sp
OTU0229	MOSTABUND | n=13/7	11	1	1	0	0	UDB01766759	SH1001257.10FU	6.20413e-072	273.595	302	1	154	333	486	153	153	99.4	100	154	k__Fungi	p__Ascomycota	c__Eurotiomycetes	o__Chaetothyriales	f__Chaetothyriales_fam_Incertae_sedis	g__Chaetothyriales_gen_Incertae_sedis	s__Chaetothyriales_sp
OTU0230	MOSTABUND | n=12/5	0	0	0	12	0	KC180713	SH0989901.10FU	9.78808e-083	309.662	342	1	171	321	491	171	171	100	100	171	k__Fungi	p__Ascomycota	c__Sordariomycetes	o__Hypocreales	f__Hypocreales_fam_Incertae_sedis	g__Hypocreales_gen_Incertae_sedis	s__Hypocreales_sp
OTU0231	MOSTABUND | n=12/6	0	0	0	0	12	UDB05253053	SH1014240.10FU	1.06842e-082	309.662	342	1	184	262	445	179	179	97.3	100	184	k__Fungi	p__Glomeromycota	c__Glomeromycetes	o__Glomerales	f__Glomeraceae	g__Dominikia	s__Dominikia_sp
OTU0232	MOSTABUND | n=12/10	0	0	0	0	12	UDB06741266	SH0894143.10FU	8.60795e-065	250.151	276	1	181	276	456	166	166	91.7	100	181	k__Fungi	p__Basidiomycota	c__Tritirachiomycetes	o__Tritirachiales	f__Tritirachiaceae	g__Tritirachiaceae_gen_Incertae_sedis	s__Tritirachiaceae_sp
OTU0233	MOSTABUND | n=12/7	0	0	0	9	3	UDB07652486	SH0946487.10FU	5.38872e-113	410.651	454	1	227	367	593	227	227	100	100	227	k__Fungi	p__Basidiomycota	c__Agaricomycetes	o__Boletales	f__Suillaceae	g__Suillus	s__Suillus_sp
OTU0234	MOSTABUND | n=12/11	0	0	0	5	7	UDB01788258	SH1015620.10FU	6.55156e-072	273.595	302	1	161	356	515	158	158	98.1	100	161	k__Fungi	p__Ascomycota	c__Eurotiomycetes	o__Chaetothyriales	f__Chaetothyriales_fam_Incertae_sedis	g__Chaetothyriales_gen_Incertae_sedis	s__Chaetothyriales_sp
OTU0235	MOSTABUND | n=12/6	3	7	2	0	0	OQ717799	SH1009765.10FU	9.60368e-057	223.101	246	1	151	375	525	140	140	92.7	100	151	k__Fungi	p__Ascomycota	c__Coniocybomycetes	o__Coniocybales	f__Coniocybaceae	g__Chaenotheca	s__Chaenotheca_trichialis
OTU0236	MOSTABUND | n=12/7	0	0	0	9	3	UDB07128104	SH0742465.10FU	2.15033e-098	361.96	400	1	203	352	554	202	202	99.5	100	203	k__Fungi	p__Mucoromycota	c__Umbelopsidomycetes	o__Umbelopsidales	f__Umbelopsidaceae	g__Umbelopsis	s__Umbelopsis_sp
OTU0237	MOSTABUND | n=12/3	4	2	6	0	0	OP941495	SH0953911.10FU	2.65423e-104	381.797	422	2	230	309	537	222	222	96.9	99.6	230	k__Fungi	p__Basidiomycota	c__Tremellomycetes	o__Filobasidiales	f__Piskurozymaceae	g__Solicoccozyma	s__Solicoccozyma_sp
OTU0238	MOSTABUND | n=11/1	5	0	6	0	0	UDB05269281	SH0868848.10FU	4.64851e-074	280.808	310	1	168	393	560	163	163	97	100	168	k__Fungi	p__Ascomycota	c__Dothideomycetes	o__Dothideomycetes_ord_Incertae_sedis	f__Dothideomycetes_fam_Incertae_sedis	g__Dothideomycetes_gen_Incertae_sedis	s__Dothideomycetes_sp
OTU0239	MOSTABUND | n=11/11	0	0	0	5	6	GU726751	SH0736205.10FU	4.31408e-074	280.808	310	1	158	343	500	157	157	99.4	100	158	k__Fungi	p__Ascomycota	c__Sordariomycetes	o__Hypocreales	f__Nectriaceae	g__Pseudocosmospora	s__Pseudocosmospora_vilior
OTU0240	MOSTABUND | n=11/8	0	0	0	2	9	UDB02780757	SH0851901.10FU	6.62586e-065	250.151	276	1	146	318	463	143	143	97.9	100	146	k__Fungi	p__Ascomycota	c__Leotiomycetes	o__Helotiales	f__Helotiales_fam_Incertae_sedis	g__Leohumicola	s__Leohumicola_sp
OTU0241	MOSTABUND | n=11/6	0	0	0	7	4	UDB07492110	SH0970486.10FU	4.42631e-067	257.365	284	1	145	319	463	144	144	99.3	100	145	k__Fungi	p__Ascomycota	c__Leotiomycetes	o__Helotiales	f__Dermateaceae	g__Xenochalara	s__Xenochalara_sp
OTU0242	MOSTABUND | n=11/11	0	0	0	6	5	OQ429943	SH0925697.10FU	3.00814e-069	264.578	292	1	146	342	487	146	146	100	100	146	k__Fungi	p__Ascomycota	c__Sordariomycetes	o__Hypocreales	f__Bionectriaceae	g__Waltergamsia	s__Waltergamsia_moroccensis
OTU0243	MOSTABUND | n=11/7	3	2	6	0	0	MK782305	SH0850121.10FU	7.6859e-052	206.87	228	1	156	323	490	150	150	96.2	100	156	k__Fungi	p__Ascomycota	c__Saccharomycetes	o__Saccharomycetales	f__Saccharomycetales_fam_Incertae_sedis	g__Saccharomycetales_gen_Incertae_sedis	s__Saccharomycetales_sp
OTU0244	MOSTABUND | n=11/9	0	0	0	0	11	UDB05485259	SH0961412.10FU	5.38872e-113	410.651	454	1	227	363	589	227	227	100	100	227	k__Fungi	p__Basidiomycota	c__Agaricomycetes	o__Cantharellales	f__Ceratobasidiaceae	g__Thanatephorus	s__Thanatephorus_sp
OTU0245	MOSTABUND | n=11/5	4	1	6	0	0	OM980456	SH0964639.10FU	1.58628e-093	345.73	382	1	196	306	501	194	194	99	100	196	k__Fungi	p__Basidiomycota	c__Cystobasidiomycetes	o__Cystobasidiomycetes_ord_Incertae_sedis	f__Microsporomycetaceae	g__Microsporomyces	s__Microsporomyces_sp
OTU0246	MOSTABUND | n=11/11	0	0	0	1	10	UDB07675232	SH0740148.10FU	7.04812e-078	293.432	324	1	162	316	477	162	162	100	100	162	k__Fungi	p__Ascomycota	c__Sordariomycetes	o__Hypocreales	f__Cordycipitaceae	g__Lecanicillium	s__Lecanicillium_sp
OTU0247	MOSTABUND | n=10/10	0	0	0	5	5	JX042979	SH0974814.10FU	2.22661e-091	338.516	374	1	187	401	587	187	187	100	100	187	k__Fungi	p__Ascomycota	c__Eurotiomycetes	o__Chaetothyriales	f__Herpotrichiellaceae	g__Capronia	s__Capronia_sp
OTU0248	MOSTABUND | n=10/9	0	0	0	10	0	UDB05154220	SH0908094.10FU	1.24629e-067	259.168	286	1	143	317	459	143	143	100	100	143	k__Fungi	p__Ascomycota	c__Leotiomycetes	o__Helotiales	f__Helotiales_fam_Incertae_sedis	g__Polyphilus	s__Polyphilus_sp
OTU0249	MOSTABUND | n=10/5	0	0	0	10	0	UDB02870032	SH0990916.10FU	1.8713e-112	408.848	452	1	226	335	560	226	226	100	100	226	k__Fungi	p__Basidiomycota	c__Geminibasidiomycetes	o__Geminibasidiales	f__Geminibasidiaceae	g__Geminibasidium	s__Geminibasidium_sp
OTU0250	MOSTABUND | n=10/4	6	2	2	0	0	MN833924	SH0958691.10FU	3.85599e-049	197.854	218	1	152	263	414	137	137	90.1	100	152	k__Fungi	p__Basidiomycota	c__Tremellomycetes	o__Filobasidiales	f__Filobasidiaceae	g__Filobasidium	s__Filobasidium_sp
OTU0251	MOSTABUND | n=10/9	0	0	0	8	2	UDB02060356	SH0871195.10FU	1.17564e-081	306.056	338	1	169	338	506	169	169	100	100	169	k__Fungi	p__Ascomycota	c__Eurotiomycetes	o__Eurotiales	f__Aspergillaceae	g__Neosartorya	s__Neosartorya_sp
OTU0252	MOSTABUND | n=10/6	2	4	4	0	0	KF274277	SH0881288.10FU	5.05192e-073	277.202	306	1	153	345	497	153	153	100	100	153	k__Fungi	p__Basidiomycota	c__Tremellomycetes	o__Tremellales	f__Tremellales_fam_Incertae_sedis	g__Tremellales_gen_Incertae_sedis	s__Tremellales_sp
OTU0253	MOSTABUND | n=10/5	3	3	4	0	0
OTU0254	MOSTABUND | n=10/1	3	2	5	0	0	UDB01377483	SH1043674.10FU	5.76101e-020	100.472	110	5	99	266	367	86	86	90.5	80.5	118	k__Fungi	p__Ascomycota	c__Ascomycota_cls_Incertae_sedis	o__Ascomycota_ord_Incertae_sedis	f__Ascomycota_fam_Incertae_sedis	g__Ascomycota_gen_Incertae_sedis	s__Ascomycota_sp
OTU0255	MOSTABUND | n=10/5	0	0	0	0	10	OR825614	SH1004014.10FU	4.1991e-101	370.977	410	1	205	451	655	205	205	100	100	205	k__Fungi	p__Basidiomycota	c__Agaricomycetes	o__Agaricales	f__Psathyrellaceae	g__Candolleomyces	s__Candolleomyces_candolleanus
OTU0256	MOSTABUND | n=9/6	4	4	1	0	0
OTU0257	MOSTABUND | n=9/1	4	0	5	0	0	MT470200	SH0746904.10FU	3.8438e-058	228.511	252	1	232	288	506	192	192	82.8	97.5	238	k__Fungi	p__Basidiomycota	c__Microbotryomycetes	o__Microbotryomycetes_ord_Incertae_sedis	f__Colacogloeaceae	g__Colacogloea	s__Colacogloea_sp
OTU0258	MOSTABUND | n=9/9	0	0	0	0	9	LC739052	SH0970638.10FU	3.06224e-096	354.747	392	1	196	352	547	196	196	100	100	196	k__Fungi	p__Ascomycota	c__Sordariomycetes	o__Microascales	f__Microascaceae	g__Scedosporium	s__Scedosporium_minutisporum
OTU0259	MOSTABUND | n=9/5	0	0	0	2	7	PP049975	SH1020079.10FU	8.45725e-077	289.825	320	1	160	266	425	160	160	100	100	160	k__Fungi	p__Basidiomycota	c__Tremellomycetes	o__Tremellales	f__Trimorphomycetaceae	g__Saitozyma	s__Saitozyma_podzolica
OTU0260	MOSTABUND | n=9/5	5	1	3	0	0	MZ503735	SH0985059.10FU	1.20994e-101	372.78	412	1	206	502	707	206	206	100	100	206	k__Fungi	p__Ascomycota	c__Dothideomycetes	o__Venturiales	f__Sympoventuriaceae	g__Scolecobasidium	s__Scolecobasidium_globale
OTU0261	MOSTABUND | n=9/3	4	2	3	0	0	OR623243	SH0958738.10FU	6.84936e-072	273.595	302	1	167	289	451	162	162	97	100	167	k__Fungi	p__Ascomycota	c__Saccharomycetes	o__Saccharomycetales	f__Trichomonascaceae	g__Blastobotrys	s__Blastobotrys_sp
OTU0262	MOSTABUND | n=9/5	0	2	2	4	1	OR761551	SH0887053.10FU	1.5385e-093	345.73	382	1	191	356	546	191	191	100	100	191	k__Fungi	p__Ascomycota	c__Saccharomycetes	o__Saccharomycetales	f__Debaryomycetaceae	g__Meyerozyma	s__Meyerozyma_guilliermondii
OTU0263	MOSTABUND | n=9/9	0	0	0	0	9	UDB06497557	SH0873617.10FU	2.7241e-092	342.123	378	1	264	475	734	239	239	90.5	100	264	k__Fungi	p__Basidiomycota	c__Agaricomycetes	o__Boletales	f__Rhizopogonaceae	g__Rhizopogon	s__Rhizopogon_sp
OTU0264	MOSTABUND | n=9/5	2	0	2	3	2	OQ526191	SH1020519.10FU	1.58558e-041	172.606	190	3	144	372	514	127	127	89.4	91	156	k__Fungi	p__Ascomycota	c__Dothideomycetes	o__Dothideomycetes_ord_Incertae_sedis	f__Dothideomycetes_fam_Incertae_sedis	g__Dothideomycetes_gen_Incertae_sedis	s__Dothideomycetes_sp
OTU0265	MOSTABUND | n=9/9	0	0	0	9	0	KU579763	SH1041804.10FU	4.99894e-080	300.646	332	1	169	407	575	168	168	99.4	100	169	k__Fungi	p__Fungi_phy_Incertae_sedis	c__Fungi_cls_Incertae_sedis	o__Fungi_ord_Incertae_sedis	f__Fungi_fam_Incertae_sedis	g__Fungi_gen_Incertae_sedis	s__Fungi_sp
OTU0266	MOSTABUND | n=9/8	0	0	0	2	7	MK782423	SH1011291.10FU	6.78093e-085	316.876	350	1	175	345	519	175	175	100	100	175	k__Fungi	p__Ascomycota	c__Sordariomycetes	o__Hypocreales	f__Niessliaceae	g__Eucasphaeria	s__Eucasphaeria_capensis
OTU0267	MOSTABUND | n=8/1	4	1	3	0	0	GU062229	SH0926075.10FU	2.80662e-117	425.078	470	1	252	308	561	247	247	98	98.4	256	k__Fungi	p__Basidiomycota	c__Basidiomycota_cls_Incertae_sedis	o__Basidiomycota_ord_Incertae_sedis	f__Basidiomycota_fam_Incertae_sedis	g__Basidiomycota_gen_Incertae_sedis	s__Basidiomycota_sp
OTU0268	MOSTABUND | n=8/3	4	4	0	0	0	KF360374	SH0737973.10FU	8.69287e-064	246.544	272	1	143	317	459	140	140	97.9	92.3	155	k__Fungi	p__Ascomycota	c__Lecanoromycetes	o__Umbilicariales	f__Elixiaceae	g__Elixia	s__Elixia_sp
OTU0269	MOSTABUND | n=8/7	0	0	0	8	0	UDB05056224	SH0994775.10FU	5.15992e-066	253.758	280	1	140	315	454	140	140	100	100	140	k__Fungi	p__Ascomycota	c__Dothideomycetes	o__Dothideomycetes_ord_Incertae_sedis	f__Dothideomycetes_fam_Incertae_sedis	g__Dothideomycetes_gen_Incertae_sedis	s__Dothideomycetes_sp
OTU0270	MOSTABUND | n=8/7	0	0	0	1	7	OK631735	SH0980658.10FU	9.78808e-083	309.662	342	1	171	435	605	171	171	100	100	171	k__Fungi	p__Ascomycota	c__Eurotiomycetes	o__Onygenales	f__Arthrodermataceae	g__Arthroderma	s__Arthroderma_mcgillisianum
OTU0271	MOSTABUND | n=8/2	0	0	8	0	0	AB597207	SH0924978.10FU	2.49703e-077	291.629	322	1	164	406	569	163	163	99.4	100	164	k__Fungi	p__Ascomycota	c__Dothideomycetes	o__Tubeufiales	f__Tubeufiaceae	g__Helicoma	s__Helicoma_isiola
OTU0272	MOSTABUND | n=8/7	0	0	0	2	6	UDB03409381	SH0742514.10FU	7.04812e-078	293.432	324	1	162	303	464	162	162	100	100	162	k__Fungi	p__Ascomycota	c__Pezizomycotina_cls_Incertae_sedis	o__Pezizomycotina_ord_Incertae_sedis	f__Pezizomycotina_fam_Incertae_sedis	g__Hormiactis	s__Hormiactis_sp
OTU0273	MOSTABUND | n=8/2	2	4	2	0	0	UDB01788704	SH0944887.10FU	2.2694e-071	271.792	300	1	160	334	493	156	156	97.5	100	160	k__Fungi	p__Ascomycota	c__Eurotiomycetes	o__Chaetothyriales	f__Chaetothyriales_fam_Incertae_sedis	g__Chaetothyriales_gen_Incertae_sedis	s__Chaetothyriales_sp
OTU0274	MOSTABUND | n=8/4	1	0	7	0	0	OQ717833	SH0737946.10FU	5.44226e-060	233.921	258	1	154	375	528	144	144	93.5	100	154	k__Fungi	p__Ascomycota	c__Lecanoromycetes	o__Umbilicariales	f__Elixiaceae	g__Elixia	s__Elixia_flexella
OTU0275	MOSTABUND | n=8/5	0	0	0	0	8	OM951659	SH0999786.10FU	2.0399e-138	495.409	548	1	274	380	653	274	274	100	100	274	k__Fungi	p__Basidiomycota	c__Malasseziomycetes	o__Malasseziales	f__Malasseziaceae	g__Malassezia	s__Malassezia_restricta
OTU0276	MOSTABUND | n=8/6	0	0	0	5	3	UDB01245775	SH0845138.10FU	7.43725e-071	269.988	298	1	149	309	457	149	149	100	98	152	k__Fungi	p__Ascomycota	c__Sordariomycetes	o__Sordariales	f__Neoschizotheciaceae	g__Apodus	s__Apodus_sp
OTU0277	MOSTABUND | n=8/4	0	0	0	7	1	AB986451	SH0897050.10FU	4.14563e-061	237.528	262	3	145	689	829	139	139	97.2	98.6	145	k__Fungi	p__Ascomycota	c__Leotiomycetes	o__Helotiales	f__Helotiales_fam_Incertae_sedis	g__Helotiales_gen_Incertae_sedis	s__Helotiales_sp
OTU0278	MOSTABUND | n=7/5	0	0	0	3	4	UDB0599694	SH0978416.10FU	6.05523e-072	273.595	302	1	151	327	477	151	151	100	100	151	k__Fungi	p__Ascomycota	c__Sordariomycetes	o__Sordariales	f__Chaetomiaceae	g__Humicola	s__Humicola_sp
OTU0279	MOSTABUND | n=7/3	0	2	2	3	0	KM014588	SH0964652.10FU	1.6245e-093	345.73	382	1	200	283	483	198	198	99	100	200	k__Fungi	p__Basidiomycota	c__Cystobasidiomycetes	o__Cystobasidiales	f__Cystobasidiaceae	g__Cystobasidium	s__Cystobasidium_minutum
OTU0280	MOSTABUND | n=7/6	0	0	0	1	6	UDB0836527	SH0925692.10FU	4.04833e-062	241.134	266	1	167	286	450	155	155	92.8	100	167	k__Fungi	p__Ascomycota	c__Sordariomycetes	o__Hypocreales	f__Bionectriaceae	g__Acremonium	s__Acremonium_sp
OTU0281	MOSTABUND | n=7/4	0	2	5	0	0	UDB06553245	SH0965184.10FU	2.14813e-071	271.792	300	1	153	328	480	152	152	99.3	100	153	k__Fungi	p__Ascomycota	c__Sareomycetes	o__Sareales	f__Sareaceae	g__Sarea	s__Sarea_sp
OTU0282	MOSTABUND | n=7/5	3	0	4	0	0	OR623240	SH0841251.10FU	9.65814e-084	313.269	346	1	201	263	462	193	193	96	100	201	k__Fungi	p__Basidiomycota	c__Agaricostilbomycetes	o__Agaricostilbales	f__Chionosphaeraceae	g__Kurtzmanomyces	s__Kurtzmanomyces_sp
OTU0283	MOSTABUND | n=7/7	7	0	0	0	0	OR378530	SH0856167.10FU	3.39231e-082	307.859	340	1	170	312	481	170	170	100	100	170	k__Fungi	p__Basidiomycota	c__Tremellomycetes	o__Trichosporonales	f__Trichosporonaceae	g__Trichosporon	s__Trichosporon_sp
OTU0284	MOSTABUND | n=7/6	0	0	0	0	7	UDB05254388	SH1014041.10FU	3.98514e-069	264.578	292	1	183	250	434	171	171	93.4	99.5	184	k__Fungi	p__Glomeromycota	c__Glomeromycetes	o__Glomerales	f__Glomeraceae	g__Dominikia	s__Dominikia_sp
OTU0285	MOSTABUND | n=7/1	4	1	2	0	0	UDB03609281	SH1012176.10FU	1.53162e-066	255.561	282	1	144	317	460	143	143	99.3	100	144	k__Fungi	p__Ascomycota	c__Leotiomycetes	o__Helotiales	f__Helotiales_fam_Incertae_sedis	g__Infundichalara	s__Infundichalara_sp
OTU0286	MOSTABUND | n=7/7	0	0	0	7	0	UDB07382175	SH0927149.10FU	7.92338e-092	340.32	376	1	225	428	651	211	211	93.8	100	225	k__Fungi	p__Chytridiomycota	c__Spizellomycetes	o__Spizellomycetales	f__Spizellomycetales_fam_Incertae_sedis	g__Spizellomycetales_gen_Incertae_sedis	s__Spizellomycetales_sp
OTU0287	MOSTABUND | n=7/6	0	0	0	5	2	UDB02355178	SH0905492.10FU	2.44154e-077	291.629	322	1	161	360	520	161	161	100	100	161	k__Fungi	p__Ascomycota	c__Eurotiomycetes	o__Chaetothyriales	f__Trichomeriaceae	g__Knufia	s__Knufia_sp
OTU0288	MOSTABUND | n=7/4	4	1	1	1	0	OR769498	SH0925964.10FU	1.45907e-073	279.005	308	1	154	394	547	154	154	100	100	154	k__Fungi	p__Ascomycota	c__Dothideomycetes	o__Dothideales	f__Saccotheciaceae	g__Aureobasidium	s__Aureobasidium_pullulans
OTU0289	MOSTABUND | n=6/1	0	2	4	0	0	UDB0754280	SH0867027.10FU	3.31774e-045	185.23	204	1	198	282	479	164	164	82.8	100	198	k__Fungi	p__Basidiomycota	c__Pucciniomycetes	o__Platygloeales	f__Platygloeaceae	g__Platygloea	s__Platygloea_disciformis
OTU0290	MOSTABUND | n=6/6	0	0	0	5	1	LT964664	SH0977636.10FU	1.61295e-047	192.443	212	1	139	313	450	129	129	92.8	92.7	150	k__Fungi	p__Ascomycota	c__Leotiomycetes	o__Helotiales	f__Myxotrichaceae	g__Skoua	s__Skoua_sp
OTU0291	MOSTABUND | n=6/3	3	2	1	0	0	MK050392	SH0964633.10FU	1.64652e-055	219.494	242	1	184	2085	2270	165	165	89.7	91.1	202	k__Fungi	p__Basidiomycota	c__Cystobasidiomycetes	o__Cystobasidiales	f__Cystobasidiales_fam_Incertae_sedis	g__Robertozyma	s__Robertozyma_ningxiaensis
OTU0292	MOSTABUND | n=6/1	1	0	5	0	0	UDB02020736	SH0843027.10FU	1.55825e-066	255.561	282	1	146	305	450	144	144	98.6	100	146	k__Fungi	p__Ascomycota	c__Dothideomycetes	o__Mycosphaerellales	f__Teratosphaeriaceae	g__Neocatenulostroma	s__Neocatenulostroma_sp
OTU0293	MOSTABUND | n=6/4	0	0	0	5	1	OR900529	SH0777285.10FU	6.82913e-125	450.325	498	1	249	479	727	249	249	100	100	249	k__Fungi	p__Mortierellomycota	c__Mortierellomycetes	o__Mortierellales	f__Mortierellaceae	g__Linnemannia	s__Linnemannia_amoeboidea
OTU0294	MOSTABUND | n=6/3	3	2	1	0	0	JN053509	SH0847499.10FU	3.24047e-097	358.353	396	1	244	343	585	231	231	94.7	100	244	k__Fungi	p__Basidiomycota	c__Tremellomycetes	o__Filobasidiales	f__Filobasidiaceae	g__Syzygospora	s__Syzygospora_alba
OTU0295	MOSTABUND | n=6/6	0	0	0	6	0	UDB06376966	SH0964393.10FU	6.43149e-086	320.483	354	1	199	271	473	194	194	97.5	100	199	k__Fungi	p__Glomeromycota	c__Glomeromycetes	o__Glomerales	f__Glomeraceae	g__Rhizophagus	s__Rhizophagus_sp
OTU0296	MOSTABUND | n=6/5	0	0	0	2	4	OR824706	SH0889625.10FU	2.894e-103	378.19	418	1	209	443	651	209	209	100	100	209	k__Fungi	p__Basidiomycota	c__Agaricomycetes	o__Agaricales	f__Strophariaceae	g__Hypholoma	s__Hypholoma_fasciculare
OTU0297	MOSTABUND | n=6/4	0	0	0	2	4	FJ664877	SH0733110.10FU	7.67911e-071	269.988	298	1	156	615	769	154	154	98.7	100	156	k__Fungi	p__Ascomycota	c__Eurotiomycetes	o__Verrucariales	f__Verrucariaceae	g__Verrucaria	s__Verrucaria_nigrescens
OTU0298	MOSTABUND | n=6/5	3	1	2	0	0	UDB0952315	SH0992159.10FU	2.14233e-047	192.443	212	31	176	308	452	131	131	89.7	76.4	191	k__Fungi	p__Basidiomycota	c__Agaricostilbomycetes	o__Agaricostilbales	f__Agaricostilbales_fam_Incertae_sedis	g__Agaricostilbales_gen_Incertae_sedis	s__Agaricostilbales_sp
OTU0299	MOSTABUND | n=6/6	0	0	0	4	2	UDB06356957	SH0915413.10FU	1.41176e-080	302.449	334	1	167	343	509	167	167	100	100	167	k__Fungi	p__Ascomycota	c__Eurotiomycetes	o__Chaetothyriales	f__Herpotrichiellaceae	g__Rhinocladiella	s__Rhinocladiella_sp
OTU0300	MOSTABUND | n=6/1	0	3	3	0	0	KJ706356	SH0946266.10FU	3.48622e-102	374.584	414	1	207	366	572	207	207	100	100	207	k__Fungi	p__Basidiomycota	c__Microbotryomycetes	o__Microbotryomycetes_ord_Incertae_sedis	f__Chrysozymaceae	g__Hamamotoa	s__Hamamotoa_singularis
OTU0301	MOSTABUND | n=6/3	2	1	3	0	0	UDB03001082	SH0854813.10FU	8.97263e-014	80.6345	88	48	177	309	434	100	100	76.9	73.4	177	k__Fungi	p__Basidiomycota	c__Tremellomycetes	o__Tremellales	f__Rhynchogastremaceae	g__Papiliotrema	s__Papiliotrema_sp
OTU0302	MOSTABUND | n=6/1	4	2	0	0	0	UDB03610486	SH1012176.10FU	7.93397e-064	246.544	272	1	144	317	460	141	141	97.9	100	144	k__Fungi	p__Ascomycota	c__Leotiomycetes	o__Helotiales	f__Helotiales_fam_Incertae_sedis	g__Infundichalara	s__Infundichalara_sp
OTU0303	MOSTABUND | n=6/6	0	0	0	2	4	UDB01618550	SH1000650.10FU	8.45725e-077	289.825	320	1	160	304	463	160	160	100	100	160	k__Fungi	p__Ascomycota	c__Dothideomycetes	o__Capnodiales	f__Capnodiales_fam_Incertae_sedis	g__Capnodiales_gen_Incertae_sedis	s__Capnodiales_sp
OTU0304	MOSTABUND | n=6/3	3	2	1	0	0	OQ448344	SH0964621.10FU	6.08957e-099	363.763	402	1	201	318	518	201	201	100	100	201	k__Fungi	p__Basidiomycota	c__Cystobasidiomycetes	o__Cystobasidiales	f__Cystobasidiaceae	g__Cystobasidium	s__Cystobasidium_laryngis
OTU0305	MOSTABUND | n=6/2	1	1	4	0	0	MT872624	SH0912804.10FU	2.09801e-052	208.674	230	1	150	578	729	139	139	92.7	100	150	k__Fungi	p__Ascomycota	c__Eurotiomycetes	o__Eurotiomycetes_ord_Incertae_sedis	f__Eurotiomycetes_fam_Incertae_sedis	g__Eurotiomycetes_gen_Incertae_sedis	s__Eurotiomycetes_sp
OTU0306	MOSTABUND | n=6/6	0	0	0	5	1	UDB01409054	SH1024250.10FU	1.69495e-079	298.842	330	1	165	316	480	165	165	100	100	165	k__Fungi	p__Ascomycota	c__Sordariomycetes	o__Xylariales	f__Xylariaceae	g__Ascotricha	s__Ascotricha_sp
OTU0307	MOSTABUND | n=6/4	0	0	0	0	6	OK584615	SH0903004.10FU	1.45725e-100	369.174	408	1	204	230	433	204	204	100	100	204	k__Fungi	p__Ascomycota	c__Saccharomycetes	o__Saccharomycetes_ord_Incertae_sedis	f__Saccharomycetes_fam_Incertae_sedis	g__Saccharomycetes_gen_Incertae_sedis	s__Saccharomycetes_sp
OTU0308	MOSTABUND | n=6/5	0	0	0	2	4	MW215223	SH0953734.10FU	4.58051e-114	414.258	458	1	234	394	627	232	232	99.1	100	234	k__Fungi	p__Fungi_phy_Incertae_sedis	c__Fungi_cls_Incertae_sedis	o__Fungi_ord_Incertae_sedis	f__Fungi_fam_Incertae_sedis	g__Fungi_gen_Incertae_sedis	s__Fungi_sp
OTU0309	MOSTABUND | n=5/1	1	2	2	0	0	UDB02013834	SH0904555.10FU	1.7156e-080	302.449	334	1	195	361	557	187	187	95.9	98.5	198	k__Fungi	p__Ascomycota	c__Eurotiomycetes	o__Chaetothyriales	f__Herpotrichiellaceae	g__Exophiala	s__Exophiala_sp
OTU0310	MOSTABUND | n=5/5	0	0	0	1	4	UDB05058932	SH0959893.10FU	3.93121e-061	237.528	262	1	139	287	425	136	136	97.8	100	139	k__Fungi	p__Ascomycota	c__Leotiomycetes	o__Helotiales	f__Pleuroascaceae	g__Pleuroascaceae_gen_Incertae_sedis	s__Pleuroascaceae_sp
OTU0311	MOSTABUND | n=5/2	0	0	0	5	0	EU497961	SH0939544.10FU	1.89127e-072	275.398	304	1	162	387	548	158	158	97.5	100	162	k__Fungi	p__Ascomycota	c__Eurotiomycetes	o__Eurotiales	f__Aspergillaceae	g__Penicillium	s__Penicillium_sp
OTU0312	MOSTABUND | n=5/4	0	0	0	1	4	UDB06909489	SH0931150.10FU	6.05523e-072	273.595	302	1	151	322	472	151	151	100	100	151	k__Fungi	p__Ascomycota	c__Leotiomycetes	o__Leotiales	f__Tympanidaceae	g__Tympanidaceae_gen_Incertae_sedis	s__Tympanidaceae_sp
OTU0313	MOSTABUND | n=5/4	0	0	0	1	4	UDB06912072	SH0945481.10FU	2.046e-052	208.674	230	1	146	326	474	138	138	94.5	99.3	147	k__Fungi	p__Ascomycota	c__Leotiomycetes	o__Leotiales	f__Tympanidaceae	g__Tympanidaceae_gen_Incertae_sedis	s__Tympanidaceae_sp
OTU0314	MOSTABUND | n=5/5	0	0	0	2	3	OP932999	SH0777285.10FU	3.88057e-128	461.145	510	1	255	370	624	255	255	100	100	255	k__Fungi	p__Mortierellomycota	c__Mortierellomycetes	o__Mortierellales	f__Mortierellaceae	g__Mortierella	s__Mortierella_sp
OTU0315	MOSTABUND | n=5/4	0	0	0	4	1	UDB04221318	SH0809971.10FU	8.69211e-070	266.382	294	1	147	311	457	147	147	100	100	147	k__Fungi	p__Ascomycota	c__Leotiomycetes	o__Helotiales	f__Mollisiaceae	g__Mollisia	s__Mollisia_sp
OTU0316	MOSTABUND | n=5/2	0	0	0	3	2	OR458371	SH0923846.10FU	1.39083e-056	223.101	246	3	187	283	458	162	162	87.6	89.4	207	k__Fungi	p__Ascomycota	c__Sordariomycetes	o__Conioscyphales	f__Conioscyphaceae	g__Conioscypha	s__Conioscypha_sp
OTU0317	MOSTABUND | n=5/4	0	0	0	1	4	OR473061	SH0963782.10FU	3.00814e-069	264.578	292	1	146	385	530	146	146	100	100	146	k__Fungi	p__Ascomycota	c__Leotiomycetes	o__Thelebolales	f__Pseudeurotiaceae	g__Geomyces	s__Geomyces_asperulatus
OTU0318	MOSTABUND | n=5/3	0	0	0	4	1
OTU0319	MOSTABUND | n=5/5	0	0	0	5	0	UDB07558557	SH0789747.10FU	7.02228e-065	250.151	276	1	153	302	453	148	148	96.7	100	153	k__Fungi	p__Ascomycota	c__Dothideomycetes	o__Pleosporales	f__Sporormiaceae	g__Sporormiella	s__Sporormiella_sp
OTU0320	MOSTABUND | n=5/3	0	0	0	1	4	KC222698	SH0946126.10FU	9.41341e-063	242.938	268	1	139	374	512	137	137	98.6	98.6	141	k__Fungi	p__Ascomycota	c__Leotiomycetes	o__Helotiales	f__Myxotrichaceae	g__Oidiodendron	s__Oidiodendron_sp
OTU0321	MOSTABUND | n=5/4	0	0	0	3	2	MZ771286	SH0790038.10FU	1.74907e-072	275.398	304	1	152	315	466	152	152	100	100	152	k__Fungi	p__Ascomycota	c__Dothideomycetes	o__Pleosporales	f__Sporormiaceae	g__Preussia	s__Preussia_typharum
OTU0322	MOSTABUND | n=5/5	1	0	4	0	0	KF156038	SH0735104.10FU	1.82085e-086	322.286	356	1	178	447	624	178	178	100	90.4	197	k__Fungi	p__Ascomycota	c__Dothideomycetes	o__Venturiales	f__Sympoventuriaceae	g__Ochroconis	s__Ochroconis_longiphorum
OTU0323	MOSTABUND | n=5/1	1	1	3	0	0	UDB07650091	SH0948279.10FU	2.86949e-058	228.511	252	2	183	291	458	163	163	89.6	98.9	184	k__Fungi	p__Ascomycota	c__Saccharomycetes	o__Saccharomycetales	f__Trichomonascaceae	g__Sugiyamaella	s__Sugiyamaella_sp
OTU0324	MOSTABUND | n=5/4	0	0	0	3	2	OL711865	SH0903398.10FU	2.82408e-083	311.466	344	1	172	500	671	172	172	100	100	172	k__Fungi	p__Ascomycota	c__Eurotiomycetes	o__Eurotiales	f__Aspergillaceae	g__Aspergillus	s__Aspergillus_sp
OTU0325	MOSTABUND | n=5/5	0	0	0	2	3	UDB01587901	SH1004835.10FU	1.25039e-134	482.786	534	1	267	343	609	267	267	100	100	267	k__Fungi	p__Calcarisporiellomycota	c__Calcarisporiellomycetes	o__Calcarisporiellales	f__Calcarisporiellaceae	g__Calcarisporiella	s__Calcarisporiella_sp
OTU0326	MOSTABUND | n=5/4	0	0	0	0	5	UDB03083452	SH0857720.10FU	4.46824e-114	414.258	458	1	229	416	644	229	229	100	100	229	k__Fungi	p__Basidiomycota	c__Agaricomycetes	o__Agaricales	f__Stephanosporaceae	g__Lindtneria	s__Lindtneria_sp
OTU0327	MOSTABUND | n=5/5	0	0	0	0	5	UDB05070554	SH1000422.10FU	9.36387e-090	333.106	368	1	184	411	594	184	184	100	100	184	k__Fungi	p__Basidiomycota	c__Agaricomycetes	o__Agaricales	f__Pluteaceae	g__Pluteus	s__Pluteus_sp
OTU0328	MOSTABUND | n=5/5	0	0	0	3	2	UDB03882741	SH0912403.10FU	3.24723e-089	331.303	366	1	183	329	511	183	183	100	100	183	k__Fungi	p__Ascomycota	c__Sordariomycetes	o__Hypocreales	f__Clavicipitaceae	g__Metacordyceps	s__Metacordyceps_sp
OTU0329	MOSTABUND | n=5/1	0	0	0	4	1	MT153618	SH0990486.10FU	1.03817e-075	286.219	316	1	161	320	480	160	160	99.4	100	161	k__Fungi	p__Ascomycota	c__Sordariomycetes	o__Hypocreales	f__Bionectriaceae	g__Acremonium	s__Acremonium_sp
OTU0330	MOSTABUND | n=5/4	1	2	2	0	0	KM104151	SH0907363.10FU	2.88038e-084	315.072	348	1	205	390	594	197	197	96.1	98.6	208	k__Fungi	p__Fungi_phy_Incertae_sedis	c__Fungi_cls_Incertae_sedis	o__Fungi_ord_Incertae_sedis	f__Fungi_fam_Incertae_sedis	g__Fungi_gen_Incertae_sedis	s__Fungi_sp
OTU0331	MOSTABUND | n=5/5	0	0	0	2	3	OL338051	SH0831077.10FU	5.05708e-100	367.37	406	1	203	391	593	203	203	100	100	203	k__Fungi	p__Basidiomycota	c__Agaricomycetes	o__Agaricales	f__Entolomataceae	g__Entoloma	s__Entoloma_leuconitens
OTU0332	MOSTABUND | n=5/4	0	0	0	3	2	UDB04201159	SH0853075.10FU	5.64238e-086	320.483	354	1	177	334	510	177	177	100	100	177	k__Fungi	p__Ascomycota	c__Sordariomycetes	o__Hypocreales	f__Cordycipitaceae	g__Cordycipitaceae_gen_Incertae_sedis	s__Cordycipitaceae_sp
OTU0333	MOSTABUND | n=5/5	0	0	0	0	5	UDB04533586	SH0814712.10FU	7.55818e-071	269.988	298	1	154	310	463	152	152	98.7	100	154	k__Fungi	p__Ascomycota	c__Sordariomycetes	o__Sordariomycetes_ord_Incertae_sedis	f__Sordariomycetes_fam_Incertae_sedis	g__Phialemoniopsis	s__Phialemoniopsis_sp
OTU0334	MOSTABUND | n=5/2	0	0	0	0	5	UDB0947084	SH0861103.10FU	0	726.241	804	1	402	402	803	402	402	100	100	402	k__Fungi	p__Basidiomycota	c__Agaricomycetes	o__Agaricomycetes_ord_Incertae_sedis	f__Agaricomycetes_fam_Incertae_sedis	g__Agaricomycetes_gen_Incertae_sedis	s__Agaricomycetes_sp
OTU0335	MOSTABUND | n=5/5	0	0	0	1	4	UDB01476870	SH0988768.10FU	4.00483e-109	398.027	440	1	262	457	716	247	247	94.3	100	262	k__Fungi	p__Mucoromycota	c__Mucoromycetes	o__Mucorales	f__Backusellaceae	g__Backusella	s__Backusella_sp
OTU0336	MOSTABUND | n=5/5	0	0	0	5	0	UDB02866487	SH0990916.10FU	1.8713e-112	408.848	452	1	226	335	560	226	226	100	100	226	k__Fungi	p__Basidiomycota	c__Geminibasidiomycetes	o__Geminibasidiales	f__Geminibasidiaceae	g__Geminibasidium	s__Geminibasidium_sp
OTU0337	MOSTABUND | n=5/1	2	1	2	0	0	UDB03609281	SH1012176.10FU	1.53162e-066	255.561	282	1	144	317	460	143	143	99.3	100	144	k__Fungi	p__Ascomycota	c__Leotiomycetes	o__Helotiales	f__Helotiales_fam_Incertae_sedis	g__Infundichalara	s__Infundichalara_sp
OTU0338	MOSTABUND | n=5/3	1	4	0	0	0	OQ568166	SH0964631.10FU	1.75489e-099	365.567	404	1	202	272	473	202	202	100	100	202	k__Fungi	p__Basidiomycota	c__Cystobasidiomycetes	o__Cystobasidiales	f__Cystobasidiaceae	g__Cystobasidium	s__Cystobasidium_slooffiae
OTU0339	MOSTABUND | n=5/3	0	0	0	2	3	UDB07661775	SH0839979.10FU	2.51144e-070	268.185	296	1	148	285	432	148	148	100	100	148	k__Fungi	p__Ascomycota	c__Dothideomycetes	o__Venturiales	f__Sympoventuriaceae	g__Sympoventuriaceae_gen_Incertae_sedis	s__Sympoventuriaceae_sp
OTU0340	MOSTABUND | n=5/1	0	0	5	0	0	UDB07674985	SH1012176.10FU	7.93397e-064	246.544	272	1	144	315	458	141	141	97.9	100	144	k__Fungi	p__Ascomycota	c__Leotiomycetes	o__Helotiales	f__Pezizellaceae	g__Ciliolarina	s__Ciliolarina_sp
OTU0341	MOSTABUND | n=5/1	0	0	5	0	0	UDB01377483	SH1043674.10FU	1.04162e-016	89.6514	98	4	88	265	355	76	76	89.4	72	118	k__Fungi	p__Ascomycota	c__Ascomycota_cls_Incertae_sedis	o__Ascomycota_ord_Incertae_sedis	f__Ascomycota_fam_Incertae_sedis	g__Ascomycota_gen_Incertae_sedis	s__Ascomycota_sp
OTU0342	MOSTABUND | n=5/3	3	1	1	0	0	MK782308	SH0925502.10FU	1.55825e-066	255.561	282	1	146	758	902	145	145	99.3	100	146	k__Fungi	p__Ascomycota	c__Leotiomycetes	o__Helotiales	f__Helotiales_fam_Incertae_sedis	g__Helotiales_gen_Incertae_sedis	s__Helotiales_sp
OTU0343	MOSTABUND | n=5/4	0	0	5	0	0	OR913034	SH0995683.10FU	7.04812e-078	293.432	324	1	162	373	534	162	162	100	100	162	k__Fungi	p__Ascomycota	c__Sordariomycetes	o__Xylariales	f__Graphostromataceae	g__Biscogniauxia	s__Biscogniauxia_mediterranea
OTU0344	MOSTABUND | n=4/3	0	0	0	3	1	UDB01366980	SH1041517.10FU	4.04767e-030	134.736	148	1	117	350	466	102	102	87.2	74.1	158	k__Fungi	p__Ascomycota	c__Ascomycota_cls_Incertae_sedis	o__Ascomycota_ord_Incertae_sedis	f__Ascomycota_fam_Incertae_sedis	g__Ascomycota_gen_Incertae_sedis	s__Ascomycota_sp
OTU0345	MOSTABUND | n=4/4	0	0	0	0	4
OTU0346	MOSTABUND | n=4/3	0	0	0	2	2	UDB07364984	SH0991555.10FU	3.6044e-102	374.584	414	1	213	267	480	212	212	99.5	100	213	k__Fungi	p__Basidiomycota	c__Wallemiomycetes	o__Wallemiales	f__Wallemiaceae	g__Wallemia	s__Wallemia_sp
OTU0347	MOSTABUND | n=4/2	0	0	0	0	4	UDB02260160	SH1000855.10FU	6.10366e-093	343.926	380	1	213	310	522	204	204	95.8	100	213	k__Fungi	p__Chytridiomycota	c__Chytridiomycota_cls_Incertae_sedis	o__Chytridiomycota_ord_Incertae_sedis	f__Chytridiomycota_fam_Incertae_sedis	g__Chytridiomycota_gen_Incertae_sedis	s__Chytridiomycota_sp
OTU0348	MOSTABUND | n=4/4	0	0	0	1	3	UDB03756105	SH0994761.10FU	1.49166e-066	255.561	282	1	141	307	447	141	141	100	100	141	k__Fungi	p__Ascomycota	c__Lecanoromycetes	o__Peltigerales	f__Pannariaceae	g__Pectenia	s__Pectenia_sp
OTU0349	MOSTABUND | n=4/4	0	0	0	1	3	UDB0925622	SH0990726.10FU	1.12603e-088	329.499	364	1	182	371	552	182	182	100	100	182	k__Fungi	p__Basidiomycota	c__Agaricomycetes	o__Agaricomycetes_ord_Incertae_sedis	f__Agaricomycetes_fam_Incertae_sedis	g__Agaricomycetes_gen_Incertae_sedis	s__Agaricomycetes_sp
OTU0350	MOSTABUND | n=4/4	0	0	0	4	0	FJ237215	SH0950319.10FU	1.33375e-067	259.168	286	1	151	310	460	148	148	98	100	151	k__Fungi	p__Ascomycota	c__Sordariomycetes	o__Sordariomycetes_ord_Incertae_sedis	f__Sordariomycetes_fam_Incertae_sedis	g__Sordariomycetes_gen_Incertae_sedis	s__Sordariomycetes_sp
OTU0351	MOSTABUND | n=4/3	0	0	0	4	0	OM212836	SH0934794.10FU	2.54392e-097	358.353	396	1	198	387	584	198	198	100	100	198	k__Fungi	p__Basidiomycota	c__Agaricomycetes	o__Agaricales	f__Agaricaceae	g__Lepiota	s__Lepiota_clypeolaria
OTU0352	MOSTABUND | n=4/4	0	0	0	2	2	OR793070	SH0940829.10FU	6.78093e-085	316.876	350	1	175	354	528	175	175	100	100	175	k__Fungi	p__Ascomycota	c__Sordariomycetes	o__Hypocreales	f__Bionectriaceae	g__Lasionectriopsis	s__Lasionectriopsis_pteridii
OTU0353	MOSTABUND | n=4/3	0	0	0	4	0	UDB04169376	SH1003996.10FU	2.11304e-098	361.96	400	1	200	396	595	200	200	100	100	200	k__Fungi	p__Basidiomycota	c__Agaricomycetes	o__Agaricales	f__Psathyrellaceae	g__Coprinellus	s__Coprinellus_sp
OTU0354	MOSTABUND | n=4/3	2	0	2	0	0	OR623243	SH0958738.10FU	2.0345e-078	295.235	326	1	163	289	451	163	163	100	100	163	k__Fungi	p__Ascomycota	c__Saccharomycetes	o__Saccharomycetales	f__Trichomonascaceae	g__Blastobotrys	s__Blastobotrys_sp
OTU0355	MOSTABUND | n=4/4	0	0	0	3	1	OP023302	SH0914832.10FU	3.00814e-069	264.578	292	1	146	369	514	146	146	100	100	146	k__Fungi	p__Ascomycota	c__Leotiomycetes	o__Helotiales	f__Gelatinodiscaceae	g__Neobulgaria	s__Neobulgaria_sp
OTU0356	MOSTABUND | n=4/1	0	0	4	0	0	KP018070	SH0847946.10FU	1.75489e-099	365.567	404	1	202	257	458	202	202	100	100	202	k__Fungi	p__Basidiomycota	c__Exobasidiomycetes	o__Exobasidiales	f__Brachybasidiaceae	g__Meira	s__Meira_sp
OTU0357	MOSTABUND | n=4/2	2	1	1	0	0	KF297104	SH1031383.10FU	5.24949e-012	75.2244	82	119	170	422	474	49	49	94.2	22.2	234	k__Fungi	p__Fungi_phy_Incertae_sedis	c__Fungi_cls_Incertae_sedis	o__Fungi_ord_Incertae_sedis	f__Fungi_fam_Incertae_sedis	g__Fungi_gen_Incertae_sedis	s__Fungi_sp
OTU0358	MOSTABUND | n=4/4	0	0	0	4	0	UDB02057248	SH0740508.10FU	3.51376e-075	284.415	314	1	157	334	490	157	157	100	100	157	k__Fungi	p__Ascomycota	c__Dothideomycetes	o__Pleosporales	f__Neophaeosphaeriaceae	g__Neophaeosphaeriaceae_gen_Incertae_sedis	s__Neophaeosphaeriaceae_sp
OTU0359	MOSTABUND | n=4/4	0	0	0	0	4	MK412619	SH0825136.10FU	1.20994e-101	372.78	412	1	206	490	695	206	206	100	100	206	k__Fungi	p__Basidiomycota	c__Agaricomycetes	o__Agaricales	f__Agaricaceae	g__Leucocoprinus	s__Leucocoprinus_sp
OTU0360	MOSTABUND | n=4/3	0	0	0	0	4	OR804005	SH0740145.10FU	1.17564e-081	306.056	338	1	169	386	554	169	169	100	100	169	k__Fungi	p__Ascomycota	c__Sordariomycetes	o__Hypocreales	f__Cordycipitaceae	g__Parengyodontium	s__Parengyodontium_album
OTU0361	MOSTABUND | n=4/2	3	1	0	0	0	OR885094	SH1025978.10FU	4.89182e-080	300.646	332	1	166	435	600	166	166	100	100	166	k__Fungi	p__Ascomycota	c__Sordariomycetes	o__Hypocreales	f__Hypocreaceae	g__Trichoderma	s__Trichoderma_euskadiense
OTU0362	MOSTABUND | n=4/2	1	2	1	0	0	MF976761	SH0905231.10FU	3.05819e-063	244.741	270	1	156	398	554	149	149	95.5	100	156	k__Fungi	p__Fungi_phy_Incertae_sedis	c__Fungi_cls_Incertae_sedis	o__Fungi_ord_Incertae_sedis	f__Fungi_fam_Incertae_sedis	g__Fungi_gen_Incertae_sedis	s__Fungi_sp
OTU0363	MOSTABUND | n=4/4	0	0	0	3	1	UDB03381681	SH0976356.10FU	1.38432e-062	242.938	268	1	195	355	548	176	176	90.3	100	195	k__Fungi	p__Ascomycota	c__Eurotiomycetes	o__Chaetothyriales	f__Herpotrichiellaceae	g__Herpotrichiellaceae_gen_Incertae_sedis	s__Herpotrichiellaceae_sp
OTU0364	MOSTABUND | n=4/3	0	0	0	4	0	OR761545	SH1011939.10FU	1.06789e-068	262.775	290	1	148	365	512	147	147	99.3	100	148	k__Fungi	p__Ascomycota	c__Leotiomycetes	o__Helotiales	f__Ploettnerulaceae	g__Cadophora	s__Cadophora_fastigiata
OTU0365	MOSTABUND | n=4/3	0	0	0	1	3	LC574566	SH0943336.10FU	9.36387e-090	333.106	368	1	184	299	482	184	184	100	100	184	k__Fungi	p__Basidiomycota	c__Agaricomycetes	o__Atheliales	f__Atheliaceae	g__Atheliaceae_gen_Incertae_sedis	s__Atheliaceae_sp
OTU0366	MOSTABUND | n=4/4	0	0	0	3	1	UDB07675207	SH0906266.10FU	1.62749e-086	322.286	356	1	178	336	513	178	178	100	100	178	k__Fungi	p__Ascomycota	c__Sordariomycetes	o__Hypocreales	f__Hypocreaceae	g__Hypomyces	s__Hypomyces_rosellus
OTU0367	MOSTABUND | n=4/4	0	0	0	0	4	UDB07549734	SH1012296.10FU	6.63146e-112	407.044	450	1	229	340	569	229	229	100	100	229	k__Fungi	p__Basidiomycota	c__Microbotryomycetes	o__Sporidiobolales	f__Sporidiobolales_fam_Incertae_sedis	g__Sporidiobolales_gen_Incertae_sedis	s__Sporidiobolales_sp
OTU0368	MOSTABUND | n=4/3	0	1	1	0	2	OR069631	SH0972258.10FU	4.31184e-067	257.365	284	1	142	303	444	142	142	100	100	142	k__Fungi	p__Ascomycota	c__Dothideomycetes	o__Dothideales	f__Dothideaceae	g__Sydowia	s__Sydowia_polyspora
OTU0369	MOSTABUND | n=4/4	0	0	0	4	0	OW984234	SH0966661.10FU	1.27909e-067	259.168	286	1	146	368	513	145	145	99.3	100	146	k__Fungi	p__Ascomycota	c__Ascomycota_cls_Incertae_sedis	o__Ascomycota_ord_Incertae_sedis	f__Ascomycota_fam_Incertae_sedis	g__Hyphozyma	s__Hyphozyma_variabilis
OTU0370	MOSTABUND | n=4/1	2	2	0	0	0	OL739376	SH0743871.10FU	7.86051e-071	269.988	298	1	159	407	565	155	155	97.5	100	159	k__Fungi	p__Basidiomycota	c__Tremellomycetes	o__Tremellales	f__Naemateliaceae	g__Naematelia	s__Naematelia_encephala
OTU0371	MOSTABUND | n=4/1	4	0	0	0	0	FM173097	SH0974823.10FU	4.15401e-088	327.696	362	1	191	359	548	188	188	98.4	99.5	192	k__Fungi	p__Ascomycota	c__Eurotiomycetes	o__Chaetothyriales	f__Herpotrichiellaceae	g__Exophiala	s__Exophiala_sp
OTU0372	MOSTABUND | n=4/3	1	2	1	0	0	UDB03126426	SH0966817.10FU	5.29938e-066	253.758	280	1	143	327	469	142	142	99.3	100	143	k__Fungi	p__Ascomycota	c__Leotiomycetes	o__Leotiales	f__Tympanidaceae	g__Claussenomyces	s__Claussenomyces_sp
OTU0373	MOSTABUND | n=4/3	2	1	1	0	0	FJ235950	SH1025010.10FU	5.39558e-007	57.1907	62	1	107	246	351	81	81	75.7	100	107	k__Fungi	p__Ascomycota	c__Ascomycota_cls_Incertae_sedis	o__Ascomycota_ord_Incertae_sedis	f__Ascomycota_fam_Incertae_sedis	g__Ascomycota_gen_Incertae_sedis	s__Ascomycota_sp
OTU0374	MOSTABUND | n=4/1	1	1	2	0	0
OTU0375	MOSTABUND | n=4/1	0	0	0	0	4	UDB03796114	SH0939544.10FU	1.89127e-072	275.398	304	1	162	331	492	158	158	97.5	100	162	k__Fungi	p__Ascomycota	c__Eurotiomycetes	o__Eurotiales	f__Aspergillaceae	g__Penicillium	s__Penicillium_sp
OTU0376	MOSTABUND | n=4/4	0	0	0	4	0	OQ216428	SH0874723.10FU	1.45907e-073	279.005	308	1	154	301	454	154	154	100	100	154	k__Fungi	p__Ascomycota	c__Sordariomycetes	o__Coniochaetales	f__Coniochaetaceae	g__Coniochaeta	s__Coniochaeta_mutabilis
OTU0377	MOSTABUND | n=4/1	2	1	1	0	0	UDB01377483	SH1043674.10FU	1.65056e-020	102.275	112	4	99	265	367	87	87	90.6	81.4	118	k__Fungi	p__Ascomycota	c__Ascomycota_cls_Incertae_sedis	o__Ascomycota_ord_Incertae_sedis	f__Ascomycota_fam_Incertae_sedis	g__Ascomycota_gen_Incertae_sedis	s__Ascomycota_sp
OTU0378	MOSTABUND | n=4/3	0	0	0	4	0	OP023177	SH1003876.10FU	1.20994e-101	372.78	412	1	206	434	639	206	206	100	100	206	k__Fungi	p__Basidiomycota	c__Agaricomycetes	o__Agaricales	f__Psathyrellaceae	g__Coprinellus	s__Coprinellus_disseminatus
OTU0379	MOSTABUND | n=4/1	1	2	1	0	0	UDB01377483	SH1043674.10FU	2.01079e-019	98.6682	108	4	99	265	367	86	86	89.6	81.4	118	k__Fungi	p__Ascomycota	c__Ascomycota_cls_Incertae_sedis	o__Ascomycota_ord_Incertae_sedis	f__Ascomycota_fam_Incertae_sedis	g__Ascomycota_gen_Incertae_sedis	s__Ascomycota_sp
OTU0380	MOSTABUND | n=4/3	0	0	0	4	0	UDB01617985	SH1000546.10FU	8.65093e-077	289.825	320	1	163	302	464	162	162	99.4	100	163	k__Fungi	p__Ascomycota	c__Dothideomycetes	o__Capnodiales	f__Capnodiales_fam_Incertae_sedis	g__Capnodiales_gen_Incertae_sedis	s__Capnodiales_sp
OTU0381	MOSTABUND | n=4/4	0	0	0	0	4	OP895748	SH0954969.10FU	3.06224e-096	354.747	392	1	196	374	569	196	196	100	100	196	k__Fungi	p__Ascomycota	c__Sordariomycetes	o__Hypocreales	f__Clavicipitaceae	g__Metapochonia	s__Metapochonia_suchlasporia
OTU0382	MOSTABUND | n=4/3	0	0	0	2	2	MK626758	SH1012174.10FU	1.04097e-068	262.775	290	1	145	381	525	145	145	100	100	145	k__Fungi	p__Ascomycota	c__Leotiomycetes	o__Helotiales	f__Ploettnerulaceae	g__Cadophora	s__Cadophora_sp
OTU0383	MOSTABUND | n=4/3	0	0	0	0	4	UDB05514035	SH0919166.10FU	3.95358e-108	394.421	436	1	218	357	574	218	218	100	100	218	k__Fungi	p__Basidiomycota	c__Agaricomycetes	o__Thelephorales	f__Thelephoraceae	g__Thelephora	s__Thelephora_sp
OTU0384	MOSTABUND | n=4/2	3	1	0	0	0	OR778324	SH0974277.10FU	2.44154e-077	291.629	322	1	161	385	545	161	161	100	100	161	k__Fungi	p__Ascomycota	c__Pezizomycetes	o__Pezizales	f__Pyronemataceae	g__Pyronema	s__Pyronema_sp
OTU0385	MOSTABUND | n=4/4	0	0	0	4	0	UDB05115062	SH1000644.10FU	4.31184e-067	257.365	284	1	142	302	443	142	142	100	100	142	k__Fungi	p__Ascomycota	c__Dothideomycetes	o__Mycosphaerellales	f__Teratosphaeriaceae	g__Devriesia	s__Devriesia_sp
OTU0386	MOSTABUND | n=4/2	0	0	0	4	0	UDB01117601	SH0992682.10FU	3.24723e-089	331.303	366	1	183	365	547	183	183	100	100	183	k__Fungi	p__Basidiomycota	c__Agaricomycetes	o__Amylocorticiales	f__Amylocorticiaceae	g__Amylocorticiellum	s__Amylocorticiellum_sp
OTU0387	MOSTABUND | n=4/2	0	0	0	3	1	UDB02498946	SH1023963.10FU	1.88592e-092	342.123	378	1	192	395	586	191	191	99.5	100	192	k__Fungi	p__Ascomycota	c__Eurotiomycetes	o__Onygenales	f__Onygenaceae	g__Onygenaceae_gen_Incertae_sedis	s__Onygenaceae_sp
OTU0388	MOSTABUND | n=4/3	0	0	0	2	2	OQ429469	SH0990374.10FU	2.44154e-077	291.629	322	1	161	338	498	161	161	100	100	161	k__Fungi	p__Ascomycota	c__Sordariomycetes	o__Hypocreales	f__Bionectriaceae	g__Acremonium	s__Acremonium_ellipsoideum
OTU0389	MOSTABUND | n=4/4	0	0	0	0	4	OM066248	SH0733194.10FU	1.99569e-065	251.955	278	1	152	337	488	147	147	96.7	100	152	k__Fungi	p__Ascomycota	c__Eurotiomycetes	o__Verrucariales	f__Verrucariaceae	g__Verrucaria	s__Verrucaria_sp
OTU0390	MOSTABUND | n=4/3	0	0	0	0	4	UDB02303432	SH1000860.10FU	1.65428e-106	389.011	430	1	215	309	523	215	215	100	100	215	k__Fungi	p__Chytridiomycota	c__Chytridiomycota_cls_Incertae_sedis	o__Chytridiomycota_ord_Incertae_sedis	f__Chytridiomycota_fam_Incertae_sedis	g__Chytridiomycota_gen_Incertae_sedis	s__Chytridiomycota_sp
OTU0391	MOSTABUND | n=4/1	1	2	1	0	0	UDB04263802	SH0767731.10FU	6.6012e-072	273.595	302	1	162	333	495	159	159	98.1	100	162	k__Fungi	p__Ascomycota	c__Eurotiomycetes	o__Eurotiales	f__Aspergillaceae	g__Penicillium	s__Penicillium_sp
OTU0392	MOSTABUND | n=4/2	2	0	2	0	0	AM901832	SH0934681.10FU	1.33368e-101	372.78	412	1	224	539	762	217	217	96.9	100	224	k__Fungi	p__Basidiomycota	c__Exobasidiomycetes	o__Exobasidiales	f__Exobasidiaceae	g__Exobasidium	s__Exobasidium_sp
OTU0393	MOSTABUND | n=4/2	0	0	0	0	4	OR807981	SH0888267.10FU	5.87245e-079	297.039	328	1	164	330	493	164	164	100	100	164	k__Fungi	p__Ascomycota	c__Eurotiomycetes	o__Eurotiales	f__Aspergillaceae	g__Aspergillus	s__Aspergillus_sydowii
OTU0394	MOSTABUND | n=3/2	0	0	0	1	2	UDB06262320	SH0922608.10FU	1.6811e-106	389.011	430	1	218	359	576	217	217	99.5	100	218	k__Fungi	p__Basidiomycota	c__Agaricomycetes	o__Thelephorales	f__Thelephoraceae	g__Tomentella	s__Tomentella_sp
OTU0395	MOSTABUND | n=3/2	0	0	0	0	3	UDB05269119	SH0759066.10FU	9.5815e-063	242.938	268	1	143	338	481	141	141	98.6	100	143	k__Fungi	p__Ascomycota	c__Dothideomycetes	o__Dothideomycetes_ord_Incertae_sedis	f__Dothideomycetes_fam_Incertae_sedis	g__Dothideomycetes_gen_Incertae_sedis	s__Dothideomycetes_sp
OTU0396	MOSTABUND | n=3/2	0	0	0	2	1	UDB05471677	SH0908259.10FU	1.24629e-067	259.168	286	1	143	319	461	143	143	100	100	143	k__Fungi	p__Ascomycota	c__Leotiomycetes	o__Helotiales	f__Helotiales_fam_Incertae_sedis	g__Tetracladium	s__Tetracladium_sp
OTU0397	MOSTABUND | n=3/1	3	0	0	0	0
OTU0398	MOSTABUND | n=3/3	0	0	0	2	1	PP147771	SH0978756.10FU	1.45907e-073	279.005	308	1	154	397	550	154	154	100	100	154	k__Fungi	p__Ascomycota	c__Sordariomycetes	o__Sordariales	f__Chaetomiaceae	g__Chaetomium	s__Chaetomium_sp
OTU0399	MOSTABUND | n=3/1	0	1	2	0	0	UDB01377483	SH1043674.10FU	2.01079e-019	98.6682	108	4	99	265	367	86	86	89.6	81.4	118	k__Fungi	p__Ascomycota	c__Ascomycota_cls_Incertae_sedis	o__Ascomycota_ord_Incertae_sedis	f__Ascomycota_fam_Incertae_sedis	g__Ascomycota_gen_Incertae_sedis	s__Ascomycota_sp
OTU0400	MOSTABUND | n=3/2	0	0	0	0	3	OQ064864	SH0886174.10FU	2.01532e-105	385.404	426	1	215	437	651	214	214	99.5	100	215	k__Fungi	p__Basidiomycota	c__Agaricomycetes	o__Agaricales	f__Hymenogastraceae	g__Gymnopilus	s__Gymnopilus_sp
OTU0401	MOSTABUND | n=3/2	0	0	0	3	0	UDB01443310	SH0888275.10FU	5.87245e-079	297.039	328	1	164	311	474	164	164	100	100	164	k__Fungi	p__Ascomycota	c__Eurotiomycetes	o__Eurotiales	f__Aspergillaceae	g__Aspergillus	s__Aspergillus_sp
OTU0402	MOSTABUND | n=3/2	0	0	0	2	1	UDB02376900	SH0945906.10FU	6.3427e-065	250.151	276	1	141	326	466	140	140	99.3	100	141	k__Fungi	p__Ascomycota	c__Leotiomycetes	o__Helotiales	f__Myxotrichaceae	g__Oidiodendron	s__Oidiodendron_sp
OTU0403	MOSTABUND | n=3/1	2	0	1	0	0	UDB05377383	SH0949870.10FU	8.08591e-092	340.32	376	3	229	300	524	212	212	93.4	99.1	229	k__Fungi	p__Basidiomycota	c__Cystobasidiomycetes	o__Erythrobasidiales	f__Erythrobasidiales_fam_Incertae_sedis	g__Erythrobasidiales_gen_Incertae_sedis	s__Erythrobasidiales_sp
OTU0404	MOSTABUND | n=3/3	0	0	0	3	0	KR818912	SH0844596.10FU	7.33184e-098	360.157	398	1	199	395	593	199	199	100	100	199	k__Fungi	p__Basidiomycota	c__Agaricomycetes	o__Agaricales	f__Callistosporiaceae	g__Pseudolaccaria	s__Pseudolaccaria_pachyphylla
OTU0405	MOSTABUND | n=3/2	0	0	0	0	3	UDB07060814	SH0849370.10FU	1.7855e-099	365.567	404	1	205	328	532	204	204	99.5	100	205	k__Fungi	p__Basidiomycota	c__Agaricomycetes	o__Cantharellales	f__Hydnaceae	g__Sistotrema	s__Sistotrema_sp
OTU0406	MOSTABUND | n=3/2	0	0	0	3	0	UDB07392191	SH0841412.10FU	1.15682e-108	396.224	438	1	222	384	605	221	221	99.5	100	222	k__Fungi	p__Chytridiomycota	c__Spizellomycetes	o__Spizellomycetales	f__Spizellomycetales_fam_Incertae_sedis	g__Spizellomycetales_gen_Incertae_sedis	s__Spizellomycetales_sp
OTU0407	MOSTABUND | n=3/3	0	0	0	2	1	KY096648	SH0870057.10FU	4.22062e-081	304.252	336	1	173	424	596	171	171	98.8	100	173	k__Fungi	p__Ascomycota	c__Eurotiomycetes	o__Chaetothyriales	f__Chaetothyriales_fam_Incertae_sedis	g__Chaetothyriales_gen_Incertae_sedis	s__Chaetothyriales_sp
OTU0408	MOSTABUND | n=3/1	0	0	3	0	0	AJ972856	SH0983459.10FU	9.49745e-063	242.938	268	1	142	2039	2180	139	139	97.9	100	142	k__Fungi	p__Ascomycota	c__Dothideomycetes	o__Mycosphaerellales	f__Extremaceae	g__Extremaceae_gen_Incertae_sedis	s__Extremaceae_sp
OTU0409	MOSTABUND | n=3/3	0	0	0	1	2	UDB04272186	SH0940542.10FU	7.04812e-078	293.432	324	1	162	332	493	162	162	100	100	162	k__Fungi	p__Ascomycota	c__Eurotiomycetes	o__Eurotiales	f__Aspergillaceae	g__Penicillium	s__Penicillium_sp
OTU0410	MOSTABUND | n=3/1	0	0	3	0	0	UDB01773080	SH0961639.10FU	2.7858e-070	268.185	296	1	161	354	514	156	156	96.9	100	161	k__Fungi	p__Ascomycota	c__Eurotiomycetes	o__Chaetothyriales	f__Chaetothyriales_fam_Incertae_sedis	g__Chaetothyriales_gen_Incertae_sedis	s__Chaetothyriales_sp
OTU0411	MOSTABUND | n=3/2	0	0	0	3	0	UDB031965	SH0883817.10FU	1.75489e-099	365.567	404	1	202	403	604	202	202	100	100	202	k__Fungi	p__Basidiomycota	c__Agaricomycetes	o__Boletales	f__Coniophoraceae	g__Coniophora	s__Coniophora_olivacea
OTU0412	MOSTABUND | n=3/1	3	0	0	0	0	MT872626	SH0912803.10FU	3.58212e-043	178.016	196	1	148	1577	1723	129	129	87.2	98	151	k__Fungi	p__Ascomycota	c__Eurotiomycetes	o__Eurotiomycetes_ord_Incertae_sedis	f__Eurotiomycetes_fam_Incertae_sedis	g__Eurotiomycetes_gen_Incertae_sedis	s__Eurotiomycetes_sp
OTU0413	MOSTABUND | n=3/1	1	0	1	1	0	AJ972850	SH0763614.10FU	5.01561e-054	214.084	236	1	146	350	497	139	139	95.2	96.1	152	k__Fungi	p__Ascomycota	c__Dothideomycetes	o__Mycosphaerellales	f__Teratosphaeriaceae	g__Capnobotryella	s__Capnobotryella_sp
OTU0414	MOSTABUND | n=3/3	0	0	0	3	0	KX344056	SH0937840.10FU	3.79497e-037	158.179	174	1	153	345	488	126	126	82.4	91.6	167	k__Fungi	p__Ascomycota	c__Eurotiomycetes	o__Verrucariales	f__Verrucariaceae	g__Verrucaria	s__Verrucaria_othmarbreussii
OTU0415	MOSTABUND | n=3/1	0	0	0	3	0	UDB04151284	SH0939438.10FU	3.39379e-069	264.578	292	2	161	332	492	156	156	97.5	99.4	161	k__Fungi	p__Ascomycota	c__Eurotiomycetes	o__Eurotiales	f__Aspergillaceae	g__Penicillium	s__Penicillium_sp
OTU0416	MOSTABUND | n=3/3	0	0	0	1	2	UDB04468155	SH0929647.10FU	3.88391e-068	260.971	288	1	149	302	450	147	147	98.7	97.4	153	k__Fungi	p__Ascomycota	c__Dothideomycetes	o__Pleosporales	f__Cryptocoryneaceae	g__Cryptocoryneum	s__Cryptocoryneum_sp
OTU0417	MOSTABUND | n=3/3	0	0	0	3	0	OR069628	SH0925958.10FU	7.04812e-078	293.432	324	1	162	333	494	162	162	100	100	162	k__Fungi	p__Ascomycota	c__Sordariomycetes	o__Coniochaetales	f__Coniochaetaceae	g__Coniochaeta	s__Coniochaeta_sp
OTU0418	MOSTABUND | n=3/1	1	0	2	0	0	MK782301	SH0850121.10FU	9.21588e-051	203.264	224	1	154	323	488	148	148	96.1	100	154	k__Fungi	p__Ascomycota	c__Saccharomycetes	o__Saccharomycetales	f__Saccharomycetales_fam_Incertae_sedis	g__Saccharomycetales_gen_Incertae_sedis	s__Saccharomycetales_sp
OTU0419	MOSTABUND | n=3/1	0	0	0	0	3	UDB03940434	SH0940189.10FU	1.75726e-079	298.842	330	1	170	331	499	169	169	99.4	100	170	k__Fungi	p__Ascomycota	c__Eurotiomycetes	o__Eurotiales	f__Aspergillaceae	g__Penicillium	s__Penicillium_sp
OTU0420	MOSTABUND | n=3/1	0	0	3	0	0	UDB07674985	SH1012176.10FU	1.86589e-065	251.955	278	1	144	315	458	142	142	98.6	100	144	k__Fungi	p__Ascomycota	c__Leotiomycetes	o__Helotiales	f__Pezizellaceae	g__Ciliolarina	s__Ciliolarina_sp
OTU0421	MOSTABUND | n=3/2	0	0	0	3	0	UDB03980529	SH0809959.10FU	8.69211e-070	266.382	294	1	147	310	456	147	147	100	100	147	k__Fungi	p__Ascomycota	c__Leotiomycetes	o__Helotiales	f__Dermateaceae	g__Coleophoma	s__Coleophoma_sp
OTU0422	MOSTABUND | n=3/2	1	1	1	0	0	OR069551	SH0767731.10FU	1.2025e-068	262.775	290	1	163	331	493	156	156	95.7	100	163	k__Fungi	p__Ascomycota	c__Eurotiomycetes	o__Eurotiales	f__Aspergillaceae	g__Penicillium	s__Penicillium_corylophilum
OTU0423	MOSTABUND | n=3/3	0	0	0	1	2	UDB03014600	SH0997442.10FU	2.18278e-071	271.792	300	1	155	314	468	153	153	98.7	100	155	k__Fungi	p__Ascomycota	c__Sordariomycetes	o__Hypocreales	f__Nectriaceae	g__Paracremonium	s__Paracremonium_sp
OTU0424	MOSTABUND | n=3/1	0	0	0	2	1	OQ448338	SH0953899.10FU	2.31461e-111	405.241	448	1	229	349	577	227	227	99.1	100	229	k__Fungi	p__Basidiomycota	c__Tremellomycetes	o__Filobasidiales	f__Piskurozymaceae	g__Solicoccozyma	s__Solicoccozyma_gelidoterrea
OTU0425	MOSTABUND | n=3/1	2	1	0	0	0	OP886682	SH0931161.10FU	1.27909e-067	259.168	286	1	146	935	1080	145	145	99.3	100	146	k__Fungi	p__Ascomycota	c__Leotiomycetes	o__Leotiales	f__Tympanidaceae	g__Pragmopora	s__Pragmopora_pini
OTU0426	MOSTABUND | n=3/1	0	0	0	2	1	PP034033	SH0939544.10FU	3.65102e-075	284.415	314	1	162	208	369	160	160	98.8	100	162	k__Fungi	p__Ascomycota	c__Eurotiomycetes	o__Eurotiales	f__Aspergillaceae	g__Penicillium	s__Penicillium_virgatum
OTU0427	MOSTABUND | n=3/3	0	0	0	0	3	UDB01971331	SH0879024.10FU	1.5945e-068	262.775	290	1	208	360	571	191	191	91.8	100	208	k__Fungi	p__Ascomycota	c__Eurotiomycetes	o__Chaetothyriales	f__Herpotrichiellaceae	g__Exophiala	s__Exophiala_sp
OTU0428	MOSTABUND | n=3/1	0	0	0	2	1	OR500223	SH0856291.10FU	1.21684e-074	282.612	312	1	156	474	629	156	156	100	100	156	k__Fungi	p__Ascomycota	c__Dothideomycetes	o__Pleosporales	f__Pleosporaceae	g__Stemphylium	s__Stemphylium_eturmiunum
OTU0429	MOSTABUND | n=3/3	0	0	0	3	0	OP178972	SH0968180.10FU	3.51376e-075	284.415	314	1	157	367	523	157	157	100	100	157	k__Fungi	p__Ascomycota	c__Dothideomycetes	o__Pleosporales	f__Trematosphaeriaceae	g__Trematosphaeria	s__Trematosphaeria_grisea
OTU0430	MOSTABUND | n=3/3	0	0	0	1	2	OR584249	SH0996590.10FU	2.22661e-091	338.516	374	1	187	322	508	187	187	100	100	187	k__Fungi	p__Ascomycota	c__Sordariomycetes	o__Hypocreales	f__Hypocreales_fam_Incertae_sedis	g__Hypocreales_gen_Incertae_sedis	s__Hypocreales_sp
OTU0431	MOSTABUND | n=3/1	0	2	1	0	0	UDB0995635	SH0856386.10FU	1.01457e-075	286.219	316	1	158	323	480	158	158	100	100	158	k__Fungi	p__Ascomycota	c__Dothideomycetes	o__Pleosporales	f__Pleosporaceae	g__Alternaria	s__Alternaria_sp
OTU0432	MOSTABUND | n=3/3	0	0	0	0	3	MT730729	SH0745586.10FU	3.70462e-115	417.864	462	1	231	2205	2435	231	231	100	100	231	k__Fungi	p__Chytridiomycota	c__Spizellomycetes	o__Spizellomycetales	f__Spizellomycetaceae	g__Spizellomycetaceae_gen_Incertae_sedis	s__Spizellomycetaceae_sp
OTU0433	MOSTABUND | n=3/3	0	0	0	0	3	UDB05254388	SH1014041.10FU	2.5266e-065	251.955	278	1	185	250	434	171	171	92.4	99.5	186	k__Fungi	p__Glomeromycota	c__Glomeromycetes	o__Glomerales	f__Glomeraceae	g__Dominikia	s__Dominikia_sp
OTU0434	MOSTABUND | n=3/3	0	0	0	1	2	UDB06645931	SH0866046.10FU	5.64238e-086	320.483	354	1	177	335	511	177	177	100	100	177	k__Fungi	p__Ascomycota	c__Sordariomycetes	o__Hypocreales	f__Myrotheciomycetaceae	g__Trichothecium	s__Trichothecium_sp
OTU0435	MOSTABUND | n=3/3	0	0	0	3	0	UDB05406948	SH0901474.10FU	5.87245e-079	297.039	328	1	164	343	506	164	164	100	100	164	k__Fungi	p__Ascomycota	c__Eurotiomycetes	o__Eurotiales	f__Trichocomaceae	g__Talaromyces	s__Talaromyces_sp
OTU0436	MOSTABUND | n=3/3	0	0	0	3	0	OR778441	SH1003896.10FU	5.05708e-100	367.37	406	1	203	440	642	203	203	100	100	203	k__Fungi	p__Basidiomycota	c__Agaricomycetes	o__Agaricales	f__Psathyrellaceae	g__Coprinellus	s__Coprinellus_micaceus
OTU0437	MOSTABUND | n=3/1	3	0	0	0	0	UDB07378601	SH0745575.10FU	1.92073e-093	345.73	382	1	231	387	619	218	218	94.4	100	231	k__Fungi	p__Chytridiomycota	c__Spizellomycetes	o__Spizellomycetales	f__Spizellomycetaceae	g__Spizellomycetaceae_gen_Incertae_sedis	s__Spizellomycetaceae_sp
OTU0438	MOSTABUND | n=3/2	0	0	0	0	3	UDB04115036	SH0883835.10FU	3.15447e-096	354.747	392	1	201	388	588	199	199	99	100	201	k__Fungi	p__Basidiomycota	c__Agaricomycetes	o__Boletales	f__Coniophoraceae	g__Coniophora	s__Coniophora_sp
OTU0439	MOSTABUND | n=3/2	0	0	0	1	2	UDB01825649	SH1015258.10FU	1.17564e-081	306.056	338	1	169	347	515	169	169	100	100	169	k__Fungi	p__Ascomycota	c__Eurotiomycetes	o__Onygenales	f__Onygenaceae	g__Myriodontium	s__Myriodontium_sp
OTU0440	MOSTABUND | n=3/3	0	0	0	0	3	UDB0444135	SH0945996.10FU	9.24531e-063	242.938	268	1	137	298	434	136	136	99.3	98.6	139	k__Fungi	p__Ascomycota	c__Leotiomycetes	o__Leotiomycetes_ord_Incertae_sedis	f__Leotiomycetes_fam_Incertae_sedis	g__Leotiomycetes_gen_Incertae_sedis	s__Leotiomycetes_sp
OTU0441	MOSTABUND | n=3/2	0	1	0	2	0	OP627129	SH0877593.10FU	1.37259e-107	392.617	434	1	217	304	520	217	217	100	100	217	k__Fungi	p__Basidiomycota	c__Microbotryomycetes	o__Sporidiobolales	f__Sporidiobolaceae	g__Rhodotorula	s__Rhodotorula_mucilaginosa
OTU0442	MOSTABUND | n=3/1	2	1	0	0	0	KY102579	SH0733965.10FU	8.45907e-073	277.202	306	1	235	369	600	207	207	88.1	98.7	238	k__Fungi	p__Basidiomycota	c__Microbotryomycetes	o__Microbotryomycetes_ord_Incertae_sedis	f__Colacogloeaceae	g__Colacogloea	s__Colacogloea_terpenoidalis
OTU0443	MOSTABUND | n=3/1	1	0	0	1	1	LN713992	SH0763609.10FU	7.55818e-071	269.988	298	1	154	299	452	152	152	98.7	100	154	k__Fungi	p__Ascomycota	c__Dothideomycetes	o__Mycosphaerellales	f__Neodevriesiaceae	g__Neodevriesia	s__Neodevriesia_sp
OTU0444	MOSTABUND | n=3/2	0	0	0	2	1	UDB05253053	SH1014240.10FU	5.53454e-080	300.646	332	1	184	262	445	177	177	96.2	100	184	k__Fungi	p__Glomeromycota	c__Glomeromycetes	o__Glomerales	f__Glomeraceae	g__Dominikia	s__Dominikia_sp
OTU0445	MOSTABUND | n=3/2	0	0	0	3	0	OR782801	SH0978756.10FU	5.05192e-073	277.202	306	1	153	323	475	153	153	100	100	153	k__Fungi	p__Ascomycota	c__Sordariomycetes	o__Sordariales	f__Chaetomiaceae	g__Botryotrichum	s__Botryotrichum_murorum
OTU0446	MOSTABUND | n=2/2	0	0	0	2	0	UDB02805107	SH0908345.10FU	3.00814e-069	264.578	292	1	146	317	462	146	146	100	100	146	k__Fungi	p__Ascomycota	c__Leotiomycetes	o__Helotiales	f__Helotiales_fam_Incertae_sedis	g__Leohumicola	s__Leohumicola_sp
OTU0447	MOSTABUND | n=2/1	2	0	0	0	0	KM104151	SH0907363.10FU	1.81611e-099	365.567	404	1	205	390	594	204	204	99.5	98.6	208	k__Fungi	p__Fungi_phy_Incertae_sedis	c__Fungi_cls_Incertae_sedis	o__Fungi_ord_Incertae_sedis	f__Fungi_fam_Incertae_sedis	g__Fungi_gen_Incertae_sedis	s__Fungi_sp
OTU0448	MOSTABUND | n=2/2	0	0	0	0	2	OR594138	SH1012867.10FU	8.33777e-104	379.994	420	1	210	506	715	210	210	100	100	210	k__Fungi	p__Basidiomycota	c__Agaricomycetes	o__Agaricales	f__Lycoperdaceae	g__Bovista	s__Bovista_plumbea
OTU0449	MOSTABUND | n=2/1	2	0	0	0	0	OP045988	SH0880566.10FU	4.46824e-114	414.258	458	1	229	341	569	229	229	100	100	229	k__Fungi	p__Basidiomycota	c__Microbotryomycetes	o__Microbotryomycetes_ord_Incertae_sedis	f__Colacogloeaceae	g__Colacogloea	s__Colacogloea_sp
OTU0450	MOSTABUND | n=2/2	0	0	0	2	0	UDB01675780	SH1006133.10FU	2.46988e-072	275.398	304	1	201	365	562	184	184	91.5	98.5	204	k__Fungi	p__Basidiomycota	c__Agaricomycetes	o__Amylocorticiales	f__Amylocorticiaceae	g__Ceraceomyces	s__Ceraceomyces_sp
OTU0451	MOSTABUND | n=2/1	0	0	2	0	0	OM337573	SH0849718.10FU	4.48129e-074	280.808	310	1	163	538	700	160	160	98.2	100	163	k__Fungi	p__Ascomycota	c__Dothideomycetes	o__Mytilinidiales	f__Mytilinidiaceae	g__Mytilinidion	s__Mytilinidion_resinicola
OTU0452	MOSTABUND | n=2/1	0	0	0	0	2	UDB01507152	SH0914322.10FU	9.78808e-083	309.662	342	1	171	309	479	171	171	100	100	171	k__Fungi	p__Ascomycota	c__Sordariomycetes	o__Hypocreales	f__Cordycipitaceae	g__Beauveria	s__Beauveria_sp
OTU0453	MOSTABUND | n=2/1	0	0	2	0	0	UDB07499237	SH1012135.10FU	2.79331e-063	244.741	270	1	145	317	461	141	141	97.2	100	145	k__Fungi	p__Ascomycota	c__Leotiomycetes	o__Helotiales	f__Pezizellaceae	g__Xenopolyscytalum	s__Xenopolyscytalum_sp
OTU0454	MOSTABUND | n=2/1	1	0	1	0	0	UDB06512388	SH0980336.10FU	4.00016e-088	327.696	362	1	186	351	536	184	184	98.9	100	186	k__Fungi	p__Mucoromycota	c__Mucoromycetes	o__Mucorales	f__Rhizopodaceae	g__Rhizopus	s__Rhizopus_sp
OTU0455	MOSTABUND | n=2/1	2	0	0	0	0	UDB07674985	SH1012176.10FU	1.86589e-065	251.955	278	1	144	315	458	142	142	98.6	100	144	k__Fungi	p__Ascomycota	c__Leotiomycetes	o__Helotiales	f__Pezizellaceae	g__Ciliolarina	s__Ciliolarina_sp
OTU0456	MOSTABUND | n=2/2	0	0	0	0	2	OR600163	SH0939885.10FU	1.69495e-079	298.842	330	1	165	371	535	165	165	100	100	165	k__Fungi	p__Ascomycota	c__Eurotiomycetes	o__Eurotiales	f__Aspergillaceae	g__Penicillium	s__Penicillium_sp
OTU0457	MOSTABUND | n=2/1	0	0	0	2	0	UDB01611729	SH0821462.10FU	6.20413e-072	273.595	302	1	154	301	454	153	153	99.4	100	154	k__Fungi	p__Ascomycota	c__Dothideomycetes	o__Mycosphaerellales	f__Teratosphaeriaceae	g__Capnobotryella	s__Capnobotryella_sp
OTU0458	MOSTABUND | n=2/1	0	2	0	0	0	MG471105	SH0877584.10FU	8.91801e-072	273.595	302	1	210	334	541	187	187	89	100	210	k__Fungi	p__Basidiomycota	c__Microbotryomycetes	o__Sporidiobolales	f__Sporidiobolaceae	g__Rhodosporidiobolus	s__Rhodosporidiobolus_sp
OTU0459	MOSTABUND | n=2/2	0	0	0	2	0	PP085517	SH0757387.10FU	1.99354e-105	385.404	426	1	213	463	675	213	213	100	100	213	k__Fungi	p__Basidiomycota	c__Agaricomycetes	o__Agaricales	f__Agaricaceae	g__Agaricus	s__Agaricus_brunneolus
OTU0460	MOSTABUND | n=2/2	0	0	0	1	1	MF976638	SH1020506.10FU	4.54277e-042	174.41	192	1	156	396	553	137	137	87.8	100	156	k__Fungi	p__Fungi_phy_Incertae_sedis	c__Fungi_cls_Incertae_sedis	o__Fungi_ord_Incertae_sedis	f__Fungi_fam_Incertae_sedis	g__Fungi_gen_Incertae_sedis	s__Fungi_sp
OTU0461	MOSTABUND | n=2/1	0	0	0	2	0	UDB07392434	SH0927176.10FU	1.05704e-096	356.55	394	1	230	474	703	217	217	94.3	100	230	k__Fungi	p__Chytridiomycota	c__Spizellomycetes	o__Spizellomycetales	f__Spizellomycetales_fam_Incertae_sedis	g__Spizellomycetales_gen_Incertae_sedis	s__Spizellomycetales_sp
OTU0462	MOSTABUND | n=2/2	0	0	0	2	0	MW215455	SH0916881.10FU	2.82408e-083	311.466	344	1	172	444	615	172	172	100	100	172	k__Fungi	p__Fungi_phy_Incertae_sedis	c__Fungi_cls_Incertae_sedis	o__Fungi_ord_Incertae_sedis	f__Fungi_fam_Incertae_sedis	g__Fungi_gen_Incertae_sedis	s__Fungi_sp
OTU0463	MOSTABUND | n=2/2	0	0	0	2	0	UDB024328	SH1004987.10FU	5.33654e-093	343.926	380	1	190	431	620	190	190	100	100	190	k__Fungi	p__Basidiomycota	c__Agaricomycetes	o__Agaricales	f__Psathyrellaceae	g__Kauffmania	s__Kauffmania_larga
OTU0464	MOSTABUND | n=2/2	0	0	0	2	0	OR872185	SH1012834.10FU	1.99354e-105	385.404	426	1	213	438	650	213	213	100	100	213	k__Fungi	p__Basidiomycota	c__Agaricomycetes	o__Agaricales	f__Lycoperdaceae	g__Lycoperdon	s__Lycoperdon_perlatum
OTU0465	MOSTABUND | n=2/2	0	0	0	2	0	UDB03158424	SH0737335.10FU	1.03359e-083	313.269	346	1	213	370	584	200	200	93.9	100	213	k__Fungi	p__Basidiomycota	c__Agaricomycetes	o__Agaricales	f__Clavariaceae	g__Clavaria	s__Clavaria_sp
OTU0466	MOSTABUND | n=2/1	1	0	1	0	0	UDB03610486	SH1012176.10FU	1.53162e-066	255.561	282	1	144	317	460	143	143	99.3	100	144	k__Fungi	p__Ascomycota	c__Leotiomycetes	o__Helotiales	f__Helotiales_fam_Incertae_sedis	g__Infundichalara	s__Infundichalara_sp
OTU0467	MOSTABUND | n=2/2	0	0	0	2	0	UDB06357582	SH0862694.10FU	5.12122e-055	217.691	240	1	182	348	527	158	158	86.8	100	182	k__Fungi	p__Ascomycota	c__Eurotiomycetes	o__Chaetothyriales	f__Herpotrichiellaceae	g__Rhinocladiella	s__Rhinocladiella_sp
OTU0468	MOSTABUND | n=2/2	0	0	0	1	1	UDB02321452	SH0945817.10FU	1.49166e-066	255.561	282	1	141	328	468	141	141	100	100	141	k__Fungi	p__Ascomycota	c__Leotiomycetes	o__Helotiales	f__Myxotrichaceae	g__Oidiodendron	s__Oidiodendron_sp
OTU0469	MOSTABUND | n=2/1	0	0	0	2	0	UDB06585210	SH1025555.10FU	3.46449e-082	307.859	340	1	173	342	514	172	172	99.4	100	173	k__Fungi	p__Ascomycota	c__Sordariomycetes	o__Hypocreales	f__Hypocreaceae	g__Trichoderma	s__Trichoderma_sp
OTU0470	MOSTABUND | n=2/1	0	0	2	0	0	UDB0951703	SH0906318.10FU	1.3842e-037	159.983	176	2	199	308	508	163	163	82.3	96.1	206	k__Fungi	p__Basidiomycota	c__Agaricostilbomycetes	o__Agaricostilbales	f__Agaricostilbales_fam_Incertae_sedis	g__Agaricostilbales_gen_Incertae_sedis	s__Agaricostilbales_sp
OTU0471	MOSTABUND | n=2/2	0	0	0	0	2	OQ876250	SH1025749.10FU	4.89182e-080	300.646	332	1	166	348	513	166	166	100	100	166	k__Fungi	p__Ascomycota	c__Sordariomycetes	o__Hypocreales	f__Hypocreaceae	g__Trichoderma	s__Trichoderma_spirale
OTU0472	MOSTABUND | n=2/1	0	0	0	2	0	UDB05272567	SH1003981.10FU	6.08957e-099	363.763	402	1	201	396	596	201	201	100	100	201	k__Fungi	p__Basidiomycota	c__Agaricomycetes	o__Agaricales	f__Psathyrellaceae	g__Psathyrella	s__Psathyrella_sp
OTU0473	MOSTABUND | n=2/2	0	0	0	2	0	UDB03295172	SH0995064.10FU	4.76521e-107	390.814	432	1	216	395	610	216	216	100	100	216	k__Fungi	p__Basidiomycota	c__Agaricomycetes	o__Agaricales	f__Hymenogastraceae	g__Hebeloma	s__Hebeloma_sp
OTU0474	MOSTABUND | n=2/2	0	0	0	2	0	UDB03196959	SH0989314.10FU	7.10605e-085	316.876	350	1	182	395	575	180	180	98.9	100	182	k__Fungi	p__Mucoromycota	c__Mucoromycetes	o__Mucorales	f__Cunninghamellaceae	g__Gongronella	s__Gongronella_sp
OTU0475	MOSTABUND | n=2/1	0	2	0	0	0	UDB02410273	SH0971208.10FU	2.29752e-091	338.516	374	1	192	317	508	190	190	99	100	192	k__Fungi	p__Basidiomycota	c__Agaricomycetes	o__Cantharellales	f__Oliveoniaceae	g__Oliveonia	s__Oliveonia_sp
OTU0476	MOSTABUND | n=2/2	0	0	0	0	2	UDB06741266	SH0894143.10FU	3.90455e-088	327.696	362	1	181	276	456	181	181	100	100	181	k__Fungi	p__Basidiomycota	c__Tritirachiomycetes	o__Tritirachiales	f__Tritirachiaceae	g__Tritirachiaceae_gen_Incertae_sedis	s__Tritirachiaceae_sp
OTU0477	MOSTABUND | n=2/2	0	0	0	0	2	KP018268	SH1002322.10FU	3.90455e-088	327.696	362	1	181	229	409	181	181	100	100	181	k__Fungi	p__Ascomycota	c__Sordariomycetes	o__Glomerellales	f__Plectosphaerellaceae	g__Acrostalagmus	s__Acrostalagmus_luteoalbus
OTU0478	MOSTABUND | n=2/1	0	0	0	2	0	OQ996609	SH0936997.10FU	7.96962e-091	336.713	372	1	191	333	523	189	189	99	100	191	k__Fungi	p__Ascomycota	c__Sordariomycetes	o__Hypocreales	f__Clavicipitaceae	g__Metarhizium	s__Metarhizium_flavoviride
OTU0479	MOSTABUND | n=2/2	0	0	0	0	2	UDB05092616	SH0811371.10FU	1.25961e-081	306.056	338	1	179	330	513	179	179	100	100	179	k__Fungi	p__Ascomycota	c__Sordariomycetes	o__Hypocreales	f__Clavicipitaceae	g__Pochonia	s__Pochonia_sp
OTU0480	MOSTABUND | n=2/2	0	0	0	1	1	PP068889	SH0990499.10FU	4.69413e-087	324.089	358	1	179	303	481	179	179	100	100	179	k__Fungi	p__Ascomycota	c__Sordariomycetes	o__Hypocreales	f__Bionectriaceae	g__Acremonium	s__Acremonium_charticola
OTU0481	MOSTABUND | n=2/2	0	0	0	0	2	KT203183	SH0965014.10FU	6.92027e-085	316.876	350	1	178	301	478	177	177	99.4	100	178	k__Fungi	p__Ascomycota	c__Sordariomycetes	o__Microascales	f__Microascaceae	g__Microascus	s__Microascus_sp
OTU0482	MOSTABUND | n=2/2	0	0	0	0	2	UDB03145609	SH0884966.10FU	9.7248e-097	356.55	394	1	214	336	548	208	208	97.2	100	214	k__Fungi	p__Basidiomycota	c__Agaricomycetes	o__Agaricales	f__Clavariaceae	g__Clavaria	s__Clavaria_sp
OTU0483	MOSTABUND | n=2/2	0	0	0	0	2	UDB02119494	SH0882391.10FU	1.52173e-094	349.336	386	1	223	307	528	212	212	95.1	99.6	224	k__Fungi	p__Fungi_phy_Incertae_sedis	c__Fungi_cls_Incertae_sedis	o__Fungi_ord_Incertae_sedis	f__Fungi_fam_Incertae_sedis	g__Fungi_gen_Incertae_sedis	s__Fungi_sp
OTU0484	MOSTABUND | n=2/1	0	2	0	0	0	FM173097	SH0974823.10FU	3.00955e-077	291.629	322	1	191	359	548	180	180	94.2	99	193	k__Fungi	p__Ascomycota	c__Eurotiomycetes	o__Chaetothyriales	f__Herpotrichiellaceae	g__Exophiala	s__Exophiala_sp
OTU0485	MOSTABUND | n=2/2	0	0	0	0	2	UDB07142349	SH0742454.10FU	1.27856e-094	349.336	386	1	193	336	528	193	193	100	100	193	k__Fungi	p__Mucoromycota	c__Umbelopsidomycetes	o__Umbelopsidales	f__Umbelopsidaceae	g__Umbelopsis	s__Umbelopsis_sp
OTU0486	MOSTABUND | n=2/2	0	0	0	0	2	KC965837	SH0979180.10FU	7.25585e-071	269.988	298	1	149	345	493	149	149	100	100	149	k__Fungi	p__Ascomycota	c__Dothideomycetes	o__Dothideomycetes_ord_Incertae_sedis	f__Dothideomycetes_fam_Incertae_sedis	g__Dothideomycetes_gen_Incertae_sedis	s__Dothideomycetes_sp
OTU0487	MOSTABUND | n=2/2	0	0	0	2	0	OP023165	SH0896300.10FU	7.25585e-071	269.988	298	1	149	313	461	149	149	100	100	149	k__Fungi	p__Ascomycota	c__Dothideomycetes	o__Pleosporales	f__Amorosiaceae	g__Angustimassarina	s__Angustimassarina_sp
OTU0488	MOSTABUND | n=2/1	1	1	0	0	0
OTU0489	MOSTABUND | n=2/2	0	0	0	2	0	KC222869	SH0964280.10FU	1.76784e-093	345.73	382	1	215	514	721	207	207	96.3	100	215	k__Fungi	p__Glomeromycota	c__Glomeromycetes	o__Glomerales	f__Glomeraceae	g__Glomeraceae_gen_Incertae_sedis	s__Glomeraceae_sp
OTU0490	MOSTABUND | n=2/2	0	0	0	2	0	UDB02262797	SH1000853.10FU	5.74279e-106	387.207	428	1	214	307	520	214	214	100	100	214	k__Fungi	p__Chytridiomycota	c__Chytridiomycota_cls_Incertae_sedis	o__Chytridiomycota_ord_Incertae_sedis	f__Chytridiomycota_fam_Incertae_sedis	g__Chytridiomycota_gen_Incertae_sedis	s__Chytridiomycota_sp
OTU0491	MOSTABUND | n=2/2	0	0	0	0	2	OL678175	SH0960558.10FU	2.86404e-123	444.915	492	1	246	308	553	246	246	100	100	246	k__Fungi	p__Mortierellomycota	c__Mortierellomycetes	o__Mortierellales	f__Mortierellaceae	g__Mortierella	s__Mortierella_sp
OTU0492	MOSTABUND | n=2/2	0	1	1	0	0	MT872624	SH0912804.10FU	8.9947e-051	203.264	224	1	151	578	729	137	137	90.7	100	151	k__Fungi	p__Ascomycota	c__Eurotiomycetes	o__Eurotiomycetes_ord_Incertae_sedis	f__Eurotiomycetes_fam_Incertae_sedis	g__Eurotiomycetes_gen_Incertae_sedis	s__Eurotiomycetes_sp
OTU0493	MOSTABUND | n=2/1	0	0	0	2	0	UDB07339899	SH0962347.10FU	6.05523e-072	273.595	302	1	151	464	614	151	151	100	100	151	k__Fungi	p__Ascomycota	c__Dothideomycetes	o__Cladosporiales	f__Cladosporiaceae	g__Verrucocladosporium	s__Verrucocladosporium_sp
OTU0494	MOSTABUND | n=2/2	0	0	0	2	0	UDB04223532	SH1034170.10FU	2.97785e-136	488.196	540	1	270	481	750	270	270	100	100	270	k__Fungi	p__Monoblepharomycota	c__Monoblepharidomycetes	o__Monoblepharidales	f__Monoblepharidales_fam_Incertae_sedis	g__Monoblepharidales_gen_Incertae_sedis	s__Monoblepharidales_sp
OTU0495	MOSTABUND | n=2/2	1	1	0	0	0	UDB06914778	SH0946025.10FU	8.62607e-051	203.264	224	1	143	319	464	135	135	94.4	97.9	146	k__Fungi	p__Ascomycota	c__Leotiomycetes	o__Leotiales	f__Tympanidaceae	g__Tympanidaceae_gen_Incertae_sedis	s__Tympanidaceae_sp
OTU0496	MOSTABUND | n=2/1	0	0	0	0	2	MT146460	SH0920726.10FU	3.95358e-108	394.421	436	1	218	365	582	218	218	100	100	218	k__Fungi	p__Basidiomycota	c__Agaricomycetes	o__Thelephorales	f__Thelephoraceae	g__Tomentella	s__Tomentella_subclavigera
OTU0497	MOSTABUND | n=2/2	0	0	0	0	2	UDB01520223	SH1025071.10FU	4.1719e-121	437.702	484	1	242	378	619	242	242	100	100	242	k__Fungi	p__Mucoromycota	c__Mucoromycotina_cls_Incertae_sedis	o__Mucoromycotina_ord_Incertae_sedis	f__Mucoromycotina_fam_Incertae_sedis	g__Bifiguratus	s__Bifiguratus_sp
OTU0498	MOSTABUND | n=2/2	0	0	0	2	0	UDB05058932	SH0959893.10FU	9.24531e-063	242.938	268	1	139	287	425	137	137	98.6	100	139	k__Fungi	p__Ascomycota	c__Leotiomycetes	o__Helotiales	f__Pleuroascaceae	g__Pleuroascaceae_gen_Incertae_sedis	s__Pleuroascaceae_sp
OTU0499	MOSTABUND | n=2/1	0	0	2	0	0	MT872624	SH0912804.10FU	3.5234e-043	178.016	196	1	149	578	729	133	133	89.3	100	149	k__Fungi	p__Ascomycota	c__Eurotiomycetes	o__Eurotiomycetes_ord_Incertae_sedis	f__Eurotiomycetes_fam_Incertae_sedis	g__Eurotiomycetes_gen_Incertae_sedis	s__Eurotiomycetes_sp
OTU0500	MOSTABUND | n=2/1	1	0	1	0	0	UDB03689247	SH0821637.10FU	9.06042e-070	266.382	294	3	152	374	523	149	149	99.3	98.7	152	k__Fungi	p__Ascomycota	c__Dothideomycetes	o__Pleosporales	f__Phaeosphaeriaceae	g__Paraphoma	s__Paraphoma_sp
OTU0501	MOSTABUND | n=2/2	0	0	0	2	0	OR727948	SH0753078.10FU	1.13874e-108	396.224	438	1	219	342	560	219	219	100	100	219	k__Fungi	p__Basidiomycota	c__Tremellomycetes	o__Cystofilobasidiales	f__Mrakiaceae	g__Tausonia	s__Tausonia_pullulans
OTU0502	MOSTABUND | n=2/1	0	0	2	0	0	MT809280	SH0737869.10FU	4.73157e-067	257.365	284	1	152	350	501	148	148	97.4	99.3	153	k__Fungi	p__Ascomycota	c__Sareomycetes	o__Sareales	f__Sareaceae	g__Sarea	s__Sarea_sp
OTU0503	MOSTABUND | n=2/2	0	0	0	2	0	UDB04415228	SH0986663.10FU	4.8506e-087	324.089	358	1	184	322	504	183	183	99.5	100	184	k__Fungi	p__Basidiomycota	c__Agaricomycetes	o__Agaricales	f__Cortinariaceae	g__Cortinarius	s__Cortinarius_sp
OTU0504	MOSTABUND | n=2/1	1	0	1	0	0	LC639279	SH0946103.10FU	1.3846e-060	235.724	260	1	135	370	504	133	133	98.5	96.4	140	k__Fungi	p__Ascomycota	c__Leotiomycetes	o__Helotiales	f__Myxotrichaceae	g__Oidiodendron	s__Oidiodendron_griseum
OTU0505	MOSTABUND | n=2/1	0	2	0	0	0	MW180937	SH0868962.10FU	9.83984e-057	223.101	246	1	153	370	532	147	147	96.1	99.4	154	k__Fungi	p__Ascomycota	c__Sordariomycetes	o__Diaporthales	f__Cytosporaceae	g__Cytospora	s__Cytospora_punicae
OTU0506	MOSTABUND | n=2/2	0	0	0	0	2	UDB01522705	SH0941024.10FU	9.78808e-083	309.662	342	1	171	318	488	171	171	100	100	171	k__Fungi	p__Ascomycota	c__Sordariomycetes	o__Hypocreales	f__Bionectriaceae	g__Bionectriaceae_gen_Incertae_sedis	s__Bionectriaceae_sp
OTU0507	MOSTABUND | n=2/1	0	1	1	0	0	GU062229	SH0926075.10FU	9.96944e-117	423.275	468	1	256	307	561	248	248	96.9	98.5	260	k__Fungi	p__Basidiomycota	c__Basidiomycota_cls_Incertae_sedis	o__Basidiomycota_ord_Incertae_sedis	f__Basidiomycota_fam_Incertae_sedis	g__Basidiomycota_gen_Incertae_sedis	s__Basidiomycota_sp
OTU0508	MOSTABUND | n=2/2	0	0	0	1	1	KU581093	SH1043932.10FU	2.07344e-058	228.511	252	1	141	415	557	138	138	97.9	100	141	k__Fungi	p__Fungi_phy_Incertae_sedis	c__Fungi_cls_Incertae_sedis	o__Fungi_ord_Incertae_sedis	f__Fungi_fam_Incertae_sedis	g__Fungi_gen_Incertae_sedis	s__Fungi_sp
OTU0509	MOSTABUND | n=2/2	0	0	0	0	2	OR755780	SH0856386.10FU	4.21375e-074	280.808	310	1	155	353	507	155	155	100	100	155	k__Fungi	p__Ascomycota	c__Dothideomycetes	o__Pleosporales	f__Pleosporaceae	g__Alternaria	s__Alternaria_alternata
OTU0510	MOSTABUND | n=2/2	0	0	0	1	1	UDB06355971	SH0841145.10FU	3.27982e-109	398.027	440	1	220	360	579	220	220	100	100	220	k__Fungi	p__Basidiomycota	c__Agaricomycetes	o__Trechisporales	f__Hydnodontaceae	g__Trechispora	s__Trechispora_sp
OTU0511	MOSTABUND | n=2/2	0	0	0	2	0	UDB07175125	SH0806652.10FU	3.27982e-109	398.027	440	1	220	334	553	220	220	100	100	220	k__Fungi	p__Mucoromycota	c__Umbelopsidomycetes	o__Umbelopsidales	f__Umbelopsidaceae	g__Umbelopsis	s__Umbelopsis_sp
OTU0512	MOSTABUND | n=2/1	0	0	2	0	0	KU948765	SH0845488.10FU	2.53325e-059	232.118	256	1	182	261	442	164	164	90.1	92.4	197	k__Fungi	p__Basidiomycota	c__Cystobasidiomycetes	o__Cystobasidiomycetes_ord_Incertae_sedis	f__Cystobasidiomycetes_fam_Incertae_sedis	g__Cystobasidiomycetes_gen_Incertae_sedis	s__Cystobasidiomycetes_sp
OTU0513	MOSTABUND | n=2/2	0	0	0	1	1	OP498053	SH0928930.10FU	1.21684e-074	282.612	312	1	156	357	512	156	156	100	100	156	k__Fungi	p__Ascomycota	c__Sordariomycetes	o__Hypocreales	f__Nectriaceae	g__Varicosporellopsis	s__Varicosporellopsis_aquatilis
OTU0514	MOSTABUND | n=2/1	0	0	0	0	2	UDB01403079	SH1045563.10FU	1.31061e-061	239.331	264	1	157	311	467	147	147	93.6	100	157	k__Fungi	p__Ascomycota	c__Ascomycota_cls_Incertae_sedis	o__Ascomycota_ord_Incertae_sedis	f__Ascomycota_fam_Incertae_sedis	g__Ascomycota_gen_Incertae_sedis	s__Ascomycota_sp
OTU0515	MOSTABUND | n=2/1	1	0	1	0	0	MT813951	SH0950131.10FU	2.09304e-065	251.955	278	1	156	192	346	150	150	96.2	98.7	158	k__Fungi	p__Ascomycota	c__Xylonomycetes	o__Symbiotaphrinales	f__Symbiotaphrinaceae	g__Symbiotaphrina	s__Symbiotaphrina_microtheca
OTU0516	MOSTABUND | n=2/2	0	0	0	0	2	MG920353	SH0988365.10FU	6.04645e-079	297.039	328	1	168	365	533	168	168	100	100	168	k__Fungi	p__Fungi_phy_Incertae_sedis	c__Fungi_cls_Incertae_sedis	o__Fungi_ord_Incertae_sedis	f__Fungi_fam_Incertae_sedis	g__Fungi_gen_Incertae_sedis	s__Fungi_sp
OTU0517	MOSTABUND | n=2/1	0	0	2	0	0	UDB01571240	SH0947752.10FU	3.68345e-089	331.303	366	1	205	297	500	197	197	96.1	100	205	k__Fungi	p__Basidiomycota	c__Cystobasidiomycetes	o__Buckleyzymales	f__Buckleyzymaceae	g__Buckleyzyma	s__Buckleyzyma_sp
OTU0518	MOSTABUND | n=2/1	0	0	2	0	0	OQ422967	SH0743871.10FU	1.51743e-073	279.005	308	1	159	325	483	157	157	98.7	100	159	k__Fungi	p__Basidiomycota	c__Tremellomycetes	o__Tremellales	f__Naemateliaceae	g__Naematelia	s__Naematelia_encephala
OTU0519	MOSTABUND | n=2/2	0	0	0	0	2	UDB07550390	SH1012296.10FU	1.89994e-112	408.848	452	1	229	339	567	228	228	99.6	100	229	k__Fungi	p__Basidiomycota	c__Microbotryomycetes	o__Sporidiobolales	f__Sporidiobolales_fam_Incertae_sedis	g__Sporidiobolales_gen_Incertae_sedis	s__Sporidiobolales_sp
OTU0520	MOSTABUND | n=2/2	0	0	0	2	0	UDB06554366	SH0741012.10FU	6.04849e-047	190.64	210	1	159	318	474	139	139	87.4	100	159	k__Fungi	p__Ascomycota	c__Sordariomycetes	o__Hypocreales	f__Sarocladiaceae	g__Sarocladiaceae_gen_Incertae_sedis	s__Sarocladiaceae_sp
OTU0521	MOSTABUND | n=2/1	0	0	2	0	0	JN032542	SH0828390.10FU	3.59929e-056	221.297	244	1	158	401	559	145	145	91.8	98.8	160	k__Fungi	p__Ascomycota	c__Eurotiomycetes	o__Chaetothyriales	f__Chaetothyriales_fam_Incertae_sedis	g__Chaetothyriales_gen_Incertae_sedis	s__Chaetothyriales_sp
OTU0522	MOSTABUND | n=2/2	0	0	0	1	1	UDB03132425	SH0936958.10FU	2.29134e-111	405.241	448	1	227	311	537	226	226	99.6	100	227	k__Fungi	p__Basidiomycota	c__Agaricomycetes	o__Agaricales	f__Clavariaceae	g__Clavaria	s__Clavaria_sp
OTU0523	MOSTABUND | n=2/2	0	0	0	2	0	EF445987	SH0965748.10FU	9.64972e-070	266.382	294	1	160	399	558	155	155	96.9	100	160	k__Fungi	p__Ascomycota	c__Orbiliomycetes	o__Orbiliales	f__Orbiliaceae	g__Arthrobotrys	s__Arthrobotrys_brochopaga
OTU0524	MOSTABUND | n=2/1	0	1	1	0	0	KU580845	SH1015287.10FU	1.74757e-059	232.118	256	1	137	358	495	135	135	98.5	95.1	144	k__Fungi	p__Fungi_phy_Incertae_sedis	c__Fungi_cls_Incertae_sedis	o__Fungi_ord_Incertae_sedis	f__Fungi_fam_Incertae_sedis	g__Fungi_gen_Incertae_sedis	s__Fungi_sp
OTU0525	MOSTABUND | n=2/2	0	0	0	2	0	UDB07377686	SH0977664.10FU	7.95698e-111	403.438	446	1	226	359	584	225	225	99.6	100	226	k__Fungi	p__Chytridiomycota	c__Spizellomycetes	o__Spizellomycetales	f__Spizellomycetaceae	g__Spizellomyces	s__Spizellomyces_sp
OTU0526	MOSTABUND | n=2/1	0	0	1	1	0	UDB04470396	SH0966602.10FU	1.53162e-066	255.561	282	1	144	326	469	143	143	99.3	100	144	k__Fungi	p__Ascomycota	c__Leotiomycetes	o__Helotiales	f__Dermateaceae	g__Cryptosporiopsis	s__Cryptosporiopsis_sp
OTU0527	MOSTABUND | n=2/2	0	0	0	0	2	KU144601	SH1000512.10FU	1.44308e-067	259.168	286	1	161	361	521	154	154	95.7	100	161	k__Fungi	p__Ascomycota	c__Dothideomycetes	o__Capnodiales	f__Capnodiales_fam_Incertae_sedis	g__Capnodiales_gen_Incertae_sedis	s__Capnodiales_sp
OTU0528	MOSTABUND | n=2/1	1	0	1	0	0	OR752067	SH0940075.10FU	6.65083e-072	273.595	302	1	163	364	528	161	161	98.8	100	163	k__Fungi	p__Ascomycota	c__Eurotiomycetes	o__Eurotiales	f__Aspergillaceae	g__Aspergillus	s__Aspergillus_fumigatus
OTU0529	MOSTABUND | n=2/2	0	0	0	2	0	UDB086039	SH0884524.10FU	2.25645e-111	405.241	448	1	224	372	595	224	224	100	100	224	k__Fungi	p__Basidiomycota	c__Agaricomycetes	o__Boletales	f__Boletales_fam_Incertae_sedis	g__Boletales_gen_Incertae_sedis	s__Boletales_sp
OTU0530	MOSTABUND | n=2/1	2	0	0	0	0	MK163843	SH0881750.10FU	3.60202e-068	260.971	288	1	144	325	468	144	144	100	100	144	k__Fungi	p__Ascomycota	c__Leotiomycetes	o__Thelebolales	f__Pseudeurotiaceae	g__Pseudeurotium	s__Pseudeurotium_sp
OTU0531	MOSTABUND | n=2/1	0	0	0	2	0	UDB03057720	SH0733962.10FU	1.15682e-108	396.224	438	1	222	393	614	221	221	99.5	100	222	k__Fungi	p__Basidiomycota	c__Agaricomycetes	o__Boletales	f__Boletales_fam_Incertae_sedis	g__Leucogyrophana	s__Leucogyrophana_sp
OTU0532	MOSTABUND | n=2/1	0	0	0	0	2	UDB07633439	SH0990384.10FU	4.89182e-080	300.646	332	1	166	320	485	166	166	100	100	166	k__Fungi	p__Ascomycota	c__Sordariomycetes	o__Hypocreales	f__Hypocreales_fam_Incertae_sedis	g__Stilbella	s__Stilbella_sp
OTU0533	MOSTABUND | n=2/2	0	0	0	1	1	UDB0750510	SH0970013.10FU	5.60336e-093	343.926	380	1	198	360	557	195	195	98.5	100	198	k__Fungi	p__Fungi_phy_Incertae_sedis	c__Fungi_cls_Incertae_sedis	o__Fungi_ord_Incertae_sedis	f__Fungi_fam_Incertae_sedis	g__Fungi_gen_Incertae_sedis	s__Fungi_sp
OTU0534	MOSTABUND | n=2/1	0	0	0	1	1	UDB07161174	SH0806611.10FU	2.72058e-110	401.634	444	1	222	340	561	222	222	100	100	222	k__Fungi	p__Mucoromycota	c__Umbelopsidomycetes	o__Umbelopsidales	f__Umbelopsidaceae	g__Umbelopsis	s__Umbelopsis_sp
OTU0535	MOSTABUND | n=2/2	0	0	0	2	0	UDB04172592	SH0939722.10FU	1.0539e-075	286.219	316	1	163	337	499	161	161	98.8	100	163	k__Fungi	p__Ascomycota	c__Eurotiomycetes	o__Eurotiales	f__Aspergillaceae	g__Penicillium	s__Penicillium_sp
OTU0536	MOSTABUND | n=2/2	0	0	0	0	2	UDB07374353	SH0840889.10FU	2.51268e-084	315.072	348	1	184	362	545	180	180	97.8	100	184	k__Fungi	p__Ascomycota	c__Eurotiomycetes	o__Onygenales	f__Spiromastigaceae	g__Spiromastix	s__Spiromastix_sp
OTU0537	MOSTABUND | n=2/1	1	0	1	0	0	MT872624	SH0912804.10FU	1.09578e-049	199.657	220	1	151	578	729	136	136	90.1	100	151	k__Fungi	p__Ascomycota	c__Eurotiomycetes	o__Eurotiomycetes_ord_Incertae_sedis	f__Eurotiomycetes_fam_Incertae_sedis	g__Eurotiomycetes_gen_Incertae_sedis	s__Eurotiomycetes_sp
OTU0538	MOSTABUND | n=2/1	0	1	1	0	0	OR760519	SH0962330.10FU	1.30096e-067	259.168	286	1	148	329	476	146	146	98.6	100	148	k__Fungi	p__Ascomycota	c__Dothideomycetes	o__Cladosporiales	f__Cladosporiaceae	g__Cladosporium	s__Cladosporium_allicinum
OTU0539	MOSTABUND | n=2/1	0	0	2	0	0	MH188916	SH0926074.10FU	4.05741e-102	374.584	414	1	232	347	580	226	226	97.4	98.3	236	k__Fungi	p__Basidiomycota	c__Exobasidiomycetes	o__Exobasidiales	f__Exobasidiales_fam_Incertae_sedis	g__Guomyces	s__Guomyces_nicotianae
OTU0540	MOSTABUND | n=2/1	0	1	1	0	0	UDB04173865	SH0927678.10FU	1.56624e-087	325.893	360	1	205	308	512	195	195	95.1	100	205	k__Fungi	p__Basidiomycota	c__Microbotryomycetes	o__Microbotryomycetes_ord_Incertae_sedis	f__Microbotryomycetes_fam_Incertae_sedis	g__Microbotryomycetes_gen_Incertae_sedis	s__Microbotryomycetes_sp
OTU0541	MOSTABUND | n=2/2	0	0	0	1	1	OR127136	SH0857101.10FU	1.04097e-068	262.775	290	1	145	331	475	145	145	100	100	145	k__Fungi	p__Ascomycota	c__Sordariomycetes	o__Chaetosphaeriales	f__Chaetosphaeriaceae	g__Chloridium	s__Chloridium_gonytrichii
OTU0542	MOSTABUND | n=2/2	0	0	0	2	0	OQ448439	SH0953900.10FU	8.84246e-117	423.275	468	1	234	348	581	234	234	100	100	234	k__Fungi	p__Basidiomycota	c__Tremellomycetes	o__Filobasidiales	f__Piskurozymaceae	g__Solicoccozyma	s__Solicoccozyma_terricola
OTU0543	MOSTABUND | n=2/2	0	0	0	0	2	UDB04522296	SH0867736.10FU	3.91081e-096	354.747	392	1	223	303	524	213	213	95.5	92.1	242	k__Fungi	p__Mortierellomycota	c__Mortierellomycetes	o__Mortierellales	f__Mortierellaceae	g__Mortierella	s__Mortierella_sp
OTU0544	MOSTABUND | n=2/2	0	0	0	0	2	UDB01108623	SH0943293.10FU	1.85099e-092	342.123	378	1	189	334	522	189	189	100	100	189	k__Fungi	p__Basidiomycota	c__Agaricomycetes	o__Atheliales	f__Atheliaceae	g__Amphinema	s__Amphinema_sp
OTU0545	MOSTABUND | n=2/1	0	0	0	1	1	UDB025539	SH0882429.10FU	1.72581e-106	389.011	430	1	223	363	585	220	220	98.7	100	223	k__Fungi	p__Basidiomycota	c__Agaricomycetes	o__Thelephorales	f__Thelephoraceae	g__Thelephoraceae_gen_Incertae_sedis	s__Thelephoraceae_sp
OTU0546	MOSTABUND | n=2/2	0	0	0	0	2	UDB04465285	SH0740430.10FU	1.16887e-108	396.224	438	1	224	422	645	222	222	99.1	100	224	k__Fungi	p__Basidiomycota	c__Agaricomycetes	o__Agaricales	f__Stephanosporaceae	g__Cristinia	s__Cristinia_sp
OTU0547	MOSTABUND | n=2/1	1	0	1	0	0	MT872626	SH0912803.10FU	1.63816e-066	255.561	282	1	149	1577	1725	146	146	98	98	152	k__Fungi	p__Ascomycota	c__Eurotiomycetes	o__Eurotiomycetes_ord_Incertae_sedis	f__Eurotiomycetes_fam_Incertae_sedis	g__Eurotiomycetes_gen_Incertae_sedis	s__Eurotiomycetes_sp
OTU0548	MOSTABUND | n=2/1	0	0	0	0	2	OR965240	SH0939544.10FU	9.79704e-070	266.382	294	1	162	346	507	156	156	96.3	100	162	k__Fungi	p__Ascomycota	c__Eurotiomycetes	o__Eurotiales	f__Aspergillaceae	g__Penicillium	s__Penicillium_sp
OTU0549	MOSTABUND | n=2/1	1	1	0	0	0	MT872624	SH0912804.10FU	2.93779e-063	244.741	270	1	151	578	729	146	146	96.7	100	151	k__Fungi	p__Ascomycota	c__Eurotiomycetes	o__Eurotiomycetes_ord_Incertae_sedis	f__Eurotiomycetes_fam_Incertae_sedis	g__Eurotiomycetes_gen_Incertae_sedis	s__Eurotiomycetes_sp
OTU0550	MOSTABUND | n=2/2	0	0	0	0	2	OL338153	SH0830887.10FU	1.20994e-101	372.78	412	1	206	375	580	206	206	100	100	206	k__Fungi	p__Basidiomycota	c__Agaricomycetes	o__Agaricales	f__Entolomataceae	g__Entoloma	s__Entoloma_minutisporum
OTU0551	MOSTABUND | n=2/1	0	0	0	2	0	UDB04482676	SH0964089.10FU	3.13669e-069	264.578	292	1	151	330	480	149	149	98.7	100	151	k__Fungi	p__Ascomycota	c__Dothideomycetes	o__Pleosporales	f__Didymosphaeriaceae	g__Curreya	s__Curreya_sp
OTU0552	MOSTABUND | n=2/1	2	0	0	0	0	OR800251	SH0862152.10FU	1.79173e-072	275.398	304	1	155	331	485	154	154	99.4	100	155	k__Fungi	p__Ascomycota	c__Dothideomycetes	o__Pleosporales	f__Didymellaceae	g__Epicoccum	s__Epicoccum_sp
OTU0553	MOSTABUND | n=2/1	1	0	1	0	0	OR415647	SH0740357.10FU	8.45725e-077	289.825	320	1	160	394	553	160	160	100	100	160	k__Fungi	p__Ascomycota	c__Sordariomycetes	o__Hypocreales	f__Cordycipitaceae	g__Akanthomyces	s__Akanthomyces_lecanii
OTU0554	MOSTABUND | n=2/2	0	0	0	2	0	UDB01509611	SH0982543.10FU	1.10892e-115	419.668	464	1	240	306	545	237	237	98.8	100	240	k__Fungi	p__Chytridiomycota	c__Rhizophydiomycetes	o__Rhizophydiales	f__Alphamycetaceae	g__Betamyces	s__Betamyces_sp
OTU0555	SINGLETON | n=1	0	0	0	0	1	UDB02214019	SH0735594.10FU	2.0345e-078	295.235	326	1	163	323	485	163	163	100	100	163	k__Fungi	p__Ascomycota	c__Sordariomycetes	o__Hypocreales	f__Nectriaceae	g__Fusarium	s__Fusarium_sp
OTU0556	SINGLETON | n=1	1	0	0	0	0	UDB01441599	SH0878054.10FU	1.07749e-075	286.219	316	4	166	347	509	161	161	98.8	98.2	166	k__Fungi	p__Ascomycota	c__Eurotiomycetes	o__Eurotiales	f__Aspergillaceae	g__Aspergillus	s__Aspergillus_sp
OTU0557	SINGLETON | n=1	0	1	0	0	0	EU030275	SH0828639.10FU	2.14172e-065	251.955	278	1	161	334	496	154	154	95.7	100	161	k__Fungi	p__Ascomycota	c__Eurotiomycetes	o__Chaetothyriales	f__Herpotrichiellaceae	g__Sorocybe	s__Sorocybe_resinae
OTU0558	SINGLETON | n=1	0	0	0	1	0	UDB03566142	SH0736242.10FU	4.38097e-074	280.808	310	1	160	312	471	158	158	98.8	100	160	k__Fungi	p__Ascomycota	c__Sordariomycetes	o__Hypocreales	f__Hypocreales_fam_Incertae_sedis	g__Hypocreales_gen_Incertae_sedis	s__Hypocreales_sp
OTU0559	SINGLETON | n=1	1	0	0	0	0	OR965242	SH0940637.10FU	7.70185e-065	250.151	276	1	143	336	478	141	141	98.6	86.7	165	k__Fungi	p__Ascomycota	c__Eurotiomycetes	o__Eurotiales	f__Aspergillaceae	g__Penicillium	s__Penicillium_sp
OTU0560	SINGLETON | n=1	0	0	1	0	0	MK782435	SH0905449.10FU	5.54082e-073	277.202	306	8	165	778	935	156	156	98.7	95.8	165	k__Fungi	p__Ascomycota	c__Leotiomycetes	o__Helotiales	f__Mollisiaceae	g__Phialocephala	s__Phialocephala_fluminis
OTU0561	SINGLETON | n=1	1	0	0	0	0	LC272919	SH0915560.10FU	1.36181e-061	239.331	264	1	162	362	525	153	153	94.4	100	162	k__Fungi	p__Ascomycota	c__Dothideomycetes	o__Myriangiales	f__Myriangiales_fam_Incertae_sedis	g__Myriangiales_gen_Incertae_sedis	s__Myriangiales_sp
OTU0562	SINGLETON | n=1	0	0	0	0	1	UDB03408790	SH0742514.10FU	7.04812e-078	293.432	324	1	162	303	464	162	162	100	100	162	k__Fungi	p__Ascomycota	c__Pezizomycotina_cls_Incertae_sedis	o__Pezizomycotina_ord_Incertae_sedis	f__Pezizomycotina_fam_Incertae_sedis	g__Hormiactis	s__Hormiactis_sp
OTU0563	SINGLETON | n=1	0	0	0	1	0	UDB04201389	SH0939438.10FU	8.0419e-071	269.988	298	1	162	331	492	157	157	96.9	100	162	k__Fungi	p__Ascomycota	c__Eurotiomycetes	o__Eurotiales	f__Aspergillaceae	g__Penicillium	s__Penicillium_sp
OTU0564	SINGLETON | n=1	0	0	1	0	0	KU144551	SH1038762.10FU	2.32753e-014	82.4379	90	1	152	293	449	119	119	78.3	93.3	163	k__Fungi	p__Ascomycota	c__Saccharomycetes	o__Saccharomycetales	f__Trichomonascaceae	g__Zygoascus	s__Zygoascus_sp
OTU0565	SINGLETON | n=1	0	0	0	0	1	UDB04472702	SH0826060.10FU	2.06852e-040	169	186	1	150	279	430	130	130	86.7	90.9	165	k__Fungi	p__Basidiomycota	c__Tremellomycetes	o__Tremellales	f__Cuniculitremaceae	g__Cuniculitremaceae_gen_Incertae_sedis	s__Cuniculitremaceae_sp
OTU0566	SINGLETON | n=1	0	0	0	0	1
OTU0567	SINGLETON | n=1	0	0	0	1	0	UDB01802707	SH1015085.10FU	5.11315e-067	257.365	284	1	163	334	498	158	158	96.9	100	163	k__Fungi	p__Ascomycota	c__Eurotiomycetes	o__Chaetothyriales	f__Chaetothyriales_fam_Incertae_sedis	g__Chaetothyriales_gen_Incertae_sedis	s__Chaetothyriales_sp
OTU0568	SINGLETON | n=1	0	0	1	0	0	PP033949	SH0960075.10FU	3.51376e-075	284.415	314	1	157	305	461	157	157	100	100	157	k__Fungi	p__Ascomycota	c__Dothideomycetes	o__Pleosporales	f__Coniothyriaceae	g__Coniothyrium	s__Coniothyrium_telephii
OTU0569	SINGLETON | n=1	0	0	0	0	1
OTU0570	SINGLETON | n=1	0	0	1	0	0	OR069551	SH0767731.10FU	2.32137e-071	271.792	300	1	163	331	493	158	158	96.9	100	163	k__Fungi	p__Ascomycota	c__Eurotiomycetes	o__Eurotiales	f__Aspergillaceae	g__Penicillium	s__Penicillium_corylophilum
OTU0571	SINGLETON | n=1	0	1	0	0	0	EU030275	SH0828639.10FU	4.26731e-030	134.736	148	15	161	346	492	118	118	80.3	89.1	165	k__Fungi	p__Ascomycota	c__Eurotiomycetes	o__Chaetothyriales	f__Herpotrichiellaceae	g__Sorocybe	s__Sorocybe_resinae
OTU0572	SINGLETON | n=1	1	0	0	0	0	OR752067	SH0940075.10FU	1.93393e-072	275.398	304	1	165	364	528	160	160	97	100	165	k__Fungi	p__Ascomycota	c__Eurotiomycetes	o__Eurotiales	f__Aspergillaceae	g__Aspergillus	s__Aspergillus_fumigatus
OTU0573	SINGLETON | n=1	0	0	0	0	1	UDB06655637	SH0950338.10FU	6.90132e-040	167.196	184	1	159	338	490	135	135	84.9	100	159	k__Fungi	p__Ascomycota	c__Pezizomycotina_cls_Incertae_sedis	o__Pezizomycotina_ord_Incertae_sedis	f__Pezizomycotina_fam_Incertae_sedis	g__Triscelophorus	s__Triscelophorus_sp
OTU0574	SINGLETON | n=1	0	0	1	0	0	FJ897698	SH0882528.10FU	3.73337e-075	284.415	314	1	162	160	321	160	160	98.8	98.2	165	k__Fungi	p__Ascomycota	c__Eurotiomycetes	o__Onygenales	f__Ajellomycetaceae	g__Histoplasma	s__Histoplasma_capsulatum
OTU0575	SINGLETON | n=1	0	0	0	0	1	PP053030	SH0940133.10FU	1.69495e-079	298.842	330	1	165	472	636	165	165	100	100	165	k__Fungi	p__Ascomycota	c__Eurotiomycetes	o__Eurotiales	f__Aspergillaceae	g__Aspergillus	s__Aspergillus_sp
OTU0576	SINGLETON | n=1	0	0	1	0	0	MZ133732	SH0875505.10FU	2.2714e-052	208.674	230	4	160	424	584	143	143	91.1	98.1	160	k__Fungi	p__Ascomycota	c__Eurotiomycetes	o__Onygenales	f__Gymnoascaceae	g__Gymnoascus	s__Gymnoascus_halophilus
OTU0577	SINGLETON | n=1	0	0	0	1	0	UDB01004456	SH0733167.10FU	1.79173e-072	275.398	304	1	155	604	758	154	154	99.4	100	155	k__Fungi	p__Ascomycota	c__Eurotiomycetes	o__Verrucariales	f__Verrucariaceae	g__Verrucaria	s__Verrucaria_viridula
OTU0578	SINGLETON | n=1	0	0	1	0	0	OR069551	SH0767731.10FU	1.90549e-072	275.398	304	1	162	331	492	158	158	97.5	99.4	163	k__Fungi	p__Ascomycota	c__Eurotiomycetes	o__Eurotiales	f__Aspergillaceae	g__Penicillium	s__Penicillium_corylophilum
OTU0579	SINGLETON | n=1	0	0	0	1	0	OQ211119	SH0990494.10FU	1.69495e-079	298.842	330	1	165	386	550	165	165	100	100	165	k__Fungi	p__Ascomycota	c__Sordariomycetes	o__Hypocreales	f__Bionectriaceae	g__Acremonium	s__Acremonium_charticola
OTU0580	SINGLETON | n=1	0	0	0	0	1	MH861037	SH0752308.10FU	4.162e-081	304.252	336	1	171	501	671	170	170	99.4	100	171	k__Fungi	p__Ascomycota	c__Pezizomycotina_cls_Incertae_sedis	o__Pezizomycotina_ord_Incertae_sedis	f__Pezizomycotina_fam_Incertae_sedis	g__Arcuadendron	s__Arcuadendron_triangulare
OTU0581	SINGLETON | n=1	0	0	0	1	0	UDB04183964	SH0957385.10FU	8.14165e-058	226.707	250	1	155	320	473	144	144	92.9	100	155	k__Fungi	p__Ascomycota	c__Dothideomycetes	o__Botryosphaeriales	f__Botryosphaeriaceae	g__Microdiplodia	s__Microdiplodia_sp
OTU0582	SINGLETON | n=1	1	0	0	0	0	OR069551	SH0767731.10FU	2.32137e-071	271.792	300	1	163	331	493	158	158	96.9	100	163	k__Fungi	p__Ascomycota	c__Eurotiomycetes	o__Eurotiales	f__Aspergillaceae	g__Penicillium	s__Penicillium_corylophilum
OTU0583	SINGLETON | n=1	0	0	0	0	1	UDB05792098	SH1006324.10FU	8.6315e-045	183.427	202	1	154	336	488	135	135	87.7	100	154	k__Fungi	p__Ascomycota	c__Dothideomycetes	o__Pleosporales	f__Cucurbitariaceae	g__Pyrenochaeta	s__Pyrenochaeta_sp
OTU0584	SINGLETON | n=1	0	0	0	0	1	OP178991	SH0901216.10FU	1.45907e-073	279.005	308	1	154	399	552	154	154	100	100	154	k__Fungi	p__Ascomycota	c__Eurotiomycetes	o__Eurotiales	f__Trichocomaceae	g__Talaromyces	s__Talaromyces_albobiverticillius
OTU0585	SINGLETON | n=1	1	0	0	0	0	EU030275	SH0828639.10FU	1.46494e-067	259.168	286	1	163	334	496	155	155	95.1	100	163	k__Fungi	p__Ascomycota	c__Eurotiomycetes	o__Chaetothyriales	f__Herpotrichiellaceae	g__Sorocybe	s__Sorocybe_resinae
OTU0586	SINGLETON | n=1	0	0	0	1	0	OK383456	SH0957444.10FU	6.20413e-072	273.595	302	1	154	345	498	153	153	99.4	100	154	k__Fungi	p__Ascomycota	c__Dothideomycetes	o__Pleosporales	f__Didymosphaeriaceae	g__Kalmusia	s__Kalmusia_variispora
OTU0587	SINGLETON | n=1	0	0	0	1	0	OP675983	SH1002326.10FU	9.78808e-083	309.662	342	1	171	349	519	171	171	100	100	171	k__Fungi	p__Ascomycota	c__Sordariomycetes	o__Glomerellales	f__Plectosphaerellaceae	g__Furcasterigmium	s__Furcasterigmium_furcatum
OTU0588	SINGLETON | n=1	0	0	0	0	1	OR965240	SH0939544.10FU	9.87071e-070	266.382	294	1	157	346	504	155	155	98.7	96.3	163	k__Fungi	p__Ascomycota	c__Eurotiomycetes	o__Eurotiales	f__Aspergillaceae	g__Penicillium	s__Penicillium_sp
OTU0589	SINGLETON | n=1	0	1	0	0	0	OR569668	SH0991327.10FU	2.14813e-071	271.792	300	1	153	356	508	152	152	99.3	100	153	k__Fungi	p__Ascomycota	c__Dothideomycetes	o__Pleosporales	f__Didymosphaeriaceae	g__Pseudopithomyces	s__Pseudopithomyces_chartarum
OTU0590	SINGLETON | n=1	0	0	1	0	0	OR623243	SH0958738.10FU	1.00917e-069	266.382	294	1	166	289	451	160	160	96.4	100	166	k__Fungi	p__Ascomycota	c__Saccharomycetes	o__Saccharomycetales	f__Trichomonascaceae	g__Blastobotrys	s__Blastobotrys_sp
OTU0591	SINGLETON | n=1	0	0	1	0	0	OQ718080	SH0738016.10FU	2.98595e-063	244.741	270	6	153	378	525	143	143	96.6	96.7	153	k__Fungi	p__Ascomycota	c__Sareomycetes	o__Sareales	f__Sareaceae	g__Sarea	s__Sarea_coeloplata
OTU0592	SINGLETON | n=1	0	1	0	0	0	EU030275	SH0828639.10FU	6.22909e-066	253.758	280	1	163	334	496	154	154	94.5	100	163	k__Fungi	p__Ascomycota	c__Eurotiomycetes	o__Chaetothyriales	f__Herpotrichiellaceae	g__Sorocybe	s__Sorocybe_resinae
OTU0593	SINGLETON | n=1	1	0	0	0	0	EU030275	SH0828639.10FU	1.2025e-068	262.775	290	1	163	334	496	156	156	95.7	100	163	k__Fungi	p__Ascomycota	c__Eurotiomycetes	o__Chaetothyriales	f__Herpotrichiellaceae	g__Sorocybe	s__Sorocybe_resinae
OTU0594	SINGLETON | n=1	0	0	0	0	1	UDB05275634	SH0883341.10FU	5.05192e-073	277.202	306	1	153	310	462	153	153	100	100	153	k__Fungi	p__Ascomycota	c__Dothideomycetes	o__Botryosphaeriales	f__Botryosphaeriaceae	g__Dothiorella	s__Dothiorella_sp
OTU0595	SINGLETON | n=1	0	0	1	0	0	MT872624	SH0912804.10FU	1.99569e-065	251.955	278	1	152	578	729	147	147	96.7	100	152	k__Fungi	p__Ascomycota	c__Eurotiomycetes	o__Eurotiomycetes_ord_Incertae_sedis	f__Eurotiomycetes_fam_Incertae_sedis	g__Eurotiomycetes_gen_Incertae_sedis	s__Eurotiomycetes_sp
OTU0596	SINGLETON | n=1	0	0	1	0	0	MT872624	SH0912804.10FU	2.43125e-064	248.348	274	1	152	578	729	146	146	96.1	100	152	k__Fungi	p__Ascomycota	c__Eurotiomycetes	o__Eurotiomycetes_ord_Incertae_sedis	f__Eurotiomycetes_fam_Incertae_sedis	g__Eurotiomycetes_gen_Incertae_sedis	s__Eurotiomycetes_sp
OTU0597	SINGLETON | n=1	0	0	0	0	1	UDB0750443	SH1020513.10FU	2.4334e-045	185.23	204	1	152	346	499	134	134	88.2	100	152	k__Fungi	p__Fungi_phy_Incertae_sedis	c__Fungi_cls_Incertae_sedis	o__Fungi_ord_Incertae_sedis	f__Fungi_fam_Incertae_sedis	g__Fungi_gen_Incertae_sedis	s__Fungi_sp
OTU0598	SINGLETON | n=1	0	0	0	0	1	KP335617	SH0915258.10FU	6.68898e-040	167.196	184	1	155	328	480	133	133	85.8	100	155	k__Fungi	p__Fungi_phy_Incertae_sedis	c__Fungi_cls_Incertae_sedis	o__Fungi_ord_Incertae_sedis	f__Fungi_fam_Incertae_sedis	g__Fungi_gen_Incertae_sedis	s__Fungi_sp
OTU0599	SINGLETON | n=1	0	0	1	0	0	MT872624	SH0912804.10FU	1.99569e-065	251.955	278	1	152	578	729	147	147	96.7	100	152	k__Fungi	p__Ascomycota	c__Eurotiomycetes	o__Eurotiomycetes_ord_Incertae_sedis	f__Eurotiomycetes_fam_Incertae_sedis	g__Eurotiomycetes_gen_Incertae_sedis	s__Eurotiomycetes_sp
OTU0600	SINGLETON | n=1	0	1	0	0	0	OP437840	SH0801479.10FU	2.0345e-078	295.235	326	1	163	364	526	163	163	100	100	163	k__Fungi	p__Ascomycota	c__Eurotiomycetes	o__Phaeomoniellales	f__Celotheliaceae	g__Neophaeomoniella	s__Neophaeomoniella_zymoides
OTU0601	SINGLETON | n=1	0	1	0	0	0	EU030275	SH0828639.10FU	6.22909e-066	253.758	280	1	163	334	496	154	154	94.5	100	163	k__Fungi	p__Ascomycota	c__Eurotiomycetes	o__Chaetothyriales	f__Herpotrichiellaceae	g__Sorocybe	s__Sorocybe_resinae
OTU0602	SINGLETON | n=1	0	0	0	0	1	KU314982	SH0860927.10FU	4.21375e-074	280.808	310	1	155	324	478	155	155	100	100	155	k__Fungi	p__Ascomycota	c__Dothideomycetes	o__Pleosporales	f__Lophiotremataceae	g__Lophiotrema	s__Lophiotrema_rubi
OTU0603	SINGLETON | n=1	0	0	0	0	1	PP151204	SH0940202.10FU	4.51474e-074	280.808	310	1	164	392	556	162	162	98.8	100	164	k__Fungi	p__Ascomycota	c__Eurotiomycetes	o__Eurotiales	f__Aspergillaceae	g__Penicillium	s__Penicillium_sp
OTU0604	SINGLETON | n=1	0	0	0	0	1	UDB02353617	SH0905531.10FU	3.39231e-082	307.859	340	1	170	367	536	170	170	100	100	170	k__Fungi	p__Ascomycota	c__Eurotiomycetes	o__Chaetothyriales	f__Trichomeriaceae	g__Knufia	s__Knufia_sp
OTU0605	SINGLETON | n=1	1	0	0	0	0	MK782435	SH0905449.10FU	4.51474e-074	280.808	310	1	164	771	935	162	162	98.8	100	164	k__Fungi	p__Ascomycota	c__Leotiomycetes	o__Helotiales	f__Mollisiaceae	g__Phialocephala	s__Phialocephala_fluminis
OTU0606	SINGLETON | n=1	0	0	0	0	1	UDB05112911	SH0845147.10FU	6.05523e-072	273.595	302	1	151	292	442	151	151	100	100	151	k__Fungi	p__Ascomycota	c__Sordariomycetes	o__Sordariales	f__Podosporaceae	g__Podospora	s__Podospora_sp
OTU0607	SINGLETON | n=1	1	0	0	0	0	MK782305	SH0850121.10FU	6.35864e-053	210.477	232	1	157	323	490	151	151	96.2	100	157	k__Fungi	p__Ascomycota	c__Saccharomycetes	o__Saccharomycetales	f__Saccharomycetales_fam_Incertae_sedis	g__Saccharomycetales_gen_Incertae_sedis	s__Saccharomycetales_sp
OTU0608	SINGLETON | n=1	0	0	0	1	0	UDB02924544	SH0906515.10FU	6.05523e-072	273.595	302	1	151	302	452	151	151	100	100	151	k__Fungi	p__Ascomycota	c__Geoglossomycetes	o__Geoglossales	f__Geoglossaceae	g__Geoglossum	s__Geoglossum_sp
OTU0609	SINGLETON | n=1	0	0	0	1	0	UDB0837729	SH1002392.10FU	1.83366e-060	235.724	260	1	175	311	487	160	160	91.4	99.4	176	k__Fungi	p__Ascomycota	c__Sordariomycetes	o__Hypocreales	f__Bionectriaceae	g__Acremonium	s__Acremonium_sp
OTU0610	SINGLETON | n=1	0	0	1	0	0	LC646014	SH0801449.10FU	2.0345e-078	295.235	326	1	163	348	510	163	163	100	100	163	k__Fungi	p__Ascomycota	c__Eurotiomycetes	o__Phaeomoniellales	f__Celotheliaceae	g__Phaeomoniella	s__Phaeomoniella_sp
OTU0611	SINGLETON | n=1	0	0	1	0	0	EU030275	SH0828639.10FU	6.22909e-066	253.758	280	1	163	334	496	154	154	94.5	100	163	k__Fungi	p__Ascomycota	c__Eurotiomycetes	o__Chaetothyriales	f__Herpotrichiellaceae	g__Sorocybe	s__Sorocybe_resinae
OTU0612	SINGLETON | n=1	0	0	1	0	0	UDB02024631	SH0851402.10FU	9.60368e-057	223.101	246	1	150	323	470	141	141	94	99.3	151	k__Fungi	p__Ascomycota	c__Dothideomycetes	o__Mycosphaerellales	f__Neodevriesiaceae	g__Neodevriesia	s__Neodevriesia_sp
OTU0613	SINGLETON | n=1	0	0	0	1	0	OR761542	SH0878052.10FU	5.87245e-079	297.039	328	1	164	273	436	164	164	100	100	164	k__Fungi	p__Ascomycota	c__Leotiomycetes	o__Helotiales	f__Erysiphaceae	g__Blumeria	s__Blumeria_graminis
OTU0614	SINGLETON | n=1	1	0	0	0	0	MT872624	SH0912804.10FU	2.93779e-063	244.741	270	1	151	578	729	146	146	96.7	100	151	k__Fungi	p__Ascomycota	c__Eurotiomycetes	o__Eurotiomycetes_ord_Incertae_sedis	f__Eurotiomycetes_fam_Incertae_sedis	g__Eurotiomycetes_gen_Incertae_sedis	s__Eurotiomycetes_sp
OTU0615	SINGLETON | n=1	1	0	0	0	0	UDB03795961	SH0767731.10FU	2.35601e-071	271.792	300	1	165	332	496	159	159	96.4	100	165	k__Fungi	p__Ascomycota	c__Eurotiomycetes	o__Eurotiales	f__Aspergillaceae	g__Penicillium	s__Penicillium_sp
OTU0616	SINGLETON | n=1	0	0	1	0	0	MT872624	SH0912804.10FU	9.53338e-038	159.983	176	1	150	578	729	128	128	85.3	100	150	k__Fungi	p__Ascomycota	c__Eurotiomycetes	o__Eurotiomycetes_ord_Incertae_sedis	f__Eurotiomycetes_fam_Incertae_sedis	g__Eurotiomycetes_gen_Incertae_sedis	s__Eurotiomycetes_sp
OTU0617	SINGLETON | n=1	0	1	0	0	0	ON261297	SH0767731.10FU	2.2694e-071	271.792	300	1	160	339	497	157	157	98.1	100	160	k__Fungi	p__Ascomycota	c__Eurotiomycetes	o__Eurotiales	f__Aspergillaceae	g__Penicillium	s__Penicillium_citreonigrum
OTU0618	SINGLETON | n=1	0	1	0	0	0	EU030275	SH0828639.10FU	3.93099e-062	241.134	266	1	163	334	496	151	151	92.6	100	163	k__Fungi	p__Ascomycota	c__Eurotiomycetes	o__Chaetothyriales	f__Herpotrichiellaceae	g__Sorocybe	s__Sorocybe_resinae
OTU0619	SINGLETON | n=1	0	0	1	0	0	MT872624	SH0912804.10FU	1.32516e-029	132.932	146	1	150	578	729	122	122	81.3	100	150	k__Fungi	p__Ascomycota	c__Eurotiomycetes	o__Eurotiomycetes_ord_Incertae_sedis	f__Eurotiomycetes_fam_Incertae_sedis	g__Eurotiomycetes_gen_Incertae_sedis	s__Eurotiomycetes_sp
OTU0620	SINGLETON | n=1	1	0	0	0	0	MT872624	SH0912804.10FU	7.82547e-039	163.589	180	1	150	578	729	129	129	86	100	150	k__Fungi	p__Ascomycota	c__Eurotiomycetes	o__Eurotiomycetes_ord_Incertae_sedis	f__Eurotiomycetes_fam_Incertae_sedis	g__Eurotiomycetes_gen_Incertae_sedis	s__Eurotiomycetes_sp
OTU0621	SINGLETON | n=1	1	0	0	0	0	MT872624	SH0912804.10FU	7.82547e-039	163.589	180	1	150	578	729	129	129	86	100	150	k__Fungi	p__Ascomycota	c__Eurotiomycetes	o__Eurotiomycetes_ord_Incertae_sedis	f__Eurotiomycetes_fam_Incertae_sedis	g__Eurotiomycetes_gen_Incertae_sedis	s__Eurotiomycetes_sp
OTU0622	SINGLETON | n=1	1	0	0	0	0	MT872624	SH0912804.10FU	7.82547e-039	163.589	180	1	150	578	729	129	129	86	100	150	k__Fungi	p__Ascomycota	c__Eurotiomycetes	o__Eurotiomycetes_ord_Incertae_sedis	f__Eurotiomycetes_fam_Incertae_sedis	g__Eurotiomycetes_gen_Incertae_sedis	s__Eurotiomycetes_sp
OTU0623	SINGLETON | n=1	1	0	0	0	0	MT872624	SH0912804.10FU	2.24204e-039	165.393	182	3	150	580	729	128	128	86.5	98.7	150	k__Fungi	p__Ascomycota	c__Eurotiomycetes	o__Eurotiomycetes_ord_Incertae_sedis	f__Eurotiomycetes_fam_Incertae_sedis	g__Eurotiomycetes_gen_Incertae_sedis	s__Eurotiomycetes_sp
OTU0624	SINGLETON | n=1	0	1	0	0	0	MT872624	SH0912804.10FU	6.8645e-027	123.915	136	1	150	578	729	120	120	80	100	150	k__Fungi	p__Ascomycota	c__Eurotiomycetes	o__Eurotiomycetes_ord_Incertae_sedis	f__Eurotiomycetes_fam_Incertae_sedis	g__Eurotiomycetes_gen_Incertae_sedis	s__Eurotiomycetes_sp
OTU0625	SINGLETON | n=1	0	1	0	0	0	MT809296	SH0737869.10FU	3.54962e-062	241.134	266	1	150	352	503	145	145	96.7	100	150	k__Fungi	p__Ascomycota	c__Sareomycetes	o__Sareales	f__Sareaceae	g__Sarea	s__Sarea_sp
OTU0626	SINGLETON | n=1	0	1	0	0	0	MT872624	SH0912804.10FU	7.82547e-039	163.589	180	1	150	578	729	129	129	86	100	150	k__Fungi	p__Ascomycota	c__Eurotiomycetes	o__Eurotiomycetes_ord_Incertae_sedis	f__Eurotiomycetes_fam_Incertae_sedis	g__Eurotiomycetes_gen_Incertae_sedis	s__Eurotiomycetes_sp
OTU0627	SINGLETON | n=1	0	0	1	0	0	OR069551	SH0767731.10FU	2.32137e-071	271.792	300	1	163	331	493	158	158	96.9	100	163	k__Fungi	p__Ascomycota	c__Eurotiomycetes	o__Eurotiales	f__Aspergillaceae	g__Penicillium	s__Penicillium_corylophilum
OTU0628	SINGLETON | n=1	0	0	1	0	0	MT872624	SH0912804.10FU	9.53338e-038	159.983	176	1	150	578	729	128	128	85.3	100	150	k__Fungi	p__Ascomycota	c__Eurotiomycetes	o__Eurotiomycetes_ord_Incertae_sedis	f__Eurotiomycetes_fam_Incertae_sedis	g__Eurotiomycetes_gen_Incertae_sedis	s__Eurotiomycetes_sp
OTU0629	SINGLETON | n=1	1	0	0	0	0	UDB07546800	SH0840188.10FU	4.40814e-024	114.899	126	1	179	299	477	135	135	75.4	100	179	k__Fungi	p__Basidiomycota	c__Microbotryomycetes	o__Sporidiobolales	f__Sporidiobolaceae	g__Sporidiobolaceae_gen_Incertae_sedis	s__Sporidiobolaceae_sp
OTU0630	SINGLETON | n=1	0	0	1	0	0	MT872624	SH0912804.10FU	3.54962e-062	241.134	266	1	150	578	729	145	145	96.7	100	150	k__Fungi	p__Ascomycota	c__Eurotiomycetes	o__Eurotiomycetes_ord_Incertae_sedis	f__Eurotiomycetes_fam_Incertae_sedis	g__Eurotiomycetes_gen_Incertae_sedis	s__Eurotiomycetes_sp
OTU0631	SINGLETON | n=1	0	1	0	0	0	UDB01788746	SH0870926.10FU	5.45933e-073	277.202	306	1	163	344	505	160	160	98.2	100	163	k__Fungi	p__Ascomycota	c__Eurotiomycetes	o__Chaetothyriales	f__Chaetothyriales_fam_Incertae_sedis	g__Chaetothyriales_gen_Incertae_sedis	s__Chaetothyriales_sp
OTU0632	SINGLETON | n=1	0	1	0	0	0	MT872624	SH0912804.10FU	7.82547e-039	163.589	180	1	150	578	729	129	129	86	100	150	k__Fungi	p__Ascomycota	c__Eurotiomycetes	o__Eurotiomycetes_ord_Incertae_sedis	f__Eurotiomycetes_fam_Incertae_sedis	g__Eurotiomycetes_gen_Incertae_sedis	s__Eurotiomycetes_sp
OTU0633	SINGLETON | n=1	0	0	1	0	0	MT872624	SH0912804.10FU	1.51067e-041	172.606	190	1	146	578	724	127	127	87	97.3	150	k__Fungi	p__Ascomycota	c__Eurotiomycetes	o__Eurotiomycetes_ord_Incertae_sedis	f__Eurotiomycetes_fam_Incertae_sedis	g__Eurotiomycetes_gen_Incertae_sedis	s__Eurotiomycetes_sp
OTU0634	SINGLETON | n=1	1	0	0	0	0	MT872624	SH0912804.10FU	2.22351e-039	165.393	182	1	149	578	729	130	130	87.2	100	149	k__Fungi	p__Ascomycota	c__Eurotiomycetes	o__Eurotiomycetes_ord_Incertae_sedis	f__Eurotiomycetes_fam_Incertae_sedis	g__Eurotiomycetes_gen_Incertae_sedis	s__Eurotiomycetes_sp
OTU0635	SINGLETON | n=1	0	0	0	1	0	OM808929	SH0738823.10FU	3.76195e-049	197.854	218	1	149	328	475	134	134	89.9	100	149	k__Fungi	p__Ascomycota	c__Leotiomycetes	o__Leotiales	f__Tympanidaceae	g__Claussenomyces	s__Claussenomyces_prasinulus
OTU0636	SINGLETON | n=1	0	1	0	0	0	LT976553	SH0938147.10FU	1.61153e-066	255.561	282	1	150	329	479	148	148	98.7	100	150	k__Fungi	p__Ascomycota	c__Dothideomycetes	o__Mycosphaerellales	f__Teratosphaeriaceae	g__Constantinomyces	s__Constantinomyces_oldenburgensis
OTU0637	SINGLETON | n=1	1	0	0	0	0	MH864788	SH0885672.10FU	5.42742e-080	300.646	332	1	181	357	536	176	176	97.2	100	181	k__Fungi	p__Ascomycota	c__Eurotiomycetes	o__Chaetothyriales	f__Herpotrichiellaceae	g__Rhinocladiella	s__Rhinocladiella_atrovirens
OTU0638	SINGLETON | n=1	0	0	0	0	1	OR365516	SH0904979.10FU	7.25585e-071	269.988	298	1	149	363	511	149	149	100	100	149	k__Fungi	p__Ascomycota	c__Sordariomycetes	o__Hypocreales	f__Nectriaceae	g__Fusarium	s__Fusarium_sp
OTU0639	SINGLETON | n=1	0	0	1	0	0	OQ383503	SH0966706.10FU	4.28859e-061	237.528	262	1	149	312	460	142	142	95.3	100	149	k__Fungi	p__Ascomycota	c__Leotiomycetes	o__Leotiales	f__Tympanidaceae	g__Pragmopora	s__Pragmopora_sp
OTU0640	SINGLETON | n=1	0	0	1	0	0	MT872624	SH0912804.10FU	1.84037e-040	169	186	1	150	578	729	130	130	86.7	100	150	k__Fungi	p__Ascomycota	c__Eurotiomycetes	o__Eurotiomycetes_ord_Incertae_sedis	f__Eurotiomycetes_fam_Incertae_sedis	g__Eurotiomycetes_gen_Incertae_sedis	s__Eurotiomycetes_sp
OTU0641	SINGLETON | n=1	0	0	1	0	0	AY795853	SH0838720.10FU	1.89603e-060	235.724	260	1	177	326	500	160	160	90.4	97.8	181	k__Fungi	p__Ascomycota	c__Eurotiomycetes	o__Mycocaliciales	f__Mycocaliciaceae	g__Chaenothecopsis	s__Chaenothecopsis_debilis
OTU0642	SINGLETON | n=1	0	0	0	1	0	KF309966	SH0938156.10FU	4.29238e-042	174.41	192	1	149	316	463	131	131	87.9	100	149	k__Fungi	p__Ascomycota	c__Dothideomycetes	o__Mycosphaerellales	f__Teratosphaeriaceae	g__Meristemomyces	s__Meristemomyces_frigidus
OTU0643	SINGLETON | n=1	0	0	0	1	0	OR760533	SH0962330.10FU	7.25585e-071	269.988	298	1	149	330	478	149	149	100	100	149	k__Fungi	p__Ascomycota	c__Dothideomycetes	o__Cladosporiales	f__Cladosporiaceae	g__Cladosporium	s__Cladosporium_halotolerans
OTU0644	SINGLETON | n=1	0	0	1	0	0	MT872624	SH0912804.10FU	2.22351e-039	165.393	182	1	149	578	729	129	129	86.6	100	149	k__Fungi	p__Ascomycota	c__Eurotiomycetes	o__Eurotiomycetes_ord_Incertae_sedis	f__Eurotiomycetes_fam_Incertae_sedis	g__Eurotiomycetes_gen_Incertae_sedis	s__Eurotiomycetes_sp
OTU0645	SINGLETON | n=1	0	0	1	0	0
OTU0646	SINGLETON | n=1	0	0	1	0	0	MK584975	SH0908381.10FU	3.26959e-056	221.297	244	1	140	429	568	133	133	95	94.6	148	k__Fungi	p__Ascomycota	c__Leotiomycetes	o__Helotiales	f__Hyaloscyphaceae	g__Scolecolachnum	s__Scolecolachnum_nigricans
OTU0647	SINGLETON | n=1	0	0	1	0	0	UDB0747127	SH0763677.10FU	5.53181e-066	253.758	280	1	148	323	470	145	145	98	100	148	k__Fungi	p__Ascomycota	c__Dothideomycetes	o__Mycosphaerellales	f__Neodevriesiaceae	g__Neodevriesia	s__Neodevriesia_sp
OTU0648	SINGLETON | n=1	1	0	0	0	0	MT872624	SH0912804.10FU	4.25661e-042	174.41	192	1	148	578	729	133	133	89.9	100	148	k__Fungi	p__Ascomycota	c__Eurotiomycetes	o__Eurotiomycetes_ord_Incertae_sedis	f__Eurotiomycetes_fam_Incertae_sedis	g__Eurotiomycetes_gen_Incertae_sedis	s__Eurotiomycetes_sp
OTU0649	SINGLETON | n=1	1	0	0	0	0	MT872624	SH0912804.10FU	7.82547e-039	163.589	180	1	150	578	729	129	129	86	100	150	k__Fungi	p__Ascomycota	c__Eurotiomycetes	o__Eurotiomycetes_ord_Incertae_sedis	f__Eurotiomycetes_fam_Incertae_sedis	g__Eurotiomycetes_gen_Incertae_sedis	s__Eurotiomycetes_sp
OTU0650	SINGLETON | n=1	0	0	0	0	1	UDB03307771	SH0738743.10FU	2.51144e-070	268.185	296	1	148	490	637	148	148	100	100	148	k__Fungi	p__Ascomycota	c__Leotiomycetes	o__Helotiales	f__Helotiales_fam_Incertae_sedis	g__Helotiales_gen_Incertae_sedis	s__Helotiales_sp
OTU0651	SINGLETON | n=1	0	0	1	0	0	UDB04349073	SH0846887.10FU	1.79316e-059	232.118	256	1	147	334	473	139	139	94.6	100	147	k__Fungi	p__Ascomycota	c__Pezizomycotina_cls_Incertae_sedis	o__Pezizomycotina_ord_Incertae_sedis	f__Pezizomycotina_fam_Incertae_sedis	g__Pezizomycotina_gen_Incertae_sedis	s__Pezizomycotina_sp
OTU0652	SINGLETON | n=1	0	0	0	0	1	OP179063	SH0991891.10FU	8.69211e-070	266.382	294	1	147	366	512	147	147	100	100	147	k__Fungi	p__Ascomycota	c__Dothideomycetes	o__Pleosporales	f__Pyrenochaetopsidaceae	g__Pyrenochaetopsis	s__Pyrenochaetopsis_leptospora
OTU0653	SINGLETON | n=1	0	0	0	0	1	UDB0961308	SH0963830.10FU	3.00814e-069	264.578	292	1	146	320	465	146	146	100	100	146	k__Fungi	p__Ascomycota	c__Leotiomycetes	o__Leotiales	f__Leotiales_fam_Incertae_sedis	g__Alatospora	s__Alatospora_sp
OTU0654	SINGLETON | n=1	0	0	0	0	1	OR481057	SH0963815.10FU	3.00814e-069	264.578	292	1	146	385	530	146	146	100	100	146	k__Fungi	p__Ascomycota	c__Leotiomycetes	o__Thelebolales	f__Pseudeurotiaceae	g__Pseudogymnoascus	s__Pseudogymnoascus_alpinus
OTU0655	SINGLETON | n=1	0	0	0	0	1	UDB01387686	SH0736466.10FU	8.07195e-064	246.544	272	1	146	314	459	142	142	97.3	100	146	k__Fungi	p__Ascomycota	c__Ascomycota_cls_Incertae_sedis	o__Ascomycota_ord_Incertae_sedis	f__Ascomycota_fam_Incertae_sedis	g__Ascomycota_gen_Incertae_sedis	s__Ascomycota_sp
OTU0656	SINGLETON | n=1	0	1	0	0	0	AF421209	SH1009772.10FU	1.33375e-067	259.168	286	1	151	335	485	148	148	98	100	151	k__Fungi	p__Ascomycota	c__Coniocybomycetes	o__Coniocybales	f__Coniocybaceae	g__Chaenotheca	s__Chaenotheca_xyloxena
OTU0657	SINGLETON | n=1	1	0	0	0	0	KX148023	SH0938147.10FU	9.06042e-070	266.382	294	1	152	321	472	150	150	98.7	100	152	k__Fungi	p__Ascomycota	c__Dothideomycetes	o__Mycosphaerellales	f__Teratosphaeriaceae	g__Constantinomyces	s__Constantinomyces_sp
OTU0658	SINGLETON | n=1	0	0	1	0	0	AY843109	SH0938058.10FU	1.27909e-067	259.168	286	1	146	311	456	145	145	99.3	100	146	k__Fungi	p__Ascomycota	c__Dothideomycetes	o__Mycosphaerellales	f__Teratosphaeriaceae	g__Constantinomyces	s__Constantinomyces_nebulosus
OTU0659	SINGLETON | n=1	0	0	1	0	0	UDB02020736	SH0843027.10FU	8.07195e-064	246.544	272	1	146	305	450	142	142	97.3	100	146	k__Fungi	p__Ascomycota	c__Dothideomycetes	o__Mycosphaerellales	f__Teratosphaeriaceae	g__Neocatenulostroma	s__Neocatenulostroma_sp
OTU0660	SINGLETON | n=1	0	0	0	1	0	UDB01531781	SH0948779.10FU	1.27909e-067	259.168	286	1	146	318	463	145	145	99.3	100	146	k__Fungi	p__Ascomycota	c__Leotiomycetes	o__Helotiales	f__Bloxamiaceae	g__Bloxamia	s__Bloxamia_sp
OTU0661	SINGLETON | n=1	0	0	0	1	0	UDB05286068	SH0897487.10FU	1.55825e-066	255.561	282	1	146	320	465	144	144	98.6	100	146	k__Fungi	p__Ascomycota	c__Leotiomycetes	o__Thelebolales	f__Pseudeurotiaceae	g__Pseudeurotium	s__Pseudeurotium_sp
OTU0662	SINGLETON | n=1	0	0	0	1	0	OR781402	SH0948646.10FU	3.00814e-069	264.578	292	1	146	356	501	146	146	100	100	146	k__Fungi	p__Ascomycota	c__Leotiomycetes	o__Helotiales	f__Dermateaceae	g__Pezicula	s__Pezicula_rhizophila
OTU0663	SINGLETON | n=1	0	0	1	0	0	MG520949	SH0740652.10FU	2.14813e-071	271.792	300	1	153	410	562	152	152	99.3	100	153	k__Fungi	p__Ascomycota	c__Dothideomycetes	o__Pleosporales	f__Phaeosphaeriaceae	g__Pseudoophiobolus	s__Pseudoophiobolus_mathieui
OTU0664	SINGLETON | n=1	0	0	1	0	0	UDB07499237	SH1012135.10FU	2.79331e-063	244.741	270	1	145	317	461	141	141	97.2	100	145	k__Fungi	p__Ascomycota	c__Leotiomycetes	o__Helotiales	f__Pezizellaceae	g__Xenopolyscytalum	s__Xenopolyscytalum_sp
OTU0665	SINGLETON | n=1	0	0	0	1	0	AF517904	SH0738300.10FU	2.14813e-071	271.792	300	1	153	337	489	152	152	99.3	100	153	k__Fungi	p__Ascomycota	c__Eurotiomycetes	o__Verrucariales	f__Verrucariales_fam_Incertae_sedis	g__Botryolepraria	s__Botryolepraria_lesdainii
OTU0666	SINGLETON | n=1	0	0	0	0	1	UDB03385855	SH0904518.10FU	9.36387e-090	333.106	368	1	184	357	540	184	184	100	100	184	k__Fungi	p__Ascomycota	c__Eurotiomycetes	o__Chaetothyriales	f__Herpotrichiellaceae	g__Herpotrichiellaceae_gen_Incertae_sedis	s__Herpotrichiellaceae_sp
OTU0667	SINGLETON | n=1	0	1	0	0	0	UDB02314272	SH1012259.10FU	1.04097e-068	262.775	290	1	145	317	461	145	145	100	100	145	k__Fungi	p__Ascomycota	c__Leotiomycetes	o__Helotiales	f__Pezizellaceae	g__Ciliolarina	s__Ciliolarina_sp
OTU0668	SINGLETON | n=1	0	0	1	0	0	UDB03608770	SH1012176.10FU	2.79331e-063	244.741	270	1	140	317	456	138	138	98.6	96.6	145	k__Fungi	p__Ascomycota	c__Leotiomycetes	o__Helotiales	f__Helotiales_fam_Incertae_sedis	g__Infundichalara	s__Infundichalara_sp
OTU0669	SINGLETON | n=1	0	0	0	1	0	KC514893	SH1012135.10FU	4.42631e-067	257.365	284	1	145	308	452	144	144	99.3	100	145	k__Fungi	p__Ascomycota	c__Leotiomycetes	o__Helotiales	f__Helotiales_fam_Incertae_sedis	g__Helotiales_gen_Incertae_sedis	s__Helotiales_sp
OTU0670	SINGLETON | n=1	0	1	0	0	0	OQ600167	SH0897344.10FU	2.29289e-064	248.348	274	1	137	335	471	137	137	100	94.5	145	k__Fungi	p__Ascomycota	c__Leotiomycetes	o__Thelebolales	f__Pseudeurotiaceae	g__Beskidomyces	s__Beskidomyces_laricis
OTU0671	SINGLETON | n=1	1	0	0	0	0	OK584507	SH1012176.10FU	2.79331e-063	244.741	270	1	145	381	525	141	141	97.2	100	145	k__Fungi	p__Ascomycota	c__Leotiomycetes	o__Helotiales	f__Helotiales_fam_Incertae_sedis	g__Infundichalara	s__Infundichalara_sp
OTU0672	SINGLETON | n=1	0	0	0	0	1	UDB02979360	SH0950390.10FU	1.18774e-061	239.331	264	1	145	334	478	140	140	96.6	100	145	k__Fungi	p__Ascomycota	c__Leotiomycetes	o__Thelebolales	f__Pseudeurotiaceae	g__Geomyces	s__Geomyces_sp
OTU0673	SINGLETON | n=1	0	0	0	0	1	UDB01991961	SH0904620.10FU	2.07213e-085	318.679	352	1	186	352	536	183	183	98.4	100	186	k__Fungi	p__Ascomycota	c__Eurotiomycetes	o__Chaetothyriales	f__Herpotrichiellaceae	g__Exophiala	s__Exophiala_sp
OTU0674	SINGLETON | n=1	0	1	0	0	0	UDB07537072	SH0965020.10FU	3.28353e-089	331.303	366	1	186	371	556	185	185	99.5	100	186	k__Fungi	p__Basidiomycota	c__Agaricomycetes	o__Hymenochaetales	f__Schizoporaceae	g__Xylodon	s__Xylodon_sp
OTU0675	SINGLETON | n=1	1	0	0	0	0	OK584507	SH1012176.10FU	2.79331e-063	244.741	270	1	145	381	525	141	141	97.2	100	145	k__Fungi	p__Ascomycota	c__Leotiomycetes	o__Helotiales	f__Helotiales_fam_Incertae_sedis	g__Infundichalara	s__Infundichalara_sp
OTU0676	SINGLETON | n=1	1	0	0	0	0	UDB02024784	SH0763677.10FU	3.40294e-062	241.134	266	1	136	322	457	135	135	99.3	93.8	145	k__Fungi	p__Ascomycota	c__Dothideomycetes	o__Mycosphaerellales	f__Neodevriesiaceae	g__Neodevriesia	s__Neodevriesia_sp
OTU0677	SINGLETON | n=1	0	0	1	0	0	LC646009	SH0924986.10FU	2.2001e-071	271.792	300	1	155	322	476	153	153	98.7	99.4	156	k__Fungi	p__Ascomycota	c__Dothideomycetes	o__Mytilinidiales	f__Mytilinidiaceae	g__Lophium	s__Lophium_arboricola
OTU0678	SINGLETON | n=1	1	0	0	0	0	OK584507	SH1012176.10FU	2.79331e-063	244.741	270	1	145	381	525	141	141	97.2	100	145	k__Fungi	p__Ascomycota	c__Leotiomycetes	o__Helotiales	f__Helotiales_fam_Incertae_sedis	g__Infundichalara	s__Infundichalara_sp
OTU0679	SINGLETON | n=1	1	0	0	0	0	UDB05110292	SH1015336.10FU	3.15969e-056	221.297	244	1	144	311	453	136	136	94.4	100	144	k__Fungi	p__Ascomycota	c__Dothideomycetes	o__Mycosphaerellales	f__Teratosphaeriaceae	g__Devriesia	s__Devriesia_sp
OTU0680	SINGLETON | n=1	0	0	1	0	0	AY843099	SH0843083.10FU	2.27312e-064	248.348	274	1	142	313	454	140	140	98.6	98.6	144	k__Fungi	p__Ascomycota	c__Dothideomycetes	o__Capnodiales	f__Capnodiales_fam_Incertae_sedis	g__Capnodiales_gen_Incertae_sedis	s__Capnodiales_sp
OTU0681	SINGLETON | n=1	1	0	0	0	0	MK336477	SH0958718.10FU	5.63159e-080	300.646	332	1	188	720	909	182	182	96.8	100	188	k__Fungi	p__Basidiomycota	c__Agaricostilbomycetes	o__Agaricostilbales	f__Agaricostilbales_fam_Incertae_sedis	g__Agaricostilbales_gen_Incertae_sedis	s__Agaricostilbales_sp
OTU0682	SINGLETON | n=1	0	0	1	0	0	UDB05114722	SH0950072.10FU	1.53162e-066	255.561	282	1	144	310	453	143	143	99.3	100	144	k__Fungi	p__Ascomycota	c__Dothideomycetes	o__Mycosphaerellales	f__Teratosphaeriaceae	g__Devriesia	s__Devriesia_sp
OTU0683	SINGLETON | n=1	0	0	0	0	1	UDB05110959	SH0983506.10FU	3.60202e-068	260.971	288	1	144	309	452	144	144	100	100	144	k__Fungi	p__Ascomycota	c__Dothideomycetes	o__Mycosphaerellales	f__Teratosphaeriaceae	g__Devriesia	s__Devriesia_sp
OTU0684	SINGLETON | n=1	1	0	0	0	0	UDB03608770	SH1012176.10FU	3.37361e-062	241.134	266	1	143	317	459	139	139	97.2	99.3	144	k__Fungi	p__Ascomycota	c__Leotiomycetes	o__Helotiales	f__Helotiales_fam_Incertae_sedis	g__Infundichalara	s__Infundichalara_sp
OTU0685	SINGLETON | n=1	0	0	1	0	0	MH861711	SH0901488.10FU	8.28376e-071	269.988	298	1	161	897	1056	157	157	97.5	97	166	k__Fungi	p__Ascomycota	c__Eurotiomycetes	o__Eurotiales	f__Trichocomaceae	g__Talaromyces	s__Talaromyces_rademirici
OTU0686	SINGLETON | n=1	0	0	0	0	1	UDB07649341	SH0924119.10FU	9.58838e-090	333.106	368	1	189	352	540	187	187	98.9	100	189	k__Fungi	p__Basidiomycota	c__Agaricomycetes	o__Trechisporales	f__Hydnodontaceae	g__Subulicystidium	s__Subulicystidium_sp
OTU0687	SINGLETON | n=1	0	0	1	0	0	UDB07674985	SH1012176.10FU	4.1099e-061	237.528	262	1	144	315	458	139	139	96.5	100	144	k__Fungi	p__Ascomycota	c__Leotiomycetes	o__Helotiales	f__Pezizellaceae	g__Ciliolarina	s__Ciliolarina_sp
OTU0688	SINGLETON | n=1	0	0	1	0	0	UDB07674985	SH1012176.10FU	4.1099e-061	237.528	262	1	144	315	458	139	139	96.5	100	144	k__Fungi	p__Ascomycota	c__Leotiomycetes	o__Helotiales	f__Pezizellaceae	g__Ciliolarina	s__Ciliolarina_sp
OTU0689	SINGLETON | n=1	0	0	1	0	0	LC272919	SH0915560.10FU	2.62891e-064	248.348	274	1	162	362	525	155	155	95.7	100	162	k__Fungi	p__Ascomycota	c__Dothideomycetes	o__Myriangiales	f__Myriangiales_fam_Incertae_sedis	g__Myriangiales_gen_Incertae_sedis	s__Myriangiales_sp
OTU0690	SINGLETON | n=1	0	0	1	0	0	UDB03610486	SH1012176.10FU	7.93397e-064	246.544	272	1	144	317	460	141	141	97.9	100	144	k__Fungi	p__Ascomycota	c__Leotiomycetes	o__Helotiales	f__Helotiales_fam_Incertae_sedis	g__Infundichalara	s__Infundichalara_sp
OTU0691	SINGLETON | n=1	0	0	1	0	0	UDB07674985	SH1012176.10FU	9.66555e-063	242.938	268	1	144	315	458	140	140	97.2	100	144	k__Fungi	p__Ascomycota	c__Leotiomycetes	o__Helotiales	f__Pezizellaceae	g__Ciliolarina	s__Ciliolarina_sp
OTU0692	SINGLETON | n=1	0	0	1	0	0	UDB03608770	SH1012176.10FU	4.1099e-061	237.528	262	1	144	317	460	139	139	96.5	100	144	k__Fungi	p__Ascomycota	c__Leotiomycetes	o__Helotiales	f__Helotiales_fam_Incertae_sedis	g__Infundichalara	s__Infundichalara_sp
OTU0693	SINGLETON | n=1	0	0	1	0	0	UDB07674985	SH1012176.10FU	2.12898e-058	228.511	252	1	144	315	458	137	137	95.1	100	144	k__Fungi	p__Ascomycota	c__Leotiomycetes	o__Helotiales	f__Pezizellaceae	g__Ciliolarina	s__Ciliolarina_sp
OTU0694	SINGLETON | n=1	0	0	0	0	1	UDB03444739	SH0897357.10FU	1.53162e-066	255.561	282	1	144	315	458	143	143	99.3	100	144	k__Fungi	p__Ascomycota	c__Leotiomycetes	o__Helotiales	f__Hyaloscyphaceae	g__Hyaloscypha	s__Hyaloscypha_sp
OTU0695	SINGLETON | n=1	0	0	0	1	0	OR781438	SH0856227.10FU	2.0345e-078	295.235	326	1	163	309	471	163	163	100	100	163	k__Fungi	p__Basidiomycota	c__Tremellomycetes	o__Trichosporonales	f__Trichosporonaceae	g__Apiotrichum	s__Apiotrichum_porosum
OTU0696	SINGLETON | n=1	0	0	1	0	0	OR036383	SH0945270.10FU	1.53162e-066	255.561	282	1	144	314	457	143	143	99.3	100	144	k__Fungi	p__Ascomycota	c__Leotiomycetes	o__Leotiales	f__Tympanidaceae	g__Pragmopora	s__Pragmopora_sp
OTU0697	SINGLETON | n=1	0	1	0	0	0	UDB03608770	SH1012176.10FU	2.59363e-057	224.904	248	1	144	317	460	136	136	94.4	100	144	k__Fungi	p__Ascomycota	c__Leotiomycetes	o__Helotiales	f__Helotiales_fam_Incertae_sedis	g__Infundichalara	s__Infundichalara_sp
OTU0698	SINGLETON | n=1	0	0	1	0	0	MK782435	SH0905449.10FU	2.35601e-071	271.792	300	1	165	771	935	159	159	96.4	100	165	k__Fungi	p__Ascomycota	c__Leotiomycetes	o__Helotiales	f__Mollisiaceae	g__Phialocephala	s__Phialocephala_fluminis
OTU0699	SINGLETON | n=1	0	0	1	0	0	UDB07674985	SH1012176.10FU	1.10284e-055	219.494	242	1	144	315	458	135	135	93.8	100	144	k__Fungi	p__Ascomycota	c__Leotiomycetes	o__Helotiales	f__Pezizellaceae	g__Ciliolarina	s__Ciliolarina_sp
OTU0700	SINGLETON | n=1	0	0	0	1	0	OQ831989	SH0927029.10FU	1.69495e-079	298.842	330	1	165	479	643	165	165	100	100	165	k__Fungi	p__Ascomycota	c__Sordariomycetes	o__Xylariales	f__Xylariaceae	g__Nemania	s__Nemania_serpens
OTU0701	SINGLETON | n=1	0	1	0	0	0	AY559372	SH0842946.10FU	5.29938e-066	253.758	280	1	143	314	456	142	142	99.3	100	143	k__Fungi	p__Ascomycota	c__Dothideomycetes	o__Mycosphaerellales	f__Extremaceae	g__Petrophila	s__Petrophila_incerta
OTU0702	SINGLETON | n=1	0	0	1	0	0	UDB03126426	SH0966817.10FU	1.1683e-042	176.213	194	1	143	327	469	127	127	88.8	100	143	k__Fungi	p__Ascomycota	c__Leotiomycetes	o__Leotiales	f__Tympanidaceae	g__Claussenomyces	s__Claussenomyces_sp
OTU0703	SINGLETON | n=1	1	0	0	0	0	UDB03609281	SH1012176.10FU	9.5815e-063	242.938	268	1	143	317	460	141	141	98.6	100	143	k__Fungi	p__Ascomycota	c__Leotiomycetes	o__Helotiales	f__Helotiales_fam_Incertae_sedis	g__Infundichalara	s__Infundichalara_sp
OTU0704	SINGLETON | n=1	1	0	0	0	0	OR091312	SH0974820.10FU	2.78413e-071	271.792	300	1	191	369	559	179	179	93.7	100	191	k__Fungi	p__Ascomycota	c__Eurotiomycetes	o__Chaetothyriales	f__Herpotrichiellaceae	g__Capronia	s__Capronia_sp
OTU0705	SINGLETON | n=1	1	0	0	0	0	UDB05110292	SH1015336.10FU	3.34427e-062	241.134	266	1	143	311	453	139	139	97.2	100	143	k__Fungi	p__Ascomycota	c__Dothideomycetes	o__Mycosphaerellales	f__Teratosphaeriaceae	g__Devriesia	s__Devriesia_sp
OTU0706	SINGLETON | n=1	0	1	0	0	0	MW842907	SH0972129.10FU	5.25289e-066	253.758	280	1	140	308	447	140	140	100	98.6	142	k__Fungi	p__Fungi_phy_Incertae_sedis	c__Fungi_cls_Incertae_sedis	o__Fungi_ord_Incertae_sedis	f__Fungi_fam_Incertae_sedis	g__Fungi_gen_Incertae_sedis	s__Fungi_sp
OTU0707	SINGLETON | n=1	0	0	1	0	0	UDB05051204	SH0887078.10FU	2.13855e-085	318.679	352	1	191	358	550	187	187	97.9	100	191	k__Fungi	p__Ascomycota	c__Saccharomycetes	o__Saccharomycetales	f__Debaryomycetaceae	g__Debaryomyces	s__Debaryomyces_sp
OTU0708	SINGLETON | n=1	0	0	1	0	0	LC015666	SH0960444.10FU	7.80287e-045	183.427	202	2	142	341	483	127	127	90.1	99.3	142	k__Fungi	p__Ascomycota	c__Lecanoromycetes	o__Lecanoromycetes_ord_Incertae_sedis	f__Lecanoromycetes_fam_Incertae_sedis	g__Lecanoromycetes_gen_Incertae_sedis	s__Lecanoromycetes_sp
OTU0709	SINGLETON | n=1	1	0	0	0	0	KP791764	SH1015359.10FU	3.78234e-055	217.691	240	3	142	338	477	132	132	94.3	98.6	142	k__Fungi	p__Ascomycota	c__Dothideomycetes	o__Mycosphaerellales	f__Extremaceae	g__Saxophila	s__Saxophila_tyrrhenica
OTU0710	SINGLETON | n=1	0	0	0	1	0	UDB01757406	SH0927183.10FU	4.31184e-067	257.365	284	1	142	306	447	142	142	100	100	142	k__Fungi	p__Ascomycota	c__Sordariomycetes	o__Chaetosphaeriales	f__Chaetosphaeriaceae	g__Chaetosphaeria	s__Chaetosphaeria_sp
OTU0711	SINGLETON | n=1	0	0	0	0	1	OK584559	SH0946157.10FU	1.49166e-066	255.561	282	1	141	384	524	141	141	100	100	141	k__Fungi	p__Ascomycota	c__Leotiomycetes	o__Helotiales	f__Myxotrichaceae	g__Oidiodendron	s__Oidiodendron_sp
OTU0712	SINGLETON | n=1	0	0	0	0	1	DQ069056	SH0866871.10FU	5.19405e-048	194.247	214	1	149	347	493	136	136	91.3	90.3	165	k__Fungi	p__Ascomycota	c__Eurotiomycetes	o__Chaetothyriales	f__Chaetothyriales_fam_Incertae_sedis	g__Chaetothyriales_gen_Incertae_sedis	s__Chaetothyriales_sp
OTU0713	SINGLETON | n=1	0	1	0	0	0	AY559329	SH1015359.10FU	3.51115e-049	197.854	218	1	139	322	459	128	128	92.1	98.6	141	k__Fungi	p__Ascomycota	c__Dothideomycetes	o__Mycosphaerellales	f__Extremaceae	g__Saxophila	s__Saxophila_sp
OTU0714	SINGLETON | n=1	0	0	0	0	1	MZ375775	SH0940202.10FU	8.78005e-077	289.825	320	1	165	335	499	163	163	98.8	100	165	k__Fungi	p__Ascomycota	c__Eurotiomycetes	o__Eurotiales	f__Aspergillaceae	g__Penicillium	s__Penicillium_pancosmium
OTU0715	SINGLETON | n=1	0	0	1	0	0	EU030275	SH0828639.10FU	7.10739e-059	230.314	254	19	163	352	496	138	138	95.2	89	163	k__Fungi	p__Ascomycota	c__Eurotiomycetes	o__Chaetothyriales	f__Herpotrichiellaceae	g__Sorocybe	s__Sorocybe_resinae
OTU0716	SINGLETON | n=1	1	0	0	0	0	LC646545	SH0946018.10FU	5.88747e-059	230.314	254	1	140	344	483	135	135	96.4	100	140	k__Fungi	p__Ascomycota	c__Leotiomycetes	o__Helotiales	f__Amorphothecaceae	g__Amorphotheca	s__Amorphotheca_resinae
OTU0717	SINGLETON | n=1	1	0	0	0	0	LC639279	SH0946103.10FU	5.88747e-059	230.314	254	1	140	370	509	135	135	96.4	100	140	k__Fungi	p__Ascomycota	c__Leotiomycetes	o__Helotiales	f__Myxotrichaceae	g__Oidiodendron	s__Oidiodendron_griseum
OTU0718	SINGLETON | n=1	1	0	0	0	0	EU030275	SH0828639.10FU	6.22909e-066	253.758	280	1	163	334	496	154	154	94.5	100	163	k__Fungi	p__Ascomycota	c__Eurotiomycetes	o__Chaetothyriales	f__Herpotrichiellaceae	g__Sorocybe	s__Sorocybe_resinae
OTU0719	SINGLETON | n=1	0	0	1	0	0	UDB02746397	SH0960482.10FU	1.13655e-061	239.331	264	1	140	301	440	137	137	97.9	100	140	k__Fungi	p__Ascomycota	c__Lecanoromycetes	o__Lecanoromycetes_ord_Incertae_sedis	f__Lecanoromycetes_fam_Incertae_sedis	g__Lecanoromycetes_gen_Incertae_sedis	s__Lecanoromycetes_sp
OTU0720	SINGLETON | n=1	0	0	1	0	0	KJ706436	SH0887078.10FU	1.77723e-086	322.286	356	1	193	399	591	187	187	96.9	100	193	k__Fungi	p__Ascomycota	c__Saccharomycetes	o__Saccharomycetales	f__Debaryomycetaceae	g__Debaryomyces	s__Debaryomyces_hansenii
OTU0721	SINGLETON | n=1	0	0	1	0	0	LC639279	SH0946103.10FU	7.1724e-058	226.707	250	1	140	370	509	134	134	95.7	100	140	k__Fungi	p__Ascomycota	c__Leotiomycetes	o__Helotiales	f__Myxotrichaceae	g__Oidiodendron	s__Oidiodendron_griseum
OTU0722	SINGLETON | n=1	1	0	0	0	0
OTU0723	SINGLETON | n=1	0	1	0	0	0	EU030275	SH0828639.10FU	6.22909e-066	253.758	280	1	163	334	496	154	154	94.5	100	163	k__Fungi	p__Ascomycota	c__Eurotiomycetes	o__Chaetothyriales	f__Herpotrichiellaceae	g__Sorocybe	s__Sorocybe_resinae
OTU0724	SINGLETON | n=1	1	0	0	0	0
OTU0725	SINGLETON | n=1	0	0	1	0	0	MW433664	SH0856208.10FU	2.31784e-006	55.3874	60	4	70	279	352	58	58	86.6	53.6	125	k__Fungi	p__Basidiomycota	c__Tremellomycetes	o__Trichosporonales	f__Trichosporonaceae	g__Apiotrichum	s__Apiotrichum_brassicae
OTU0726	SINGLETON | n=1	0	0	0	0	1	UDB0112484	SH0931394.10FU	5.87245e-079	297.039	328	1	164	390	553	164	164	100	100	164	k__Fungi	p__Ascomycota	c__Eurotiomycetes	o__Onygenales	f__Onygenales_fam_Incertae_sedis	g__Onygenales_gen_Incertae_sedis	s__Onygenales_sp
OTU0727	SINGLETON | n=1	1	0	0	0	0	UDB01377483	SH1043674.10FU	8.5501e-018	93.2581	102	4	99	265	367	85	85	88.5	81.4	118	k__Fungi	p__Ascomycota	c__Ascomycota_cls_Incertae_sedis	o__Ascomycota_ord_Incertae_sedis	f__Ascomycota_fam_Incertae_sedis	g__Ascomycota_gen_Incertae_sedis	s__Ascomycota_sp
OTU0728	SINGLETON | n=1	0	0	0	1	0	UDB01377483	SH1043674.10FU	5.3957e-014	80.6345	88	35	89	301	356	52	52	94.5	46.6	118	k__Fungi	p__Ascomycota	c__Ascomycota_cls_Incertae_sedis	o__Ascomycota_ord_Incertae_sedis	f__Ascomycota_fam_Incertae_sedis	g__Ascomycota_gen_Incertae_sedis	s__Ascomycota_sp
OTU0729	SINGLETON | n=1	0	1	0	0	0	UDB01377483	SH1043674.10FU	1.86212e-013	78.8312	86	4	88	265	356	75	75	88.2	72.6	117	k__Fungi	p__Ascomycota	c__Ascomycota_cls_Incertae_sedis	o__Ascomycota_ord_Incertae_sedis	f__Ascomycota_fam_Incertae_sedis	g__Ascomycota_gen_Incertae_sedis	s__Ascomycota_sp
OTU0730	SINGLETON | n=1	0	1	0	0	0	OR069551	SH0767731.10FU	2.32137e-071	271.792	300	1	163	331	493	158	158	96.9	100	163	k__Fungi	p__Ascomycota	c__Eurotiomycetes	o__Eurotiales	f__Aspergillaceae	g__Penicillium	s__Penicillium_corylophilum
OTU0731	SINGLETON | n=1	1	0	0	0	0	UDB01377483	SH1043674.10FU	1.9882e-019	98.6682	108	4	98	265	367	86	86	90.5	81.2	117	k__Fungi	p__Ascomycota	c__Ascomycota_cls_Incertae_sedis	o__Ascomycota_ord_Incertae_sedis	f__Ascomycota_fam_Incertae_sedis	g__Ascomycota_gen_Incertae_sedis	s__Ascomycota_sp
OTU0732	SINGLETON | n=1	0	1	0	0	0	UDB01377483	SH1043674.10FU	1.02991e-016	89.6514	98	4	98	265	367	85	85	89.5	81.2	117	k__Fungi	p__Ascomycota	c__Ascomycota_cls_Incertae_sedis	o__Ascomycota_ord_Incertae_sedis	f__Ascomycota_fam_Incertae_sedis	g__Ascomycota_gen_Incertae_sedis	s__Ascomycota_sp
OTU0733	SINGLETON | n=1	0	0	0	1	0	UDB04521142	SH0734441.10FU	9.9502e-090	333.106	368	1	195	316	511	192	192	98.5	100	195	k__Fungi	p__Basidiomycota	c__Agaricomycetes	o__Phallales	f__Phallaceae	g__Phallus	s__Phallus_sp
OTU0734	SINGLETON | n=1	0	0	0	1	0	OM104981	SH0965056.10FU	1.06239e-095	352.943	390	1	195	375	569	195	195	100	100	195	k__Fungi	p__Basidiomycota	c__Agaricomycetes	o__Hymenochaetales	f__Schizoporaceae	g__Lyomyces	s__Lyomyces_sambuci
OTU0735	SINGLETON | n=1	0	1	0	0	0	FJ235127	SH0892767.10FU	1.46779e-087	325.893	360	1	193	407	599	188	188	97.4	99.5	194	k__Fungi	p__Ascomycota	c__Saccharomycetes	o__Saccharomycetales	f__Saccharomycetales_fam_Incertae_sedis	g__Candida	s__Candida_keroseneae
OTU0736	SINGLETON | n=1	0	1	0	0	0	KT264384	SH0904651.10FU	1.67475e-080	302.449	334	1	194	387	578	185	185	95.4	100	194	k__Fungi	p__Ascomycota	c__Eurotiomycetes	o__Chaetothyriales	f__Herpotrichiellaceae	g__Exophiala	s__Exophiala_sp
OTU0737	SINGLETON | n=1	0	0	1	0	0	FJ235127	SH0892767.10FU	2.65383e-084	315.072	348	1	194	407	600	186	186	95.9	100	194	k__Fungi	p__Ascomycota	c__Saccharomycetes	o__Saccharomycetales	f__Saccharomycetales_fam_Incertae_sedis	g__Candida	s__Candida_keroseneae
OTU0738	SINGLETON | n=1	1	0	0	0	0	FJ235127	SH0892767.10FU	5.1231e-087	324.089	358	1	194	407	600	188	188	96.9	100	194	k__Fungi	p__Ascomycota	c__Saccharomycetes	o__Saccharomycetales	f__Saccharomycetales_fam_Incertae_sedis	g__Candida	s__Candida_keroseneae
OTU0739	SINGLETON | n=1	0	0	1	0	0	FJ235127	SH0892767.10FU	3.02802e-077	291.629	322	1	194	407	600	181	181	93.3	100	194	k__Fungi	p__Ascomycota	c__Saccharomycetes	o__Saccharomycetales	f__Saccharomycetales_fam_Incertae_sedis	g__Candida	s__Candida_keroseneae
OTU0740	SINGLETON | n=1	0	0	0	0	1	AY944882	SH0903180.10FU	8.23893e-034	147.359	162	31	178	449	584	123	123	83.1	75.5	196	k__Fungi	p__Mucoromycota	c__Mucoromycetes	o__Mucorales	f__Cunninghamellaceae	g__Absidia	s__Absidia_macrospora
OTU0741	SINGLETON | n=1	0	0	0	0	1	UDB01379845	SH0904438.10FU	2.53549e-040	169	186	1	173	353	519	141	141	81.5	87.8	197	k__Fungi	p__Ascomycota	c__Ascomycota_cls_Incertae_sedis	o__Ascomycota_ord_Incertae_sedis	f__Ascomycota_fam_Incertae_sedis	g__Ascomycota_gen_Incertae_sedis	s__Ascomycota_sp
OTU0742	SINGLETON | n=1	0	0	1	0	0
OTU0743	SINGLETON | n=1	0	0	1	0	0
OTU0744	SINGLETON | n=1	1	0	0	0	0	OP023249	SH0734755.10FU	2.29752e-091	338.516	374	1	192	412	603	190	190	99	100	192	k__Fungi	p__Basidiomycota	c__Agaricomycetes	o__Russulales	f__Peniophoraceae	g__Peniophora	s__Peniophora_sp
OTU0745	SINGLETON | n=1	0	0	1	0	0	UDB02165097	SH0859991.10FU	2.63074e-008	62.6008	68	1	137	268	404	104	104	75.9	71.4	192	k__Fungi	p__Fungi_phy_Incertae_sedis	c__Fungi_cls_Incertae_sedis	o__Fungi_ord_Incertae_sedis	f__Fungi_fam_Incertae_sedis	g__Fungi_gen_Incertae_sedis	s__Fungi_sp
OTU0746	SINGLETON | n=1	0	0	0	0	1	AJ567767	SH0964414.10FU	2.36843e-091	338.516	374	1	197	325	523	195	195	99	100	197	k__Fungi	p__Glomeromycota	c__Glomeromycetes	o__Glomerales	f__Glomeraceae	g__Rhizophagus	s__Rhizophagus_sp
OTU0747	SINGLETON | n=1	0	1	0	0	0	OQ734577	SH1006583.10FU	1.1828e-088	329.499	364	1	191	407	598	189	189	99	100	191	k__Fungi	p__Mucoromycota	c__Mucoromycetes	o__Mucorales	f__Syncephalastraceae	g__Syncephalastrum	s__Syncephalastrum_racemosum
OTU0748	SINGLETON | n=1	0	0	1	0	0	UDB02000288	SH0944003.10FU	4.58427e-037	158.179	174	1	132	346	479	117	117	88.6	67	197	k__Fungi	p__Ascomycota	c__Eurotiomycetes	o__Chaetothyriales	f__Herpotrichiellaceae	g__Exophiala	s__Exophiala_sp
OTU0749	SINGLETON | n=1	0	0	1	0	0	OP856539	SH0970687.10FU	9.05283e-046	187.033	206	1	173	361	535	148	148	85.5	91.1	190	k__Fungi	p__Ascomycota	c__Sordariomycetes	o__Microascales	f__Microascaceae	g__Scedosporium	s__Scedosporium_sp
OTU0750	SINGLETON | n=1	0	1	0	0	0	OP856539	SH0970687.10FU	3.37368e-051	205.067	226	1	173	361	535	152	152	87.9	91.1	190	k__Fungi	p__Ascomycota	c__Sordariomycetes	o__Microascales	f__Microascaceae	g__Scedosporium	s__Scedosporium_sp
OTU0751	SINGLETON | n=1	1	0	0	0	0	OQ102311	SH0762231.10FU	4.99814e-087	324.089	358	1	190	358	548	187	187	98.4	100	190	k__Fungi	p__Basidiomycota	c__Agaricomycetes	o__Polyporales	f__Polyporaceae	g__Trametes	s__Trametes_versicolor
OTU0752	SINGLETON | n=1	0	0	1	0	0	MW033339	SH0976409.10FU	1.86428e-073	279.005	308	1	184	358	541	172	172	93.5	96.8	190	k__Fungi	p__Ascomycota	c__Eurotiomycetes	o__Chaetothyriales	f__Herpotrichiellaceae	g__Capronia	s__Capronia_sp
OTU0753	SINGLETON | n=1	0	0	0	1	0	ON188811	SH0823492.10FU	1.85099e-092	342.123	378	1	189	330	518	189	189	100	100	189	k__Fungi	p__Basidiomycota	c__Agaricomycetes	o__Hymenochaetales	f__Schizoporaceae	g__Hyphodontia	s__Hyphodontia_alutaria
OTU0754	SINGLETON | n=1	0	1	0	0	0	OR069614	SH1024970.10FU	4.9669e-087	324.089	358	3	189	351	537	184	184	98.4	98.9	189	k__Fungi	p__Ascomycota	c__Dothideomycetes	o__Dothideales	f__Saccotheciaceae	g__Aureobasidium	s__Aureobasidium_sp
OTU0755	SINGLETON | n=1	0	0	1	0	0	OR091312	SH0974820.10FU	3.57641e-076	288.022	318	1	189	369	559	181	181	95.8	100	189	k__Fungi	p__Ascomycota	c__Eurotiomycetes	o__Chaetothyriales	f__Herpotrichiellaceae	g__Capronia	s__Capronia_sp
OTU0756	SINGLETON | n=1	0	0	0	0	1	OW983760	SH0879030.10FU	2.54392e-097	358.353	396	1	198	387	584	198	198	100	100	198	k__Fungi	p__Ascomycota	c__Eurotiomycetes	o__Chaetothyriales	f__Herpotrichiellaceae	g__Exophiala	s__Exophiala_castellanii
OTU0757	SINGLETON | n=1	0	0	0	1	0	UDB02007022	SH0904540.10FU	6.4606e-092	340.32	376	2	189	353	540	188	188	100	99.5	189	k__Fungi	p__Ascomycota	c__Eurotiomycetes	o__Chaetothyriales	f__Herpotrichiellaceae	g__Exophiala	s__Exophiala_sp
OTU0758	SINGLETON | n=1	0	0	0	0	1	UDB01991244	SH0904728.10FU	6.41997e-092	340.32	376	1	188	356	543	188	188	100	100	188	k__Fungi	p__Ascomycota	c__Eurotiomycetes	o__Chaetothyriales	f__Herpotrichiellaceae	g__Exophiala	s__Exophiala_sp
OTU0759	SINGLETON | n=1	0	0	0	1	0	KF483006	SH1024858.10FU	7.33184e-098	360.157	398	1	199	402	600	199	199	100	100	199	k__Fungi	p__Basidiomycota	c__Agaricomycetes	o__Polyporales	f__Phanerochaetaceae	g__Phanerochaete	s__Phanerochaete_martelliana
OTU0760	SINGLETON | n=1	0	0	0	1	0	UDB01968985	SH0904601.10FU	6.41997e-092	340.32	376	1	188	353	540	188	188	100	100	188	k__Fungi	p__Ascomycota	c__Eurotiomycetes	o__Chaetothyriales	f__Herpotrichiellaceae	g__Exophiala	s__Exophiala_sp
OTU0761	SINGLETON | n=1	1	0	0	0	0	OR613450	SH0822656.10FU	7.33184e-098	360.157	398	1	199	393	591	199	199	100	100	199	k__Fungi	p__Basidiomycota	c__Agaricomycetes	o__Agaricales	f__Pleurotaceae	g__Pleurotus	s__Pleurotus_ostreatus
OTU0762	SINGLETON | n=1	0	0	0	1	0	UDB05070496	SH0741957.10FU	7.33184e-098	360.157	398	1	199	395	593	199	199	100	100	199	k__Fungi	p__Basidiomycota	c__Agaricomycetes	o__Agaricales	f__Pluteaceae	g__Pluteus	s__Pluteus_sp
OTU0763	SINGLETON | n=1	0	0	1	0	0	UDB0748894	SH0750559.10FU	4.8548e-030	134.736	148	42	181	352	489	119	119	85	75.7	185	k__Fungi	p__Fungi_phy_Incertae_sedis	c__Fungi_cls_Incertae_sedis	o__Fungi_ord_Incertae_sedis	f__Fungi_fam_Incertae_sedis	g__Fungi_gen_Incertae_sedis	s__Fungi_sp
OTU0764	SINGLETON | n=1	0	0	0	0	1	OQ842744	SH0934583.10FU	2.67801e-090	334.91	370	1	185	239	423	185	185	100	100	185	k__Fungi	p__Ascomycota	c__Sordariomycetes	o__Microascales	f__Microascaceae	g__Cephalotrichum	s__Cephalotrichum_stemonitis
OTU0765	SINGLETON | n=1	0	0	0	1	0	UDB035348	SH0840887.10FU	2.06253e-085	318.679	352	1	184	396	579	181	181	98.4	100	184	k__Fungi	p__Ascomycota	c__Eurotiomycetes	o__Onygenales	f__Spiromastigaceae	g__Spiromastigoides	s__Spiromastigoides_gypsea
OTU0766	SINGLETON | n=1	1	0	0	0	0	NR_073266	SH0841248.10FU	1.09458e-095	352.943	390	1	200	341	540	198	198	99	100	200	k__Fungi	p__Basidiomycota	c__Agaricostilbomycetes	o__Agaricostilbales	f__Chionosphaeraceae	g__Kurtzmanomyces	s__Kurtzmanomyces_nectairei
OTU0767	SINGLETON | n=1	0	0	1	0	0	OQ717805	SH0755312.10FU	1.0722e-006	57.1907	62	4	96	367	460	73	73	78.5	50.5	184	k__Fungi	p__Ascomycota	c__Eurotiomycetes	o__Mycocaliciales	f__Mycocaliciaceae	g__Chaenothecopsis	s__Chaenothecopsis_orientalis
OTU0768	SINGLETON | n=1	0	0	0	0	1	OU989417	SH0989897.10FU	1.80925e-073	279.005	308	1	184	363	546	172	172	93.5	100	184	k__Fungi	p__Ascomycota	c__Sordariomycetes	o__Hypocreales	f__Niessliaceae	g__Niesslia	s__Niesslia_tenuis
OTU0769	SINGLETON | n=1	0	0	0	1	0	OR783299	SH0870027.10FU	3.24723e-089	331.303	366	1	183	362	544	183	183	100	100	183	k__Fungi	p__Ascomycota	c__Eurotiomycetes	o__Chaetothyriales	f__Cyphellophoraceae	g__Cyphellophora	s__Cyphellophora_olivacea
OTU0770	SINGLETON | n=1	1	0	0	0	0	OP315771	SH0871746.10FU	4.78802e-087	324.089	358	1	182	417	598	181	181	99.5	100	182	k__Fungi	p__Ascomycota	c__Sordariomycetes	o__Amphisphaeriales	f__Clypeophysalosporaceae	g__Neophysalospora	s__Neophysalospora_eucalypti
OTU0771	SINGLETON | n=1	0	0	1	0	0	OR885026	SH0747765.10FU	5.833e-086	320.483	354	1	182	415	596	180	180	98.9	100	182	k__Fungi	p__Mucoromycota	c__Mucoromycetes	o__Mucorales	f__Mucoraceae	g__Mucor	s__Mucor_pseudolusitanicus
OTU0772	SINGLETON | n=1	0	1	0	0	0	UDB07546702	SH0993541.10FU	1.3425e-075	286.219	316	1	201	309	514	190	190	94.5	100	201	k__Fungi	p__Basidiomycota	c__Microbotryomycetes	o__Sporidiobolales	f__Sporidiobolaceae	g__Sporidiobolaceae_gen_Incertae_sedis	s__Sporidiobolaceae_sp
OTU0773	SINGLETON | n=1	0	0	1	0	0	UDB07673531	SH1004753.10FU	3.90455e-088	327.696	362	1	181	404	584	181	181	100	100	181	k__Fungi	p__Basidiomycota	c__Agaricomycetes	o__Hymenochaetales	f__Schizoporaceae	g__Hyphodontia	s__Hyphodontia_subalutacea
OTU0774	SINGLETON | n=1	0	0	1	0	0	MW822599	SH0858492.10FU	2.58935e-097	358.353	396	1	201	399	599	200	200	99.5	100	201	k__Fungi	p__Basidiomycota	c__Agaricomycetes	o__Agaricales	f__Psathyrellaceae	g__Coprinopsis	s__Coprinopsis_pseudonivea
OTU0775	SINGLETON | n=1	1	0	0	0	0	OW988561	SH0958759.10FU	3.90455e-088	327.696	362	1	181	382	562	181	181	100	100	181	k__Fungi	p__Ascomycota	c__Saccharomycetes	o__Saccharomycetales	f__Phaffomycetaceae	g__Cyberlindnera	s__Cyberlindnera_mississippiensis
OTU0776	SINGLETON | n=1	0	0	0	1	0	MT458517	SH1024983.10FU	1.75489e-099	365.567	404	1	202	368	569	202	202	100	100	202	k__Fungi	p__Basidiomycota	c__Agaricomycetes	o__Polyporales	f__Phanerochaetaceae	g__Hyphodermella	s__Hyphodermella_corrugata
OTU0777	SINGLETON | n=1	1	0	0	0	0	MZ016618	SH0976976.10FU	1.25961e-081	306.056	338	1	179	360	537	176	176	98.3	100	179	k__Fungi	p__Fungi_phy_Incertae_sedis	c__Fungi_cls_Incertae_sedis	o__Fungi_ord_Incertae_sedis	f__Fungi_fam_Incertae_sedis	g__Fungi_gen_Incertae_sedis	s__Fungi_sp
OTU0778	SINGLETON | n=1	0	0	1	0	0	MZ016618	SH0976976.10FU	4.36716e-081	304.252	336	1	178	360	537	174	174	97.8	100	178	k__Fungi	p__Fungi_phy_Incertae_sedis	c__Fungi_cls_Incertae_sedis	o__Fungi_ord_Incertae_sedis	f__Fungi_fam_Incertae_sedis	g__Fungi_gen_Incertae_sedis	s__Fungi_sp
OTU0779	SINGLETON | n=1	0	0	0	1	0	OU953794	SH0976527.10FU	5.64238e-086	320.483	354	1	177	348	524	177	177	100	100	177	k__Fungi	p__Ascomycota	c__Eurotiomycetes	o__Chaetothyriales	f__Herpotrichiellaceae	g__Herpotrichiellaceae_gen_Incertae_sedis	s__Herpotrichiellaceae_sp
OTU0780	SINGLETON | n=1	0	0	0	1	0	FR682239	SH0870081.10FU	1.95608e-085	318.679	352	1	176	363	538	176	176	100	100	176	k__Fungi	p__Ascomycota	c__Eurotiomycetes	o__Chaetothyriales	f__Herpotrichiellaceae	g__Cladophialophora	s__Cladophialophora_sp
OTU0781	SINGLETON | n=1	0	0	0	1	0	OK146916	SH0946644.10FU	1.95608e-085	318.679	352	1	176	367	542	176	176	100	100	176	k__Fungi	p__Basidiomycota	c__Agaricomycetes	o__Agaricales	f__Inocybaceae	g__Inocybe	s__Inocybe_krieglsteineri
OTU0782	SINGLETON | n=1	0	0	0	0	1	MZ159768	SH0906149.10FU	1.01327e-082	309.662	342	1	176	396	571	174	174	98.9	100	176	k__Fungi	p__Ascomycota	c__Sordariomycetes	o__Hypocreales	f__Nectriaceae	g__Nectria	s__Nectria_pseudotrichia
OTU0783	SINGLETON | n=1	0	1	0	0	0	OQ346259	SH1003957.10FU	7.462e-098	360.157	398	1	202	435	636	201	201	99.5	100	202	k__Fungi	p__Basidiomycota	c__Agaricomycetes	o__Agaricales	f__Psathyrellaceae	g__Coprinellus	s__Coprinellus_radians
OTU0784	SINGLETON | n=1	0	0	0	0	1	OR793068	SH0845742.10FU	1.95608e-085	318.679	352	1	176	452	627	176	176	100	100	176	k__Fungi	p__Ascomycota	c__Eurotiomycetes	o__Onygenales	f__Onygenaceae	g__Chrysosporium	s__Chrysosporium_undulatum
OTU0785	SINGLETON | n=1	0	1	0	0	0	MZ016906	SH0976523.10FU	6.78093e-085	316.876	350	1	175	885	1059	175	175	100	100	175	k__Fungi	p__Fungi_phy_Incertae_sedis	c__Fungi_cls_Incertae_sedis	o__Fungi_ord_Incertae_sedis	f__Fungi_fam_Incertae_sedis	g__Fungi_gen_Incertae_sedis	s__Fungi_sp
OTU0786	SINGLETON | n=1	0	0	0	0	1	MH857651	SH0884033.10FU	1.3125e-030	136.539	150	1	133	395	529	115	115	86.5	76	175	k__Fungi	p__Ascomycota	c__Eurotiomycetes	o__Onygenales	f__Arthrodermataceae	g__Shanorella	s__Shanorella_spirotricha
OTU0787	SINGLETON | n=1	0	0	0	1	0	MK782177	SH0989877.10FU	1.80711e-079	298.842	330	1	174	347	521	172	172	98.9	100	174	k__Fungi	p__Ascomycota	c__Sordariomycetes	o__Hypocreales	f__Hypocreales_fam_Incertae_sedis	g__Hypocreales_gen_Incertae_sedis	s__Hypocreales_sp
OTU0788	SINGLETON | n=1	0	0	1	0	0	UDB04472691	SH0912325.10FU	3.46449e-082	307.859	340	1	173	274	446	172	172	99.4	100	173	k__Fungi	p__Basidiomycota	c__Tremellomycetes	o__Tremellales	f__Cuniculitremaceae	g__Cuniculitrema	s__Cuniculitrema_sp
OTU0789	SINGLETON | n=1	0	0	0	1	0	OQ150420	SH0906295.10FU	8.1477e-084	313.269	346	1	173	396	568	173	173	100	100	173	k__Fungi	p__Ascomycota	c__Sordariomycetes	o__Hypocreales	f__Hypocreaceae	g__Hypomyces	s__Hypomyces_sp
OTU0790	SINGLETON | n=1	0	1	0	0	0	OR387067	SH0974819.10FU	9.2044e-078	293.432	324	1	204	363	580	197	197	96.6	100	204	k__Fungi	p__Ascomycota	c__Eurotiomycetes	o__Chaetothyriales	f__Herpotrichiellaceae	g__Exophiala	s__Exophiala_dermatitidis
OTU0791	SINGLETON | n=1	0	0	0	0	1	KY607539	SH0940856.10FU	4.162e-081	304.252	336	1	171	491	661	170	170	99.4	100	171	k__Fungi	p__Ascomycota	c__Sordariomycetes	o__Hypocreales	f__Bionectriaceae	g__Peristomialis	s__Peristomialis_corynospora
OTU0792	SINGLETON | n=1	1	0	0	0	0	OM280146	SH0752344.10FU	5.07035e-080	300.646	332	1	171	347	517	169	169	98.8	100	171	k__Fungi	p__Ascomycota	c__Eurotiomycetes	o__Eurotiales	f__Thermoascaceae	g__Paecilomyces	s__Paecilomyces_divaricatus
OTU0793	SINGLETON | n=1	0	0	0	1	0	UDB0747535	SH1041206.10FU	3.66887e-051	205.067	226	1	189	309	507	167	167	88.4	92.6	204	k__Fungi	p__Fungi_phy_Incertae_sedis	c__Fungi_cls_Incertae_sedis	o__Fungi_ord_Incertae_sedis	f__Fungi_fam_Incertae_sedis	g__Fungi_gen_Incertae_sedis	s__Fungi_sp
OTU0794	SINGLETON | n=1	0	0	1	0	0	MZ573462	SH0735889.10FU	3.87063e-075	284.415	314	1	170	446	618	167	167	98.2	100	170	k__Fungi	p__Ascomycota	c__Dothideomycetes	o__Venturiales	f__Sympoventuriaceae	g__Ochroconis	s__Ochroconis_sp
OTU0795	SINGLETON | n=1	0	0	1	0	0	MT223780	SH0934675.10FU	5.83684e-093	343.926	380	1	205	338	542	199	199	97.1	100	205	k__Fungi	p__Basidiomycota	c__Exobasidiomycetes	o__Exobasidiales	f__Exobasidiaceae	g__Arcticomyces	s__Arcticomyces_warmingii
OTU0796	SINGLETON | n=1	0	0	0	0	1	UDB03397199	SH0848514.10FU	1.17564e-081	306.056	338	1	169	332	500	169	169	100	100	169	k__Fungi	p__Ascomycota	c__Sordariomycetes	o__Hypocreales	f__Ophiocordycipitaceae	g__Hirsutella	s__Hirsutella_sp
OTU0797	SINGLETON | n=1	0	0	0	1	0	UDB0632856	SH0940202.10FU	1.53054e-067	259.168	286	1	169	305	470	161	161	95.3	100	169	k__Fungi	p__Ascomycota	c__Eurotiomycetes	o__Eurotiales	f__Aspergillaceae	g__Penicillium	s__Penicillium_sp
OTU0798	SINGLETON | n=1	1	0	0	0	0	OR623243	SH0958738.10FU	1.24737e-068	262.775	290	1	168	289	451	160	160	95.2	100	168	k__Fungi	p__Ascomycota	c__Saccharomycetes	o__Saccharomycetales	f__Trichomonascaceae	g__Blastobotrys	s__Blastobotrys_sp
OTU0799	SINGLETON | n=1	0	0	0	0	1	UDB01355354	SH0997146.10FU	6.05179e-060	233.921	258	1	168	313	477	155	155	92.3	100	168	k__Fungi	p__Ascomycota	c__Ascomycota_cls_Incertae_sedis	o__Ascomycota_ord_Incertae_sedis	f__Ascomycota_fam_Incertae_sedis	g__Ascomycota_gen_Incertae_sedis	s__Ascomycota_sp
OTU0800	SINGLETON | n=1	0	0	0	0	1	UDB02240413	SH0931395.10FU	1.73234e-079	298.842	330	1	165	388	552	165	165	100	98.2	168	k__Fungi	p__Ascomycota	c__Eurotiomycetes	o__Onygenales	f__Onygenaceae	g__Chrysosporium	s__Chrysosporium_sp
OTU0801	SINGLETON | n=1	0	1	0	0	0	OW988092	SH0940189.10FU	1.33182e-074	282.612	312	1	166	372	539	164	164	98.8	98.8	168	k__Fungi	p__Ascomycota	c__Eurotiomycetes	o__Eurotiales	f__Aspergillaceae	g__Penicillium	s__Penicillium_sanguifluum
OTU0802	SINGLETON | n=1	0	1	0	0	0	MK782435	SH0905449.10FU	7.81512e-065	250.151	276	1	167	771	935	157	157	94	100	167	k__Fungi	p__Ascomycota	c__Leotiomycetes	o__Helotiales	f__Mollisiaceae	g__Phialocephala	s__Phialocephala_fluminis
OTU0803	SINGLETON | n=1	1	0	0	0	0	MK019050	SH1027467.10FU	1.41176e-080	302.449	334	1	167	163	329	167	167	100	100	167	k__Fungi	p__Ascomycota	c__Pezizomycetes	o__Pezizales	f__Pyronemataceae	g__Scutellinia	s__Scutellinia_sp
OTU0804	SINGLETON | n=1	0	0	0	1	0	LR983937	SH0862651.10FU	1.41176e-080	302.449	334	1	167	315	481	167	167	100	100	167	k__Fungi	p__Ascomycota	c__Eurotiomycetes	o__Eurotiales	f__Aspergillaceae	g__Penicillium	s__Penicillium_eremophilum
OTU0805	SINGLETON | n=1	0	0	0	0	1	MG920353	SH0988365.10FU	1.01654e-069	266.382	294	1	167	365	533	162	162	97	100	167	k__Fungi	p__Fungi_phy_Incertae_sedis	c__Fungi_cls_Incertae_sedis	o__Fungi_ord_Incertae_sedis	f__Fungi_fam_Incertae_sedis	g__Fungi_gen_Incertae_sedis	s__Fungi_sp
OTU0806	SINGLETON | n=1	0	0	0	0	1	KC253940	SH0990491.10FU	7.31309e-078	293.432	324	1	167	347	515	167	167	100	100	167	k__Fungi	p__Ascomycota	c__Sordariomycetes	o__Hypocreales	f__Bionectriaceae	g__Acremonium	s__Acremonium_charticola
OTU0807	SINGLETON | n=1	0	0	0	0	1	UDB03575251	SH0859804.10FU	1.41176e-080	302.449	334	1	167	286	452	167	167	100	100	167	k__Fungi	p__Ascomycota	c__Sordariomycetes	o__Hypocreales	f__Hypocreales_fam_Incertae_sedis	g__Hypocreales_gen_Incertae_sedis	s__Hypocreales_sp
OTU0808	SINGLETON | n=1	0	0	0	0	1	UDB04134032	SH0940189.10FU	2.39277e-052	208.674	230	1	167	330	498	148	148	88.6	100	167	k__Fungi	p__Ascomycota	c__Eurotiomycetes	o__Eurotiales	f__Aspergillaceae	g__Penicillium	s__Penicillium_sp
OTU0809	SINGLETON | n=1	1	0	0	0	0	UDB0747730	SH0844759.10FU	1.14167e-057	226.707	250	3	205	284	489	175	175	86.2	98.1	207	k__Fungi	p__Fungi_phy_Incertae_sedis	c__Fungi_cls_Incertae_sedis	o__Fungi_ord_Incertae_sedis	f__Fungi_fam_Incertae_sedis	g__Fungi_gen_Incertae_sedis	s__Fungi_sp
OTU0810	SINGLETON | n=1	0	0	0	0	1	OU989250	SH0848100.10FU	4.89182e-080	300.646	332	1	166	421	586	166	166	100	100	166	k__Fungi	p__Ascomycota	c__Eurotiomycetes	o__Onygenales	f__Gymnoascaceae	g__Gymnascella	s__Gymnascella_aurantiaca
OTU0811	SINGLETON | n=1	0	0	0	1	0	UDB04140662	SH0940202.10FU	2.08005e-078	295.235	326	1	166	333	498	165	165	99.4	100	166	k__Fungi	p__Ascomycota	c__Eurotiomycetes	o__Eurotiales	f__Aspergillaceae	g__Penicillium	s__Penicillium_sp
OTU0812	SINGLETON | n=1	1	0	0	0	0	MH101400	SH0940222.10FU	2.53402e-077	291.629	322	1	164	317	480	163	163	99.4	98.8	166	k__Fungi	p__Ascomycota	c__Eurotiomycetes	o__Eurotiales	f__Aspergillaceae	g__Penicillium	s__Penicillium_sanguifluum
OTU0813	SINGLETON | n=1	0	0	0	0	1	UDB03097884	SH0972419.10FU	7.7223e-098	360.157	398	1	208	353	558	206	206	99	100	208	k__Fungi	p__Basidiomycota	c__Agaricomycetes	o__Trechisporales	f__Hydnodontaceae	g__Litschauerella	s__Litschauerella_sp
OTU0814	SINGLETON | n=1	1	0	0	0	0	UDB01441599	SH0878054.10FU	4.58162e-074	280.808	310	1	166	343	509	163	163	98.2	100	166	k__Fungi	p__Ascomycota	c__Eurotiomycetes	o__Eurotiales	f__Aspergillaceae	g__Aspergillus	s__Aspergillus_sp
OTU0815	SINGLETON | n=1	0	0	1	0	0	UDB03955738	SH0939707.10FU	2.22284e-065	251.955	278	2	166	327	492	156	156	94.5	99.4	166	k__Fungi	p__Ascomycota	c__Eurotiomycetes	o__Eurotiales	f__Aspergillaceae	g__Penicillium	s__Penicillium_sp
OTU0816	SINGLETON | n=1	0	0	1	0	0	UDB0207502	SH0840832.10FU	3.77097e-070	268.185	296	1	209	323	530	190	190	90.9	100	209	k__Fungi	p__Basidiomycota	c__Microbotryomycetes	o__Sporidiobolales	f__Sporidiobolaceae	g__Rhodotorula	s__Rhodotorula_sp
OTU0817	SINGLETON | n=1	0	0	0	0	1	OR856081	SH0929249.10FU	7.2071e-078	293.432	324	1	165	325	489	164	164	99.4	100	165	k__Fungi	p__Ascomycota	c__Eurotiomycetes	o__Eurotiales	f__Aspergillaceae	g__Aspergillus	s__Aspergillus_rugulosus
OTU0818	SINGLETON | n=1	0	1	0	0	0	MK801333	SH0974827.10FU	5.2371e-081	304.252	336	1	209	415	634	201	201	96.2	100	209	k__Fungi	p__Ascomycota	c__Eurotiomycetes	o__Chaetothyriales	f__Chaetothyriales_fam_Incertae_sedis	g__Chaetothyriales_gen_Incertae_sedis	s__Chaetothyriales_sp
OTU0819	SINGLETON | n=1	0	0	0	0	1	UDB04693122	SH0990691.10FU	2.894e-103	378.19	418	1	209	333	541	209	209	100	100	209	k__Fungi	p__Basidiomycota	c__Agaricomycetes	o__Boletales	f__Sclerodermataceae	g__Pisolithus	s__Pisolithus_sp
OTU0820	SINGLETON | n=1	0	1	0	0	0	MK050379	SH0930458.10FU	5.99138e-017	91.4547	100	36	195	2089	2233	124	124	77.5	76.6	209	k__Fungi	p__Basidiomycota	c__Spiculogloeomycetes	o__Spiculogloeomycetes_ord_Incertae_sedis	f__Spiculogloeomycetes_fam_Incertae_sedis	g__Meniscomyces	s__Meniscomyces_layueensis
OTU0821	SINGLETON | n=1	0	1	0	0	0	KY102575	SH0733981.10FU	8.92589e-053	210.477	232	65	210	413	558	134	134	91.8	69.5	210	k__Fungi	p__Basidiomycota	c__Microbotryomycetes	o__Microbotryomycetes_ord_Incertae_sedis	f__Colacogloeaceae	g__Colacogloea	s__Colacogloea_philyla
OTU0822	SINGLETON | n=1	1	0	0	0	0	OR752067	SH0940075.10FU	1.93393e-072	275.398	304	1	165	364	528	160	160	97	100	165	k__Fungi	p__Ascomycota	c__Eurotiomycetes	o__Eurotiales	f__Aspergillaceae	g__Aspergillus	s__Aspergillus_fumigatus
OTU0823	SINGLETON | n=1	1	0	0	0	0	KY087605	SH0878054.10FU	7.70185e-065	250.151	276	1	165	224	390	156	156	94.5	100	165	k__Fungi	p__Ascomycota	c__Eurotiomycetes	o__Eurotiales	f__Aspergillaceae	g__Aspergillus	s__Aspergillus_domesticus
OTU0824	SINGLETON | n=1	0	0	0	1	0	OR852513	SH0853421.10FU	2.23733e-098	361.96	400	1	210	439	647	207	207	98.6	100	210	k__Fungi	p__Basidiomycota	c__Agaricomycetes	o__Polyporales	f__Podoscyphaceae	g__Abortiporus	s__Abortiporus_biennis
OTU0825	SINGLETON | n=1	1	0	0	0	0	HQ611323	SH0974823.10FU	2.56925e-072	275.398	304	1	167	402	568	161	161	96.4	79.1	211	k__Fungi	p__Ascomycota	c__Eurotiomycetes	o__Chaetothyriales	f__Herpotrichiellaceae	g__Exophiala	s__Exophiala_sp
OTU0826	SINGLETON | n=1	1	0	0	0	0	OR687493	SH1022674.10FU	2.40208e-104	381.797	422	1	211	302	512	211	211	100	100	211	k__Fungi	p__Basidiomycota	c__Microbotryomycetes	o__Leucosporidiales	f__Leucosporidiaceae	g__Leucosporidium	s__Leucosporidium_scottii
OTU0827	SINGLETON | n=1	0	0	0	0	1	OR019853	SH0990691.10FU	1.24431e-101	372.78	412	1	211	338	548	209	209	99.1	100	211	k__Fungi	p__Basidiomycota	c__Agaricomycetes	o__Boletales	f__Sclerodermataceae	g__Pisolithus	s__Pisolithus_microcarpus
OTU0828	SINGLETON | n=1	0	1	0	0	0	KY103886	SH0880181.10FU	2.12062e-073	279.005	308	1	212	368	581	194	194	91.5	100	212	k__Fungi	p__Basidiomycota	c__Agaricostilbomycetes	o__Agaricostilbales	f__Kondoaceae	g__Kondoa	s__Kondoa_phyllada
OTU0829	SINGLETON | n=1	0	1	0	0	0	AB520305	SH0844758.10FU	2.12062e-073	279.005	308	1	209	318	527	190	190	90.9	98.6	212	k__Fungi	p__Basidiomycota	c__Microbotryomycetes	o__Sporidiobolales	f__Sporidiobolaceae	g__Sporobolomyces	s__Sporobolomyces_sp
OTU0830	SINGLETON | n=1	0	0	0	1	0	AJ567773	SH0985582.10FU	1.52425e-100	369.174	408	1	212	315	526	209	209	98.6	100	212	k__Fungi	p__Glomeromycota	c__Glomeromycetes	o__Glomerales	f__Glomeraceae	g__Rhizophagus	s__Rhizophagus_sp
OTU0831	SINGLETON | n=1	1	0	0	0	0	PP115452	SH0911881.10FU	7.39515e-092	340.32	376	1	212	308	520	204	204	96.2	100	212	k__Fungi	p__Basidiomycota	c__Microbotryomycetes	o__Sporidiobolales	f__Sporidiobolaceae	g__Sporobolomyces	s__Sporobolomyces_salmonicolor
OTU0832	SINGLETON | n=1	1	0	0	0	0	PP115452	SH0911881.10FU	4.11262e-095	351.14	388	2	213	309	520	205	205	96.7	99.5	213	k__Fungi	p__Basidiomycota	c__Microbotryomycetes	o__Sporidiobolales	f__Sporidiobolaceae	g__Sporobolomyces	s__Sporobolomyces_salmonicolor
OTU0833	SINGLETON | n=1	0	0	0	0	1	OR965242	SH0940637.10FU	8.2233e-071	269.988	298	1	149	336	484	149	149	100	90.3	165	k__Fungi	p__Ascomycota	c__Eurotiomycetes	o__Eurotiales	f__Aspergillaceae	g__Penicillium	s__Penicillium_sp
OTU0834	SINGLETON | n=1	0	0	0	0	1	MN783072	SH0871003.10FU	7.2071e-078	293.432	324	1	165	388	552	164	164	99.4	100	165	k__Fungi	p__Ascomycota	c__Eurotiomycetes	o__Eurotiales	f__Aspergillaceae	g__Penicillium	s__Penicillium_ochrochloron
OTU0835	SINGLETON | n=1	0	0	0	1	0	OW984594	SH0991555.10FU	1.99354e-105	385.404	426	1	213	311	523	213	213	100	100	213	k__Fungi	p__Basidiomycota	c__Wallemiomycetes	o__Wallemiales	f__Wallemiaceae	g__Wallemia	s__Wallemia_muriae
OTU0836	SINGLETON | n=1	1	0	0	0	0	PP115452	SH0911881.10FU	1.17828e-095	352.943	390	1	213	308	520	206	206	96.7	100	213	k__Fungi	p__Basidiomycota	c__Microbotryomycetes	o__Sporidiobolales	f__Sporidiobolaceae	g__Sporobolomyces	s__Sporobolomyces_salmonicolor
OTU0837	SINGLETON | n=1	0	1	0	0	0	OQ913854	SH0940607.10FU	2.35601e-071	271.792	300	1	165	284	447	160	160	97	100	165	k__Fungi	p__Ascomycota	c__Eurotiomycetes	o__Eurotiales	f__Aspergillaceae	g__Penicillium	s__Penicillium_catalonicum
OTU0838	SINGLETON | n=1	0	0	0	0	1	OQ152598	SH0940075.10FU	1.69495e-079	298.842	330	1	165	371	535	165	165	100	100	165	k__Fungi	p__Ascomycota	c__Eurotiomycetes	o__Eurotiales	f__Aspergillaceae	g__Aspergillus	s__Aspergillus_felis
OTU0839	SINGLETON | n=1	1	0	0	0	0	UDB01788746	SH0870926.10FU	2.33869e-071	271.792	300	1	164	344	505	160	160	97.6	100	164	k__Fungi	p__Ascomycota	c__Eurotiomycetes	o__Chaetothyriales	f__Chaetothyriales_fam_Incertae_sedis	g__Chaetothyriales_gen_Incertae_sedis	s__Chaetothyriales_sp
OTU0840	SINGLETON | n=1	0	1	0	0	0	OM337573	SH0849718.10FU	4.22845e-068	260.971	288	1	164	538	700	157	157	95.7	100	164	k__Fungi	p__Ascomycota	c__Dothideomycetes	o__Mytilinidiales	f__Mytilinidiaceae	g__Mytilinidion	s__Mytilinidion_resinicola
OTU0841	SINGLETON | n=1	0	1	0	0	0	PP115452	SH0911881.10FU	2.13039e-092	342.123	378	1	212	308	519	203	203	95.8	99.5	213	k__Fungi	p__Basidiomycota	c__Microbotryomycetes	o__Sporidiobolales	f__Sporidiobolaceae	g__Sporobolomyces	s__Sporobolomyces_salmonicolor
OTU0842	SINGLETON | n=1	0	0	1	0	0	PP115452	SH0911881.10FU	1.17828e-095	352.943	390	1	213	308	520	206	206	96.7	100	213	k__Fungi	p__Basidiomycota	c__Microbotryomycetes	o__Sporidiobolales	f__Sporidiobolaceae	g__Sporobolomyces	s__Sporobolomyces_salmonicolor
OTU0843	SINGLETON | n=1	0	0	1	0	0	OQ694453	SH0899106.10FU	4.39882e-063	244.741	270	1	213	442	652	187	187	87.8	100	213	k__Fungi	p__Basidiomycota	c__Agaricostilbomycetes	o__Agaricostilbales	f__Chionosphaeraceae	g__Chionosphaera	s__Chionosphaera_cuniculicola
OTU0844	SINGLETON | n=1	0	0	1	0	0	PP115452	SH0911881.10FU	2.96128e-084	315.072	348	1	213	308	520	200	200	93.9	100	213	k__Fungi	p__Basidiomycota	c__Microbotryomycetes	o__Sporidiobolales	f__Sporidiobolaceae	g__Sporobolomyces	s__Sporobolomyces_salmonicolor
OTU0845	SINGLETON | n=1	0	0	0	1	0	UDB04491981	SH0865936.10FU	3.25083e-063	244.741	270	1	164	305	468	155	155	94.5	100	164	k__Fungi	p__Ascomycota	c__Sordariomycetes	o__Hypocreales	f__Nectriaceae	g__Cylindrocarpon	s__Cylindrocarpon_sp
OTU0846	SINGLETON | n=1	0	0	1	0	0	OR069551	SH0767731.10FU	8.16283e-071	269.988	298	1	162	331	492	157	157	96.9	98.8	164	k__Fungi	p__Ascomycota	c__Eurotiomycetes	o__Eurotiales	f__Aspergillaceae	g__Penicillium	s__Penicillium_corylophilum
OTU0847	SINGLETON | n=1	0	0	0	0	1	MW673659	SH0926415.10FU	5.74279e-106	387.207	428	1	214	425	638	214	214	100	100	214	k__Fungi	p__Basidiomycota	c__Agaricomycetes	o__Polyporales	f__Irpicaceae	g__Meruliopsis	s__Meruliopsis_faginea
OTU0848	SINGLETON | n=1	0	1	0	0	0	EU030275	SH0828639.10FU	6.22909e-066	253.758	280	1	163	334	496	154	154	94.5	100	163	k__Fungi	p__Ascomycota	c__Eurotiomycetes	o__Chaetothyriales	f__Herpotrichiellaceae	g__Sorocybe	s__Sorocybe_resinae
OTU0849	SINGLETON | n=1	0	1	0	0	0	UDB01887478	SH0958714.10FU	3.90426e-032	141.949	156	1	186	294	470	152	152	81.7	86.5	215	k__Fungi	p__Basidiomycota	c__Agaricostilbomycetes	o__Agaricostilbales	f__Chionosphaeraceae	g__Chionosphaeraceae_gen_Incertae_sedis	s__Chionosphaeraceae_sp
OTU0850	SINGLETON | n=1	0	1	0	0	0	OR069551	SH0767731.10FU	2.32137e-071	271.792	300	1	163	331	493	158	158	96.9	100	163	k__Fungi	p__Ascomycota	c__Eurotiomycetes	o__Eurotiales	f__Aspergillaceae	g__Penicillium	s__Penicillium_corylophilum
OTU0851	SINGLETON | n=1	0	1	0	0	0	OQ874393	SH0767731.10FU	7.58859e-065	250.151	276	1	163	292	454	153	153	93.9	100	163	k__Fungi	p__Ascomycota	c__Eurotiomycetes	o__Eurotiales	f__Aspergillaceae	g__Penicillium	s__Penicillium_sp
OTU0852	SINGLETON | n=1	1	0	0	0	0	KX766170	SH0907362.10FU	1.45113e-094	349.336	386	1	215	372	588	208	208	96.7	100	215	k__Fungi	p__Basidiomycota	c__Tritirachiomycetes	o__Tritirachiales	f__Tritirachiaceae	g__Paratritirachium	s__Paratritirachium_sp
OTU0853	SINGLETON | n=1	0	1	0	0	0	OR069551	SH0767731.10FU	2.32137e-071	271.792	300	1	163	331	493	158	158	96.9	100	163	k__Fungi	p__Ascomycota	c__Eurotiomycetes	o__Eurotiales	f__Aspergillaceae	g__Penicillium	s__Penicillium_corylophilum
OTU0854	SINGLETON | n=1	0	1	0	0	0	OR069551	SH0767731.10FU	2.32137e-071	271.792	300	1	163	331	493	158	158	96.9	100	163	k__Fungi	p__Ascomycota	c__Eurotiomycetes	o__Eurotiales	f__Aspergillaceae	g__Penicillium	s__Penicillium_corylophilum
OTU0855	SINGLETON | n=1	0	0	1	0	0	EU030275	SH0828639.10FU	1.46494e-067	259.168	286	1	163	334	496	155	155	95.1	100	163	k__Fungi	p__Ascomycota	c__Eurotiomycetes	o__Chaetothyriales	f__Herpotrichiellaceae	g__Sorocybe	s__Sorocybe_resinae
OTU0856	SINGLETON | n=1	0	0	1	0	0	EU030275	SH0828639.10FU	6.22909e-066	253.758	280	1	163	334	496	154	154	94.5	100	163	k__Fungi	p__Ascomycota	c__Eurotiomycetes	o__Chaetothyriales	f__Herpotrichiellaceae	g__Sorocybe	s__Sorocybe_resinae
OTU0857	SINGLETON | n=1	0	1	0	0	0	EU030275	SH0828639.10FU	7.58859e-065	250.151	276	1	163	334	496	153	153	93.9	100	163	k__Fungi	p__Ascomycota	c__Eurotiomycetes	o__Chaetothyriales	f__Herpotrichiellaceae	g__Sorocybe	s__Sorocybe_resinae
OTU0858	SINGLETON | n=1	0	0	0	0	1	AY236287	SH1008580.10FU	3.44963e-096	354.747	392	1	217	393	610	210	210	96.8	100	217	k__Fungi	p__Glomeromycota	c__Glomeromycetes	o__Entrophosporales	f__Entrophosporaceae	g__Claroideoglomus	s__Claroideoglomus_sp
OTU0859	SINGLETON | n=1	0	0	1	0	0	EU030275	SH0828639.10FU	6.22909e-066	253.758	280	1	163	334	496	154	154	94.5	100	163	k__Fungi	p__Ascomycota	c__Eurotiomycetes	o__Chaetothyriales	f__Herpotrichiellaceae	g__Sorocybe	s__Sorocybe_resinae
OTU0860	SINGLETON | n=1	1	0	0	0	0	OR387067	SH0974819.10FU	6.65935e-099	363.763	402	1	217	363	580	212	212	97.7	100	217	k__Fungi	p__Ascomycota	c__Eurotiomycetes	o__Chaetothyriales	f__Herpotrichiellaceae	g__Exophiala	s__Exophiala_dermatitidis
OTU0861	SINGLETON | n=1	0	1	0	0	0	EU030275	SH0828639.10FU	1.78467e-066	255.561	282	3	163	336	496	153	153	95	98.8	163	k__Fungi	p__Ascomycota	c__Eurotiomycetes	o__Chaetothyriales	f__Herpotrichiellaceae	g__Sorocybe	s__Sorocybe_resinae
OTU0862	SINGLETON | n=1	0	0	1	0	0	OR091314	SH0801460.10FU	3.44521e-069	264.578	292	1	163	347	507	157	157	96.3	100	163	k__Fungi	p__Ascomycota	c__Eurotiomycetes	o__Phaeomoniellales	f__Celotheliaceae	g__Phaeomoniella	s__Phaeomoniella_sp
OTU0863	SINGLETON | n=1	0	0	0	0	1	UDB06268935	SH0920822.10FU	3.95358e-108	394.421	436	1	218	361	578	218	218	100	100	218	k__Fungi	p__Basidiomycota	c__Agaricomycetes	o__Thelephorales	f__Thelephoraceae	g__Tomentella	s__Tomentella_sp
OTU0864	SINGLETON | n=1	1	0	0	0	0	OR387067	SH0974819.10FU	4.51103e-101	370.977	410	1	218	363	580	213	213	97.7	100	218	k__Fungi	p__Ascomycota	c__Eurotiomycetes	o__Chaetothyriales	f__Herpotrichiellaceae	g__Exophiala	s__Exophiala_dermatitidis
OTU0865	SINGLETON | n=1	0	0	0	0	1	UDB05736460	SH0919207.10FU	1.6811e-106	389.011	430	1	218	367	584	217	217	99.5	100	218	k__Fungi	p__Basidiomycota	c__Agaricomycetes	o__Thelephorales	f__Thelephoraceae	g__Tomentella	s__Tomentella_sp
OTU0866	SINGLETON | n=1	0	1	0	0	0	EU030275	SH0828639.10FU	1.2025e-068	262.775	290	1	163	334	496	156	156	95.7	100	163	k__Fungi	p__Ascomycota	c__Eurotiomycetes	o__Chaetothyriales	f__Herpotrichiellaceae	g__Sorocybe	s__Sorocybe_resinae
OTU0867	SINGLETON | n=1	0	0	1	0	0	OR387067	SH0974819.10FU	9.98906e-097	356.55	394	1	215	363	577	208	208	96.7	98.2	219	k__Fungi	p__Ascomycota	c__Eurotiomycetes	o__Chaetothyriales	f__Herpotrichiellaceae	g__Exophiala	s__Exophiala_dermatitidis
OTU0868	SINGLETON | n=1	0	0	1	0	0	OR387067	SH0974819.10FU	8.19952e-098	360.157	398	1	219	363	580	212	212	96.8	100	219	k__Fungi	p__Ascomycota	c__Eurotiomycetes	o__Chaetothyriales	f__Herpotrichiellaceae	g__Exophiala	s__Exophiala_dermatitidis
OTU0869	SINGLETON | n=1	0	0	1	0	0	OR387067	SH0974819.10FU	4.24746e-095	351.14	388	1	219	363	580	210	210	95.9	100	219	k__Fungi	p__Ascomycota	c__Eurotiomycetes	o__Chaetothyriales	f__Herpotrichiellaceae	g__Exophiala	s__Exophiala_dermatitidis
OTU0870	SINGLETON | n=1	0	0	1	0	0	OR069551	SH0767731.10FU	2.32137e-071	271.792	300	1	163	331	493	158	158	96.9	100	163	k__Fungi	p__Ascomycota	c__Eurotiomycetes	o__Eurotiales	f__Aspergillaceae	g__Penicillium	s__Penicillium_corylophilum
OTU0871	SINGLETON | n=1	0	1	0	0	0	OR387067	SH0974819.10FU	2.20024e-092	342.123	378	1	219	363	580	208	208	95	100	219	k__Fungi	p__Ascomycota	c__Eurotiomycetes	o__Chaetothyriales	f__Herpotrichiellaceae	g__Exophiala	s__Exophiala_dermatitidis
OTU0872	SINGLETON | n=1	0	1	0	0	0	OR387067	SH0974819.10FU	9.98906e-097	356.55	394	1	219	363	580	211	211	96.3	100	219	k__Fungi	p__Ascomycota	c__Eurotiomycetes	o__Chaetothyriales	f__Herpotrichiellaceae	g__Exophiala	s__Exophiala_dermatitidis
OTU0873	SINGLETON | n=1	0	1	0	0	0	OR387067	SH0974819.10FU	9.98906e-097	356.55	394	1	219	363	580	211	211	96.3	100	219	k__Fungi	p__Ascomycota	c__Eurotiomycetes	o__Chaetothyriales	f__Herpotrichiellaceae	g__Exophiala	s__Exophiala_dermatitidis
OTU0874	SINGLETON | n=1	1	0	0	0	0	EU030275	SH0828639.10FU	6.22909e-066	253.758	280	1	163	334	496	154	154	94.5	100	163	k__Fungi	p__Ascomycota	c__Eurotiomycetes	o__Chaetothyriales	f__Herpotrichiellaceae	g__Sorocybe	s__Sorocybe_resinae
OTU0875	SINGLETON | n=1	0	0	0	1	0	OL721948	SH0964528.10FU	5.45933e-073	277.202	306	1	163	310	471	160	160	98.2	100	163	k__Fungi	p__Ascomycota	c__Eurotiomycetes	o__Arachnomycetales	f__Arachnomycetaceae	g__Arachnomyces	s__Arachnomyces_sp
OTU0876	SINGLETON | n=1	0	1	0	0	0	OR387067	SH0974819.10FU	3.50497e-096	354.747	392	1	220	363	580	212	212	96.4	100	220	k__Fungi	p__Ascomycota	c__Eurotiomycetes	o__Chaetothyriales	f__Herpotrichiellaceae	g__Exophiala	s__Exophiala_dermatitidis
OTU0877	SINGLETON | n=1	0	0	0	0	1	FJ820632	SH0841145.10FU	9.4463e-110	399.831	442	1	221	212	432	221	221	100	100	221	k__Fungi	p__Basidiomycota	c__Agaricomycetes	o__Trechisporales	f__Hydnodontaceae	g__Trechispora	s__Trechispora_sp
OTU0878	SINGLETON | n=1	1	0	0	0	0	MN071391	SH1043354.10FU	1.608e-100	369.174	408	1	222	297	518	215	215	96.8	100	222	k__Fungi	p__Fungi_phy_Incertae_sedis	c__Fungi_cls_Incertae_sedis	o__Fungi_ord_Incertae_sedis	f__Fungi_fam_Incertae_sedis	g__Fungi_gen_Incertae_sedis	s__Fungi_sp
OTU0879	SINGLETON | n=1	0	0	1	0	0	MN071391	SH1043354.10FU	1.608e-100	369.174	408	1	222	297	518	215	215	96.8	100	222	k__Fungi	p__Fungi_phy_Incertae_sedis	c__Fungi_cls_Incertae_sedis	o__Fungi_ord_Incertae_sedis	f__Fungi_fam_Incertae_sedis	g__Fungi_gen_Incertae_sedis	s__Fungi_sp
OTU0880	SINGLETON | n=1	0	0	0	0	1	OR824920	SH0947840.10FU	2.72058e-110	401.634	444	1	222	423	644	222	222	100	100	222	k__Fungi	p__Basidiomycota	c__Agaricomycetes	o__Agaricales	f__Inocybaceae	g__Inocybe	s__Inocybe_calosporoides
OTU0881	SINGLETON | n=1	1	0	0	0	0	EU030275	SH0828639.10FU	6.22909e-066	253.758	280	1	163	334	496	154	154	94.5	100	163	k__Fungi	p__Ascomycota	c__Eurotiomycetes	o__Chaetothyriales	f__Herpotrichiellaceae	g__Sorocybe	s__Sorocybe_resinae
OTU0882	SINGLETON | n=1	0	0	1	0	0	MN071391	SH1043354.10FU	1.95895e-099	365.567	404	1	222	297	518	214	214	96.4	100	222	k__Fungi	p__Fungi_phy_Incertae_sedis	c__Fungi_cls_Incertae_sedis	o__Fungi_ord_Incertae_sedis	f__Fungi_fam_Incertae_sedis	g__Fungi_gen_Incertae_sedis	s__Fungi_sp
OTU0883	SINGLETON | n=1	0	0	1	0	0	MN071391	SH1043354.10FU	4.31869e-076	288.022	318	1	222	297	518	197	197	88.7	100	222	k__Fungi	p__Fungi_phy_Incertae_sedis	c__Fungi_cls_Incertae_sedis	o__Fungi_ord_Incertae_sedis	f__Fungi_fam_Incertae_sedis	g__Fungi_gen_Incertae_sedis	s__Fungi_sp
OTU0884	SINGLETON | n=1	0	0	1	0	0	MN071391	SH1043354.10FU	1.95895e-099	365.567	404	1	222	297	518	214	214	96.4	100	222	k__Fungi	p__Fungi_phy_Incertae_sedis	c__Fungi_cls_Incertae_sedis	o__Fungi_ord_Incertae_sedis	f__Fungi_fam_Incertae_sedis	g__Fungi_gen_Incertae_sedis	s__Fungi_sp
OTU0885	SINGLETON | n=1	0	0	0	0	1	UDB05110294	SH1005548.10FU	1.45401e-067	259.168	286	1	162	310	469	156	156	96.3	100	162	k__Fungi	p__Ascomycota	c__Dothideomycetes	o__Mycosphaerellales	f__Teratosphaeriaceae	g__Devriesia	s__Devriesia_sp
OTU0886	SINGLETON | n=1	0	1	0	0	0	MT813950	SH0950131.10FU	2.99959e-057	224.904	248	22	162	235	374	135	135	95.7	87	162	k__Fungi	p__Ascomycota	c__Xylonomycetes	o__Symbiotaphrinales	f__Symbiotaphrinaceae	g__Symbiotaphrina	s__Symbiotaphrina_microtheca
OTU0887	SINGLETON | n=1	0	0	1	0	0	MN862667	SH0868842.10FU	9.79704e-070	266.382	294	1	162	415	576	156	156	96.3	100	162	k__Fungi	p__Ascomycota	c__Ascomycota_cls_Incertae_sedis	o__Ascomycota_ord_Incertae_sedis	f__Ascomycota_fam_Incertae_sedis	g__Ascomycota_gen_Incertae_sedis	s__Ascomycota_sp
OTU0888	SINGLETON | n=1	0	0	1	0	0	MN071391	SH1043354.10FU	5.25659e-094	347.533	384	1	222	297	518	210	210	94.6	100	222	k__Fungi	p__Fungi_phy_Incertae_sedis	c__Fungi_cls_Incertae_sedis	o__Fungi_ord_Incertae_sedis	f__Fungi_fam_Incertae_sedis	g__Fungi_gen_Incertae_sedis	s__Fungi_sp
OTU0889	SINGLETON | n=1	1	0	0	0	0	MN071391	SH1043354.10FU	1.608e-100	369.174	408	1	222	297	518	215	215	96.8	100	222	k__Fungi	p__Fungi_phy_Incertae_sedis	c__Fungi_cls_Incertae_sedis	o__Fungi_ord_Incertae_sedis	f__Fungi_fam_Incertae_sedis	g__Fungi_gen_Incertae_sedis	s__Fungi_sp
OTU0890	SINGLETON | n=1	1	0	0	0	0	MN071391	SH1043354.10FU	4.31488e-095	351.14	388	1	222	297	518	211	211	95	100	222	k__Fungi	p__Fungi_phy_Incertae_sedis	c__Fungi_cls_Incertae_sedis	o__Fungi_ord_Incertae_sedis	f__Fungi_fam_Incertae_sedis	g__Fungi_gen_Incertae_sedis	s__Fungi_sp
OTU0891	SINGLETON | n=1	0	1	0	0	0	MN071391	SH1043354.10FU	1.95895e-099	365.567	404	3	222	299	518	213	213	96.8	99.1	222	k__Fungi	p__Fungi_phy_Incertae_sedis	c__Fungi_cls_Incertae_sedis	o__Fungi_ord_Incertae_sedis	f__Fungi_fam_Incertae_sedis	g__Fungi_gen_Incertae_sedis	s__Fungi_sp
OTU0892	SINGLETON | n=1	1	0	0	0	0	OR069551	SH0767731.10FU	1.45401e-067	259.168	286	1	162	331	493	156	156	96.3	100	162	k__Fungi	p__Ascomycota	c__Eurotiomycetes	o__Eurotiales	f__Aspergillaceae	g__Penicillium	s__Penicillium_corylophilum
OTU0893	SINGLETON | n=1	0	0	0	1	0	PP034017	SH0740116.10FU	7.04812e-078	293.432	324	1	162	232	393	162	162	100	100	162	k__Fungi	p__Ascomycota	c__Sordariomycetes	o__Hypocreales	f__Cordycipitaceae	g__Lecanicillium	s__Lecanicillium_psalliotae
OTU0894	SINGLETON | n=1	0	0	0	1	0	OQ257370	SH0740105.10FU	7.04812e-078	293.432	324	1	162	343	504	162	162	100	100	162	k__Fungi	p__Ascomycota	c__Sordariomycetes	o__Hypocreales	f__Cordycipitaceae	g__Gamszarea	s__Gamszarea_microspora
OTU0895	SINGLETON | n=1	0	0	0	1	0	UDB03914981	SH0939727.10FU	1.04603e-075	286.219	316	1	162	332	494	162	162	100	100	162	k__Fungi	p__Ascomycota	c__Eurotiomycetes	o__Eurotiales	f__Aspergillaceae	g__Penicillium	s__Penicillium_sp
OTU0896	SINGLETON | n=1	1	0	0	0	0	UDB01788742	SH0961637.10FU	7.04812e-078	293.432	324	1	162	351	512	162	162	100	100	162	k__Fungi	p__Ascomycota	c__Eurotiomycetes	o__Chaetothyriales	f__Chaetothyriales_fam_Incertae_sedis	g__Chaetothyriales_gen_Incertae_sedis	s__Chaetothyriales_sp
OTU0897	SINGLETON | n=1	1	0	0	0	0	UDB03955738	SH0939707.10FU	2.28672e-071	271.792	300	1	161	331	492	158	158	98.1	100	161	k__Fungi	p__Ascomycota	c__Eurotiomycetes	o__Eurotiales	f__Aspergillaceae	g__Penicillium	s__Penicillium_sp
OTU0898	SINGLETON | n=1	0	0	1	0	0	OR793058	SH0767731.10FU	3.39379e-069	264.578	292	1	160	362	519	155	155	96.9	99.4	161	k__Fungi	p__Ascomycota	c__Eurotiomycetes	o__Eurotiales	f__Aspergillaceae	g__Penicillium	s__Penicillium_fundyense
OTU0899	SINGLETON | n=1	0	0	0	1	0	UDB02524760	SH0977665.10FU	6.49816e-112	407.044	450	1	225	361	585	225	225	100	100	225	k__Fungi	p__Chytridiomycota	c__Spizellomycetes	o__Spizellomycetales	f__Spizellomycetaceae	g__Gallinipes	s__Gallinipes_sp
OTU0900	SINGLETON | n=1	0	1	0	0	0	OR091314	SH0801460.10FU	7.47533e-065	250.151	276	1	161	347	507	152	152	94.4	100	161	k__Fungi	p__Ascomycota	c__Eurotiomycetes	o__Phaeomoniellales	f__Celotheliaceae	g__Phaeomoniella	s__Phaeomoniella_sp
OTU0901	SINGLETON | n=1	0	1	0	0	0	UDB03955738	SH0939707.10FU	9.72338e-070	266.382	294	1	161	331	492	157	157	97.5	100	161	k__Fungi	p__Ascomycota	c__Eurotiomycetes	o__Eurotiales	f__Aspergillaceae	g__Penicillium	s__Penicillium_sp
OTU0902	SINGLETON | n=1	0	1	0	0	0	KJ406887	SH0767731.10FU	4.41441e-074	280.808	310	4	161	270	427	157	157	99.4	98.1	161	k__Fungi	p__Ascomycota	c__Eurotiomycetes	o__Eurotiales	f__Aspergillaceae	g__Penicillium	s__Penicillium_sp
OTU0903	SINGLETON | n=1	0	1	0	0	0	OR069551	SH0767731.10FU	7.98144e-071	269.988	298	1	161	331	493	158	158	98.1	100	161	k__Fungi	p__Ascomycota	c__Eurotiomycetes	o__Eurotiales	f__Aspergillaceae	g__Penicillium	s__Penicillium_corylophilum
OTU0904	SINGLETON | n=1	0	1	0	0	0	OR793058	SH0767731.10FU	3.39379e-069	264.578	292	1	161	362	521	156	156	96.9	100	161	k__Fungi	p__Ascomycota	c__Eurotiomycetes	o__Eurotiales	f__Aspergillaceae	g__Penicillium	s__Penicillium_fundyense
OTU0905	SINGLETON | n=1	0	0	0	1	0	UDB07377508	SH0977666.10FU	1.8713e-112	408.848	452	1	226	358	583	226	226	100	100	226	k__Fungi	p__Chytridiomycota	c__Spizellomycetes	o__Spizellomycetales	f__Spizellomycetaceae	g__Spizellomyces	s__Spizellomyces_sp
OTU0906	SINGLETON | n=1	0	0	0	1	0	UDB04073268	SH0939434.10FU	2.2694e-071	271.792	300	1	160	332	491	156	156	97.5	100	160	k__Fungi	p__Ascomycota	c__Eurotiomycetes	o__Eurotiales	f__Aspergillaceae	g__Penicillium	s__Penicillium_sp
OTU0907	SINGLETON | n=1	0	1	0	0	0	UDB07379847	SH0745609.10FU	7.49044e-105	383.6	424	3	227	454	678	220	220	97.8	99.1	227	k__Fungi	p__Chytridiomycota	c__Spizellomycetes	o__Spizellomycetales	f__Spizellomycetaceae	g__Spizellomycetaceae_gen_Incertae_sedis	s__Spizellomycetaceae_sp
OTU0908	SINGLETON | n=1	0	1	0	0	0	OR069551	SH0767731.10FU	1.86283e-072	275.398	304	1	160	331	493	160	160	100	100	160	k__Fungi	p__Ascomycota	c__Eurotiomycetes	o__Eurotiales	f__Aspergillaceae	g__Penicillium	s__Penicillium_corylophilum
OTU0909	SINGLETON | n=1	0	0	1	0	0	AM901832	SH0934681.10FU	2.98305e-097	358.353	396	1	227	539	762	216	216	95.2	100	227	k__Fungi	p__Basidiomycota	c__Exobasidiomycetes	o__Exobasidiales	f__Exobasidiaceae	g__Exobasidium	s__Exobasidium_sp
OTU0910	SINGLETON | n=1	0	1	0	0	0	OR793058	SH0767731.10FU	7.92097e-071	269.988	298	2	160	363	521	155	155	97.5	99.4	160	k__Fungi	p__Ascomycota	c__Eurotiomycetes	o__Eurotiales	f__Aspergillaceae	g__Penicillium	s__Penicillium_fundyense
OTU0911	SINGLETON | n=1	0	1	0	0	0	OR793058	SH0767731.10FU	1.17558e-068	262.775	290	1	160	362	521	154	154	96.3	100	160	k__Fungi	p__Ascomycota	c__Eurotiomycetes	o__Eurotiales	f__Aspergillaceae	g__Penicillium	s__Penicillium_fundyense
OTU0912	SINGLETON | n=1	0	0	0	1	0	UDB04109954	SH0874613.10FU	4.07544e-049	197.854	218	1	158	313	463	143	143	90.5	99.4	159	k__Fungi	p__Ascomycota	c__Sordariomycetes	o__Coniochaetales	f__Coniochaetaceae	g__Coniochaetaceae_gen_Incertae_sedis	s__Coniochaetaceae_sp
OTU0913	SINGLETON | n=1	1	0	0	0	0	MT813950	SH0950131.10FU	6.89523e-059	230.314	254	3	159	219	374	146	146	93	98.7	159	k__Fungi	p__Ascomycota	c__Xylonomycetes	o__Symbiotaphrinales	f__Symbiotaphrinaceae	g__Symbiotaphrina	s__Symbiotaphrina_microtheca
OTU0914	SINGLETON | n=1	0	0	1	0	0	MT813950	SH0950131.10FU	2.56961e-064	248.348	274	1	155	217	370	151	151	97.4	97.5	159	k__Fungi	p__Ascomycota	c__Xylonomycetes	o__Symbiotaphrinales	f__Symbiotaphrinaceae	g__Symbiotaphrina	s__Symbiotaphrina_microtheca
OTU0915	SINGLETON | n=1	0	0	0	0	1	UDB03083455	SH0857708.10FU	6.63146e-112	407.044	450	1	229	416	645	229	229	100	100	229	k__Fungi	p__Basidiomycota	c__Agaricomycetes	o__Agaricales	f__Stephanosporaceae	g__Lindtneria	s__Lindtneria_sp
OTU0916	SINGLETON | n=1	0	1	0	0	0	OR793058	SH0767731.10FU	2.74359e-070	268.185	296	1	158	362	519	154	154	97.5	99.4	159	k__Fungi	p__Ascomycota	c__Eurotiomycetes	o__Eurotiales	f__Aspergillaceae	g__Penicillium	s__Penicillium_fundyense
OTU0917	SINGLETON | n=1	0	1	0	0	0	MK801314	SH0950131.10FU	8.40011e-058	226.707	250	3	159	394	549	145	145	92.4	98.7	159	k__Fungi	p__Ascomycota	c__Xylonomycetes	o__Symbiotaphrinales	f__Symbiotaphrinaceae	g__Symbiotaphrina	s__Symbiotaphrina_microtheca
OTU0918	SINGLETON | n=1	0	0	0	0	1	UDB03575289	SH1011290.10FU	2.92934e-076	288.022	318	1	159	285	443	159	159	100	100	159	k__Fungi	p__Ascomycota	c__Sordariomycetes	o__Hypocreales	f__Hypocreales_fam_Incertae_sedis	g__Hypocreales_gen_Incertae_sedis	s__Hypocreales_sp
OTU0919	SINGLETON | n=1	0	0	0	1	0	UDB01409691	SH0939780.10FU	1.24559e-074	282.612	312	1	159	335	493	158	158	99.4	100	159	k__Fungi	p__Ascomycota	c__Eurotiomycetes	o__Eurotiales	f__Aspergillaceae	g__Aspergillaceae_gen_Incertae_sedis	s__Aspergillaceae_sp
OTU0920	SINGLETON | n=1	0	0	0	1	0	MK876399	SH0861571.10FU	4.64597e-061	237.528	262	1	159	371	529	148	148	93.1	100	159	k__Fungi	p__Ascomycota	c__Sordariomycetes	o__Diaporthales	f__Gnomoniaceae	g__Neognomoniopsis	s__Neognomoniopsis_quercina
OTU0921	SINGLETON | n=1	1	0	0	0	0	OQ832651	SH0856291.10FU	1.24559e-074	282.612	312	1	159	374	532	158	158	99.4	100	159	k__Fungi	p__Ascomycota	c__Dothideomycetes	o__Pleosporales	f__Pleosporaceae	g__Stemphylium	s__Stemphylium_globuliferum
OTU0922	SINGLETON | n=1	0	0	1	0	0	OR752063	SH0856613.10FU	1.01457e-075	286.219	316	1	158	368	525	158	158	100	100	158	k__Fungi	p__Ascomycota	c__Dothideomycetes	o__Pleosporales	f__Pleosporaceae	g__Alternaria	s__Alternaria_infectoria
OTU0923	SINGLETON | n=1	0	1	0	0	0	OQ696196	SH0762921.10FU	4.92236e-067	257.365	284	1	158	378	536	153	153	96.8	100	158	k__Fungi	p__Ascomycota	c__Sordariomycetes	o__Xylariales	f__Leptosilliaceae	g__Leptosillia	s__Leptosillia_pistaciae
OTU0924	SINGLETON | n=1	0	0	0	1	0	UDB03020589	SH0959251.10FU	1.83439e-072	275.398	304	1	155	338	492	154	154	99.4	98.1	158	k__Fungi	p__Ascomycota	c__Eurotiomycetes	o__Chaetothyriales	f__Herpotrichiellaceae	g__Cladophialophora	s__Cladophialophora_sp
OTU0925	SINGLETON | n=1	0	1	0	0	0	MT813950	SH0950131.10FU	7.2488e-065	250.151	276	1	153	217	368	148	148	96.7	97.5	157	k__Fungi	p__Ascomycota	c__Xylonomycetes	o__Symbiotaphrinales	f__Symbiotaphrinaceae	g__Symbiotaphrina	s__Symbiotaphrina_microtheca
OTU0926	SINGLETON | n=1	0	1	0	0	0	KY102575	SH0733981.10FU	1.68487e-081	306.056	338	4	231	330	558	206	206	90.4	98.7	231	k__Fungi	p__Basidiomycota	c__Microbotryomycetes	o__Microbotryomycetes_ord_Incertae_sedis	f__Colacogloeaceae	g__Colacogloea	s__Colacogloea_philyla
OTU0927	SINGLETON | n=1	1	0	0	0	0	OP046435	SH0760250.10FU	4.5356e-114	414.258	458	1	232	574	805	231	231	99.6	100	232	k__Fungi	p__Ascomycota	c__Saccharomycetes	o__Saccharomycetales	f__Saccharomycetaceae	g__Saccharomyces	s__Saccharomyces_cerevisiae
OTU0928	SINGLETON | n=1	1	0	0	0	0	MZ133732	SH0875505.10FU	5.95544e-047	190.64	210	1	157	421	584	142	142	90.4	100	157	k__Fungi	p__Ascomycota	c__Eurotiomycetes	o__Onygenales	f__Gymnoascaceae	g__Gymnoascus	s__Gymnoascus_halophilus
OTU0929	SINGLETON | n=1	0	0	0	0	1	KF993413	SH0860897.10FU	3.51376e-075	284.415	314	1	157	317	473	157	157	100	100	157	k__Fungi	p__Ascomycota	c__Dothideomycetes	o__Pleosporales	f__Lophiotremataceae	g__Lophiotrema	s__Lophiotrema_rubi
OTU0930	SINGLETON | n=1	1	0	0	0	0	MH862405	SH0950131.10FU	1.07582e-062	242.938	268	1	153	345	498	147	147	96.1	97.5	157	k__Fungi	p__Ascomycota	c__Xylonomycetes	o__Symbiotaphrinales	f__Symbiotaphrinaceae	g__Symbiotaphrina	s__Symbiotaphrina_lignicola
OTU0931	SINGLETON | n=1	0	0	0	1	0	UDB04249993	SH0939769.10FU	9.99727e-057	223.101	246	1	156	329	484	143	143	91.7	100	156	k__Fungi	p__Ascomycota	c__Eurotiomycetes	o__Eurotiales	f__Aspergillaceae	g__Penicillium	s__Penicillium_sp
OTU0932	SINGLETON | n=1	0	0	0	1	0	UDB05409486	SH0870975.10FU	1.21684e-074	282.612	312	1	156	297	452	156	156	100	100	156	k__Fungi	p__Ascomycota	c__Eurotiomycetes	o__Eurotiales	f__Trichocomaceae	g__Talaromyces	s__Talaromyces_sp
OTU0933	SINGLETON | n=1	0	0	0	1	0	OQ865227	SH0844894.10FU	6.3034e-072	273.595	302	1	156	316	471	154	154	98.7	100	156	k__Fungi	p__Ascomycota	c__Sordariomycetes	o__Xylariales	f__Xylariaceae	g__Xylaria	s__Xylaria_sicula
OTU0934	SINGLETON | n=1	1	0	0	0	0	KT265804	SH0733984.10FU	1.3135e-095	352.943	390	1	232	883	1113	218	218	94	99.1	234	k__Fungi	p__Basidiomycota	c__Microbotryomycetes	o__Sporidiobolales	f__Sporidiobolaceae	g__Rhodotorula	s__Rhodotorula_sp
OTU0935	SINGLETON | n=1	0	1	0	0	0	UDB03123353	SH0924986.10FU	4.80789e-067	257.365	284	1	155	329	483	150	150	96.8	100	155	k__Fungi	p__Ascomycota	c__Dothideomycetes	o__Mytilinidiales	f__Mytilinidiaceae	g__Lophium	s__Lophium_sp
OTU0936	SINGLETON | n=1	0	1	0	0	0	UDB03123353	SH0924986.10FU	4.80789e-067	257.365	284	1	155	329	483	150	150	96.8	100	155	k__Fungi	p__Ascomycota	c__Dothideomycetes	o__Mytilinidiales	f__Mytilinidiaceae	g__Lophium	s__Lophium_sp
OTU0937	SINGLETON | n=1	0	0	0	1	0	UDB06715031	SH0847408.10FU	1.08251e-115	419.668	464	1	235	365	599	234	234	99.6	100	235	k__Fungi	p__Rozellomycota	c__Rozellomycota_cls_Incertae_sedis	o__Rozellomycota_ord_Incertae_sedis	f__Rozellomycota_fam_Incertae_sedis	g__Rozellomycota_gen_Incertae_sedis	s__Rozellomycota_sp
OTU0938	SINGLETON | n=1	0	0	1	0	0	MW710094	SH0733979.10FU	6.42943e-106	387.207	428	1	236	324	558	228	228	96.6	100	236	k__Fungi	p__Basidiomycota	c__Microbotryomycetes	o__Microbotryomycetes_ord_Incertae_sedis	f__Colacogloeaceae	g__Colacogloea	s__Colacogloea_philyla
OTU0939	SINGLETON | n=1	1	0	0	0	0	UDB03038609	SH0965249.10FU	1.79173e-072	275.398	304	1	155	350	504	154	154	99.4	100	155	k__Fungi	p__Ascomycota	c__Dothideomycetes	o__Pleosporales	f__Phaeosphaeriaceae	g__Leptospora	s__Leptospora_sp
OTU0940	SINGLETON | n=1	0	1	0	0	0	MH188916	SH0926074.10FU	7.33597e-099	363.763	402	1	236	347	584	226	226	95.8	100	236	k__Fungi	p__Basidiomycota	c__Exobasidiomycetes	o__Exobasidiales	f__Exobasidiales_fam_Incertae_sedis	g__Guomyces	s__Guomyces_nicotianae
OTU0941	SINGLETON | n=1	0	0	1	0	0
OTU0942	SINGLETON | n=1	1	0	0	0	0	MW842891	SH0801445.10FU	1.79173e-072	275.398	304	1	155	337	491	154	154	99.4	100	155	k__Fungi	p__Fungi_phy_Incertae_sedis	c__Fungi_cls_Incertae_sedis	o__Fungi_ord_Incertae_sedis	f__Fungi_fam_Incertae_sedis	g__Fungi_gen_Incertae_sedis	s__Fungi_sp
OTU0943	SINGLETON | n=1	0	1	0	0	0	KM104110	SH0967380.10FU	6.63003e-059	230.314	254	1	151	366	517	143	143	94.7	98.1	154	k__Fungi	p__Fungi_phy_Incertae_sedis	c__Fungi_cls_Incertae_sedis	o__Fungi_ord_Incertae_sedis	f__Fungi_fam_Incertae_sedis	g__Fungi_gen_Incertae_sedis	s__Fungi_sp
OTU0944	SINGLETON | n=1	1	0	0	0	0	MW710094	SH0733979.10FU	4.33211e-108	394.421	436	1	236	324	558	232	232	98.3	100	236	k__Fungi	p__Basidiomycota	c__Microbotryomycetes	o__Microbotryomycetes_ord_Incertae_sedis	f__Colacogloeaceae	g__Colacogloea	s__Colacogloea_philyla
OTU0945	SINGLETON | n=1	0	0	0	1	0	UDB04930270	SH0867734.10FU	2.11013e-118	428.685	474	1	237	309	545	237	237	100	100	237	k__Fungi	p__Mortierellomycota	c__Mortierellomycetes	o__Mortierellales	f__Mortierellaceae	g__Mortierella	s__Mortierella_sp
OTU0946	SINGLETON | n=1	1	0	0	0	0	OQ718080	SH0738016.10FU	1.2799e-061	239.331	264	1	146	373	519	142	142	97.3	94.8	154	k__Fungi	p__Ascomycota	c__Sareomycetes	o__Sareales	f__Sareaceae	g__Sarea	s__Sarea_coeloplata
OTU0947	SINGLETON | n=1	0	0	1	0	0	MT237021	SH0905236.10FU	1.56199e-022	109.488	120	2	125	378	502	100	100	80.6	80.5	154	k__Fungi	p__Fungi_phy_Incertae_sedis	c__Fungi_cls_Incertae_sedis	o__Fungi_ord_Incertae_sedis	f__Fungi_fam_Incertae_sedis	g__Fungi_gen_Incertae_sedis	s__Fungi_sp
OTU0948	SINGLETON | n=1	0	1	0	0	0	MH188916	SH0926074.10FU	1.16811e-102	376.387	416	1	237	347	584	229	229	96.6	100	237	k__Fungi	p__Basidiomycota	c__Exobasidiomycetes	o__Exobasidiales	f__Exobasidiales_fam_Incertae_sedis	g__Guomyces	s__Guomyces_nicotianae
OTU0949	SINGLETON | n=1	0	1	0	0	0	OR803414	SH0925964.10FU	6.20413e-072	273.595	302	1	154	368	521	153	153	99.4	100	154	k__Fungi	p__Ascomycota	c__Dothideomycetes	o__Dothideales	f__Saccotheciaceae	g__Aureobasidium	s__Aureobasidium_sp
OTU0950	SINGLETON | n=1	1	0	0	0	0	MH188916	SH0926074.10FU	2.7604e-104	381.797	422	1	229	347	575	224	224	97.8	96.2	238	k__Fungi	p__Basidiomycota	c__Exobasidiomycetes	o__Exobasidiales	f__Exobasidiales_fam_Incertae_sedis	g__Guomyces	s__Guomyces_nicotianae
OTU0951	SINGLETON | n=1	1	0	0	0	0	MH188916	SH0926074.10FU	9.63476e-104	379.994	420	1	238	347	584	229	229	96.2	100	238	k__Fungi	p__Basidiomycota	c__Exobasidiomycetes	o__Exobasidiales	f__Exobasidiales_fam_Incertae_sedis	g__Guomyces	s__Guomyces_nicotianae
OTU0952	SINGLETON | n=1	0	0	1	0	0
OTU0953	SINGLETON | n=1	0	0	1	0	0	MH188916	SH0926074.10FU	3.36286e-103	378.19	418	1	238	347	585	230	230	96.6	100	238	k__Fungi	p__Basidiomycota	c__Exobasidiomycetes	o__Exobasidiales	f__Exobasidiales_fam_Incertae_sedis	g__Guomyces	s__Guomyces_nicotianae
OTU0954	SINGLETON | n=1	0	1	0	0	0	OM337566	SH0969905.10FU	2.58308e-117	425.078	470	1	238	489	726	237	237	99.6	100	238	k__Fungi	p__Basidiomycota	c__Exobasidiomycetes	o__Microstromatales	f__Microstromatales_fam_Incertae_sedis	g__Pseudomicrostroma	s__Pseudomicrostroma_glucosiphilum
OTU0955	SINGLETON | n=1	1	0	0	0	0	MH188916	SH0926074.10FU	9.63476e-104	379.994	420	1	238	347	584	229	229	96.2	100	238	k__Fungi	p__Basidiomycota	c__Exobasidiomycetes	o__Exobasidiales	f__Exobasidiales_fam_Incertae_sedis	g__Guomyces	s__Guomyces_nicotianae
OTU0956	SINGLETON | n=1	0	1	0	0	0	MH188916	SH0926074.10FU	4.99093e-101	370.977	410	1	238	347	584	227	227	95.4	100	238	k__Fungi	p__Basidiomycota	c__Exobasidiomycetes	o__Exobasidiales	f__Exobasidiales_fam_Incertae_sedis	g__Guomyces	s__Guomyces_nicotianae
OTU0957	SINGLETON | n=1	0	0	1	0	0	MH188916	SH0926074.10FU	2.12407e-080	302.449	334	1	238	347	584	212	212	89.1	100	238	k__Fungi	p__Basidiomycota	c__Exobasidiomycetes	o__Exobasidiales	f__Exobasidiales_fam_Incertae_sedis	g__Guomyces	s__Guomyces_nicotianae
OTU0958	SINGLETON | n=1	0	1	0	0	0	MH188916	SH0926074.10FU	9.63476e-104	379.994	420	1	238	347	584	229	229	96.2	100	238	k__Fungi	p__Basidiomycota	c__Exobasidiomycetes	o__Exobasidiales	f__Exobasidiales_fam_Incertae_sedis	g__Guomyces	s__Guomyces_nicotianae
OTU0959	SINGLETON | n=1	0	0	1	0	0	MT809296	SH0737869.10FU	1.99569e-065	251.955	278	1	152	352	503	147	147	96.7	100	152	k__Fungi	p__Ascomycota	c__Sareomycetes	o__Sareales	f__Sareaceae	g__Sarea	s__Sarea_sp
OTU0960	SINGLETON | n=1	1	0	0	0	0	MT872624	SH0912804.10FU	1.03379e-062	242.938	268	1	152	578	729	145	145	95.4	100	152	k__Fungi	p__Ascomycota	c__Eurotiomycetes	o__Eurotiomycetes_ord_Incertae_sedis	f__Eurotiomycetes_fam_Incertae_sedis	g__Eurotiomycetes_gen_Incertae_sedis	s__Eurotiomycetes_sp
OTU0961	SINGLETON | n=1	0	0	0	0	1	UDB04937995	SH0879619.10FU	7.43623e-118	426.881	472	1	239	314	552	238	238	99.6	100	239	k__Fungi	p__Mortierellomycota	c__Mortierellomycetes	o__Mortierellales	f__Mortierellaceae	g__Mortierella	s__Mortierella_sp
OTU0962	SINGLETON | n=1	1	0	0	0	0	MT872624	SH0912804.10FU	1.03379e-062	242.938	268	1	152	578	729	145	145	95.4	100	152	k__Fungi	p__Ascomycota	c__Eurotiomycetes	o__Eurotiomycetes_ord_Incertae_sedis	f__Eurotiomycetes_fam_Incertae_sedis	g__Eurotiomycetes_gen_Incertae_sedis	s__Eurotiomycetes_sp
OTU0963	SINGLETON | n=1	0	0	0	0	1	UDB07674095	SH0761887.10FU	1.74907e-072	275.398	304	1	152	771	922	152	152	100	100	152	k__Fungi	p__Ascomycota	c__Eurotiomycetes	o__Verrucariales	f__Verrucariaceae	g__Verrucaria	s__Verrucaria_muralis
OTU0964	SINGLETON | n=1	0	1	0	0	0	MT872624	SH0912804.10FU	1.03379e-062	242.938	268	1	152	578	729	145	145	95.4	100	152	k__Fungi	p__Ascomycota	c__Eurotiomycetes	o__Eurotiomycetes_ord_Incertae_sedis	f__Eurotiomycetes_fam_Incertae_sedis	g__Eurotiomycetes_gen_Incertae_sedis	s__Eurotiomycetes_sp
OTU0965	SINGLETON | n=1	0	0	1	0	0	MT872624	SH0912804.10FU	1.99569e-065	251.955	278	1	152	578	729	147	147	96.7	100	152	k__Fungi	p__Ascomycota	c__Eurotiomycetes	o__Eurotiomycetes_ord_Incertae_sedis	f__Eurotiomycetes_fam_Incertae_sedis	g__Eurotiomycetes_gen_Incertae_sedis	s__Eurotiomycetes_sp
OTU0966	SINGLETON | n=1	0	0	0	1	0	UDB06017674	SH0944239.10FU	1.77394e-119	432.291	478	1	242	348	589	241	241	99.6	100	242	k__Fungi	p__Basidiomycota	c__Agaricomycetes	o__Russulales	f__Russulaceae	g__Russula	s__Russula_sp
OTU0967	SINGLETON | n=1	1	0	0	0	0	DQ870625	SH0880564.10FU	1.20409e-064	250.151	276	1	238	356	590	205	205	86.1	97.9	243	k__Fungi	p__Basidiomycota	c__Microbotryomycetes	o__Microbotryomycetes_ord_Incertae_sedis	f__Colacogloeaceae	g__Colacogloea	s__Colacogloea_subericola
OTU0968	SINGLETON | n=1	0	0	1	0	0
OTU0969	SINGLETON | n=1	1	0	0	0	0	MT872624	SH0912804.10FU	1.24918e-061	239.331	264	1	151	578	729	145	145	96	100	151	k__Fungi	p__Ascomycota	c__Eurotiomycetes	o__Eurotiomycetes_ord_Incertae_sedis	f__Eurotiomycetes_fam_Incertae_sedis	g__Eurotiomycetes_gen_Incertae_sedis	s__Eurotiomycetes_sp
OTU0970	SINGLETON | n=1	0	0	1	0	0	GU062229	SH0926075.10FU	1.47935e-082	309.662	342	1	235	308	548	215	215	91.5	95.9	245	k__Fungi	p__Basidiomycota	c__Basidiomycota_cls_Incertae_sedis	o__Basidiomycota_ord_Incertae_sedis	f__Basidiomycota_fam_Incertae_sedis	g__Basidiomycota_gen_Incertae_sedis	s__Basidiomycota_sp
OTU0971	SINGLETON | n=1	0	0	1	0	0	GU062229	SH0926075.10FU	6.29037e-081	304.252	336	1	235	308	548	214	214	91.1	95.9	245	k__Fungi	p__Basidiomycota	c__Basidiomycota_cls_Incertae_sedis	o__Basidiomycota_ord_Incertae_sedis	f__Basidiomycota_fam_Incertae_sedis	g__Basidiomycota_gen_Incertae_sedis	s__Basidiomycota_sp
OTU0972	SINGLETON | n=1	0	1	0	0	0	MT872626	SH0912803.10FU	1.24918e-061	239.331	264	1	148	1577	1725	143	143	96.6	98	151	k__Fungi	p__Ascomycota	c__Eurotiomycetes	o__Eurotiomycetes_ord_Incertae_sedis	f__Eurotiomycetes_fam_Incertae_sedis	g__Eurotiomycetes_gen_Incertae_sedis	s__Eurotiomycetes_sp
OTU0973	SINGLETON | n=1	1	0	0	0	0	MT872624	SH0912804.10FU	5.67127e-066	253.758	280	1	151	578	729	148	148	98	100	151	k__Fungi	p__Ascomycota	c__Eurotiomycetes	o__Eurotiomycetes_ord_Incertae_sedis	f__Eurotiomycetes_fam_Incertae_sedis	g__Eurotiomycetes_gen_Incertae_sedis	s__Eurotiomycetes_sp
OTU0974	SINGLETON | n=1	0	1	0	0	0	GU062229	SH0926075.10FU	1.07417e-090	336.713	372	1	237	308	548	222	222	93.7	96	247	k__Fungi	p__Basidiomycota	c__Basidiomycota_cls_Incertae_sedis	o__Basidiomycota_ord_Incertae_sedis	f__Basidiomycota_fam_Incertae_sedis	g__Basidiomycota_gen_Incertae_sedis	s__Basidiomycota_sp
OTU0975	SINGLETON | n=1	1	0	0	0	0	MT872624	SH0912804.10FU	1.24918e-061	239.331	264	1	151	578	729	145	145	96	100	151	k__Fungi	p__Ascomycota	c__Eurotiomycetes	o__Eurotiomycetes_ord_Incertae_sedis	f__Eurotiomycetes_fam_Incertae_sedis	g__Eurotiomycetes_gen_Incertae_sedis	s__Eurotiomycetes_sp
OTU0976	SINGLETON | n=1	1	0	0	0	0	MH535871	SH0912800.10FU	6.05523e-072	273.595	302	1	151	606	756	151	151	100	100	151	k__Fungi	p__Ascomycota	c__Dothideomycetes	o__Hysteriales	f__Hysteriaceae	g__Gloniopsis	s__Gloniopsis_subrugosa
OTU0977	SINGLETON | n=1	0	0	1	0	0	UDB06716930	SH1032075.10FU	2.39806e-007	58.9941	64	25	94	296	365	57	57	81.4	46.7	150	k__Fungi	p__Rozellomycota	c__Rozellomycota_cls_Incertae_sedis	o__Rozellomycota_ord_Incertae_sedis	f__Rozellomycota_fam_Incertae_sedis	g__Rozellomycota_gen_Incertae_sedis	s__Rozellomycota_sp
OTU0978	SINGLETON | n=1	0	0	1	0	0	MT872624	SH0912804.10FU	7.82547e-039	163.589	180	1	150	578	729	129	129	86	100	150	k__Fungi	p__Ascomycota	c__Eurotiomycetes	o__Eurotiomycetes_ord_Incertae_sedis	f__Eurotiomycetes_fam_Incertae_sedis	g__Eurotiomycetes_gen_Incertae_sedis	s__Eurotiomycetes_sp
OTU0979	SINGLETON | n=1	0	0	0	0	1	UDB04938801	SH0960692.10FU	2.90382e-123	444.915	492	1	249	304	552	248	248	99.6	100	249	k__Fungi	p__Mortierellomycota	c__Mortierellomycetes	o__Mortierellales	f__Mortierellaceae	g__Mortierella	s__Mortierella_sp
OTU0980	SINGLETON | n=1	0	0	1	0	0	FR682353	SH0763657.10FU	3.78995e-068	260.971	288	1	150	328	478	149	149	99.3	100	150	k__Fungi	p__Ascomycota	c__Dothideomycetes	o__Mycosphaerellales	f__Neodevriesiaceae	g__Neodevriesia	s__Neodevriesia_knoxdaviesii
OTU0981	SINGLETON | n=1	0	0	1	0	0	UDB05247480	SH0740742.10FU	3.7933e-049	197.854	218	1	150	347	497	135	135	90	100	150	k__Fungi	p__Ascomycota	c__Dothideomycetes	o__Dothideales	f__Dothideales_fam_Incertae_sedis	g__Pringsheimia	s__Pringsheimia_sp
OTU0982	SINGLETON | n=1	0	0	1	0	0	MT872624	SH0912804.10FU	2.55816e-032	141.949	156	1	150	578	729	124	124	82.7	100	150	k__Fungi	p__Ascomycota	c__Eurotiomycetes	o__Eurotiomycetes_ord_Incertae_sedis	f__Eurotiomycetes_fam_Incertae_sedis	g__Eurotiomycetes_gen_Incertae_sedis	s__Eurotiomycetes_sp
OTU0983	SINGLETON | n=1	0	0	1	0	0	MT872624	SH0912804.10FU	1.84037e-040	169	186	1	150	578	729	130	130	86.7	100	150	k__Fungi	p__Ascomycota	c__Eurotiomycetes	o__Eurotiomycetes_ord_Incertae_sedis	f__Eurotiomycetes_fam_Incertae_sedis	g__Eurotiomycetes_gen_Incertae_sedis	s__Eurotiomycetes_sp
OTU0984	SINGLETON | n=1	0	0	1	0	0	GU062229	SH0926075.10FU	7.49788e-112	407.044	450	1	251	308	561	245	245	97.6	98.4	255	k__Fungi	p__Basidiomycota	c__Basidiomycota_cls_Incertae_sedis	o__Basidiomycota_ord_Incertae_sedis	f__Basidiomycota_fam_Incertae_sedis	g__Basidiomycota_gen_Incertae_sedis	s__Basidiomycota_sp
OTU0985	SINGLETON | n=1	0	1	0	0	0	GU062229	SH0926075.10FU	3.40403e-116	421.471	466	1	251	308	561	246	246	98	98.4	255	k__Fungi	p__Basidiomycota	c__Basidiomycota_cls_Incertae_sedis	o__Basidiomycota_ord_Incertae_sedis	f__Basidiomycota_fam_Incertae_sedis	g__Basidiomycota_gen_Incertae_sedis	s__Basidiomycota_sp
OTU0986	SINGLETON | n=1	1	0	0	0	0	MT872624	SH0912804.10FU	3.55276e-043	178.016	196	1	150	578	729	132	132	88	100	150	k__Fungi	p__Ascomycota	c__Eurotiomycetes	o__Eurotiomycetes_ord_Incertae_sedis	f__Eurotiomycetes_fam_Incertae_sedis	g__Eurotiomycetes_gen_Incertae_sedis	s__Eurotiomycetes_sp
OTU0987	SINGLETON | n=1	0	0	1	0	0	GU062229	SH0926075.10FU	3.40403e-116	421.471	466	1	251	308	561	247	247	98.4	98.4	255	k__Fungi	p__Basidiomycota	c__Basidiomycota_cls_Incertae_sedis	o__Basidiomycota_ord_Incertae_sedis	f__Basidiomycota_fam_Incertae_sedis	g__Basidiomycota_gen_Incertae_sedis	s__Basidiomycota_sp
OTU0988	SINGLETON | n=1	0	0	0	1	0	OP932999	SH0777285.10FU	6.15463e-113	410.651	454	1	255	370	624	244	244	95.7	100	255	k__Fungi	p__Mortierellomycota	c__Mortierellomycetes	o__Mortierellales	f__Mortierellaceae	g__Mortierella	s__Mortierella_sp
OTU0989	SINGLETON | n=1	0	1	0	0	0	GU062229	SH0926075.10FU	1.76333e-113	412.454	456	1	251	308	561	245	245	97.6	98.4	255	k__Fungi	p__Basidiomycota	c__Basidiomycota_cls_Incertae_sedis	o__Basidiomycota_ord_Incertae_sedis	f__Basidiomycota_fam_Incertae_sedis	g__Basidiomycota_gen_Incertae_sedis	s__Basidiomycota_sp
OTU0990	SINGLETON | n=1	0	1	0	0	0	GU062229	SH0926075.10FU	3.40403e-116	421.471	466	1	251	308	561	246	246	98	98.4	255	k__Fungi	p__Basidiomycota	c__Basidiomycota_cls_Incertae_sedis	o__Basidiomycota_ord_Incertae_sedis	f__Basidiomycota_fam_Incertae_sedis	g__Basidiomycota_gen_Incertae_sedis	s__Basidiomycota_sp
OTU0991	SINGLETON | n=1	1	0	0	0	0	GU062229	SH0926075.10FU	1.1934e-115	419.668	464	1	252	308	561	246	246	97.6	98.4	256	k__Fungi	p__Basidiomycota	c__Basidiomycota_cls_Incertae_sedis	o__Basidiomycota_ord_Incertae_sedis	f__Basidiomycota_fam_Incertae_sedis	g__Basidiomycota_gen_Incertae_sedis	s__Basidiomycota_sp
OTU0992	SINGLETON | n=1	0	0	1	0	0	GU062229	SH0926075.10FU	3.90126e-109	398.027	440	1	252	308	561	241	241	95.6	98.4	256	k__Fungi	p__Basidiomycota	c__Basidiomycota_cls_Incertae_sedis	o__Basidiomycota_ord_Incertae_sedis	f__Basidiomycota_fam_Incertae_sedis	g__Basidiomycota_gen_Incertae_sedis	s__Basidiomycota_sp
OTU0993	SINGLETON | n=1	0	0	1	0	0	GU062229	SH0926075.10FU	2.64028e-111	405.241	448	1	253	308	561	244	244	96.4	98.4	257	k__Fungi	p__Basidiomycota	c__Basidiomycota_cls_Incertae_sedis	o__Basidiomycota_ord_Incertae_sedis	f__Basidiomycota_fam_Incertae_sedis	g__Basidiomycota_gen_Incertae_sedis	s__Basidiomycota_sp
OTU0994	SINGLETON | n=1	0	1	0	0	0	MT872624	SH0912804.10FU	1.84037e-040	169	186	1	150	578	729	130	130	86.7	100	150	k__Fungi	p__Ascomycota	c__Eurotiomycetes	o__Eurotiomycetes_ord_Incertae_sedis	f__Eurotiomycetes_fam_Incertae_sedis	g__Eurotiomycetes_gen_Incertae_sedis	s__Eurotiomycetes_sp
OTU0995	SINGLETON | n=1	0	0	1	0	0	GU062229	SH0926075.10FU	8.08381e-099	363.763	402	1	253	308	561	235	235	92.9	98.4	257	k__Fungi	p__Basidiomycota	c__Basidiomycota_cls_Incertae_sedis	o__Basidiomycota_ord_Incertae_sedis	f__Basidiomycota_fam_Incertae_sedis	g__Basidiomycota_gen_Incertae_sedis	s__Basidiomycota_sp
OTU0996	SINGLETON | n=1	1	0	0	0	0	GU062229	SH0926075.10FU	2.31401e-118	428.685	474	1	253	308	561	248	248	98	98.4	257	k__Fungi	p__Basidiomycota	c__Basidiomycota_cls_Incertae_sedis	o__Basidiomycota_ord_Incertae_sedis	f__Basidiomycota_fam_Incertae_sedis	g__Basidiomycota_gen_Incertae_sedis	s__Basidiomycota_sp
OTU0997	SINGLETON | n=1	1	0	0	0	0	GU062229	SH0926075.10FU	1.3677e-108	396.224	438	1	253	308	561	242	242	95.7	98.4	257	k__Fungi	p__Basidiomycota	c__Basidiomycota_cls_Incertae_sedis	o__Basidiomycota_ord_Incertae_sedis	f__Basidiomycota_fam_Incertae_sedis	g__Basidiomycota_gen_Incertae_sedis	s__Basidiomycota_sp
OTU0998	SINGLETON | n=1	1	0	0	0	0	GU062229	SH0926075.10FU	5.11939e-114	414.258	458	1	254	308	561	244	244	96.1	98.4	258	k__Fungi	p__Basidiomycota	c__Basidiomycota_cls_Incertae_sedis	o__Basidiomycota_ord_Incertae_sedis	f__Basidiomycota_fam_Incertae_sedis	g__Basidiomycota_gen_Incertae_sedis	s__Basidiomycota_sp
OTU0999	SINGLETON | n=1	1	0	0	0	0	GU062229	SH0926075.10FU	9.88275e-117	423.275	468	1	254	308	561	246	246	96.9	98.4	258	k__Fungi	p__Basidiomycota	c__Basidiomycota_cls_Incertae_sedis	o__Basidiomycota_ord_Incertae_sedis	f__Basidiomycota_fam_Incertae_sedis	g__Basidiomycota_gen_Incertae_sedis	s__Basidiomycota_sp
OTU1000	SINGLETON | n=1	1	0	0	0	0	GU062229	SH0926075.10FU	9.88275e-117	423.275	468	1	254	308	561	246	246	96.9	98.4	258	k__Fungi	p__Basidiomycota	c__Basidiomycota_cls_Incertae_sedis	o__Basidiomycota_ord_Incertae_sedis	f__Basidiomycota_fam_Incertae_sedis	g__Basidiomycota_gen_Incertae_sedis	s__Basidiomycota_sp
OTU1001	SINGLETON | n=1	1	0	0	0	0	GU062229	SH0926075.10FU	5.11939e-114	414.258	458	1	254	308	561	244	244	96.1	98.4	258	k__Fungi	p__Basidiomycota	c__Basidiomycota_cls_Incertae_sedis	o__Basidiomycota_ord_Incertae_sedis	f__Basidiomycota_fam_Incertae_sedis	g__Basidiomycota_gen_Incertae_sedis	s__Basidiomycota_sp
OTU1002	SINGLETON | n=1	1	0	0	0	0	GU062229	SH0926075.10FU	2.17682e-112	408.848	452	1	254	308	561	243	243	95.7	98.4	258	k__Fungi	p__Basidiomycota	c__Basidiomycota_cls_Incertae_sedis	o__Basidiomycota_ord_Incertae_sedis	f__Basidiomycota_fam_Incertae_sedis	g__Basidiomycota_gen_Incertae_sedis	s__Basidiomycota_sp
OTU1003	SINGLETON | n=1	0	0	1	0	0	GU062229	SH0926075.10FU	1.12762e-109	399.831	442	1	254	308	561	241	241	94.9	98.4	258	k__Fungi	p__Basidiomycota	c__Basidiomycota_cls_Incertae_sedis	o__Basidiomycota_ord_Incertae_sedis	f__Basidiomycota_fam_Incertae_sedis	g__Basidiomycota_gen_Incertae_sedis	s__Basidiomycota_sp
OTU1004	SINGLETON | n=1	0	1	0	0	0	GU062229	SH0926075.10FU	4.20225e-115	417.864	462	1	254	308	561	245	245	96.5	98.4	258	k__Fungi	p__Basidiomycota	c__Basidiomycota_cls_Incertae_sedis	o__Basidiomycota_ord_Incertae_sedis	f__Basidiomycota_fam_Incertae_sedis	g__Basidiomycota_gen_Incertae_sedis	s__Basidiomycota_sp
OTU1005	SINGLETON | n=1	0	0	1	0	0	GU062229	SH0926075.10FU	9.88275e-117	423.275	468	1	254	308	561	246	246	96.9	98.4	258	k__Fungi	p__Basidiomycota	c__Basidiomycota_cls_Incertae_sedis	o__Basidiomycota_ord_Incertae_sedis	f__Basidiomycota_fam_Incertae_sedis	g__Basidiomycota_gen_Incertae_sedis	s__Basidiomycota_sp
OTU1006	SINGLETON | n=1	0	0	1	0	0	GU062229	SH0926075.10FU	9.88275e-117	423.275	468	1	254	308	561	246	246	96.9	98.4	258	k__Fungi	p__Basidiomycota	c__Basidiomycota_cls_Incertae_sedis	o__Basidiomycota_ord_Incertae_sedis	f__Basidiomycota_fam_Incertae_sedis	g__Basidiomycota_gen_Incertae_sedis	s__Basidiomycota_sp
OTU1007	SINGLETON | n=1	0	1	0	0	0	GU062229	SH0926075.10FU	4.20225e-115	417.864	462	1	254	308	561	245	245	96.5	98.4	258	k__Fungi	p__Basidiomycota	c__Basidiomycota_cls_Incertae_sedis	o__Basidiomycota_ord_Incertae_sedis	f__Basidiomycota_fam_Incertae_sedis	g__Basidiomycota_gen_Incertae_sedis	s__Basidiomycota_sp
OTU1008	SINGLETON | n=1	0	1	0	0	0	GU062229	SH0926075.10FU	4.20225e-115	417.864	462	1	254	308	561	245	245	96.5	98.4	258	k__Fungi	p__Basidiomycota	c__Basidiomycota_cls_Incertae_sedis	o__Basidiomycota_ord_Incertae_sedis	f__Basidiomycota_fam_Incertae_sedis	g__Basidiomycota_gen_Incertae_sedis	s__Basidiomycota_sp
OTU1009	SINGLETON | n=1	0	0	1	0	0	GU062229	SH0926075.10FU	2.65191e-111	405.241	448	1	254	308	561	242	242	95.3	98.4	258	k__Fungi	p__Basidiomycota	c__Basidiomycota_cls_Incertae_sedis	o__Basidiomycota_ord_Incertae_sedis	f__Basidiomycota_fam_Incertae_sedis	g__Basidiomycota_gen_Incertae_sedis	s__Basidiomycota_sp
OTU1010	SINGLETON | n=1	0	1	0	0	0	GU062229	SH0926075.10FU	4.20225e-115	417.864	462	1	254	308	561	245	245	96.5	98.4	258	k__Fungi	p__Basidiomycota	c__Basidiomycota_cls_Incertae_sedis	o__Basidiomycota_ord_Incertae_sedis	f__Basidiomycota_fam_Incertae_sedis	g__Basidiomycota_gen_Incertae_sedis	s__Basidiomycota_sp
OTU1011	SINGLETON | n=1	1	0	0	0	0	GU062229	SH0926075.10FU	1.12762e-109	399.831	442	1	254	308	561	241	241	94.9	98.4	258	k__Fungi	p__Basidiomycota	c__Basidiomycota_cls_Incertae_sedis	o__Basidiomycota_ord_Incertae_sedis	f__Basidiomycota_fam_Incertae_sedis	g__Basidiomycota_gen_Incertae_sedis	s__Basidiomycota_sp
OTU1012	SINGLETON | n=1	1	0	0	0	0	GU062229	SH0926075.10FU	4.20225e-115	417.864	462	1	254	308	561	245	245	96.5	98.4	258	k__Fungi	p__Basidiomycota	c__Basidiomycota_cls_Incertae_sedis	o__Basidiomycota_ord_Incertae_sedis	f__Basidiomycota_fam_Incertae_sedis	g__Basidiomycota_gen_Incertae_sedis	s__Basidiomycota_sp
OTU1013	SINGLETON | n=1	1	0	0	0	0	GU062229	SH0926075.10FU	4.20225e-115	417.864	462	1	254	308	561	245	245	96.5	98.4	258	k__Fungi	p__Basidiomycota	c__Basidiomycota_cls_Incertae_sedis	o__Basidiomycota_ord_Incertae_sedis	f__Basidiomycota_fam_Incertae_sedis	g__Basidiomycota_gen_Incertae_sedis	s__Basidiomycota_sp
OTU1014	SINGLETON | n=1	1	0	0	0	0	GU062229	SH0926075.10FU	9.88275e-117	423.275	468	1	254	308	561	246	246	96.9	98.4	258	k__Fungi	p__Basidiomycota	c__Basidiomycota_cls_Incertae_sedis	o__Basidiomycota_ord_Incertae_sedis	f__Basidiomycota_fam_Incertae_sedis	g__Basidiomycota_gen_Incertae_sedis	s__Basidiomycota_sp
OTU1015	SINGLETON | n=1	0	0	1	0	0	GU062229	SH0926075.10FU	5.11939e-114	414.258	458	1	254	308	561	244	244	96.1	98.4	258	k__Fungi	p__Basidiomycota	c__Basidiomycota_cls_Incertae_sedis	o__Basidiomycota_ord_Incertae_sedis	f__Basidiomycota_fam_Incertae_sedis	g__Basidiomycota_gen_Incertae_sedis	s__Basidiomycota_sp
OTU1016	SINGLETON | n=1	0	0	1	0	0	GU062229	SH0926075.10FU	5.47082e-101	370.977	410	1	254	308	561	237	237	93.3	98.4	258	k__Fungi	p__Basidiomycota	c__Basidiomycota_cls_Incertae_sedis	o__Basidiomycota_ord_Incertae_sedis	f__Basidiomycota_fam_Incertae_sedis	g__Basidiomycota_gen_Incertae_sedis	s__Basidiomycota_sp
OTU1017	SINGLETON | n=1	0	0	1	0	0	GU062229	SH0926075.10FU	9.88275e-117	423.275	468	1	254	308	561	246	246	96.9	98.4	258	k__Fungi	p__Basidiomycota	c__Basidiomycota_cls_Incertae_sedis	o__Basidiomycota_ord_Incertae_sedis	f__Basidiomycota_fam_Incertae_sedis	g__Basidiomycota_gen_Incertae_sedis	s__Basidiomycota_sp
OTU1018	SINGLETON | n=1	0	1	0	0	0	GU062229	SH0926075.10FU	7.63117e-112	407.044	450	1	255	308	561	244	244	95.7	98.5	259	k__Fungi	p__Basidiomycota	c__Basidiomycota_cls_Incertae_sedis	o__Basidiomycota_ord_Incertae_sedis	f__Basidiomycota_fam_Incertae_sedis	g__Basidiomycota_gen_Incertae_sedis	s__Basidiomycota_sp
OTU1019	SINGLETON | n=1	0	0	1	0	0	GU062229	SH0926075.10FU	1.06075e-103	379.994	420	1	255	308	561	238	238	93.3	98.5	259	k__Fungi	p__Basidiomycota	c__Basidiomycota_cls_Incertae_sedis	o__Basidiomycota_ord_Incertae_sedis	f__Basidiomycota_fam_Incertae_sedis	g__Basidiomycota_gen_Incertae_sedis	s__Basidiomycota_sp
OTU1020	SINGLETON | n=1	0	0	1	0	0	GU062229	SH0926075.10FU	3.46455e-116	421.471	466	1	255	308	561	247	247	96.9	98.5	259	k__Fungi	p__Basidiomycota	c__Basidiomycota_cls_Incertae_sedis	o__Basidiomycota_ord_Incertae_sedis	f__Basidiomycota_fam_Incertae_sedis	g__Basidiomycota_gen_Incertae_sedis	s__Basidiomycota_sp
OTU1021	SINGLETON | n=1	0	0	1	0	0	GU062229	SH0926075.10FU	2.84387e-117	425.078	470	1	255	308	561	248	248	97.3	98.5	259	k__Fungi	p__Basidiomycota	c__Basidiomycota_cls_Incertae_sedis	o__Basidiomycota_ord_Incertae_sedis	f__Basidiomycota_fam_Incertae_sedis	g__Basidiomycota_gen_Incertae_sedis	s__Basidiomycota_sp
OTU1022	SINGLETON | n=1	0	0	1	0	0	GU062229	SH0926075.10FU	2.84387e-117	425.078	470	1	255	308	561	248	248	97.3	98.5	259	k__Fungi	p__Basidiomycota	c__Basidiomycota_cls_Incertae_sedis	o__Basidiomycota_ord_Incertae_sedis	f__Basidiomycota_fam_Incertae_sedis	g__Basidiomycota_gen_Incertae_sedis	s__Basidiomycota_sp
OTU1023	SINGLETON | n=1	0	0	1	0	0	GU062229	SH0926075.10FU	1.47316e-114	416.061	460	1	255	308	561	246	246	96.5	98.5	259	k__Fungi	p__Basidiomycota	c__Basidiomycota_cls_Incertae_sedis	o__Basidiomycota_ord_Incertae_sedis	f__Basidiomycota_fam_Incertae_sedis	g__Basidiomycota_gen_Incertae_sedis	s__Basidiomycota_sp
OTU1024	SINGLETON | n=1	1	0	0	0	0	GU062229	SH0926075.10FU	3.95305e-109	398.027	440	1	255	308	561	242	242	94.9	98.5	259	k__Fungi	p__Basidiomycota	c__Basidiomycota_cls_Incertae_sedis	o__Basidiomycota_ord_Incertae_sedis	f__Basidiomycota_fam_Incertae_sedis	g__Basidiomycota_gen_Incertae_sedis	s__Basidiomycota_sp
OTU1025	SINGLETON | n=1	1	0	0	0	0	GU062229	SH0926075.10FU	2.84387e-117	425.078	470	1	255	308	561	248	248	97.3	98.5	259	k__Fungi	p__Basidiomycota	c__Basidiomycota_cls_Incertae_sedis	o__Basidiomycota_ord_Incertae_sedis	f__Basidiomycota_fam_Incertae_sedis	g__Basidiomycota_gen_Incertae_sedis	s__Basidiomycota_sp
OTU1026	SINGLETON | n=1	1	0	0	0	0	GU062229	SH0926075.10FU	7.63117e-112	407.044	450	1	255	308	561	244	244	95.7	98.5	259	k__Fungi	p__Basidiomycota	c__Basidiomycota_cls_Incertae_sedis	o__Basidiomycota_ord_Incertae_sedis	f__Basidiomycota_fam_Incertae_sedis	g__Basidiomycota_gen_Incertae_sedis	s__Basidiomycota_sp
OTU1027	SINGLETON | n=1	1	0	0	0	0	GU062229	SH0926075.10FU	2.84387e-117	425.078	470	1	255	308	561	248	248	97.3	98.5	259	k__Fungi	p__Basidiomycota	c__Basidiomycota_cls_Incertae_sedis	o__Basidiomycota_ord_Incertae_sedis	f__Basidiomycota_fam_Incertae_sedis	g__Basidiomycota_gen_Incertae_sedis	s__Basidiomycota_sp
OTU1028	SINGLETON | n=1	1	0	0	0	0	GU062229	SH0926075.10FU	2.84387e-117	425.078	470	1	255	308	561	248	248	97.3	98.5	259	k__Fungi	p__Basidiomycota	c__Basidiomycota_cls_Incertae_sedis	o__Basidiomycota_ord_Incertae_sedis	f__Basidiomycota_fam_Incertae_sedis	g__Basidiomycota_gen_Incertae_sedis	s__Basidiomycota_sp
OTU1029	SINGLETON | n=1	1	0	0	0	0	GU062229	SH0926075.10FU	9.29667e-111	403.438	446	1	255	308	561	243	243	95.3	98.5	259	k__Fungi	p__Basidiomycota	c__Basidiomycota_cls_Incertae_sedis	o__Basidiomycota_ord_Incertae_sedis	f__Basidiomycota_fam_Incertae_sedis	g__Basidiomycota_gen_Incertae_sedis	s__Basidiomycota_sp
OTU1030	SINGLETON | n=1	1	0	0	0	0	GU062229	SH0926075.10FU	1.47316e-114	416.061	460	1	255	308	561	246	246	96.5	98.5	259	k__Fungi	p__Basidiomycota	c__Basidiomycota_cls_Incertae_sedis	o__Basidiomycota_ord_Incertae_sedis	f__Basidiomycota_fam_Incertae_sedis	g__Basidiomycota_gen_Incertae_sedis	s__Basidiomycota_sp
OTU1031	SINGLETON | n=1	1	0	0	0	0	GU062229	SH0926075.10FU	2.49464e-105	385.404	426	1	255	308	561	239	239	93.7	98.5	259	k__Fungi	p__Basidiomycota	c__Basidiomycota_cls_Incertae_sedis	o__Basidiomycota_ord_Incertae_sedis	f__Basidiomycota_fam_Incertae_sedis	g__Basidiomycota_gen_Incertae_sedis	s__Basidiomycota_sp
OTU1032	SINGLETON | n=1	1	0	0	0	0	GU062229	SH0926075.10FU	1.47316e-114	416.061	460	1	255	308	561	246	246	96.5	98.5	259	k__Fungi	p__Basidiomycota	c__Basidiomycota_cls_Incertae_sedis	o__Basidiomycota_ord_Incertae_sedis	f__Basidiomycota_fam_Incertae_sedis	g__Basidiomycota_gen_Incertae_sedis	s__Basidiomycota_sp
OTU1033	SINGLETON | n=1	0	1	0	0	0	GU062229	SH0926075.10FU	2.04773e-106	389.011	430	1	255	308	561	240	240	94.1	98.5	259	k__Fungi	p__Basidiomycota	c__Basidiomycota_cls_Incertae_sedis	o__Basidiomycota_ord_Incertae_sedis	f__Basidiomycota_fam_Incertae_sedis	g__Basidiomycota_gen_Incertae_sedis	s__Basidiomycota_sp
OTU1034	SINGLETON | n=1	0	1	0	0	0	GU062229	SH0926075.10FU	4.8158e-108	394.421	436	1	255	308	561	241	241	94.5	98.5	259	k__Fungi	p__Basidiomycota	c__Basidiomycota_cls_Incertae_sedis	o__Basidiomycota_ord_Incertae_sedis	f__Basidiomycota_fam_Incertae_sedis	g__Basidiomycota_gen_Incertae_sedis	s__Basidiomycota_sp
OTU1035	SINGLETON | n=1	0	0	1	0	0	GU062229	SH0926075.10FU	3.46455e-116	421.471	466	1	255	308	561	247	247	96.9	98.5	259	k__Fungi	p__Basidiomycota	c__Basidiomycota_cls_Incertae_sedis	o__Basidiomycota_ord_Incertae_sedis	f__Basidiomycota_fam_Incertae_sedis	g__Basidiomycota_gen_Incertae_sedis	s__Basidiomycota_sp
OTU1036	SINGLETON | n=1	0	0	1	0	0	GU062229	SH0926075.10FU	2.84387e-117	425.078	470	1	255	308	561	248	248	97.3	98.5	259	k__Fungi	p__Basidiomycota	c__Basidiomycota_cls_Incertae_sedis	o__Basidiomycota_ord_Incertae_sedis	f__Basidiomycota_fam_Incertae_sedis	g__Basidiomycota_gen_Incertae_sedis	s__Basidiomycota_sp
OTU1037	SINGLETON | n=1	0	1	0	0	0	GU062229	SH0926075.10FU	2.84387e-117	425.078	470	1	255	308	561	248	248	97.3	98.5	259	k__Fungi	p__Basidiomycota	c__Basidiomycota_cls_Incertae_sedis	o__Basidiomycota_ord_Incertae_sedis	f__Basidiomycota_fam_Incertae_sedis	g__Basidiomycota_gen_Incertae_sedis	s__Basidiomycota_sp
OTU1038	SINGLETON | n=1	0	0	1	0	0	GU062229	SH0926075.10FU	9.29667e-111	403.438	446	1	255	308	561	243	243	95.3	98.5	259	k__Fungi	p__Basidiomycota	c__Basidiomycota_cls_Incertae_sedis	o__Basidiomycota_ord_Incertae_sedis	f__Basidiomycota_fam_Incertae_sedis	g__Basidiomycota_gen_Incertae_sedis	s__Basidiomycota_sp
OTU1039	SINGLETON | n=1	0	1	0	0	0	GU062229	SH0926075.10FU	7.63117e-112	407.044	450	1	255	308	561	244	244	95.7	98.5	259	k__Fungi	p__Basidiomycota	c__Basidiomycota_cls_Incertae_sedis	o__Basidiomycota_ord_Incertae_sedis	f__Basidiomycota_fam_Incertae_sedis	g__Basidiomycota_gen_Incertae_sedis	s__Basidiomycota_sp
OTU1040	SINGLETON | n=1	0	1	0	0	0	GU062229	SH0926075.10FU	9.29667e-111	403.438	446	1	253	308	559	242	242	95.7	97.7	259	k__Fungi	p__Basidiomycota	c__Basidiomycota_cls_Incertae_sedis	o__Basidiomycota_ord_Incertae_sedis	f__Basidiomycota_fam_Incertae_sedis	g__Basidiomycota_gen_Incertae_sedis	s__Basidiomycota_sp
OTU1041	SINGLETON | n=1	0	1	0	0	0	GU062229	SH0926075.10FU	3.46455e-116	421.471	466	1	255	308	561	247	247	96.9	98.5	259	k__Fungi	p__Basidiomycota	c__Basidiomycota_cls_Incertae_sedis	o__Basidiomycota_ord_Incertae_sedis	f__Basidiomycota_fam_Incertae_sedis	g__Basidiomycota_gen_Incertae_sedis	s__Basidiomycota_sp
OTU1042	SINGLETON | n=1	0	1	0	0	0	GU062229	SH0926075.10FU	1.47316e-114	416.061	460	1	255	308	561	246	246	96.5	98.5	259	k__Fungi	p__Basidiomycota	c__Basidiomycota_cls_Incertae_sedis	o__Basidiomycota_ord_Incertae_sedis	f__Basidiomycota_fam_Incertae_sedis	g__Basidiomycota_gen_Incertae_sedis	s__Basidiomycota_sp
OTU1043	SINGLETON | n=1	0	1	0	0	0	GU062229	SH0926075.10FU	2.84387e-117	425.078	470	1	255	308	561	248	248	97.3	98.5	259	k__Fungi	p__Basidiomycota	c__Basidiomycota_cls_Incertae_sedis	o__Basidiomycota_ord_Incertae_sedis	f__Basidiomycota_fam_Incertae_sedis	g__Basidiomycota_gen_Incertae_sedis	s__Basidiomycota_sp
OTU1044	SINGLETON | n=1	0	1	0	0	0	GU062229	SH0926075.10FU	2.84387e-117	425.078	470	1	255	308	561	248	248	97.3	98.5	259	k__Fungi	p__Basidiomycota	c__Basidiomycota_cls_Incertae_sedis	o__Basidiomycota_ord_Incertae_sedis	f__Basidiomycota_fam_Incertae_sedis	g__Basidiomycota_gen_Incertae_sedis	s__Basidiomycota_sp
OTU1045	SINGLETON | n=1	1	0	0	0	0	GU062229	SH0926075.10FU	1.79468e-113	412.454	456	1	255	308	561	245	245	96.1	98.5	259	k__Fungi	p__Basidiomycota	c__Basidiomycota_cls_Incertae_sedis	o__Basidiomycota_ord_Incertae_sedis	f__Basidiomycota_fam_Incertae_sedis	g__Basidiomycota_gen_Incertae_sedis	s__Basidiomycota_sp
OTU1046	SINGLETON | n=1	1	0	0	0	0	GU062229	SH0926075.10FU	1.79468e-113	412.454	456	1	255	308	561	245	245	96.1	98.5	259	k__Fungi	p__Basidiomycota	c__Basidiomycota_cls_Incertae_sedis	o__Basidiomycota_ord_Incertae_sedis	f__Basidiomycota_fam_Incertae_sedis	g__Basidiomycota_gen_Incertae_sedis	s__Basidiomycota_sp
OTU1047	SINGLETON | n=1	1	0	0	0	0	GU062229	SH0926075.10FU	1.79468e-113	412.454	456	1	255	308	561	245	245	96.1	98.5	259	k__Fungi	p__Basidiomycota	c__Basidiomycota_cls_Incertae_sedis	o__Basidiomycota_ord_Incertae_sedis	f__Basidiomycota_fam_Incertae_sedis	g__Basidiomycota_gen_Incertae_sedis	s__Basidiomycota_sp
OTU1048	SINGLETON | n=1	0	0	1	0	0	GU062229	SH0926075.10FU	3.46455e-116	421.471	466	1	255	308	561	247	247	96.9	98.5	259	k__Fungi	p__Basidiomycota	c__Basidiomycota_cls_Incertae_sedis	o__Basidiomycota_ord_Incertae_sedis	f__Basidiomycota_fam_Incertae_sedis	g__Basidiomycota_gen_Incertae_sedis	s__Basidiomycota_sp
OTU1049	SINGLETON | n=1	1	0	0	0	0	GU062229	SH0926075.10FU	3.46455e-116	421.471	466	1	255	308	561	247	247	96.9	98.5	259	k__Fungi	p__Basidiomycota	c__Basidiomycota_cls_Incertae_sedis	o__Basidiomycota_ord_Incertae_sedis	f__Basidiomycota_fam_Incertae_sedis	g__Basidiomycota_gen_Incertae_sedis	s__Basidiomycota_sp
OTU1050	SINGLETON | n=1	0	0	1	0	0	GU062229	SH0926075.10FU	9.29667e-111	403.438	446	1	255	308	561	243	243	95.3	98.5	259	k__Fungi	p__Basidiomycota	c__Basidiomycota_cls_Incertae_sedis	o__Basidiomycota_ord_Incertae_sedis	f__Basidiomycota_fam_Incertae_sedis	g__Basidiomycota_gen_Incertae_sedis	s__Basidiomycota_sp
OTU1051	SINGLETON | n=1	0	0	1	0	0	GU062229	SH0926075.10FU	9.29667e-111	403.438	446	1	255	308	561	243	243	95.3	98.5	259	k__Fungi	p__Basidiomycota	c__Basidiomycota_cls_Incertae_sedis	o__Basidiomycota_ord_Incertae_sedis	f__Basidiomycota_fam_Incertae_sedis	g__Basidiomycota_gen_Incertae_sedis	s__Basidiomycota_sp
OTU1052	SINGLETON | n=1	0	0	1	0	0	GU062229	SH0926075.10FU	1.47316e-114	416.061	460	1	255	308	561	246	246	96.5	98.5	259	k__Fungi	p__Basidiomycota	c__Basidiomycota_cls_Incertae_sedis	o__Basidiomycota_ord_Incertae_sedis	f__Basidiomycota_fam_Incertae_sedis	g__Basidiomycota_gen_Incertae_sedis	s__Basidiomycota_sp
OTU1053	SINGLETON | n=1	0	0	1	0	0	GU062229	SH0926075.10FU	2.84387e-117	425.078	470	1	255	308	561	248	248	97.3	98.5	259	k__Fungi	p__Basidiomycota	c__Basidiomycota_cls_Incertae_sedis	o__Basidiomycota_ord_Incertae_sedis	f__Basidiomycota_fam_Incertae_sedis	g__Basidiomycota_gen_Incertae_sedis	s__Basidiomycota_sp
OTU1054	SINGLETON | n=1	0	1	0	0	0	GU062229	SH0926075.10FU	1.47316e-114	416.061	460	1	255	308	561	246	246	96.5	98.5	259	k__Fungi	p__Basidiomycota	c__Basidiomycota_cls_Incertae_sedis	o__Basidiomycota_ord_Incertae_sedis	f__Basidiomycota_fam_Incertae_sedis	g__Basidiomycota_gen_Incertae_sedis	s__Basidiomycota_sp
OTU1055	SINGLETON | n=1	0	0	1	0	0	GU062229	SH0926075.10FU	9.29667e-111	403.438	446	1	255	308	561	243	243	95.3	98.5	259	k__Fungi	p__Basidiomycota	c__Basidiomycota_cls_Incertae_sedis	o__Basidiomycota_ord_Incertae_sedis	f__Basidiomycota_fam_Incertae_sedis	g__Basidiomycota_gen_Incertae_sedis	s__Basidiomycota_sp
OTU1056	SINGLETON | n=1	0	1	0	0	0	GU062229	SH0926075.10FU	4.53012e-102	374.584	414	1	256	308	561	237	237	92.6	98.5	260	k__Fungi	p__Basidiomycota	c__Basidiomycota_cls_Incertae_sedis	o__Basidiomycota_ord_Incertae_sedis	f__Basidiomycota_fam_Incertae_sedis	g__Basidiomycota_gen_Incertae_sedis	s__Basidiomycota_sp
OTU1057	SINGLETON | n=1	1	0	0	0	0	GU062229	SH0926075.10FU	1.68822e-107	392.617	434	1	256	308	561	241	241	94.1	98.5	260	k__Fungi	p__Basidiomycota	c__Basidiomycota_cls_Incertae_sedis	o__Basidiomycota_ord_Incertae_sedis	f__Basidiomycota_fam_Incertae_sedis	g__Basidiomycota_gen_Incertae_sedis	s__Basidiomycota_sp
OTU1058	SINGLETON | n=1	0	1	0	0	0	OP470296	SH0937368.10FU	5.15992e-066	253.758	280	1	140	310	449	140	140	100	100	140	k__Fungi	p__Basidiomycota	c__Tremellomycetes	o__Tremellales	f__Bulleribasidiaceae	g__Vishniacozyma	s__Vishniacozyma_sp
OTU1059	SINGLETON | n=1	1	0	0	0	0	GU062229	SH0926075.10FU	7.17849e-106	387.207	428	1	256	308	561	240	240	93.8	98.5	260	k__Fungi	p__Basidiomycota	c__Basidiomycota_cls_Incertae_sedis	o__Basidiomycota_ord_Incertae_sedis	f__Basidiomycota_fam_Incertae_sedis	g__Basidiomycota_gen_Incertae_sedis	s__Basidiomycota_sp
OTU1060	SINGLETON | n=1	0	0	1	0	0	GU062229	SH0926075.10FU	9.96944e-117	423.275	468	1	256	308	561	248	248	96.9	98.5	260	k__Fungi	p__Basidiomycota	c__Basidiomycota_cls_Incertae_sedis	o__Basidiomycota_ord_Incertae_sedis	f__Basidiomycota_fam_Incertae_sedis	g__Basidiomycota_gen_Incertae_sedis	s__Basidiomycota_sp
OTU1061	SINGLETON | n=1	0	1	0	0	0	GU062229	SH0926075.10FU	1.92626e-100	369.174	408	1	256	308	561	236	236	92.2	98.5	260	k__Fungi	p__Basidiomycota	c__Basidiomycota_cls_Incertae_sedis	o__Basidiomycota_ord_Incertae_sedis	f__Basidiomycota_fam_Incertae_sedis	g__Basidiomycota_gen_Incertae_sedis	s__Basidiomycota_sp
OTU1062	SINGLETON | n=1	0	0	1	0	0	GU062229	SH0926075.10FU	4.53012e-102	374.584	414	1	256	308	561	237	237	92.6	98.5	260	k__Fungi	p__Basidiomycota	c__Basidiomycota_cls_Incertae_sedis	o__Basidiomycota_ord_Incertae_sedis	f__Basidiomycota_fam_Incertae_sedis	g__Basidiomycota_gen_Incertae_sedis	s__Basidiomycota_sp
OTU1063	SINGLETON | n=1	0	0	1	0	0	LC646545	SH0946018.10FU	1.3846e-060	235.724	260	1	135	344	478	133	133	98.5	96.4	140	k__Fungi	p__Ascomycota	c__Leotiomycetes	o__Helotiales	f__Amorphothecaceae	g__Amorphotheca	s__Amorphotheca_resinae
OTU1064	SINGLETON | n=1	0	0	0	1	0	UDB05114141	SH1000510.10FU	7.58901e-064	246.544	272	1	139	304	442	138	138	99.3	100	139	k__Fungi	p__Ascomycota	c__Dothideomycetes	o__Mycosphaerellales	f__Teratosphaeriaceae	g__Devriesia	s__Devriesia_sp
OTU1065	SINGLETON | n=1	0	0	0	0	1	UDB01476870	SH0988768.10FU	1.95976e-100	369.174	408	1	236	457	691	224	224	94.9	89.4	264	k__Fungi	p__Mucoromycota	c__Mucoromycetes	o__Mucorales	f__Backusellaceae	g__Backusella	s__Backusella_sp
OTU1066	SINGLETON | n=1	1	0	0	0	0
OTU1067	SINGLETON | n=1	0	0	1	0	0
OTU1068	SINGLETON | n=1	0	0	0	1	0	UDB05343796	SH1044538.10FU	1.98558e-051	205.067	226	1	123	346	470	121	121	98.4	100	123	k__Fungi	p__Rozellomycota	c__Rozellomycota_cls_Incertae_sedis	o__Rozellomycota_ord_Incertae_sedis	f__Rozellomycota_fam_Incertae_sedis	g__Rozellomycota_gen_Incertae_sedis	s__Rozellomycota_sp
OTU1069	SINGLETON | n=1	0	0	0	0	1	JQ768939	SH0732420.10FU	1.8201e-045	185.23	204	1	118	291	411	116	116	98.3	97.5	121	k__Fungi	p__Basidiomycota	c__Tremellomycetes	o__Tremellales	f__Bulleribasidiaceae	g__Dioszegia	s__Dioszegia_sp
OTU1070	SINGLETON | n=1	0	0	1	0	0	UDB01377483	SH1043674.10FU	2.98428e-017	91.4547	100	4	98	265	366	84	84	88.4	80.5	118	k__Fungi	p__Ascomycota	c__Ascomycota_cls_Incertae_sedis	o__Ascomycota_ord_Incertae_sedis	f__Ascomycota_fam_Incertae_sedis	g__Ascomycota_gen_Incertae_sedis	s__Ascomycota_sp
OTU1071	SINGLETON | n=1	1	0	0	0	0	UDB01377483	SH1043674.10FU	4.42906e-015	84.2413	92	4	99	265	367	83	83	86.5	81.4	118	k__Fungi	p__Ascomycota	c__Ascomycota_cls_Incertae_sedis	o__Ascomycota_ord_Incertae_sedis	f__Ascomycota_fam_Incertae_sedis	g__Ascomycota_gen_Incertae_sedis	s__Ascomycota_sp
OTU1072	SINGLETON | n=1	0	0	0	0	1	MH971276	SH0756837.10FU	1.82929e-088	329.499	364	32	279	450	681	223	223	89.9	88.9	279	k__Fungi	p__Mucoromycota	c__Mucoromycetes	o__Mucorales	f__Mucoraceae	g__Mucoraceae_gen_Incertae_sedis	s__Mucoraceae_sp
OTU1073	SINGLETON | n=1	0	0	1	0	0	UDB01377483	SH1043674.10FU	8.5501e-018	93.2581	102	4	99	265	367	85	85	88.5	81.4	118	k__Fungi	p__Ascomycota	c__Ascomycota_cls_Incertae_sedis	o__Ascomycota_ord_Incertae_sedis	f__Ascomycota_fam_Incertae_sedis	g__Ascomycota_gen_Incertae_sedis	s__Ascomycota_sp
OTU1074	SINGLETON | n=1	1	0	0	0	0
OTU1075	SINGLETON | n=1	0	0	0	1	0	UDB04949573	SH0896671.10FU	7.91355e-144	513.443	568	1	284	319	602	284	284	100	100	284	k__Fungi	p__Mortierellomycota	c__Mortierellomycetes	o__Mortierellales	f__Mortierellales_fam_Incertae_sedis	g__Mortierellales_gen_Incertae_sedis	s__Mortierellales_sp
OTU1076	SINGLETON | n=1	0	0	0	1	0	OR568456	SH0961212.10FU	1.25248e-053	212.28	234	1	117	298	414	117	117	100	100	117	k__Fungi	p__Ascomycota	c__Leotiomycetes	o__Chaetomellales	f__Chaetomellaceae	g__Pilidium	s__Pilidium_concavum
OTU1077	SINGLETON | n=1	0	0	0	0	1	KY322652	SH0965693.10FU	1.95265e-076	289.825	320	1	178	446	623	171	171	96.1	53.5	333	k__Fungi	p__Fungi_phy_Incertae_sedis	c__Fungi_cls_Incertae_sedis	o__Fungi_ord_Incertae_sedis	f__Fungi_fam_Incertae_sedis	g__Fungi_gen_Incertae_sedis	s__Fungi_sp
OTU1078	SINGLETON | n=1	0	0	0	1	0	UDB02425502	SH0859910.10FU	2.39179e-170	601.808	666	1	336	253	588	335	335	99.7	100	336	k__Fungi	p__Olpidiomycota	c__GS18	o__GS18_ord_Incertae_sedis	f__GS18_fam_Incertae_sedis	g__GS18_gen_Incertae_sedis	s__GS18_sp
OTU1079	SINGLETON | n=1	0	0	0	0	1	UDB04355438	SH0819112.10FU	5.1441e-052	206.87	228	1	114	284	397	114	114	100	100	114	k__Fungi	p__Ascomycota	c__Pezizomycotina_cls_Incertae_sedis	o__Pezizomycotina_ord_Incertae_sedis	f__Pezizomycotina_fam_Incertae_sedis	g__Pezizomycotina_gen_Incertae_sedis	s__Pezizomycotina_sp
