# Supplementary material for: Extremotolerant Fungi in Resinous Soils: A Unique Diversity of Generalist and Specialized Hydrocarbon Degraders
Source: Research Square preprint supplement (doi:10.21203/rs.3.rs-8530099/v1), 2026-02-10
Supplement: Supplementary file 2 [file 4ea22d90684b352a3c1a2ed8.xlsx]

## Sheet: Table_S2
OTUs	Type|Abund	RS1.I	RS1.II	RS1.III	Accession Number	SH	E value	Max score	Total score	Query from	Query to	Hit from	Hit to	Identity	Positive	Similarity[%]	Coverage[%]	Query length	kingdom	phylum	class	order	family	genus	species
OTU001	MOSTABUND|n=13426/7389	4441	4187	4798	MT872624	SH0912804.10FU	7.73175e-044	180.245	97	1	150	578	729	134	134	89.3	100	150	k__Fungi	p__Ascomycota	c__Eurotiomycetes	o__Eurotiomycetes_ord_Incertae_sedis	f__Eurotiomycetes_fam_Incertae_sedis	g__Eurotiomycetes_gen_Incertae_sedis	s__Eurotiomycetes_sp
OTU002	MOSTABUND|n=7019/3534	1934	2091	2994	PP115452	SH0911881.10FU	3.83567e-108	394.457	213	1	213	308	520	213	213	100	100	213	k__Fungi	p__Basidiomycota	c__Microbotryomycetes	o__Sporidiobolales	f__Sporidiobolaceae	g__Sporobolomyces	s__Sporobolomyces_salmonicolor
OTU003	MOSTABUND|n=4199/2311	1194	1945	1060	EU030275	SH0828639.10FU	8.19364e-074	279.964	151	1	160	334	493	157	157	98.1	98.2	163	k__Fungi	p__Ascomycota	c__Eurotiomycetes	o__Chaetothyriales	f__Herpotrichiellaceae	g__Sorocybe	s__Sorocybe_resinae
OTU004	MOSTABUND|n=3052/1354	1270	808	974	MN071391	SH1043354.10FU	3.99291e-113	411.077	222	1	222	297	518	222	222	100	100	222	k__Fungi	p__Fungi_phy_Incertae_sedis	c__Fungi_cls_Incertae_sedis	o__Fungi_ord_Incertae_sedis	f__Fungi_fam_Incertae_sedis	g__Fungi_gen_Incertae_sedis	s__Fungi_sp
OTU005	MOSTABUND|n=2481/1146	978	664	839	MW710094	SH0733979.10FU	2.52731e-120	435.083	235	1	235	324	558	235	235	100	100	235	k__Fungi	p__Basidiomycota	c__Microbotryomycetes	o__Microbotryomycetes_ord_Incertae_sedis	f__Colacogloeaceae	g__Colacogloea	s__Colacogloea_philyla
OTU006	MOSTABUND|n=2328/1279	556	198	1574	FJ235127	SH0892767.10FU	1.25628e-097	359.37	194	1	194	407	600	194	194	100	100	194	k__Fungi	p__Ascomycota	c__Saccharomycetes	o__Saccharomycetales	f__Saccharomycetales_fam_Incertae_sedis	g__Candida	s__Candida_keroseneae
OTU007	MOSTABUND|n=2172/685	768	676	728	MH188916	SH0926074.10FU	4.26975e-118	427.696	231	1	237	347	584	236	236	99.6	100	237	k__Fungi	p__Basidiomycota	c__Exobasidiomycetes	o__Exobasidiales	f__Exobasidiales_fam_Incertae_sedis	g__Guomyces	s__Guomyces_nicotianae
OTU008	MOSTABUND|n=1980/1016	587	576	817	OR069551	SH0767731.10FU	1.74869e-080	302.124	163	1	163	331	493	163	163	100	100	163	k__Fungi	p__Ascomycota	c__Eurotiomycetes	o__Eurotiales	f__Aspergillaceae	g__Penicillium	s__Penicillium_corylophilum
OTU009	MOSTABUND|n=1846/1020	644	535	667	OR905858	SH0887078.10FU	4.49133e-097	357.524	193	1	193	394	586	193	193	100	100	193	k__Fungi	p__Ascomycota	c__Saccharomycetes	o__Saccharomycetales	f__Debaryomycetaceae	g__Debaryomyces	s__Debaryomyces_hansenii
OTU010	MOSTABUND|n=1553/773	514	450	589	MT813950	SH0950131.10FU	4.78626e-071	270.731	146	1	156	217	371	153	153	98.1	98.1	159	k__Fungi	p__Ascomycota	c__Xylonomycetes	o__Symbiotaphrinales	f__Symbiotaphrinaceae	g__Symbiotaphrina	s__Symbiotaphrina_microtheca
OTU011	MOSTABUND|n=1046/432	334	310	402	MT872624	SH0912804.10FU	4.53245e-071	270.731	146	1	152	578	729	150	150	98.7	100	152	k__Fungi	p__Ascomycota	c__Eurotiomycetes	o__Eurotiomycetes_ord_Incertae_sedis	f__Eurotiomycetes_fam_Incertae_sedis	g__Eurotiomycetes_gen_Incertae_sedis	s__Eurotiomycetes_sp
OTU012	MOSTABUND|n=1045/161	373	370	302	GU062229	SH0926075.10FU	7.69423e-131	470.169	254	1	254	308	561	254	254	100	98.4	258	k__Fungi	p__Basidiomycota	c__Basidiomycota_cls_Incertae_sedis	o__Basidiomycota_ord_Incertae_sedis	f__Basidiomycota_fam_Incertae_sedis	g__Basidiomycota_gen_Incertae_sedis	s__Basidiomycota_sp
OTU013	MOSTABUND|n=1041/338	395	227	419	UDB03608770	SH1012176.10FU	5.48785e-070	267.038	144	1	144	317	460	144	144	100	100	144	k__Fungi	p__Ascomycota	c__Leotiomycetes	o__Helotiales	f__Helotiales_fam_Incertae_sedis	g__Infundichalara	s__Infundichalara_sp
OTU014	MOSTABUND|n=1033/555	222	500	311															k_	p_	c_	o_	f_	g_	s_
OTU015	MOSTABUND|n=901/171	316	279	306	OR387067	SH0974819.10FU	3.0608e-109	398.15	215	1	219	363	580	218	218	99.5	100	219	k__Fungi	p__Ascomycota	c__Eurotiomycetes	o__Chaetothyriales	f__Herpotrichiellaceae	g__Exophiala	s__Exophiala_dermatitidis
OTU016	MOSTABUND|n=846/392	317	265	264	KT265804	SH0733984.10FU	1.95814e-116	422.156	228	1	232	883	1113	231	231	99.6	99.1	234	k__Fungi	p__Basidiomycota	c__Microbotryomycetes	o__Sporidiobolales	f__Sporidiobolaceae	g__Rhodotorula	s__Rhodotorula_sp
OTU017	MOSTABUND|n=717/324	290	193	234	OR793058	SH0767731.10FU	7.95641e-079	296.584	160	1	160	362	521	160	160	100	100	160	k__Fungi	p__Ascomycota	c__Eurotiomycetes	o__Eurotiales	f__Aspergillaceae	g__Penicillium	s__Penicillium_fundyense
OTU018	MOSTABUND|n=534/308	192	135	207	OQ383503	SH0966706.10FU	9.50805e-073	276.271	149	1	149	312	460	149	149	100	100	149	k__Fungi	p__Ascomycota	c__Leotiomycetes	o__Leotiales	f__Tympanidaceae	g__Pragmopora	s__Pragmopora_sp
OTU019	MOSTABUND|n=400/136	231	83	86	OM337540	SH0924980.10FU	2.77361e-073	278.118	150	1	153	470	622	152	152	99.3	98.7	155	k__Fungi	p__Ascomycota	c__Dothideomycetes	o__Mytilinidiales	f__Mytilinidiaceae	g__Lophium	s__Lophium_mytilinum
OTU020	MOSTABUND|n=352/213	210	77	65	OM980413	SH0862656.10FU	4.60542e-017	91.6061	49	36	137	382	485	88	88	86.3	57	179	k__Fungi	p__Basidiomycota	c__Microbotryomycetes	o__Microbotryomycetes_ord_Incertae_sedis	f__Microbotryomycetes_fam_Incertae_sedis	g__Yunzhangia	s__Yunzhangia_sp
OTU021	MOSTABUND|n=335/207	107	122	106	OM337573	SH0849718.10FU	1.77406e-075	285.504	154	1	164	538	700	161	161	98.2	100	164	k__Fungi	p__Ascomycota	c__Dothideomycetes	o__Mytilinidiales	f__Mytilinidiaceae	g__Mytilinidion	s__Mytilinidion_resinicola
OTU022	MOSTABUND|n=318/182	124	78	116	MK782435	SH0905449.10FU	1.3717e-081	305.817	165	1	165	771	935	165	165	100	100	165	k__Fungi	p__Ascomycota	c__Leotiomycetes	o__Helotiales	f__Mollisiaceae	g__Phialocephala	s__Phialocephala_fluminis
OTU023	MOSTABUND|n=300/202	102	78	120	EF434047	SH0868844.10FU	1.05174e-067	259.651	140	1	161	433	593	154	154	95.7	100	161	k__Fungi	p__Ascomycota	c__Dothideomycetes	o__Dothideomycetes_ord_Incertae_sedis	f__Dothideomycetes_fam_Incertae_sedis	g__Dothideomycetes_gen_Incertae_sedis	s__Dothideomycetes_sp
OTU024	MOSTABUND|n=296/97	72	54	170	MT809296	SH0737869.10FU	2.09388e-074	281.811	152	1	152	352	503	152	152	100	100	152	k__Fungi	p__Ascomycota	c__Sareomycetes	o__Sareales	f__Sareaceae	g__Sarea	s__Sarea_sp
OTU025	MOSTABUND|n=271/149	20	19	232	OP856539	SH0970687.10FU	3.60778e-058	228.258	123	1	173	361	535	158	158	91.3	91.1	190	k__Fungi	p__Ascomycota	c__Sordariomycetes	o__Microascales	f__Microascaceae	g__Scedosporium	s__Scedosporium_sp
OTU026	MOSTABUND|n=211/90	138	20	53	OR752067	SH0940075.10FU	1.3717e-081	305.817	165	1	165	364	528	165	165	100	100	165	k__Fungi	p__Ascomycota	c__Eurotiomycetes	o__Eurotiales	f__Aspergillaceae	g__Aspergillus	s__Aspergillus_fumigatus
OTU027	MOSTABUND|n=183/81	98	36	49	OQ718080	SH0738016.10FU	1.27027e-071	272.578	147	1	153	373	525	151	151	98.7	100	153	k__Fungi	p__Ascomycota	c__Sareomycetes	o__Sareales	f__Sareaceae	g__Sarea	s__Sarea_coeloplata
OTU028	MOSTABUND|n=167/81	43	87	37	LC272919	SH0915560.10FU	1.76057e-070	268.884	145	1	162	362	525	158	158	97.5	100	162	k__Fungi	p__Ascomycota	c__Dothideomycetes	o__Myriangiales	f__Myriangiales_fam_Incertae_sedis	g__Myriangiales_gen_Incertae_sedis	s__Myriangiales_sp
OTU029	MOSTABUND|n=161/89	55	74	32	KY105956	SH0892770.10FU	4.27798e-092	340.904	184	1	184	467	650	184	184	100	100	184	k__Fungi	p__Ascomycota	c__Saccharomycetes	o__Saccharomycetales	f__Debaryomycetaceae	g__Yamadazyma	s__Yamadazyma_tumulicola
OTU030	MOSTABUND|n=157/91	51	54	52	UDB02025080	SH0950063.10FU	3.25834e-052	207.945	112	1	130	309	439	125	125	96.2	92.9	140	k__Fungi	p__Ascomycota	c__Dothideomycetes	o__Mycosphaerellales	f__Neodevriesiaceae	g__Neodevriesiaceae_gen_Incertae_sedis	s__Neodevriesiaceae_sp
OTU031	MOSTABUND|n=154/81	51	49	54	UDB01441599	SH0878054.10FU	1.07576e-082	309.511	167	1	167	343	509	167	167	100	100	167	k__Fungi	p__Ascomycota	c__Eurotiomycetes	o__Eurotiales	f__Aspergillaceae	g__Aspergillus	s__Aspergillus_sp
OTU032	MOSTABUND|n=146/57	63	37	46	KU580845	SH1015287.10FU	2.55325e-068	261.498	141	1	144	358	502	144	144	100	100	144	k__Fungi	p__Fungi_phy_Incertae_sedis	c__Fungi_cls_Incertae_sedis	o__Fungi_ord_Incertae_sedis	f__Fungi_fam_Incertae_sedis	g__Fungi_gen_Incertae_sedis	s__Fungi_sp
OTU033	MOSTABUND|n=140/76	35	45	60	LC646545	SH0946018.10FU	8.86916e-068	259.651	140	1	140	344	483	140	140	100	100	140	k__Fungi	p__Ascomycota	c__Leotiomycetes	o__Helotiales	f__Amorphothecaceae	g__Amorphotheca	s__Amorphotheca_resinae
OTU034	MOSTABUND|n=139/70	45	45	49															k_	p_	c_	o_	f_	g_	s_
OTU035	MOSTABUND|n=132/63	46	29	57	LC639279	SH0946103.10FU	8.86916e-068	259.651	140	1	140	370	509	140	140	100	100	140	k__Fungi	p__Ascomycota	c__Leotiomycetes	o__Helotiales	f__Myxotrichaceae	g__Oidiodendron	s__Oidiodendron_griseum
OTU036	MOSTABUND|n=121/66	45	28	48	HG937089	SH0964646.10FU	1.36369e-092	342.75	185	1	207	363	567	200	200	96.6	100	207	k__Fungi	p__Basidiomycota	c__Basidiomycota_cls_Incertae_sedis	o__Basidiomycota_ord_Incertae_sedis	f__Basidiomycota_fam_Incertae_sedis	g__Basidiomycota_gen_Incertae_sedis	s__Basidiomycota_sp
OTU037	MOSTABUND|n=120/43	42	30	48	UDB01965427	SH0904668.10FU	9.33834e-074	279.964	151	1	182	350	530	173	173	95.1	100	182	k__Fungi	p__Ascomycota	c__Eurotiomycetes	o__Chaetothyriales	f__Herpotrichiellaceae	g__Exophiala	s__Exophiala_sp
OTU038	MOSTABUND|n=109/58	44	23	42	MZ314474	SH0743871.10FU	2.84012e-078	294.738	159	1	159	256	414	159	159	100	100	159	k__Fungi	p__Basidiomycota	c__Tremellomycetes	o__Tremellales	f__Naemateliaceae	g__Naematelia	s__Naematelia_encephala
OTU039	MOSTABUND|n=99/31	35	26	38	PP034030	SH0940222.10FU	1.07576e-082	309.511	167	1	167	250	416	167	167	100	100	167	k__Fungi	p__Ascomycota	c__Eurotiomycetes	o__Eurotiales	f__Aspergillaceae	g__Penicillium	s__Penicillium_roseopurpureum
OTU040	MOSTABUND|n=95/55	34	31	30	MH864711	SH0821638.10FU	2.09388e-074	281.811	152	1	152	414	565	152	152	100	100	152	k__Fungi	p__Ascomycota	c__Dothideomycetes	o__Pleosporales	f__Phaeosphaeriaceae	g__Paraphoma	s__Paraphoma_fimeti
OTU041	MOSTABUND|n=93/3	36	18	39	UDB07674985	SH1012176.10FU	1.18791e-066	255.958	138	1	144	315	458	142	142	98.6	100	144	k__Fungi	p__Ascomycota	c__Leotiomycetes	o__Helotiales	f__Pezizellaceae	g__Ciliolarina	s__Ciliolarina_sp
OTU042	MOSTABUND|n=87/37	35	22	30	KC785575	SH0934675.10FU	2.87382e-104	381.53	206	1	206	348	553	206	206	100	100	206	k__Fungi	p__Basidiomycota	c__Exobasidiomycetes	o__Exobasidiales	f__Exobasidiaceae	g__Exobasidiaceae_gen_Incertae_sedis	s__Exobasidiaceae_sp
OTU043	MOSTABUND|n=75/44	29	20	26															k_	p_	c_	o_	f_	g_	s_
OTU044	MOSTABUND|n=73/15	13	18	42	UDB05269281	SH0868848.10FU	1.40152e-081	305.817	165	1	168	393	560	167	167	99.4	100	168	k__Fungi	p__Ascomycota	c__Dothideomycetes	o__Dothideomycetes_ord_Incertae_sedis	f__Dothideomycetes_fam_Incertae_sedis	g__Dothideomycetes_gen_Incertae_sedis	s__Dothideomycetes_sp
OTU045	MOSTABUND|n=71/20	25	21	25	MH864788	SH0885672.10FU	6.97619e-090	333.517	180	1	180	357	536	180	180	100	100	180	k__Fungi	p__Ascomycota	c__Eurotiomycetes	o__Chaetothyriales	f__Herpotrichiellaceae	g__Rhinocladiella	s__Rhinocladiella_atrovirens
OTU046	MOSTABUND|n=64/36	25	17	22	OR091314	SH0801460.10FU	2.22881e-079	298.431	161	1	161	347	507	161	161	100	100	161	k__Fungi	p__Ascomycota	c__Eurotiomycetes	o__Phaeomoniellales	f__Celotheliaceae	g__Phaeomoniella	s__Phaeomoniella_sp
OTU047	MOSTABUND|n=64/21	22	18	24	OU953798	SH1012135.10FU	1.53887e-070	268.884	145	1	145	317	461	145	145	100	100	145	k__Fungi	p__Ascomycota	c__Leotiomycetes	o__Helotiales	f__Hyaloscyphaceae	g__Hyaloscyphaceae_gen_Incertae_sedis	s__Hyaloscyphaceae_sp
OTU048	MOSTABUND|n=59/28	20	8	31	PP151174	SH0962330.10FU	3.39167e-072	274.424	148	1	148	359	506	148	148	100	100	148	k__Fungi	p__Ascomycota	c__Dothideomycetes	o__Cladosporiales	f__Cladosporiaceae	g__Cladosporium	s__Cladosporium_cladosporioides
OTU049	MOSTABUND|n=59/27	21	13	25	UDB02000288	SH0944003.10FU	1.08119e-043	180.245	97	1	132	346	479	123	123	93.2	66.3	199	k__Fungi	p__Ascomycota	c__Eurotiomycetes	o__Chaetothyriales	f__Herpotrichiellaceae	g__Exophiala	s__Exophiala_sp
OTU050	MOSTABUND|n=57/27	20	13	24	UDB05377383	SH0949870.10FU	6.80457e-116	420.31	227	1	227	298	524	227	227	100	100	227	k__Fungi	p__Basidiomycota	c__Cystobasidiomycetes	o__Erythrobasidiales	f__Erythrobasidiales_fam_Incertae_sedis	g__Erythrobasidiales_gen_Incertae_sedis	s__Erythrobasidiales_sp
OTU051	MOSTABUND|n=55/26	25	17	13	UDB06550829	SH0946271.10FU	2.24642e-105	385.223	208	1	208	332	539	208	208	100	100	208	k__Fungi	p__Basidiomycota	c__Microbotryomycetes	o__Sporidiobolales	f__Sporidiobolaceae	g__Rhodotorula	s__Rhodotorula_sp
OTU052	MOSTABUND|n=54/27	17	9	28	KX822546	SH0986077.10FU	3.16379e-028	128.539	69	1	129	391	514	112	112	86.8	78.7	164	k__Fungi	p__Ascomycota	c__Eurotiomycetes	o__Chaetothyriales	f__Chaetothyriales_fam_Incertae_sedis	g__Chaetothyriales_gen_Incertae_sedis	s__Chaetothyriales_sp
OTU053	MOSTABUND|n=53/18	17	19	17	OR531385	SH0986908.10FU	1.85127e-085	318.744	172	1	172	390	561	172	172	100	100	172	k__Fungi	p__Ascomycota	c__Eurotiomycetes	o__Chaetothyriales	f__Herpotrichiellaceae	g__Exophiala	s__Exophiala_xenobiotica
OTU054	MOSTABUND|n=48/36	21	6	21	LC015666	SH0960444.10FU	1.52938e-050	202.405	109	1	141	341	483	132	132	93.6	100	141	k__Fungi	p__Ascomycota	c__Lecanoromycetes	o__Lecanoromycetes_ord_Incertae_sedis	f__Lecanoromycetes_fam_Incertae_sedis	g__Lecanoromycetes_gen_Incertae_sedis	s__Lecanoromycetes_sp
OTU055	MOSTABUND|n=46/19	16	10	20	MZ133732	SH0875505.10FU	2.96467e-053	211.638	114	1	160	421	584	148	148	92.5	100	160	k__Fungi	p__Ascomycota	c__Eurotiomycetes	o__Onygenales	f__Gymnoascaceae	g__Gymnoascus	s__Gymnoascus_halophilus
OTU056	MOSTABUND|n=45/27	13	14	18	LS998796	SH1015806.10FU	8.18478e-059	230.105	124	1	160	335	495	152	152	95	100	160	k__Fungi	p__Ascomycota	c__Dothideomycetes	o__Venturiales	f__Cylindrosympodiaceae	g__Septonema	s__Septonema_sp
OTU057	MOSTABUND|n=45/11	13	17	15	UDB02013834	SH0904555.10FU	2.19599e-085	318.744	172	1	196	361	557	189	189	96.4	98.5	199	k__Fungi	p__Ascomycota	c__Eurotiomycetes	o__Chaetothyriales	f__Herpotrichiellaceae	g__Exophiala	s__Exophiala_sp
OTU058	MOSTABUND|n=43/22	10	10	23	UDB03126426	SH0966817.10FU	2.01308e-049	198.712	107	1	143	327	469	132	132	92.3	100	143	k__Fungi	p__Ascomycota	c__Leotiomycetes	o__Leotiales	f__Tympanidaceae	g__Claussenomyces	s__Claussenomyces_sp
OTU059	MOSTABUND|n=42/14	2	14	26	AM901832	SH0934681.10FU	4.12437e-108	394.457	213	1	227	539	762	223	223	98.2	100	227	k__Fungi	p__Basidiomycota	c__Exobasidiomycetes	o__Exobasidiales	f__Exobasidiaceae	g__Exobasidium	s__Exobasidium_sp
OTU060	MOSTABUND|n=39/21	19	11	9															k_	p_	c_	o_	f_	g_	s_
OTU061	MOSTABUND|n=34/12	17	8	9	MZ573462	SH0735889.10FU	5.18273e-086	320.591	173	1	173	446	618	173	173	100	100	173	k__Fungi	p__Ascomycota	c__Dothideomycetes	o__Venturiales	f__Sympoventuriaceae	g__Ochroconis	s__Ochroconis_sp
OTU062	MOSTABUND|n=31/15	7	7	17	OR898185	SH0815720.10FU	1.72241e-096	355.677	192	1	204	454	658	201	201	98.5	100	204	k__Fungi	p__Basidiomycota	c__Agaricomycetes	o__Agaricales	f__Pleurotaceae	g__Hohenbuehelia	s__Hohenbuehelia_grisea
OTU063	MOSTABUND|n=28/4	6	8	14															k_	p_	c_	o_	f_	g_	s_
OTU064	MOSTABUND|n=27/4	3	1	23	OK335192	SH0888269.10FU	8.61313e-084	313.204	169	1	172	350	521	171	171	99.4	100	172	k__Fungi	p__Ascomycota	c__Eurotiomycetes	o__Eurotiales	f__Aspergillaceae	g__Aspergillus	s__Aspergillus_sp
OTU065	MOSTABUND|n=22/11	7	4	11															k_	p_	c_	o_	f_	g_	s_
OTU066	MOSTABUND|n=21/11	6	6	9	OU989284	SH0843807.10FU	7.47067e-074	279.964	151	1	151	351	501	151	151	100	100	151	k__Fungi	p__Ascomycota	c__Saccharomycetes	o__Saccharomycetales	f__Trichomonascaceae	g__Blastobotrys	s__Blastobotrys_arbuscula
OTU067	MOSTABUND|n=20/1	10	4	6	UDB03609281	SH1012176.10FU	2.55325e-068	261.498	141	1	144	317	460	143	143	99.3	100	144	k__Fungi	p__Ascomycota	c__Leotiomycetes	o__Helotiales	f__Helotiales_fam_Incertae_sedis	g__Infundichalara	s__Infundichalara_sp
OTU068	MOSTABUND|n=19/11	7	8	4	KT264384	SH0904651.10FU	7.62267e-085	316.897	171	1	193	387	578	186	186	96.4	100	193	k__Fungi	p__Ascomycota	c__Eurotiomycetes	o__Chaetothyriales	f__Herpotrichiellaceae	g__Exophiala	s__Exophiala_sp
OTU069	MOSTABUND|n=19/1	12	5	2	UDB03610486	SH1012176.10FU	1.18791e-066	255.958	138	1	144	317	460	142	142	98.6	100	144	k__Fungi	p__Ascomycota	c__Leotiomycetes	o__Helotiales	f__Helotiales_fam_Incertae_sedis	g__Infundichalara	s__Infundichalara_sp
OTU070	MOSTABUND|n=18/12	6	5	7	UDB05349834	SH0867021.10FU	1.41853e-032	143.312	77	18	193	302	478	147	147	83.5	88.4	199	k__Fungi	p__Basidiomycota	c__Pucciniomycetes	o__Platygloeales	f__Eocronartiaceae	g__Eocronartium	s__Eocronartium_sp
OTU071	MOSTABUND|n=17/9	5	2	10	KM104110	SH0967380.10FU	2.15769e-064	248.571	134	1	154	366	521	149	149	96.8	100	154	k__Fungi	p__Fungi_phy_Incertae_sedis	c__Fungi_cls_Incertae_sedis	o__Fungi_ord_Incertae_sedis	f__Fungi_fam_Incertae_sedis	g__Fungi_gen_Incertae_sedis	s__Fungi_sp
OTU072	MOSTABUND|n=17/4	6	4	7	OR091312	SH0974820.10FU	2.7278e-079	298.431	161	1	191	369	559	182	182	95.3	100	191	k__Fungi	p__Ascomycota	c__Eurotiomycetes	o__Chaetothyriales	f__Herpotrichiellaceae	g__Capronia	s__Capronia_sp
OTU073	MOSTABUND|n=16/6	5	8	3	UDB01571240	SH0947752.10FU	1.71027e-101	372.297	201	1	204	297	500	203	203	99.5	100	204	k__Fungi	p__Basidiomycota	c__Cystobasidiomycetes	o__Buckleyzymales	f__Buckleyzymaceae	g__Buckleyzyma	s__Buckleyzyma_sp
OTU074	MOSTABUND|n=16/3	9	2	5	UDB01990490	SH0976639.10FU	8.79133e-084	313.204	169	1	175	356	530	173	173	98.9	100	175	k__Fungi	p__Ascomycota	c__Eurotiomycetes	o__Chaetothyriales	f__Herpotrichiellaceae	g__Exophiala	s__Exophiala_sp
OTU075	MOSTABUND|n=14/10	2	3	9	OX346372	SH0763677.10FU	7.34168e-069	263.345	142	1	148	318	465	146	146	98.6	100	148	k__Fungi	p__Ascomycota	c__Dothideomycetes	o__Mycosphaerellales	f__Neodevriesiaceae	g__Neodevriesia	s__Neodevriesia_fraserae
OTU076	MOSTABUND|n=14/3	4	5	5	OR623240	SH0841251.10FU	1.00024e-098	363.064	196	1	199	263	462	199	199	100	100	199	k__Fungi	p__Basidiomycota	c__Agaricostilbomycetes	o__Agaricostilbales	f__Chionosphaeraceae	g__Kurtzmanomyces	s__Kurtzmanomyces_sp
OTU077	MOSTABUND|n=13/6	5	6	2	KF360373	SH0737941.10FU	1.7063e-060	235.645	127	1	139	317	455	135	135	97.1	89.1	156	k__Fungi	p__Ascomycota	c__Lecanoromycetes	o__Umbilicariales	f__Elixiaceae	g__Elixia	s__Elixia_flexella
OTU078	MOSTABUND|n=13/4	1	5	7	MK801314	SH0950131.10FU	1.01375e-077	292.891	158	1	158	392	549	158	158	100	100	158	k__Fungi	p__Ascomycota	c__Xylonomycetes	o__Symbiotaphrinales	f__Symbiotaphrinaceae	g__Symbiotaphrina	s__Symbiotaphrina_microtheca
OTU079	MOSTABUND|n=12/4	4	4	4	FM173097	SH0974823.10FU	7.48491e-085	316.897	171	1	189	359	548	184	184	97.4	99.5	190	k__Fungi	p__Ascomycota	c__Eurotiomycetes	o__Chaetothyriales	f__Herpotrichiellaceae	g__Exophiala	s__Exophiala_sp
OTU080	MOSTABUND|n=12/5	3	1	8	UDB0525539	SH0924986.10FU	6.00805e-075	283.658	153	1	156	328	483	155	155	99.4	100	156	k__Fungi	p__Ascomycota	c__Dothideomycetes	o__Mytilinidiales	f__Mytilinidiaceae	g__Lophium	s__Lophium_sp
OTU081	MOSTABUND|n=12/5	5	7	0	LT548263	SH0734002.10FU	3.39464e-089	331.671	179	1	234	342	580	220	220	94	100	234	k__Fungi	p__Basidiomycota	c__Microbotryomycetes	o__Microbotryomycetes_ord_Incertae_sedis	f__Colacogloeaceae	g__Colacogloea	s__Colacogloea_sp
OTU082	MOSTABUND|n=12/6	6	1	5	OQ694453	SH0899106.10FU	1.96687e-056	222.718	120	1	213	442	648	184	184	86.4	97.7	218	k__Fungi	p__Basidiomycota	c__Agaricostilbomycetes	o__Agaricostilbales	f__Chionosphaeraceae	g__Chionosphaera	s__Chionosphaera_cuniculicola
OTU083	MOSTABUND|n=11/3	6	4	1															k_	p_	c_	o_	f_	g_	s_
OTU084	MOSTABUND|n=11/5	4	4	3															k_	p_	c_	o_	f_	g_	s_
OTU085	MOSTABUND|n=11/5	8	1	2	OR752061	SH0939958.10FU	3.84148e-082	307.664	166	1	166	365	530	166	166	100	100	166	k__Fungi	p__Ascomycota	c__Eurotiomycetes	o__Eurotiales	f__Aspergillaceae	g__Aspergillus	s__Aspergillus_tubingensis
OTU086	MOSTABUND|n=11/5	4	4	3	GQ169320	SH0973416.10FU	2.36174e-084	315.051	170	1	170	347	516	170	170	100	100	170	k__Fungi	p__Ascomycota	c__Eurotiomycetes	o__Eurotiales	f__Trichocomaceae	g__Sagenomella	s__Sagenomella_griseoviridis
OTU087	MOSTABUND|n=10/5	1	3	6	HQ211632	SH0934667.10FU	3.60198e-093	344.597	186	1	198	373	570	194	194	98	100	198	k__Fungi	p__Basidiomycota	c__Exobasidiomycetes	o__Exobasidiales	f__Exobasidiaceae	g__Exobasidiaceae_gen_Incertae_sedis	s__Exobasidiaceae_sp
OTU088	MOSTABUND|n=10/3	3	2	5	UDB01624955	SH0976701.10FU	5.67491e-091	337.211	182	1	188	353	540	186	186	98.9	100	188	k__Fungi	p__Ascomycota	c__Eurotiomycetes	o__Chaetothyriales	f__Herpotrichiellaceae	g__Capronia	s__Capronia_sp
OTU089	MOSTABUND|n=10/3	1	8	1															k_	p_	c_	o_	f_	g_	s_
OTU090	MOSTABUND|n=10/3	5	1	4	KJ522801	SH0904731.10FU	1.27885e-097	359.37	194	1	197	365	562	197	197	100	100	197	k__Fungi	p__Ascomycota	c__Eurotiomycetes	o__Chaetothyriales	f__Herpotrichiellaceae	g__Exophiala	s__Exophiala_heteromorpha
OTU091	MOSTABUND|n=10/3	2	2	6	MK050392	SH0964633.10FU	1.39312e-057	226.412	122	1	184	2085	2270	167	167	90.8	91.1	202	k__Fungi	p__Basidiomycota	c__Cystobasidiomycetes	o__Cystobasidiales	f__Cystobasidiales_fam_Incertae_sedis	g__Robertozyma	s__Robertozyma_ningxiaensis
OTU092	MOSTABUND|n=10/3	5	3	2															k_	p_	c_	o_	f_	g_	s_
OTU093	MOSTABUND|n=9/1	4	0	5	OR810007	SH0939434.10FU	1.72226e-075	285.504	154	1	160	301	460	158	158	98.8	100	160	k__Fungi	p__Ascomycota	c__Eurotiomycetes	o__Eurotiales	f__Aspergillaceae	g__Penicillium	s__Penicillium_bialowiezense
OTU094	MOSTABUND|n=9/4	5	1	3	UDB04160857	SH0939704.10FU	2.84012e-078	294.738	159	1	159	336	494	159	159	100	100	159	k__Fungi	p__Ascomycota	c__Eurotiomycetes	o__Eurotiales	f__Aspergillaceae	g__Penicillium	s__Penicillium_sp
OTU095	MOSTABUND|n=8/4	0	8	0	OQ717810	SH0843146.10FU	6.09834e-066	254.111	137	1	172	466	634	162	162	94.2	88.7	194	k__Fungi	p__Ascomycota	c__Eurotiomycetes	o__Mycocaliciales	f__Mycocaliciaceae	g__Chaenothecopsis	s__Chaenothecopsis_sp
OTU096	MOSTABUND|n=7/4	3	2	2	KF274298	SH1027636.10FU	3.44208e-023	111.919	60	1	63	418	480	62	62	98.4	36	175	k__Fungi	p__Fungi_phy_Incertae_sedis	c__Fungi_cls_Incertae_sedis	o__Fungi_ord_Incertae_sedis	f__Fungi_fam_Incertae_sedis	g__Fungi_gen_Incertae_sedis	s__Fungi_sp
OTU097	MOSTABUND|n=7/2	1	2	4	OQ690209	SH0964714.10FU	2.21854e-090	335.364	181	1	202	324	525	195	195	96.5	100	202	k__Fungi	p__Basidiomycota	c__Cystobasidiomycetes	o__Cystobasidiales	f__Cystobasidiaceae	g__Cystobasidium	s__Cystobasidium_calyptogenae
OTU098	MOSTABUND|n=7/4	3	2	2	UDB019754	SH0885763.10FU	3.51384e-098	361.217	195	1	195	372	566	195	195	100	100	195	k__Fungi	p__Basidiomycota	c__Exobasidiomycetes	o__Exobasidiales	f__Brachybasidiaceae	g__Meira	s__Meira_sp
OTU099	MOSTABUND|n=7/1	3	2	2	MK212381	SH0763728.10FU	9.74186e-073	276.271	149	1	152	390	541	151	151	99.3	100	152	k__Fungi	p__Ascomycota	c__Ascomycota_cls_Incertae_sedis	o__Ascomycota_ord_Incertae_sedis	f__Ascomycota_fam_Incertae_sedis	g__Ascomycota_gen_Incertae_sedis	s__Ascomycota_sp
OTU100	MOSTABUND|n=7/1	4	1	2															k_	p_	c_	o_	f_	g_	s_
OTU101	MOSTABUND|n=7/2	3	1	3	OP941495	SH0953911.10FU	2.51947e-105	385.223	208	2	230	309	537	222	222	96.9	99.6	230	k__Fungi	p__Basidiomycota	c__Tremellomycetes	o__Filobasidiales	f__Piskurozymaceae	g__Solicoccozyma	s__Solicoccozyma_sp
OTU102	MOSTABUND|n=7/2	4	1	2															k_	p_	c_	o_	f_	g_	s_
OTU103	MOSTABUND|n=7/4	3	2	2	MW710662	SH0915545.10FU	5.18273e-086	320.591	173	1	173	331	503	173	173	100	100	173	k__Fungi	p__Ascomycota	c__Dothideomycetes	o__Dothideales	f__Zalariaceae	g__Zalaria	s__Zalaria_alba
OTU104	MOSTABUND|n=7/4	5	1	1															k_	p_	c_	o_	f_	g_	s_
OTU105	MOSTABUND|n=7/2	0	3	4	LC643135	SH0878054.10FU	3.01238e-083	311.357	168	1	168	384	551	168	168	100	100	168	k__Fungi	p__Ascomycota	c__Eurotiomycetes	o__Eurotiales	f__Aspergillaceae	g__Aspergillus	s__Aspergillus_conicus
OTU106	MOSTABUND|n=7/2	1	1	5	OR762723	SH0862152.10FU	1.64456e-075	285.504	154	1	154	320	473	154	154	100	100	154	k__Fungi	p__Ascomycota	c__Dothideomycetes	o__Pleosporales	f__Didymellaceae	g__Epicoccum	s__Epicoccum_nigrum
OTU107	MOSTABUND|n=7/5	3	2	2	KU580076	SH0959039.10FU	2.84012e-078	294.738	159	1	159	355	513	159	159	100	100	159	k__Fungi	p__Ascomycota	c__Dothideomycetes	o__Capnodiales	f__Capnodiales_fam_Incertae_sedis	g__Capnodiales_gen_Incertae_sedis	s__Capnodiales_sp
OTU108	MOSTABUND|n=6/4	4	2	0	DQ494360	SH0965749.10FU	1.32138e-076	289.198	156	1	159	316	474	158	158	99.4	100	159	k__Fungi	p__Ascomycota	c__Orbiliomycetes	o__Orbiliales	f__Orbiliaceae	g__Dactylella	s__Dactylella_tenuis
OTU109	MOSTABUND|n=6/4	4	1	1	MZ503735	SH0985059.10FU	2.87382e-104	381.53	206	1	206	502	707	206	206	100	100	206	k__Fungi	p__Ascomycota	c__Dothideomycetes	o__Venturiales	f__Sympoventuriaceae	g__Scolecobasidium	s__Scolecobasidium_globale
OTU110	MOSTABUND|n=6/6	6	0	0	OR378530	SH0856167.10FU	2.36174e-084	315.051	170	1	170	312	481	170	170	100	100	170	k__Fungi	p__Basidiomycota	c__Tremellomycetes	o__Trichosporonales	f__Trichosporonaceae	g__Trichosporon	s__Trichosporon_sp
OTU111	MOSTABUND|n=5/1	1	2	2	OR803396	SH0939434.10FU	3.70176e-077	291.044	157	1	160	362	521	159	159	99.4	100	160	k__Fungi	p__Ascomycota	c__Eurotiomycetes	o__Eurotiales	f__Aspergillaceae	g__Penicillium	s__Penicillium_sp
OTU112	MOSTABUND|n=5/3	3	0	2	DQ870625	SH0880564.10FU	5.51045e-122	440.623	238	1	238	356	593	238	238	100	100	238	k__Fungi	p__Basidiomycota	c__Microbotryomycetes	o__Microbotryomycetes_ord_Incertae_sedis	f__Colacogloeaceae	g__Colacogloea	s__Colacogloea_subericola
OTU113	MOSTABUND|n=5/1	2	2	1	UDB01788704	SH0944887.10FU	8.06979e-069	263.345	142	1	160	334	493	154	154	96.3	100	160	k__Fungi	p__Ascomycota	c__Eurotiomycetes	o__Chaetothyriales	f__Chaetothyriales_fam_Incertae_sedis	g__Chaetothyriales_gen_Incertae_sedis	s__Chaetothyriales_sp
OTU114	MOSTABUND|n=5/1	2	0	3	MG707511	SH0974827.10FU	3.04486e-109	398.15	215	1	218	429	646	217	217	99.5	100	218	k__Fungi	p__Ascomycota	c__Eurotiomycetes	o__Chaetothyriales	f__Herpotrichiellaceae	g__Herpotrichiellaceae_gen_Incertae_sedis	s__Herpotrichiellaceae_sp
OTU115	MOSTABUND|n=5/3	1	1	3	OW985768	SH0960075.10FU	1.29135e-076	289.198	156	1	156	362	517	156	156	100	100	156	k__Fungi	p__Ascomycota	c__Dothideomycetes	o__Pleosporales	f__Coniothyriaceae	g__Ochrocladosporium	s__Ochrocladosporium_elatum
OTU116	MOSTABUND|n=5/1	2	2	1	GU062229	SH0926075.10FU	1.28543e-123	446.163	241	1	252	308	561	250	250	99.2	98.4	256	k__Fungi	p__Basidiomycota	c__Basidiomycota_cls_Incertae_sedis	o__Basidiomycota_ord_Incertae_sedis	f__Basidiomycota_fam_Incertae_sedis	g__Basidiomycota_gen_Incertae_sedis	s__Basidiomycota_sp
OTU117	MOSTABUND|n=5/3	2	3	0															k_	p_	c_	o_	f_	g_	s_
OTU118	MOSTABUND|n=5/3	0	4	1															k_	p_	c_	o_	f_	g_	s_
OTU119	MOSTABUND|n=4/2	3	0	1	UDB01766759	SH1001257.10FU	1.64456e-075	285.504	154	1	154	333	486	154	154	100	100	154	k__Fungi	p__Ascomycota	c__Eurotiomycetes	o__Chaetothyriales	f__Chaetothyriales_fam_Incertae_sedis	g__Chaetothyriales_gen_Incertae_sedis	s__Chaetothyriales_sp
OTU120	MOSTABUND|n=4/4	2	1	1	KF274277	SH0881288.10FU	5.86833e-075	283.658	153	1	153	345	497	153	153	100	100	153	k__Fungi	p__Basidiomycota	c__Tremellomycetes	o__Tremellales	f__Tremellales_fam_Incertae_sedis	g__Tremellales_gen_Incertae_sedis	s__Tremellales_sp
OTU121	MOSTABUND|n=4/2	1	1	2	HQ611336	SH0846888.10FU	3.39167e-072	274.424	148	1	148	296	443	148	148	100	100	148	k__Fungi	p__Mortierellomycota	c__Mortierellomycetes	o__Mortierellales	f__Mortierellales_fam_Incertae_sedis	g__Mortierellales_gen_Incertae_sedis	s__Mortierellales_sp
OTU122	MOSTABUND|n=4/1	0	2	2	KM014588	SH0964652.10FU	2.81707e-094	348.29	188	1	200	283	483	197	197	98.5	100	200	k__Fungi	p__Basidiomycota	c__Cystobasidiomycetes	o__Cystobasidiales	f__Cystobasidiaceae	g__Cystobasidium	s__Cystobasidium_minutum
OTU123	MOSTABUND|n=4/2	3	0	1															k_	p_	c_	o_	f_	g_	s_
OTU124	MOSTABUND|n=4/1	4	0	0	FM173097	SH0974823.10FU	2.09177e-090	335.364	181	1	191	359	548	188	188	98.4	99.5	192	k__Fungi	p__Ascomycota	c__Eurotiomycetes	o__Chaetothyriales	f__Herpotrichiellaceae	g__Exophiala	s__Exophiala_sp
OTU125	MOSTABUND|n=4/1	1	1	2	UDB07650033	SH0948279.10FU	2.07665e-060	235.645	127	2	172	291	452	158	158	92.4	92.9	184	k__Fungi	p__Ascomycota	c__Saccharomycetes	o__Saccharomycetales	f__Trichomonascaceae	g__Sugiyamaella	s__Sugiyamaella_sp
OTU126	MOSTABUND|n=4/2	2	2	0	JN053509	SH0847499.10FU	9.75532e-100	366.757	198	1	235	343	576	225	225	95.7	96.3	244	k__Fungi	p__Basidiomycota	c__Tremellomycetes	o__Filobasidiales	f__Filobasidiaceae	g__Syzygospora	s__Syzygospora_alba
OTU127	MOSTABUND|n=4/2	0	3	1															k_	p_	c_	o_	f_	g_	s_
OTU128	MOSTABUND|n=4/1	2	0	2															k_	p_	c_	o_	f_	g_	s_
OTU129	MOSTABUND|n=3/3	2	1	0	UDB0681378	SH0950387.10FU	1.20978e-071	272.578	147	1	147	321	467	147	147	100	100	147	k__Fungi	p__Ascomycota	c__Leotiomycetes	o__Thelebolales	f__Pseudeurotiaceae	g__Pseudeurotium	s__Pseudeurotium_sp
OTU130	MOSTABUND|n=3/3	1	0	2	UDB02747428	SH0960493.10FU	1.93347e-059	231.952	125	1	140	295	434	135	135	96.4	100	140	k__Fungi	p__Ascomycota	c__Eurotiomycetes	o__Eurotiomycetes_ord_Incertae_sedis	f__Eurotiomycetes_fam_Incertae_sedis	g__Eurotiomycetes_gen_Incertae_sedis	s__Eurotiomycetes_sp
OTU131	MOSTABUND|n=3/1	1	2	0	OL739376	SH0743871.10FU	1.33076e-071	272.578	147	1	159	407	565	155	155	97.5	100	159	k__Fungi	p__Basidiomycota	c__Tremellomycetes	o__Tremellales	f__Naemateliaceae	g__Naematelia	s__Naematelia_encephala
OTU132	MOSTABUND|n=3/1	1	1	1	MK491201	SH0964639.10FU	5.9149e-096	353.83	191	1	196	255	450	194	194	99	100	196	k__Fungi	p__Basidiomycota	c__Cystobasidiomycetes	o__Cyphobasidiales	f__Cyphobasidiales_fam_Incertae_sedis	g__Cyphobasidiales_gen_Incertae_sedis	s__Cyphobasidiales_sp
OTU133	MOSTABUND|n=3/1	1	1	1															k_	p_	c_	o_	f_	g_	s_
OTU134	MOSTABUND|n=3/1	0	1	2	OR761551	SH0887053.10FU	5.78065e-091	337.211	182	1	191	356	546	188	188	98.4	100	191	k__Fungi	p__Ascomycota	c__Saccharomycetes	o__Saccharomycetales	f__Debaryomycetaceae	g__Meyerozyma	s__Meyerozyma_guilliermondii
OTU135	MOSTABUND|n=3/1	1	1	1	DQ870625	SH0880564.10FU	6.04127e-057	224.565	121	1	238	356	593	205	205	86.1	100	238	k__Fungi	p__Basidiomycota	c__Microbotryomycetes	o__Microbotryomycetes_ord_Incertae_sedis	f__Colacogloeaceae	g__Colacogloea	s__Colacogloea_subericola
OTU136	MOSTABUND|n=3/3	2	1	0	UDB0952315	SH0992159.10FU	2.21577e-045	185.785	100	31	176	308	452	131	131	89.7	76.4	191	k__Fungi	p__Basidiomycota	c__Agaricostilbomycetes	o__Agaricostilbales	f__Agaricostilbales_fam_Incertae_sedis	g__Agaricostilbales_gen_Incertae_sedis	s__Agaricostilbales_sp
OTU137	MOSTABUND|n=3/1	0	1	2	UDB05349834	SH0867021.10FU	3.05273e-029	132.232	71	20	192	305	478	145	145	83.8	87.4	198	k__Fungi	p__Basidiomycota	c__Pucciniomycetes	o__Platygloeales	f__Eocronartiaceae	g__Eocronartium	s__Eocronartium_sp
OTU138	MOSTABUND|n=3/3	0	2	1	KM104151	SH0907363.10FU	4.96695e-087	324.284	175	1	205	390	594	197	197	96.1	98.6	208	k__Fungi	p__Fungi_phy_Incertae_sedis	c__Fungi_cls_Incertae_sedis	o__Fungi_ord_Incertae_sedis	f__Fungi_fam_Incertae_sedis	g__Fungi_gen_Incertae_sedis	s__Fungi_sp
OTU139	MOSTABUND|n=3/1	0	0	3	UDB07674985	SH1012176.10FU	1.18791e-066	255.958	138	1	144	315	458	142	142	98.6	100	144	k__Fungi	p__Ascomycota	c__Leotiomycetes	o__Helotiales	f__Pezizellaceae	g__Ciliolarina	s__Ciliolarina_sp
OTU140	MOSTABUND|n=3/3	2	0	1	OR623243	SH0958738.10FU	1.74869e-080	302.124	163	1	163	289	451	163	163	100	100	163	k__Fungi	p__Ascomycota	c__Saccharomycetes	o__Saccharomycetales	f__Trichomonascaceae	g__Blastobotrys	s__Blastobotrys_sp
OTU141	MOSTABUND|n=3/3	1	1	1	MK782305	SH0850121.10FU	1.33784e-051	206.098	111	1	156	323	490	151	151	96.8	100	156	k__Fungi	p__Ascomycota	c__Saccharomycetes	o__Saccharomycetales	f__Saccharomycetales_fam_Incertae_sedis	g__Saccharomycetales_gen_Incertae_sedis	s__Saccharomycetales_sp
OTU142	MOSTABUND|n=2/1	1	0	1	OR623243	SH0958738.10FU	6.56666e-070	267.038	144	1	167	289	451	160	160	95.8	100	167	k__Fungi	p__Ascomycota	c__Saccharomycetes	o__Saccharomycetales	f__Trichomonascaceae	g__Blastobotrys	s__Blastobotrys_sp
OTU143	MOSTABUND|n=2/2	0	2	0															k_	p_	c_	o_	f_	g_	s_
OTU144	MOSTABUND|n=2/1	0	0	2	MH188916	SH0926074.10FU	3.35546e-104	381.53	206	1	232	347	580	226	226	97.4	98.3	236	k__Fungi	p__Basidiomycota	c__Exobasidiomycetes	o__Exobasidiales	f__Exobasidiales_fam_Incertae_sedis	g__Guomyces	s__Guomyces_nicotianae
OTU145	MOSTABUND|n=2/1	0	1	1	OR387067	SH0974819.10FU	1.85172e-106	388.917	210	1	220	363	580	217	217	98.6	100	220	k__Fungi	p__Ascomycota	c__Eurotiomycetes	o__Chaetothyriales	f__Herpotrichiellaceae	g__Exophiala	s__Exophiala_dermatitidis
OTU146	MOSTABUND|n=2/1	2	0	0	MZ025963	SH0763728.10FU	5.86833e-075	283.658	153	1	153	325	477	153	153	100	100	153	k__Fungi	p__Ascomycota	c__Dothideomycetes	o__Mycosphaerellales	f__Neodevriesiaceae	g__Neodevriesia	s__Neodevriesia_kalakoutskii
OTU147	MOSTABUND|n=2/1	0	1	1															k_	p_	c_	o_	f_	g_	s_
OTU148	MOSTABUND|n=2/1	0	0	2	JN032542	SH0828390.10FU	2.29183e-054	215.332	116	1	158	401	559	145	145	91.8	98.8	160	k__Fungi	p__Ascomycota	c__Eurotiomycetes	o__Chaetothyriales	f__Chaetothyriales_fam_Incertae_sedis	g__Chaetothyriales_gen_Incertae_sedis	s__Chaetothyriales_sp
OTU149	MOSTABUND|n=2/1	0	0	2	OR633242	SH0939544.10FU	1.74869e-080	302.124	163	1	163	466	628	163	163	100	100	163	k__Fungi	p__Ascomycota	c__Eurotiomycetes	o__Eurotiales	f__Aspergillaceae	g__Penicillium	s__Penicillium_hirsutum
OTU150	MOSTABUND|n=2/1	1	0	1	KF780603	SH0838052.10FU	3.61826e-077	291.044	157	1	157	306	462	157	157	100	100	157	k__Fungi	p__Ascomycota	c__Sordariomycetes	o__Hypocreales	f__Hypocreales_fam_Incertae_sedis	g__Hypocreales_gen_Incertae_sedis	s__Hypocreales_sp
OTU151	MOSTABUND|n=2/1	0	0	2	UDB02020736	SH0843027.10FU	9.34009e-068	259.651	140	1	146	305	450	144	144	98.6	100	146	k__Fungi	p__Ascomycota	c__Dothideomycetes	o__Mycosphaerellales	f__Teratosphaeriaceae	g__Neocatenulostroma	s__Neocatenulostroma_sp
OTU152	MOSTABUND|n=2/1	1	1	0	OR069551	SH0767731.10FU	1.76111e-075	285.504	154	1	163	331	493	161	161	98.8	100	163	k__Fungi	p__Ascomycota	c__Eurotiomycetes	o__Eurotiales	f__Aspergillaceae	g__Penicillium	s__Penicillium_corylophilum
OTU153	MOSTABUND|n=2/1	0	1	1	UDB06553245	SH0965184.10FU	2.73027e-073	278.118	150	1	153	328	480	152	152	99.3	100	153	k__Fungi	p__Ascomycota	c__Sareomycetes	o__Sareales	f__Sareaceae	g__Sarea	s__Sarea_sp
OTU154	MOSTABUND|n=2/1	1	0	1	OK335192	SH0888269.10FU	1.43149e-076	289.198	156	1	170	350	521	167	167	98.2	100	170	k__Fungi	p__Ascomycota	c__Eurotiomycetes	o__Eurotiales	f__Aspergillaceae	g__Aspergillus	s__Aspergillus_sp
OTU155	MOSTABUND|n=2/1	2	0	0															k_	p_	c_	o_	f_	g_	s_
OTU156	MOSTABUND|n=2/1	1	1	0	OR769498	SH0925964.10FU	7.65141e-074	279.964	151	1	154	394	547	153	153	99.4	100	154	k__Fungi	p__Ascomycota	c__Dothideomycetes	o__Dothideales	f__Saccotheciaceae	g__Aureobasidium	s__Aureobasidium_pullulans
OTU157	MOSTABUND|n=2/1	1	1	0	OR778324	SH0974277.10FU	1.03697e-077	292.891	158	1	161	385	545	160	160	99.4	100	161	k__Fungi	p__Ascomycota	c__Pezizomycetes	o__Pezizales	f__Pyronemataceae	g__Pyronema	s__Pyronema_sp
OTU158	MOSTABUND|n=2/1	2	0	0	OQ694461	SH0958688.10FU	7.85747e-044	180.245	97	1	152	407	563	138	138	90.8	100	152	k__Fungi	p__Basidiomycota	c__Tremellomycetes	o__Tremellales	f__Sirobasidiaceae	g__Fibulobasidium	s__Fibulobasidium_inconspicuum
OTU159	MOSTABUND|n=2/1	1	0	1	UDB05269281	SH0868848.10FU	6.56694e-075	283.658	153	1	168	393	560	163	163	97	100	168	k__Fungi	p__Ascomycota	c__Dothideomycetes	o__Dothideomycetes_ord_Incertae_sedis	f__Dothideomycetes_fam_Incertae_sedis	g__Dothideomycetes_gen_Incertae_sedis	s__Dothideomycetes_sp
OTU160	MOSTABUND|n=2/1	1	0	1	OR623240	SH0841251.10FU	2.87373e-084	315.051	170	1	201	263	462	192	192	95.5	100	201	k__Fungi	p__Basidiomycota	c__Agaricostilbomycetes	o__Agaricostilbales	f__Chionosphaeraceae	g__Kurtzmanomyces	s__Kurtzmanomyces_sp
OTU161	MOSTABUND|n=2/1	0	2	0	OQ568166	SH0964631.10FU	4.70145e-102	374.144	202	1	202	272	473	202	202	100	100	202	k__Fungi	p__Basidiomycota	c__Cystobasidiomycetes	o__Cystobasidiales	f__Cystobasidiaceae	g__Cystobasidium	s__Cystobasidium_slooffiae
OTU162	MOSTABUND|n=2/1	2	0	0	GU062229	SH0926075.10FU	1.64537e-117	425.85	230	1	248	308	561	247	247	99.6	98.4	252	k__Fungi	p__Basidiomycota	c__Basidiomycota_cls_Incertae_sedis	o__Basidiomycota_ord_Incertae_sedis	f__Basidiomycota_fam_Incertae_sedis	g__Basidiomycota_gen_Incertae_sedis	s__Basidiomycota_sp
OTU163	MOSTABUND|n=2/1	1	1	0	UDB04263802	SH0767731.10FU	2.92529e-073	278.118	150	1	162	333	495	159	159	98.1	100	162	k__Fungi	p__Ascomycota	c__Eurotiomycetes	o__Eurotiales	f__Aspergillaceae	g__Penicillium	s__Penicillium_sp
OTU164	MOSTABUND|n=2/1	0	0	2	UDB01773080	SH0961639.10FU	4.85878e-071	270.731	146	1	161	354	514	156	156	96.9	100	161	k__Fungi	p__Ascomycota	c__Eurotiomycetes	o__Chaetothyriales	f__Chaetothyriales_fam_Incertae_sedis	g__Chaetothyriales_gen_Incertae_sedis	s__Chaetothyriales_sp
OTU165	MOSTABUND|n=2/2	0	2	0	LC317582	SH0976373.10FU	5.46342e-091	337.211	182	1	182	382	563	182	182	100	100	182	k__Fungi	p__Ascomycota	c__Eurotiomycetes	o__Chaetothyriales	f__Herpotrichiellaceae	g__Exophiala	s__Exophiala_angulospora
OTU166	SINGLETON|n=1	1	0	0	OQ448344	SH0964621.10FU	1.69322e-096	355.677	192	1	201	318	518	198	198	98.5	100	201	k__Fungi	p__Basidiomycota	c__Cystobasidiomycetes	o__Cystobasidiales	f__Cystobasidiaceae	g__Cystobasidium	s__Cystobasidium_laryngis
OTU167	SINGLETON|n=1	1	0	0	OP023249	SH0734755.10FU	3.47559e-093	344.597	186	1	192	412	603	190	190	99	100	192	k__Fungi	p__Basidiomycota	c__Agaricomycetes	o__Russulales	f__Peniophoraceae	g__Peniophora	s__Peniophora_sp
OTU168	SINGLETON|n=1	1	0	0	OR387067	SH0974819.10FU	1.42669e-102	375.99	203	1	218	363	580	213	213	97.7	100	218	k__Fungi	p__Ascomycota	c__Eurotiomycetes	o__Chaetothyriales	f__Herpotrichiellaceae	g__Exophiala	s__Exophiala_dermatitidis
OTU169	SINGLETON|n=1	1	0	0															k_	p_	c_	o_	f_	g_	s_
OTU170	SINGLETON|n=1	1	0	0	MN071391	SH1043354.10FU	1.88419e-101	372.297	201	1	222	297	518	215	215	96.8	100	222	k__Fungi	p__Fungi_phy_Incertae_sedis	c__Fungi_cls_Incertae_sedis	o__Fungi_ord_Incertae_sedis	f__Fungi_fam_Incertae_sedis	g__Fungi_gen_Incertae_sedis	s__Fungi_sp
OTU171	SINGLETON|n=1	1	0	0	OR069551	SH0767731.10FU	3.81213e-072	274.424	148	1	163	331	493	158	158	96.9	100	163	k__Fungi	p__Ascomycota	c__Eurotiomycetes	o__Eurotiales	f__Aspergillaceae	g__Penicillium	s__Penicillium_corylophilum
OTU172	SINGLETON|n=1	1	0	0	GU062229	SH0926075.10FU	1.70124e-112	409.23	221	1	254	308	561	243	243	95.7	98.4	258	k__Fungi	p__Basidiomycota	c__Basidiomycota_cls_Incertae_sedis	o__Basidiomycota_ord_Incertae_sedis	f__Basidiomycota_fam_Incertae_sedis	g__Basidiomycota_gen_Incertae_sedis	s__Basidiomycota_sp
OTU173	SINGLETON|n=1	1	0	0	KX766170	SH0907362.10FU	1.82945e-096	355.677	192	1	215	372	588	209	209	97.2	100	215	k__Fungi	p__Basidiomycota	c__Tritirachiomycetes	o__Tritirachiales	f__Tritirachiaceae	g__Paratritirachium	s__Paratritirachium_sp
OTU174	SINGLETON|n=1	1	0	0	MK019050	SH1027467.10FU	1.07576e-082	309.511	167	1	167	163	329	167	167	100	100	167	k__Fungi	p__Ascomycota	c__Pezizomycetes	o__Pezizales	f__Pyronemataceae	g__Scutellinia	s__Scutellinia_sp
OTU175	SINGLETON|n=1	1	0	0															k_	p_	c_	o_	f_	g_	s_
OTU176	SINGLETON|n=1	1	0	0	OR122849	SH1025978.10FU	8.31535e-079	296.584	160	1	166	390	555	164	164	98.8	100	166	k__Fungi	p__Ascomycota	c__Sordariomycetes	o__Hypocreales	f__Hypocreaceae	g__Trichoderma	s__Trichoderma_sp
OTU177	SINGLETON|n=1	1	0	0	GU062229	SH0926075.10FU	2.2355e-106	388.917	210	1	256	308	561	241	241	94.1	98.5	260	k__Fungi	p__Basidiomycota	c__Basidiomycota_cls_Incertae_sedis	o__Basidiomycota_ord_Incertae_sedis	f__Basidiomycota_fam_Incertae_sedis	g__Basidiomycota_gen_Incertae_sedis	s__Basidiomycota_sp
OTU178	SINGLETON|n=1	1	0	0	GU062229	SH0926075.10FU	3.6724e-114	414.77	224	1	255	308	561	245	245	96.1	98.5	259	k__Fungi	p__Basidiomycota	c__Basidiomycota_cls_Incertae_sedis	o__Basidiomycota_ord_Incertae_sedis	f__Basidiomycota_fam_Incertae_sedis	g__Basidiomycota_gen_Incertae_sedis	s__Basidiomycota_sp
OTU179	SINGLETON|n=1	1	0	0	GU062229	SH0926075.10FU	3.64651e-119	431.39	233	1	255	308	561	248	248	97.3	98.5	259	k__Fungi	p__Basidiomycota	c__Basidiomycota_cls_Incertae_sedis	o__Basidiomycota_ord_Incertae_sedis	f__Basidiomycota_fam_Incertae_sedis	g__Basidiomycota_gen_Incertae_sedis	s__Basidiomycota_sp
OTU180	SINGLETON|n=1	1	0	0	GU062229	SH0926075.10FU	1.31874e-108	396.303	214	1	253	308	561	242	242	95.7	98.4	257	k__Fungi	p__Basidiomycota	c__Basidiomycota_cls_Incertae_sedis	o__Basidiomycota_ord_Incertae_sedis	f__Basidiomycota_fam_Incertae_sedis	g__Basidiomycota_gen_Incertae_sedis	s__Basidiomycota_sp
OTU181	SINGLETON|n=1	1	0	0	GU062229	SH0926075.10FU	3.64651e-119	431.39	233	1	255	308	561	248	248	97.3	98.5	259	k__Fungi	p__Basidiomycota	c__Basidiomycota_cls_Incertae_sedis	o__Basidiomycota_ord_Incertae_sedis	f__Basidiomycota_fam_Incertae_sedis	g__Basidiomycota_gen_Incertae_sedis	s__Basidiomycota_sp
OTU182	SINGLETON|n=1	1	0	0	KF360374	SH0737973.10FU	6.04643e-065	250.418	135	1	143	317	459	140	140	97.9	92.3	155	k__Fungi	p__Ascomycota	c__Lecanoromycetes	o__Umbilicariales	f__Elixiaceae	g__Elixia	s__Elixia_sp
OTU183	SINGLETON|n=1	1	0	0	MH101400	SH0940222.10FU	2.31198e-079	298.431	161	1	164	317	480	163	163	99.4	98.8	166	k__Fungi	p__Ascomycota	c__Eurotiomycetes	o__Eurotiales	f__Aspergillaceae	g__Penicillium	s__Penicillium_sanguifluum
OTU184	SINGLETON|n=1	1	0	0	OM280146	SH0752344.10FU	1.43134e-081	305.817	165	1	171	347	517	169	169	98.8	100	171	k__Fungi	p__Ascomycota	c__Eurotiomycetes	o__Eurotiales	f__Thermoascaceae	g__Paecilomyces	s__Paecilomyces_divaricatus
OTU185	SINGLETON|n=1	1	0	0	MN071391	SH1043354.10FU	1.88419e-101	372.297	201	1	222	297	518	215	215	96.8	100	222	k__Fungi	p__Fungi_phy_Incertae_sedis	c__Fungi_cls_Incertae_sedis	o__Fungi_ord_Incertae_sedis	f__Fungi_fam_Incertae_sedis	g__Fungi_gen_Incertae_sedis	s__Fungi_sp
OTU186	SINGLETON|n=1	1	0	0	GU062229	SH0926075.10FU	7.85928e-116	420.31	227	1	254	308	561	245	245	96.5	98.4	258	k__Fungi	p__Basidiomycota	c__Basidiomycota_cls_Incertae_sedis	o__Basidiomycota_ord_Incertae_sedis	f__Basidiomycota_fam_Incertae_sedis	g__Basidiomycota_gen_Incertae_sedis	s__Basidiomycota_sp
OTU187	SINGLETON|n=1	1	0	0	OR069551	SH0767731.10FU	2.94606e-068	261.498	141	1	162	331	493	156	156	96.3	100	162	k__Fungi	p__Ascomycota	c__Eurotiomycetes	o__Eurotiales	f__Aspergillaceae	g__Penicillium	s__Penicillium_corylophilum
OTU188	SINGLETON|n=1	1	0	0	AM901832	SH0934681.10FU	3.16281e-104	381.53	206	1	224	539	762	218	218	97.3	100	224	k__Fungi	p__Basidiomycota	c__Exobasidiomycetes	o__Exobasidiales	f__Exobasidiaceae	g__Exobasidium	s__Exobasidium_sp
OTU189	SINGLETON|n=1	1	0	0	KP791764	SH1015359.10FU	1.98166e-054	215.332	116	3	142	338	477	132	132	94.3	98.6	142	k__Fungi	p__Ascomycota	c__Dothideomycetes	o__Mycosphaerellales	f__Extremaceae	g__Saxophila	s__Saxophila_tyrrhenica
OTU190	SINGLETON|n=1	1	0	0	OR387067	SH0974819.10FU	2.37486e-100	368.604	199	1	217	363	580	212	212	97.7	100	217	k__Fungi	p__Ascomycota	c__Eurotiomycetes	o__Chaetothyriales	f__Herpotrichiellaceae	g__Exophiala	s__Exophiala_dermatitidis
OTU191	SINGLETON|n=1	1	0	0	EU030275	SH0828639.10FU	3.83919e-067	257.805	139	1	160	334	493	153	153	95.6	98.2	163	k__Fungi	p__Ascomycota	c__Eurotiomycetes	o__Chaetothyriales	f__Herpotrichiellaceae	g__Sorocybe	s__Sorocybe_resinae
OTU192	SINGLETON|n=1	1	0	0	UDB03795961	SH0767731.10FU	1.39125e-071	272.578	147	1	165	332	496	159	159	96.4	100	165	k__Fungi	p__Ascomycota	c__Eurotiomycetes	o__Eurotiales	f__Aspergillaceae	g__Penicillium	s__Penicillium_sp
OTU193	SINGLETON|n=1	1	0	0	OR965242	SH0940637.10FU	5.03935e-066	254.111	137	1	143	336	478	141	141	98.6	86.7	165	k__Fungi	p__Ascomycota	c__Eurotiomycetes	o__Eurotiales	f__Aspergillaceae	g__Penicillium	s__Penicillium_sp
OTU194	SINGLETON|n=1	1	0	0	OP315771	SH0871746.10FU	2.54188e-089	331.671	179	1	182	417	598	181	181	99.5	100	182	k__Fungi	p__Ascomycota	c__Sordariomycetes	o__Amphisphaeriales	f__Clypeophysalosporaceae	g__Neophysalospora	s__Neophysalospora_eucalypti
OTU195	SINGLETON|n=1	1	0	0	KM104151	SH0907363.10FU	4.86265e-102	374.144	202	1	205	390	594	204	204	99.5	98.6	208	k__Fungi	p__Fungi_phy_Incertae_sedis	c__Fungi_cls_Incertae_sedis	o__Fungi_ord_Incertae_sedis	f__Fungi_fam_Incertae_sedis	g__Fungi_gen_Incertae_sedis	s__Fungi_sp
OTU196	SINGLETON|n=1	1	0	0	MK782435	SH0905449.10FU	4.93254e-076	287.351	155	1	164	771	935	162	162	98.8	100	164	k__Fungi	p__Ascomycota	c__Leotiomycetes	o__Helotiales	f__Mollisiaceae	g__Phialocephala	s__Phialocephala_fluminis
OTU197	SINGLETON|n=1	1	0	0	UDB06512388	SH0980336.10FU	7.24976e-090	333.517	180	1	186	351	536	184	184	98.9	100	186	k__Fungi	p__Mucoromycota	c__Mucoromycetes	o__Mucorales	f__Rhizopodaceae	g__Rhizopus	s__Rhizopus_sp
OTU198	SINGLETON|n=1	1	0	0	UDB01788742	SH0961637.10FU	6.24317e-080	300.278	162	1	162	351	512	162	162	100	100	162	k__Fungi	p__Ascomycota	c__Eurotiomycetes	o__Chaetothyriales	f__Chaetothyriales_fam_Incertae_sedis	g__Chaetothyriales_gen_Incertae_sedis	s__Chaetothyriales_sp
OTU199	SINGLETON|n=1	1	0	0	UDB01441599	SH0878054.10FU	1.79996e-075	285.504	154	1	166	343	509	163	163	98.2	100	166	k__Fungi	p__Ascomycota	c__Eurotiomycetes	o__Eurotiales	f__Aspergillaceae	g__Aspergillus	s__Aspergillus_sp
OTU200	SINGLETON|n=1	1	0	0	UDB01788746	SH0870926.10FU	8.25389e-074	279.964	151	1	164	344	505	160	160	97.6	100	164	k__Fungi	p__Ascomycota	c__Eurotiomycetes	o__Chaetothyriales	f__Chaetothyriales_fam_Incertae_sedis	g__Chaetothyriales_gen_Incertae_sedis	s__Chaetothyriales_sp
OTU201	SINGLETON|n=1	1	0	0															k_	p_	c_	o_	f_	g_	s_
OTU202	SINGLETON|n=1	1	0	0	MT872624	SH0912804.10FU	3.50044e-067	257.805	139	1	151	578	729	148	148	98	100	151	k__Fungi	p__Ascomycota	c__Eurotiomycetes	o__Eurotiomycetes_ord_Incertae_sedis	f__Eurotiomycetes_fam_Incertae_sedis	g__Eurotiomycetes_gen_Incertae_sedis	s__Eurotiomycetes_sp
OTU203	SINGLETON|n=1	1	0	0	UDB05377383	SH0949870.10FU	5.50415e-092	340.904	184	3	229	300	524	213	213	93.8	99.1	229	k__Fungi	p__Basidiomycota	c__Cystobasidiomycetes	o__Erythrobasidiales	f__Erythrobasidiales_fam_Incertae_sedis	g__Erythrobasidiales_gen_Incertae_sedis	s__Erythrobasidiales_sp
OTU204	SINGLETON|n=1	1	0	0	UDB06914778	SH0946025.10FU	1.23413e-051	206.098	111	1	143	319	464	135	135	94.4	97.9	146	k__Fungi	p__Ascomycota	c__Leotiomycetes	o__Leotiales	f__Tympanidaceae	g__Tympanidaceae_gen_Incertae_sedis	s__Tympanidaceae_sp
OTU205	SINGLETON|n=1	1	0	0	GU062229	SH0926075.10FU	3.68253e-109	398.15	215	1	254	308	561	241	241	94.9	98.4	258	k__Fungi	p__Basidiomycota	c__Basidiomycota_cls_Incertae_sedis	o__Basidiomycota_ord_Incertae_sedis	f__Basidiomycota_fam_Incertae_sedis	g__Basidiomycota_gen_Incertae_sedis	s__Basidiomycota_sp
OTU206	SINGLETON|n=1	1	0	0	MN071391	SH1043354.10FU	8.82854e-095	350.137	189	1	222	297	518	211	211	95	100	222	k__Fungi	p__Fungi_phy_Incertae_sedis	c__Fungi_cls_Incertae_sedis	o__Fungi_ord_Incertae_sedis	f__Fungi_fam_Incertae_sedis	g__Fungi_gen_Incertae_sedis	s__Fungi_sp
OTU207	SINGLETON|n=1	1	0	0															k_	p_	c_	o_	f_	g_	s_
OTU208	SINGLETON|n=1	0	1	0	AF298138	SH1009772.10FU	7.52371e-069	263.345	142	1	151	335	485	149	149	98.7	100	151	k__Fungi	p__Ascomycota	c__Coniocybomycetes	o__Coniocybales	f__Coniocybaceae	g__Chaenotheca	s__Chaenotheca_xyloxena
OTU209	SINGLETON|n=1	0	1	0	AY559329	SH1015359.10FU	2.55919e-048	195.019	105	1	133	322	453	124	124	93.2	94.3	141	k__Fungi	p__Ascomycota	c__Dothideomycetes	o__Mycosphaerellales	f__Extremaceae	g__Saxophila	s__Saxophila_sp
OTU210	SINGLETON|n=1	1	0	0															k_	p_	c_	o_	f_	g_	s_
OTU211	SINGLETON|n=1	0	1	0	OR793058	SH0767731.10FU	8.06979e-069	263.345	142	1	160	362	521	154	154	96.3	100	160	k__Fungi	p__Ascomycota	c__Eurotiomycetes	o__Eurotiales	f__Aspergillaceae	g__Penicillium	s__Penicillium_fundyense
OTU212	SINGLETON|n=1	0	1	0	MT809296	SH0737869.10FU	3.49686e-062	241.185	130	1	150	352	503	145	145	96.7	100	150	k__Fungi	p__Ascomycota	c__Sareomycetes	o__Sareales	f__Sareaceae	g__Sarea	s__Sarea_sp
OTU213	SINGLETON|n=1	0	1	0	OM337573	SH0849718.10FU	8.31249e-069	263.345	142	1	164	538	700	157	157	95.7	100	164	k__Fungi	p__Ascomycota	c__Dothideomycetes	o__Mytilinidiales	f__Mytilinidiaceae	g__Mytilinidion	s__Mytilinidion_resinicola
OTU214	SINGLETON|n=1	0	1	0	OR569668	SH0991327.10FU	2.73027e-073	278.118	150	1	153	356	508	152	152	99.3	100	153	k__Fungi	p__Ascomycota	c__Dothideomycetes	o__Pleosporales	f__Didymosphaeriaceae	g__Pseudopithomyces	s__Pseudopithomyces_chartarum
OTU215	SINGLETON|n=1	0	1	0	MT813950	SH0950131.10FU	1.07469e-057	226.412	122	22	159	235	371	133	133	96.4	85.2	162	k__Fungi	p__Ascomycota	c__Xylonomycetes	o__Symbiotaphrinales	f__Symbiotaphrinaceae	g__Symbiotaphrina	s__Symbiotaphrina_microtheca
OTU216	SINGLETON|n=1	1	0	0															k_	p_	c_	o_	f_	g_	s_
OTU217	SINGLETON|n=1	0	1	0	OR069551	SH0767731.10FU	3.81213e-072	274.424	148	1	163	331	493	158	158	96.9	100	163	k__Fungi	p__Ascomycota	c__Eurotiomycetes	o__Eurotiales	f__Aspergillaceae	g__Penicillium	s__Penicillium_corylophilum
OTU218	SINGLETON|n=1	0	1	0	OR069551	SH0767731.10FU	3.81213e-072	274.424	148	1	163	331	493	158	158	96.9	100	163	k__Fungi	p__Ascomycota	c__Eurotiomycetes	o__Eurotiales	f__Aspergillaceae	g__Penicillium	s__Penicillium_corylophilum
OTU219	SINGLETON|n=1	0	1	0	OR069551	SH0767731.10FU	2.22788e-074	281.811	152	1	160	331	493	160	160	100	100	160	k__Fungi	p__Ascomycota	c__Eurotiomycetes	o__Eurotiales	f__Aspergillaceae	g__Penicillium	s__Penicillium_corylophilum
OTU220	SINGLETON|n=1	0	1	0	KJ406887	SH0767731.10FU	4.82453e-076	287.351	155	1	161	266	427	160	160	99.4	100	161	k__Fungi	p__Ascomycota	c__Eurotiomycetes	o__Eurotiales	f__Aspergillaceae	g__Penicillium	s__Penicillium_sp
OTU221	SINGLETON|n=1	1	0	0	KU582217	SH0767731.10FU	4.71069e-066	254.111	137	1	156	376	535	153	153	98.1	100	156	k__Fungi	p__Ascomycota	c__Eurotiomycetes	o__Eurotiales	f__Aspergillaceae	g__Penicillium	s__Penicillium_sp
OTU222	SINGLETON|n=1	1	0	0	MK163843	SH0881750.10FU	2.55325e-068	261.498	141	1	144	325	468	143	143	99.3	100	144	k__Fungi	p__Ascomycota	c__Leotiomycetes	o__Thelebolales	f__Pseudeurotiaceae	g__Pseudeurotium	s__Pseudeurotium_sp
OTU223	SINGLETON|n=1	0	1	0	MK801333	SH0974827.10FU	1.08877e-078	296.584	160	1	209	415	634	202	202	96.7	100	209	k__Fungi	p__Ascomycota	c__Eurotiomycetes	o__Chaetothyriales	f__Chaetothyriales_fam_Incertae_sedis	g__Chaetothyriales_gen_Incertae_sedis	s__Chaetothyriales_sp
OTU224	SINGLETON|n=1	1	0	0	MT872626	SH0912803.10FU	9.80163e-063	243.031	131	1	151	1577	1729	146	146	96.7	100	151	k__Fungi	p__Ascomycota	c__Eurotiomycetes	o__Eurotiomycetes_ord_Incertae_sedis	f__Eurotiomycetes_fam_Incertae_sedis	g__Eurotiomycetes_gen_Incertae_sedis	s__Eurotiomycetes_sp
OTU225	SINGLETON|n=1	0	1	0	OR676955	SH0939544.10FU	1.74869e-080	302.124	163	1	163	316	478	163	163	100	100	163	k__Fungi	p__Ascomycota	c__Eurotiomycetes	o__Eurotiales	f__Aspergillaceae	g__Penicillium	s__Penicillium_buchwaldii
OTU226	SINGLETON|n=1	0	1	0	EU030275	SH0828639.10FU	8.3104e-064	246.725	133	1	160	334	493	151	151	94.4	98.2	163	k__Fungi	p__Ascomycota	c__Eurotiomycetes	o__Chaetothyriales	f__Herpotrichiellaceae	g__Sorocybe	s__Sorocybe_resinae
OTU227	SINGLETON|n=1	0	1	0	UDB01788746	SH0870926.10FU	6.33407e-075	283.658	153	1	163	344	505	160	160	98.2	100	163	k__Fungi	p__Ascomycota	c__Eurotiomycetes	o__Chaetothyriales	f__Chaetothyriales_fam_Incertae_sedis	g__Chaetothyriales_gen_Incertae_sedis	s__Chaetothyriales_sp
OTU228	SINGLETON|n=1	0	1	0	FJ235127	SH0892767.10FU	9.85002e-089	329.824	178	1	193	407	599	188	188	97.4	99.5	194	k__Fungi	p__Ascomycota	c__Saccharomycetes	o__Saccharomycetales	f__Saccharomycetales_fam_Incertae_sedis	g__Candida	s__Candida_keroseneae
OTU229	SINGLETON|n=1	0	1	0															k_	p_	c_	o_	f_	g_	s_
OTU230	SINGLETON|n=1	0	1	0	EU030275	SH0828639.10FU	1.7862e-065	252.265	136	1	160	334	493	152	152	95	98.2	163	k__Fungi	p__Ascomycota	c__Eurotiomycetes	o__Chaetothyriales	f__Herpotrichiellaceae	g__Sorocybe	s__Sorocybe_resinae
OTU231	SINGLETON|n=1	0	1	0	EU030275	SH0828639.10FU	6.32985e-065	250.418	135	1	158	334	493	152	152	96.2	98.1	161	k__Fungi	p__Ascomycota	c__Eurotiomycetes	o__Chaetothyriales	f__Herpotrichiellaceae	g__Sorocybe	s__Sorocybe_resinae
OTU232	SINGLETON|n=1	0	1	0	EU030275	SH0828639.10FU	8.25181e-069	263.345	142	1	160	334	493	154	154	96.3	98.2	163	k__Fungi	p__Ascomycota	c__Eurotiomycetes	o__Chaetothyriales	f__Herpotrichiellaceae	g__Sorocybe	s__Sorocybe_resinae
OTU233	SINGLETON|n=1	0	1	0	OR387067	SH0974819.10FU	4.03673e-098	361.217	195	1	220	363	580	212	212	96.4	100	220	k__Fungi	p__Ascomycota	c__Eurotiomycetes	o__Chaetothyriales	f__Herpotrichiellaceae	g__Exophiala	s__Exophiala_dermatitidis
OTU234	SINGLETON|n=1	1	0	0	MT872626	SH0912803.10FU	2.10672e-064	248.571	134	1	151	1577	1729	147	147	97.4	100	151	k__Fungi	p__Ascomycota	c__Eurotiomycetes	o__Eurotiomycetes_ord_Incertae_sedis	f__Eurotiomycetes_fam_Incertae_sedis	g__Eurotiomycetes_gen_Incertae_sedis	s__Eurotiomycetes_sp
OTU235	SINGLETON|n=1	0	1	0	OR387067	SH0974819.10FU	2.94403e-079	298.431	161	1	173	363	536	170	170	98.3	84.8	204	k__Fungi	p__Ascomycota	c__Eurotiomycetes	o__Chaetothyriales	f__Herpotrichiellaceae	g__Exophiala	s__Exophiala_dermatitidis
OTU236	SINGLETON|n=1	0	1	0	OR387067	SH0974819.10FU	1.44434e-097	359.37	194	1	219	363	580	211	211	96.3	100	219	k__Fungi	p__Ascomycota	c__Eurotiomycetes	o__Chaetothyriales	f__Herpotrichiellaceae	g__Exophiala	s__Exophiala_dermatitidis
OTU237	SINGLETON|n=1	0	1	0	OR387067	SH0974819.10FU	1.44434e-097	359.37	194	1	219	363	580	211	211	96.3	100	219	k__Fungi	p__Ascomycota	c__Eurotiomycetes	o__Chaetothyriales	f__Herpotrichiellaceae	g__Exophiala	s__Exophiala_dermatitidis
OTU238	SINGLETON|n=1	0	1	0	UDB02013834	SH0904555.10FU	2.19872e-080	302.124	163	1	195	361	557	187	187	95.9	98.5	198	k__Fungi	p__Ascomycota	c__Eurotiomycetes	o__Chaetothyriales	f__Herpotrichiellaceae	g__Exophiala	s__Exophiala_sp
OTU239	SINGLETON|n=1	1	0	0	EU030275	SH0828639.10FU	1.7862e-065	252.265	136	1	160	334	493	152	152	95	98.2	163	k__Fungi	p__Ascomycota	c__Eurotiomycetes	o__Chaetothyriales	f__Herpotrichiellaceae	g__Sorocybe	s__Sorocybe_resinae
OTU240	SINGLETON|n=1	0	1	0	KT264384	SH0904651.10FU	4.6153e-082	307.664	166	1	194	387	578	185	185	95.4	100	194	k__Fungi	p__Ascomycota	c__Eurotiomycetes	o__Chaetothyriales	f__Herpotrichiellaceae	g__Exophiala	s__Exophiala_sp
OTU241	SINGLETON|n=1	0	1	0	UDB03470178	SH0966890.10FU	7.15966e-069	263.345	142	1	145	319	463	144	144	99.3	100	145	k__Fungi	p__Ascomycota	c__Leotiomycetes	o__Helotiales	f__Hyaloscyphaceae	g__Hyaloscypha	s__Hyaloscypha_sp
OTU242	SINGLETON|n=1	0	1	0	EU030275	SH0828639.10FU	3.18688e-028	128.539	69	56	145	387	476	83	83	92.2	54.5	165	k__Fungi	p__Ascomycota	c__Eurotiomycetes	o__Chaetothyriales	f__Herpotrichiellaceae	g__Sorocybe	s__Sorocybe_resinae
OTU243	SINGLETON|n=1	0	1	0	MT872624	SH0912804.10FU	1.68551e-035	152.546	82	1	115	578	693	105	105	91.3	76.7	150	k__Fungi	p__Ascomycota	c__Eurotiomycetes	o__Eurotiomycetes_ord_Incertae_sedis	f__Eurotiomycetes_fam_Incertae_sedis	g__Eurotiomycetes_gen_Incertae_sedis	s__Eurotiomycetes_sp
OTU244	SINGLETON|n=1	1	0	0															k_	p_	c_	o_	f_	g_	s_
OTU245	SINGLETON|n=1	0	1	0	MT872624	SH0912804.10FU	1.68551e-035	152.546	82	1	115	578	693	105	105	91.3	76.7	150	k__Fungi	p__Ascomycota	c__Eurotiomycetes	o__Eurotiomycetes_ord_Incertae_sedis	f__Eurotiomycetes_fam_Incertae_sedis	g__Eurotiomycetes_gen_Incertae_sedis	s__Eurotiomycetes_sp
OTU246	SINGLETON|n=1	0	1	0	UDB07379847	SH0745609.10FU	1.91888e-106	388.917	210	3	227	454	678	220	220	97.8	99.1	227	k__Fungi	p__Chytridiomycota	c__Spizellomycetes	o__Spizellomycetales	f__Spizellomycetaceae	g__Spizellomycetaceae_gen_Incertae_sedis	s__Spizellomycetaceae_sp
OTU247	SINGLETON|n=1	1	0	0	MT872624	SH0912804.10FU	1.68724e-040	169.165	91	1	125	578	701	114	114	91.2	82.8	151	k__Fungi	p__Ascomycota	c__Eurotiomycetes	o__Eurotiomycetes_ord_Incertae_sedis	f__Eurotiomycetes_fam_Incertae_sedis	g__Eurotiomycetes_gen_Incertae_sedis	s__Eurotiomycetes_sp
OTU248	SINGLETON|n=1	1	0	0	OR965240	SH0939544.10FU	2.88195e-073	278.118	150	1	159	346	505	157	157	98.7	99.4	160	k__Fungi	p__Ascomycota	c__Eurotiomycetes	o__Eurotiales	f__Aspergillaceae	g__Penicillium	s__Penicillium_sp
OTU249	SINGLETON|n=1	1	0	0	FJ028703	SH0763640.10FU	3.55986e-072	274.424	148	1	154	326	479	152	152	98.7	100	154	k__Fungi	p__Ascomycota	c__Dothideomycetes	o__Capnodiales	f__Capnodiales_fam_Incertae_sedis	g__Capnodiales_gen_Incertae_sedis	s__Capnodiales_sp
OTU250	SINGLETON|n=1	1	0	0	OR752067	SH0940075.10FU	2.99029e-073	278.118	150	1	165	364	528	160	160	97	100	165	k__Fungi	p__Ascomycota	c__Eurotiomycetes	o__Eurotiales	f__Aspergillaceae	g__Aspergillus	s__Aspergillus_fumigatus
OTU251	SINGLETON|n=1	1	0	0	MH535871	SH0912800.10FU	7.47067e-074	279.964	151	1	151	606	756	151	151	100	100	151	k__Fungi	p__Ascomycota	c__Dothideomycetes	o__Hysteriales	f__Hysteriaceae	g__Gloniopsis	s__Gloniopsis_subrugosa
OTU252	SINGLETON|n=1	0	1	0	GU062229	SH0926075.10FU	7.8933e-116	420.31	227	1	255	308	561	246	246	96.5	98.5	259	k__Fungi	p__Basidiomycota	c__Basidiomycota_cls_Incertae_sedis	o__Basidiomycota_ord_Incertae_sedis	f__Basidiomycota_fam_Incertae_sedis	g__Basidiomycota_gen_Incertae_sedis	s__Basidiomycota_sp
OTU253	SINGLETON|n=1	0	1	0	MG471105	SH0877584.10FU	2.37351e-070	268.884	145	1	209	335	541	188	188	90	100	209	k__Fungi	p__Basidiomycota	c__Microbotryomycetes	o__Sporidiobolales	f__Sporidiobolaceae	g__Rhodosporidiobolus	s__Rhodosporidiobolus_sp
OTU254	SINGLETON|n=1	1	0	0	LC639279	SH0946103.10FU	1.93347e-059	231.952	125	1	140	370	509	135	135	96.4	100	140	k__Fungi	p__Ascomycota	c__Leotiomycetes	o__Helotiales	f__Myxotrichaceae	g__Oidiodendron	s__Oidiodendron_griseum
OTU255	SINGLETON|n=1	0	1	0	MT872624	SH0912804.10FU	3.62277e-037	158.086	85	1	150	578	729	130	130	86.7	100	150	k__Fungi	p__Ascomycota	c__Eurotiomycetes	o__Eurotiomycetes_ord_Incertae_sedis	f__Eurotiomycetes_fam_Incertae_sedis	g__Eurotiomycetes_gen_Incertae_sedis	s__Eurotiomycetes_sp
OTU256	SINGLETON|n=1	0	1	0	OR905871	SH0877593.10FU	2.3415e-110	401.843	217	1	217	349	565	217	217	100	100	217	k__Fungi	p__Basidiomycota	c__Microbotryomycetes	o__Sporidiobolales	f__Sporidiobolaceae	g__Rhodotorula	s__Rhodotorula_mucilaginosa
OTU257	SINGLETON|n=1	1	0	0	OK584507	SH1012176.10FU	7.21049e-064	246.725	133	1	145	381	525	141	141	97.2	100	145	k__Fungi	p__Ascomycota	c__Leotiomycetes	o__Helotiales	f__Helotiales_fam_Incertae_sedis	g__Infundichalara	s__Infundichalara_sp
OTU258	SINGLETON|n=1	0	1	0	GU062229	SH0926075.10FU	1.7086e-112	409.23	221	1	255	308	561	244	244	95.7	98.5	259	k__Fungi	p__Basidiomycota	c__Basidiomycota_cls_Incertae_sedis	o__Basidiomycota_ord_Incertae_sedis	f__Basidiomycota_fam_Incertae_sedis	g__Basidiomycota_gen_Incertae_sedis	s__Basidiomycota_sp
OTU259	SINGLETON|n=1	0	1	0	OR069614	SH1024970.10FU	9.55511e-089	329.824	178	3	189	351	537	184	184	98.4	98.9	189	k__Fungi	p__Ascomycota	c__Dothideomycetes	o__Dothideales	f__Saccotheciaceae	g__Aureobasidium	s__Aureobasidium_sp
OTU260	SINGLETON|n=1	0	1	0	GU062229	SH0926075.10FU	7.85928e-116	420.31	227	1	254	308	561	245	245	96.5	98.4	258	k__Fungi	p__Basidiomycota	c__Basidiomycota_cls_Incertae_sedis	o__Basidiomycota_ord_Incertae_sedis	f__Basidiomycota_fam_Incertae_sedis	g__Basidiomycota_gen_Incertae_sedis	s__Basidiomycota_sp
OTU261	SINGLETON|n=1	0	1	0	GU062229	SH0926075.10FU	4.73739e-118	427.696	231	1	256	307	561	248	248	96.9	98.5	260	k__Fungi	p__Basidiomycota	c__Basidiomycota_cls_Incertae_sedis	o__Basidiomycota_ord_Incertae_sedis	f__Basidiomycota_fam_Incertae_sedis	g__Basidiomycota_gen_Incertae_sedis	s__Basidiomycota_sp
OTU262	SINGLETON|n=1	0	1	0	GU062229	SH0926075.10FU	7.85928e-116	420.31	227	1	254	308	561	245	245	96.5	98.4	258	k__Fungi	p__Basidiomycota	c__Basidiomycota_cls_Incertae_sedis	o__Basidiomycota_ord_Incertae_sedis	f__Basidiomycota_fam_Incertae_sedis	g__Basidiomycota_gen_Incertae_sedis	s__Basidiomycota_sp
OTU263	SINGLETON|n=1	0	1	0	GU062229	SH0926075.10FU	2.15679e-116	422.156	228	1	251	308	561	246	246	98	98.4	255	k__Fungi	p__Basidiomycota	c__Basidiomycota_cls_Incertae_sedis	o__Basidiomycota_ord_Incertae_sedis	f__Basidiomycota_fam_Incertae_sedis	g__Basidiomycota_gen_Incertae_sedis	s__Basidiomycota_sp
OTU264	SINGLETON|n=1	0	1	0	GU062229	SH0926075.10FU	8.00578e-106	387.07	209	1	255	308	561	240	240	94.1	98.5	259	k__Fungi	p__Basidiomycota	c__Basidiomycota_cls_Incertae_sedis	o__Basidiomycota_ord_Incertae_sedis	f__Basidiomycota_fam_Incertae_sedis	g__Basidiomycota_gen_Incertae_sedis	s__Basidiomycota_sp
OTU265	SINGLETON|n=1	0	1	0	GU062229	SH0926075.10FU	3.64651e-119	431.39	233	1	255	308	561	248	248	97.3	98.5	259	k__Fungi	p__Basidiomycota	c__Basidiomycota_cls_Incertae_sedis	o__Basidiomycota_ord_Incertae_sedis	f__Basidiomycota_fam_Incertae_sedis	g__Basidiomycota_gen_Incertae_sedis	s__Basidiomycota_sp
OTU266	SINGLETON|n=1	0	1	0	GU062229	SH0926075.10FU	1.69655e-117	425.85	230	1	255	308	561	247	247	96.9	98.5	259	k__Fungi	p__Basidiomycota	c__Basidiomycota_cls_Incertae_sedis	o__Basidiomycota_ord_Incertae_sedis	f__Basidiomycota_fam_Incertae_sedis	g__Basidiomycota_gen_Incertae_sedis	s__Basidiomycota_sp
OTU267	SINGLETON|n=1	0	1	0	GU062229	SH0926075.10FU	7.85928e-116	420.31	227	1	254	308	561	245	245	96.5	98.4	258	k__Fungi	p__Basidiomycota	c__Basidiomycota_cls_Incertae_sedis	o__Basidiomycota_ord_Incertae_sedis	f__Basidiomycota_fam_Incertae_sedis	g__Basidiomycota_gen_Incertae_sedis	s__Basidiomycota_sp
OTU268	SINGLETON|n=1	0	1	0	GU062229	SH0926075.10FU	1.7086e-112	409.23	221	1	255	308	561	244	244	95.7	98.5	259	k__Fungi	p__Basidiomycota	c__Basidiomycota_cls_Incertae_sedis	o__Basidiomycota_ord_Incertae_sedis	f__Basidiomycota_fam_Incertae_sedis	g__Basidiomycota_gen_Incertae_sedis	s__Basidiomycota_sp
OTU269	SINGLETON|n=1	0	1	0	OQ346259	SH1003957.10FU	2.18737e-100	368.604	199	1	202	435	636	201	201	99.5	100	202	k__Fungi	p__Basidiomycota	c__Agaricomycetes	o__Agaricales	f__Psathyrellaceae	g__Coprinellus	s__Coprinellus_radians
OTU270	SINGLETON|n=1	0	1	0	KJ706356	SH0946266.10FU	3.73829e-103	377.837	204	1	207	366	572	206	206	99.5	100	207	k__Fungi	p__Basidiomycota	c__Microbotryomycetes	o__Microbotryomycetes_ord_Incertae_sedis	f__Chrysozymaceae	g__Hamamotoa	s__Hamamotoa_singularis
OTU271	SINGLETON|n=1	0	1	0	AB520305	SH0844758.10FU	6.70802e-071	270.731	146	1	209	318	527	191	191	91.4	98.6	212	k__Fungi	p__Basidiomycota	c__Microbotryomycetes	o__Sporidiobolales	f__Sporidiobolaceae	g__Sporobolomyces	s__Sporobolomyces_sp
OTU272	SINGLETON|n=1	0	1	0	GU062229	SH0926075.10FU	3.64651e-119	431.39	233	1	255	308	561	248	248	97.3	98.5	259	k__Fungi	p__Basidiomycota	c__Basidiomycota_cls_Incertae_sedis	o__Basidiomycota_ord_Incertae_sedis	f__Basidiomycota_fam_Incertae_sedis	g__Basidiomycota_gen_Incertae_sedis	s__Basidiomycota_sp
OTU273	SINGLETON|n=1	0	1	0	UDB03609281	SH1012176.10FU	5.52681e-065	250.418	135	1	144	317	460	141	141	97.9	100	144	k__Fungi	p__Ascomycota	c__Leotiomycetes	o__Helotiales	f__Helotiales_fam_Incertae_sedis	g__Infundichalara	s__Infundichalara_sp
OTU274	SINGLETON|n=1	0	1	0	MT872626	SH0912803.10FU	2.72522e-063	244.878	132	1	150	1577	1726	145	145	96.7	99.3	151	k__Fungi	p__Ascomycota	c__Eurotiomycetes	o__Eurotiomycetes_ord_Incertae_sedis	f__Eurotiomycetes_fam_Incertae_sedis	g__Eurotiomycetes_gen_Incertae_sedis	s__Eurotiomycetes_sp
OTU275	SINGLETON|n=1	0	1	0	UDB07491230	SH1012233.10FU	7.15966e-069	263.345	142	1	145	315	459	144	144	99.3	100	145	k__Fungi	p__Ascomycota	c__Leotiomycetes	o__Helotiales	f__Dermateaceae	g__Xenochalara	s__Xenochalara_sp
OTU276	SINGLETON|n=1	0	1	0	KM104110	SH0967380.10FU	2.17301e-059	231.952	125	1	154	366	521	146	146	94.8	100	154	k__Fungi	p__Fungi_phy_Incertae_sedis	c__Fungi_cls_Incertae_sedis	o__Fungi_ord_Incertae_sedis	f__Fungi_fam_Incertae_sedis	g__Fungi_gen_Incertae_sedis	s__Fungi_sp
OTU277	SINGLETON|n=1	0	1	0															k_	p_	c_	o_	f_	g_	s_
OTU278	SINGLETON|n=1	0	1	0	KY102575	SH0733981.10FU	6.82596e-051	204.252	110	65	210	413	558	134	134	91.8	69.5	210	k__Fungi	p__Basidiomycota	c__Microbotryomycetes	o__Microbotryomycetes_ord_Incertae_sedis	f__Colacogloeaceae	g__Colacogloea	s__Colacogloea_philyla
OTU279	SINGLETON|n=1	0	1	0	UDB02410273	SH0971208.10FU	3.47559e-093	344.597	186	1	192	317	508	190	190	99	100	192	k__Fungi	p__Basidiomycota	c__Agaricomycetes	o__Cantharellales	f__Oliveoniaceae	g__Oliveonia	s__Oliveonia_sp
OTU280	SINGLETON|n=1	0	1	0	MH188916	SH0926074.10FU	9.37408e-105	383.377	207	1	237	347	584	229	229	96.6	100	237	k__Fungi	p__Basidiomycota	c__Exobasidiomycetes	o__Exobasidiales	f__Exobasidiales_fam_Incertae_sedis	g__Guomyces	s__Guomyces_nicotianae
OTU281	SINGLETON|n=1	0	1	0	MH188916	SH0926074.10FU	5.66861e-102	374.144	202	1	238	347	584	227	227	95.4	100	238	k__Fungi	p__Basidiomycota	c__Exobasidiomycetes	o__Exobasidiales	f__Exobasidiales_fam_Incertae_sedis	g__Guomyces	s__Guomyces_nicotianae
OTU282	SINGLETON|n=1	0	1	0	GU062229	SH0926075.10FU	1.72073e-107	392.61	212	1	255	308	561	241	241	94.5	98.5	259	k__Fungi	p__Basidiomycota	c__Basidiomycota_cls_Incertae_sedis	o__Basidiomycota_ord_Incertae_sedis	f__Basidiomycota_fam_Incertae_sedis	g__Basidiomycota_gen_Incertae_sedis	s__Basidiomycota_sp
OTU283	SINGLETON|n=1	0	1	0	MH188916	SH0926074.10FU	2.61876e-105	385.223	208	1	238	347	584	229	229	96.2	100	238	k__Fungi	p__Basidiomycota	c__Exobasidiomycetes	o__Exobasidiales	f__Exobasidiales_fam_Incertae_sedis	g__Guomyces	s__Guomyces_nicotianae
OTU284	SINGLETON|n=1	0	0	1	UDB07674985	SH1012176.10FU	5.60557e-055	217.178	117	1	144	315	458	135	135	93.8	100	144	k__Fungi	p__Ascomycota	c__Leotiomycetes	o__Helotiales	f__Pezizellaceae	g__Ciliolarina	s__Ciliolarina_sp
OTU285	SINGLETON|n=1	0	1	0	UDB03866722	SH0939722.10FU	2.99029e-073	278.118	150	1	165	337	501	161	161	97.6	100	165	k__Fungi	p__Ascomycota	c__Eurotiomycetes	o__Eurotiales	f__Aspergillaceae	g__Penicillium	s__Penicillium_sp
OTU286	SINGLETON|n=1	0	0	1	UDB04121108	SH0905534.10FU	6.99324e-060	233.798	126	1	174	367	535	160	160	92	100	174	k__Fungi	p__Ascomycota	c__Dothideomycetes	o__Coniosporiales	f__Coniosporiaceae	g__Coniosporium	s__Coniosporium_sp
OTU287	SINGLETON|n=1	0	0	1	MZ133732	SH0875505.10FU	6.41738e-050	200.558	108	4	160	424	584	144	144	91.7	98.1	160	k__Fungi	p__Ascomycota	c__Eurotiomycetes	o__Onygenales	f__Gymnoascaceae	g__Gymnoascus	s__Gymnoascus_halophilus
OTU288	SINGLETON|n=1	1	0	0	MH188916	SH0926074.10FU	2.61876e-105	385.223	208	1	238	347	584	229	229	96.2	100	238	k__Fungi	p__Basidiomycota	c__Exobasidiomycetes	o__Exobasidiales	f__Exobasidiales_fam_Incertae_sedis	g__Guomyces	s__Guomyces_nicotianae
OTU289	SINGLETON|n=1	0	0	1	UDB07499237	SH1012135.10FU	7.21049e-064	246.725	133	1	142	317	458	139	139	97.9	97.9	145	k__Fungi	p__Ascomycota	c__Leotiomycetes	o__Helotiales	f__Pezizellaceae	g__Xenopolyscytalum	s__Xenopolyscytalum_sp
OTU290	SINGLETON|n=1	0	0	1	MN862667	SH0868842.10FU	6.33214e-070	267.038	144	1	162	415	576	156	156	96.3	100	162	k__Fungi	p__Ascomycota	c__Ascomycota_cls_Incertae_sedis	o__Ascomycota_ord_Incertae_sedis	f__Ascomycota_fam_Incertae_sedis	g__Ascomycota_gen_Incertae_sedis	s__Ascomycota_sp
OTU291	SINGLETON|n=1	0	0	1	OM337573	SH0849718.10FU	1.76111e-075	285.504	154	1	163	538	700	160	160	98.2	100	163	k__Fungi	p__Ascomycota	c__Dothideomycetes	o__Mytilinidiales	f__Mytilinidiaceae	g__Mytilinidion	s__Mytilinidion_resinicola
OTU292	SINGLETON|n=1	0	0	1	OR415647	SH0740357.10FU	2.22881e-079	298.431	161	1	161	393	553	161	161	100	100	161	k__Fungi	p__Ascomycota	c__Sordariomycetes	o__Hypocreales	f__Cordycipitaceae	g__Akanthomyces	s__Akanthomyces_lecanii
OTU293	SINGLETON|n=1	1	0	0	UDB02024784	SH0763677.10FU	7.21049e-064	246.725	133	1	136	322	457	135	135	99.3	93.8	145	k__Fungi	p__Ascomycota	c__Dothideomycetes	o__Mycosphaerellales	f__Neodevriesiaceae	g__Neodevriesia	s__Neodevriesia_sp
OTU294	SINGLETON|n=1	0	0	1	OR069551	SH0767731.10FU	3.81213e-072	274.424	148	1	163	331	493	158	158	96.9	100	163	k__Fungi	p__Ascomycota	c__Eurotiomycetes	o__Eurotiales	f__Aspergillaceae	g__Penicillium	s__Penicillium_corylophilum
OTU295	SINGLETON|n=1	0	0	1	OR069551	SH0767731.10FU	1.38117e-071	272.578	147	1	162	331	492	157	157	96.9	98.8	164	k__Fungi	p__Ascomycota	c__Eurotiomycetes	o__Eurotiales	f__Aspergillaceae	g__Penicillium	s__Penicillium_corylophilum
OTU296	SINGLETON|n=1	0	0	1	UDB04100206	SH0939722.10FU	4.9313e-071	270.731	146	1	158	335	492	155	155	98.1	96.9	163	k__Fungi	p__Ascomycota	c__Eurotiomycetes	o__Eurotiales	f__Aspergillaceae	g__Penicillium	s__Penicillium_sp
OTU297	SINGLETON|n=1	0	0	1	OR752067	SH0940075.10FU	1.05991e-072	276.271	149	1	163	364	528	160	160	98.2	100	163	k__Fungi	p__Ascomycota	c__Eurotiomycetes	o__Eurotiales	f__Aspergillaceae	g__Aspergillus	s__Aspergillus_fumigatus
OTU298	SINGLETON|n=1	0	0	1	OR827162	SH0740100.10FU	3.72804e-072	274.424	148	1	160	364	523	156	156	97.5	100	160	k__Fungi	p__Ascomycota	c__Sordariomycetes	o__Hypocreales	f__Cordycipitaceae	g__Beauveria	s__Beauveria_pseudobassiana
OTU299	SINGLETON|n=1	0	0	1	OP346766	SH0940202.10FU	6.38191e-080	300.278	162	1	165	478	642	164	164	99.4	100	165	k__Fungi	p__Ascomycota	c__Eurotiomycetes	o__Eurotiales	f__Aspergillaceae	g__Penicillium	s__Penicillium_cosmopolitanum
OTU300	SINGLETON|n=1	0	0	1	OQ600167	SH0897344.10FU	2.00752e-069	265.191	143	1	146	335	480	145	145	99.3	100	146	k__Fungi	p__Ascomycota	c__Leotiomycetes	o__Thelebolales	f__Pseudeurotiaceae	g__Beskidomyces	s__Beskidomyces_laricis
OTU301	SINGLETON|n=1	1	0	0	EU030275	SH0828639.10FU	1.7862e-065	252.265	136	1	160	334	493	152	152	95	98.2	163	k__Fungi	p__Ascomycota	c__Eurotiomycetes	o__Chaetothyriales	f__Herpotrichiellaceae	g__Sorocybe	s__Sorocybe_resinae
OTU302	SINGLETON|n=1	0	0	1	OK584507	SH1012176.10FU	1.19634e-061	239.338	129	1	144	381	525	140	140	97.2	100	144	k__Fungi	p__Ascomycota	c__Leotiomycetes	o__Helotiales	f__Helotiales_fam_Incertae_sedis	g__Infundichalara	s__Infundichalara_sp
OTU303	SINGLETON|n=1	0	0	1	LC646545	SH0946018.10FU	1.15544e-061	239.338	129	1	135	344	478	133	133	98.5	96.4	140	k__Fungi	p__Ascomycota	c__Leotiomycetes	o__Helotiales	f__Amorphothecaceae	g__Amorphotheca	s__Amorphotheca_resinae
OTU304	SINGLETON|n=1	0	0	1	UDB05247480	SH0740742.10FU	1.28467e-046	189.479	102	1	150	347	497	135	135	90	100	150	k__Fungi	p__Ascomycota	c__Dothideomycetes	o__Dothideales	f__Dothideales_fam_Incertae_sedis	g__Pringsheimia	s__Pringsheimia_sp
OTU305	SINGLETON|n=1	0	0	1	AJ972856	SH0983459.10FU	6.97763e-069	263.345	142	1	142	2039	2180	142	142	100	100	142	k__Fungi	p__Ascomycota	c__Dothideomycetes	o__Mycosphaerellales	f__Extremaceae	g__Extremaceae_gen_Incertae_sedis	s__Extremaceae_sp
OTU306	SINGLETON|n=1	0	0	1	UDB05114722	SH0950072.10FU	2.55325e-068	261.498	141	1	144	310	453	143	143	99.3	100	144	k__Fungi	p__Ascomycota	c__Dothideomycetes	o__Mycosphaerellales	f__Teratosphaeriaceae	g__Devriesia	s__Devriesia_sp
OTU307	SINGLETON|n=1	0	0	1	KU580197	SH1015351.10FU	4.30282e-061	237.491	128	1	144	358	499	139	139	96.5	100	144	k__Fungi	p__Fungi_phy_Incertae_sedis	c__Fungi_cls_Incertae_sedis	o__Fungi_ord_Incertae_sedis	f__Fungi_fam_Incertae_sedis	g__Fungi_gen_Incertae_sedis	s__Fungi_sp
OTU308	SINGLETON|n=1	1	0	0	GU062229	SH0926075.10FU	1.31874e-108	396.303	214	1	253	308	561	242	242	95.7	98.4	257	k__Fungi	p__Basidiomycota	c__Basidiomycota_cls_Incertae_sedis	o__Basidiomycota_ord_Incertae_sedis	f__Basidiomycota_fam_Incertae_sedis	g__Basidiomycota_gen_Incertae_sedis	s__Basidiomycota_sp
OTU309	SINGLETON|n=1	0	0	1	OR752063	SH0856613.10FU	1.01375e-077	292.891	158	1	158	368	525	158	158	100	100	158	k__Fungi	p__Ascomycota	c__Dothideomycetes	o__Pleosporales	f__Pleosporaceae	g__Alternaria	s__Alternaria_infectoria
OTU310	SINGLETON|n=1	0	0	1	FJ235127	SH0892767.10FU	2.75812e-084	315.051	170	1	194	407	600	186	186	95.9	100	194	k__Fungi	p__Ascomycota	c__Saccharomycetes	o__Saccharomycetales	f__Saccharomycetales_fam_Incertae_sedis	g__Candida	s__Candida_keroseneae
OTU311	SINGLETON|n=1	0	0	1	KF360402	SH0737922.10FU	1.67984e-060	235.645	127	1	142	332	473	137	137	96.5	92.2	154	k__Fungi	p__Ascomycota	c__Lecanoromycetes	o__Umbilicariales	f__Umbilicariaceae	g__Fulgidea	s__Fulgidea_sierrae
OTU312	SINGLETON|n=1	0	0	1	EU030275	SH0828639.10FU	1.7862e-065	252.265	136	1	160	334	493	152	152	95	98.2	163	k__Fungi	p__Ascomycota	c__Eurotiomycetes	o__Chaetothyriales	f__Herpotrichiellaceae	g__Sorocybe	s__Sorocybe_resinae
OTU313	SINGLETON|n=1	0	0	1	UDB07674985	SH1012176.10FU	2.57138e-063	244.878	132	1	144	315	458	140	140	97.2	100	144	k__Fungi	p__Ascomycota	c__Leotiomycetes	o__Helotiales	f__Pezizellaceae	g__Ciliolarina	s__Ciliolarina_sp
OTU314	SINGLETON|n=1	0	0	1	KF156038	SH0735104.10FU	1.0027e-088	329.824	178	1	178	447	624	178	178	100	90.4	197	k__Fungi	p__Ascomycota	c__Dothideomycetes	o__Venturiales	f__Sympoventuriaceae	g__Ochroconis	s__Ochroconis_longiphorum
OTU315	SINGLETON|n=1	0	0	1	MZ573462	SH0735889.10FU	6.66009e-075	283.658	153	1	170	446	618	167	167	98.2	100	170	k__Fungi	p__Ascomycota	c__Dothideomycetes	o__Venturiales	f__Sympoventuriaceae	g__Ochroconis	s__Ochroconis_sp
OTU316	SINGLETON|n=1	0	0	1	OR913034	SH0995683.10FU	6.24317e-080	300.278	162	1	162	373	534	162	162	100	100	162	k__Fungi	p__Ascomycota	c__Sordariomycetes	o__Xylariales	f__Graphostromataceae	g__Biscogniauxia	s__Biscogniauxia_mediterranea
OTU317	SINGLETON|n=1	0	0	1	OQ526191	SH1020519.10FU	1.75527e-040	169.165	91	3	144	372	514	127	127	89.4	91	156	k__Fungi	p__Ascomycota	c__Dothideomycetes	o__Dothideomycetes_ord_Incertae_sedis	f__Dothideomycetes_fam_Incertae_sedis	g__Dothideomycetes_gen_Incertae_sedis	s__Dothideomycetes_sp
OTU318	SINGLETON|n=1	0	0	1	EU030275	SH0828639.10FU	1.7862e-065	252.265	136	1	160	334	493	152	152	95	98.2	163	k__Fungi	p__Ascomycota	c__Eurotiomycetes	o__Chaetothyriales	f__Herpotrichiellaceae	g__Sorocybe	s__Sorocybe_resinae
OTU319	SINGLETON|n=1	0	0	1	OR623243	SH0958738.10FU	5.04008e-071	270.731	146	1	166	289	451	160	160	96.4	100	166	k__Fungi	p__Ascomycota	c__Saccharomycetes	o__Saccharomycetales	f__Trichomonascaceae	g__Blastobotrys	s__Blastobotrys_sp
OTU320	SINGLETON|n=1	0	0	1															k_	p_	c_	o_	f_	g_	s_
OTU321	SINGLETON|n=1	0	0	1	MT872624	SH0912804.10FU	4.56462e-066	254.111	137	1	152	578	729	147	147	96.7	100	152	k__Fungi	p__Ascomycota	c__Eurotiomycetes	o__Eurotiomycetes_ord_Incertae_sedis	f__Eurotiomycetes_fam_Incertae_sedis	g__Eurotiomycetes_gen_Incertae_sedis	s__Eurotiomycetes_sp
OTU322	SINGLETON|n=1	0	0	1	MT872624	SH0912804.10FU	4.56462e-066	254.111	137	1	152	578	729	147	147	96.7	100	152	k__Fungi	p__Ascomycota	c__Eurotiomycetes	o__Eurotiomycetes_ord_Incertae_sedis	f__Eurotiomycetes_fam_Incertae_sedis	g__Eurotiomycetes_gen_Incertae_sedis	s__Eurotiomycetes_sp
OTU323	SINGLETON|n=1	0	0	1	MT872626	SH0912803.10FU	2.15191e-049	198.712	107	1	151	1577	1729	138	138	91.4	100	151	k__Fungi	p__Ascomycota	c__Eurotiomycetes	o__Eurotiomycetes_ord_Incertae_sedis	f__Eurotiomycetes_fam_Incertae_sedis	g__Eurotiomycetes_gen_Incertae_sedis	s__Eurotiomycetes_sp
OTU324	SINGLETON|n=1	0	0	1	MT872624	SH0912804.10FU	4.56462e-066	254.111	137	1	152	578	729	147	147	96.7	100	152	k__Fungi	p__Ascomycota	c__Eurotiomycetes	o__Eurotiomycetes_ord_Incertae_sedis	f__Eurotiomycetes_fam_Incertae_sedis	g__Eurotiomycetes_gen_Incertae_sedis	s__Eurotiomycetes_sp
OTU325	SINGLETON|n=1	0	0	1															k_	p_	c_	o_	f_	g_	s_
OTU326	SINGLETON|n=1	0	0	1	MT872624	SH0912804.10FU	7.79461e-044	180.245	97	1	151	578	729	134	134	88.7	100	151	k__Fungi	p__Ascomycota	c__Eurotiomycetes	o__Eurotiomycetes_ord_Incertae_sedis	f__Eurotiomycetes_fam_Incertae_sedis	g__Eurotiomycetes_gen_Incertae_sedis	s__Eurotiomycetes_sp
OTU327	SINGLETON|n=1	0	0	1															k_	p_	c_	o_	f_	g_	s_
OTU328	SINGLETON|n=1	0	0	1	UDB04349073	SH0846887.10FU	2.05324e-059	231.952	125	1	128	334	461	127	127	99.2	87.1	147	k__Fungi	p__Ascomycota	c__Pezizomycotina_cls_Incertae_sedis	o__Pezizomycotina_ord_Incertae_sedis	f__Pezizomycotina_fam_Incertae_sedis	g__Pezizomycotina_gen_Incertae_sedis	s__Pezizomycotina_sp
OTU329	SINGLETON|n=1	0	0	1	KU948765	SH0845488.10FU	4.86738e-057	224.565	121	1	181	261	441	163	163	90.1	91.9	197	k__Fungi	p__Basidiomycota	c__Cystobasidiomycetes	o__Cystobasidiomycetes_ord_Incertae_sedis	f__Cystobasidiomycetes_fam_Incertae_sedis	g__Cystobasidiomycetes_gen_Incertae_sedis	s__Cystobasidiomycetes_sp
OTU330	SINGLETON|n=1	0	0	1	MZ343270	SH0964654.10FU	3.72703e-073	278.118	150	1	184	312	493	173	173	94	92.5	199	k__Fungi	p__Basidiomycota	c__Cystobasidiomycetes	o__Cystobasidiales	f__Cystobasidiaceae	g__Occultifur	s__Occultifur_sp
OTU331	SINGLETON|n=1	0	0	1	OR708694	SH0734441.10FU	3.51384e-098	361.217	195	1	195	342	536	195	195	100	100	195	k__Fungi	p__Basidiomycota	c__Agaricomycetes	o__Phallales	f__Phallaceae	g__Phallus	s__Phallus_impudicus
OTU332	SINGLETON|n=1	0	0	1	GU062229	SH0926075.10FU	7.94934e-111	403.69	218	1	255	308	561	243	243	95.3	98.5	259	k__Fungi	p__Basidiomycota	c__Basidiomycota_cls_Incertae_sedis	o__Basidiomycota_ord_Incertae_sedis	f__Basidiomycota_fam_Incertae_sedis	g__Basidiomycota_gen_Incertae_sedis	s__Basidiomycota_sp
OTU333	SINGLETON|n=1	0	0	1	GU062229	SH0926075.10FU	1.73295e-102	375.99	203	1	255	308	561	238	238	93.3	98.5	259	k__Fungi	p__Basidiomycota	c__Basidiomycota_cls_Incertae_sedis	o__Basidiomycota_ord_Incertae_sedis	f__Basidiomycota_fam_Incertae_sedis	g__Basidiomycota_gen_Incertae_sedis	s__Basidiomycota_sp
OTU334	SINGLETON|n=1	0	0	1	GU062229	SH0926075.10FU	7.94934e-111	403.69	218	1	255	308	561	243	243	95.3	98.5	259	k__Fungi	p__Basidiomycota	c__Basidiomycota_cls_Incertae_sedis	o__Basidiomycota_ord_Incertae_sedis	f__Basidiomycota_fam_Incertae_sedis	g__Basidiomycota_gen_Incertae_sedis	s__Basidiomycota_sp
OTU335	SINGLETON|n=1	0	0	1	GU062229	SH0926075.10FU	1.69655e-117	425.85	230	1	255	308	561	247	247	96.9	98.5	259	k__Fungi	p__Basidiomycota	c__Basidiomycota_cls_Incertae_sedis	o__Basidiomycota_ord_Incertae_sedis	f__Basidiomycota_fam_Incertae_sedis	g__Basidiomycota_gen_Incertae_sedis	s__Basidiomycota_sp
OTU336	SINGLETON|n=1	0	0	1	MT223780	SH0934675.10FU	1.04248e-093	346.444	187	1	205	338	542	199	199	97.1	100	205	k__Fungi	p__Basidiomycota	c__Exobasidiomycetes	o__Exobasidiales	f__Exobasidiaceae	g__Arcticomyces	s__Arcticomyces_warmingii
OTU337	SINGLETON|n=1	0	0	1	OP045988	SH0880566.10FU	1.1479e-093	346.444	187	1	215	341	560	210	210	97.7	96.4	223	k__Fungi	p__Basidiomycota	c__Microbotryomycetes	o__Microbotryomycetes_ord_Incertae_sedis	f__Colacogloeaceae	g__Colacogloea	s__Colacogloea_sp
OTU338	SINGLETON|n=1	0	0	1	OQ694453	SH0899106.10FU	1.47024e-062	243.031	131	1	213	442	652	190	190	89.2	100	213	k__Fungi	p__Basidiomycota	c__Agaricostilbomycetes	o__Agaricostilbales	f__Chionosphaeraceae	g__Chionosphaera	s__Chionosphaera_cuniculicola
OTU339	SINGLETON|n=1	1	0	0															k_	p_	c_	o_	f_	g_	s_
OTU340	SINGLETON|n=1	0	0	1															k_	p_	c_	o_	f_	g_	s_
OTU341	SINGLETON|n=1	0	0	1	MH188916	SH0926074.10FU	1.21839e-103	379.683	205	1	238	347	584	228	228	95.8	100	238	k__Fungi	p__Basidiomycota	c__Exobasidiomycetes	o__Exobasidiales	f__Exobasidiales_fam_Incertae_sedis	g__Guomyces	s__Guomyces_nicotianae
