# Supplementary material for: Extremotolerant Fungi in Resinous Soils: A Unique Diversity of Generalist and Specialized Hydrocarbon Degraders
Source: Research Square preprint supplement (doi:10.21203/rs.3.rs-8530099/v1), 2026-02-10
Supplement: Supplementary file 3 [file 5396253257c7d2283453afad.xlsx]

## Sheet: Table_S18_alpha_diversity_data_
	latitude	longitude	continent	country	region	region2	region3	region4	biome	biome_type	Shannon
A1	58.3	26.65	Europe	Estonia					forest	temperate coniferous forest	3.42426
A10	58.41	26.65	Europe	Estonia					forest	temperate coniferous forest	4.88936
A11	58.54	27.18	Europe	Estonia					forest	temperate coniferous forest	5.18655
A12	58.57	26.98	Europe	Estonia					forest	temperate coniferous forest	5.26936
A13	58.79	26.7	Europe	Estonia					forest	temperate coniferous forest	4.86211
A14	58.68	25.94	Europe	Estonia					forest	temperate coniferous forest	5.1258
A15	58.2	26.21	Europe	Estonia					forest	temperate coniferous forest	4.92136
A16	57.93	26.92	Europe	Estonia					forest	temperate coniferous forest	4.41101
A17	58.26	26.44	Europe	Estonia					forest	temperate coniferous forest	5.34499
A18	58.25	26.44	Europe	Estonia					forest	temperate coniferous forest	5.102
A19	57.94	27.06	Europe	Estonia					forest	temperate coniferous forest	4.98271
A2	58.46	26.82	Europe	Estonia					forest	temperate coniferous forest	5.0515
A20	58.07	26.75	Europe	Estonia					forest	temperate coniferous forest	5.1087
A21	57.95	26.9	Europe	Estonia					forest	temperate coniferous forest	4.66198
A22	57.92	27.03	Europe	Estonia					forest	temperate coniferous forest	5.47975
A23	57.93	26.91	Europe	Estonia					forest	temperate coniferous forest	5.07569
A24	57.97	26.06	Europe	Estonia					forest	temperate coniferous forest	3.85965
A25	58.78	26.35	Europe	Estonia					forest	temperate coniferous forest	5.05337
A26	58.28	26.38	Europe	Estonia					forest	temperate coniferous forest	4.93115
A27	58.27	26.39	Europe	Estonia					forest	temperate coniferous forest	4.6359
A28	58.78	26.36	Europe	Estonia					forest	temperate coniferous forest	5.07025
A29	58.74	26.66	Europe	Estonia					forest	temperate coniferous forest	4.81533
A3	58.46	26.81	Europe	Estonia					forest	temperate coniferous forest	5.55987
A30	58.75	26.51	Europe	Estonia	Kuremaa Metskond				forest	temperate coniferous forest	4.8745
A31	58.17	26.14	Europe	Estonia					forest	temperate coniferous forest	4.84513
A32	58.25	27.29	Europe	Estonia					forest	temperate coniferous forest	5.03512
A4	58.55	26.87	Europe	Estonia					forest	temperate coniferous forest	5.08588
A5	58.52	26.96	Europe	Estonia					forest	temperate coniferous forest	4.65605
A6	58.75	26.66	Europe	Estonia					forest	temperate coniferous forest	4.85445
A7	58.42	27.01	Europe	Estonia					forest	temperate coniferous forest	4.17753
A8	58.34	26.89	Europe	Estonia	Kaagvere				forest	temperate coniferous forest	4.9256
A9	58.56	26.84	Europe	Estonia					forest	temperate coniferous forest	4.91806
B1	58.2	26.67	Europe	Estonia					forest	temperate coniferous forest	4.64226
B10	58.78	26.35	Europe	Estonia					forest	temperate coniferous forest	4.67305
B11	57.87	26.13	Europe	Estonia					forest	temperate coniferous forest	4.55665
B12	57.92	27.04	Europe	Estonia					forest	temperate coniferous forest	4.05516
B13	58.07	26.75	Europe	Estonia					forest	temperate coniferous forest	4.88403
B14	58	26.61	Europe	Estonia					forest	temperate coniferous forest	4.58273
B15	58.66	26.11	Europe	Estonia					forest	temperate coniferous forest	4.85542
B16	58.05	26.83	Europe	Estonia					forest	temperate coniferous forest	4.17746
B2	58.21	26.69	Europe	Estonia					forest	temperate coniferous forest	4.05799
B3	58.59	27.03	Europe	Estonia					forest	temperate coniferous forest	5.0687
B4	58.2	26.74	Europe	Estonia					forest	temperate coniferous forest	5.12553
B5	58.19	26.8	Europe	Estonia					forest	temperate coniferous forest	4.14238
B6	58.2	26.67	Europe	Estonia					forest	temperate coniferous forest	4.65794
B7	58.43	26.56	Europe	Estonia					forest	temperate coniferous forest	4.58125
B8	58.79	26.69	Europe	Estonia					forest	temperate coniferous forest	4.51567
B9	57.94	26.89	Europe	Estonia					forest	temperate coniferous forest	4.8533
BB1	58.29	26.63	Europe	Estonia					forest	temperate coniferous forest	4.33165
BB10	58.12	26.71	Europe	Estonia					forest	temperate coniferous forest	5.06602
BB11	58.34	27.11	Europe	Estonia					forest	temperate coniferous forest	4.32766
BB12	57.91	26.1	Europe	Estonia					forest	temperate coniferous forest	4.80764
BB13	58.36	26.96	Europe	Estonia					forest	temperate coniferous forest	4.7061
BB14	58.02	26.82	Europe	Estonia					forest	temperate coniferous forest	4.77515
BB15	57.99	26.07	Europe	Estonia					forest	temperate coniferous forest	4.69831
BB2	58.12	26.42	Europe	Estonia					forest	temperate coniferous forest	4.46344
BB3	57.68	26.93	Europe	Estonia					forest	temperate coniferous forest	4.72548
BB4	58.69	25.95	Europe	Estonia					forest	temperate coniferous forest	4.92446
BB5	58.3	26.65	Europe	Estonia					forest	temperate coniferous forest	4.73233
BB6	58.12	26.61	Europe	Estonia					forest	temperate coniferous forest	5.03009
BB7	58.13	26.62	Europe	Estonia					forest	temperate coniferous forest	4.88049
BB8	57.75	26.92	Europe	Estonia					forest	temperate coniferous forest	4.23411
BB9	57.75	26.92	Europe	Estonia					forest	temperate coniferous forest	4.58527
C1	58.19	26.79	Europe	Estonia					forest	temperate coniferous forest	4.72994
C10	58.42	27.03	Europe	Estonia					forest	temperate coniferous forest	4.53998
C11	58.07	26.75	Europe	Estonia					forest	temperate coniferous forest	5.14364
C12	58.74	26.5	Europe	Estonia					forest	temperate coniferous forest	4.94093
C13	57.93	26.05	Europe	Estonia					forest	temperate coniferous forest	4.88605
C14	58.78	26.36	Europe	Estonia					forest	temperate coniferous forest	4.53474
C15	58.11	26.58	Europe	Estonia					forest	temperate coniferous forest	4.37725
C16	58.71	26.24	Europe	Estonia					forest	temperate coniferous forest	4.87041
C17	58.31	26.5	Europe	Estonia					forest	temperate coniferous forest	5.05029
C2	58.52	26.96	Europe	Estonia					forest	temperate coniferous forest	4.82652
C3	58.2	26.74	Europe	Estonia					forest	temperate coniferous forest	4.63349
C4	58.54	27.16	Europe	Estonia					forest	temperate coniferous forest	4.73822
C5	58.34	27.05	Europe	Estonia					forest	temperate coniferous forest	4.76778
C7	58.67	26.1	Europe	Estonia					forest	temperate coniferous forest	4.45759
C9	58.58	27	Europe	Estonia					forest	temperate coniferous forest	4.92094
CC1	58.28	26.69	Europe	Estonia					forest	temperate coniferous forest	5.0112
CC10	58.41	26.56	Europe	Estonia					forest	temperate coniferous forest	4.89366
CC11	58.09	26.44	Europe	Estonia					forest	temperate coniferous forest	4.89864
CC12	58.26	27.27	Europe	Estonia					forest	temperate coniferous forest	4.80087
CC13	58.49	26.5	Europe	Estonia					forest	temperate coniferous forest	5.04286
CC14	58.75	26.28	Europe	Estonia					forest	temperate coniferous forest	5.38458
CC15	58.6	26.98	Europe	Estonia					forest	temperate coniferous forest	5.3096
CC2	58.42	26.62	Europe	Estonia					forest	temperate coniferous forest	5.14626
CC3	58.11	26.4	Europe	Estonia					forest	temperate coniferous forest	4.44554
CC4	57.71	26.81	Europe	Estonia					forest	temperate coniferous forest	4.39328
CC5	57.7	26.74	Europe	Estonia					forest	temperate coniferous forest	4.41382
CC6	58.7	26.24	Europe	Estonia					forest	temperate coniferous forest	5.34185
CC7	58.55	26.93	Europe	Estonia					forest	temperate coniferous forest	4.53287
CC8	58.16	26.42	Europe	Estonia					forest	temperate coniferous forest	5.01636
CC9	58.1	26.54	Europe	Estonia					forest	temperate coniferous forest	5.02768
D1	58.27	26.64	Europe	Estonia					forest	temperate coniferous forest	4.23322
D10	57.87	26.12	Europe	Estonia					forest	temperate coniferous forest	4.33955
D11	57.96	26.76	Europe	Estonia					forest	temperate coniferous forest	4.89185
D12	58	26.62	Europe	Estonia					forest	temperate coniferous forest	5.03521
D13	58.79	26.69	Europe	Estonia					forest	temperate coniferous forest	4.38787
D14	58.04	26.38	Europe	Estonia					forest	temperate coniferous forest	4.01833
D15	58.28	26.64	Europe	Estonia					forest	temperate coniferous forest	4.24496
D16	58.52	26.96	Europe	Estonia					forest	temperate coniferous forest	4.83391
D2	58.27	26.64	Europe	Estonia					forest	temperate coniferous forest	4.58455
D3	58.16	27.04	Europe	Estonia					forest	temperate coniferous forest	4.55964
D4	58.59	27.14	Europe	Estonia					forest	temperate coniferous forest	4.81085
D5	58.58	26.93	Europe	Estonia					forest	temperate coniferous forest	4.74481
D6	58.77	26.32	Europe	Estonia					forest	temperate coniferous forest	5.37525
D7	59.24	25.67	Europe	Estonia					forest	temperate coniferous forest	5.21678
D8	58.08	26.75	Europe	Estonia					forest	temperate coniferous forest	4.80074
D9	57.93	26.06	Europe	Estonia					forest	temperate coniferous forest	4.8939
Darta01	57.36	24.62	Europe	Latvia	Limbazi	Vidrizi			forest	temperate coniferous forest	4.63861
Darta02	56.56	24.08	Europe	Latvia	Iecava	Saktas			forest	temperate coniferous forest	5.66973
Darta03	56.55	24.07	Europe	Latvia	Iecava	Medni			forest	temperate coniferous forest	5.05338
Darta04	56.36	24.32	Europe	Latvia	Bauska	Ceraukste			forest	temperate coniferous forest	5.34244
Darta05	56.92	22.69	Europe	Latvia	Tukums	Aizlolas			forest	temperate coniferous forest	4.11848
Darta06	57.07	22.77	Europe	Latvia	Kandava	Matisi			forest	temperate coniferous forest	4.77756
Darta07	57.06	22.72	Europe	Latvia	Kanadva	Viesturi			forest	temperate coniferous forest	4.86305
Darta08	56.61	23.16	Europe	Latvia	Dobele	Mezansi			forest	temperate coniferous forest	4.86106
Darta09	56.31	25.46	Europe	Latvia	Viesite	Odzani			forest	temperate coniferous forest	5.11702
Darta10	56.26	25.42	Europe	Latvia	Viesite	Palsani			forest	temperate coniferous forest	4.3584
Darta11	56.63	24.35	Europe	Latvia	Iecava	Dzelzamurs			forest	temperate coniferous forest	2.69353
Darta12	56.66	24.34	Europe	Latvia	Iecava	Dzelzamurs			forest	temperate coniferous forest	4.18748
Darta13	56.57	24.15	Europe	Latvia	Iecava	Gaili			forest	temperate coniferous forest	4.71671
Darta14	56.57	24.15	Europe	Latvia	Iecava	Gaili			forest	temperate coniferous forest	5.08211
Darta15	57.05	22.7	Europe	Latvia	Kandava	Strauti			forest	temperate coniferous forest	4.74942
Darta16	57.08	22.68	Europe	Latvia	Kandava	Skruskopi			forest	temperate coniferous forest	4.56705
Darta17	56.48	24.11	Europe	Latvia	Bauska	Mezotne			forest	temperate coniferous forest	5.04591
Darta18	57.04	22.67	Europe	Latvia	Kandava				forest	temperate coniferous forest	5.01284
Darta19	56.61	22.85	Europe	Latvia	Auceile				forest	temperate coniferous forest	5.00542
Darta20	56.3	27.29	Europe	Latvia	Rezekne	Malta			forest	temperate coniferous forest	5.19829
Darta21	57.19	21.9	Europe	Latvia	Ugale	Rapati			forest	temperate coniferous forest	4.81283
Darta22	57.66	26.1	Europe	Latvia	Valka				forest	temperate coniferous forest	4.46149
Darta23	57	23.43	Europe	Latvia	Kemeri	Caukciems			forest	temperate coniferous forest	5.16108
Darta24	56.77	22.6	Europe	Latvia	Remte	Sturisi			forest	temperate coniferous forest	4.76164
Darta25	56.9	25.18	Europe	Latvia	Ogre	Keipene			forest	temperate coniferous forest	5.28658
Darta26	56.84	25.39	Europe	Latvia	Ogre	Taurupe			forest	temperate coniferous forest	4.66367
Darta27	56.86	24.79	Europe	Latvia	Ikskile	Turkalne			forest	temperate coniferous forest	4.37456
Darta28	56.72	22.99	Europe	Latvia	Jaunpils				forest	temperate coniferous forest	4.34096
Darta29	56.74	24.94	Europe	Latvia	Lielvarde				forest	temperate coniferous forest	4.71271
Darta30	56.69	25.2	Europe	Latvia	Skriveri				forest	temperate coniferous forest	4.77494
Darta31	57.05	25.08	Europe	Latvia	More				forest	temperate coniferous forest	4.72836
DD1	58.4	26.66	Europe	Estonia					forest	temperate coniferous forest	5.43912
DD10	58.28	27.34	Europe	Estonia					forest	temperate coniferous forest	4.50434
DD11	58.09	26.45	Europe	Estonia					forest	temperate coniferous forest	5.04631
DD12	58.69	26.25	Europe	Estonia					forest	temperate coniferous forest	5.18412
DD13	58.49	26.49	Europe	Estonia					forest	temperate coniferous forest	4.95214
DD14	58.42	26.56	Europe	Estonia					forest	temperate coniferous forest	4.92429
DD15	58.33	26.53	Europe	Estonia					forest	temperate coniferous forest	4.89117
DD2	58.3	26.68	Europe	Estonia					forest	temperate coniferous forest	5.31438
DD3	58.23	26.68	Europe	Estonia					forest	temperate coniferous forest	5.04626
DD4	58.11	26.4	Europe	Estonia					forest	temperate coniferous forest	4.53963
DD5	58.09	26.45	Europe	Estonia					forest	temperate coniferous forest	4.72976
DD6	58.44	26.73	Europe	Estonia					forest	temperate coniferous forest	4.77829
DD7	58.22	26.28	Europe	Estonia					forest	temperate coniferous forest	4.593
DD8	58.16	26.42	Europe	Estonia					forest	temperate coniferous forest	5.08972
DD9	58.09	26.53	Europe	Estonia					forest	temperate coniferous forest	5.28858
E1	58.54	26.87	Europe	Estonia					forest	temperate coniferous forest	4.9808
E10	57.99	26.62	Europe	Estonia					forest	temperate coniferous forest	4.73079
E11	58.03	26.47	Europe	Estonia					forest	temperate coniferous forest	4.7799
E12	57.96	26.77	Europe	Estonia					forest	temperate coniferous forest	4.9382
E13	58.3	26.67	Europe	Estonia					forest	temperate coniferous forest	3.45999
E14	58.04	26.39	Europe	Estonia					forest	temperate coniferous forest	4.95389
E15	57.98	26.81	Europe	Estonia					forest	temperate coniferous forest	4.66558
E2	58.54	26.86	Europe	Estonia					forest	temperate coniferous forest	5.08716
E3	58.59	27.14	Europe	Estonia					forest	temperate coniferous forest	4.47944
E4	58.16	27.04	Europe	Estonia	Akste				forest	temperate coniferous forest	4.91605
E5	58.58	27	Europe	Estonia					forest	temperate coniferous forest	3.72734
E6	58.67	26.21	Europe	Estonia					forest	temperate coniferous forest	4.69258
E7	58.69	25.89	Europe	Estonia					forest	temperate coniferous forest	4.69626
E8	58.07	26.75	Europe	Estonia					forest	temperate coniferous forest	4.64071
E9	57.96	26.07	Europe	Estonia					forest	temperate coniferous forest	4.68176
EE1	58.54	26.88	Europe	Estonia					forest	temperate coniferous forest	5.13655
EE10	58.25	26.45	Europe	Estonia					forest	temperate coniferous forest	5.09663
EE11	58.41	26.56	Europe	Estonia					forest	temperate coniferous forest	5.40681
EE12	58.04	26.4	Europe	Estonia					forest	temperate coniferous forest	5.5215
EE13	58.72	26.26	Europe	Estonia					forest	temperate coniferous forest	5.1079
EE14	58.44	26.57	Europe	Estonia					forest	temperate coniferous forest	5.62895
EE15	58.28	27.32	Europe	Estonia					forest	temperate coniferous forest	4.3433
EE2	58.41	26.63	Europe	Estonia					forest	temperate coniferous forest	5.11013
EE3	58.43	26.54	Europe	Estonia					forest	temperate coniferous forest	5.23533
EE4	58.12	26.49	Europe	Estonia					forest	temperate coniferous forest	5.12035
EE5	58.12	26.41	Europe	Estonia					forest	temperate coniferous forest	4.68053
EE6	58.54	26.92	Europe	Estonia					forest	temperate coniferous forest	4.41167
EE7	58.44	26.73	Europe	Estonia					forest	temperate coniferous forest	5.10792
EE8	57.78	26.8	Europe	Estonia					forest	temperate coniferous forest	4.59535
EE9	58.09	26.53	Europe	Estonia					forest	temperate coniferous forest	5.35859
F1	58.53	26.72	Europe	Estonia					forest	temperate coniferous forest	5.55127
F10	58.35	26.89	Europe	Estonia					forest	temperate coniferous forest	4.18315
F11	58.18	27.36	Europe	Estonia					forest	temperate coniferous forest	5.27317
F12	58.11	26.98	Europe	Estonia					forest	temperate coniferous forest	4.9349
F13	58.59	26.87	Europe	Estonia					forest	temperate coniferous forest	4.97068
F14	58.23	26.7	Europe	Estonia					forest	temperate coniferous forest	4.57931
F15	58.19	26.41	Europe	Estonia					forest	temperate coniferous forest	5.13379
F2	58.33	26.89	Europe	Estonia					forest	temperate coniferous forest	5.18867
F3	58.05	26.77	Europe	Estonia					forest	temperate coniferous forest	4.8696
F4	58.23	26.68	Europe	Estonia					forest	temperate coniferous forest	4.7994
F5	57.99	26.38	Europe	Estonia					forest	temperate coniferous forest	5.00642
F6	58.14	26.95	Europe	Estonia					forest	temperate coniferous forest	5.06956
F7	57.88	26.58	Europe	Estonia					forest	temperate coniferous forest	4.83717
F8	58.09	27.38	Europe	Estonia					forest	temperate coniferous forest	4.87804
F9	57.84	26.8	Europe	Estonia					forest	temperate coniferous forest	5.10943
FF1	58.4	26.64	Europe	Estonia					forest	temperate coniferous forest	5.70264
FF10	58.51	26.48	Europe	Estonia					forest	temperate coniferous forest	5.21728
FF11	58.04	26.4	Europe	Estonia					forest	temperate coniferous forest	3.65876
FF12	58.74	26.32	Europe	Estonia					forest	temperate coniferous forest	5.50105
FF13	58.42	26.56	Europe	Estonia					forest	temperate coniferous forest	5.77411
FF14	58.61	27.13	Europe	Estonia					forest	temperate coniferous forest	4.66963
FF15	58.28	27.32	Europe	Estonia					forest	temperate coniferous forest	4.25237
FF2	58.41	26.64	Europe	Estonia					forest	temperate coniferous forest	5.29859
FF3	58.09	26.45	Europe	Estonia					forest	temperate coniferous forest	4.55579
FF4	58.46	26.82	Europe	Estonia					forest	temperate coniferous forest	4.90085
FF5	58.75	26.32	Europe	Estonia					forest	temperate coniferous forest	4.60339
FF6	58.55	26.93	Europe	Estonia					forest	temperate coniferous forest	4.95108
FF7	58.17	26.42	Europe	Estonia					forest	temperate coniferous forest	4.90593
FF8	58.09	26.53	Europe	Estonia					forest	temperate coniferous forest	5.28091
FF9	58.28	27.32	Europe	Estonia					forest	temperate coniferous forest	5.16909
G2536	58.46	26.82	Europe	Estonia	Lulli				forest	temperate coniferous forest	3.85843
G2536z	58.46	26.82	Europe	Estonia	Lulli				forest	temperate coniferous forest	5.68873
G2537	58.19	26.57	Europe	Estonia	Pangodi				forest	temperate coniferous forest	5.18966
G2538	58.12	27.03	Europe	Estonia	Maarjakula				forest	temperate coniferous forest	5.12034
G2541	58.28	27.32	Europe	Estonia	Jarvselja				forest	temperate broadleaf forest	4.84736
G2542	58.28	27.32	Europe	Estonia	Jarvselja				forest	temperate broadleaf forest	5.05076
G2543	58.28	27.32	Europe	Estonia	Jarvselja				forest	temperate broadleaf forest	4.86395
G2544	58.27	27.32	Europe	Estonia	Jarvselja				forest	temperate broadleaf forest	4.7607
G2545	58.28	27.32	Europe	Estonia	Jarvselja				forest	temperate broadleaf forest	4.88707
G2548	58.27	27.33	Europe	Estonia	Jarvselja				forest	temperate broadleaf forest	4.93895
G2549	58.37	25.59	Europe	Estonia	Haage				forest	temperate coniferous forest	5.41762
G2550	58.28	27.32	Europe	Estonia	Jarvselja				forest	temperate broadleaf forest	5.44851
G2551	58.28	27.32	Europe	Estonia	Jarvselja				forest	temperate broadleaf forest	4.67135
G2552	58.28	27.32	Europe	Estonia	Jarvselja				forest	temperate broadleaf forest	5.82755
G2553	58.28	27.32	Europe	Estonia	Jarvselja				forest	temperate broadleaf forest	4.85655
G2554	58.28	27.32	Europe	Estonia	Jarvselja				forest	temperate broadleaf forest	5.58085
G2555	58.28	27.33	Europe	Estonia	Jarvselja				forest	temperate broadleaf forest	4.94254
G2556	58.27	27.33	Europe	Estonia	Jarvselja				forest	temperate coniferous forest	4.85345
G2557	58.28	27.34	Europe	Estonia	Jarvselja				forest	temperate broadleaf forest	5.65043
G2558	58.28	27.33	Europe	Estonia	Jarvselja				forest	temperate broadleaf forest	5.26634
G2559	58.27	27.33	Europe	Estonia	Jarvselja				forest	temperate coniferous forest	5.28832
G2561	58.27	27.32	Europe	Estonia	Jarvselja				forest	temperate coniferous forest	4.95379
G2562	58.26	27.32	Europe	Estonia	Jarvselja				forest	temperate coniferous forest	5.25884
G2563	58.26	27.31	Europe	Estonia	Jarvselja				forest	temperate broadleaf forest	5.1622
G2564	58.26	27.31	Europe	Estonia	Jarvselja				forest	temperate broadleaf forest	4.94804
G2565	58.26	27.31	Europe	Estonia	Jarvselja				forest	temperate broadleaf forest	5.06395
G2566	58.28	27.3	Europe	Estonia	Jarvselja				forest	temperate coniferous forest	5.1414
G2567	58.28	27.31	Europe	Estonia	Jarvselja				forest	temperate coniferous forest	5.11307
G2568	58.28	27.31	Europe	Estonia	Jarvselja				forest	temperate broadleaf forest	5.60634
G2569	58.28	27.31	Europe	Estonia	Jarvselja				forest	temperate broadleaf forest	5.70489
G2570	58.27	27.31	Europe	Estonia	Jarvselja				forest	temperate broadleaf forest	5.26709
G2571	58.29	27.33	Europe	Estonia	Jarvselja				forest	temperate broadleaf forest	6.04731
G2573	58.29	27.33	Europe	Estonia	Jarvselja				forest	temperate broadleaf forest	5.71558
G2574	58.29	27.31	Europe	Estonia	Jarvselja				forest	temperate broadleaf forest	5.61584
G2575	58.27	27.31	Europe	Estonia	Jarvselja				forest	temperate coniferous forest	5.25081
G2576	58.27	27.32	Europe	Estonia	Jarvselja				forest	temperate broadleaf forest	5.45435
G2577	58.27	27.32	Europe	Estonia	Jarvselja				forest	temperate coniferous forest	5.00418
G2578	58.29	27.36	Europe	Estonia	Jarvselja				forest	temperate broadleaf forest	5.3921
G2579	58.28	27.34	Europe	Estonia	Jarvselja				forest	temperate broadleaf forest	4.82019
G2580	58.28	27.33	Europe	Estonia	Jarvselja				forest	temperate broadleaf forest	5.59497
G2581	58.28	27.33	Europe	Estonia	Jarvselja				forest	temperate broadleaf forest	5.14762
G2616	58.26	27.3	Europe	Estonia	Jarvselja				forest	temperate coniferous forest	5.3558
G2620	58.28	26.37	Europe	Estonia	P0rguauk				forest	temperate broadleaf forest	5.82809
G2620z	58.28	26.37	Europe	Estonia	P0rguauk				forest	temperate broadleaf forest	5.52728
G2629	58.05	24.71	Europe	Estonia	N-Nigula				forest	temperate coniferous forest	5.98307
G2634	58.34	26.56	Europe	Estonia	N0giaru				forest	temperate broadleaf forest	5.74724
G2634z	58.34	26.56	Europe	Estonia	N0giaru				forest	temperate broadleaf forest	5.5617
G2745X	58.33	21.9	Europe	Estonia	Tagam0isa				woodland	temperate woodland	5.54373
G2755X	58.39	22.66	Europe	Estonia	Liiva-Putla				forest	temperate coniferous forest	5.10785
G2755XZ	58.39	22.66	Europe	Estonia	Liiva-Putla				forest	temperate coniferous forest	3.91148
G2757X	58.02	22.17	Europe	Estonia	Viieristi				forest	temperate coniferous forest	5.95969
G2767	58.31	22.08	Europe	Estonia	Maebe				woodland	temperate woodland	5.87683
G2767z	58.31	22.08	Europe	Estonia	Maebe				woodland	temperate woodland	5.47247
G2788	58.3	22.1	Europe	Estonia	Upa				forest	temperate broadleaf forest	5.73142
G2794	58.49	22.83	Europe	Estonia	Ratla				forest	temperate broadleaf forest	5.12943
G2797	58.61	22.8	Europe	Estonia	Hindu				forest	temperate coniferous forest	5.52052
G2819	58.23	22.44	Europe	Estonia	Loode				woodland	temperate woodland	5.27643
G2829	58.56	23.55	Europe	Estonia	Puhtu				forest	temperate broadleaf forest	4.97921
G2829z	58.56	23.55	Europe	Estonia	Puhtu				forest	temperate broadleaf forest	5.00981
G2830	58.58	23.57	Europe	Estonia	Laelatu				woodland	temperate woodland	5.17695
G2830y	58.58	23.57	Europe	Estonia	Laelatu				woodland	temperate woodland	5.12809
G2830z	58.58	23.57	Europe	Estonia	Laelatu				woodland	temperate woodland	5.12924
G2831	58.62	24.1	Europe	Estonia	Mihkli				forest	temperate broadleaf forest	5.49184
G2832	58.24	26.58	Europe	Estonia	Luke				anthropogenic	village	5.19984
G2834	66.71	20.1	Europe	Sweden	Jokkmokk				forest	subpolar coniferous forest	5.25268
G2835	68.23	21.95	Europe	Sweden	Idivuoma				forest	subpolar coniferous forest	5.26088
G2836	68.6	21.75	Europe	Finland	Kelottijarvi				forest	subpolar coniferous forest	5.41475
G2838	69.89	21.57	Europe	Norway	Kvaenangsfjellet				tundra	tundra	5.64263
G2838X	69.9	21.58	Europe	Norway	Kvaenangsfjellet				tundra	tundra	5.91959
G2839	70.15	24.79	Europe	Norway	Stabbursdalen				forest	subpolar coniferous forest	4.77566
G2839z	70.15	24.79	Europe	Norway	Stabbursdalen				forest	subpolar coniferous forest	4.92983
G2840	68.06	24.03	Europe	Finland	Pallastunturi				tundra	tundra	5.41948
G2844	58.08	26.34	Europe	Estonia	Valkmae				forest	temperate coniferous forest	5.65861
G2846	58.89	23.68	Europe	Estonia	Uneste				forest	temperate broadleaf forest	5.5063
G2847	58.93	23.86	Europe	Estonia	Turvalepa				forest	temperate broadleaf forest	5.9881
G2848	58.44	26.71	Europe	Estonia	Vasula				forest	temperate broadleaf forest	5.6632
G2971	59.42	24.67	Europe	Estonia	Veskimetsa				forest	temperate broadleaf forest	5.39642
G3224	58.28	22.82	Europe	Estonia	Nassuma				forest	temperate broadleaf forest	4.88931
G3232	58.21	22.31	Europe	Estonia	Mandjala				forest	temperate coniferous forest	4.59071
G3242	59.49	25.36	Europe	Estonia	Valkla				forest	temperate broadleaf forest	5.60201
G3247	58.36	22.48	Europe	Estonia	Kirikukula				forest	temperate broadleaf forest	5.24309
G3308	58.3	21.94	Europe	Estonia	Atla				shrubland	temperate shrubland	5.53665
G3318	58.28	22.46	Europe	Estonia	Unemae				grassland	flooded grassland	5.38945
G3406	58.15	25.04	Europe	Estonia	Tihemetsa park				anthropogenic	village	5.26319
G3412	58.4	26.74	Europe	Estonia	Eesti Rahvamuuseum				anthropogenic	village	4.78571
G3413	58.44	26.9	Europe	Estonia	Vaagvere				forest	temperate broadleaf forest	4.4474
G3419	58.32	26.72	Europe	Estonia	ulenurme m0isapark				anthropogenic	village	4.63473
G3426	58.35	25.55	Europe	Estonia	Pinska				forest	temperate broadleaf forest	5.24098
G3426y	58.35	25.55	Europe	Estonia	Pinska				forest	temperate broadleaf forest	4.66497
G3426z	58.35	25.55	Europe	Estonia	Pinska				forest	temperate broadleaf forest	4.89767
G3429	58.47	22.82	Europe	Estonia	Ratla				woodland	temperate woodland	5.71965
G3430	58.3	22.58	Europe	Estonia	Tahula				forest	temperate broadleaf forest	5.44675
G3449	58.1	27.46	Europe	Estonia	Rapina				anthropogenic	urban	5.07943
G3477	32.69	-17.12	Europe	Portugal	Madeira				forest	subtropical broadleaf forest	3.55341
G3478	36.78	12	Europe	Italy	Pantelleria	Montagne Grande summit			forest	temperate broadleaf forest	5.31687
G3480	36.78	12	Europe	Italy	Pantelleria	Montagne Grande Northwest			forest	temperate coniferous forest	5.43176
G3481	36.78	12.02	Europe	Italy	Pantelleria	Montagne Gibele South			forest	temperate broadleaf forest	4.93188
G3484	36.78	12.01	Europe	Italy	Pantelleria	Montagne Gibele crater			shrubland	temperate shrubland	4.67493
G3485	36.78	12.01	Europe	Italy	Pantelleria	Monte Gibele North			forest	temperate coniferous forest	5.20208
G3487	36.82	12.01	Europe	Italy	Pantelleria	Ponta Spadillo			forest	temperate broadleaf forest	4.9789
G3488	36.78	12.04	Europe	Italy	Pantelleria	Serra di Ghirlanda			shrubland	temperate shrubland	5.63154
G3490	36.77	12.02	Europe	Italy	Pantelleria	Byzantine tombs			forest	temperate broadleaf forest	5.49501
G3492	36.74	12.02	Europe	Italy	Pantelleria	Balata dei Turci South			forest	temperate coniferous forest	4.90109
G3493	36.74	12.03	Europe	Italy	Pantelleria	Balata del Turci Northeast			forest	temperate coniferous forest	4.40066
G3494	36.76	12.02	Europe	Italy	Pantelleria	Casa Valerizo			forest	temperate broadleaf forest	4.89807
G3501	36.81	12.01	Europe	Italy	Pantelleria	Cuddia de Mida			forest	temperate broadleaf forest	4.7123
G3504	36.78	12.01	Europe	Italy	Pantelleria	Montagne Gisele Northwest			forest	temperate broadleaf forest	5.70043
G3506	36.78	11.98	Europe	Italy	Pantelleria	Zighidi			shrubland	temperate shrubland	5.5769
G3517	46.9	8.45	Europe	Switzerland	Oberrickenbach				grassland	montane grassland	6.42032
G3518	59.44	24.79	Europe	Estonia	Kadriorg				anthropogenic	urban	5.51146
G3521	58.35	22.25	Europe	Estonia	Praakli				anthropogenic	cropland	4.51128
G3522	58.42	22.15	Europe	Estonia	Pidula				anthropogenic	village	4.73804
G3526	58.01	27.19	Europe	Estonia	Partsi				forest	temperate broadleaf forest	3.42861
G3527	58.35	23.99	Europe	Estonia	T0stamaa park				anthropogenic	village	5.70611
G3529	58.34	24.29	Europe	Estonia	Lindi				forest	temperate broadleaf forest	5.64306
G3531	58.38	24.32	Europe	Estonia	Valgerand				forest	temperate broadleaf forest	5.40617
G3541	59.4	24.29	Europe	Estonia	Keila-Joa				forest	temperate broadleaf forest	5.00072
G3544	59.43	27.52	Europe	Estonia	Toila				forest	temperate broadleaf forest	5.7206
G3545	59.43	27.51	Europe	Estonia	Toila				forest	temperate broadleaf forest	5.47078
G3546	59.44	27.19	Europe	Estonia	Saka				woodland	temperate woodland	4.97077
G3547	58.28	27.32	Europe	Estonia	Jarvselja q226				forest	temperate coniferous forest	5.83449
G3550	58.41	26.6	Europe	Estonia	Kardla				forest	temperate broadleaf forest	5.85537
G3552	58.33	26.66	Europe	Estonia	Lemmatsi				forest	temperate broadleaf forest	5.28909
G3555	58.04	26.46	Europe	Estonia	Puhajarve s0jatammed				anthropogenic	village	4.78969
G3556	58.04	26.57	Europe	Estonia	Pilkuse				forest	temperate broadleaf forest	5.76974
G3557	58.05	26.54	Europe	Estonia	Pilkuse				forest	temperate broadleaf forest	5.76203
G3558	58.06	26.96	Europe	Estonia	Aarna				forest	temperate broadleaf forest	4.62625
G3559	58.06	26.91	Europe	Estonia	Ihamaru Meemaja				anthropogenic	village	5.55945
G3560	57.92	26.58	Europe	Estonia	Urvaste Tamme-Lauri				woodland	temperate woodland	5.79811
G3561	57.98	26.78	Europe	Estonia	Erastvere park				anthropogenic	village	5.25473
G3562	58.06	27.06	Europe	Estonia	P0lva				anthropogenic	urban	5.01731
G3563	58.34	26.65	Europe	Estonia	Rani				forest	temperate broadleaf forest	4.41299
G3564	58.31	26.59	Europe	Estonia	N0giaru				forest	temperate broadleaf forest	4.83778
G3564z	58.31	26.59	Europe	Estonia	N0giaru				forest	temperate broadleaf forest	5.15949
G3565	58.32	26.55	Europe	Estonia	N0giaru				forest	temperate broadleaf forest	6.0815
G3566	58.36	26.52	Europe	Estonia	R0hu				forest	temperate broadleaf forest	5.19516
G3567	58.39	26.55	Europe	Estonia	Ilmatsalu farm				anthropogenic	village	4.89458
G3568	58.36	26.67	Europe	Estonia	Eerika				grassland	temperate grassland	5.56795
G3569	58.53	26.64	Europe	Estonia	aksi				anthropogenic	village	4.99639
G3570	58.58	26.68	Europe	Estonia	Elistvere				anthropogenic	village	4.68286
G3571	58.58	26.72	Europe	Estonia	Lilu				forest	temperate broadleaf forest	4.74958
G3572	58.53	26.73	Europe	Estonia	Saadjarve				forest	temperate coniferous forest	5.06549
G3573	57.18	24.84	Europe	Latvia	Sigulda				forest	temperate broadleaf forest	5.63812
G3574	57.15	24.85	Europe	Latvia	Sigulda station				anthropogenic	urban	5.36373
G3575	56.92	23.98	Europe	Latvia	Riga airport				anthropogenic	urban	5.31581
G3577	57.24	22.64	Europe	Latvia	Skede				forest	temperate broadleaf forest	5.43125
G3579	57.29	22.72	Europe	Latvia	Sarcene				forest	temperate broadleaf forest	4.88184
G3581	57.63	22.29	Europe	Latvia	Slitere				forest	temperate broadleaf forest	5.80749
G3582	57.63	22.39	Europe	Latvia	Vidale				forest	temperate broadleaf forest	5.81785
G3585	57.44	22.65	Europe	Latvia	Lube				forest	temperate broadleaf forest	5.45106
G3586	58.59	23.57	Europe	Estonia	Laelatu				woodland	temperate woodland	3.20071
G3589	58.44	23.3	Europe	Estonia	Kubassaare				forest	temperate broadleaf forest	5.41901
G3590	58.43	23.3	Europe	Estonia	Kubassaare				forest	temperate broadleaf forest	5.75108
G3593	58.53	23.11	Europe	Estonia	Nenu				forest	temperate broadleaf forest	5.71262
G3594	58.33	22.14	Europe	Estonia	Kuuse				forest	temperate broadleaf forest	5.29492
G3595	58.24	22.44	Europe	Estonia	Loode tammik				forest	temperate broadleaf forest	5.41891
G3597	58.01	22.05	Europe	Estonia	Jamaja				forest	temperate broadleaf forest	4.88157
G3598	58.03	22.09	Europe	Estonia	Kaunispe				forest	temperate broadleaf forest	5.55144
G3600	58.43	22.87	Europe	Estonia	Veeriku				forest	temperate broadleaf forest	5.17968
G3601	56.97	24.14	Europe	Latvia	Riga				anthropogenic	urban	5.46169
G3602	57.45	26.35	Europe	Latvia	Viresi				forest	temperate broadleaf forest	5.31095
G3603	57.61	26.35	Europe	Estonia	Tsirgumae				forest	temperate broadleaf forest	5.79303
G3605	57.74	27.06	Europe	Estonia	Vallamae				forest	temperate coniferous forest	5.62182
G3607	57.95	27.21	Europe	Estonia	Leevi				forest	temperate broadleaf forest	5.45457
G3608	58.44	26.71	Europe	Estonia	Vasula lakeside				forest	temperate coniferous forest	5.40809
G3609	58.47	26.73	Europe	Estonia	Vasula manor				forest	temperate broadleaf forest	5.7306
G4004	58.47	26.73	Europe	Estonia	Vasula park				forest	temperate broadleaf forest	5.6858
G4005	58.36	26.74	Europe	Estonia	Tartu	Turu 34a			anthropogenic	rangeland	5.61362
G4074	58.09	26.64	Europe	Estonia	Valgjarve park				anthropogenic	village	5.51426
G4075	58.14	26.94	Europe	Estonia	Koorvere				forest	temperate broadleaf forest	4.76149
G4078	57.73	27.22	Europe	Estonia	Vana-Saaluse				forest	temperate broadleaf forest	5.87196
G4079	57.58	27.21	Europe	Estonia	Hino				forest	temperate coniferous forest	5.56239
G4080	57.59	27.06	Europe	Estonia	Naapka				forest	temperate broadleaf forest	5.66439
G4081	57.61	26.97	Europe	Estonia	Vaike-Palkna				forest	temperate broadleaf forest	5.09925
G4082	57.71	27.07	Europe	Estonia	Vaskna				forest	temperate broadleaf forest	5.56779
G4083	57.74	27.11	Europe	Estonia	Uue-Saaluse park				anthropogenic	village	5.43691
G4084	58.21	27.47	Europe	Estonia	Haavassaar				forest	temperate broadleaf forest	5.73782
G4085	58.22	27.44	Europe	Estonia	Meeksi park				anthropogenic	village	5.29523
G4086	58.22	26.72	Europe	Estonia	Suure-Kambja park				anthropogenic	village	4.99519
G4087	58.18	26.76	Europe	Estonia	Savi				forest	temperate coniferous forest	5.17676
G4088	58.27	26.74	Europe	Estonia	Uhti park				anthropogenic	village	5.37376
G4089	58.37	26.55	Europe	Estonia	Pihva				forest	temperate broadleaf forest	5.75698
G4090	58.43	26.99	Europe	Estonia	Pahklisaar				forest	temperate broadleaf forest	5.29965
G4091	58.38	27.04	Europe	Estonia	Kavastu park				anthropogenic	village	5.3223
G4092	58.65	26.62	Europe	Estonia	Ehavere				forest	temperate broadleaf forest	5.55822
G4093	58.65	26.6	Europe	Estonia	Luua park				anthropogenic	village	5.6431
G4094	58.73	26.53	Europe	Estonia	Kuremaa parkmets				forest	temperate broadleaf forest	4.98431
G4095	58.73	26.53	Europe	Estonia	Kuremaa				forest	temperate broadleaf forest	5.74063
G4096	58.73	26.53	Europe	Estonia	Kuremaa jarv				forest	temperate broadleaf forest	6.09758
G4097	58.78	26.5	Europe	Estonia	Laiuse park				anthropogenic	village	5.88529
G4098	58.69	26.46	Europe	Estonia	Kassinurme				forest	temperate broadleaf forest	4.8486
G4099	57.77	26.3	Europe	Estonia	Pikkjarve				forest	temperate broadleaf forest	5.61534
G4100	57.76	26.3	Europe	Estonia	Karula park				anthropogenic	village	5.66738
G4101	57.72	26.28	Europe	Estonia	Koikkula				anthropogenic	village	5.62801
G4102	57.59	26.3	Europe	Estonia	Ivaski				forest	temperate coniferous forest	5.7033
G4103	57.61	26.26	Europe	Estonia	Parnigu				woodland	temperate woodland	5.63946
G4104	57.68	26.2	Europe	Estonia	Koiva				forest	temperate broadleaf forest	4.8175
G4105	57.7	26.24	Europe	Estonia	Lepa				forest	temperate coniferous forest	5.23094
G4106	59.35	28.14	Europe	Estonia	Narva				forest	temperate broadleaf forest	5.38972
G4107	59.41	27.97	Europe	Estonia	Puhkova				forest	temperate broadleaf forest	4.44569
G4108	59.41	27.96	Europe	Estonia	Merikula				forest	temperate broadleaf forest	5.73645
G4109	59.39	27.85	Europe	Estonia	Pimestiku				forest	temperate broadleaf forest	4.62752
G4110	59.39	27.88	Europe	Estonia	Pimestiku				forest	temperate broadleaf forest	5.91182
G4111	59.38	27.86	Europe	Estonia	Sinimae				forest	temperate broadleaf forest	5.56159
G4115	58.56	23.27	Europe	Estonia	Padaste				forest	temperate broadleaf forest	3.28476
G4117	58.62	23.18	Europe	Estonia	Paenase				forest	temperate broadleaf forest	5.26475
G4118	58.57	23.23	Europe	Estonia	Suurem0isa park				forest	temperate broadleaf forest	5.67333
G4119	58.54	23.09	Europe	Estonia	P0rip0llu				forest	temperate broadleaf forest	5.59142
G4121	58.59	23.08	Europe	Estonia	Koguva				forest	temperate broadleaf forest	5.76509
G4122	58.6	23.1	Europe	Estonia	Koguva				forest	temperate broadleaf forest	4.87057
G4123	58.68	23.17	Europe	Estonia	N0mmkula				forest	temperate broadleaf forest	5.38574
G4124	58.59	23.29	Europe	Estonia	Mala				forest	temperate broadleaf forest	5.22382
G4125	58.56	23.28	Europe	Estonia	Raegma				forest	temperate coniferous forest	4.56905
G4126	58.59	23.18	Europe	Estonia	Linnuse				forest	temperate coniferous forest	5.17088
G4127	58.54	23.04	Europe	Estonia	Tumala park				anthropogenic	village	5.23531
G4128	58.58	22.93	Europe	Estonia	Ööriku				woodland	temperate woodland	5.42304
G4129	58.55	22.92	Europe	Estonia	Kuninguste				forest	temperate broadleaf forest	5.33273
G4130	58.58	22.84	Europe	Estonia	V0hma				forest	temperate broadleaf forest	4.35445
G4131	58.59	22.85	Europe	Estonia	Kavandi				forest	temperate broadleaf forest	5.42044
G4132	58.48	22.78	Europe	Estonia	Koikla park				anthropogenic	village	5.74455
G4133	58.36	22.83	Europe	Estonia	Vanalöve				forest	temperate broadleaf forest	4.79288
G4134	58.38	22.92	Europe	Estonia	Rannakula				forest	temperate broadleaf forest	5.29068
G4135	58.4	22.89	Europe	Estonia	T0niste				forest	temperate broadleaf forest	5.03012
G4136	58.17	24.95	Europe	Estonia	Marana				forest	temperate coniferous forest	4.92803
G4152	64.23	-20.63	Europe	Iceland	Laugarvatn				tundra	tundra	6.03543
G4153	64.5	-21.4	Europe	Iceland	Vatnshornsskogur				tundra	tundra	4.44401
G4154	58.94	25.45	Europe	Estonia	Nehatu				anthropogenic	village	5.62493
G4155	58.9	25.58	Europe	Estonia	Paide				anthropogenic	village	5.91597
G4156	58.91	25.61	Europe	Estonia	Mao park				anthropogenic	village	5.22957
G4157	58.89	25.72	Europe	Estonia	Sargvere park				anthropogenic	village	5.50871
G4158	58.8	25.67	Europe	Estonia	Laimetsa				forest	temperate broadleaf forest	5.64684
G4159	58.32	25.52	Europe	Estonia	Heimtali				forest	temperate broadleaf forest	5.12238
G4160	58.32	25.5	Europe	Estonia	Heimtali				forest	temperate broadleaf forest	5.36385
G4161	58.3	25.5	Europe	Estonia	Vardi				forest	temperate broadleaf forest	5.52257
G4162	58.25	25.49	Europe	Estonia	Paidre				forest	temperate broadleaf forest	5.23251
G4163	58.21	25.46	Europe	Estonia	Ereste				forest	temperate broadleaf forest	5.54594
G4164	58.27	25.62	Europe	Estonia	Paistu				anthropogenic	village	3.87267
G4165	58.27	25.68	Europe	Estonia	Tömbi				forest	temperate broadleaf forest	5.26471
G4166	58.32	25.78	Europe	Estonia	Mustapali				anthropogenic	village	5.54471
G4167	58.92	27.01	Europe	Estonia	Tammispaa				forest	temperate broadleaf forest	5.82485
G4168	58.97	26.94	Europe	Estonia	Vadi				forest	temperate coniferous forest	6.11862
G4169	58.84	26.81	Europe	Estonia	K0nnu				forest	temperate broadleaf forest	5.04675
G4170	58.78	26.77	Europe	Estonia	Tarakvere				anthropogenic	village	5.5438
G4171	58.49	26.23	Europe	Estonia	N0mmeotsa				forest	temperate coniferous forest	5.15965
G4172	58.54	26.2	Europe	Estonia	Kirna				forest	temperate broadleaf forest	5.7396
G4173	57.98	25.92	Europe	Estonia	Patkula				anthropogenic	village	5.89402
G4174	57.86	25.88	Europe	Estonia	Pedeli j0gi				forest	temperate coniferous forest	5.42861
G4175	57.92	25.87	Europe	Estonia	Koorkula				anthropogenic	village	5.86192
G4176	57.96	25.71	Europe	Estonia	Holdre				forest	temperate broadleaf forest	5.62407
G4177	58.01	25.55	Europe	Estonia	Lilli				forest	temperate coniferous forest	5.65312
G4178	58.03	25.77	Europe	Estonia	Liivaku				anthropogenic	village	5.57154
G4179	58.55	27.01	Europe	Estonia	Meoma				forest	temperate broadleaf forest	5.68487
G4180	58.55	27.11	Europe	Estonia	Metsakivi				forest	temperate broadleaf forest	5.32362
G4181	58.61	27.12	Europe	Estonia	Alatskivi				forest	temperate broadleaf forest	5.12083
G4182	58.09	27.56	Europe	Estonia	Beresje				forest	temperate broadleaf forest	5.70821
G4183	58.1	27.49	Europe	Estonia	ulekula				forest	temperate broadleaf forest	5.33926
G4184	58.13	27.53	Europe	Estonia	Perosoon0ts				forest	temperate broadleaf forest	5.35483
G4185	58.1	27.48	Europe	Estonia	Ristipalo				forest	temperate coniferous forest	5.86578
G4186	57.69	27.36	Europe	Estonia	Viitka				forest	temperate coniferous forest	5.95645
G4187	57.71	27.42	Europe	Estonia	Miikse				anthropogenic	village	6.06695
G4188	57.75	27.46	Europe	Estonia	Meremae				forest	temperate broadleaf forest	5.08039
G4189	57.84	27.2	Europe	Estonia	Tammsaare				forest	temperate broadleaf forest	5.15579
G4190	58.62	25.92	Europe	Estonia	V0isiku park				anthropogenic	village	4.92662
G4191	58.69	25.74	Europe	Estonia	Eistvere park				anthropogenic	village	4.57345
G4192	58.7	25.89	Europe	Estonia	Adavere				anthropogenic	village	5.55306
G4193	58.71	25.91	Europe	Estonia	Pajusi				forest	temperate coniferous forest	5.10229
G4194	58.69	25.95	Europe	Estonia	Mallikvere				forest	temperate broadleaf forest	5.6746
G4195	58.66	26.08	Europe	Estonia	Lustivere				woodland	temperate woodland	5.55388
G4196	58.28	25.23	Europe	Estonia	Kahvena				forest	temperate broadleaf forest	5.16162
G4197	58.45	24.77	Europe	Estonia	Taali				forest	temperate broadleaf forest	5.5831
G4198	58.45	24.76	Europe	Estonia	Taali m0is				anthropogenic	village	5.46068
G4199	58.46	24.78	Europe	Estonia	Raudivalja				forest	temperate broadleaf forest	5.97351
G4200	58.47	24.9	Europe	Estonia	Puussaare				anthropogenic	village	5.78405
G4201	58.57	25.28	Europe	Estonia	Kootsi				forest	temperate coniferous forest	5.11583
G4202	59.51	24.82	Europe	Estonia	Viimsi				forest	temperate broadleaf forest	5.78703
G4203	59.63	25.77	Europe	Estonia	Haldi				forest	temperate coniferous forest	5.85657
G4204	59.64	25.76	Europe	Estonia	Viinistu				forest	temperate broadleaf forest	4.06335
G4205	59.65	25.51	Europe	Estonia	Juminda				forest	temperate coniferous forest	2.12246
G4206	59.47	25.47	Europe	Estonia	S0itme				forest	temperate broadleaf forest	5.52754
G4207	59.49	25.29	Europe	Estonia	Ubari				forest	temperate broadleaf forest	5.86018
G4208	59.47	25.16	Europe	Estonia	Jagala J0esuu				forest	temperate broadleaf forest	5.36715
G4209	59.5	25.09	Europe	Estonia	ulgase Koljunukk				forest	temperate broadleaf forest	5.31108
G4210	58.96	24.04	Europe	Estonia	R0uma				forest	temperate broadleaf forest	5.67733
G4211	58.82	23.83	Europe	Estonia	Keskvere p0llusaar				forest	temperate broadleaf forest	5.7438
G4212	58.83	23.86	Europe	Estonia	Keskvere				forest	temperate broadleaf forest	4.95978
G4213	58.85	23.96	Europe	Estonia	Liivi m0is				anthropogenic	village	5.62425
G4214	58.93	24.18	Europe	Estonia	Laukna puisniit				woodland	temperate woodland	5.67919
G4215	58.95	24.21	Europe	Estonia	Leevre				forest	temperate coniferous forest	5.52649
G4216	59.37	24.59	Europe	Estonia	Tammetalu				forest	temperate broadleaf forest	5.94284
G4217	59.47	24.37	Europe	Estonia	Suurupi				forest	temperate broadleaf forest	1.48488
G4218	59.46	24.37	Europe	Estonia	Suurupi pank				anthropogenic	village	4.48817
G4219	59.32	24.35	Europe	Estonia	Valkse				forest	temperate broadleaf forest	5.40805
G4220	59.37	24.13	Europe	Estonia	Leetse				anthropogenic	village	4.91757
G4221	59.38	24.04	Europe	Estonia	Paldiski				woodland	temperate woodland	3.11486
G4221z	59.38	24.04	Europe	Estonia	Paldiski				woodland	temperate woodland	4.69102
G4222	59.38	24.04	Europe	Estonia	Paldiski				anthropogenic	village	4.58556
G4223	58.92	24.45	Europe	Estonia	Orgita m0is				anthropogenic	village	5.37303
G4224	58.93	24.39	Europe	Estonia	Rangu				woodland	temperate woodland	5.84999
G4225	58.77	24.25	Europe	Estonia	Vana-Vigala Hirvepark				forest	temperate broadleaf forest	5.456
G4226	58.67	24.48	Europe	Estonia	Libatse				woodland	temperate woodland	3.5374
G4227	58.67	24.5	Europe	Estonia	Arase				forest	temperate broadleaf forest	2.62811
G4228	58.77	24.47	Europe	Estonia	Velise				anthropogenic	village	4.90315
G4229	58.89	24.47	Europe	Estonia	Niidiaia tammik				woodland	temperate woodland	4.1464
G4230	59.43	24.74	Europe	Estonia	Tallinna Hirvepark				anthropogenic	urban	5.05742
G4231	59.45	24.86	Europe	Estonia	Tallinn	Pae			anthropogenic	rangeland	5.55875
G4232	59.1	24.82	Europe	Estonia	Seli m0isapark				anthropogenic	village	5.71143
G4233	59.1	24.92	Europe	Estonia	Hargla				forest	temperate broadleaf forest	5.39934
G4234	59.05	25.11	Europe	Estonia	Kuimetsa				woodland	temperate woodland	5.76779
G4235	59.05	25.02	Europe	Estonia	Atla				forest	temperate coniferous forest	4.90619
G4236	59.2	24.89	Europe	Estonia	Visja				forest	temperate broadleaf forest	5.54895
G4237	58.18	26.91	Europe	Estonia	Tsopi				forest	temperate broadleaf forest	5.74936
G4238	58.4	26.69	Europe	Estonia	Tartu Janeserada				anthropogenic	village	4.88006
G4239	59	27.74	Europe	Estonia	Vasknarva				forest	temperate broadleaf forest	5.79085
G4240	59.17	27.8	Europe	Estonia	Poruni				forest	temperate broadleaf forest	5.69293
G4241	59.11	27.58	Europe	Estonia	Kassisaare				forest	temperate coniferous forest	5.20064
G4242	58.67	26.76	Europe	Estonia	Saarem0isa				anthropogenic	village	5.1176
G4243	57.86	26.61	Europe	Estonia	Vaabina park				anthropogenic	village	5.44726
G4244	57.76	26.58	Europe	Estonia	Latiku				forest	temperate broadleaf forest	5.82643
G4245	57.62	26.61	Europe	Estonia	M0niste park				anthropogenic	village	5.78202
G4246	57.59	26.65	Europe	Estonia	Tundu				forest	temperate broadleaf forest	5.53156
G4247	57.58	26.61	Europe	Estonia	Luustoja				anthropogenic	village	5.80761
G4249	57.64	26.91	Europe	Estonia	Kellamae				forest	temperate coniferous forest	4.97356
G4250	57.64	27.04	Europe	Estonia	Raagi				anthropogenic	village	5.58851
G4251	58.39	25.74	Europe	Estonia	Uusna				forest	temperate broadleaf forest	5.68571
G4253	58.4	25.67	Europe	Estonia	Vana-V0idu				forest	temperate broadleaf forest	5.18275
G4254	58.4	25.66	Europe	Estonia	Vana-V0idu				forest	temperate broadleaf forest	5.12879
G4255	58.48	25.46	Europe	Estonia	Jaanioja				forest	temperate broadleaf forest	6.04433
G4256	58.47	25.55	Europe	Estonia	Surgavere				forest	temperate broadleaf forest	5.00136
G4257	58.36	25.59	Europe	Estonia	Viljandi	Valuoja park			anthropogenic	urban	2.54669
G4257z	58.36	25.59	Europe	Estonia	Viljandi	Valuoja park			anthropogenic	urban	5.75487
G4258	58.36	27.29	Europe	Estonia	Leego				forest	temperate coniferous forest	4.86783
G4259	58.28	27.38	Europe	Estonia	Haavametsa				forest	temperate broadleaf forest	6.17694
G4260	57.91	27.7	Europe	Estonia	Lutepaa				forest	temperate broadleaf forest	5.63136
G4261	57.94	27.29	Europe	Estonia	Meenikunno				forest	temperate coniferous forest	5.69024
G4262	58.1	26.01	Europe	Estonia	Kaubi				forest	temperate broadleaf forest	5.69636
G4264	58.1	25.9	Europe	Estonia	Riidaja				forest	temperate broadleaf forest	5.63025
G4265	58.04	25.8	Europe	Estonia	Rubina				forest	temperate broadleaf forest	5.62378
G4266	58.14	25.69	Europe	Estonia	Virsti				anthropogenic	village	6.10723
G4267	58.14	25.68	Europe	Estonia	Muti				forest	temperate coniferous forest	5.47701
G4268	59.03	25.64	Europe	Estonia	S0meru				forest	temperate broadleaf forest	5.1213
G4270	58.99	25.08	Europe	Estonia	Vana-Kaiu				forest	temperate broadleaf forest	5.42243
G4271	58.91	24.93	Europe	Estonia	Ohekatku				anthropogenic	village	5.69729
G4272	58.9	25.1	Europe	Estonia	Kadva				forest	temperate broadleaf forest	5.81064
G4273	58.92	25.18	Europe	Estonia	Saunametsa				forest	temperate broadleaf forest	5.48762
G4274	57.94	27.65	Europe	Estonia	Verhulitsa				forest	temperate broadleaf forest	5.21477
G4275	58.95	23.74	Europe	Estonia	Laanemaa	Taebla			woodland	temperate woodland	5.6308
G4276	58.93	23.59	Europe	Estonia	Laanemaa	Uuem0isa			woodland	temperate woodland	5.62556
G4277	59.08	22.64	Europe	Estonia	Hiiumaa	Tahkuna			forest	temperate broadleaf forest	5.69275
G4278	58.89	23	Europe	Estonia	Hiiumaa	Vahtrepa			forest	temperate coniferous forest	5.17343
G4279	58.88	22.96	Europe	Estonia	Hiiumaa	Puhalepa			woodland	temperate woodland	5.748
G4280	58.87	22.94	Europe	Estonia	Hiiumaa	Suurem0isa			woodland	temperate woodland	5.58382
G4281	58.82	23.07	Europe	Estonia	Hiiumaa	Kaevatsi			shrubland	temperate shrubland	5.46718
G4282	58.87	22.94	Europe	Estonia	Hiiumaa	Suurem0isa park			anthropogenic	village	4.44969
G4283	58.84	23.04	Europe	Estonia	Hiiumaa	Sarve			woodland	temperate woodland	4.83046
G4284	58.85	23	Europe	Estonia	Hiiumaa	Soonlepa			forest	temperate broadleaf forest	5.46291
G4285	58.8	22.84	Europe	Estonia	Hiiumaa	Kassari Esikula			forest	temperate broadleaf forest	4.94445
G4288	58.99	22.8	Europe	Estonia	Hiiumaa	Hausma			forest	temperate coniferous forest	5.53318
G4289	58.84	22.78	Europe	Estonia	Hiiumaa	Putkaste			woodland	temperate woodland	4.70766
G4291	58.76	22.8	Europe	Estonia	Hiiumaa	Kassari Saaretirp			woodland	temperate woodland	4.92621
G4296	58.79	22.83	Europe	Estonia	Hiiumaa	Kassari			anthropogenic	village	5.4869
G4297	58.99	22.44	Europe	Estonia	Hiiumaa	K0rgessaare ninaots			forest	temperate coniferous forest	5.42515
G4299	58.98	22.46	Europe	Estonia	Hiiumaa	K0rgessaare park			anthropogenic	village	4.41198
G4300	58.93	22.39	Europe	Estonia	Hiiumaa	Luidja			forest	temperate broadleaf forest	5.31575
G4301	58.83	22.63	Europe	Estonia	Hiiumaa	Mannamaa			forest	temperate broadleaf forest	5.38703
G4305	58.72	22.47	Europe	Estonia	Hiiumaa	Tohvri			forest	temperate coniferous forest	5.03278
G4306	58.7	22.52	Europe	Estonia	Hiiumaa	S0ru			forest	temperate broadleaf forest	4.99513
G4307	58.8	23.01	Europe	Estonia	Hiiumaa	Saarnaki			forest	temperate broadleaf forest	4.48424
G4308	58.74	23.13	Europe	Estonia	Hiiumaa	Ahelaid			forest	temperate broadleaf forest	5.51343
G4309	58.77	23.08	Europe	Estonia	Hiiumaa	Vareslaid			forest	temperate broadleaf forest	5.09467
G4310	58.95	23.63	Europe	Estonia	Laanemaa	Herjava			woodland	temperate woodland	5.09933
G4311	58.88	24.75	Europe	Estonia	Purku				anthropogenic	village	5.59613
G4312	58.69	24.97	Europe	Estonia	Kobra				forest	temperate broadleaf forest	5.56367
G4313	58.72	25.06	Europe	Estonia	V0idula				forest	temperate broadleaf forest	5.53784
G4342	58.06	27.31	Europe	Estonia	V0ukula				forest	temperate broadleaf forest	4.41422
G4343	58.13	27.33	Europe	Estonia	Saar0kula				woodland	temperate woodland	5.30646
G4344	58.17	27.3	Europe	Estonia	Terepi				forest	temperate broadleaf forest	5.72204
G4345	57.73	27.36	Europe	Estonia	Vana-Vastseliina park				woodland	temperate woodland	5.69146
G4346	57.76	27.48	Europe	Estonia	Serga				forest	temperate coniferous forest	5.4726
G4347	57.76	27.48	Europe	Estonia	Serga				forest	temperate broadleaf forest	5.35449
G4348	57.85	27.2	Europe	Estonia	Lasva				forest	temperate broadleaf forest	5.16448
G4349	58.64	24.32	Europe	Estonia	Helenurme				forest	temperate broadleaf forest	5.44165
G4350	58.61	24.18	Europe	Estonia	Naissoo				forest	temperate broadleaf forest	5.52303
G4351	58.62	24.04	Europe	Estonia	Tarva				forest	temperate broadleaf forest	5.03682
G4351z	58.62	24.04	Europe	Estonia	Tarva				forest	temperate broadleaf forest	4.85403
G4352	58.61	23.97	Europe	Estonia	Karin0mme				forest	temperate broadleaf forest	5.77425
G4353	58.69	23.69	Europe	Estonia	Petaaluse				forest	temperate broadleaf forest	5.62239
G4354	58.68	23.53	Europe	Estonia	M0isakula				woodland	temperate woodland	4.36873
G4355	58.46	23.83	Europe	Estonia	annikse				forest	temperate broadleaf forest	5.77205
G4356	58.56	23.72	Europe	Estonia	Vetla m0isapark				anthropogenic	village	5.2356
G4357	58.54	23.72	Europe	Estonia	Paadrema				forest	temperate broadleaf forest	5.24551
G4358	58.39	23.84	Europe	Estonia	Kolga				forest	temperate coniferous forest	5.52058
G4359	58.43	23.7	Europe	Estonia	Haapsi				forest	temperate broadleaf forest	5.11642
G4359y	58.43	23.7	Europe	Estonia	Haapsi				forest	temperate broadleaf forest	4.87846
G4359z	58.43	23.7	Europe	Estonia	Haapsi				forest	temperate broadleaf forest	4.8887
G4360	58.55	23.6	Europe	Estonia	Pivarootsi				forest	temperate broadleaf forest	4.59434
G4361	58.59	23.58	Europe	Estonia	Laelatu Kasselaht				forest	temperate broadleaf forest	5.07975
G4362	58.56	23.55	Europe	Estonia	Laanemaa	Puhtu			forest	temperate broadleaf forest	5.60879
G4363	58.65	23.62	Europe	Estonia	Massu park				anthropogenic	village	5.25523
G4363z	58.65	23.62	Europe	Estonia	Massu park				anthropogenic	village	5.38102
G4364	58.61	23.81	Europe	Estonia	Kunila				forest	temperate broadleaf forest	5.7015
G4365	59.49	26.52	Europe	Estonia	Linnuse park				anthropogenic	village	5.1511
G4366	59.51	26.54	Europe	Estonia	Kunda				forest	temperate broadleaf forest	5.05395
G4367	59.5	26.52	Europe	Estonia	Kunda				anthropogenic	urban	5.06176
G4368	59.51	26.57	Europe	Estonia	Simunamae				forest	temperate broadleaf forest	5.89631
G4372	58.7	26.91	Europe	Estonia	Kiisli				forest	temperate broadleaf forest	6.11676
G4374	58.6	27.13	Europe	Estonia	Alatskivi manor park				anthropogenic	village	4.90729
G4375	58.29	26.95	Europe	Estonia	Kriimani				anthropogenic	village	5.73518
G4376	58.04	26.76	Europe	Estonia	Sirvaste				forest	temperate broadleaf forest	5.7577
G4377	58.01	26.67	Europe	Estonia	Karste				anthropogenic	village	6.00884
G4378	58	26.68	Europe	Estonia	Karste				forest	temperate broadleaf forest	5.40569
G4379	57.54	26.45	Europe	Latvia	Markuze Gauda				anthropogenic	village	5.99343
G4380	57.52	26.49	Europe	Latvia	Gaujiena				forest	temperate broadleaf forest	5.91426
G4381	57.89	26.39	Europe	Estonia	Kakulaas				forest	temperate coniferous forest	5.76964
G4382	57.9	26.28	Europe	Estonia	Sangaste loss				forest	temperate broadleaf forest	5.84883
G4383	57.9	26.28	Europe	Estonia	Sangaste lossipark				anthropogenic	village	5.36697
G4384	57.93	26.24	Europe	Estonia	Tiidu				forest	temperate coniferous forest	5.17597
G4385	57.96	26.27	Europe	Estonia	Keeni park				anthropogenic	village	5.94365
G4386	57.7	26.46	Europe	Estonia	Kolski				forest	temperate coniferous forest	5.31218
G4388	57.51	26.61	Europe	Estonia	Naha				forest	temperate coniferous forest	5.75812
G4389	57.52	26.6	Europe	Estonia	Naha				forest	temperate broadleaf forest	6.04949
G4390	58.01	26.46	Europe	Estonia	Hobusemagi				forest	temperate broadleaf forest	5.88611
G4393	58.04	26.36	Europe	Estonia	Arula				forest	temperate broadleaf forest	5.77003
G4394	57.98	26.36	Europe	Estonia	Harimagi				forest	temperate broadleaf forest	5.49356
G4395	57.96	26.35	Europe	Estonia	Maekula				forest	temperate broadleaf forest	5.47085
G4396	57.95	26.38	Europe	Estonia	Restu				forest	temperate broadleaf forest	5.24154
G4401	57.92	26.64	Europe	Estonia	Urvastem0isa				anthropogenic	village	5.9196
G4402	57.97	26.59	Europe	Estonia	Kooraste Pikkjarve				forest	temperate broadleaf forest	5.61225
G4403	57.92	26.76	Europe	Estonia	Haamaste				anthropogenic	village	5.28801
G4404	59.39	27.46	Europe	Estonia	Kotinuka				forest	temperate broadleaf forest	5.97197
G4405	59.22	27.34	Europe	Estonia	Rajakula				forest	temperate broadleaf forest	5.69859
G4406	59.21	27.15	Europe	Estonia	Tarumaa				forest	temperate coniferous forest	5.50677
G4407	59.18	27.15	Europe	Estonia	Heinassaare				forest	temperate broadleaf forest	5.71636
G4410	58.12	25.55	Europe	Estonia	Polli				anthropogenic	village	5.76678
G4412	57.98	25.55	Europe	Estonia	Teringi				forest	temperate coniferous forest	5.28616
G4413	57.99	25.56	Europe	Estonia	Perakula				forest	temperate broadleaf forest	5.55103
G4414	58	25.55	Europe	Estonia	Lilli				forest	temperate broadleaf forest	5.65038
G4417	58.68	24.69	Europe	Estonia	Parnumaa	Vandra	Metsapere		forest	temperate broadleaf forest	5.32714
G4418	58.68	24.7	Europe	Estonia	Jarve				anthropogenic	village	5.88955
G4419	58.67	24.61	Europe	Estonia	Pööravere				forest	temperate coniferous forest	5.47157
G4420	58.67	24.62	Europe	Estonia	Parnumaa	Halinga	Pööravere		anthropogenic	village	5.49012
G4422	58.3	21.84	Europe	Estonia	Hulgeranna				forest	temperate broadleaf forest	4.59409
G4423	58.29	21.85	Europe	Estonia	Karala				forest	temperate broadleaf forest	5.27524
G4424	58.28	21.84	Europe	Estonia	Soeginina				forest	temperate broadleaf forest	5.46407
G4425	58.17	22.15	Europe	Estonia	Möldri				forest	temperate broadleaf forest	5.79049
G4426	58.35	21.97	Europe	Estonia	Kuusn0mme				forest	temperate broadleaf forest	5.82235
G4427	58.12	22.21	Europe	Estonia	Ansekula				forest	temperate broadleaf forest	5.72015
G4428	58.12	22.21	Europe	Estonia	Kaunispe				forest	temperate coniferous forest	4.7894
G4430	57.95	22.12	Europe	Estonia	M0ntu park				anthropogenic	village	5.74693
G4431	58.58	22.55	Europe	Estonia	Metskula				woodland	temperate woodland	5.96682
G4432	58.48	22.94	Europe	Estonia	Koigi				forest	temperate broadleaf forest	4.60809
G4434	58.54	24.07	Europe	Estonia	Kalli				woodland	temperate woodland	5.38241
G4435	58.48	24.33	Europe	Estonia	J00pre				anthropogenic	village	5.06836
G4436	58.43	24.29	Europe	Estonia	Parnumaa	Audru	Karbu		forest	temperate broadleaf forest	4.84031
G4444	58.54	26.28	Europe	Estonia	Altnurga				forest	temperate broadleaf forest	5.59328
G4445	58.55	26.38	Europe	Estonia	Puurmani				forest	temperate broadleaf forest	5.44601
G4446	58.58	26.44	Europe	Estonia	Sortsi				forest	temperate broadleaf forest	6.06299
G4448	58.62	26.29	Europe	Estonia	Maenda				anthropogenic	village	4.89479
G4449	58.7	26.14	Europe	Estonia	Kaavere				forest	temperate broadleaf forest	5.6305
G4450	58.02	24.68	Europe	Estonia	Nigula				forest	temperate broadleaf forest	5.26011
G4451	57.95	24.62	Europe	Estonia	Kolbergi				anthropogenic	village	5.58043
G4452	57.98	24.67	Europe	Estonia	Tuuliku				forest	temperate broadleaf forest	5.23597
G4453	58.03	24.73	Europe	Estonia	Reinu				forest	temperate broadleaf forest	0.712773
G4454	58.06	24.54	Europe	Estonia	Arumetsa				forest	temperate broadleaf forest	5.87368
G4455	57.53	27.33	Europe	Estonia	Parmu				forest	temperate coniferous forest	5.28632
G4456	57.44	27.3	Europe	Latvia	Ploskums				forest	temperate broadleaf forest	5.55199
G4457	57.5	27.1	Europe	Latvia	Lukumiesu				forest	temperate broadleaf forest	5.20411
G4458	57.63	27	Europe	Estonia	Luutsniku park				anthropogenic	village	5.57631
G4459	57.63	26.96	Europe	Estonia	Luutsniku				forest	temperate coniferous forest	5.50203
G4461	58.29	26.55	Europe	Estonia	N0o				forest	temperate broadleaf forest	5.54205
G4462	58.25	26.71	Europe	Estonia	Kambja				forest	temperate broadleaf forest	5.19433
G4463	59.43	25.02	Europe	Estonia	Maardu m0isapark				anthropogenic	village	5.79094
G4464	59.45	25.22	Europe	Estonia	Ruu				forest	temperate broadleaf forest	5.3434
G4465	59.45	25.27	Europe	Estonia	Kodasoo park				anthropogenic	village	5.87031
G4467	59.38	25.3	Europe	Estonia	Anija park				anthropogenic	village	4.7435
G4468	59.16	25.43	Europe	Estonia	Kulvandu				forest	temperate coniferous forest	5.00117
G4469	59.18	25.23	Europe	Estonia	Ravila				forest	temperate broadleaf forest	4.52805
G4470	59.18	25.22	Europe	Estonia	Ravila manor				forest	temperate broadleaf forest	5.40363
G4471	59.21	25.1	Europe	Estonia	Kose-Uuem0isa				forest	temperate broadleaf forest	5.64005
G4473	59.35	24.88	Europe	Estonia	Ameerikanurga				forest	temperate broadleaf forest	5.47067
G4474	59.35	24.96	Europe	Estonia	Vaskjala				forest	temperate broadleaf forest	5.32115
G4475	59.33	25.11	Europe	Estonia	Kalesi				forest	temperate broadleaf forest	5.35285
G4476	59.36	24.9	Europe	Estonia	Lehmja tammik				forest	temperate broadleaf forest	5.47698
G4477	57.9	26.28	Europe	Estonia	Sangaste m0isapark				anthropogenic	village	5.31731
G4492	57.9	26.28	Europe	Estonia	Lossikula				forest	temperate broadleaf forest	5.49822
G4495	59.03	25.71	Europe	Estonia	Roosna-Alliku park				anthropogenic	village	5.01554
G4496	59.1	25.7	Europe	Estonia	Seidla park				anthropogenic	village	4.84272
G4497	59.15	25.66	Europe	Estonia	Albu				forest	temperate broadleaf forest	5.22893
G4498	59.15	25.66	Europe	Estonia	Albu park				anthropogenic	village	5.32823
G4499	59.13	25.76	Europe	Estonia	Kurisoo				forest	temperate coniferous forest	5.56143
G4500	59.13	25.85	Europe	Estonia	Rava tammik				forest	temperate broadleaf forest	5.36433
G4501	59.12	25.85	Europe	Estonia	Rava				forest	temperate broadleaf forest	6.01237
G4502	59.11	25.8	Europe	Estonia	Orgmetsa				forest	temperate coniferous forest	5.61437
G4503	58.27	26.93	Europe	Estonia	Kalevipoja kunnivagu				forest	temperate broadleaf forest	5.81984
G4504	58.24	27.22	Europe	Estonia	Uus-Kastmeoja				anthropogenic	village	5.11722
G4505	58.27	27.07	Europe	Estonia	Imste				anthropogenic	village	5.86568
G4506	58.3	27.07	Europe	Estonia	Terikeste Hiieparna				anthropogenic	village	5.72153
G4507	58.38	26.96	Europe	Estonia	Saaskula				forest	temperate broadleaf forest	4.7782
G4508	58.41	26.96	Europe	Estonia	Saba				forest	temperate broadleaf forest	5.71657
G4510	58.66	25.26	Europe	Estonia	Kurgja				forest	temperate coniferous forest	5.58926
G4513	58.68	25.51	Europe	Estonia	Ollepa				forest	temperate broadleaf forest	5.56213
G4514	58.69	25.7	Europe	Estonia	Kurla				forest	temperate broadleaf forest	5.94689
G4515	58.4	25.85	Europe	Estonia	Surva Mursi parn				anthropogenic	village	4.78895
G4516	58.46	25.84	Europe	Estonia	Oja LKA				forest	temperate broadleaf forest	6.00144
G4517	58.46	25.83	Europe	Estonia	Parika				forest	temperate broadleaf forest	5.15557
G4518	58.35	25.61	Europe	Estonia	Sammuli				forest	temperate broadleaf forest	5.16506
G4519	58.35	25.54	Europe	Estonia	Pinska Ritsu tamm				forest	temperate broadleaf forest	5.84945
G4520	58.38	25.33	Europe	Estonia	Leppoja				forest	temperate broadleaf forest	5.4858
G4521	58.36	25.59	Europe	Estonia	Viljandi Valuoja park				anthropogenic	urban	5.35824
G4522	59	26.8	Europe	Estonia	P0rna				forest	temperate coniferous forest	5.38798
G4523	59.11	26.64	Europe	Estonia	Muuga m0isapark				anthropogenic	village	4.84568
G4524	59.17	26.59	Europe	Estonia	Roela				forest	temperate coniferous forest	5.7078
G4526	59.25	26.53	Europe	Estonia	Voore				forest	temperate coniferous forest	5.83774
G4527	59.28	26.78	Europe	Estonia	Sirtsi				forest	temperate coniferous forest	4.70447
G4528	59.29	26.88	Europe	Estonia	Jalastu				forest	temperate coniferous forest	6.03006
G4529	58.18	26.86	Europe	Estonia	Marga				forest	temperate broadleaf forest	5.255
G4530	50.81	4.38	Europe	Belgium	Brussels	Bois de la Cambre Ter Kamerenbos			anthropogenic	urban	1.79733
G4531	57.62	27.18	Europe	Estonia	Selisoo				forest	temperate coniferous forest	5.60465
G4532	57.64	27.09	Europe	Estonia	Ruusmae				forest	temperate broadleaf forest	5.86462
G4534	58.94	26.09	Europe	Estonia	Vainjarve m0isapark				anthropogenic	village	4.99978
G4535	58.94	26.07	Europe	Estonia	Ervita m0isapark				anthropogenic	village	5.64701
G4536	58.97	25.94	Europe	Estonia	Tudre				woodland	temperate woodland	5.57613
G4537	59.01	26.12	Europe	Estonia	Liigvalla				forest	temperate broadleaf forest	5.5914
G4537z	59.01	26.12	Europe	Estonia	Liigvalla				forest	temperate broadleaf forest	5.23469
G4538	58.95	26.38	Europe	Estonia	Salla m0isapark				anthropogenic	village	5.83387
G4540	57.73	26.92	Europe	Estonia	R0uge park				anthropogenic	village	5.82845
G4542	57.85	26.88	Europe	Estonia	Jalgimae				forest	temperate coniferous forest	5.72629
G4543	59.31	24.49	Europe	Estonia	Valingu				forest	temperate broadleaf forest	5.5235
G4544	59.39	24.42	Europe	Estonia	Vaana park				anthropogenic	village	5.60377
G4545	59.11	24.78	Europe	Estonia	Lohu				forest	temperate broadleaf forest	5.77419
G4546	59.06	24.67	Europe	Estonia	Raka				anthropogenic	village	5.7484
G4547	59.07	24.7	Europe	Estonia	Raka				forest	temperate broadleaf forest	5.4749
G4548	49.99	14.55	Europe	Czech Republic	Pruhonice Park				forest	temperate broadleaf forest	5.91205
G4549	50.02	14.53	Europe	Czech Republic	Praha	Botic-Milicov Park			forest	temperate broadleaf forest	5.44274
G4550	58.04	25.01	Europe	Estonia	Jaarja				forest	temperate broadleaf forest	5.61972
G4551	58.03	24.96	Europe	Estonia	Sookuninga				forest	temperate coniferous forest	5.30869
G4552	57.85	24.71	Europe	Latvia	Staicele				forest	temperate broadleaf forest	5.65934
G4553	57.86	24.54	Europe	Latvia	Mernieci				forest	temperate broadleaf forest	5.71826
G4554	58.36	26.89	Europe	Estonia	Luunja park				anthropogenic	village	5.31639
G4555	58.56	25.85	Europe	Estonia	Jaratvere park				anthropogenic	village	5.01985
G4556	58.66	25.97	Europe	Estonia	P0ltsamaa m0isapark				anthropogenic	urban	5.30691
G4557	59.55	24.81	Europe	Estonia	Leppneeme				forest	temperate coniferous forest	4.42324
G4558	59.44	24.52	Europe	Estonia	Rannam0isa				forest	temperate broadleaf forest	5.75558
G4559	59.44	24.5	Europe	Estonia	Rannam0isa				forest	temperate coniferous forest	5.2686
G4561	59.42	24.33	Europe	Estonia	Turisalu				forest	temperate broadleaf forest	5.68703
G4562	59.4	24.26	Europe	Estonia	Merem0isa				forest	temperate broadleaf forest	5.6616
G4563	59.41	24.8	Europe	Estonia	Peetri				forest	temperate broadleaf forest	5.28589
G4564	59.44	24.64	Europe	Estonia	Vaba0humuuseum				forest	temperate broadleaf forest	5.8168
G4596	57.84	27.2	Europe	Estonia	Lasva puisniit				woodland	temperate woodland	5.92235
G4597	57.95	27.12	Europe	Estonia	Perakula				forest	temperate coniferous forest	5.49959
G4599	58.08	26.01	Europe	Estonia	Liutsepa				forest	temperate broadleaf forest	5.03062
G4600	58.18	25.66	Europe	Estonia	Tuhalaane				anthropogenic	village	5.35252
G4602	58.03	26.92	Europe	Estonia	Tilleorg ristimand				forest	temperate broadleaf forest	5.92081
G4603	58.25	26.69	Europe	Estonia	Paali				forest	temperate broadleaf forest	5.83117
G4604	59.25	25.68	Europe	Estonia	Janeda park				anthropogenic	village	5.41215
G4605	59.25	25.64	Europe	Estonia	Uueveski				forest	temperate coniferous forest	5.5604
G4606	59.32	25.43	Europe	Estonia	Aruoja				forest	temperate broadleaf forest	5.51397
G4607	59.32	25.43	Europe	Estonia	Tallinn	Mustamae			forest	temperate broadleaf forest	5.66949
G4608	59.22	24.97	Europe	Estonia	Tuhala				forest	temperate broadleaf forest	5.02139
G4609	59.21	24.93	Europe	Estonia	Tammiku				forest	temperate broadleaf forest	5.3453
G4610	59.29	24.91	Europe	Estonia	Patika				forest	temperate broadleaf forest	5.49186
G4611	58.71	26.44	Europe	Estonia	Mustallika				forest	temperate broadleaf forest	5.34906
G4612	58.95	26.37	Europe	Estonia	Emumagi				woodland	temperate woodland	5.59216
G4613	58.75	26.63	Europe	Estonia	Teilma				forest	temperate broadleaf forest	4.97921
G4614	58.22	26.93	Europe	Estonia	Lootvina				grassland	flooded grassland	5.74783
G4615	58.22	26.93	Europe	Estonia	Alakula				anthropogenic	village	5.61287
G4616	59.36	24.15	Europe	Estonia	Leetse				forest	temperate broadleaf forest	5.64229
G4617	59.35	24.14	Europe	Estonia	Paldiski				anthropogenic	rangeland	5.62147
G4618	59.08	24.13	Europe	Estonia	Lepaste				forest	temperate broadleaf forest	5.95276
G4619	59.08	24.27	Europe	Estonia	Madila				woodland	temperate woodland	5.56848
G4620	59.22	24.14	Europe	Estonia	Padise				forest	temperate coniferous forest	5.84098
G4621	59.18	24.27	Europe	Estonia	Munalaskme				forest	temperate broadleaf forest	5.29655
G4622	59.21	23.93	Europe	Estonia	Hatu				woodland	temperate woodland	5.72125
G4623	59.19	23.83	Europe	Estonia	Tanavjarve				forest	temperate coniferous forest	5.14158
G4624	58.77	25.79	Europe	Estonia	Jalametsa				forest	temperate broadleaf forest	5.76143
G4625	58.74	25.8	Europe	Estonia	Imavere				anthropogenic	village	5.40288
G4626	59.08	26.76	Europe	Estonia	K0rve				forest	temperate coniferous forest	6.0403
G4627	59.11	26.76	Europe	Estonia	Tudusoo				forest	temperate coniferous forest	6.08565
G4628	59.15	26.83	Europe	Estonia	Suigu				forest	temperate broadleaf forest	5.77078
G4629	58.51	26.48	Europe	Estonia	Kamara				forest	temperate coniferous forest	5.01282
G4630	58.53	26.36	Europe	Estonia	Sinikula				forest	temperate broadleaf forest	6.0635
G4631	58.38	26.73	Europe	Estonia	Tartu Fortuuna				anthropogenic	urban	5.84202
G4632	57.73	27.06	Europe	Estonia	Vallamagi				forest	temperate broadleaf forest	5.79599
G4633	57.72	27.06	Europe	Estonia	Suur-Munamagi				forest	temperate coniferous forest	5.82704
G4634	57.54	26.94	Europe	Latvia	Delinkane				forest	temperate coniferous forest	5.75777
G4635	57.53	26.87	Europe	Latvia	Jaunlaicene				anthropogenic	village	5.68086
G4636	57.73	26.92	Europe	Estonia	R0uge				forest	temperate coniferous forest	5.13933
G4637	58.25	26.78	Europe	Estonia	Vana-Kuuste				anthropogenic	village	5.30251
G4638	58.39	26.89	Europe	Estonia	Savikoja				anthropogenic	urban	5.78028
G4639	58.36	25.59	Europe	Estonia	Viljandi Lossipark				anthropogenic	urban	4.10029
G4640	58.36	25.59	Europe	Estonia	Viljandi Lossipark				anthropogenic	urban	4.92663
G4641	58.37	26.63	Europe	Estonia	Viljandi Valuoja park				anthropogenic	urban	5.08225
G4642	58.37	25.59	Europe	Estonia	Viljandi Valuoja park				anthropogenic	urban	5.05847
G4643	58.47	25.44	Europe	Estonia	Kobruvere				anthropogenic	village	5.80115
G4644	58.4	25.6	Europe	Estonia	Karula jarv				woodland	temperate woodland	5.06342
G4645	59.22	25.04	Europe	Estonia	Saula				forest	temperate broadleaf forest	5.66232
G4646	59.4	25.9	Europe	Estonia	K0nnu				anthropogenic	village	5.71391
G4647	59.48	25.91	Europe	Estonia	Loobu				forest	temperate broadleaf forest	5.73397
G4648	59.58	25.95	Europe	Estonia	V0su				forest	temperate coniferous forest	5.33333
G4649	59.58	25.63	Europe	Estonia	Hara				forest	temperate coniferous forest	5.60412
G4650	59.58	25.63	Europe	Estonia	Hara				forest	temperate coniferous forest	5.23306
G4651	59.42	24.66	Europe	Estonia	Tallinn Zoo				anthropogenic	urban	5.24934
G4652	59.44	24.53	Europe	Estonia	Rannam0isa pank				forest	temperate broadleaf forest	5.34507
G4653	59.44	24.79	Europe	Estonia	Kadriorg Russalka				anthropogenic	urban	5.82972
G4666	59.07	24.76	Europe	Estonia	M0isaaseme				woodland	temperate woodland	5.77828
G4667	59.06	24.76	Europe	Estonia	M0isaaseme				woodland	temperate woodland	4.78634
G4669	59.03	24.95	Europe	Estonia	Ingliste				forest	temperate broadleaf forest	5.61672
G4670	59.37	24.78	Europe	Estonia	Raudalu				woodland	temperate woodland	5.93105
G4671	59.47	24.88	Europe	Estonia	Tallinn Botanical Gardens				anthropogenic	urban	5.62053
G4672	59.47	24.88	Europe	Estonia	Tallinn Botanical Gardens				forest	temperate broadleaf forest	5.80875
G4673	58.02	26.93	Europe	Estonia	Puskaru Tilleorg				forest	temperate coniferous forest	5.52268
G4675	58.25	22.04	Europe	Estonia	Kipi				woodland	temperate woodland	5.31172
G4676	58.26	22.03	Europe	Estonia	Varpe				woodland	temperate woodland	5.3293
G4677	58.26	21.91	Europe	Estonia	Karala				forest	temperate broadleaf forest	3.43131
G4678	58.25	22.01	Europe	Estonia	Pussa				forest	temperate broadleaf forest	5.45775
G4679	59.62	24.99	Europe	Estonia	Prangli Rivimaa				forest	temperate broadleaf forest	5.95069
G4680	59.62	24.99	Europe	Estonia	Prangli Rivimaa				forest	temperate broadleaf forest	5.67931
G4681	59.62	25	Europe	Estonia	Prangli Rivimaa				forest	temperate broadleaf forest	5.38199
G4682	59.63	25	Europe	Estonia	Prangli Kelnase				forest	temperate coniferous forest	5.29245
G4683	59.41	24.8	Europe	Estonia	ulemiste				forest	temperate broadleaf forest	5.10283
G4684	58.37	26.81	Europe	Estonia	P0vvatu				anthropogenic	village	5.58142
G4685	57.81	27.05	Europe	Estonia	Verijarve				forest	temperate coniferous forest	5.68278
G4686	57.79	27.17	Europe	Estonia	Tammes00r				forest	temperate broadleaf forest	5.84127
G4687	57.8	27.16	Europe	Estonia	Kutiorg				forest	temperate coniferous forest	5.961
G4688	58.37	26.8	Europe	Estonia	Lohkva				grassland	temperate grassland	6.12807
G4689	58.32	25.9	Europe	Estonia	Riuma				anthropogenic	village	5.45502
G4690	58.3	25.82	Europe	Estonia	M0nnaste				anthropogenic	village	5.74769
G4691	58.23	25.9	Europe	Estonia	Tarvastu				anthropogenic	village	5.02075
G4692	58.25	25.69	Europe	Estonia	Kivikula				forest	temperate broadleaf forest	5.85003
G4693	58.28	25.58	Europe	Estonia	Loodi				forest	temperate broadleaf forest	5.141
G4694	58.34	25.46	Europe	Estonia	Marna				forest	temperate broadleaf forest	5.86011
G4695	58.64	26.7	Europe	Estonia	K0renduse				forest	temperate broadleaf forest	5.11672
G4696	58.74	26.65	Europe	Estonia	Imukvere				forest	temperate broadleaf forest	5.61747
G4697	58.77	26.57	Europe	Estonia	Kivijarve				anthropogenic	village	5.68969
G4698	58.99	26.32	Europe	Estonia	Tammiku				forest	temperate broadleaf forest	5.88157
G4699	58.98	26.26	Europe	Estonia	Rakke				forest	temperate broadleaf forest	5.70059
G4700	58.98	26.05	Europe	Estonia	Koeru				forest	temperate coniferous forest	5.45744
G4701	58.36	26.64	Europe	Estonia	Marja				anthropogenic	village	5.06209
G4702	57.72	27.05	Europe	Estonia	Haanja				forest	temperate broadleaf forest	4.37525
G4703	59.22	27.33	Europe	Estonia	Maetaguse				forest	temperate broadleaf forest	5.74026
G4704	59.22	27.35	Europe	Estonia	Uhe				forest	temperate broadleaf forest	5.19995
G4705	59.26	27.58	Europe	Estonia	Kurtna				forest	temperate coniferous forest	5.6229
G4706	59.27	27.51	Europe	Estonia	Kurtna park				anthropogenic	village	5.30946
G4723	58.63	23.43	Europe	Estonia	Kesselaid				forest	temperate broadleaf forest	5.42198
G4724	58.73	23.97	Europe	Estonia	Kirbla				anthropogenic	village	5.32288
G4725	58.56	23.55	Europe	Estonia	Lihula				anthropogenic	village	5.29463
G4726	59	23.25	Europe	Estonia	Hullo				forest	temperate broadleaf forest	5.40441
G4727	58.99	23.19	Europe	Estonia	Suurem0isa park				anthropogenic	village	5.21861
G4728	59.01	23.2	Europe	Estonia	Fallarna				forest	temperate broadleaf forest	5.73663
G4729	59.02	23.2	Europe	Estonia	Borrby				forest	temperate coniferous forest	5.34295
G4730	58.67	23.7	Europe	Estonia	Petaaluse				woodland	temperate woodland	5.59802
G4732	58.74	23.67	Europe	Estonia	Keemu				forest	temperate broadleaf forest	4.57598
G4733	58.24	24.61	Europe	Estonia	Maarjapeakse				forest	temperate broadleaf forest	5.75197
G4734	58.03	24.66	Europe	Estonia	Urissaare				forest	temperate broadleaf forest	5.71458
G4735	58.02	24.64	Europe	Estonia	Urissaare				forest	temperate broadleaf forest	5.6792
G4736	58.16	26.23	Europe	Estonia	R0ngu Lossimae				forest	temperate broadleaf forest	5.2344
G4737	58.15	26.25	Europe	Estonia	R0ngu				forest	temperate coniferous forest	5.56112
G4738	58.2	26.31	Europe	Estonia	Tammiste				anthropogenic	village	5.09057
G4739	58.14	26.36	Europe	Estonia	Urmi				grassland	temperate grassland	5.24897
G4740	58.05	25.4	Europe	Estonia	Penuja				anthropogenic	village	5.50883
G4741	58.05	25.39	Europe	Estonia	Penuja				anthropogenic	village	5.80747
G4742	58.14	25.26	Europe	Estonia	Luutre				forest	temperate broadleaf forest	5.90407
G4743	58.13	25.27	Europe	Estonia	Killi				forest	temperate broadleaf forest	6.01294
G4744	57.76	26.19	Europe	Estonia	Niklusemagi				forest	temperate coniferous forest	5.89507
G4745	57.75	26.22	Europe	Estonia	Pugritsa				anthropogenic	village	5.3496
G4746	57.6	26.35	Europe	Estonia	Karjam0isa				forest	temperate broadleaf forest	5.86016
G4747	57.59	26.32	Europe	Estonia	Tsirgumae				forest	temperate broadleaf forest	5.80407
G4748	57.59	26.32	Europe	Estonia	Karjam0isa				woodland	temperate woodland	5.70698
G4749	58.3	26.59	Europe	Estonia	Jariste				forest	temperate coniferous forest	4.16234
G4750	58.35	26.66	Europe	Estonia	Rani				forest	temperate coniferous forest	5.44939
G4751	59.31	26.46	Europe	Estonia	M0driku				forest	temperate broadleaf forest	5.88774
G4752	59.32	26.58	Europe	Estonia	Aasuvalja				forest	temperate broadleaf forest	5.81249
G4753	59.31	26.14	Europe	Estonia	Neeruti				forest	temperate broadleaf forest	5.81264
G4754	59.26	26.23	Europe	Estonia	Lasila				forest	temperate broadleaf forest	5.66772
G4755	59.28	26.25	Europe	Estonia	Jarni				woodland	temperate woodland	5.78341
G4756	59.05	26.23	Europe	Estonia	antu				forest	temperate coniferous forest	5.6786
G4757	58.24	26.68	Europe	Estonia	Virulase				forest	temperate coniferous forest	3.81804
G4759	58.38	26.56	Europe	Estonia	R0hu				forest	temperate broadleaf forest	4.80732
G4760	58.53	26.71	Europe	Estonia	Salukula				forest	temperate coniferous forest	5.39373
G4761	58.28	25.58	Europe	Estonia	Loodi				forest	temperate coniferous forest	5.18612
G4762	58.28	25.58	Europe	Estonia	Loodi				forest	temperate coniferous forest	5.70474
G4763	58.18	25.68	Europe	Estonia	Tuhalaane				anthropogenic	village	5.6386
G4764	58.18	25.74	Europe	Estonia	Paluvere				forest	temperate broadleaf forest	5.79112
G4765	58.29	25.88	Europe	Estonia	Valuste				forest	temperate broadleaf forest	5.3759
G4766	58.34	25.78	Europe	Estonia	Ruudikula				anthropogenic	village	5.82819
G4767	58.36	25.76	Europe	Estonia	Saarekula				anthropogenic	village	5.76115
G4768	58.98	25.59	Europe	Estonia	Purdi				forest	temperate coniferous forest	5.48727
G4769	59.27	24.55	Europe	Estonia	Koppelmaa				forest	temperate broadleaf forest	5.67973
G4770	59.07	24.48	Europe	Estonia	Ubasalu				forest	temperate broadleaf forest	5.59302
G4771	59.01	24.57	Europe	Estonia	Ohekatku				anthropogenic	village	6.05058
G4772	58.96	24.3	Europe	Estonia	Kohatu				woodland	temperate woodland	5.27002
G4773	59.28	24.46	Europe	Estonia	Tuula				anthropogenic	village	5.80435
G4774	59.23	24.14	Europe	Estonia	Padise				forest	temperate broadleaf forest	4.96142
G4775	59.31	23.93	Europe	Estonia	Suur-Pakri Suurkula				anthropogenic	village	5.27859
G4776	59.34	23.92	Europe	Estonia	Suur-Pakri austr-nabban				woodland	temperate woodland	4.52534
G4777	59.33	23.93	Europe	Estonia	Suur-Pakri Hars-hamani				grassland	flooded grassland	5.67139
G4778	59.38	24.04	Europe	Estonia	Paldiski				anthropogenic	rangeland	6.19222
G4779	59.26	24.14	Europe	Estonia	Kari				anthropogenic	village	4.55247
G4780	58.93	23.49	Europe	Estonia	Ungru				forest	temperate coniferous forest	5.69833
G4781	58.92	23.55	Europe	Estonia	Valgevalja				forest	temperate coniferous forest	5.63598
G4782	58.78	23.49	Europe	Estonia	Puise				forest	temperate broadleaf forest	5.86123
G4783	58.78	23.55	Europe	Estonia	Kiideva				anthropogenic	village	5.29971
G4784	58.79	23.53	Europe	Estonia	Koidu				forest	temperate broadleaf forest	5.56875
G4785	59	23.74	Europe	Estonia	Mae				forest	temperate broadleaf forest	5.85564
G4786	59.23	24.01	Europe	Estonia	Harju-Risti				forest	temperate broadleaf forest	4.80169
G4787	59.39	24.3	Europe	Estonia	Keila-Joa				forest	temperate broadleaf forest	5.72329
G4788	59.43	24.55	Europe	Estonia	Tabasalu				forest	temperate broadleaf forest	6.19743
G4789	59.47	25.28	Europe	Estonia	Haavakannu				woodland	temperate woodland	5.85458
G4790	59.47	25.3	Europe	Estonia	P0hjakivi				woodland	temperate woodland	5.22588
G4791	57.91	26.27	Europe	Estonia	Sangaste Lossikula				forest	temperate coniferous forest	5.56939
G4792	57.84	26.41	Europe	Estonia	Tagula				forest	temperate broadleaf forest	5.87861
G4793	57.86	26.52	Europe	Estonia	Vana-Antsla				anthropogenic	village	5.53785
G4794	57.92	26.52	Europe	Estonia	L0htsuu				forest	temperate broadleaf forest	5.963
G4795	58.75	26.5	Europe	Estonia	V0ikvere				forest	temperate broadleaf forest	5.39267
G4796	58.76	26.51	Europe	Estonia	Alavere				anthropogenic	village	5.88692
G4797	58.55	26.93	Europe	Estonia	Alaj0e				forest	temperate coniferous forest	5.93426
G4798	58.44	25.51	Europe	Estonia	Hussari				forest	temperate broadleaf forest	5.81733
G4799	58.41	25.29	Europe	Estonia	Lubjassaare				forest	temperate coniferous forest	4.67994
G4800	58.42	25.23	Europe	Estonia	Tuhkja				forest	temperate broadleaf forest	5.82146
G4801	58.48	24.99	Europe	Estonia	Riisa				anthropogenic	village	6.20197
G4802	58.45	25.06	Europe	Estonia	Karuskose				forest	temperate coniferous forest	5.86888
G4803	58.06	26.34	Europe	Estonia	Meegaste				forest	temperate broadleaf forest	6.03513
G4804	58.02	26.06	Europe	Estonia	Soontaga				forest	temperate coniferous forest	4.88205
G4805	58.14	25.92	Europe	Estonia	Roosilla				forest	temperate broadleaf forest	5.9532
G4806	58.14	25.93	Europe	Estonia	Roosilla				anthropogenic	cropland	5.36051
G4807	58.11	26.18	Europe	Estonia	Valjaotsa				forest	temperate broadleaf forest	5.89978
G4808	58.13	26.18	Europe	Estonia	Koruste				anthropogenic	cropland	5.82741
G4809	58.36	25.42	Europe	Estonia	Puiatu				anthropogenic	village	5.26642
G4810	58.27	25.18	Europe	Estonia	Riimaru				forest	temperate coniferous forest	6.05455
G4811	58.3	25.45	Europe	Estonia	Vanausse				anthropogenic	village	4.77959
G4812	58.33	25.51	Europe	Estonia	Pari				forest	temperate coniferous forest	5.71536
G4813	57.69	27.38	Europe	Estonia	Miikse				forest	temperate coniferous forest	5.36634
G4920	57.56	26.55	Europe	Estonia	Siksalakolk				forest	temperate coniferous forest	4.88833
G4921	57.56	26.53	Europe	Estonia	Villike				forest	temperate broadleaf forest	5.88795
G4922	57.57	26.53	Europe	Estonia	Tiitsa				anthropogenic	village	5.34621
G4923	58.4	26.74	Europe	Estonia	Vahi				anthropogenic	village	5.5608
G4924	59.27	24.69	Europe	Estonia	Kiisa				woodland	temperate woodland	4.7147
G4925	59	24.62	Europe	Estonia	Palamulla				forest	temperate coniferous forest	5.37298
G4926	59	24.65	Europe	Estonia	Lipstu				woodland	temperate woodland	5.39351
G4938	57.84	27	Europe	Estonia	V0ru				anthropogenic	urban	5.82196
G4939	58.63	23.43	Europe	Estonia	Kesselaid SW				forest	temperate coniferous forest	5.12037
G4940	58.63	23.44	Europe	Estonia	Kesselaid NE				woodland	temperate woodland	5.31404
G4941	58.69	23.59	Europe	Estonia	Salevere Salumagi				forest	temperate broadleaf forest	5.44006
G4942	58.56	23.55	Europe	Estonia	Puhtu N				forest	temperate broadleaf forest	5.30217
G4943	58.56	23.72	Europe	Estonia	Vatla Park				anthropogenic	village	4.89415
G4944	58.65	23.66	Europe	Estonia	Voosemetsa				forest	temperate coniferous forest	5.22108
G4944z	58.65	23.66	Europe	Estonia	Voosemetsa				forest	temperate coniferous forest	5.02701
G4945	59.44	25.16	Europe	Estonia	Koogi				forest	temperate broadleaf forest	5.20964
G4946	59.36	24.71	Europe	Estonia	Manniku				anthropogenic	village	5.58352
G5002	59.58	24.54	Europe	Estonia	Naissaar Taani aed				forest	temperate broadleaf forest	5.54531
G5003	59.56	24.55	Europe	Estonia	Naissaar port				forest	temperate coniferous forest	4.27907
G5004	60.48	25.15	Europe	Finland	Lemmenlaakso				forest	tropical broadleaf forest	5.57979
G5005	61.9	26.04	Europe	Finland	Leivonmaki				forest	temperate coniferous forest	5.1354
G5006	62.84	25.48	Europe	Finland	Puha-Hakin NP				forest	temperate coniferous forest	5.02028
G5007	63.2	24.19	Europe	Finland	Koirasalmi				forest	temperate coniferous forest	4.80004
G5008	63.41	23.92	Europe	Finland	Sillanpaa				grassland	temperate grassland	5.60622
G5009	61.91	23.4	Europe	Finland	Seitseman NP				forest	temperate coniferous forest	4.3261
G5010	61.85	24.29	Europe	Finland	Hyytiala				forest	temperate coniferous forest	5.82772
G5011	60.21	24.96	Europe	Finland	Helsinki				anthropogenic	urban	5.18775
G5049	60.2	24.87	Europe	Finland	Helsinki	Munkinpuisto			anthropogenic	urban	6.1273
G5050	58.36	26.78	Europe	Estonia	Ihaste				forest	temperate broadleaf forest	4.93914
G5051	58.43	23.74	Europe	Estonia	Varbla Park				anthropogenic	village	4.86239
G5052	58.35	25.55	Europe	Estonia	Pinska				anthropogenic	rangeland	4.62265
G5053	58.36	26.52	Europe	Estonia	R0hu katsebaas	MycoPhyl			grassland	temperate grassland	5.35207
G5054	58.36	26.52	Europe	Estonia	R0hu katsebaas	Alleys			anthropogenic	village	5.14171
G5055	58.36	26.52	Europe	Estonia	R0hu katsebaas	Salix			anthropogenic	village	4.59984
G5056	58.36	26.52	Europe	Estonia	R0hu katsebaas	Poplar			anthropogenic	village	4.99185
G5057	58.36	26.52	Europe	Estonia	R0hu katsebaas	CO2			grassland	temperate grassland	5.43332
G5058	58.36	26.66	Europe	Estonia	0ssu	Karja 10			anthropogenic	village	5.68449
G5059	50.8	4.49	Europe	Belgium	Tervuren				forest	temperate broadleaf forest	4.9299
G5060	50.03	4.72	Europe	France	Givet				forest	temperate broadleaf forest	3.59891
G5061	49.62	5.89	Europe	Luxembourg	Grass				forest	temperate broadleaf forest	5.38367
G5062	50.77	5.97	Europe	Netherlands	Epenesbaan				forest	temperate broadleaf forest	1.76469
G5063	50.77	5.96	Europe	Netherlands	Vijlne Rugveg				forest	temperate coniferous forest	4.27716
G5064	51.25	5.77	Europe	Netherlands	Weert				forest	temperate broadleaf forest	5.14732
G5118	28.53	-16.28	Europe	Spain	Tenerife	Mirador de Cruz de Carmen			forest	subtropical broadleaf forest	5.10219
G5119	28.53	-16.29	Europe	Spain	Tenerife	Mirador de Jardine			forest	subtropical broadleaf forest	5.50575
G5120	28.13	-16.71	Europe	Spain	Tenerife	Barranco del Inferno			shrubland	xeric shrubland	5.5109
G5121	28.17	-16.64	Europe	Spain	Tenerife	Vilaflor			forest	subtropical coniferous forest	5.65775
G5122	28.04	-16.71	Europe	Spain	Tenerife	Llano de las Mesas			shrubland	xeric shrubland	5.12776
G5125	28.23	-16.63	Europe	Spain	Tenerife	Roques de Garcia			shrubland	xeric shrubland	5.14178
G5124	28.42	-16.38	Europe	Spain	Tenerife	La Reina			forest	subtropical coniferous forest	5.37244
G5123	28.11	-16.62	Europe	Spain	Tenerife	La Tafetana			shrubland	subtropical shrubland	5.6749
G5126	28.52	-16.29	Europe	Spain	Tenerife	Las Mercedes			forest	subtropical broadleaf forest	5.36055
G5127	45.79	8.57	Europe	Italy	Monte Albano				forest	temperate broadleaf forest	5.12797
G5128	45.79	8.6	Europe	Italy	Quassa				forest	temperate broadleaf forest	5.63542
G5129	45.77	8.59	Europe	Italy	Oasis of Bruschera				forest	temperate broadleaf forest	5.80771
G5130	45.77	8.6	Europe	Italy	Angera				grassland	temperate grassland	5.79385
G5131	46.15	8.19	Europe	Italy	San Bernardo				forest	temperate coniferous forest	5.90787
G5132	46.12	8.2	Europe	Italy	Boca				forest	temperate broadleaf forest	5.78116
G5133	45.97	7.94	Europe	Italy	Pecetto				grassland	montane grassland	6.01896
G5146	60.28	24.96	Europe	Finland	Tammisto				forest	temperate broadleaf forest	5.55239
G5147	70.29	25.13	Europe	Norway	Kolvik				tundra	tundra	5.44266
G5148	71.16	25.77	Europe	Norway	Nordkapp				tundra	tundra	5.92419
G5149	70.81	24.64	Europe	Norway	Snefjord				forest	subpolar coniferous forest	5.81933
G5150	70.61	24.62	Europe	Norway	Kokelv				grassland	temperate grassland	5.25869
G5151	70.11	23.49	Europe	Norway	Leirbotndalen				forest	subpolar coniferous forest	5.6623
G5152	69.99	23.29	Europe	Norway	Alta				forest	temperate broadleaf forest	6.03836
G5153	70.02	22.06	Europe	Norway	Alteidet				forest	subpolar coniferous forest	4.68012
G5154	69.95	22.04	Europe	Norway	Burfjord				forest	temperate broadleaf forest	5.46565
G5155	69.5	20.82	Europe	Norway	Birtavarre				grassland	temperate grassland	5.48637
G5156	69.36	21.12	Europe	Norway	Stuoranjarga				tundra	tundra	6.09823
G5157	65.06	25.4	Europe	Finland	Letonniemi				forest	temperate broadleaf forest	5.38127
G5158	57.91	27.32	Europe	Estonia	Ootsipalu				forest	temperate coniferous forest	5.89014
G5183	58.37	26.68	Europe	Estonia	Tartu	Saialille			anthropogenic	urban	5.13022
G5187	58.42	26.66	Europe	Estonia	Vorbuse park				anthropogenic	village	4.88872
G5189	58.43	26.79	Europe	Estonia	Möllatsi				anthropogenic	rangeland	5.04159
G5190	58.27	26.84	Europe	Estonia	Villemi				anthropogenic	rangeland	5.79233
G5191	58.21	26.59	Europe	Estonia	Pangodi				forest	temperate broadleaf forest	5.59721
G5192	58.28	26.77	Europe	Estonia	T00raste				forest	temperate broadleaf forest	5.6986
G5193	58.47	26.68	Europe	Estonia	V0ibla				forest	temperate coniferous forest	5.2608
G5194	58.45	26.71	Europe	Estonia	Maramaa				forest	temperate broadleaf forest	4.98468
G5195	58.37	26.58	Europe	Estonia	Tartu	Ringtee			forest	temperate coniferous forest	5.18883
G5196	58.37	26.68	Europe	Estonia	Tartu	Ringtee			anthropogenic	rangeland	5.23465
G5197	58.18	26.8	Europe	Estonia	Aksi				forest	temperate broadleaf forest	5.27498
G5198	59.23	26.27	Europe	Estonia	Assamalla				forest	temperate broadleaf forest	4.99589
G5199	59.47	26.48	Europe	Estonia	Kunda-Aru				forest	temperate broadleaf forest	5.07845
G5200	59.48	26.5	Europe	Estonia	Ojakula				forest	temperate broadleaf forest	5.27672
G5201	59.53	26.47	Europe	Estonia	Toolse linnus				forest	temperate broadleaf forest	5.63377
G5202	59.5	26.52	Europe	Estonia	Kunda				anthropogenic	urban	5.00059
G5203	59.5	26.51	Europe	Estonia	Kunda				anthropogenic	urban	5.44329
G5204	59.52	26.54	Europe	Estonia	Kunda sadam				forest	temperate broadleaf forest	5.15963
G5206	59.5	26.61	Europe	Estonia	Kuura				forest	temperate broadleaf forest	4.51758
G5207	59.5	26.58	Europe	Estonia	Malla				forest	temperate broadleaf forest	4.62419
G5208	59.49	26.54	Europe	Estonia	Kunda				forest	temperate broadleaf forest	5.31995
G5209	58.36	26.69	Europe	Estonia	Tartu	Riia			anthropogenic	urban	5.3633
G5211	58.18	26.82	Europe	Estonia	Voorekula				forest	temperate coniferous forest	5.01673
G5212	58.38	25.61	Europe	Estonia	Peelim0isa				forest	temperate broadleaf forest	5.78044
G5213	58.38	25.6	Europe	Estonia	Viljandi				anthropogenic	urban	5.02192
G5214	58.38	25.59	Europe	Estonia	Viljandi				anthropogenic	urban	5.06112
G5215	58.37	25.59	Europe	Estonia	Viljandi				anthropogenic	urban	5.57305
G5216	58.37	25.59	Europe	Estonia	Viljandi				anthropogenic	urban	5.24117
G5217	58.36	25.6	Europe	Estonia	Viljandi				forest	temperate broadleaf forest	4.58401
G5218	58.36	25.61	Europe	Estonia	Viljandi				anthropogenic	urban	5.45785
G5219	59.35	24.5	Europe	Estonia	Puha				forest	temperate broadleaf forest	4.87659
G5220	59.33	24.35	Europe	Estonia	Niitvalja				forest	temperate broadleaf forest	4.90491
G5221	59.34	24.2	Europe	Estonia	P0llkula				forest	temperate broadleaf forest	5.51477
G5222	59.37	24.04	Europe	Estonia	Paldiski				forest	temperate broadleaf forest	5.50384
G5223	59.42	24.77	Europe	Estonia	Tallinn	Jarvevana			forest	temperate broadleaf forest	5.46218
G5224	59.45	24.69	Europe	Estonia	Tallinn	Stroomi			anthropogenic	urban	4.59241
G5225	59.4	24.71	Europe	Estonia	Tallinn	Mustamae			anthropogenic	urban	5.18122
G5226	57.91	26.99	Europe	Estonia	Parksepa				forest	temperate broadleaf forest	5.54257
G5227	57.98	26.87	Europe	Estonia	P0lgaste				anthropogenic	village	5.67528
G5228	58.31	26.58	Europe	Estonia	N0giaru				anthropogenic	village	5.79959
G5229	58.39	26.72	Europe	Estonia	Tartu	Emaj0e			anthropogenic	urban	5.72017
G5230	58.36	26.74	Europe	Estonia	Tartu	Tigutorn			anthropogenic	urban	5.19228
G5231	58.24	26.7	Europe	Estonia	Kambja				anthropogenic	village	5.69098
G5232	58.25	26.89	Europe	Estonia	Aadami				forest	temperate broadleaf forest	5.59275
G5233	58.4	26.77	Europe	Estonia	Tartu	Raadi			anthropogenic	rangeland	6.06087
G5234	58.38	26.77	Europe	Estonia	Tartu	R00mu			anthropogenic	urban	5.77211
G5235	58.38	26.77	Europe	Estonia	Tartu	R00mu			anthropogenic	urban	6.0999
G5236	58.39	26.8	Europe	Estonia	Rooba				forest	temperate broadleaf forest	5.86885
G5237	58.61	26.2	Europe	Estonia	Pikknurme				forest	temperate coniferous forest	5.46081
G5238	58.65	26.01	Europe	Estonia	Annikvere				anthropogenic	village	5.28778
G5239	58.66	25.97	Europe	Estonia	P0ltsamaa				anthropogenic	urban	5.11503
G5240	58.66	25.97	Europe	Estonia	P0ltsamaa				anthropogenic	urban	5.65
G5241	58.74	25.81	Europe	Estonia	Kiigevere				anthropogenic	village	5.12387
G5242	58.09	27.09	Europe	Estonia	Himmaste				anthropogenic	village	5.63782
G5243	58.37	26.85	Europe	Estonia	Luunja				anthropogenic	village	5.6831
G5244	58.47	26.71	Europe	Estonia	Vasula aed				anthropogenic	village	5.33805
G5245	58.23	27.31	Europe	Estonia	Sikakurmu				forest	temperate broadleaf forest	4.84499
G5246	58.35	26.62	Europe	Estonia	Haage				anthropogenic	village	5.24292
G5247	59.11	26.23	Europe	Estonia	Ebavere				anthropogenic	village	4.63266
G5248	59.31	26.32	Europe	Estonia	T0rma				anthropogenic	village	5.03707
G5250	58.32	25.53	Europe	Estonia	N0giaru				anthropogenic	village	5.62545
G5251	59.41	27.67	Europe	Estonia	Vaivina				woodland	temperate woodland	5.49056
G5252	59.39	27.78	Europe	Estonia	Sillamae				woodland	temperate woodland	6.00886
G5253	59.38	27.36	Europe	Estonia	Kukruse				anthropogenic	village	5.67687
G5254	59.41	27.11	Europe	Estonia	Moldova				anthropogenic	village	6.06304
G5255	59.39	28.19	Europe	Estonia	Narva				anthropogenic	urban	6.0292
G5256	59.4	28.07	Europe	Estonia	Peeterristi				forest	temperate broadleaf forest	4.87097
G5257	58.36	26.39	Europe	Estonia	Ramsi				forest	temperate broadleaf forest	4.61829
G5258	58.35	26.68	Europe	Estonia	Tartu	FI			anthropogenic	urban	5.87026
G5259	58.63	26.39	Europe	Estonia	Söe arboretum				forest	temperate coniferous forest	6.00123
G5260	58.63	26.39	Europe	Estonia	Söe arboretum				forest	temperate coniferous forest	5.91291
G5261	58.64	26.38	Europe	Estonia	Söe arboretum				forest	temperate coniferous forest	5.92401
G5262	58.58	26.7	Europe	Estonia	Kaiavere				anthropogenic	village	5.74903
G5263	58.05	27.04	Europe	Estonia	P0lva				anthropogenic	urban	5.40633
G5264	59.35	26.35	Europe	Estonia	Rakvere				anthropogenic	urban	5.39393
G5265	59.35	26.27	Europe	Estonia	Karivarava				anthropogenic	village	5.9665
G5266	59.35	26.11	Europe	Estonia	Undla				anthropogenic	village	5.81621
G5267	59.43	24.86	Europe	Estonia	Tallinn	Kuuli			anthropogenic	urban	5.32239
G5268	58.78	25.43	Europe	Estonia	Sarevere				forest	temperate broadleaf forest	5.43563
G5269	58.87	24.53	Europe	Estonia	Kasti				anthropogenic	village	5.39755
G5270	58.91	24.9	Europe	Estonia	Nadalama				forest	temperate broadleaf forest	5.25606
G5271	58.91	24.9	Europe	Estonia	Nadalama				forest	temperate broadleaf forest	5.76253
G5272	58.28	27.29	Europe	Estonia	Agali arboretum				forest	temperate coniferous forest	5.112
G5273	58.28	27.29	Europe	Estonia	Agali arboretum				forest	temperate broadleaf forest	5.72045
G5274	58.28	27.29	Europe	Estonia	Agali arboretum				forest	temperate coniferous forest	6.25111
G5275	58.28	27.28	Europe	Estonia	Agali arboretum				forest	temperate coniferous forest	5.24774
G5276	58.28	27.28	Europe	Estonia	Agali arboretum				forest	temperate coniferous forest	5.88568
G5277	58.28	27.28	Europe	Estonia	Agali arboretum				forest	temperate broadleaf forest	6.02962
G5278	58.28	27.28	Europe	Estonia	Agali arboretum				forest	temperate broadleaf forest	5.40357
G5279	58.28	27.28	Europe	Estonia	Agali arboretum				forest	temperate coniferous forest	5.49644
G5280	58.28	27.29	Europe	Estonia	Agali arboretum				forest	temperate coniferous forest	5.67803
G5281	58.28	27.29	Europe	Estonia	Agali arboretum				forest	temperate broadleaf forest	5.39623
G5282	58.28	27.05	Europe	Estonia	V0nnu				anthropogenic	village	5.56728
G5283	58.38	26.59	Europe	Estonia	Rahinge				forest	temperate broadleaf forest	5.47556
G5284	58.38	26.68	Europe	Estonia	Tartu				anthropogenic	urban	5.92699
G5285	57.55	25.44	Europe	Latvia	Valmiera				anthropogenic	urban	5.43059
G5286	57.26	24.88	Europe	Latvia	Inciems				anthropogenic	village	5.36915
G5287	57.04	24.4	Europe	Latvia	Garkalne				anthropogenic	village	4.92962
G5288	56.87	24.36	Europe	Latvia	Salaspils				anthropogenic	urban	5.32568
G5289	56.87	24.36	Europe	Latvia	Salaspils				anthropogenic	urban	5.49604
G5290	56.87	24.35	Europe	Latvia	Salaspils				anthropogenic	urban	5.32766
G5291	56.87	24.35	Europe	Latvia	Salaspils				anthropogenic	urban	4.85336
G5292	56.87	24.35	Europe	Latvia	Salaspils				anthropogenic	urban	5.90756
G5293	56.87	24.36	Europe	Latvia	Salaspils				anthropogenic	urban	5.18997
G5294	58.37	26.75	Europe	Estonia	Tartu				anthropogenic	urban	5.11873
G5295	58.36	26.64	Europe	Estonia	Marja				anthropogenic	village	4.40695
HB1	58.28	26.66	Europe	Estonia	Lati				forest	temperate broadleaf forest	5.54689
HB10	58.5	26.84	Europe	Estonia	Soekula				forest	temperate broadleaf forest	5.68761
HB11	58.19	26.3	Europe	Estonia	Teedla				forest	temperate broadleaf forest	5.27414
HB12	57.87	26.1	Europe	Estonia	Sooru				forest	temperate broadleaf forest	5.20203
HB13	57.87	27.25	Europe	Estonia	Pikakannu				forest	temperate broadleaf forest	5.42966
HB14	58.23	27.31	Europe	Estonia	Sikakurmu				forest	temperate broadleaf forest	5.45661
HB15	57.91	26.1	Europe	Estonia	T0lliste				forest	temperate broadleaf forest	5.30988
HB16	58.23	26.96	Europe	Estonia	Lootvina				forest	temperate broadleaf forest	5.61598
HB17	57.56	26.66	Europe	Estonia	Vastse-Roosa				forest	temperate broadleaf forest	5.62211
HB18	58.73	25.35	Europe	Estonia	Muruoja				forest	temperate broadleaf forest	5.58973
HB19	58.83	26.38	Europe	Estonia	Rohe				forest	temperate broadleaf forest	5.50206
HB2	57.77	26.27	Europe	Estonia	Pikkjarve				forest	temperate broadleaf forest	5.29198
HB20	58.7	26.33	Europe	Estonia	Siimusti				forest	temperate broadleaf forest	5.15201
HB21	58.27	27.29	Europe	Estonia	Jarvselja				forest	temperate broadleaf forest	4.98921
HB22	58.27	27.31	Europe	Estonia	Jarvselja				forest	temperate broadleaf forest	5.28076
HB23	58.28	27.31	Europe	Estonia	Jarvselja				forest	temperate broadleaf forest	4.76194
HB24	58.28	27.33	Europe	Estonia	Jarvselja				forest	temperate broadleaf forest	5.44187
HB25	58.25	27.28	Europe	Estonia	Jarvselja				forest	temperate broadleaf forest	5.36739
HB26	58.26	27.27	Europe	Estonia	Jarvselja				forest	temperate broadleaf forest	5.30737
HB27	58.28	27.32	Europe	Estonia	Jarvselja				forest	temperate broadleaf forest	5.63998
HB28	58.29	27.27	Europe	Estonia	Jarvselja				forest	temperate broadleaf forest	5.53629
HB29	58.25	27.27	Europe	Estonia	Jarvselja				forest	temperate broadleaf forest	5.36219
HB3	57.97	26.49	Europe	Estonia	Kaurutootsi				forest	temperate broadleaf forest	5.61093
HB30	58.26	27.29	Europe	Estonia	Jarvselja				forest	temperate broadleaf forest	4.94587
HB31	58.26	27.29	Europe	Estonia	Jarvselja				forest	temperate broadleaf forest	5.37395
HB32	58.3	27.3	Europe	Estonia	Jarvselja				forest	temperate broadleaf forest	5.4777
HB33	58.27	27.33	Europe	Estonia	Jarvselja				forest	temperate broadleaf forest	5.04112
HB34	58.25	27.29	Europe	Estonia	Jarvselja				forest	temperate broadleaf forest	4.94118
HB35	58.27	27.29	Europe	Estonia	Jarvselja				forest	temperate broadleaf forest	5.0499
HB36	58.28	27.33	Europe	Estonia	Jarvselja				forest	temperate broadleaf forest	4.93997
HB37	58.26	27.28	Europe	Estonia	Jarvselja				forest	temperate broadleaf forest	4.71915
HB38	58.28	27.33	Europe	Estonia	Jarvselja				forest	temperate broadleaf forest	5.39951
HB39	58.27	27.32	Europe	Estonia	Jarvselja				forest	temperate broadleaf forest	5.42039
HB4	58.33	26.56	Europe	Estonia	N0giaru				forest	temperate broadleaf forest	4.67332
HB40	58.26	27.3	Europe	Estonia	Jarvselja				forest	temperate broadleaf forest	5.43323
HB5	58.18	27.41	Europe	Estonia	Naha				forest	temperate broadleaf forest	5.21679
HB6	58.12	27.21	Europe	Estonia	Kaaru				forest	temperate broadleaf forest	4.98575
HB7	58.5	26.91	Europe	Estonia	Vara				forest	temperate broadleaf forest	5.44616
HB8	58.59	25.25	Europe	Estonia	Kootsi				forest	temperate broadleaf forest	5.23454
HB9	57.75	26.26	Europe	Estonia	Karula				forest	temperate broadleaf forest	5.41115
IH.A01	59.07	27.53	Europe	Estonia	Agusalu				forest	temperate coniferous forest	3.49702
IH.A02	59.1	27.44	Europe	Estonia	Agusalu				forest	temperate coniferous forest	3.8555
IH.A03	59.07	27.48	Europe	Estonia	Agusalu				forest	temperate coniferous forest	4.37515
IH.A12	59.08	27.49	Europe	Estonia	Agusalu				forest	temperate coniferous forest	5.04214
IH.A14	59.06	27.51	Europe	Estonia	Agusalu				forest	temperate coniferous forest	5.09557
IH.A20	59.1	27.42	Europe	Estonia	Agusalu				forest	temperate coniferous forest	4.9286
IH.A21	59.1	27.41	Europe	Estonia	Agusalu				forest	temperate coniferous forest	5.33939
IH.A31	59.1	27.44	Europe	Estonia	Agusalu				forest	temperate coniferous forest	4.69024
IH.A36	59.08	27.46	Europe	Estonia	Agusalu				forest	temperate coniferous forest	4.74496
IH.A39	59.06	27.52	Europe	Estonia	Agusalu				forest	temperate coniferous forest	4.36565
IH.A51	59.08	27.46	Europe	Estonia	Agusalu				forest	temperate coniferous forest	4.9268
IH.A56	59.06	27.51	Europe	Estonia	Agusalu				forest	temperate coniferous forest	4.32668
IH.A61	59.06	27.5	Europe	Estonia	Agusalu				forest	temperate coniferous forest	5.22363
IH.A72	59.06	27.51	Europe	Estonia	Agusalu				forest	temperate coniferous forest	5.01013
IH.A78	59.08	27.48	Europe	Estonia	Agusalu				forest	temperate coniferous forest	4.96252
IH.A89	59.1	27.43	Europe	Estonia	Agusalu				forest	temperate coniferous forest	4.49936
IH.A90	59.06	27.5	Europe	Estonia	Agusalu				forest	temperate coniferous forest	5.21365
IH.A93	59.07	27.44	Europe	Estonia	Agusalu				forest	temperate coniferous forest	4.5152
IH.K01	57.68	26.6	Europe	Estonia	Karula				forest	temperate coniferous forest	4.49648
IH.K02	57.67	26.57	Europe	Estonia	Karula				forest	temperate coniferous forest	4.57519
IH.K05	57.68	26.6	Europe	Estonia	Karula				forest	temperate coniferous forest	4.10933
IH.K07	57.67	26.6	Europe	Estonia	Karula				forest	temperate coniferous forest	4.44191
IH.K10	57.68	26.55	Europe	Estonia	Karula				forest	temperate coniferous forest	4.88044
IH.K13	57.66	26.45	Europe	Estonia	Karula				forest	temperate coniferous forest	4.42867
IH.K16	57.67	26.47	Europe	Estonia	Karula				forest	temperate coniferous forest	4.97448
IH.K17	57.65	26.41	Europe	Estonia	Karula				forest	temperate coniferous forest	4.75011
IH.K19	57.64	26.41	Europe	Estonia	Karula				forest	temperate coniferous forest	3.08398
IH.K21	57.65	26.5	Europe	Estonia	Karula				forest	temperate coniferous forest	4.75861
IH.K22	57.65	26.5	Europe	Estonia	Karula				forest	temperate coniferous forest	4.29667
IH.K23	57.67	26.47	Europe	Estonia	Karula				forest	temperate coniferous forest	2.77322
IH.K24	57.67	26.47	Europe	Estonia	Karula				forest	temperate coniferous forest	4.4046
IH.K29	57.69	26.48	Europe	Estonia	Karula				forest	temperate coniferous forest	3.98273
IH.K35	57.67	26.56	Europe	Estonia	Karula				forest	temperate coniferous forest	4.42707
IH.K37	57.67	26.51	Europe	Estonia	Karula				forest	temperate coniferous forest	4.06625
IH.K38	57.66	26.52	Europe	Estonia	Karula				forest	temperate coniferous forest	3.50228
IH.K39	57.67	26.47	Europe	Estonia	Karula				forest	temperate coniferous forest	3.29786
IH.M01	57.95	27.34	Europe	Estonia	Meenikunno				forest	temperate coniferous forest	4.06565
IH.M07	57.92	27.33	Europe	Estonia	Meenikunno				forest	temperate coniferous forest	5.37509
IH.M09	57.94	27.35	Europe	Estonia	Meenikunno				forest	temperate coniferous forest	4.74723
IH.M10	57.94	27.35	Europe	Estonia	Meenikunno				forest	temperate coniferous forest	5.77437
IH.M13	57.94	27.4	Europe	Estonia	Meenikunno				forest	temperate coniferous forest	4.62194
IH.M14	57.92	27.38	Europe	Estonia	Meenikunno				forest	temperate coniferous forest	4.71258
IH.M16	57.93	27.41	Europe	Estonia	Meenikunno				forest	temperate coniferous forest	5.17222
IH.M23	57.96	27.28	Europe	Estonia	Meenikunno				forest	temperate coniferous forest	5.49034
IH.M27	57.94	27.3	Europe	Estonia	Meenikunno				forest	temperate coniferous forest	4.98572
IH.M30	57.96	27.32	Europe	Estonia	Meenikunno				forest	temperate coniferous forest	4.80513
IH.M33	57.95	27.37	Europe	Estonia	Meenikunno				forest	temperate coniferous forest	5.11584
IH.M37	57.94	27.29	Europe	Estonia	Meenikunno				forest	temperate coniferous forest	5.08694
IH.M41	57.94	27.36	Europe	Estonia	Meenikunno				forest	temperate coniferous forest	4.89752
IH.M42	57.93	27.35	Europe	Estonia	Meenikunno				forest	temperate coniferous forest	4.53776
IH.M45	57.96	27.29	Europe	Estonia	Meenikunno				forest	temperate coniferous forest	4.8072
IH.M46	57.94	27.35	Europe	Estonia	Meenikunno				forest	temperate coniferous forest	4.68702
IH.M47	57.94	27.35	Europe	Estonia	Meenikunno				forest	temperate coniferous forest	4.81391
IH.M48	57.92	27.29	Europe	Estonia	Meenikunno				forest	temperate coniferous forest	4.42353
IHPR01	67.58	18.1	Europe	Sweden	Stora Sjofallet				tundra	tundra	5.89006
IHPR02	67.64	17.82	Europe	Sweden	Stora Sjofallet				tundra	tundra	5.13052
IHPR03	67.77	17.33	Europe	Sweden	Stora Sjofallet				tundra	tundra	5.41797
IHPR04	67.75	17.38	Europe	Sweden	Stora Sjofallet				tundra	tundra	5.25067
IHPR05	67.73	17.42	Europe	Sweden	Stora Sjofallet				tundra	tundra	5.33213
IHPR06	67.73	17.45	Europe	Sweden	Stora Sjofallet				tundra	tundra	5.8395
IHPR07	67.69	17.72	Europe	Sweden	Stora Sjofallet				tundra	tundra	4.88625
IHPR08	67.69	17.7	Europe	Sweden	Stora Sjofallet				tundra	tundra	5.64401
IHPR09	67.69	17.67	Europe	Sweden	Stora Sjofallet				tundra	tundra	5.43058
IHPR10	67.69	17.64	Europe	Sweden	Stora Sjofallet				tundra	tundra	5.2686
IHPR11	67.69	17.63	Europe	Sweden	Stora Sjofallet				tundra	tundra	5.80942
IHPR12	67.68	17.6	Europe	Sweden	Stora Sjofallet				tundra	tundra	5.04954
IHPR13	67.64	17.79	Europe	Sweden	Stora Sjofallet				forest	subpolar coniferous forest	4.12019
IHPR14	67.59	17.5	Europe	Sweden	Stora Sjofallet				tundra	tundra	5.64723
IHPR15	67.6	17.49	Europe	Sweden	Stora Sjofallet				tundra	tundra	4.3796
IHPR16	67.6	17.46	Europe	Sweden	Stora Sjofallet				tundra	tundra	4.83058
IHPR17	67.61	17.45	Europe	Sweden	Stora Sjofallet				tundra	tundra	5.55294
IHPR18	67.61	17.43	Europe	Sweden	Stora Sjofallet				tundra	tundra	5.56858
IHPR19	67.62	17.37	Europe	Sweden	Stora Sjofallet				tundra	tundra	5.13324
IHPR20	67.88	18.83	Europe	Sweden	Nikkaluokta				tundra	tundra	4.96848
IHPR21	67.88	18.85	Europe	Sweden	Nikkaluokta				tundra	tundra	5.01675
IHPR22	67.87	18.88	Europe	Sweden	Nikkaluokta				tundra	tundra	5.25018
IHPR23	67.87	18.91	Europe	Sweden	Nikkaluokta				tundra	tundra	5.39012
IHPR24	67.86	18.93	Europe	Sweden	Nikkaluokta				tundra	tundra	5.1642
IHPR25	68.35	18.96	Europe	Sweden	Abisko				tundra	tundra	5.87363
IHPR26	68.45	18.6	Europe	Sweden	Abisko				tundra	tundra	5.61943
IHPR27	68.36	18.68	Europe	Sweden	Abisko				tundra	tundra	5.23244
IHPR28	68.35	18.7	Europe	Sweden	Abisko				tundra	tundra	4.96489
IHPR29	68.36	18.73	Europe	Sweden	Abisko				tundra	tundra	5.69516
IHPR30	68.36	18.74	Europe	Sweden	Abisko				tundra	tundra	5.54916
IHPR31	68.4	18.36	Europe	Sweden	Abisko				tundra	tundra	4.56704
IHPR32	68.38	18.38	Europe	Sweden	Abisko				tundra	tundra	4.60009
IHPR33	68.39	18.45	Europe	Sweden	Abisko				tundra	tundra	5.44914
IHPR34	68.41	18.46	Europe	Sweden	Abisko				tundra	tundra	4.80284
IHPR35	68.41	18.43	Europe	Sweden	Abisko				tundra	tundra	5.52321
IHPR36	68.42	18.38	Europe	Sweden	Abisko				tundra	tundra	4.86822
IHPR37	68.42	18.41	Europe	Sweden	Abisko				tundra	tundra	5.88775
IHPR38	68.16	17.59	Europe	Norway	Narvik				forest	subpolar coniferous forest	4.76015
IHPR39	68.16	17.68	Europe	Norway	Narvik				tundra	tundra	5.70769
S1000	48.81	14.31	Europe	Czech Republic	Cesky Krumlov				forest	temperate broadleaf forest	5.56509
S1001	48.94	14.78	Europe	Czech Republic	Nové Hrady				forest	temperate broadleaf forest	5.54223
S1002	48.79	14.78	Europe	Czech Republic	Nové Hrady				forest	temperate broadleaf forest	5.72175
S1003	49.98	16.99	Europe	Czech Republic	Velké Losiny				forest	temperate broadleaf forest	5.55655
S1004	50.02	17.03	Europe	Czech Republic	Velké Losiny				forest	temperate broadleaf forest	5.65308
S1005	NA	NA	Europe	Czech Republic					unknown	unknown	5.87499
S1006	49.71	17.02	Europe	Czech Republic	Bílá Lhota				forest	temperate broadleaf forest	4.99149
S1007	49.71	16.99	Europe	Czech Republic	Bílá Lhota				forest	temperate broadleaf forest	5.9443
S1008	49.53	17.5	Europe	Czech Republic	Veselícko				forest	temperate broadleaf forest	5.57167
S1009	49.53	17.51	Europe	Czech Republic	Veselícko				forest	temperate broadleaf forest	5.99049
S1010	49.72	18.27	Europe	Czech Republic	Paskov				forest	temperate broadleaf forest	5.29922
S1011	49.73	18.3	Europe	Czech Republic	Paskov				forest	temperate broadleaf forest	5.63269
S1012	49.97	17.79	Europe	Czech Republic	Velké Heraltice				forest	temperate broadleaf forest	6.06705
S1013	49.97	17.74	Europe	Czech Republic	Velké Heraltice				forest	temperate broadleaf forest	6.05456
S1014	49.31	17.39	Europe	Czech Republic	Kromeríz				forest	temperate broadleaf forest	5.90239
S1015	49.21	17.42	Europe	Czech Republic	Kromeríz				forest	temperate broadleaf forest	5.5366
S1016	49.03	17.8	Europe	Czech Republic	Novy Svetlov				forest	temperate broadleaf forest	4.96231
S1017	49.03	17.79	Europe	Czech Republic	Novy Svetlov				forest	temperate broadleaf forest	5.4148
S1018	48.81	16.81	Europe	Czech Republic	Lednice				forest	temperate broadleaf forest	6.14155
S1019	48.81	16.84	Europe	Czech Republic	Lednice				forest	temperate broadleaf forest	6.11692
S1020	50.14	8.27	Europe	Germany	Taunus				forest	temperate broadleaf forest	4.78482
S1037	50.01	12.61	Europe	Czech Republic	Kynzvart				forest	temperate broadleaf forest	5.11036
S1038	49.99	12.63	Europe	Czech Republic	Kynzvart				forest	temperate broadleaf forest	5.21534
S1039	49.86	13.76	Europe	Czech Republic	Zbiroh				forest	temperate broadleaf forest	5.12181
S1040	49.83	13.8	Europe	Czech Republic	Zbiroh				forest	temperate broadleaf forest	5.0271
S1041	50.2	14.84	Europe	Czech Republic	Lysá nad Labem				forest	temperate broadleaf forest	4.40054
S1042	50.19	14.86	Europe	Czech Republic	Lysá nad Labem				forest	temperate broadleaf forest	5.48097
S1043	50.14	14.58	Europe	Czech Republic	Vinor				forest	temperate broadleaf forest	5.08501
S1044	50.13	14.58	Europe	Czech Republic	Vinor				forest	temperate broadleaf forest	5.41281
S1045	49.05	14.44	Europe	Czech Republic	Hluboká nad Vltavou				forest	temperate broadleaf forest	5.76385
S1046	49.05	14.51	Europe	Czech Republic	Hluboká nad Vltavou				forest	temperate broadleaf forest	5.38954
S1047	50.4	14.05	Europe	Czech Republic	Libochovice				forest	temperate broadleaf forest	4.60114
S1048	50.41	14.12	Europe	Czech Republic	Libochovice				forest	temperate broadleaf forest	4.19832
S1049	50.45	14.16	Europe	Czech Republic	Doksany				forest	temperate broadleaf forest	5.27652
S1050	50.44	14.16	Europe	Czech Republic	Doksany				forest	temperate broadleaf forest	4.89253
S1051	49.74	14.79	Europe	Czech Republic	Jemniste				forest	temperate broadleaf forest	5.44133
S1052	49.71	14.89	Europe	Czech Republic	Vlasim				forest	temperate broadleaf forest	5.10076
S1053	49.72	14.83	Europe	Czech Republic	Vlasim				forest	temperate broadleaf forest	4.69554
S1079	37.59	-1.08	Europe	Spain	Cartagena				forest	mediterranean forest	5.19685
S1080	38.3	-0.72	Europe	Spain	Elche				shrubland	subtropical shrubland	5.68539
S1092	52.71	23.82	Europe	Poland	Pogorzelce				forest	temperate broadleaf forest	5.31387
S112	56.08	-4.56	Europe	Scotland	Inchcailloch				forest	temperate broadleaf forest	4.74178
S1129	39.27	8.81	Europe	Italy	Siliqua				forest	mediterranean forest	5.19301
S113	53.12	-2.21	Europe	England	Wrekin	Limekiln Woods			forest	temperate broadleaf forest	4.98668
S1130	39.46	8.86	Europe	Italy	Serramanna				forest	mediterranean forest	5.07045
S1131	39.41	8.71	Europe	Italy	Villacidro				forest	mediterranean forest	5.42027
S1132	39.8	8.63	Europe	Italy	Arborea				forest	mediterranean forest	5.53294
S1133	39.84	8.66	Europe	Italy	Santa Giusta				forest	mediterranean forest	5.17491
S1134	39.78	9.61	Europe	Italy	Cardedu				forest	mediterranean forest	4.8158
S1135	39.64	9.58	Europe	Italy	Tertenia				forest	mediterranean forest	4.90846
S1136	39.74	9.57	Europe	Italy	Jerzu				forest	mediterranean forest	5.30467
S1137	39.26	9.53	Europe	Italy	Castiadas				forest	mediterranean forest	5.07607
S1138	39.23	9.49	Europe	Italy	Castiadas				forest	mediterranean forest	5.27437
S1139	40.61	8.22	Europe	Italy	Alghero				forest	mediterranean forest	5.48132
S114	49.02	13.48	Europe	Czech Republic	Sumava NP				forest	temperate coniferous forest	5.34288
S1140	40.61	8.22	Europe	Italy	Alghero				forest	mediterranean forest	5.21137
S1141	40.54	9.67	Europe	Italy	Siniscola				forest	mediterranean forest	5.33597
S1142	40.65	9.71	Europe	Italy	Posada				forest	mediterranean forest	5.11057
S1143	40.7	9.72	Europe	Italy	Budoni				forest	mediterranean forest	5.17832
S1144	40.7	9.73	Europe	Italy	Budoni				forest	mediterranean forest	5.38944
S115	49.12	13.24	Europe	Czech Republic	Sumava NP				forest	temperate broadleaf forest	4.53858
S1155	50	11.85	Europe	Germany	Fichtelberg				forest	temperate broadleaf forest	5.35685
S1156	44.39	10.1	Europe	Italy	Valditacca				forest	temperate broadleaf forest	5.37054
S1157	53.18	13.82	Europe	Germany	Schorfheide-Chorin				forest	temperate broadleaf forest	5.36993
S1158	46.37	11.35	Europe	Italy	Aldino				forest	temperate broadleaf forest	4.48383
S1159	55.04	12.26	Europe	Denmark	Møn				forest	temperate broadleaf forest	5.29548
S116	57.01	-2.85	Europe	Scotland	Glen Tanar				forest	temperate coniferous forest	4.84291
S1160	51.58	10.09	Europe	Germany	Göttingen				forest	temperate coniferous forest	4.86665
S1161	42.08	12.09	Europe	Italy	Manziano				forest	mediterranean forest	4.46854
S1162	65.25	21.59	Europe	Sweden	Piteå				forest	subpolar coniferous forest	4.69873
S1163	48.41	11.7	Europe	Germany	Freising				forest	temperate coniferous forest	4.9094
S1164	42.11	12.1	Europe	Italy	Manziano				forest	mediterranean forest	3.14776
S1165	43.08	11.2	Europe	Italy	Belagaio				forest	mediterranean forest	5.51312
S1166	53.18	13.82	Europe	Germany	Schorfheide-Chorin				forest	temperate broadleaf forest	5.55438
S1167	56.01	12.09	Europe	Denmark	Auderød				forest	temperate broadleaf forest	5.23156
S1168	50.01	11.87	Europe	Germany	Göttingen				forest	temperate coniferous forest	5.44108
S1169	50	11.85	Europe	Germany	Fichtelberg				forest	temperate coniferous forest	2.92552
S117	57.21	-3.62	Europe	Scotland	Abernethy forest				forest	temperate coniferous forest	4.92775
S1170	57.15	14.77	Europe	Sweden	Asa				forest	temperate coniferous forest	5.7718
S1171	59.83	17.62	Europe	Sweden	Uppsala				forest	temperate coniferous forest	5.56105
S1172	62.46	17.48	Europe	Sweden	Sundsvall				forest	temperate broadleaf forest	5.60616
S1173	66.61	26.02	Europe	Finland	Rovaniemi				forest	temperate broadleaf forest	5.43593
S1174	64.24	19.77	Europe	Sweden	Vindeln				forest	subpolar coniferous forest	5.12943
S1175	60.89	14.38	Europe	Sweden	Siljanfors				forest	subpolar coniferous forest	5.84429
S1176	53.2	13.87	Europe	Germany	Schorfheide-Chorin				forest	temperate coniferous forest	4.62766
S1177	64.25	19.77	Europe	Sweden	Vindeln				forest	subpolar coniferous forest	1.86121
S1178	53.17	13.84	Europe	Germany	Schorfheide-Chorin				forest	temperate coniferous forest	5.38535
S1179	51.43	10.02	Europe	Germany	Göttingen				forest	temperate broadleaf forest	5.66025
S118	57.26	-4.98	Europe	Scotland	Glen Affric				forest	temperate coniferous forest	4.46647
S1180	69.46	30.04	Europe	Norway	Svanhovd				forest	subpolar coniferous forest	5.64761
S1181	51.46	9.99	Europe	Germany	Göttingen				forest	temperate broadleaf forest	5.63001
S1182	48.41	11.69	Europe	Germany	Freising				forest	temperate broadleaf forest	4.72275
S1183	46.41	11.5	Europe	Italy	Aldino				forest	temperate coniferous forest	5.0008
S1184	46.37	11.36	Europe	Italy	Aldino				forest	temperate coniferous forest	4.67632
S119	56.68	-4.33	Europe	Scotland	Black wood of Rannoch				forest	temperate coniferous forest	5.0181
S120	57.01	-3.47	Europe	Scotland	Braemar				forest	temperate coniferous forest	5.44566
S121	50.14	8.27	Europe	Germany	Taunus				forest	temperate broadleaf forest	4.7425
S121z	50.14	8.27	Europe	Germany	Taunus				forest	temperate broadleaf forest	4.5466
S122	37.91	14.66	Europe	Italy	Messina	Portella dell'Obolo			forest	temperate broadleaf forest	5.91472
S1222	38.02	13.19	Europe	Italy	Sicily	Punte di Cuti			forest	mediterranean forest	5.4184
S1223	38.02	13.19	Europe	Italy	Sicily	Punte di Cuti			forest	mediterranean forest	6.19059
S123	37.9	14.5	Europe	Italy	Messina	Portella dell'Obolo			forest	temperate broadleaf forest	5.97845
S123Z	37.9	14.5	Europe	Italy	Messina	Portella dell'Obolo			forest	temperate broadleaf forest	5.71261
S124	37.87	14.02	Europe	Italy	Palermo	Monte Mufara			forest	temperate broadleaf forest	5.56114
S124Z	37.87	14.02	Europe	Italy	Palermo	Monte Mufara			forest	temperate broadleaf forest	5.35528
S125	37.86	14.04	Europe	Italy	Palermo	Monte Daino			forest	temperate broadleaf forest	5.5822
S125Z	37.86	14.04	Europe	Italy	Palermo	Monte Daino			forest	temperate broadleaf forest	5.88935
S126	37.86	14.07	Europe	Italy	Palermo	Vallone San Nicola			forest	temperate broadleaf forest	5.79702
S126Z	37.86	14.07	Europe	Italy	Palermo	Vallone San Nicola			forest	temperate broadleaf forest	5.24067
S127	37.97	13.94	Europe	Italy	Palermo	Madonna Lume			forest	temperate broadleaf forest	4.61038
S128	38.02	14.04	Europe	Italy	Palermo	Contrada Mazzatore			shrubland	temperate shrubland	5.7116
S129	37.9	14	Europe	Italy	Palermo	Piano Zucchi			forest	temperate broadleaf forest	6.15744
S1292	59.44	8.55	Europe	Norway	Vigdesja				forest	temperate coniferous forest	3.60084
S1293	59.82	8.32	Europe	Norway	Skinnarbu				forest	temperate broadleaf forest	5.2363
S1294	60.64	5.21	Europe	Norway	Seim				forest	temperate broadleaf forest	4.58167
S1295	60.92	5.49	Europe	Norway	Hogsvaer				grassland	temperate grassland	3.59264
S1296	61.32	5.78	Europe	Norway	Sande				forest	subpolar coniferous forest	4.96731
S1297	61.64	6.52	Europe	Norway	Klakegg				grassland	temperate grassland	2.11126
S1298	61.87	6.8	Europe	Norway	Loen				forest	temperate broadleaf forest	4.59691
S1299	61.93	7.24	Europe	Norway	Folva				forest	temperate broadleaf forest	5.1391
S129z	37.9	14	Europe	Italy	Palermo	Piano Zucchi			forest	temperate broadleaf forest	5.58678
S130	37.99	14.21	Europe	Italy	Messina	Contrada Altopiano			forest	temperate broadleaf forest	5.53435
S1300	62.03	7.32	Europe	Norway	Djupevatn				tundra	tundra	4.55914
S1301	62.37	9.64	Europe	Norway	Nedstavoll				forest	temperate broadleaf forest	5.24908
S1302	61.73	10.9	Europe	Norway	Atna				forest	subpolar coniferous forest	3.82414
S1303	60.27	11.1	Europe	Norway	Sundby				grassland	temperate grassland	4.59437
S1304	61.83	23.35	Europe	Finland	Laurilanpera				grassland	temperate grassland	4.80827
S1305	61.83	23.35	Europe	Finland	Laurilanpera				forest	temperate broadleaf forest	4.93323
S1306	63.4	23.86	Europe	Finland	Salmela				forest	subpolar coniferous forest	5.00341
S1307	63.4	23.9	Europe	Finland	Viiste				grassland	temperate grassland	5.22635
S1308	65.08	25.44	Europe	Finland	Ritaharju				forest	subpolar coniferous forest	4.28463
S1309	65.14	25.43	Europe	Finland	Penttilanpera				grassland	temperate grassland	4.99727
S1310	65.96	25.16	Europe	Finland	Kumpula				grassland	temperate grassland	4.19857
S1311	66.35	25.44	Europe	Finland	Koskenranta				forest	subpolar coniferous forest	4.50682
S1312	66.66	25.36	Europe	Finland	Rintala				grassland	temperate grassland	3.4147
S1313	68.06	24.03	Europe	Finland	Pallastunturi				tundra	tundra	5.31185
S1314	68.17	24.15	Europe	Finland	Yli-Kyrö				forest	subpolar coniferous forest	4.91048
S1315	68.44	24.06	Europe	Finland	Vuotinsjarvi				grassland	temperate grassland	4.77103
S1316	68.54	23.33	Europe	Finland	Kortejarvi				forest	temperate broadleaf forest	4.61165
S1317	69.97	23.36	Europe	Norway	Alta				forest	subpolar coniferous forest	4.37073
S1318	69.89	21.57	Europe	Norway	Kvaenangsfjellet				tundra	tundra	5.14854
S1319	70.01	22.04	Europe	Norway	Alteidet				grassland	temperate grassland	4.41957
S1320	70.02	22.06	Europe	Norway	Alteidet				forest	temperate broadleaf forest	4.6951
S1321	70.11	23.47	Europe	Norway	Krokelv				forest	subpolar coniferous forest	5.02846
S1322	70.12	23.38	Europe	Norway	Krokelv				tundra	tundra	4.68482
S1323	70.11	23.42	Europe	Norway	Krokelv				grassland	temperate grassland	4.1356
S1324	54.89	24.08	Europe	Lithuania	Ziegzdriai				forest	temperate broadleaf forest	5.33328
S1325	54.88	24.12	Europe	Lithuania	Ziegzdriai				grassland	temperate grassland	5.93844
S1326	54.89	24.08	Europe	Lithuania	Ziegzdriai				forest	temperate coniferous forest	5.363
S1327	54.81	24.1	Europe	Lithuania	Dubrava				forest	temperate coniferous forest	4.66139
S1328	54.86	24.05	Europe	Lithuania	Dubrava				forest	temperate broadleaf forest	5.61522
S1329	54.85	24.04	Europe	Lithuania	Dubrava				grassland	temperate grassland	5.47848
S1330	54.81	24.1	Europe	Lithuania	Dubrava				forest	temperate coniferous forest	4.33196
S1331	54.89	24.08	Europe	Lithuania	Ziegzdriai				forest	temperate coniferous forest	5.17321
S1332	54.21	24.39	Europe	Lithuania	Perloja				forest	temperate broadleaf forest	5.16287
S1333	54.21	24.39	Europe	Lithuania	Perloja				forest	temperate coniferous forest	5.15416
S1334	54.21	24.38	Europe	Lithuania	Perloja				grassland	temperate grassland	4.89417
S1335	54.21	24.39	Europe	Lithuania	Perloja				forest	temperate coniferous forest	4.56285
S1336	54.87	23.7	Europe	Lithuania	Kacergine				forest	temperate coniferous forest	4.21853
S1337	54.88	23.69	Europe	Lithuania	Kacergine				forest	temperate broadleaf forest	4.02075
S1338	54.87	23.75	Europe	Lithuania	Kacergine				grassland	temperate grassland	5.65154
S1339	54.87	23.7	Europe	Lithuania	Kacergine				forest	temperate coniferous forest	4.86124
S1340	54.78	23.58	Europe	Lithuania	Kazlu Ruda				forest	temperate coniferous forest	4.76284
S1341	54.78	23.6	Europe	Lithuania	Kazlu Ruda				forest	temperate broadleaf forest	5.12606
S1342	54.74	23.62	Europe	Lithuania	Kazlu Ruda				grassland	temperate grassland	5.80844
S1343	54.78	23.58	Europe	Lithuania	Kazlu Ruda				forest	temperate coniferous forest	4.42167
S1346	69.69	18.97	Europe	Norway	Tromso				forest	temperate broadleaf forest	5.56542
S1347	69.69	18.97	Europe	Norway	Tromso				forest	temperate broadleaf forest	5.24622
S1348	69.65	18.9	Europe	Norway	Tromso				grassland	temperate grassland	4.64087
S1349	69.68	18.96	Europe	Norway	Tromso				forest	subpolar coniferous forest	4.93607
S1350	69.09	18.21	Europe	Norway	Nordstraumen				forest	temperate broadleaf forest	5.55749
S1351	69.11	18.21	Europe	Norway	Nordstraumen				grassland	temperate grassland	5.06958
S1352	69.09	18.26	Europe	Norway	Aisajavri				forest	subpolar coniferous forest	5.6886
S1353	66.66	15.43	Europe	Norway	Lonsdal				forest	temperate broadleaf forest	5.81053
S1354	66.65	15.46	Europe	Norway	Lonsdal				tundra	tundra	5.51925
S1355	66.73	15.47	Europe	Norway	Lonsdal				forest	subpolar coniferous forest	4.50515
S1356	68.54	17.27	Europe	Norway	Lenvikmarka				forest	temperate broadleaf forest	5.43117
S1357	68.52	17.12	Europe	Norway	Lenvikmarka				grassland	temperate grassland	4.62509
S1358	68.54	17.22	Europe	Norway	Lenvikmarka				forest	subpolar coniferous forest	5.39668
S1359	66.82	15.39	Europe	Norway	Storjord				forest	temperate broadleaf forest	5.17855
S1360	66.82	15.39	Europe	Norway	Storjord				grassland	temperate grassland	5.5609
S1361	66.82	15.38	Europe	Norway	Storjord				forest	subpolar coniferous forest	5.15356
S1362	68.28	13.85	Europe	Norway	Vestersand				forest	temperate broadleaf forest	4.77119
S1363	68.26	13.82	Europe	Norway	Bostad				grassland	temperate grassland	4.32447
S1364	68.26	13.83	Europe	Norway	Bostad				forest	subpolar coniferous forest	4.98101
S1365	67.97	15.98	Europe	Norway	Innhavet				forest	temperate broadleaf forest	5.74601
S1366	67.97	15.93	Europe	Norway	Innhavet				grassland	temperate grassland	6.06379
S1367	67.96	15.94	Europe	Norway	Innhavet				forest	subpolar coniferous forest	5.19512
S1368	68.24	14.66	Europe	Norway	Svolvaer airfield				forest	temperate broadleaf forest	4.66067
S1369	68.24	14.66	Europe	Norway	Svolvaer airfield				grassland	temperate grassland	5.50012
S1370	68.24	14.54	Europe	Norway	Svolvaer				forest	subpolar coniferous forest	4.80387
S1371	68.3	16.51	Europe	Norway	Forsa				forest	temperate broadleaf forest	5.3729
S1372	68.3	16.51	Europe	Norway	Forsa				grassland	temperate grassland	5.1775
S1373	68.29	16.51	Europe	Norway	Forsa				forest	subpolar coniferous forest	5.13202
S1374	68.46	15.87	Europe	Norway	Austre Kanstad				forest	temperate broadleaf forest	5.04323
S1375	68.46	15.88	Europe	Norway	Austre Kanstad				grassland	temperate grassland	4.67295
S1376	68.47	15.89	Europe	Norway	Austre Kanstad				forest	subpolar coniferous forest	5.35955
S139	38.47	-9	Europe	Portugal	Arrabida				forest	temperate broadleaf forest	5.12955
S140	38.79	-9.42	Europe	Portugal	Sintra				forest	temperate coniferous forest	5.02729
S208	58.16	22.5	Europe	Estonia	Abruka				forest	temperate broadleaf forest	6.13382
S209	58.49	22.52	Europe	Estonia	Abruka				forest	temperate broadleaf forest	5.37709
S225	58.37	26.56	Europe	Estonia	Ilmatsalu				forest	temperate coniferous forest	4.51202
S225y	58.37	26.56	Europe	Estonia	Ilmatsalu				forest	temperate coniferous forest	4.29248
S225z	58.37	26.56	Europe	Estonia	Ilmatsalu				forest	temperate coniferous forest	4.27371
S226	58.42	26.59	Europe	Estonia	Kardla				forest	temperate coniferous forest	5.74516
S226y	58.42	26.59	Europe	Estonia	Kardla				forest	temperate coniferous forest	5.51925
S226z	58.42	26.59	Europe	Estonia	Kardla				forest	temperate coniferous forest	5.37249
S227	58.14	25.54	Europe	Estonia	Polli				forest	temperate broadleaf forest	5.42064
S228	58.35	26.6	Europe	Estonia	Haagejarv				forest	temperate broadleaf forest	5.71885
S229	58.14	27.01	Europe	Estonia	Kiidjarve park				anthropogenic	village	5.63419
S234	69.17	27	Europe	Finland	Inari				forest	subpolar coniferous forest	5.79839
S234z	69.17	27	Europe	Finland	Inari				forest	subpolar coniferous forest	5.45065
S235	66.67	25.31	Europe	Finland	Pohtimolampi				forest	subpolar coniferous forest	5.30483
S236	66.17	25.16	Europe	Finland	Raemaki				forest	subpolar coniferous forest	5.04514
S236z	66.17	25.16	Europe	Finland	Raemaki				forest	subpolar coniferous forest	5.21193
S237	66.66	25.33	Europe	Finland	Pohtimolampi				forest	subpolar coniferous forest	5.34947
S237z	66.66	25.33	Europe	Finland	Pohtimolampi				forest	subpolar coniferous forest	3.85778
S238	68.97	20.94	Europe	Finland	Finland	Kilpisjarvi			forest	subpolar coniferous forest	5.66762
S238z	68.97	20.94	Europe	Finland	Finland	Kilpisjarvi			forest	subpolar coniferous forest	4.83321
S239	62.61	12.62	Europe	Sweden	Hamrafjallet				tundra	tundra	5.60753
S240	69.48	18.86	Europe	Norway	Malangseidet				forest	subpolar coniferous forest	3.66389
S241	69.55	18.47	Europe	Norway	Kvaloya				forest	temperate broadleaf forest	3.91326
S243	67.86	19.48	Europe	Sweden	Nikkaluokta				forest	subpolar coniferous forest	5.39685
S244	61.15	16.89	Europe	Sweden	Gavle				forest	subpolar coniferous forest	5.31748
S245	62.59	12.6	Europe	Sweden	Hamrafjallet				forest	subpolar coniferous forest	6.02146
S246	58.43	26.53	Europe	Estonia	Karevere				forest	temperate broadleaf forest	5.28134
S249	57.88	27.69	Europe	Estonia	Mustoja				forest	temperate coniferous forest	4.50025
S270	58.2	26.81	Europe	Estonia	Sirvaku				forest	temperate broadleaf forest	5.30817
S271	59.4	24.73	Europe	Estonia	Jarve				forest	temperate coniferous forest	4.97757
S272	58.33	21.96	Europe	Estonia	Kuusn0mme				forest	temperate coniferous forest	5.38596
S273	58.38	22.11	Europe	Estonia	Odalatsi				forest	temperate coniferous forest	5.6045
S274	57.94	27.04	Europe	Estonia	Joosu				anthropogenic	village	5.39812
S276	59.46	24.46	Europe	Estonia	Merikulli				forest	temperate broadleaf forest	5.32139
S277	58.04	27.05	Europe	Estonia	Intsikurmu				forest	temperate broadleaf forest	5.65511
S278	58.8	23	Europe	Estonia	Saarnaki				forest	temperate broadleaf forest	6.14199
S279	46.11	7.92	Europe	Switzerland	Saas Fee				forest	temperate coniferous forest	5.30026
S280	58.37	26.69	Europe	Estonia	Tartu	Ravila-Viljandi mnt.			anthropogenic	urban	5.58825
S281	58.38	26.71	Europe	Estonia	Tartu	Taara-Naituse			anthropogenic	urban	4.15061
S282	58.43	26.57	Europe	Estonia	Mudaniku				forest	temperate coniferous forest	4.7152
S283	58.32	26.62	Europe	Estonia	Kulitse				forest	temperate broadleaf forest	4.38993
S286	50.25	12.7	Europe	Czech Republic	Sokolov				forest	temperate broadleaf forest	5.70742
S287	50.25	12.68	Europe	Czech Republic	Sokolov				forest	temperate coniferous forest	6.33959
S288	50.24	12.68	Europe	Czech Republic	Sokolov				forest	temperate broadleaf forest	5.48835
S289	59.02	26.23	Europe	Estonia	Kamariku				forest	temperate coniferous forest	5.17521
S290	78.92	11.95	Europe	Svalbard	Ny Alesund				tundra	tundra	5.17252
S291	78.92	11.97	Europe	Svalbard	Ny Alesund				tundra	tundra	5.66097
S292	79.66	11.31	Europe	Svalbard	NW Spitsbergen				tundra	tundra	4.30528
S293	78.21	15.73	Europe	Svalbard	Isdammen				tundra	tundra	5.17549
S294	78.17	15.66	Europe	Svalbard	Endalen				tundra	tundra	5.30045
S295	78.2	15.7	Europe	Svalbard	Ermakstotta				tundra	tundra	4.00977
S300	35.18	24.93	Europe	Greece	Crete				forest	mediterranean forest	5.26269
S301	35.2	24.91	Europe	Greece	Crete				forest	mediterranean forest	5.27445
S302	35.18	24.93	Europe	Greece	Crete				forest	mediterranean forest	5.15088
S325	58.37	22.69	Europe	Estonia	Puhametsa				forest	temperate broadleaf forest	5.17204
S326	58.43	26.78	Europe	Estonia	K0rvekula				forest	temperate broadleaf forest	5.90702
S327	58.45	26.75	Europe	Estonia	Lombi				forest	temperate broadleaf forest	5.60881
S328	58.33	26.77	Europe	Estonia	Aardlapalu				forest	temperate broadleaf forest	5.92514
S329	58.35	26.77	Europe	Estonia	Kaagvere park				anthropogenic	village	5.51977
S330	58.33	26.61	Europe	Estonia	Kulitse K0ivusalu				forest	temperate broadleaf forest	5.52934
S331	58.29	26.64	Europe	Estonia	Ropka mets				forest	temperate broadleaf forest	5.77362
S332	58.28	26.99	Europe	Estonia	Hirmuste				forest	temperate broadleaf forest	5.30326
S333	58.33	26.82	Europe	Estonia	Haaslava				forest	temperate broadleaf forest	6.03788
S334	57.95	22.12	Europe	Estonia	S0rve				forest	temperate broadleaf forest	5.74917
S335	45.9	25.74	Europe	Romania	Arcus				forest	temperate broadleaf forest	4.72804
S336	58.37	26.56	Europe	Estonia	Ilmatsalu				forest	temperate coniferous forest	4.77179
S337	58.37	26.56	Europe	Estonia	Ilmatsalu				forest	temperate coniferous forest	5.08748
S338	58.37	26.56	Europe	Estonia	Ilmatsalu				forest	temperate coniferous forest	4.85582
S339	58.37	26.56	Europe	Estonia	Ilmatsalu				forest	temperate coniferous forest	5.21633
S340	58.37	26.56	Europe	Estonia	Ilmatsalu				forest	temperate coniferous forest	4.71567
S341	58.37	26.56	Europe	Estonia	Ilmatsalu				forest	temperate coniferous forest	4.67807
S342	58.42	26.59	Europe	Estonia	Kardla				forest	temperate coniferous forest	5.42302
S343	58.42	26.59	Europe	Estonia	Kardla				forest	temperate coniferous forest	5.6757
S344	58.42	26.59	Europe	Estonia	Kardla				forest	temperate coniferous forest	5.49218
S345	58.42	26.59	Europe	Estonia	Kardla				forest	temperate coniferous forest	5.47729
S346	58.42	26.59	Europe	Estonia	Kardla				forest	temperate coniferous forest	4.45802
S347	58.42	26.59	Europe	Estonia	Kardla				forest	temperate coniferous forest	5.82196
S360	58.36	26.75	Europe	Estonia	Siili				forest	temperate broadleaf forest	5.91305
S364	58.67	23.69	Europe	Estonia	Jarise				forest	temperate broadleaf forest	5.90901
S373	57.66	12	Europe	Sweden	Göteborg	Ellesbo			forest	temperate broadleaf forest	5.00658
S374	57.84	12	Europe	Sweden	Göteborg	Labbera			forest	temperate broadleaf forest	5.39705
S382	58.37	26.7	Europe	Estonia	Tartu lastehaigla				anthropogenic	urban	4.77032
S383	58.39	26.7	Europe	Estonia	Tartu Laululava				anthropogenic	urban	5.64847
S422	56.01	12.34	Europe	Denmark	Kalvehave				forest	temperate broadleaf forest	5.59491
S423	55.99	12.27	Europe	Denmark	Kageruphus				forest	temperate broadleaf forest	5.13338
S424	56.05	12.33	Europe	Denmark	Nederste Kobbel				forest	temperate broadleaf forest	5.04901
S425	56.02	12.36	Europe	Denmark	Fændriksvang				forest	temperate broadleaf forest	5.36839
S426	56.03	12.34	Europe	Denmark	Kistrupvang				forest	temperate broadleaf forest	5.58788
S429	48.25	16.17	Europe	Austria	Mauerbuch				unknown	unknown	5.23653
S430	NA	NA	Europe	Austria	Kolbeterby				unknown	unknown	5.18543
S437	51.81	3.86	Europe	Netherlands	Goedereede				shrubland	temperate shrubland	4.87916
S438	52.14	4.34	Europe	Netherlands	Meijendel				shrubland	temperate shrubland	5.22839
S439	52.34	4.53	Europe	Netherlands	Haarlem				shrubland	temperate shrubland	2.34703
S440	52.82	4.71	Europe	Netherlands	Callantsoog				shrubland	temperate shrubland	5.25529
S441	52.14	4.34	Europe	Netherlands	Terschelling				shrubland	temperate shrubland	4.83698
S446	58.6	23.29	Europe	Estonia	M0ega				woodland	temperate woodland	5.61957
S447	58.61	23.17	Europe	Estonia	Piiri				forest	temperate broadleaf forest	5.29077
S448	58.57	23.21	Europe	Estonia	Lahekula				forest	temperate broadleaf forest	4.63726
S449	58.55	23.07	Europe	Estonia	Orissaare				forest	temperate broadleaf forest	5.57798
S450	64.01	-19.9	Europe	Iceland	Galtalaekjarskogur				tundra	tundra	4.36821
S451	58.46	26.08	Europe	Estonia	Meleski				forest	temperate broadleaf forest	6.26371
S452	58.49	26.05	Europe	Estonia	R0ika park				anthropogenic	village	5.29654
S453	58.56	25.55	Europe	Estonia	Olustvere Papiorg				forest	temperate broadleaf forest	5.34561
S454	58.48	25.52	Europe	Estonia	Leederti				forest	temperate broadleaf forest	5.35252
S455	65.86	-17.05	Europe	Iceland	Theistareykir				tundra	tundra	4.87043
S456	65.13	-19.67	Europe	Iceland	Audkuluheidi				tundra	tundra	5.13731
S457	59.14	27.82	Europe	Estonia	Gorodenka Raudsaar				forest	temperate broadleaf forest	5.59374
S458	58.97	22.85	Europe	Estonia	Hiiumaa	Palade			forest	temperate broadleaf forest	5.03992
S459	58.79	22.47	Europe	Estonia	Hiiumaa	Kitsa			forest	temperate broadleaf forest	5.52705
S460	58.93	22.17	Europe	Estonia	Hiiumaa	Suurepsi			forest	temperate coniferous forest	5.11739
S461	58.83	23.12	Europe	Estonia	Hiiumaa	Heinlaid			forest	temperate broadleaf forest	5.28647
S462	58.84	23.12	Europe	Estonia	Hiiumaa	Heinlaid			forest	temperate broadleaf forest	5.57322
S463	58.75	23.09	Europe	Estonia	Hiiumaa	K0rgelaid			forest	temperate broadleaf forest	5.22682
S464	58.99	22.86	Europe	Estonia	Hiiumaa	Kukka			forest	temperate broadleaf forest	5.41945
S465	58.9	22.26	Europe	Estonia	Hiiumaa	Suureranna			forest	temperate broadleaf forest	5.46385
S466	58.92	22.33	Europe	Estonia	Hiiumaa	Parnaku			forest	temperate coniferous forest	5.31842
S467	58.92	22.06	Europe	Estonia	Hiiumaa	Ristna			forest	temperate coniferous forest	4.91118
S468	58.91	22.67	Europe	Estonia	Hiiumaa	Pihla			forest	temperate broadleaf forest	5.21314
S469	58.98	22.86	Europe	Estonia	Hiiumaa	Kukka			forest	temperate broadleaf forest	5.65444
S470	58.91	22.52	Europe	Estonia	Hiiumaa	Huti			forest	temperate coniferous forest	4.02064
S471	58.85	22.57	Europe	Estonia	Hiiumaa	Tihu			forest	temperate coniferous forest	4.61549
S472	58.7	22.51	Europe	Estonia	Hiiumaa	S0ru park			woodland	temperate woodland	5.43034
S473	58.72	22.53	Europe	Estonia	Hiiumaa	Sepaste			forest	temperate broadleaf forest	4.94329
S474	58.72	22.52	Europe	Estonia	Hiiumaa	Sepaste			forest	temperate broadleaf forest	4.88821
S475	58.72	22.51	Europe	Estonia	Hiiumaa	Sepaste			forest	temperate broadleaf forest	5.26421
S476	58.78	23.04	Europe	Estonia	Hiiumaa	Hanikatsi			forest	temperate broadleaf forest	5.32279
S477	58.78	23.05	Europe	Estonia	Hiiumaa	Hanikatsi			woodland	temperate woodland	5.15063
S478	58.77	23.05	Europe	Estonia	Hiiumaa	Hanikatsi			forest	temperate broadleaf forest	5.33793
S479	58.91	23.64	Europe	Estonia	Kabrametsa				forest	temperate broadleaf forest	5.34608
S480	58.8	25.22	Europe	Estonia	Karu				forest	temperate broadleaf forest	5.37037
S481	58.8	25.27	Europe	Estonia	Kolu				anthropogenic	village	4.76924
S482	59.33	24.57	Europe	Estonia	Saue manor				anthropogenic	village	5.50873
S483	58.18	27.38	Europe	Estonia	P0lvamaa	K0nnu			anthropogenic	village	5.64604
S484	58.22	27.44	Europe	Estonia	Meeksi				forest	temperate broadleaf forest	5.53543
S485	58.2	26.58	Europe	Estonia	Pangodi				forest	temperate broadleaf forest	5.60759
S487	58.19	26.21	Europe	Estonia	Valguta				anthropogenic	village	5.04554
S488	58.23	26.3	Europe	Estonia	Suure-Konguta				anthropogenic	village	5.45109
S489	58.21	26.26	Europe	Estonia	Konguta				forest	temperate broadleaf forest	4.37943
S490	58.24	26.22	Europe	Estonia	Rannu				anthropogenic	village	3.77975
S491	59.37	27.5	Europe	Estonia	Linna				forest	temperate coniferous forest	4.59545
S492	59.23	27.39	Europe	Estonia	Atsalama				woodland	temperate woodland	5.62687
S493	58.68	24.6	Europe	Estonia	Pööravere				forest	temperate broadleaf forest	5.28512
S494	57.63	18.3	Europe	Sweden	Visby				forest	temperate broadleaf forest	5.69815
S495	58.37	26.56	Europe	Estonia	Ilmatsalu				forest	temperate coniferous forest	5.28482
S496	58.42	26.59	Europe	Estonia	Kardla				forest	temperate coniferous forest	5.24565
S497	58.42	26.59	Europe	Estonia	Kardla				forest	temperate coniferous forest	5.12969
S498	58.42	26.59	Europe	Estonia	Kardla				forest	temperate coniferous forest	5.15382
S499	58.42	26.59	Europe	Estonia	Kardla				forest	temperate coniferous forest	5.59877
S500	58.55	23.99	Europe	Estonia	Parnumaa	L0pe			forest	temperate broadleaf forest	5.23146
S501	58.51	24.11	Europe	Estonia	Parnumaa	Natsi			forest	temperate broadleaf forest	5.77312
S502	58.5	24.11	Europe	Estonia	Parnumaa	Vana0ue			woodland	temperate woodland	5.70046
S503	58.49	24.14	Europe	Estonia	Parnumaa	Soeva			anthropogenic	village	5.90094
S504	58.59	24.35	Europe	Estonia	Parnumaa	Lavassaare			forest	temperate broadleaf forest	5.42178
S505	58.38	24.06	Europe	Estonia	Parnumaa	Ermistu			forest	temperate broadleaf forest	5.26254
S506	58.4	24.09	Europe	Estonia	Parnumaa	Audru	Soomra		forest	temperate broadleaf forest	4.84237
S507	58.04	26.46	Europe	Estonia	Valgamaa	Otepaa	Puhajarve saar		forest	temperate broadleaf forest	5.51981
S508	59.08	23.74	Europe	Estonia	Laanema	Noarootsi	Leidisoo		anthropogenic	village	4.95559
S509	59	23.48	Europe	Estonia	Laanema	Noarootsi	Paslepa		forest	temperate broadleaf forest	4.87145
S510	58.13	23.98	Europe	Estonia	Parnumaa	Kihnu	Rahvamaja		anthropogenic	village	5.24159
S511	58.14	23.99	Europe	Estonia	Parnumaa	Mario aed			woodland	temperate woodland	5.43207
S512	58.13	23.97	Europe	Estonia	Parnumaa	Kihnu	Kihnu 1B		anthropogenic	village	5.2332
S516	58.37	26.56	Europe	Estonia	Ilmatsalu				forest	temperate coniferous forest	4.50746
S517	58.37	26.56	Europe	Estonia	Ilmatsalu				forest	temperate coniferous forest	4.54961
S518	58.37	26.56	Europe	Estonia	Ilmatsalu				forest	temperate coniferous forest	5.41804
S519	43.14	16.53	Europe	Croatia	Hvar	Dubovica			forest	temperate coniferous forest	4.8831
S525	41.76	23.53	Europe	Bulgaria	Blagoevgrad	Dobrinishte			forest	temperate broadleaf forest	5.63669
S526	41.74	23.53	Europe	Bulgaria	Blagoevgrad	Dobrinishte			forest	temperate coniferous forest	4.14222
S528	43.05	27.87	Europe	Bulgaria	Bliznatsi				forest	temperate broadleaf forest	6.04963
S542	48.98	13.81	Europe	Czech Republic	Boubinskyi				forest	temperate broadleaf forest	4.14395
S543	59.46	26.01	Europe	Estonia	Laane-Viru	Viitna			forest	temperate coniferous forest	4.54292
S544	59.42	26.14	Europe	Estonia	Laane-Viru	Aaspere park			anthropogenic	village	5.0114
S545	59.57	26.27	Europe	Estonia	Laane-Viru	Vainupea			forest	temperate coniferous forest	4.11324
S546	59.5	26.31	Europe	Estonia	Laane-Viru	Kandle			forest	temperate broadleaf forest	5.53213
S547	59.39	26.38	Europe	Estonia	Laane-Viru	Arkna park			anthropogenic	village	5.78484
S548	59.04	26.74	Europe	Estonia	Ilistvere				forest	temperate broadleaf forest	5.17953
S549	59.28	26.35	Europe	Estonia	Inju				forest	temperate broadleaf forest	5.2232
S550	57.55	26.56	Europe	Estonia	Karisöödi				anthropogenic	village	4.9605
S551	59.28	26.25	Europe	Estonia	Levala				woodland	temperate woodland	5.70909
S552	58.97	26.6	Europe	Estonia	Luusika				forest	temperate broadleaf forest	5.75292
S553	59.3	26.25	Europe	Estonia	Madapea				forest	temperate broadleaf forest	5.44418
S554	59.32	26.26	Europe	Estonia	Madapea tammik				woodland	temperate woodland	5.86643
S556	59.2	26.16	Europe	Estonia	Porkuni				forest	temperate broadleaf forest	5.55697
S557	59.1	26.53	Europe	Estonia	Rahkla				anthropogenic	village	5.62156
S558	59.34	26.35	Europe	Estonia	Rakvere				anthropogenic	urban	4.98535
S559	59.14	26.16	Europe	Estonia	Saase				forest	temperate broadleaf forest	5.2108
S560	58.99	26.34	Europe	Estonia	Tammiku				forest	temperate broadleaf forest	5.09501
S561	59.17	26.07	Europe	Estonia	Tamsalu				woodland	temperate woodland	5.4186
S562	59.12	26.32	Europe	Estonia	Triigi				forest	temperate broadleaf forest	5.01079
S563	59.21	26.32	Europe	Estonia	Veadla				forest	temperate broadleaf forest	5.36435
S564	59.21	26.39	Europe	Estonia	Veadla				forest	temperate broadleaf forest	4.20647
S565	59.29	26.43	Europe	Estonia	Vinni				forest	temperate broadleaf forest	5.08749
S566	59.21	26.43	Europe	Estonia	Viru-Jaagupi				woodland	temperate woodland	5.51067
S568	59.26	26.43	Europe	Estonia	Viru-Jaagupi				woodland	temperate woodland	5.0587
S569	58.38	22.21	Europe	Estonia	Saaremaa	Laane-Saare	Paikula		forest	temperate broadleaf forest	5.47049
S570	58.48	22.95	Europe	Estonia	Saaremaa	Laimjala	N0mme		forest	temperate broadleaf forest	4.59085
S571	58.37	22.2	Europe	Estonia	Saaremaa	Laane-Saare	Paikula		forest	temperate broadleaf forest	3.89141
S572	58.49	22.22	Europe	Estonia	Saaremaa	Mustjala	Kaugalepa		forest	temperate broadleaf forest	5.56002
S573	58.44	22.04	Europe	Estonia	Saaremaa	Kihelkonna	Kehila		forest	temperate coniferous forest	5.358
S574	58.47	22.31	Europe	Estonia	Saaremaa	Mustjala	Kudema		anthropogenic	village	5.3946
S575	57.53	26.51	Europe	Estonia	Valgamaa	Villike			forest	temperate coniferous forest	1.61907
S576	57.54	26.59	Europe	Latvia	Leppura				anthropogenic	village	5.36771
S577	58.03	26.4	Europe	Estonia	K0lli				forest	temperate coniferous forest	5.42407
S578	57.58	26.65	Europe	Estonia	V0rumaa	Tundu			forest	temperate broadleaf forest	5.86593
S579	57.57	26.67	Europe	Estonia	V0rumaa	Vastse-Roosa park			anthropogenic	village	5.43028
S580	58.28	24.73	Europe	Estonia	Parnumaa	Metsaaare LKA			forest	temperate coniferous forest	5.23464
S581	58.31	24.69	Europe	Estonia	Parnumaa	Vaskraama park			anthropogenic	village	5.42136
S582	58.34	24.66	Europe	Estonia	Parnumaa	Vaskj0e LKA			forest	temperate coniferous forest	5.41249
S583	58.33	27.19	Europe	Estonia	Tartumaa	V0nnu	Ahunapalu		forest	temperate broadleaf forest	5.63343
S584	59.18	24.56	Europe	Estonia	Harjumaa	Saue	Tagametsa		forest	temperate broadleaf forest	4.66678
S585	59.14	24.23	Europe	Estonia	Harjumaa	Nissi	Tabara		forest	temperate coniferous forest	4.85014
S586	59.02	24.41	Europe	Estonia	Raplamaa	Marjamaa	Purga		forest	temperate broadleaf forest	5.43044
S587	59.02	24.38	Europe	Estonia	Raplamaa	Marjamaa	Russalu		anthropogenic	village	5.28649
S588	59.08	24.31	Europe	Estonia	Harjumaa	Nissi	Nurme		forest	temperate broadleaf forest	5.36662
S589	59.1	24.34	Europe	Estonia	Harjumaa	Nissi	urjaste		forest	temperate broadleaf forest	5.96136
S590	59.02	24.28	Europe	Estonia	Harjumaa	Nissi	Lehetu		forest	temperate broadleaf forest	5.32588
S591	59.04	24.51	Europe	Estonia	Raplamaa	Marjamaa	P0lli		forest	temperate coniferous forest	5.23135
S593	58.47	26.73	Europe	Estonia	Vasula puisniit				woodland	temperate woodland	6.03786
S594	57.56	26.54	Europe	Estonia	Peetri j0e MKA				forest	temperate broadleaf forest	5.5925
S595	58.03	26.48	Europe	Estonia	K0rgepalu				forest	temperate broadleaf forest	5.24613
S631	41.71	-8.84	Europe	Portugal	Peneda-Geres				forest	temperate broadleaf forest	5.11904
S632	28.33	-16.53	Europe	Spain	Tenerife	Ramon el Caminero			forest	subtropical coniferous forest	5.04415
S672	58.14	24.01	Europe	Estonia	Kihnu				forest	temperate coniferous forest	4.86392
S673	58.14	23.97	Europe	Estonia	Kihnu				forest	temperate coniferous forest	4.5953
S674	58.63	23.02	Europe	Estonia	K0inastu				forest	temperate broadleaf forest	5.38736
S675	58.01	22.13	Europe	Estonia	Viieristi				forest	temperate broadleaf forest	5.66525
S676	58.31	22.42	Europe	Estonia	Randvere				forest	temperate broadleaf forest	5.22382
S677	58.28	22.54	Europe	Estonia	Upa				forest	temperate broadleaf forest	5.45716
S678	58.28	22.54	Europe	Estonia	Upa				forest	temperate broadleaf forest	5.53894
S679	58.4	22.25	Europe	Estonia	Lihulinna maalinn				forest	temperate coniferous forest	4.86915
S680	58.23	22.08	Europe	Estonia	Koki				grassland	temperate grassland	5.63835
S681	58.27	22.12	Europe	Estonia	Viidumae				forest	temperate broadleaf forest	5.31758
S682	58.49	21.96	Europe	Estonia	P0dragu				forest	temperate broadleaf forest	5.21134
S683	58.44	22.29	Europe	Estonia	Ohtja				forest	temperate broadleaf forest	4.76664
S684	58.47	22.31	Europe	Estonia	Kudema				anthropogenic	village	5.005
S685	58.35	22.08	Europe	Estonia	Mihkli talumuuseum				woodland	temperate woodland	5.28354
S686	58.15	22.5	Europe	Estonia	Abruka				forest	temperate broadleaf forest	5.79315
S689	42.62	18.12	Europe	Croatia	Lokrum				forest	temperate coniferous forest	4.56245
S690	42.4	18.84	Europe	Montenegro	Lovcem				forest	temperate broadleaf forest	5.4536
S701	57.79	23.27	Europe	Estonia	Ruhnu L0unasadam				forest	temperate coniferous forest	4.8751
S702	57.8	23.26	Europe	Estonia	Ruhnu tuletorn				forest	temperate coniferous forest	4.63222
S703	57.81	23.24	Europe	Estonia	Ruhnu Keila				anthropogenic	village	4.27099
S704	NA	NA	Europe	Estonia	Parnumaa	Vaskj0e LKA			forest	temperate broadleaf forest	5.315
S705	58.42	24.98	Europe	Estonia	Kikepera				forest	temperate coniferous forest	6.03964
S708	60.61	7.55	Europe	Norway	Finse				tundra	tundra	6.17113
S719	58.42	26.59	Europe	Estonia	Kardla				forest	temperate coniferous forest	5.62106
S732	55.58	27.81	Europe	Belarus	Elnja				forest	temperate broadleaf forest	5.65065
S794	32.73	-16.89	Europe	Portugal	Madeira	Ribeiro Frio			forest	subtropical broadleaf forest	5.26363
S795	37.96	12.07	Europe	Italy	Marettimo	Case Romane			shrubland	temperate shrubland	4.93724
S796	37.99	12.06	Europe	Italy	Marettimo	Punta Troia			shrubland	temperate shrubland	5.61082
S797	38	14.14	Europe	Italy	Palermo	Pollina			forest	mediterranean forest	5.62063
S798	37.93	13.97	Europe	Italy	Palermo	Mongerrati			forest	mediterranean forest	5.87276
S799	37.98	13.48	Europe	Italy	Palermo	Bolognetta			shrubland	temperate shrubland	5.22201
S800	37.97	13.49	Europe	Italy	Palermo	Bolognetta			shrubland	temperate shrubland	5.54843
S801	38.22	13.3	Europe	Italy	Palermo	Pizzo Sella			shrubland	temperate shrubland	5.42032
S802	37.11	14.5	Europe	Italy	Caltagirone	Bosco di Santo Pietro			shrubland	temperate shrubland	5.4952
S803	37.11	14.5	Europe	Italy	Caltagirone	Bosco di Santo Pietro			shrubland	temperate shrubland	4.63693
S804	37.11	14.51	Europe	Italy	Caltagirone	Bosco di Santo Pietro			shrubland	temperate shrubland	5.46012
S805	37.34	13.39	Europe	Italy	Agrigento	Siculiana Marina			shrubland	temperate shrubland	3.19882
S806	36.78	12	Europe	Italy	Pantelleria	Grotta dei Briganti			shrubland	temperate shrubland	5.65922
S807	36.78	12	Europe	Italy	Pantelleria	Sibà Piccola			shrubland	temperate shrubland	5.09404
S808	36.77	12.01	Europe	Italy	Pantelleria	Monte Gibele			shrubland	temperate shrubland	4.77798
S809	37.89	14.13	Europe	Italy	Geraci Siculo	Sughereta di Geraci			forest	mediterranean forest	5.98598
S810	38.01	14.42	Europe	Italy	Caronia	Monte Pagano			forest	mediterranean forest	5.37712
S811	38	14.43	Europe	Italy	Caronia	Monte Pagano			forest	mediterranean forest	5.47344
S812	37.93	13.97	Europe	Italy	Collesano	Mongerrati			forest	mediterranean forest	5.44843
S813	37.96	13.91	Europe	Italy	Collesano	Casa Lo Curto			forest	mediterranean forest	6.15714
S814	58.38	26.72	Europe	Estonia	Tartu	Lai 40			anthropogenic	urban	5.40465
S815	59.47	24.88	Europe	Estonia	Tallinn	Botanical Garden			anthropogenic	urban	5.42023
S817N	28.13	-17.26	Europe	Spain	La Gomera	Las Hayas			forest	subtropical coniferous forest	4.33946
S816N	28.54	-16.22	Europe	Spain	Tenerife	Las Casas de la Cumbre			forest	subtropical broadleaf forest	4.90623
S828	59.42	24.66	Europe	Estonia	Tallinn	Zoo			anthropogenic	urban	4.76468
S829	58.38	26.72	Europe	Estonia	Tartu	Botanical Garden glasshouse			anthropogenic	urban	4.97235
S830	47.58	12.94	Europe	Germany	Königsee				forest	temperate coniferous forest	6.21617
S831	47.57	12.9	Europe	Germany	Antenbichl				forest	temperate coniferous forest	5.49744
S832	47.56	13.02	Europe	Germany	Schneibstein				forest	temperate coniferous forest	5.85436
S833	47.58	13.04	Europe	Germany	Mitterkaser				grassland	montane grassland	6.17992
S834	47.56	13.06	Europe	Austria	Schneibstein				grassland	montane grassland	5.68423
S835	47.57	13.05	Europe	Austria	Schneibstein				shrubland	montane shrubland	5.09961
S836	47.53	12.96	Europe	Germany	Schrainbach				forest	temperate broadleaf forest	4.36291
S837	47.53	12.96	Europe	Germany	Schrainbach				forest	temperate broadleaf forest	4.87935
S838	59.22	23.62	Europe	Estonia	Vihterpalu				forest	temperate coniferous forest	3.45625
S839	59.22	23.61	Europe	Estonia	Vihterpalu				forest	temperate coniferous forest	4.58615
S840	59.22	23.6	Europe	Estonia	Vihterpalu				forest	temperate coniferous forest	4.28185
S841	59.17	23.72	Europe	Estonia	Vihterpalu				forest	temperate coniferous forest	4.21919
S842	59.17	23.7	Europe	Estonia	Vihterpalu				forest	temperate coniferous forest	4.59811
S843	59.17	23.7	Europe	Estonia	Vihterpalu				forest	temperate coniferous forest	4.57077
S844	59.24	23.83	Europe	Estonia	Vihterpalu				forest	temperate coniferous forest	4.32434
S845	59.24	23.83	Europe	Estonia	Vihterpalu				forest	temperate coniferous forest	3.43239
S846	59.24	23.83	Europe	Estonia	Vihterpalu				forest	temperate coniferous forest	4.58606
S847	59.21	23.81	Europe	Estonia	Vihterpalu				forest	temperate coniferous forest	4.34911
S848	59.21	23.81	Europe	Estonia	Vihterpalu				forest	temperate coniferous forest	4.53143
S849	59.21	23.81	Europe	Estonia	Vihterpalu				forest	temperate coniferous forest	4.52817
S850	59.22	23.82	Europe	Estonia	Vihterpalu				forest	temperate coniferous forest	4.88269
S851	59.22	23.82	Europe	Estonia	Vihterpalu				forest	temperate coniferous forest	4.75733
S852	59.22	23.82	Europe	Estonia	Vihterpalu				forest	temperate coniferous forest	4.76929
S853	59.18	23.77	Europe	Estonia	Vihterpalu				forest	temperate coniferous forest	4.42787
S854	59.18	23.77	Europe	Estonia	Vihterpalu				forest	temperate coniferous forest	4.42546
S855	59.19	23.77	Europe	Estonia	Vihterpalu				forest	temperate coniferous forest	4.71369
S856	57.9	25.83	Europe	Estonia	Jeti				forest	temperate coniferous forest	3.93394
S857	57.9	25.83	Europe	Estonia	Jeti				forest	temperate coniferous forest	3.44301
S952	49.75	14.8	Europe	Czech Republic	Jemniste				forest	temperate broadleaf forest	6.04936
S953	49.67	14.58	Europe	Czech Republic	Vrchotovy Janovice				forest	temperate broadleaf forest	5.8586
S954	49.7	14.6	Europe	Czech Republic	Vrchotovy Janovice				forest	temperate broadleaf forest	5.06386
S955	50.21	14.44	Europe	Czech Republic	Panenské Brezany				forest	temperate broadleaf forest	5.45626
S956	50.22	14.44	Europe	Czech Republic	Panenské Brezany				forest	temperate broadleaf forest	5.92223
S957	50.19	14.53	Europe	Czech Republic	Mesice				forest	temperate broadleaf forest	5.94761
S958	50.2	14.53	Europe	Czech Republic	Mesice				forest	temperate broadleaf forest	5.34249
S959	49.78	14.66	Europe	Czech Republic	Konopiste				forest	temperate broadleaf forest	5.87047
S960	49.78	14.67	Europe	Czech Republic	Konopiste				forest	temperate broadleaf forest	4.36727
S961	49.78	14.18	Europe	Czech Republic	Dobrís				forest	temperate broadleaf forest	5.03343
S962	49.77	14.17	Europe	Czech Republic	Dobrís				forest	temperate broadleaf forest	5.90444
S963	49.67	13.53	Europe	Czech Republic	Kozel				forest	temperate broadleaf forest	5.76469
S964	49.69	13.46	Europe	Czech Republic	Kozel				forest	temperate broadleaf forest	5.22917
S965	49.51	14.16	Europe	Czech Republic	Orlík nad Vltavou				forest	temperate broadleaf forest	6.0043
S966	49.5	14.17	Europe	Czech Republic	Orlík nad Vltavou				forest	temperate broadleaf forest	5.68606
S967	49.44	14.11	Europe	Czech Republic	Vráz				forest	temperate broadleaf forest	5.83903
S968	49.99	14.54	Europe	Czech Republic	Pruhonice				forest	temperate broadleaf forest	5.21559
S969	50.02	14.54	Europe	Czech Republic	Pruhonice				forest	temperate broadleaf forest	4.51583
S970	49.97	15.42	Europe	Czech Republic	zehusice				forest	temperate broadleaf forest	5.57793
S971	49.98	15.36	Europe	Czech Republic	zehusice				forest	temperate broadleaf forest	5.03744
S972	49.98	15.34	Europe	Czech Republic	Kacina				forest	temperate broadleaf forest	6.14924
S973	49.97	15.32	Europe	Czech Republic	Kacina				forest	temperate broadleaf forest	5.95465
S974	50.27	14.33	Europe	Czech Republic	Veltrusy				forest	temperate broadleaf forest	5.31366
S975	50.35	14.33	Europe	Czech Republic	Veltrusy				forest	temperate broadleaf forest	5.39075
S976	50.56	14.2	Europe	Czech Republic	Ploskovice				forest	temperate broadleaf forest	5.2535
S977	50.57	14.18	Europe	Czech Republic	Ploskovice				forest	temperate broadleaf forest	5.27536
S978	50.33	15.28	Europe	Czech Republic	Kopidlno				forest	temperate broadleaf forest	3.93556
S979	50.32	15.25	Europe	Czech Republic	Kopidlno				forest	temperate broadleaf forest	5.73779
S980	50.29	15.03	Europe	Czech Republic	Loucen				forest	temperate broadleaf forest	5.74133
S981	50.29	15.02	Europe	Czech Republic	Loucen				forest	temperate broadleaf forest	4.81546
S982	49.19	15.45	Europe	Czech Republic	Telc				forest	temperate broadleaf forest	5.8148
S983	50.15	15.44	Europe	Czech Republic	Karlova Koruna				forest	temperate broadleaf forest	5.17763
S984	50.16	15.45	Europe	Czech Republic	Karlova Koruna				forest	temperate broadleaf forest	6.00776
S985	50.22	15.65	Europe	Czech Republic	Hrádek u Nechanic				forest	temperate broadleaf forest	4.73963
S986	50.22	15.67	Europe	Czech Republic	Hrádek u Nechanic				forest	temperate broadleaf forest	5.52368
S987	50.21	13.38	Europe	Czech Republic	Krásny dvur				forest	temperate broadleaf forest	5.44875
S988	50.25	13.37	Europe	Czech Republic	Krásny dvur				forest	temperate broadleaf forest	5.81055
S989	50.51	13.44	Europe	Czech Republic	Jirkov				forest	temperate broadleaf forest	5.52633
S990	50.38	13.14	Europe	Czech Republic	Klásterec n. Ohrí				forest	temperate broadleaf forest	5.61594
S991	50.38	13.18	Europe	Czech Republic	Klásterec n. Ohrí				forest	temperate broadleaf forest	5.86316
S992	50.62	14.54	Europe	Czech Republic	Zahrádky u ceské Lípy				forest	temperate broadleaf forest	4.56911
S993	50.64	14.52	Europe	Czech Republic	Zahrádky u ceské Lípy				forest	temperate broadleaf forest	5.91669
S994	NA	NA	Europe	Czech Republic					unknown	unknown	6.46631
S995	50.65	15.12	Europe	Czech Republic	Sychrov				forest	temperate broadleaf forest	5.88826
S996	50.63	15.09	Europe	Czech Republic	Sychrov				forest	temperate broadleaf forest	6.08255
S997	49.55	12.99	Europe	Czech Republic	Horsovsky Tyn				forest	temperate broadleaf forest	5.46687
S998	49.53	12.94	Europe	Czech Republic	Horsovsky Tyn				forest	temperate broadleaf forest	6.23004
S999	48.82	14.38	Europe	Czech Republic	Cesky Krumlov				forest	temperate broadleaf forest	5.76356
TR027	58.29	27.05	Europe	Estonia	V0nnu				anthropogenic	cropland	5.45835
TR030	58.49	26.8	Europe	Estonia	Kikivere				anthropogenic	cropland	5.36224
TR032	58.38	26.64	Europe	Estonia	Rahinge				anthropogenic	cropland	4.35483
TR036	58.33	26.93	Europe	Estonia	Kastre				anthropogenic	cropland	5.19518
TR039	58.46	26.72	Europe	Estonia	Vasula				anthropogenic	cropland	3.21573
TR046	58.47	26.72	Europe	Estonia	Vasula				anthropogenic	cropland	5.56012
TR047	58.29	27.05	Europe	Estonia	V0nnu				anthropogenic	cropland	4.87008
TR049	58.16	26.28	Europe	Estonia	Tilga				anthropogenic	cropland	5.32643
TR051	58.52	26.7	Europe	Estonia	Kukulinna				anthropogenic	cropland	5.04207
TR055	58.16	26.28	Europe	Estonia	Tilga				anthropogenic	cropland	5.16538
TR060	58.49	26.78	Europe	Estonia	Vedu				anthropogenic	cropland	5.48272
TR064	58.46	26.72	Europe	Estonia	Vasula				anthropogenic	cropland	4.47492
TR065	58.46	26.73	Europe	Estonia	Vasula				anthropogenic	cropland	5.08303
TR067	58.35	22.25	Europe	Estonia	Praakli				anthropogenic	cropland	5.01333
AEM_RS	39.94	-7.93	Europe	Portugal	Oleiros				anthropogenic	village	3.05607
AEM_FS	39.94	-7.93	Europe	Portugal	Oleiros				anthropogenic	plantation florest	3.11346
