# Supplementary material for: Extremotolerant Fungi in Resinous Soils: A Unique Diversity of Generalist and Specialized Hydrocarbon Degraders
Source: Research Square preprint supplement (doi:10.21203/rs.3.rs-8530099/v1), 2026-02-10
Supplement: Supplementary file 4 [file 63a4d3f4154dc6b02a676f2d.xlsx]

## Sheet: Table_S3
OTUs	Type|Abund	RS2.I	RS2.II	RS2.III	Accession Number	SH	E value	Max score	Total score	Query from	Query to	Hit from	Hit to	Identity	Positive	Similarity[%]	Coverage[%]	Query length	kingdom	phylum	class	order	family	genus	species
OTU001	MOSTABUND|n=15207/9585	5039	3019	7149	MT872624	SH0912804.10FU	7.73175e-044	180.245	97	1	150	578	729	134	134	89.3	100	150	k__Fungi	p__Ascomycota	c__Eurotiomycetes	o__Eurotiomycetes_ord_Incertae_sedis	f__Eurotiomycetes_fam_Incertae_sedis	g__Eurotiomycetes_gen_Incertae_sedis	s__Eurotiomycetes_sp
OTU002	MOSTABUND|n=7597/4182	2078	1286	4233	PP115452	SH0911881.10FU	3.83567e-108	394.457	213	1	213	308	520	213	213	100	100	213	k__Fungi	p__Basidiomycota	c__Microbotryomycetes	o__Sporidiobolales	f__Sporidiobolaceae	g__Sporobolomyces	s__Sporobolomyces_salmonicolor
OTU003	MOSTABUND|n=4182/2386	1336	1300	1546	EU030275	SH0828639.10FU	8.19364e-074	279.964	151	1	160	334	493	157	157	98.1	98.2	163	k__Fungi	p__Ascomycota	c__Eurotiomycetes	o__Chaetothyriales	f__Herpotrichiellaceae	g__Sorocybe	s__Sorocybe_resinae
OTU004	MOSTABUND|n=3095/1441	1256	487	1352	MN071391	SH1043354.10FU	3.99291e-113	411.077	222	1	222	297	518	222	222	100	100	222	k__Fungi	p__Fungi_phy_Incertae_sedis	c__Fungi_cls_Incertae_sedis	o__Fungi_ord_Incertae_sedis	f__Fungi_fam_Incertae_sedis	g__Fungi_gen_Incertae_sedis	s__Fungi_sp
OTU005	MOSTABUND|n=3080/1771	651	172	2257	FJ235127	SH0892767.10FU	1.25628e-097	359.37	194	1	194	407	600	194	194	100	100	194	k__Fungi	p__Ascomycota	c__Saccharomycetes	o__Saccharomycetales	f__Saccharomycetales_fam_Incertae_sedis	g__Candida	s__Candida_keroseneae
OTU006	MOSTABUND|n=2932/1499	1109	471	1352	MW710094	SH0733979.10FU	2.52731e-120	435.083	235	1	235	324	558	235	235	100	100	235	k__Fungi	p__Basidiomycota	c__Microbotryomycetes	o__Microbotryomycetes_ord_Incertae_sedis	f__Colacogloeaceae	g__Colacogloea	s__Colacogloea_philyla
OTU007	MOSTABUND|n=2572/1495	765	475	1332	OR069551	SH0767731.10FU	1.74869e-080	302.124	163	1	163	331	493	163	163	100	100	163	k__Fungi	p__Ascomycota	c__Eurotiomycetes	o__Eurotiales	f__Aspergillaceae	g__Penicillium	s__Penicillium_corylophilum
OTU008	MOSTABUND|n=2473/1399	867	436	1170	OR905858	SH0887078.10FU	4.49133e-097	357.524	193	1	193	394	586	193	193	100	100	193	k__Fungi	p__Ascomycota	c__Saccharomycetes	o__Saccharomycetales	f__Debaryomycetaceae	g__Debaryomyces	s__Debaryomyces_hansenii
OTU009	MOSTABUND|n=2340/716	846	438	1056	MH188916	SH0926074.10FU	4.26975e-118	427.696	231	1	237	347	584	236	236	99.6	100	237	k__Fungi	p__Basidiomycota	c__Exobasidiomycetes	o__Exobasidiales	f__Exobasidiales_fam_Incertae_sedis	g__Guomyces	s__Guomyces_nicotianae
OTU010	MOSTABUND|n=2134/1006	724	405	1005	MT813950	SH0950131.10FU	4.78626e-071	270.731	146	1	156	217	371	153	153	98.1	98.1	159	k__Fungi	p__Ascomycota	c__Xylonomycetes	o__Symbiotaphrinales	f__Symbiotaphrinaceae	g__Symbiotaphrina	s__Symbiotaphrina_microtheca
OTU011	MOSTABUND|n=1467/430	498	229	740	UDB03608770	SH1012176.10FU	5.48785e-070	267.038	144	1	144	317	460	144	144	100	100	144	k__Fungi	p__Ascomycota	c__Leotiomycetes	o__Helotiales	f__Helotiales_fam_Incertae_sedis	g__Infundichalara	s__Infundichalara_sp
OTU012	MOSTABUND|n=1386/651	461	258	667	MT872624	SH0912804.10FU	4.53245e-071	270.731	146	1	152	578	729	150	150	98.7	100	152	k__Fungi	p__Ascomycota	c__Eurotiomycetes	o__Eurotiomycetes_ord_Incertae_sedis	f__Eurotiomycetes_fam_Incertae_sedis	g__Eurotiomycetes_gen_Incertae_sedis	s__Eurotiomycetes_sp
OTU013	MOSTABUND|n=1183/171	434	231	518	GU062229	SH0926075.10FU	7.69423e-131	470.169	254	1	254	308	561	254	254	100	98.4	258	k__Fungi	p__Basidiomycota	c__Basidiomycota_cls_Incertae_sedis	o__Basidiomycota_ord_Incertae_sedis	f__Basidiomycota_fam_Incertae_sedis	g__Basidiomycota_gen_Incertae_sedis	s__Basidiomycota_sp
OTU014	MOSTABUND|n=1098/233	379	230	489	OR387067	SH0974819.10FU	3.0608e-109	398.15	215	1	219	363	580	218	218	99.5	100	219	k__Fungi	p__Ascomycota	c__Eurotiomycetes	o__Chaetothyriales	f__Herpotrichiellaceae	g__Exophiala	s__Exophiala_dermatitidis
OTU015	MOSTABUND|n=1092/537	412	259	421	KT265804	SH0733984.10FU	1.95814e-116	422.156	228	1	232	883	1113	231	231	99.6	99.1	234	k__Fungi	p__Basidiomycota	c__Microbotryomycetes	o__Sporidiobolales	f__Sporidiobolaceae	g__Rhodotorula	s__Rhodotorula_sp
OTU016	MOSTABUND|n=1091/652	269	325	497															k_	p_	c_	o_	f_	g_	s_
OTU017	MOSTABUND|n=943/536	391	161	391	OR793058	SH0767731.10FU	7.95641e-079	296.584	160	1	160	362	521	160	160	100	100	160	k__Fungi	p__Ascomycota	c__Eurotiomycetes	o__Eurotiales	f__Aspergillaceae	g__Penicillium	s__Penicillium_fundyense
OTU018	MOSTABUND|n=846/502	316	144	386	OQ383503	SH0966706.10FU	9.50805e-073	276.271	149	1	149	312	460	149	149	100	100	149	k__Fungi	p__Ascomycota	c__Leotiomycetes	o__Leotiales	f__Tympanidaceae	g__Pragmopora	s__Pragmopora_sp
OTU019	MOSTABUND|n=584/196	141	75	368	MT809296	SH0737869.10FU	2.09388e-074	281.811	152	1	152	352	503	152	152	100	100	152	k__Fungi	p__Ascomycota	c__Sareomycetes	o__Sareales	f__Sareaceae	g__Sarea	s__Sarea_sp
OTU020	MOSTABUND|n=584/336	191	140	253	OM337573	SH0849718.10FU	1.77406e-075	285.504	154	1	164	538	700	161	161	98.2	100	164	k__Fungi	p__Ascomycota	c__Dothideomycetes	o__Mytilinidiales	f__Mytilinidiaceae	g__Mytilinidion	s__Mytilinidion_resinicola
OTU021	MOSTABUND|n=545/281	203	118	224	MK782435	SH0905449.10FU	1.3717e-081	305.817	165	1	165	771	935	165	165	100	100	165	k__Fungi	p__Ascomycota	c__Leotiomycetes	o__Helotiales	f__Mollisiaceae	g__Phialocephala	s__Phialocephala_fluminis
OTU022	MOSTABUND|n=524/181	279	68	177	OM337540	SH0924980.10FU	2.77361e-073	278.118	150	1	153	470	622	152	152	99.3	98.7	155	k__Fungi	p__Ascomycota	c__Dothideomycetes	o__Mytilinidiales	f__Mytilinidiaceae	g__Lophium	s__Lophium_mytilinum
OTU023	MOSTABUND|n=493/315	156	92	245	EF434047	SH0868844.10FU	1.05174e-067	259.651	140	1	161	433	593	154	154	95.7	100	161	k__Fungi	p__Ascomycota	c__Dothideomycetes	o__Dothideomycetes_ord_Incertae_sedis	f__Dothideomycetes_fam_Incertae_sedis	g__Dothideomycetes_gen_Incertae_sedis	s__Dothideomycetes_sp
OTU024	MOSTABUND|n=388/250	25	17	346	OP856539	SH0970687.10FU	3.60778e-058	228.258	123	1	173	361	535	158	158	91.3	91.1	190	k__Fungi	p__Ascomycota	c__Sordariomycetes	o__Microascales	f__Microascaceae	g__Scedosporium	s__Scedosporium_sp
OTU025	MOSTABUND|n=379/218	235	49	95	OM980413	SH0862656.10FU	4.60542e-017	91.6061	49	36	137	382	485	88	88	86.3	57	179	k__Fungi	p__Basidiomycota	c__Microbotryomycetes	o__Microbotryomycetes_ord_Incertae_sedis	f__Microbotryomycetes_fam_Incertae_sedis	g__Yunzhangia	s__Yunzhangia_sp
OTU026	MOSTABUND|n=305/160	138	56	111	OQ718080	SH0738016.10FU	1.27027e-071	272.578	147	1	153	373	525	151	151	98.7	100	153	k__Fungi	p__Ascomycota	c__Sareomycetes	o__Sareales	f__Sareaceae	g__Sarea	s__Sarea_coeloplata
OTU027	MOSTABUND|n=288/174	70	93	125	UDB02025080	SH0950063.10FU	3.25834e-052	207.945	112	1	130	309	439	125	125	96.2	92.9	140	k__Fungi	p__Ascomycota	c__Dothideomycetes	o__Mycosphaerellales	f__Neodevriesiaceae	g__Neodevriesiaceae_gen_Incertae_sedis	s__Neodevriesiaceae_sp
OTU028	MOSTABUND|n=266/113	94	49	123	LC639279	SH0946103.10FU	8.86916e-068	259.651	140	1	140	370	509	140	140	100	100	140	k__Fungi	p__Ascomycota	c__Leotiomycetes	o__Helotiales	f__Myxotrichaceae	g__Oidiodendron	s__Oidiodendron_griseum
OTU029	MOSTABUND|n=258/119	112	49	97	OR752067	SH0940075.10FU	1.3717e-081	305.817	165	1	165	364	528	165	165	100	100	165	k__Fungi	p__Ascomycota	c__Eurotiomycetes	o__Eurotiales	f__Aspergillaceae	g__Aspergillus	s__Aspergillus_fumigatus
OTU030	MOSTABUND|n=253/132	64	41	148	LC646545	SH0946018.10FU	8.86916e-068	259.651	140	1	140	344	483	140	140	100	100	140	k__Fungi	p__Ascomycota	c__Leotiomycetes	o__Helotiales	f__Amorphothecaceae	g__Amorphotheca	s__Amorphotheca_resinae
OTU031	MOSTABUND|n=228/120	59	82	87	LC272919	SH0915560.10FU	1.76057e-070	268.884	145	1	162	362	525	158	158	97.5	100	162	k__Fungi	p__Ascomycota	c__Dothideomycetes	o__Myriangiales	f__Myriangiales_fam_Incertae_sedis	g__Myriangiales_gen_Incertae_sedis	s__Myriangiales_sp
OTU032	MOSTABUND|n=217/113	76	49	92	UDB01441599	SH0878054.10FU	1.07576e-082	309.511	167	1	167	343	509	167	167	100	100	167	k__Fungi	p__Ascomycota	c__Eurotiomycetes	o__Eurotiales	f__Aspergillaceae	g__Aspergillus	s__Aspergillus_sp
OTU033	MOSTABUND|n=216/122	67	61	88	KY105956	SH0892770.10FU	4.27798e-092	340.904	184	1	184	467	650	184	184	100	100	184	k__Fungi	p__Ascomycota	c__Saccharomycetes	o__Saccharomycetales	f__Debaryomycetaceae	g__Yamadazyma	s__Yamadazyma_tumulicola
OTU034	MOSTABUND|n=196/83	69	46	81	PP034030	SH0940222.10FU	1.07576e-082	309.511	167	1	167	250	416	167	167	100	100	167	k__Fungi	p__Ascomycota	c__Eurotiomycetes	o__Eurotiales	f__Aspergillaceae	g__Penicillium	s__Penicillium_roseopurpureum
OTU035	MOSTABUND|n=193/74	78	35	80	KU580845	SH1015287.10FU	2.55325e-068	261.498	141	1	144	358	502	144	144	100	100	144	k__Fungi	p__Fungi_phy_Incertae_sedis	c__Fungi_cls_Incertae_sedis	o__Fungi_ord_Incertae_sedis	f__Fungi_fam_Incertae_sedis	g__Fungi_gen_Incertae_sedis	s__Fungi_sp
OTU036	MOSTABUND|n=172/83	55	33	84	MZ314474	SH0743871.10FU	2.84012e-078	294.738	159	1	159	256	414	159	159	100	100	159	k__Fungi	p__Basidiomycota	c__Tremellomycetes	o__Tremellales	f__Naemateliaceae	g__Naematelia	s__Naematelia_encephala
OTU037	MOSTABUND|n=172/63	61	38	73	UDB01965427	SH0904668.10FU	9.33834e-074	279.964	151	1	182	350	530	173	173	95.1	100	182	k__Fungi	p__Ascomycota	c__Eurotiomycetes	o__Chaetothyriales	f__Herpotrichiellaceae	g__Exophiala	s__Exophiala_sp
OTU038	MOSTABUND|n=161/92	71	25	65															k_	p_	c_	o_	f_	g_	s_
OTU039	MOSTABUND|n=154/29	23	19	112	UDB05269281	SH0868848.10FU	1.40152e-081	305.817	165	1	168	393	560	167	167	99.4	100	168	k__Fungi	p__Ascomycota	c__Dothideomycetes	o__Dothideomycetes_ord_Incertae_sedis	f__Dothideomycetes_fam_Incertae_sedis	g__Dothideomycetes_gen_Incertae_sedis	s__Dothideomycetes_sp
OTU040	MOSTABUND|n=148/72	46	30	72	HG937089	SH0964646.10FU	1.36369e-092	342.75	185	1	207	363	567	200	200	96.6	100	207	k__Fungi	p__Basidiomycota	c__Basidiomycota_cls_Incertae_sedis	o__Basidiomycota_ord_Incertae_sedis	f__Basidiomycota_fam_Incertae_sedis	g__Basidiomycota_gen_Incertae_sedis	s__Basidiomycota_sp
OTU041	MOSTABUND|n=147/94	51	30	66															k_	p_	c_	o_	f_	g_	s_
OTU042	MOSTABUND|n=135/71	53	30	52	MH864711	SH0821638.10FU	2.09388e-074	281.811	152	1	152	414	565	152	152	100	100	152	k__Fungi	p__Ascomycota	c__Dothideomycetes	o__Pleosporales	f__Phaeosphaeriaceae	g__Paraphoma	s__Paraphoma_fimeti
OTU043	MOSTABUND|n=121/60	54	18	49	OR091314	SH0801460.10FU	2.22881e-079	298.431	161	1	161	347	507	161	161	100	100	161	k__Fungi	p__Ascomycota	c__Eurotiomycetes	o__Phaeomoniellales	f__Celotheliaceae	g__Phaeomoniella	s__Phaeomoniella_sp
OTU044	MOSTABUND|n=115/80	35	18	62	UDB03126426	SH0966817.10FU	2.01308e-049	198.712	107	1	143	327	469	132	132	92.3	100	143	k__Fungi	p__Ascomycota	c__Leotiomycetes	o__Leotiales	f__Tympanidaceae	g__Claussenomyces	s__Claussenomyces_sp
OTU045	MOSTABUND|n=114/45	37	28	49	KC785575	SH0934675.10FU	2.87382e-104	381.53	206	1	206	348	553	206	206	100	100	206	k__Fungi	p__Basidiomycota	c__Exobasidiomycetes	o__Exobasidiales	f__Exobasidiaceae	g__Exobasidiaceae_gen_Incertae_sedis	s__Exobasidiaceae_sp
OTU046	MOSTABUND|n=108/53	45	14	49	PP151174	SH0962330.10FU	3.39167e-072	274.424	148	1	148	359	506	148	148	100	100	148	k__Fungi	p__Ascomycota	c__Dothideomycetes	o__Cladosporiales	f__Cladosporiaceae	g__Cladosporium	s__Cladosporium_cladosporioides
OTU047	MOSTABUND|n=107/74	35	25	47	LC015666	SH0960444.10FU	1.52938e-050	202.405	109	1	141	341	483	132	132	93.6	100	141	k__Fungi	p__Ascomycota	c__Lecanoromycetes	o__Lecanoromycetes_ord_Incertae_sedis	f__Lecanoromycetes_fam_Incertae_sedis	g__Lecanoromycetes_gen_Incertae_sedis	s__Lecanoromycetes_sp
OTU048	MOSTABUND|n=104/2	34	17	53	UDB03609281	SH1012176.10FU	2.55325e-068	261.498	141	1	144	317	460	143	143	99.3	100	144	k__Fungi	p__Ascomycota	c__Leotiomycetes	o__Helotiales	f__Helotiales_fam_Incertae_sedis	g__Infundichalara	s__Infundichalara_sp
OTU049	MOSTABUND|n=102/31	43	14	45	MH864788	SH0885672.10FU	6.97619e-090	333.517	180	1	180	357	536	180	180	100	100	180	k__Fungi	p__Ascomycota	c__Eurotiomycetes	o__Chaetothyriales	f__Herpotrichiellaceae	g__Rhinocladiella	s__Rhinocladiella_atrovirens
OTU050	MOSTABUND|n=102/41	31	14	57	OU953798	SH1012135.10FU	1.53887e-070	268.884	145	1	145	317	461	145	145	100	100	145	k__Fungi	p__Ascomycota	c__Leotiomycetes	o__Helotiales	f__Hyaloscyphaceae	g__Hyaloscyphaceae_gen_Incertae_sedis	s__Hyaloscyphaceae_sp
OTU051	MOSTABUND|n=98/55	37	12	49															k_	p_	c_	o_	f_	g_	s_
OTU052	MOSTABUND|n=97/32	34	21	42	MZ133732	SH0875505.10FU	2.96467e-053	211.638	114	1	160	421	584	148	148	92.5	100	160	k__Fungi	p__Ascomycota	c__Eurotiomycetes	o__Onygenales	f__Gymnoascaceae	g__Gymnoascus	s__Gymnoascus_halophilus
OTU053	MOSTABUND|n=91/26	31	24	36	OR531385	SH0986908.10FU	1.85127e-085	318.744	172	1	172	390	561	172	172	100	100	172	k__Fungi	p__Ascomycota	c__Eurotiomycetes	o__Chaetothyriales	f__Herpotrichiellaceae	g__Exophiala	s__Exophiala_xenobiotica
OTU054	MOSTABUND|n=76/28	31	13	32	UDB02013834	SH0904555.10FU	2.19599e-085	318.744	172	1	196	361	557	189	189	96.4	98.5	199	k__Fungi	p__Ascomycota	c__Eurotiomycetes	o__Chaetothyriales	f__Herpotrichiellaceae	g__Exophiala	s__Exophiala_sp
OTU055	MOSTABUND|n=76/47	2	21	53	LS998796	SH1015806.10FU	8.18478e-059	230.105	124	1	160	335	495	152	152	95	100	160	k__Fungi	p__Ascomycota	c__Dothideomycetes	o__Venturiales	f__Cylindrosympodiaceae	g__Septonema	s__Septonema_sp
OTU056	MOSTABUND|n=74/42	29	12	33	KX822546	SH0986077.10FU	3.16379e-028	128.539	69	1	129	391	514	112	112	86.8	78.7	164	k__Fungi	p__Ascomycota	c__Eurotiomycetes	o__Chaetothyriales	f__Chaetothyriales_fam_Incertae_sedis	g__Chaetothyriales_gen_Incertae_sedis	s__Chaetothyriales_sp
OTU057	MOSTABUND|n=73/38	5	12	56	AM901832	SH0934681.10FU	4.12437e-108	394.457	213	1	227	539	762	223	223	98.2	100	227	k__Fungi	p__Basidiomycota	c__Exobasidiomycetes	o__Exobasidiales	f__Exobasidiaceae	g__Exobasidium	s__Exobasidium_sp
OTU058	MOSTABUND|n=70/33	22	12	36	UDB05377383	SH0949870.10FU	6.80457e-116	420.31	227	1	227	298	524	227	227	100	100	227	k__Fungi	p__Basidiomycota	c__Cystobasidiomycetes	o__Erythrobasidiales	f__Erythrobasidiales_fam_Incertae_sedis	g__Erythrobasidiales_gen_Incertae_sedis	s__Erythrobasidiales_sp
OTU059	MOSTABUND|n=70/33	14	9	47	UDB02000288	SH0944003.10FU	1.08119e-043	180.245	97	1	132	346	479	123	123	93.2	66.3	199	k__Fungi	p__Ascomycota	c__Eurotiomycetes	o__Chaetothyriales	f__Herpotrichiellaceae	g__Exophiala	s__Exophiala_sp
OTU060	MOSTABUND|n=64/22	6	6	52	OK335192	SH0888269.10FU	1.85127e-085	318.744	172	1	172	350	521	172	172	100	100	172	k__Fungi	p__Ascomycota	c__Eurotiomycetes	o__Eurotiales	f__Aspergillaceae	g__Aspergillus	s__Aspergillus_sp
OTU061	MOSTABUND|n=64/31	24	13	27	UDB06550829	SH0946271.10FU	2.24642e-105	385.223	208	1	208	332	539	208	208	100	100	208	k__Fungi	p__Basidiomycota	c__Microbotryomycetes	o__Sporidiobolales	f__Sporidiobolaceae	g__Rhodotorula	s__Rhodotorula_sp
OTU062	MOSTABUND|n=53/27	20	7	26	OX346372	SH0763677.10FU	7.34168e-069	263.345	142	1	148	318	465	146	146	98.6	100	148	k__Fungi	p__Ascomycota	c__Dothideomycetes	o__Mycosphaerellales	f__Neodevriesiaceae	g__Neodevriesia	s__Neodevriesia_fraserae
OTU063	MOSTABUND|n=52/22	13	15	24	KT264384	SH0904651.10FU	7.62267e-085	316.897	171	1	193	387	578	186	186	96.4	100	193	k__Fungi	p__Ascomycota	c__Eurotiomycetes	o__Chaetothyriales	f__Herpotrichiellaceae	g__Exophiala	s__Exophiala_sp
OTU064	MOSTABUND|n=48/19	14	8	26	UDB01990490	SH0976639.10FU	8.79133e-084	313.204	169	1	175	356	530	173	173	98.9	100	175	k__Fungi	p__Ascomycota	c__Eurotiomycetes	o__Chaetothyriales	f__Herpotrichiellaceae	g__Exophiala	s__Exophiala_sp
OTU065	MOSTABUND|n=46/27	19	8	19	KM104110	SH0967380.10FU	2.15769e-064	248.571	134	1	154	366	521	149	149	96.8	100	154	k__Fungi	p__Fungi_phy_Incertae_sedis	c__Fungi_cls_Incertae_sedis	o__Fungi_ord_Incertae_sedis	f__Fungi_fam_Incertae_sedis	g__Fungi_gen_Incertae_sedis	s__Fungi_sp
OTU066	MOSTABUND|n=41/23	16	12	13	UDB05349834	SH0867021.10FU	1.41853e-032	143.312	77	18	193	302	478	147	147	83.5	88.4	199	k__Fungi	p__Basidiomycota	c__Pucciniomycetes	o__Platygloeales	f__Eocronartiaceae	g__Eocronartium	s__Eocronartium_sp
OTU067	MOSTABUND|n=41/8	15	6	20															k_	p_	c_	o_	f_	g_	s_
OTU068	MOSTABUND|n=40/18	9	7	24	OR898185	SH0815720.10FU	1.72241e-096	355.677	192	1	204	454	658	201	201	98.5	100	204	k__Fungi	p__Basidiomycota	c__Agaricomycetes	o__Agaricales	f__Pleurotaceae	g__Hohenbuehelia	s__Hohenbuehelia_grisea
OTU069	MOSTABUND|n=40/19	20	4	16	MZ573462	SH0735889.10FU	5.18273e-086	320.591	173	1	173	446	618	173	173	100	100	173	k__Fungi	p__Ascomycota	c__Dothideomycetes	o__Venturiales	f__Sympoventuriaceae	g__Ochroconis	s__Ochroconis_sp
OTU070	MOSTABUND|n=36/20	12	15	9	OU989284	SH0843807.10FU	7.47067e-074	279.964	151	1	151	351	501	151	151	100	100	151	k__Fungi	p__Ascomycota	c__Saccharomycetes	o__Saccharomycetales	f__Trichomonascaceae	g__Blastobotrys	s__Blastobotrys_arbuscula
OTU071	MOSTABUND|n=36/20	12	12	12	LT548263	SH0734002.10FU	3.39464e-089	331.671	179	1	234	342	580	220	220	94	100	234	k__Fungi	p__Basidiomycota	c__Microbotryomycetes	o__Microbotryomycetes_ord_Incertae_sedis	f__Colacogloeaceae	g__Colacogloea	s__Colacogloea_sp
OTU072	MOSTABUND|n=31/6	10	4	17	OR091312	SH0974820.10FU	5.86302e-081	303.971	164	1	191	369	559	183	183	95.8	100	191	k__Fungi	p__Ascomycota	c__Eurotiomycetes	o__Chaetothyriales	f__Herpotrichiellaceae	g__Capronia	s__Capronia_sp
OTU073	MOSTABUND|n=30/5	15	3	12	KF360373	SH0737941.10FU	1.7063e-060	235.645	127	1	139	317	455	135	135	97.1	89.1	156	k__Fungi	p__Ascomycota	c__Lecanoromycetes	o__Umbilicariales	f__Elixiaceae	g__Elixia	s__Elixia_flexella
OTU074	MOSTABUND|n=30/11	13	7	10	UDB01571240	SH0947752.10FU	1.71027e-101	372.297	201	1	204	297	500	203	203	99.5	100	204	k__Fungi	p__Basidiomycota	c__Cystobasidiomycetes	o__Buckleyzymales	f__Buckleyzymaceae	g__Buckleyzyma	s__Buckleyzyma_sp
OTU075	MOSTABUND|n=25/11	7	3	15	HQ211632	SH0934667.10FU	3.60198e-093	344.597	186	1	198	373	570	194	194	98	100	198	k__Fungi	p__Basidiomycota	c__Exobasidiomycetes	o__Exobasidiales	f__Exobasidiaceae	g__Exobasidiaceae_gen_Incertae_sedis	s__Exobasidiaceae_sp
OTU076	MOSTABUND|n=25/12	9	8	8															k_	p_	c_	o_	f_	g_	s_
OTU077	MOSTABUND|n=23/13	6	1	16	OR762723	SH0862152.10FU	1.64456e-075	285.504	154	1	154	320	473	154	154	100	100	154	k__Fungi	p__Ascomycota	c__Dothideomycetes	o__Pleosporales	f__Didymellaceae	g__Epicoccum	s__Epicoccum_nigrum
OTU078	MOSTABUND|n=23/15	9	4	10	OR803396	SH0939434.10FU	7.95641e-079	296.584	160	1	160	362	521	160	160	100	100	160	k__Fungi	p__Ascomycota	c__Eurotiomycetes	o__Eurotiales	f__Aspergillaceae	g__Penicillium	s__Penicillium_sp
OTU079	MOSTABUND|n=22/8	13	2	7	KU580076	SH0959039.10FU	2.84012e-078	294.738	159	1	159	355	513	159	159	100	100	159	k__Fungi	p__Ascomycota	c__Dothideomycetes	o__Capnodiales	f__Capnodiales_fam_Incertae_sedis	g__Capnodiales_gen_Incertae_sedis	s__Capnodiales_sp
OTU080	MOSTABUND|n=21/10	4	2	15	UDB0525539	SH0924986.10FU	6.00805e-075	283.658	153	1	156	328	483	155	155	99.4	100	156	k__Fungi	p__Ascomycota	c__Dothideomycetes	o__Mytilinidiales	f__Mytilinidiaceae	g__Lophium	s__Lophium_sp
OTU081	MOSTABUND|n=20/1	13	7	0	UDB03610486	SH1012176.10FU	2.55325e-068	261.498	141	1	144	317	460	143	143	99.3	100	144	k__Fungi	p__Ascomycota	c__Leotiomycetes	o__Helotiales	f__Helotiales_fam_Incertae_sedis	g__Infundichalara	s__Infundichalara_sp
OTU082	MOSTABUND|n=20/1	8	2	10	UDB03609281	SH1012176.10FU	2.55325e-068	261.498	141	1	144	317	460	143	143	99.3	100	144	k__Fungi	p__Ascomycota	c__Leotiomycetes	o__Helotiales	f__Helotiales_fam_Incertae_sedis	g__Infundichalara	s__Infundichalara_sp
OTU083	MOSTABUND|n=20/13	9	5	6	OR623240	SH0841251.10FU	1.00024e-098	363.064	196	1	199	263	462	199	199	100	100	199	k__Fungi	p__Basidiomycota	c__Agaricostilbomycetes	o__Agaricostilbales	f__Chionosphaeraceae	g__Kurtzmanomyces	s__Kurtzmanomyces_sp
OTU084	MOSTABUND|n=20/10	10	3	7															k_	p_	c_	o_	f_	g_	s_
OTU085	MOSTABUND|n=19/11	4	4	11	MW710662	SH0915545.10FU	5.18273e-086	320.591	173	1	173	331	503	173	173	100	100	173	k__Fungi	p__Ascomycota	c__Dothideomycetes	o__Dothideales	f__Zalariaceae	g__Zalaria	s__Zalaria_alba
OTU086	MOSTABUND|n=18/6	2	7	9															k_	p_	c_	o_	f_	g_	s_
OTU087	MOSTABUND|n=18/6	9	4	5	MK801314	SH0950131.10FU	1.01375e-077	292.891	158	1	158	392	549	158	158	100	100	158	k__Fungi	p__Ascomycota	c__Xylonomycetes	o__Symbiotaphrinales	f__Symbiotaphrinaceae	g__Symbiotaphrina	s__Symbiotaphrina_microtheca
OTU088	MOSTABUND|n=17/8	7	3	7	UDB04160857	SH0939704.10FU	2.84012e-078	294.738	159	1	159	336	494	159	159	100	100	159	k__Fungi	p__Ascomycota	c__Eurotiomycetes	o__Eurotiales	f__Aspergillaceae	g__Penicillium	s__Penicillium_sp
OTU089	MOSTABUND|n=17/5	12	3	2	OR752061	SH0939958.10FU	3.84148e-082	307.664	166	1	166	365	530	166	166	100	100	166	k__Fungi	p__Ascomycota	c__Eurotiomycetes	o__Eurotiales	f__Aspergillaceae	g__Aspergillus	s__Aspergillus_tubingensis
OTU090	MOSTABUND|n=16/10	11	1	4															k_	p_	c_	o_	f_	g_	s_
OTU091	MOSTABUND|n=16/2	7	5	4	MK050392	SH0964633.10FU	1.39312e-057	226.412	122	1	184	2085	2270	167	167	90.8	91.1	202	k__Fungi	p__Basidiomycota	c__Cystobasidiomycetes	o__Cystobasidiales	f__Cystobasidiales_fam_Incertae_sedis	g__Robertozyma	s__Robertozyma_ningxiaensis
OTU092	MOSTABUND|n=16/13	9	2	5															k_	p_	c_	o_	f_	g_	s_
OTU093	MOSTABUND|n=15/7	4	3	8	GQ169320	SH0973416.10FU	2.36174e-084	315.051	170	1	170	347	516	170	170	100	100	170	k__Fungi	p__Ascomycota	c__Eurotiomycetes	o__Eurotiales	f__Trichocomaceae	g__Sagenomella	s__Sagenomella_griseoviridis
OTU094	MOSTABUND|n=15/12	6	1	8	FM173097	SH0974823.10FU	7.48491e-085	316.897	171	1	189	359	548	184	184	97.4	99.5	190	k__Fungi	p__Ascomycota	c__Eurotiomycetes	o__Chaetothyriales	f__Herpotrichiellaceae	g__Exophiala	s__Exophiala_sp
OTU095	MOSTABUND|n=15/4	5	3	7	UDB01624955	SH0976701.10FU	5.67491e-091	337.211	182	1	188	353	540	186	186	98.9	100	188	k__Fungi	p__Ascomycota	c__Eurotiomycetes	o__Chaetothyriales	f__Herpotrichiellaceae	g__Capronia	s__Capronia_sp
OTU096	MOSTABUND|n=14/1	0	4	10	KJ522801	SH0904731.10FU	1.28793e-092	342.75	185	1	197	365	562	194	194	98.5	100	197	k__Fungi	p__Ascomycota	c__Eurotiomycetes	o__Chaetothyriales	f__Herpotrichiellaceae	g__Exophiala	s__Exophiala_heteromorpha
OTU097	MOSTABUND|n=14/12	6	1	7															k_	p_	c_	o_	f_	g_	s_
OTU098	MOSTABUND|n=14/6	0	12	2	OQ717810	SH0843146.10FU	6.09834e-066	254.111	137	1	172	466	634	162	162	94.2	88.7	194	k__Fungi	p__Ascomycota	c__Eurotiomycetes	o__Mycocaliciales	f__Mycocaliciaceae	g__Chaenothecopsis	s__Chaenothecopsis_sp
OTU099	MOSTABUND|n=14/7	4	7	3	OW985768	SH0960075.10FU	1.29135e-076	289.198	156	1	156	362	517	156	156	100	100	156	k__Fungi	p__Ascomycota	c__Dothideomycetes	o__Pleosporales	f__Coniothyriaceae	g__Ochrocladosporium	s__Ochrocladosporium_elatum
OTU100	MOSTABUND|n=13/6	6	1	6	UDB02747428	SH0960493.10FU	1.93347e-059	231.952	125	1	140	295	434	135	135	96.4	100	140	k__Fungi	p__Ascomycota	c__Eurotiomycetes	o__Eurotiomycetes_ord_Incertae_sedis	f__Eurotiomycetes_fam_Incertae_sedis	g__Eurotiomycetes_gen_Incertae_sedis	s__Eurotiomycetes_sp
OTU101	MOSTABUND|n=12/8	5	3	4	UDB019754	SH0885763.10FU	3.51384e-098	361.217	195	1	195	372	566	195	195	100	100	195	k__Fungi	p__Basidiomycota	c__Exobasidiomycetes	o__Exobasidiales	f__Brachybasidiaceae	g__Meira	s__Meira_sp
OTU102	MOSTABUND|n=12/8	5	3	4	KF780603	SH0838052.10FU	3.61826e-077	291.044	157	1	157	306	462	157	157	100	100	157	k__Fungi	p__Ascomycota	c__Sordariomycetes	o__Hypocreales	f__Hypocreales_fam_Incertae_sedis	g__Hypocreales_gen_Incertae_sedis	s__Hypocreales_sp
OTU103	MOSTABUND|n=11/6	1	7	3															k_	p_	c_	o_	f_	g_	s_
OTU104	MOSTABUND|n=10/5	4	2	4															k_	p_	c_	o_	f_	g_	s_
OTU105	MOSTABUND|n=10/4	1	4	5	KF274298	SH1027636.10FU	3.44208e-023	111.919	60	1	63	418	480	62	62	98.4	36	175	k__Fungi	p__Fungi_phy_Incertae_sedis	c__Fungi_cls_Incertae_sedis	o__Fungi_ord_Incertae_sedis	f__Fungi_fam_Incertae_sedis	g__Fungi_gen_Incertae_sedis	s__Fungi_sp
OTU106	MOSTABUND|n=10/5	3	4	3	LC643135	SH0878054.10FU	3.01238e-083	311.357	168	1	168	384	551	168	168	100	100	168	k__Fungi	p__Ascomycota	c__Eurotiomycetes	o__Eurotiales	f__Aspergillaceae	g__Aspergillus	s__Aspergillus_conicus
OTU107	MOSTABUND|n=10/5	3	3	4	HQ611336	SH0846888.10FU	3.39167e-072	274.424	148	1	148	296	443	148	148	100	100	148	k__Fungi	p__Mortierellomycota	c__Mortierellomycetes	o__Mortierellales	f__Mortierellales_fam_Incertae_sedis	g__Mortierellales_gen_Incertae_sedis	s__Mortierellales_sp
OTU108	MOSTABUND|n=10/6	4	2	4	DQ870625	SH0880564.10FU	5.51045e-122	440.623	238	1	238	356	593	238	238	100	100	238	k__Fungi	p__Basidiomycota	c__Microbotryomycetes	o__Microbotryomycetes_ord_Incertae_sedis	f__Colacogloeaceae	g__Colacogloea	s__Colacogloea_subericola
OTU109	MOSTABUND|n=10/6	2	3	5															k_	p_	c_	o_	f_	g_	s_
OTU110	MOSTABUND|n=10/2	2	0	8	MG707511	SH0974827.10FU	3.04486e-109	398.15	215	1	218	429	646	217	217	99.5	100	218	k__Fungi	p__Ascomycota	c__Eurotiomycetes	o__Chaetothyriales	f__Herpotrichiellaceae	g__Herpotrichiellaceae_gen_Incertae_sedis	s__Herpotrichiellaceae_sp
OTU111	MOSTABUND|n=10/2	4	2	4	MK212381	SH0763728.10FU	2.09388e-074	281.811	152	1	152	390	541	152	152	100	100	152	k__Fungi	p__Ascomycota	c__Ascomycota_cls_Incertae_sedis	o__Ascomycota_ord_Incertae_sedis	f__Ascomycota_fam_Incertae_sedis	g__Ascomycota_gen_Incertae_sedis	s__Ascomycota_sp
OTU112	MOSTABUND|n=9/2	3	2	4	DQ870625	SH0880564.10FU	1.29849e-058	230.105	124	1	238	356	593	206	206	86.6	100	238	k__Fungi	p__Basidiomycota	c__Microbotryomycetes	o__Microbotryomycetes_ord_Incertae_sedis	f__Colacogloeaceae	g__Colacogloea	s__Colacogloea_subericola
OTU113	MOSTABUND|n=9/1	4	3	2	GU062229	SH0926075.10FU	1.65268e-117	425.85	230	1	249	308	561	247	247	99.2	98.4	253	k__Fungi	p__Basidiomycota	c__Basidiomycota_cls_Incertae_sedis	o__Basidiomycota_ord_Incertae_sedis	f__Basidiomycota_fam_Incertae_sedis	g__Basidiomycota_gen_Incertae_sedis	s__Basidiomycota_sp
OTU114	MOSTABUND|n=8/4	3	3	2	DQ494360	SH0965749.10FU	1.32138e-076	289.198	156	1	159	316	474	158	158	99.4	100	159	k__Fungi	p__Ascomycota	c__Orbiliomycetes	o__Orbiliales	f__Orbiliaceae	g__Dactylella	s__Dactylella_tenuis
OTU115	MOSTABUND|n=8/4	3	0	5	MK491201	SH0964639.10FU	5.9149e-096	353.83	191	1	196	255	450	194	194	99	100	196	k__Fungi	p__Basidiomycota	c__Cystobasidiomycetes	o__Cyphobasidiales	f__Cyphobasidiales_fam_Incertae_sedis	g__Cyphobasidiales_gen_Incertae_sedis	s__Cyphobasidiales_sp
OTU116	MOSTABUND|n=8/4	4	2	2	OP470251	SH0958692.10FU	1.68885e-045	185.785	100	1	152	242	397	138	138	90.8	100	152	k__Fungi	p__Basidiomycota	c__Tremellomycetes	o__Filobasidiales	f__Filobasidiaceae	g__Filobasidium	s__Filobasidium_sp
OTU117	MOSTABUND|n=8/4	3	0	5	OR810007	SH0939434.10FU	7.95641e-079	296.584	160	1	160	301	460	160	160	100	100	160	k__Fungi	p__Ascomycota	c__Eurotiomycetes	o__Eurotiales	f__Aspergillaceae	g__Penicillium	s__Penicillium_bialowiezense
OTU118	MOSTABUND|n=8/7	7	1	0	UDB01766759	SH1001257.10FU	7.65141e-074	279.964	151	1	154	333	486	153	153	99.4	100	154	k__Fungi	p__Ascomycota	c__Eurotiomycetes	o__Chaetothyriales	f__Chaetothyriales_fam_Incertae_sedis	g__Chaetothyriales_gen_Incertae_sedis	s__Chaetothyriales_sp
OTU119	MOSTABUND|n=8/2	0	0	8	AB597207	SH0924978.10FU	2.27871e-079	298.431	161	1	164	406	569	163	163	99.4	100	164	k__Fungi	p__Ascomycota	c__Dothideomycetes	o__Tubeufiales	f__Tubeufiaceae	g__Helicoma	s__Helicoma_isiola
OTU120	MOSTABUND|n=8/4	2	1	5	MK782305	SH0850121.10FU	1.33784e-051	206.098	111	1	156	323	490	151	151	96.8	100	156	k__Fungi	p__Ascomycota	c__Saccharomycetes	o__Saccharomycetales	f__Saccharomycetales_fam_Incertae_sedis	g__Saccharomycetales_gen_Incertae_sedis	s__Saccharomycetales_sp
OTU121	MOSTABUND|n=8/3	1	2	5	OQ694453	SH0899106.10FU	1.96687e-056	222.718	120	1	213	442	648	184	184	86.4	97.7	218	k__Fungi	p__Basidiomycota	c__Agaricostilbomycetes	o__Agaricostilbales	f__Chionosphaeraceae	g__Chionosphaera	s__Chionosphaera_cuniculicola
OTU122	MOSTABUND|n=8/4	5	0	3															k_	p_	c_	o_	f_	g_	s_
OTU123	MOSTABUND|n=7/3	3	2	2	OR623243	SH0958738.10FU	3.03363e-073	278.118	150	1	167	289	451	162	162	97	100	167	k__Fungi	p__Ascomycota	c__Saccharomycetes	o__Saccharomycetales	f__Trichomonascaceae	g__Blastobotrys	s__Blastobotrys_sp
OTU124	MOSTABUND|n=7/1	2	0	5	UDB05269281	SH0868848.10FU	6.56694e-075	283.658	153	1	168	393	560	163	163	97	100	168	k__Fungi	p__Ascomycota	c__Dothideomycetes	o__Dothideomycetes_ord_Incertae_sedis	f__Dothideomycetes_fam_Incertae_sedis	g__Dothideomycetes_gen_Incertae_sedis	s__Dothideomycetes_sp
OTU125	MOSTABUND|n=7/2	3	4	0	KF360374	SH0737973.10FU	6.04643e-065	250.418	135	1	143	317	459	140	140	97.9	92.3	155	k__Fungi	p__Ascomycota	c__Lecanoromycetes	o__Umbilicariales	f__Elixiaceae	g__Elixia	s__Elixia_sp
OTU126	MOSTABUND|n=7/4	4	2	1															k_	p_	c_	o_	f_	g_	s_
OTU127	MOSTABUND|n=7/3	1	0	6	KF360402	SH0737922.10FU	1.67984e-060	235.645	127	1	142	332	473	137	137	96.5	92.2	154	k__Fungi	p__Ascomycota	c__Lecanoromycetes	o__Umbilicariales	f__Umbilicariaceae	g__Fulgidea	s__Fulgidea_sierrae
OTU128	MOSTABUND|n=7/3	1	4	2															k_	p_	c_	o_	f_	g_	s_
OTU129	MOSTABUND|n=6/1	2	0	4	UDB03609281	SH1012176.10FU	2.55325e-068	261.498	141	1	144	317	460	143	143	99.3	100	144	k__Fungi	p__Ascomycota	c__Leotiomycetes	o__Helotiales	f__Helotiales_fam_Incertae_sedis	g__Infundichalara	s__Infundichalara_sp
OTU130	MOSTABUND|n=6/3	3	0	3															k_	p_	c_	o_	f_	g_	s_
OTU131	MOSTABUND|n=6/2	3	0	3	UDB0753669	SH0763728.10FU	5.86833e-075	283.658	153	1	153	322	474	153	153	100	100	153	k__Fungi	p__Fungi_phy_Incertae_sedis	c__Fungi_cls_Incertae_sedis	o__Fungi_ord_Incertae_sedis	f__Fungi_fam_Incertae_sedis	g__Fungi_gen_Incertae_sedis	s__Fungi_sp
OTU132	MOSTABUND|n=6/5	2	1	3	OQ690209	SH0964714.10FU	2.21854e-090	335.364	181	1	202	324	525	195	195	96.5	100	202	k__Fungi	p__Basidiomycota	c__Cystobasidiomycetes	o__Cystobasidiales	f__Cystobasidiaceae	g__Cystobasidium	s__Cystobasidium_calyptogenae
OTU133	MOSTABUND|n=6/2	0	3	3	KF274277	SH0881288.10FU	5.86833e-075	283.658	153	1	153	345	497	153	153	100	100	153	k__Fungi	p__Basidiomycota	c__Tremellomycetes	o__Tremellales	f__Tremellales_fam_Incertae_sedis	g__Tremellales_gen_Incertae_sedis	s__Tremellales_sp
OTU134	MOSTABUND|n=5/3	2	2	1	OQ448344	SH0964621.10FU	1.68128e-101	372.297	201	1	201	318	518	201	201	100	100	201	k__Fungi	p__Basidiomycota	c__Cystobasidiomycetes	o__Cystobasidiales	f__Cystobasidiaceae	g__Cystobasidium	s__Cystobasidium_laryngis
OTU135	MOSTABUND|n=5/3	0	1	4	UDB06553245	SH0965184.10FU	2.73027e-073	278.118	150	1	153	328	480	152	152	99.3	100	153	k__Fungi	p__Ascomycota	c__Sareomycetes	o__Sareales	f__Sareaceae	g__Sarea	s__Sarea_sp
OTU136	MOSTABUND|n=5/4	2	0	3	OR623240	SH0841251.10FU	6.17667e-086	320.591	173	1	201	263	462	193	193	96	100	201	k__Fungi	p__Basidiomycota	c__Agaricostilbomycetes	o__Agaricostilbales	f__Chionosphaeraceae	g__Kurtzmanomyces	s__Kurtzmanomyces_sp
OTU137	MOSTABUND|n=5/1	0	2	3	KJ706356	SH0946266.10FU	8.03493e-105	383.377	207	1	207	366	572	207	207	100	100	207	k__Fungi	p__Basidiomycota	c__Microbotryomycetes	o__Microbotryomycetes_ord_Incertae_sedis	f__Chrysozymaceae	g__Hamamotoa	s__Hamamotoa_singularis
OTU138	MOSTABUND|n=5/3	3	1	1	MK782308	SH0925502.10FU	7.22033e-069	263.345	142	1	146	758	902	145	145	99.3	100	146	k__Fungi	p__Ascomycota	c__Leotiomycetes	o__Helotiales	f__Helotiales_fam_Incertae_sedis	g__Helotiales_gen_Incertae_sedis	s__Helotiales_sp
OTU139	MOSTABUND|n=5/3	1	3	1	OR965240	SH0939544.10FU	6.24317e-080	300.278	162	1	162	346	507	162	162	100	100	162	k__Fungi	p__Ascomycota	c__Eurotiomycetes	o__Eurotiales	f__Aspergillaceae	g__Penicillium	s__Penicillium_sp
OTU140	MOSTABUND|n=4/2	3	0	1	OR769498	SH0925964.10FU	1.64456e-075	285.504	154	1	154	394	547	154	154	100	100	154	k__Fungi	p__Ascomycota	c__Dothideomycetes	o__Dothideales	f__Saccotheciaceae	g__Aureobasidium	s__Aureobasidium_pullulans
OTU141	MOSTABUND|n=4/1	1	1	2	OP941495	SH0953911.10FU	1.17219e-103	379.683	205	2	230	309	537	221	221	96.5	99.6	230	k__Fungi	p__Basidiomycota	c__Tremellomycetes	o__Filobasidiales	f__Piskurozymaceae	g__Solicoccozyma	s__Solicoccozyma_sp
OTU142	MOSTABUND|n=4/4	1	0	3	KF156038	SH0735104.10FU	1.0027e-088	329.824	178	1	178	447	624	178	178	100	90.4	197	k__Fungi	p__Ascomycota	c__Dothideomycetes	o__Venturiales	f__Sympoventuriaceae	g__Ochroconis	s__Ochroconis_longiphorum
OTU143	MOSTABUND|n=4/3	2	0	2															k_	p_	c_	o_	f_	g_	s_
OTU144	MOSTABUND|n=4/3	2	1	1															k_	p_	c_	o_	f_	g_	s_
OTU145	MOSTABUND|n=4/3	1	2	1	UDB03126426	SH0966817.10FU	9.10463e-068	259.651	140	1	143	327	469	142	142	99.3	100	143	k__Fungi	p__Ascomycota	c__Leotiomycetes	o__Leotiales	f__Tympanidaceae	g__Claussenomyces	s__Claussenomyces_sp
OTU146	MOSTABUND|n=4/1	1	0	3	UDB02020736	SH0843027.10FU	3.30284e-067	257.805	139	1	144	305	450	144	144	100	100	144	k__Fungi	p__Ascomycota	c__Dothideomycetes	o__Mycosphaerellales	f__Teratosphaeriaceae	g__Neocatenulostroma	s__Neocatenulostroma_sp
OTU147	MOSTABUND|n=4/1	0	0	4	KP018070	SH0847946.10FU	4.70145e-102	374.144	202	1	202	257	458	202	202	100	100	202	k__Fungi	p__Basidiomycota	c__Exobasidiomycetes	o__Exobasidiales	f__Brachybasidiaceae	g__Meira	s__Meira_sp
OTU148	MOSTABUND|n=4/1	1	1	2	UDB02013834	SH0904555.10FU	1.01576e-083	313.204	169	1	195	361	557	188	188	96.4	98.5	198	k__Fungi	p__Ascomycota	c__Eurotiomycetes	o__Chaetothyriales	f__Herpotrichiellaceae	g__Exophiala	s__Exophiala_sp
OTU149	MOSTABUND|n=4/2	2	0	2	UDB0681378	SH0950387.10FU	1.20978e-071	272.578	147	1	147	321	467	147	147	100	100	147	k__Fungi	p__Ascomycota	c__Leotiomycetes	o__Thelebolales	f__Pseudeurotiaceae	g__Pseudeurotium	s__Pseudeurotium_sp
OTU150	MOSTABUND|n=4/2	1	2	1	MF976761	SH0905231.10FU	2.83511e-063	244.878	132	1	156	398	554	149	149	95.5	100	156	k__Fungi	p__Fungi_phy_Incertae_sedis	c__Fungi_cls_Incertae_sedis	o__Fungi_ord_Incertae_sedis	f__Fungi_fam_Incertae_sedis	g__Fungi_gen_Incertae_sedis	s__Fungi_sp
OTU151	MOSTABUND|n=4/3	0	0	4	OR913034	SH0995683.10FU	6.24317e-080	300.278	162	1	162	373	534	162	162	100	100	162	k__Fungi	p__Ascomycota	c__Sordariomycetes	o__Xylariales	f__Graphostromataceae	g__Biscogniauxia	s__Biscogniauxia_mediterranea
OTU152	MOSTABUND|n=3/2	1	1	1															k_	p_	c_	o_	f_	g_	s_
OTU153	MOSTABUND|n=3/2	2	0	1	OQ526191	SH1020519.10FU	1.75527e-040	169.165	91	3	144	372	514	127	127	89.4	91	156	k__Fungi	p__Ascomycota	c__Dothideomycetes	o__Dothideomycetes_ord_Incertae_sedis	f__Dothideomycetes_fam_Incertae_sedis	g__Dothideomycetes_gen_Incertae_sedis	s__Dothideomycetes_sp
OTU154	MOSTABUND|n=3/1	2	1	0	KY102579	SH0733965.10FU	7.65077e-071	270.731	146	1	235	369	600	207	207	88.1	98.7	238	k__Fungi	p__Basidiomycota	c__Microbotryomycetes	o__Microbotryomycetes_ord_Incertae_sedis	f__Colacogloeaceae	g__Colacogloea	s__Colacogloea_terpenoidalis
OTU155	MOSTABUND|n=3/1	3	0	0	UDB07378601	SH0745575.10FU	1.19475e-093	346.444	187	1	231	387	619	218	218	94.4	100	231	k__Fungi	p__Chytridiomycota	c__Spizellomycetes	o__Spizellomycetales	f__Spizellomycetaceae	g__Spizellomycetaceae_gen_Incertae_sedis	s__Spizellomycetaceae_sp
OTU156	MOSTABUND|n=3/1	1	0	2	UDB07674985	SH1012176.10FU	2.55325e-068	261.498	141	1	144	315	458	143	143	99.3	100	144	k__Fungi	p__Ascomycota	c__Leotiomycetes	o__Helotiales	f__Pezizellaceae	g__Ciliolarina	s__Ciliolarina_sp
OTU157	MOSTABUND|n=3/2	1	0	2	UDB0952315	SH0992159.10FU	2.21577e-045	185.785	100	31	176	308	452	131	131	89.7	76.4	191	k__Fungi	p__Basidiomycota	c__Agaricostilbomycetes	o__Agaricostilbales	f__Agaricostilbales_fam_Incertae_sedis	g__Agaricostilbales_gen_Incertae_sedis	s__Agaricostilbales_sp
OTU158	MOSTABUND|n=3/2	1	2	0	OQ568166	SH0964631.10FU	4.70145e-102	374.144	202	1	202	272	473	202	202	100	100	202	k__Fungi	p__Basidiomycota	c__Cystobasidiomycetes	o__Cystobasidiales	f__Cystobasidiaceae	g__Cystobasidium	s__Cystobasidium_slooffiae
OTU159	MOSTABUND|n=3/1	0	2	1	UDB0995635	SH0856386.10FU	1.01375e-077	292.891	158	1	158	323	480	158	158	100	100	158	k__Fungi	p__Ascomycota	c__Dothideomycetes	o__Pleosporales	f__Pleosporaceae	g__Alternaria	s__Alternaria_sp
OTU160	MOSTABUND|n=3/1	0	2	1	UDB01788704	SH0944887.10FU	1.73449e-070	268.884	145	1	160	334	493	155	155	96.9	100	160	k__Fungi	p__Ascomycota	c__Eurotiomycetes	o__Chaetothyriales	f__Chaetothyriales_fam_Incertae_sedis	g__Chaetothyriales_gen_Incertae_sedis	s__Chaetothyriales_sp
OTU161	MOSTABUND|n=3/1	1	1	1	JN053509	SH0847499.10FU	2.11166e-096	355.677	192	1	235	343	576	223	223	94.9	96.3	244	k__Fungi	p__Basidiomycota	c__Tremellomycetes	o__Filobasidiales	f__Filobasidiaceae	g__Syzygospora	s__Syzygospora_alba
OTU162	MOSTABUND|n=3/2	1	1	1	LC317582	SH0976373.10FU	5.46342e-091	337.211	182	1	182	382	563	182	182	100	100	182	k__Fungi	p__Ascomycota	c__Eurotiomycetes	o__Chaetothyriales	f__Herpotrichiellaceae	g__Exophiala	s__Exophiala_angulospora
OTU163	MOSTABUND|n=3/2	0	1	2	MT872624	SH0912804.10FU	3.54669e-052	207.945	112	1	150	578	729	139	139	92.7	100	150	k__Fungi	p__Ascomycota	c__Eurotiomycetes	o__Eurotiomycetes_ord_Incertae_sedis	f__Eurotiomycetes_fam_Incertae_sedis	g__Eurotiomycetes_gen_Incertae_sedis	s__Eurotiomycetes_sp
OTU164	MOSTABUND|n=3/2	2	1	0	OR885094	SH1025978.10FU	3.84148e-082	307.664	166	1	166	435	600	166	166	100	100	166	k__Fungi	p__Ascomycota	c__Sordariomycetes	o__Hypocreales	f__Hypocreaceae	g__Trichoderma	s__Trichoderma_euskadiense
OTU165	MOSTABUND|n=3/1	2	1	0	OP886682	SH0931161.10FU	2.00752e-069	265.191	143	1	146	935	1080	145	145	99.3	100	146	k__Fungi	p__Ascomycota	c__Leotiomycetes	o__Leotiales	f__Tympanidaceae	g__Pragmopora	s__Pragmopora_pini
OTU166	MOSTABUND|n=3/1	1	0	2	MK782301	SH0850121.10FU	1.70378e-050	202.405	109	1	154	323	488	149	149	96.8	100	154	k__Fungi	p__Ascomycota	c__Saccharomycetes	o__Saccharomycetales	f__Saccharomycetales_fam_Incertae_sedis	g__Saccharomycetales_gen_Incertae_sedis	s__Saccharomycetales_sp
OTU167	MOSTABUND|n=3/2	3	0	0	MN654822	SH0950025.10FU	1.46384e-022	110.073	59	1	151	301	453	125	125	82.8	74.8	202	k__Fungi	p__Basidiomycota	c__Cystobasidiomycetes	o__Cystobasidiomycetes_ord_Incertae_sedis	f__Cystobasidiomycetes_fam_Incertae_sedis	g__Cystobasidiomycetes_gen_Incertae_sedis	s__Cystobasidiomycetes_sp
OTU168	MOSTABUND|n=3/1	0	1	2	UDB05349834	SH0867021.10FU	2.35991e-030	135.926	73	36	192	322	478	134	134	85.4	79.3	198	k__Fungi	p__Basidiomycota	c__Pucciniomycetes	o__Platygloeales	f__Eocronartiaceae	g__Eocronartium	s__Eocronartium_sp
OTU169	MOSTABUND|n=3/1	1	0	2	UDB07674985	SH1012176.10FU	6.97763e-069	263.345	142	1	142	317	458	142	142	100	100	142	k__Fungi	p__Ascomycota	c__Leotiomycetes	o__Helotiales	f__Pezizellaceae	g__Ciliolarina	s__Ciliolarina_sp
OTU170	MOSTABUND|n=3/1	1	0	2	MZ503735	SH0985059.10FU	1.33706e-102	375.99	203	1	206	502	707	205	205	99.5	100	206	k__Fungi	p__Ascomycota	c__Dothideomycetes	o__Venturiales	f__Sympoventuriaceae	g__Scolecobasidium	s__Scolecobasidium_globale
OTU171	MOSTABUND|n=2/1	0	0	2	UDB04121108	SH0905534.10FU	6.99324e-060	233.798	126	1	174	367	535	160	160	92	100	174	k__Fungi	p__Ascomycota	c__Dothideomycetes	o__Coniosporiales	f__Coniosporiaceae	g__Coniosporium	s__Coniosporium_sp
OTU172	MOSTABUND|n=2/1	1	1	0	UDB04100206	SH0939722.10FU	4.9313e-071	270.731	146	1	158	335	492	155	155	98.1	96.9	163	k__Fungi	p__Ascomycota	c__Eurotiomycetes	o__Eurotiales	f__Aspergillaceae	g__Penicillium	s__Penicillium_sp
OTU173	MOSTABUND|n=2/1	2	0	0	MT872624	SH0912804.10FU	1.68724e-040	169.165	91	1	125	578	701	114	114	91.2	82.8	151	k__Fungi	p__Ascomycota	c__Eurotiomycetes	o__Eurotiomycetes_ord_Incertae_sedis	f__Eurotiomycetes_fam_Incertae_sedis	g__Eurotiomycetes_gen_Incertae_sedis	s__Eurotiomycetes_sp
OTU174	MOSTABUND|n=2/1	1	0	1	MT872626	SH0912803.10FU	2.72783e-068	261.498	141	1	151	1577	1726	148	148	98	99.3	152	k__Fungi	p__Ascomycota	c__Eurotiomycetes	o__Eurotiomycetes_ord_Incertae_sedis	f__Eurotiomycetes_fam_Incertae_sedis	g__Eurotiomycetes_gen_Incertae_sedis	s__Eurotiomycetes_sp
OTU175	MOSTABUND|n=2/1	2	0	0	OR800251	SH0862152.10FU	2.14413e-074	281.811	152	1	155	331	485	154	154	99.4	100	155	k__Fungi	p__Ascomycota	c__Dothideomycetes	o__Pleosporales	f__Didymellaceae	g__Epicoccum	s__Epicoccum_sp
OTU176	MOSTABUND|n=2/2	0	0	2	FJ028703	SH0763640.10FU	7.65141e-074	279.964	151	1	154	326	479	153	153	99.4	100	154	k__Fungi	p__Ascomycota	c__Dothideomycetes	o__Capnodiales	f__Capnodiales_fam_Incertae_sedis	g__Capnodiales_gen_Incertae_sedis	s__Capnodiales_sp
OTU177	MOSTABUND|n=2/1	2	0	0	OR778324	SH0974277.10FU	2.22881e-079	298.431	161	1	161	385	545	161	161	100	100	161	k__Fungi	p__Ascomycota	c__Pezizomycetes	o__Pezizales	f__Pyronemataceae	g__Pyronema	s__Pyronema_sp
OTU178	MOSTABUND|n=2/1	0	1	1	UDB03073244	SH0962330.10FU	3.39167e-072	274.424	148	1	148	312	459	148	148	100	100	148	k__Fungi	p__Ascomycota	c__Dothideomycetes	o__Cladosporiales	f__Cladosporiaceae	g__Cladosporium	s__Cladosporium_sp
OTU179	MOSTABUND|n=2/1	0	2	0	FM173097	SH0974823.10FU	4.62024e-077	291.044	157	1	191	359	548	181	181	94.8	99	193	k__Fungi	p__Ascomycota	c__Eurotiomycetes	o__Chaetothyriales	f__Herpotrichiellaceae	g__Exophiala	s__Exophiala_sp
OTU180	MOSTABUND|n=2/1	2	0	0	OP045988	SH0880566.10FU	5.31286e-117	424.003	229	1	229	341	569	229	229	100	100	229	k__Fungi	p__Basidiomycota	c__Microbotryomycetes	o__Microbotryomycetes_ord_Incertae_sedis	f__Colacogloeaceae	g__Colacogloea	s__Colacogloea_sp
OTU181	MOSTABUND|n=2/1	1	0	1	UDB03610486	SH1012176.10FU	5.52681e-065	250.418	135	1	144	317	460	141	141	97.9	100	144	k__Fungi	p__Ascomycota	c__Leotiomycetes	o__Helotiales	f__Helotiales_fam_Incertae_sedis	g__Infundichalara	s__Infundichalara_sp
OTU182	MOSTABUND|n=2/1	0	0	2	OQ422967	SH0743871.10FU	6.14778e-075	283.658	153	1	159	325	483	157	157	98.7	100	159	k__Fungi	p__Basidiomycota	c__Tremellomycetes	o__Tremellales	f__Naemateliaceae	g__Naematelia	s__Naematelia_encephala
OTU183	MOSTABUND|n=2/1	1	0	1	UDB03689247	SH0821637.10FU	1.26019e-071	272.578	147	3	152	374	523	149	149	99.3	98.7	152	k__Fungi	p__Ascomycota	c__Dothideomycetes	o__Pleosporales	f__Phaeosphaeriaceae	g__Paraphoma	s__Paraphoma_sp
OTU184	MOSTABUND|n=2/1	0	0	2	MT872624	SH0912804.10FU	1.28328e-041	172.859	93	1	149	578	729	133	133	89.3	100	149	k__Fungi	p__Ascomycota	c__Eurotiomycetes	o__Eurotiomycetes_ord_Incertae_sedis	f__Eurotiomycetes_fam_Incertae_sedis	g__Eurotiomycetes_gen_Incertae_sedis	s__Eurotiomycetes_sp
OTU185	MOSTABUND|n=2/2	0	1	1	OR069631	SH0972258.10FU	6.97763e-069	263.345	142	1	142	303	444	142	142	100	100	142	k__Fungi	p__Ascomycota	c__Dothideomycetes	o__Dothideales	f__Dothideaceae	g__Sydowia	s__Sydowia_polyspora
OTU186	MOSTABUND|n=2/1	0	0	2	UDB01886795	SH0958714.10FU	8.94791e-025	117.459	63	4	160	299	448	130	130	82.8	76.2	206	k__Fungi	p__Basidiomycota	c__Agaricostilbomycetes	o__Agaricostilbales	f__Chionosphaeraceae	g__Chionosphaeraceae_gen_Incertae_sedis	s__Chionosphaeraceae_sp
OTU187	MOSTABUND|n=2/1	1	0	1	UDB05377383	SH0949870.10FU	2.56083e-090	335.364	181	3	229	300	524	212	212	93.4	99.1	229	k__Fungi	p__Basidiomycota	c__Cystobasidiomycetes	o__Erythrobasidiales	f__Erythrobasidiales_fam_Incertae_sedis	g__Erythrobasidiales_gen_Incertae_sedis	s__Erythrobasidiales_sp
OTU188	MOSTABUND|n=2/1	1	0	1	KM104151	SH0907363.10FU	4.96695e-087	324.284	175	1	205	390	594	197	197	96.1	98.6	208	k__Fungi	p__Fungi_phy_Incertae_sedis	c__Fungi_cls_Incertae_sedis	o__Fungi_ord_Incertae_sedis	f__Fungi_fam_Incertae_sedis	g__Fungi_gen_Incertae_sedis	s__Fungi_sp
OTU189	MOSTABUND|n=2/1	0	0	2	UDB01571240	SH0947752.10FU	2.25658e-090	335.364	181	1	205	296	500	198	198	96.6	100	205	k__Fungi	p__Basidiomycota	c__Cystobasidiomycetes	o__Buckleyzymales	f__Buckleyzymaceae	g__Buckleyzyma	s__Buckleyzyma_sp
OTU190	MOSTABUND|n=2/1	2	0	0	UDB03610486	SH1012176.10FU	5.52681e-065	250.418	135	1	141	317	457	139	139	98.6	97.9	144	k__Fungi	p__Ascomycota	c__Leotiomycetes	o__Helotiales	f__Helotiales_fam_Incertae_sedis	g__Infundichalara	s__Infundichalara_sp
OTU191	MOSTABUND|n=2/1	1	0	1	AJ972850	SH0763614.10FU	5.98886e-055	217.178	117	1	146	350	497	139	139	95.2	96.1	152	k__Fungi	p__Ascomycota	c__Dothideomycetes	o__Mycosphaerellales	f__Teratosphaeriaceae	g__Capnobotryella	s__Capnobotryella_sp
OTU192	MOSTABUND|n=2/2	1	0	1	AM901832	SH0934681.10FU	1.47151e-102	375.99	203	1	224	539	762	217	217	96.9	100	224	k__Fungi	p__Basidiomycota	c__Exobasidiomycetes	o__Exobasidiales	f__Exobasidiaceae	g__Exobasidium	s__Exobasidium_sp
OTU193	MOSTABUND|n=2/1	0	2	0	UDB05026986	SH0754434.10FU	6.08468e-055	217.178	117	1	153	343	502	147	147	96.1	99.4	154	k__Fungi	p__Ascomycota	c__Sordariomycetes	o__Diaporthales	f__Cytosporaceae	g__Cytospora	s__Cytospora_sp
OTU194	MOSTABUND|n=2/1	2	0	0	UDB07674985	SH1012176.10FU	1.18791e-066	255.958	138	1	144	315	458	142	142	98.6	100	144	k__Fungi	p__Ascomycota	c__Leotiomycetes	o__Helotiales	f__Pezizellaceae	g__Ciliolarina	s__Ciliolarina_sp
OTU195	MOSTABUND|n=2/1	1	0	1	OR633246	SH0939673.10FU	1.01375e-077	292.891	158	1	158	441	598	158	158	100	100	158	k__Fungi	p__Ascomycota	c__Eurotiomycetes	o__Eurotiales	f__Aspergillaceae	g__Penicillium	s__Penicillium_glabrum
OTU196	MOSTABUND|n=2/1	0	1	1	UDB04173865	SH0927678.10FU	4.88463e-087	324.284	175	1	205	308	512	195	195	95.1	100	205	k__Fungi	p__Basidiomycota	c__Microbotryomycetes	o__Microbotryomycetes_ord_Incertae_sedis	f__Microbotryomycetes_fam_Incertae_sedis	g__Microbotryomycetes_gen_Incertae_sedis	s__Microbotryomycetes_sp
OTU197	SINGLETON|n=1	1	0	0	MT872624	SH0912804.10FU	9.88068e-063	243.031	131	1	152	578	729	145	145	95.4	100	152	k__Fungi	p__Ascomycota	c__Eurotiomycetes	o__Eurotiomycetes_ord_Incertae_sedis	f__Eurotiomycetes_fam_Incertae_sedis	g__Eurotiomycetes_gen_Incertae_sedis	s__Eurotiomycetes_sp
OTU198	SINGLETON|n=1	1	0	0	MT872624	SH0912804.10FU	3.52529e-062	241.185	130	1	151	578	729	145	145	96	100	151	k__Fungi	p__Ascomycota	c__Eurotiomycetes	o__Eurotiomycetes_ord_Incertae_sedis	f__Eurotiomycetes_fam_Incertae_sedis	g__Eurotiomycetes_gen_Incertae_sedis	s__Eurotiomycetes_sp
OTU199	SINGLETON|n=1	1	0	0	MH188916	SH0926074.10FU	9.37408e-105	383.377	207	1	237	347	584	229	229	96.6	100	237	k__Fungi	p__Basidiomycota	c__Exobasidiomycetes	o__Exobasidiales	f__Exobasidiales_fam_Incertae_sedis	g__Guomyces	s__Guomyces_nicotianae
OTU200	SINGLETON|n=1	1	0	0	OK039352	SH0844762.10FU	1.86676e-051	206.098	111	1	204	269	473	175	175	85.8	98.6	207	k__Fungi	p__Basidiomycota	c__Cystobasidiomycetes	o__Naohideales	f__Naohideaceae	g__Naohidea	s__Naohidea_sebacea
OTU201	SINGLETON|n=1	1	0	0															k_	p_	c_	o_	f_	g_	s_
OTU202	SINGLETON|n=1	1	0	0	KM104151	SH0907363.10FU	1.05258e-098	363.064	196	1	205	390	594	202	202	98.5	98.6	208	k__Fungi	p__Fungi_phy_Incertae_sedis	c__Fungi_cls_Incertae_sedis	o__Fungi_ord_Incertae_sedis	f__Fungi_fam_Incertae_sedis	g__Fungi_gen_Incertae_sedis	s__Fungi_sp
OTU203	SINGLETON|n=1	1	0	0	UDB03609281	SH1012176.10FU	1.97081e-064	248.571	134	1	143	317	460	141	141	98.6	100	143	k__Fungi	p__Ascomycota	c__Leotiomycetes	o__Helotiales	f__Helotiales_fam_Incertae_sedis	g__Infundichalara	s__Infundichalara_sp
OTU204	SINGLETON|n=1	1	0	0	MH864788	SH0885672.10FU	1.53074e-081	305.817	165	1	181	357	536	176	176	97.2	100	181	k__Fungi	p__Ascomycota	c__Eurotiomycetes	o__Chaetothyriales	f__Herpotrichiellaceae	g__Rhinocladiella	s__Rhinocladiella_atrovirens
OTU205	SINGLETON|n=1	1	0	0	OQ102311	SH0762231.10FU	9.61409e-089	329.824	178	1	190	358	548	187	187	98.4	100	190	k__Fungi	p__Basidiomycota	c__Agaricomycetes	o__Polyporales	f__Polyporaceae	g__Trametes	s__Trametes_versicolor
OTU206	SINGLETON|n=1	1	0	0															k_	p_	c_	o_	f_	g_	s_
OTU207	SINGLETON|n=1	1	0	0	EU030275	SH0828639.10FU	8.25181e-069	263.345	142	1	160	334	493	154	154	96.3	98.2	163	k__Fungi	p__Ascomycota	c__Eurotiomycetes	o__Chaetothyriales	f__Herpotrichiellaceae	g__Sorocybe	s__Sorocybe_resinae
OTU208	SINGLETON|n=1	1	0	0	OQ832651	SH0856291.10FU	1.32138e-076	289.198	156	1	159	374	532	158	158	99.4	100	159	k__Fungi	p__Ascomycota	c__Dothideomycetes	o__Pleosporales	f__Pleosporaceae	g__Stemphylium	s__Stemphylium_globuliferum
OTU209	SINGLETON|n=1	1	0	0	MH862405	SH0950131.10FU	2.85708e-063	244.878	132	1	153	345	498	147	147	96.1	97.5	157	k__Fungi	p__Ascomycota	c__Xylonomycetes	o__Symbiotaphrinales	f__Symbiotaphrinaceae	g__Symbiotaphrina	s__Symbiotaphrina_lignicola
OTU210	SINGLETON|n=1	1	0	0	JF705945	SH0738016.10FU	2.79115e-063	244.878	132	1	153	332	484	147	147	96.1	99.4	154	k__Fungi	p__Ascomycota	c__Sareomycetes	o__Sareales	f__Sareaceae	g__Sarea	s__Sarea_sp
OTU211	SINGLETON|n=1	1	0	0															k_	p_	c_	o_	f_	g_	s_
OTU212	SINGLETON|n=1	1	0	0	OP046435	SH0760250.10FU	5.39176e-117	424.003	229	1	232	574	805	231	231	99.6	100	232	k__Fungi	p__Ascomycota	c__Saccharomycetes	o__Saccharomycetales	f__Saccharomycetaceae	g__Saccharomyces	s__Saccharomyces_cerevisiae
OTU213	SINGLETON|n=1	1	0	0	GU062229	SH0926075.10FU	3.64651e-119	431.39	233	1	255	308	561	248	248	97.3	98.5	259	k__Fungi	p__Basidiomycota	c__Basidiomycota_cls_Incertae_sedis	o__Basidiomycota_ord_Incertae_sedis	f__Basidiomycota_fam_Incertae_sedis	g__Basidiomycota_gen_Incertae_sedis	s__Basidiomycota_sp
OTU214	SINGLETON|n=1	1	0	0	GU062229	SH0926075.10FU	7.8933e-116	420.31	227	1	255	308	561	246	246	96.5	98.5	259	k__Fungi	p__Basidiomycota	c__Basidiomycota_cls_Incertae_sedis	o__Basidiomycota_ord_Incertae_sedis	f__Basidiomycota_fam_Incertae_sedis	g__Basidiomycota_gen_Incertae_sedis	s__Basidiomycota_sp
OTU215	SINGLETON|n=1	1	0	0	KX148023	SH0938147.10FU	4.53245e-071	270.731	146	1	152	321	472	150	150	98.7	100	152	k__Fungi	p__Ascomycota	c__Dothideomycetes	o__Mycosphaerellales	f__Teratosphaeriaceae	g__Constantinomyces	s__Constantinomyces_sp
OTU216	SINGLETON|n=1	1	0	0															k_	p_	c_	o_	f_	g_	s_
OTU217	SINGLETON|n=1	1	0	0	GU062229	SH0926075.10FU	7.8933e-116	420.31	227	1	255	308	561	246	246	96.5	98.5	259	k__Fungi	p__Basidiomycota	c__Basidiomycota_cls_Incertae_sedis	o__Basidiomycota_ord_Incertae_sedis	f__Basidiomycota_fam_Incertae_sedis	g__Basidiomycota_gen_Incertae_sedis	s__Basidiomycota_sp
OTU218	SINGLETON|n=1	1	0	0	GU062229	SH0926075.10FU	3.72473e-104	381.53	206	1	255	308	561	239	239	93.7	98.5	259	k__Fungi	p__Basidiomycota	c__Basidiomycota_cls_Incertae_sedis	o__Basidiomycota_ord_Incertae_sedis	f__Basidiomycota_fam_Incertae_sedis	g__Basidiomycota_gen_Incertae_sedis	s__Basidiomycota_sp
OTU219	SINGLETON|n=1	1	0	0	GU062229	SH0926075.10FU	3.69847e-109	398.15	215	1	255	308	561	242	242	94.9	98.5	259	k__Fungi	p__Basidiomycota	c__Basidiomycota_cls_Incertae_sedis	o__Basidiomycota_ord_Incertae_sedis	f__Basidiomycota_fam_Incertae_sedis	g__Basidiomycota_gen_Incertae_sedis	s__Basidiomycota_sp
OTU220	SINGLETON|n=1	1	0	0	GU062229	SH0926075.10FU	3.65657e-114	414.77	224	1	254	308	561	244	244	96.1	98.4	258	k__Fungi	p__Basidiomycota	c__Basidiomycota_cls_Incertae_sedis	o__Basidiomycota_ord_Incertae_sedis	f__Basidiomycota_fam_Incertae_sedis	g__Basidiomycota_gen_Incertae_sedis	s__Basidiomycota_sp
OTU221	SINGLETON|n=1	1	0	0	GU062229	SH0926075.10FU	6.02299e-117	424.003	229	1	252	308	561	246	246	97.6	98.4	256	k__Fungi	p__Basidiomycota	c__Basidiomycota_cls_Incertae_sedis	o__Basidiomycota_ord_Incertae_sedis	f__Basidiomycota_fam_Incertae_sedis	g__Basidiomycota_gen_Incertae_sedis	s__Basidiomycota_sp
OTU222	SINGLETON|n=1	1	0	0	GU062229	SH0926075.10FU	1.68924e-117	425.85	230	1	254	308	561	246	246	96.9	98.4	258	k__Fungi	p__Basidiomycota	c__Basidiomycota_cls_Incertae_sedis	o__Basidiomycota_ord_Incertae_sedis	f__Basidiomycota_fam_Incertae_sedis	g__Basidiomycota_gen_Incertae_sedis	s__Basidiomycota_sp
OTU223	SINGLETON|n=1	1	0	0	GU062229	SH0926075.10FU	2.79462e-120	435.083	235	1	253	308	561	248	248	98	98.4	257	k__Fungi	p__Basidiomycota	c__Basidiomycota_cls_Incertae_sedis	o__Basidiomycota_ord_Incertae_sedis	f__Basidiomycota_fam_Incertae_sedis	g__Basidiomycota_gen_Incertae_sedis	s__Basidiomycota_sp
OTU224	SINGLETON|n=1	1	0	0	GU062229	SH0926075.10FU	1.69655e-117	425.85	230	1	255	308	561	247	247	96.9	98.5	259	k__Fungi	p__Basidiomycota	c__Basidiomycota_cls_Incertae_sedis	o__Basidiomycota_ord_Incertae_sedis	f__Basidiomycota_fam_Incertae_sedis	g__Basidiomycota_gen_Incertae_sedis	s__Basidiomycota_sp
OTU225	SINGLETON|n=1	1	0	0	GU062229	SH0926075.10FU	3.65657e-114	414.77	224	1	254	308	561	244	244	96.1	98.4	258	k__Fungi	p__Basidiomycota	c__Basidiomycota_cls_Incertae_sedis	o__Basidiomycota_ord_Incertae_sedis	f__Basidiomycota_fam_Incertae_sedis	g__Basidiomycota_gen_Incertae_sedis	s__Basidiomycota_sp
OTU226	SINGLETON|n=1	1	0	0	UDB01441599	SH0878054.10FU	3.86875e-077	291.044	157	1	166	343	509	164	164	98.8	100	166	k__Fungi	p__Ascomycota	c__Eurotiomycetes	o__Eurotiales	f__Aspergillaceae	g__Aspergillus	s__Aspergillus_sp
OTU227	SINGLETON|n=1	1	0	0	OK584507	SH1012176.10FU	7.21049e-064	246.725	133	1	145	381	525	141	141	97.2	100	145	k__Fungi	p__Ascomycota	c__Leotiomycetes	o__Helotiales	f__Helotiales_fam_Incertae_sedis	g__Infundichalara	s__Infundichalara_sp
OTU228	SINGLETON|n=1	1	0	0	KY087605	SH0878054.10FU	8.43261e-064	246.725	133	1	165	224	390	156	156	94.5	100	165	k__Fungi	p__Ascomycota	c__Eurotiomycetes	o__Eurotiales	f__Aspergillaceae	g__Aspergillus	s__Aspergillus_domesticus
OTU229	SINGLETON|n=1	1	0	0	UDB03608770	SH1012176.10FU	9.24831e-063	243.031	131	1	143	317	459	139	139	97.2	99.3	144	k__Fungi	p__Ascomycota	c__Leotiomycetes	o__Helotiales	f__Helotiales_fam_Incertae_sedis	g__Infundichalara	s__Infundichalara_sp
OTU230	SINGLETON|n=1	1	0	0	OR613450	SH0822656.10FU	2.14988e-100	368.604	199	1	199	393	591	199	199	100	100	199	k__Fungi	p__Basidiomycota	c__Agaricomycetes	o__Agaricales	f__Pleurotaceae	g__Pleurotus	s__Pleurotus_ostreatus
OTU231	SINGLETON|n=1	1	0	0	MW710094	SH0733979.10FU	5.53599e-112	407.383	220	1	236	324	558	232	232	98.3	100	236	k__Fungi	p__Basidiomycota	c__Microbotryomycetes	o__Microbotryomycetes_ord_Incertae_sedis	f__Colacogloeaceae	g__Colacogloea	s__Colacogloea_philyla
OTU232	SINGLETON|n=1	1	0	0	MZ133732	SH0875505.10FU	3.80195e-042	174.705	94	1	157	421	584	142	142	90.4	100	157	k__Fungi	p__Ascomycota	c__Eurotiomycetes	o__Onygenales	f__Gymnoascaceae	g__Gymnoascus	s__Gymnoascus_halophilus
OTU233	SINGLETON|n=1	1	0	0	UDB04066668	SH0940202.10FU	3.83919e-067	257.805	139	1	160	333	493	154	154	96.3	98.2	163	k__Fungi	p__Ascomycota	c__Eurotiomycetes	o__Eurotiales	f__Aspergillaceae	g__Penicillium	s__Penicillium_sp
OTU234	SINGLETON|n=1	1	0	0	OR687493	SH1022674.10FU	4.9084e-107	390.763	211	1	211	302	512	211	211	100	100	211	k__Fungi	p__Basidiomycota	c__Microbotryomycetes	o__Leucosporidiales	f__Leucosporidiaceae	g__Leucosporidium	s__Leucosporidium_scottii
OTU235	SINGLETON|n=1	1	0	0	LN713992	SH0763609.10FU	3.55986e-072	274.424	148	1	154	299	452	152	152	98.7	100	154	k__Fungi	p__Ascomycota	c__Dothideomycetes	o__Mycosphaerellales	f__Neodevriesiaceae	g__Neodevriesia	s__Neodevriesia_sp
OTU236	SINGLETON|n=1	1	0	0	NR_073266	SH0841248.10FU	1.30141e-097	359.37	194	1	200	341	540	198	198	99	100	200	k__Fungi	p__Basidiomycota	c__Agaricostilbomycetes	o__Agaricostilbales	f__Chionosphaeraceae	g__Kurtzmanomyces	s__Kurtzmanomyces_nectairei
OTU237	SINGLETON|n=1	1	0	0	OR752067	SH0940075.10FU	2.99029e-073	278.118	150	1	165	364	528	160	160	97	100	165	k__Fungi	p__Ascomycota	c__Eurotiomycetes	o__Eurotiales	f__Aspergillaceae	g__Aspergillus	s__Aspergillus_fumigatus
OTU238	SINGLETON|n=1	1	0	0	MK163843	SH0881750.10FU	5.48785e-070	267.038	144	1	144	325	468	144	144	100	100	144	k__Fungi	p__Ascomycota	c__Leotiomycetes	o__Thelebolales	f__Pseudeurotiaceae	g__Pseudeurotium	s__Pseudeurotium_sp
OTU239	SINGLETON|n=1	1	0	0	MK782305	SH0850121.10FU	2.8978e-053	211.638	114	1	157	323	490	152	152	96.8	100	157	k__Fungi	p__Ascomycota	c__Saccharomycetes	o__Saccharomycetales	f__Saccharomycetales_fam_Incertae_sedis	g__Saccharomycetales_gen_Incertae_sedis	s__Saccharomycetales_sp
OTU240	SINGLETON|n=1	1	0	0															k_	p_	c_	o_	f_	g_	s_
OTU241	SINGLETON|n=1	1	0	0	OR378530	SH0856167.10FU	2.36174e-084	315.051	170	1	170	312	481	170	170	100	100	170	k__Fungi	p__Basidiomycota	c__Tremellomycetes	o__Trichosporonales	f__Trichosporonaceae	g__Trichosporon	s__Trichosporon_sp
OTU242	SINGLETON|n=1	1	0	0	UDB03038609	SH0965249.10FU	2.14413e-074	281.811	152	1	155	350	504	154	154	99.4	100	155	k__Fungi	p__Ascomycota	c__Dothideomycetes	o__Pleosporales	f__Phaeosphaeriaceae	g__Leptospora	s__Leptospora_sp
OTU243	SINGLETON|n=1	1	0	0															k_	p_	c_	o_	f_	g_	s_
OTU244	SINGLETON|n=1	1	0	0	OW988561	SH0958759.10FU	1.95232e-090	335.364	181	1	181	382	562	181	181	100	100	181	k__Fungi	p__Ascomycota	c__Saccharomycetes	o__Saccharomycetales	f__Phaffomycetaceae	g__Cyberlindnera	s__Cyberlindnera_mississippiensis
OTU245	SINGLETON|n=1	1	0	0	HQ611323	SH0974823.10FU	3.98706e-073	278.118	150	1	156	402	557	154	154	98.7	73.9	211	k__Fungi	p__Ascomycota	c__Eurotiomycetes	o__Chaetothyriales	f__Herpotrichiellaceae	g__Exophiala	s__Exophiala_sp
OTU246	SINGLETON|n=1	1	0	0	OR415647	SH0740357.10FU	7.95641e-079	296.584	160	1	160	394	553	160	160	100	100	160	k__Fungi	p__Ascomycota	c__Sordariomycetes	o__Hypocreales	f__Cordycipitaceae	g__Akanthomyces	s__Akanthomyces_lecanii
OTU247	SINGLETON|n=1	1	0	0	MW842891	SH0801445.10FU	2.14413e-074	281.811	152	1	155	337	491	154	154	99.4	100	155	k__Fungi	p__Fungi_phy_Incertae_sedis	c__Fungi_cls_Incertae_sedis	o__Fungi_ord_Incertae_sedis	f__Fungi_fam_Incertae_sedis	g__Fungi_gen_Incertae_sedis	s__Fungi_sp
OTU248	SINGLETON|n=1	1	0	0	UDB03955738	SH0939707.10FU	1.04433e-072	276.271	149	1	161	331	492	158	158	98.1	100	161	k__Fungi	p__Ascomycota	c__Eurotiomycetes	o__Eurotiales	f__Aspergillaceae	g__Penicillium	s__Penicillium_sp
OTU249	SINGLETON|n=1	1	0	0	ON989591	SH0976639.10FU	1.46116e-081	305.817	165	1	174	287	460	171	171	98.3	100	174	k__Fungi	p__Ascomycota	c__Eurotiomycetes	o__Chaetothyriales	f__Herpotrichiellaceae	g__Exophiala	s__Exophiala_bergeri
OTU250	SINGLETON|n=1	1	0	0	LC272919	SH0915560.10FU	3.83802e-062	241.185	130	1	162	362	525	153	153	94.4	100	162	k__Fungi	p__Ascomycota	c__Dothideomycetes	o__Myriangiales	f__Myriangiales_fam_Incertae_sedis	g__Myriangiales_gen_Incertae_sedis	s__Myriangiales_sp
OTU251	SINGLETON|n=1	1	0	0	PP115452	SH0911881.10FU	6.50989e-096	353.83	191	2	213	309	520	205	205	96.7	99.5	213	k__Fungi	p__Basidiomycota	c__Microbotryomycetes	o__Sporidiobolales	f__Sporidiobolaceae	g__Sporobolomyces	s__Sporobolomyces_salmonicolor
OTU252	SINGLETON|n=1	1	0	0	PP115452	SH0911881.10FU	1.40157e-092	342.75	185	1	212	308	520	204	204	96.2	100	212	k__Fungi	p__Basidiomycota	c__Microbotryomycetes	o__Sporidiobolales	f__Sporidiobolaceae	g__Sporobolomyces	s__Sporobolomyces_salmonicolor
OTU253	SINGLETON|n=1	1	0	0	MT872624	SH0912804.10FU	1.29239e-036	156.239	84	1	149	578	729	130	130	87.2	100	149	k__Fungi	p__Ascomycota	c__Eurotiomycetes	o__Eurotiomycetes_ord_Incertae_sedis	f__Eurotiomycetes_fam_Incertae_sedis	g__Eurotiomycetes_gen_Incertae_sedis	s__Eurotiomycetes_sp
OTU254	SINGLETON|n=1	1	0	0	PP115452	SH0911881.10FU	1.80999e-096	355.677	192	1	213	308	520	206	206	96.7	100	213	k__Fungi	p__Basidiomycota	c__Microbotryomycetes	o__Sporidiobolales	f__Sporidiobolaceae	g__Sporobolomyces	s__Sporobolomyces_salmonicolor
OTU255	SINGLETON|n=1	1	0	0	MH188916	SH0926074.10FU	5.62865e-107	390.763	211	1	229	347	575	224	224	97.8	96.2	238	k__Fungi	p__Basidiomycota	c__Exobasidiomycetes	o__Exobasidiales	f__Exobasidiales_fam_Incertae_sedis	g__Guomyces	s__Guomyces_nicotianae
OTU256	SINGLETON|n=1	1	0	0	KT265804	SH0733984.10FU	9.37184e-095	350.137	189	1	232	883	1113	218	218	94	99.1	234	k__Fungi	p__Basidiomycota	c__Microbotryomycetes	o__Sporidiobolales	f__Sporidiobolaceae	g__Rhodotorula	s__Rhodotorula_sp
OTU257	SINGLETON|n=1	1	0	0	GU062229	SH0926075.10FU	3.6724e-114	414.77	224	1	255	308	561	245	245	96.1	98.5	259	k__Fungi	p__Basidiomycota	c__Basidiomycota_cls_Incertae_sedis	o__Basidiomycota_ord_Incertae_sedis	f__Basidiomycota_fam_Incertae_sedis	g__Basidiomycota_gen_Incertae_sedis	s__Basidiomycota_sp
OTU258	SINGLETON|n=1	1	0	0															k_	p_	c_	o_	f_	g_	s_
OTU259	SINGLETON|n=1	1	0	0	UDB05110292	SH1015336.10FU	9.16927e-063	243.031	131	1	143	311	453	139	139	97.2	100	143	k__Fungi	p__Ascomycota	c__Dothideomycetes	o__Mycosphaerellales	f__Teratosphaeriaceae	g__Devriesia	s__Devriesia_sp
OTU260	SINGLETON|n=1	0	1	0	MT872626	SH0912803.10FU	2.15191e-049	198.712	107	1	151	1577	1729	138	138	91.4	100	151	k__Fungi	p__Ascomycota	c__Eurotiomycetes	o__Eurotiomycetes_ord_Incertae_sedis	f__Eurotiomycetes_fam_Incertae_sedis	g__Eurotiomycetes_gen_Incertae_sedis	s__Eurotiomycetes_sp
OTU261	SINGLETON|n=1	0	1	0															k_	p_	c_	o_	f_	g_	s_
OTU262	SINGLETON|n=1	0	1	0	OQ696196	SH0762921.10FU	1.0282e-067	259.651	140	1	158	378	536	153	153	96.8	100	158	k__Fungi	p__Ascomycota	c__Sordariomycetes	o__Xylariales	f__Leptosilliaceae	g__Leptosillia	s__Leptosillia_pistaciae
OTU263	SINGLETON|n=1	1	0	0	MK336477	SH0958718.10FU	1.60032e-081	305.817	165	1	188	720	909	182	182	96.8	100	188	k__Fungi	p__Basidiomycota	c__Agaricostilbomycetes	o__Agaricostilbales	f__Agaricostilbales_fam_Incertae_sedis	g__Agaricostilbales_gen_Incertae_sedis	s__Agaricostilbales_sp
OTU264	SINGLETON|n=1	0	1	0	OR793058	SH0767731.10FU	1.34084e-071	272.578	147	2	160	363	521	155	155	97.5	99.4	160	k__Fungi	p__Ascomycota	c__Eurotiomycetes	o__Eurotiales	f__Aspergillaceae	g__Penicillium	s__Penicillium_fundyense
OTU265	SINGLETON|n=1	0	1	0	OR793058	SH0767731.10FU	4.78626e-071	270.731	146	1	158	362	519	154	154	97.5	99.4	159	k__Fungi	p__Ascomycota	c__Eurotiomycetes	o__Eurotiales	f__Aspergillaceae	g__Penicillium	s__Penicillium_fundyense
OTU266	SINGLETON|n=1	1	0	0	DQ870625	SH0880564.10FU	7.94367e-061	237.491	128	1	238	356	590	207	207	87	97.9	243	k__Fungi	p__Basidiomycota	c__Microbotryomycetes	o__Microbotryomycetes_ord_Incertae_sedis	f__Colacogloeaceae	g__Colacogloea	s__Colacogloea_subericola
OTU267	SINGLETON|n=1	1	0	0	GU062229	SH0926075.10FU	7.85928e-116	420.31	227	1	254	308	561	245	245	96.5	98.4	258	k__Fungi	p__Basidiomycota	c__Basidiomycota_cls_Incertae_sedis	o__Basidiomycota_ord_Incertae_sedis	f__Basidiomycota_fam_Incertae_sedis	g__Basidiomycota_gen_Incertae_sedis	s__Basidiomycota_sp
OTU268	SINGLETON|n=1	1	0	0	GU062229	SH0926075.10FU	1.04008e-104	383.377	207	1	256	308	561	240	240	93.8	98.5	260	k__Fungi	p__Basidiomycota	c__Basidiomycota_cls_Incertae_sedis	o__Basidiomycota_ord_Incertae_sedis	f__Basidiomycota_fam_Incertae_sedis	g__Basidiomycota_gen_Incertae_sedis	s__Basidiomycota_sp
OTU269	SINGLETON|n=1	0	1	0	UDB03123846	SH0924986.10FU	1.00465e-067	259.651	140	1	155	330	485	151	151	97.4	100	155	k__Fungi	p__Ascomycota	c__Dothideomycetes	o__Mytilinidiales	f__Mytilinidiaceae	g__Lophium	s__Lophium_sp
OTU270	SINGLETON|n=1	0	1	0	UDB03123353	SH0924986.10FU	1.00465e-067	259.651	140	1	155	329	483	150	150	96.8	100	155	k__Fungi	p__Ascomycota	c__Dothideomycetes	o__Mytilinidiales	f__Mytilinidiaceae	g__Lophium	s__Lophium_sp
OTU271	SINGLETON|n=1	0	1	0	AY559372	SH0842946.10FU	9.10463e-068	259.651	140	1	143	314	456	142	142	99.3	100	143	k__Fungi	p__Ascomycota	c__Dothideomycetes	o__Mycosphaerellales	f__Extremaceae	g__Petrophila	s__Petrophila_incerta
OTU272	SINGLETON|n=1	0	1	0	MK801314	SH0950131.10FU	1.3593e-056	222.718	120	3	156	394	546	143	143	92.9	96.9	159	k__Fungi	p__Ascomycota	c__Xylonomycetes	o__Symbiotaphrinales	f__Symbiotaphrinaceae	g__Symbiotaphrina	s__Symbiotaphrina_microtheca
OTU273	SINGLETON|n=1	0	1	0	ON422185	SH0887053.10FU	5.7399e-096	353.83	191	1	191	324	514	191	191	100	100	191	k__Fungi	p__Ascomycota	c__Saccharomycetes	o__Saccharomycetales	f__Debaryomycetaceae	g__Meyerozyma	s__Meyerozyma_sp
OTU274	SINGLETON|n=1	0	1	0	OQ718080	SH0738016.10FU	3.63622e-057	224.565	121	6	154	378	525	140	140	94	96.8	154	k__Fungi	p__Ascomycota	c__Sareomycetes	o__Sareales	f__Sareaceae	g__Sarea	s__Sarea_coeloplata
OTU275	SINGLETON|n=1	1	0	0	GU062229	SH0926075.10FU	3.64651e-119	431.39	233	1	255	308	561	248	248	97.3	98.5	259	k__Fungi	p__Basidiomycota	c__Basidiomycota_cls_Incertae_sedis	o__Basidiomycota_ord_Incertae_sedis	f__Basidiomycota_fam_Incertae_sedis	g__Basidiomycota_gen_Incertae_sedis	s__Basidiomycota_sp
OTU276	SINGLETON|n=1	1	0	0	GU062229	SH0926075.10FU	7.94934e-111	403.69	218	1	255	308	561	243	243	95.3	98.5	259	k__Fungi	p__Basidiomycota	c__Basidiomycota_cls_Incertae_sedis	o__Basidiomycota_ord_Incertae_sedis	f__Basidiomycota_fam_Incertae_sedis	g__Basidiomycota_gen_Incertae_sedis	s__Basidiomycota_sp
OTU277	SINGLETON|n=1	0	1	0	MW842907	SH0972129.10FU	9.02614e-068	259.651	140	1	140	308	447	140	140	100	98.6	142	k__Fungi	p__Fungi_phy_Incertae_sedis	c__Fungi_cls_Incertae_sedis	o__Fungi_ord_Incertae_sedis	f__Fungi_fam_Incertae_sedis	g__Fungi_gen_Incertae_sedis	s__Fungi_sp
OTU278	SINGLETON|n=1	0	1	0	MT813950	SH0950131.10FU	4.74721e-066	254.111	137	1	153	217	368	148	148	96.7	97.5	157	k__Fungi	p__Ascomycota	c__Xylonomycetes	o__Symbiotaphrinales	f__Symbiotaphrinaceae	g__Symbiotaphrina	s__Symbiotaphrina_microtheca
OTU279	SINGLETON|n=1	0	1	0	KJ001866	SH0767731.10FU	4.85878e-071	270.731	146	1	161	308	469	158	158	98.1	100	161	k__Fungi	p__Ascomycota	c__Eurotiomycetes	o__Eurotiales	f__Aspergillaceae	g__Penicillium	s__Penicillium_sp
OTU280	SINGLETON|n=1	1	0	0	GU062229	SH0926075.10FU	1.68924e-117	425.85	230	1	254	308	561	246	246	96.9	98.4	258	k__Fungi	p__Basidiomycota	c__Basidiomycota_cls_Incertae_sedis	o__Basidiomycota_ord_Incertae_sedis	f__Basidiomycota_fam_Incertae_sedis	g__Basidiomycota_gen_Incertae_sedis	s__Basidiomycota_sp
OTU281	SINGLETON|n=1	0	1	0	ON261297	SH0767731.10FU	2.88195e-073	278.118	150	1	160	339	497	157	157	98.1	100	160	k__Fungi	p__Ascomycota	c__Eurotiomycetes	o__Eurotiales	f__Aspergillaceae	g__Penicillium	s__Penicillium_citreonigrum
OTU282	SINGLETON|n=1	0	1	0	OR069551	SH0767731.10FU	2.90362e-073	278.118	150	1	161	331	493	159	159	98.8	100	161	k__Fungi	p__Ascomycota	c__Eurotiomycetes	o__Eurotiales	f__Aspergillaceae	g__Penicillium	s__Penicillium_corylophilum
OTU283	SINGLETON|n=1	0	1	0	OQ874393	SH0767731.10FU	8.3104e-064	246.725	133	1	163	292	454	153	153	93.9	100	163	k__Fungi	p__Ascomycota	c__Eurotiomycetes	o__Eurotiales	f__Aspergillaceae	g__Penicillium	s__Penicillium_sp
OTU284	SINGLETON|n=1	0	1	0	UDB03955738	SH0939707.10FU	4.85878e-071	270.731	146	1	161	331	492	157	157	97.5	100	161	k__Fungi	p__Ascomycota	c__Eurotiomycetes	o__Eurotiales	f__Aspergillaceae	g__Penicillium	s__Penicillium_sp
OTU285	SINGLETON|n=1	0	1	0	OR069551	SH0767731.10FU	3.81213e-072	274.424	148	1	163	331	493	158	158	96.9	100	163	k__Fungi	p__Ascomycota	c__Eurotiomycetes	o__Eurotiales	f__Aspergillaceae	g__Penicillium	s__Penicillium_corylophilum
OTU286	SINGLETON|n=1	1	0	0															k_	p_	c_	o_	f_	g_	s_
OTU287	SINGLETON|n=1	0	1	0	KJ607253	SH0970643.10FU	4.80091e-037	158.086	85	1	178	454	638	155	155	87.1	93.7	190	k__Fungi	p__Ascomycota	c__Sordariomycetes	o__Microascales	f__Microascaceae	g__Pseudallescheria	s__Pseudallescheria_ellipsoidea
OTU288	SINGLETON|n=1	0	1	0	OW988092	SH0940189.10FU	5.07656e-076	287.351	155	1	166	372	539	164	164	98.8	98.8	168	k__Fungi	p__Ascomycota	c__Eurotiomycetes	o__Eurotiales	f__Aspergillaceae	g__Penicillium	s__Penicillium_sanguifluum
OTU289	SINGLETON|n=1	0	1	0	OQ600167	SH0897344.10FU	4.30901e-066	254.111	137	1	137	335	471	137	137	100	94.5	145	k__Fungi	p__Ascomycota	c__Leotiomycetes	o__Thelebolales	f__Pseudeurotiaceae	g__Beskidomyces	s__Beskidomyces_laricis
OTU290	SINGLETON|n=1	0	1	0	UDB06914778	SH0946025.10FU	1.23413e-051	206.098	111	1	143	319	464	135	135	94.4	97.9	146	k__Fungi	p__Ascomycota	c__Leotiomycetes	o__Leotiales	f__Tympanidaceae	g__Tympanidaceae_gen_Incertae_sedis	s__Tympanidaceae_sp
OTU291	SINGLETON|n=1	0	1	0	UDB07491272	SH1012233.10FU	7.15966e-069	263.345	142	1	145	315	459	144	144	99.3	100	145	k__Fungi	p__Ascomycota	c__Leotiomycetes	o__Helotiales	f__Dermateaceae	g__Xenochalara	s__Xenochalara_sp
OTU292	SINGLETON|n=1	0	1	0	UDB03608770	SH1012176.10FU	1.20484e-056	222.718	120	1	144	317	460	136	136	94.4	100	144	k__Fungi	p__Ascomycota	c__Leotiomycetes	o__Helotiales	f__Helotiales_fam_Incertae_sedis	g__Infundichalara	s__Infundichalara_sp
OTU293	SINGLETON|n=1	0	1	0	UDB02314272	SH1012259.10FU	1.53887e-070	268.884	145	1	145	317	461	145	145	100	100	145	k__Fungi	p__Ascomycota	c__Leotiomycetes	o__Helotiales	f__Pezizellaceae	g__Ciliolarina	s__Ciliolarina_sp
OTU294	SINGLETON|n=1	0	1	0	UDB05110292	SH1015336.10FU	7.08828e-064	246.725	133	1	136	311	446	135	135	99.3	95.1	143	k__Fungi	p__Ascomycota	c__Dothideomycetes	o__Mycosphaerellales	f__Teratosphaeriaceae	g__Devriesia	s__Devriesia_sp
OTU295	SINGLETON|n=1	1	0	0	MT872626	SH0912803.10FU	2.10672e-064	248.571	134	1	151	1577	1729	147	147	97.4	100	151	k__Fungi	p__Ascomycota	c__Eurotiomycetes	o__Eurotiomycetes_ord_Incertae_sedis	f__Eurotiomycetes_fam_Incertae_sedis	g__Eurotiomycetes_gen_Incertae_sedis	s__Eurotiomycetes_sp
OTU296	SINGLETON|n=1	0	1	0	EU030275	SH0828639.10FU	1.7862e-065	252.265	136	1	160	334	493	152	152	95	98.2	163	k__Fungi	p__Ascomycota	c__Eurotiomycetes	o__Chaetothyriales	f__Herpotrichiellaceae	g__Sorocybe	s__Sorocybe_resinae
OTU297	SINGLETON|n=1	1	0	0	MT872624	SH0912804.10FU	9.88068e-063	243.031	131	1	152	578	729	145	145	95.4	100	152	k__Fungi	p__Ascomycota	c__Eurotiomycetes	o__Eurotiomycetes_ord_Incertae_sedis	f__Eurotiomycetes_fam_Incertae_sedis	g__Eurotiomycetes_gen_Incertae_sedis	s__Eurotiomycetes_sp
OTU298	SINGLETON|n=1	0	1	0															k_	p_	c_	o_	f_	g_	s_
OTU299	SINGLETON|n=1	0	1	0	EU030275	SH0828639.10FU	1.7862e-065	252.265	136	1	160	334	493	152	152	95	98.2	163	k__Fungi	p__Ascomycota	c__Eurotiomycetes	o__Chaetothyriales	f__Herpotrichiellaceae	g__Sorocybe	s__Sorocybe_resinae
OTU300	SINGLETON|n=1	1	0	0	OR623243	SH0958738.10FU	3.07699e-068	261.498	141	1	168	289	451	160	160	95.2	100	168	k__Fungi	p__Ascomycota	c__Saccharomycetes	o__Saccharomycetales	f__Trichomonascaceae	g__Blastobotrys	s__Blastobotrys_sp
OTU301	SINGLETON|n=1	0	1	0	FM173097	SH0974823.10FU	1.29234e-077	292.891	158	1	188	359	546	180	180	95.7	96.9	194	k__Fungi	p__Ascomycota	c__Eurotiomycetes	o__Chaetothyriales	f__Herpotrichiellaceae	g__Exophiala	s__Exophiala_sp
OTU302	SINGLETON|n=1	0	1	0	OR091314	SH0801460.10FU	4.89328e-066	254.111	137	1	143	347	489	141	141	98.6	88.8	161	k__Fungi	p__Ascomycota	c__Eurotiomycetes	o__Phaeomoniellales	f__Celotheliaceae	g__Phaeomoniella	s__Phaeomoniella_sp
OTU303	SINGLETON|n=1	0	1	0	OP437840	SH0801479.10FU	1.74869e-080	302.124	163	1	163	364	526	163	163	100	100	163	k__Fungi	p__Ascomycota	c__Eurotiomycetes	o__Phaeomoniellales	f__Celotheliaceae	g__Neophaeomoniella	s__Neophaeomoniella_zymoides
OTU304	SINGLETON|n=1	0	1	0	OR387067	SH0974819.10FU	1.4546e-092	342.75	185	1	219	363	580	208	208	95	100	219	k__Fungi	p__Ascomycota	c__Eurotiomycetes	o__Chaetothyriales	f__Herpotrichiellaceae	g__Exophiala	s__Exophiala_dermatitidis
OTU305	SINGLETON|n=1	1	0	0	EU030275	SH0828639.10FU	1.7862e-065	252.265	136	1	160	334	493	152	152	95	98.2	163	k__Fungi	p__Ascomycota	c__Eurotiomycetes	o__Chaetothyriales	f__Herpotrichiellaceae	g__Sorocybe	s__Sorocybe_resinae
OTU306	SINGLETON|n=1	0	1	0	EU030275	SH0828639.10FU	1.7862e-065	252.265	136	1	160	334	493	152	152	95	98.2	163	k__Fungi	p__Ascomycota	c__Eurotiomycetes	o__Chaetothyriales	f__Herpotrichiellaceae	g__Sorocybe	s__Sorocybe_resinae
OTU307	SINGLETON|n=1	0	1	0	MK782435	SH0905449.10FU	1.83874e-065	252.265	136	1	167	771	935	157	157	94	100	167	k__Fungi	p__Ascomycota	c__Leotiomycetes	o__Helotiales	f__Mollisiaceae	g__Phialocephala	s__Phialocephala_fluminis
OTU308	SINGLETON|n=1	1	0	0	FJ235127	SH0892767.10FU	1.27418e-087	326.131	176	1	194	407	600	188	188	96.9	100	194	k__Fungi	p__Ascomycota	c__Saccharomycetes	o__Saccharomycetales	f__Saccharomycetales_fam_Incertae_sedis	g__Candida	s__Candida_keroseneae
OTU309	SINGLETON|n=1	0	1	0	MZ016906	SH0976523.10FU	4.06138e-087	324.284	175	1	175	885	1059	175	175	100	100	175	k__Fungi	p__Fungi_phy_Incertae_sedis	c__Fungi_cls_Incertae_sedis	o__Fungi_ord_Incertae_sedis	f__Fungi_fam_Incertae_sedis	g__Fungi_gen_Incertae_sedis	s__Fungi_sp
OTU310	SINGLETON|n=1	0	1	0	GU062229	SH0926075.10FU	1.04746e-099	366.757	198	1	256	308	561	237	237	92.6	98.5	260	k__Fungi	p__Basidiomycota	c__Basidiomycota_cls_Incertae_sedis	o__Basidiomycota_ord_Incertae_sedis	f__Basidiomycota_fam_Incertae_sedis	g__Basidiomycota_gen_Incertae_sedis	s__Basidiomycota_sp
OTU311	SINGLETON|n=1	0	1	0	OQ734577	SH1006583.10FU	5.78065e-091	337.211	182	1	191	407	598	189	189	99	100	191	k__Fungi	p__Mucoromycota	c__Mucoromycetes	o__Mucorales	f__Syncephalastraceae	g__Syncephalastrum	s__Syncephalastrum_racemosum
OTU312	SINGLETON|n=1	0	1	0	UDB07537072	SH0965020.10FU	1.55824e-091	339.057	183	1	186	371	556	185	185	99.5	100	186	k__Fungi	p__Basidiomycota	c__Agaricomycetes	o__Hymenochaetales	f__Schizoporaceae	g__Xylodon	s__Xylodon_sp
OTU313	SINGLETON|n=1	1	0	0	UDB05110292	SH1015336.10FU	4.33337e-056	220.872	119	1	144	311	453	136	136	94.4	100	144	k__Fungi	p__Ascomycota	c__Dothideomycetes	o__Mycosphaerellales	f__Teratosphaeriaceae	g__Devriesia	s__Devriesia_sp
OTU314	SINGLETON|n=1	0	1	0	OP470296	SH0937368.10FU	8.86916e-068	259.651	140	1	140	310	449	140	140	100	100	140	k__Fungi	p__Basidiomycota	c__Tremellomycetes	o__Tremellales	f__Bulleribasidiaceae	g__Vishniacozyma	s__Vishniacozyma_sp
OTU315	SINGLETON|n=1	1	0	0	LC646545	SH0946018.10FU	1.93347e-059	231.952	125	1	140	344	483	135	135	96.4	100	140	k__Fungi	p__Ascomycota	c__Leotiomycetes	o__Helotiales	f__Amorphothecaceae	g__Amorphotheca	s__Amorphotheca_resinae
OTU316	SINGLETON|n=1	1	0	0	LC639279	SH0946103.10FU	1.15544e-061	239.338	129	1	135	370	504	133	133	98.5	96.4	140	k__Fungi	p__Ascomycota	c__Leotiomycetes	o__Helotiales	f__Myxotrichaceae	g__Oidiodendron	s__Oidiodendron_griseum
OTU317	SINGLETON|n=1	0	1	0															k_	p_	c_	o_	f_	g_	s_
OTU318	SINGLETON|n=1	1	0	0	OK584507	SH1012176.10FU	7.21049e-064	246.725	133	1	145	381	525	141	141	97.2	100	145	k__Fungi	p__Ascomycota	c__Leotiomycetes	o__Helotiales	f__Helotiales_fam_Incertae_sedis	g__Infundichalara	s__Infundichalara_sp
OTU319	SINGLETON|n=1	0	1	0	GU062229	SH0926075.10FU	2.15679e-116	422.156	228	1	251	308	561	246	246	98	98.4	255	k__Fungi	p__Basidiomycota	c__Basidiomycota_cls_Incertae_sedis	o__Basidiomycota_ord_Incertae_sedis	f__Basidiomycota_fam_Incertae_sedis	g__Basidiomycota_gen_Incertae_sedis	s__Basidiomycota_sp
OTU320	SINGLETON|n=1	0	1	0	GU062229	SH0926075.10FU	1.00346e-114	416.616	225	1	251	308	561	245	245	97.6	98.4	255	k__Fungi	p__Basidiomycota	c__Basidiomycota_cls_Incertae_sedis	o__Basidiomycota_ord_Incertae_sedis	f__Basidiomycota_fam_Incertae_sedis	g__Basidiomycota_gen_Incertae_sedis	s__Basidiomycota_sp
OTU321	SINGLETON|n=1	0	1	0	GU062215	SH0926075.10FU	7.80959e-086	320.591	173	1	222	409	628	208	208	93.7	89.9	247	k__Fungi	p__Basidiomycota	c__Basidiomycota_cls_Incertae_sedis	o__Basidiomycota_ord_Incertae_sedis	f__Basidiomycota_fam_Incertae_sedis	g__Basidiomycota_gen_Incertae_sedis	s__Basidiomycota_sp
OTU322	SINGLETON|n=1	0	1	0	GU062229	SH0926075.10FU	3.64651e-119	431.39	233	1	255	308	561	248	248	97.3	98.5	259	k__Fungi	p__Basidiomycota	c__Basidiomycota_cls_Incertae_sedis	o__Basidiomycota_ord_Incertae_sedis	f__Basidiomycota_fam_Incertae_sedis	g__Basidiomycota_gen_Incertae_sedis	s__Basidiomycota_sp
OTU323	SINGLETON|n=1	0	1	0	GU062229	SH0926075.10FU	7.8933e-116	420.31	227	1	255	308	561	246	246	96.5	98.5	259	k__Fungi	p__Basidiomycota	c__Basidiomycota_cls_Incertae_sedis	o__Basidiomycota_ord_Incertae_sedis	f__Basidiomycota_fam_Incertae_sedis	g__Basidiomycota_gen_Incertae_sedis	s__Basidiomycota_sp
OTU324	SINGLETON|n=1	0	1	0	GU062229	SH0926075.10FU	2.21021e-111	405.537	219	1	253	308	559	242	242	95.7	97.7	259	k__Fungi	p__Basidiomycota	c__Basidiomycota_cls_Incertae_sedis	o__Basidiomycota_ord_Incertae_sedis	f__Basidiomycota_fam_Incertae_sedis	g__Basidiomycota_gen_Incertae_sedis	s__Basidiomycota_sp
OTU325	SINGLETON|n=1	0	1	0	GU062229	SH0926075.10FU	7.85928e-116	420.31	227	1	254	308	561	245	245	96.5	98.4	258	k__Fungi	p__Basidiomycota	c__Basidiomycota_cls_Incertae_sedis	o__Basidiomycota_ord_Incertae_sedis	f__Basidiomycota_fam_Incertae_sedis	g__Basidiomycota_gen_Incertae_sedis	s__Basidiomycota_sp
OTU326	SINGLETON|n=1	0	1	0	GU062229	SH0926075.10FU	4.87336e-098	361.217	195	1	256	308	561	236	236	92.2	98.5	260	k__Fungi	p__Basidiomycota	c__Basidiomycota_cls_Incertae_sedis	o__Basidiomycota_ord_Incertae_sedis	f__Basidiomycota_fam_Incertae_sedis	g__Basidiomycota_gen_Incertae_sedis	s__Basidiomycota_sp
OTU327	SINGLETON|n=1	0	1	0	OK050801	SH0877606.10FU	2.40349e-065	252.265	136	1	203	319	519	181	181	89.2	96.7	210	k__Fungi	p__Basidiomycota	c__Microbotryomycetes	o__Sporidiobolales	f__Sporidiobolaceae	g__Rhodosporidiobolus	s__Rhodosporidiobolus_poonsookiae
OTU328	SINGLETON|n=1	0	1	0	HQ211632	SH0934667.10FU	1.74942e-081	305.817	165	1	174	373	546	171	171	98.3	85.7	203	k__Fungi	p__Basidiomycota	c__Exobasidiomycetes	o__Exobasidiales	f__Exobasidiaceae	g__Exobasidiaceae_gen_Incertae_sedis	s__Exobasidiaceae_sp
OTU329	SINGLETON|n=1	0	1	0	MN071391	SH1043354.10FU	2.43736e-100	368.604	199	3	222	299	518	213	213	96.8	99.1	222	k__Fungi	p__Fungi_phy_Incertae_sedis	c__Fungi_cls_Incertae_sedis	o__Fungi_ord_Incertae_sedis	f__Fungi_fam_Incertae_sedis	g__Fungi_gen_Incertae_sedis	s__Fungi_sp
OTU330	SINGLETON|n=1	1	0	0	MT813950	SH0950131.10FU	2.92164e-058	228.258	123	3	156	219	371	144	144	93.5	96.9	159	k__Fungi	p__Ascomycota	c__Xylonomycetes	o__Symbiotaphrinales	f__Symbiotaphrinaceae	g__Symbiotaphrina	s__Symbiotaphrina_microtheca
OTU331	SINGLETON|n=1	0	1	0															k_	p_	c_	o_	f_	g_	s_
OTU332	SINGLETON|n=1	0	1	0	UDB07546702	SH0993541.10FU	6.26469e-076	287.351	155	1	201	309	514	190	190	94.5	100	201	k__Fungi	p__Basidiomycota	c__Microbotryomycetes	o__Sporidiobolales	f__Sporidiobolaceae	g__Sporidiobolaceae_gen_Incertae_sedis	s__Sporidiobolaceae_sp
OTU333	SINGLETON|n=1	0	1	0	MT872624	SH0912804.10FU	9.88068e-063	243.031	131	1	152	578	729	145	145	95.4	100	152	k__Fungi	p__Ascomycota	c__Eurotiomycetes	o__Eurotiomycetes_ord_Incertae_sedis	f__Eurotiomycetes_fam_Incertae_sedis	g__Eurotiomycetes_gen_Incertae_sedis	s__Eurotiomycetes_sp
OTU334	SINGLETON|n=1	0	1	0	PP115452	SH0911881.10FU	1.40914e-092	342.75	185	1	212	308	519	203	203	95.8	99.5	213	k__Fungi	p__Basidiomycota	c__Microbotryomycetes	o__Sporidiobolales	f__Sporidiobolaceae	g__Sporobolomyces	s__Sporobolomyces_salmonicolor
OTU335	SINGLETON|n=1	0	1	0	KX148023	SH0938147.10FU	7.46304e-069	263.345	142	1	150	321	472	149	149	99.3	100	150	k__Fungi	p__Ascomycota	c__Dothideomycetes	o__Mycosphaerellales	f__Teratosphaeriaceae	g__Constantinomyces	s__Constantinomyces_sp
OTU336	SINGLETON|n=1	0	1	0	UDB02410273	SH0971208.10FU	3.47559e-093	344.597	186	1	192	317	508	190	190	99	100	192	k__Fungi	p__Basidiomycota	c__Agaricomycetes	o__Cantharellales	f__Oliveoniaceae	g__Oliveonia	s__Oliveonia_sp
OTU337	SINGLETON|n=1	0	1	0	EU030275	SH0828639.10FU	1.79888e-060	235.645	127	1	160	334	493	149	149	93.1	98.2	163	k__Fungi	p__Ascomycota	c__Eurotiomycetes	o__Chaetothyriales	f__Herpotrichiellaceae	g__Sorocybe	s__Sorocybe_resinae
OTU338	SINGLETON|n=1	0	1	0	MH188916	SH0926074.10FU	9.39568e-100	366.757	198	1	236	347	584	226	226	95.8	100	236	k__Fungi	p__Basidiomycota	c__Exobasidiomycetes	o__Exobasidiales	f__Exobasidiales_fam_Incertae_sedis	g__Guomyces	s__Guomyces_nicotianae
OTU339	SINGLETON|n=1	0	1	0	KY103886	SH0880181.10FU	1.86508e-071	272.578	147	1	212	368	581	193	193	91	100	212	k__Fungi	p__Basidiomycota	c__Agaricostilbomycetes	o__Agaricostilbales	f__Kondoaceae	g__Kondoa	s__Kondoa_phyllada
OTU340	SINGLETON|n=1	0	0	1	MH861711	SH0901488.10FU	1.08329e-072	276.271	149	1	165	897	1059	160	160	97	99.4	166	k__Fungi	p__Ascomycota	c__Eurotiomycetes	o__Eurotiales	f__Trichocomaceae	g__Talaromyces	s__Talaromyces_rademirici
OTU341	SINGLETON|n=1	0	0	1															k_	p_	c_	o_	f_	g_	s_
OTU342	SINGLETON|n=1	0	0	1	OR069551	SH0767731.10FU	3.81213e-072	274.424	148	1	163	331	493	158	158	96.9	100	163	k__Fungi	p__Ascomycota	c__Eurotiomycetes	o__Eurotiales	f__Aspergillaceae	g__Penicillium	s__Penicillium_corylophilum
OTU343	SINGLETON|n=1	0	0	1	OQ718080	SH0738016.10FU	1.27929e-066	255.958	138	1	153	373	525	148	148	96.7	100	153	k__Fungi	p__Ascomycota	c__Sareomycetes	o__Sareales	f__Sareaceae	g__Sarea	s__Sarea_coeloplata
OTU344	SINGLETON|n=1	0	0	1	MK782435	SH0905449.10FU	1.39125e-071	272.578	147	1	165	771	935	159	159	96.4	100	165	k__Fungi	p__Ascomycota	c__Leotiomycetes	o__Helotiales	f__Mollisiaceae	g__Phialocephala	s__Phialocephala_fluminis
OTU345	SINGLETON|n=1	0	0	1	LC646009	SH0924986.10FU	1.00536e-072	276.271	149	1	155	322	476	153	153	98.7	99.4	156	k__Fungi	p__Ascomycota	c__Dothideomycetes	o__Mytilinidiales	f__Mytilinidiaceae	g__Lophium	s__Lophium_arboricola
OTU346	SINGLETON|n=1	0	1	0	OM337566	SH0969905.10FU	2.56376e-120	435.083	235	1	238	489	726	237	237	99.6	100	238	k__Fungi	p__Basidiomycota	c__Exobasidiomycetes	o__Microstromatales	f__Microstromatales_fam_Incertae_sedis	g__Pseudomicrostroma	s__Pseudomicrostroma_glucosiphilum
OTU347	SINGLETON|n=1	0	0	1	MG520949	SH0740652.10FU	2.73027e-073	278.118	150	1	153	410	562	152	152	99.3	100	153	k__Fungi	p__Ascomycota	c__Dothideomycetes	o__Pleosporales	f__Phaeosphaeriaceae	g__Pseudoophiobolus	s__Pseudoophiobolus_mathieui
OTU348	SINGLETON|n=1	0	0	1	UDB04470396	SH0966602.10FU	2.55325e-068	261.498	141	1	144	326	469	143	143	99.3	100	144	k__Fungi	p__Ascomycota	c__Leotiomycetes	o__Helotiales	f__Dermateaceae	g__Cryptosporiopsis	s__Cryptosporiopsis_sp
OTU349	SINGLETON|n=1	0	0	1	LC272919	SH0915560.10FU	1.77307e-065	252.265	136	1	162	362	525	155	155	95.7	100	162	k__Fungi	p__Ascomycota	c__Dothideomycetes	o__Myriangiales	f__Myriangiales_fam_Incertae_sedis	g__Myriangiales_gen_Incertae_sedis	s__Myriangiales_sp
OTU350	SINGLETON|n=1	0	0	1	MT813950	SH0950131.10FU	4.78373e-066	254.111	137	1	153	217	368	148	148	96.7	96.8	158	k__Fungi	p__Ascomycota	c__Xylonomycetes	o__Symbiotaphrinales	f__Symbiotaphrinaceae	g__Symbiotaphrina	s__Symbiotaphrina_microtheca
OTU351	SINGLETON|n=1	0	0	1	OR069551	SH0767731.10FU	2.94696e-073	278.118	150	1	162	331	492	158	158	97.5	99.4	163	k__Fungi	p__Ascomycota	c__Eurotiomycetes	o__Eurotiales	f__Aspergillaceae	g__Penicillium	s__Penicillium_corylophilum
OTU352	SINGLETON|n=1	0	0	1	OR069551	SH0767731.10FU	3.81213e-072	274.424	148	1	163	331	493	158	158	96.9	100	163	k__Fungi	p__Ascomycota	c__Eurotiomycetes	o__Eurotiales	f__Aspergillaceae	g__Penicillium	s__Penicillium_corylophilum
OTU353	SINGLETON|n=1	0	0	1	UDB04294304	SH0970640.10FU	1.34431e-032	143.312	77	1	183	308	483	149	149	81.4	96.3	190	k__Fungi	p__Ascomycota	c__Sordariomycetes	o__Microascales	f__Microascaceae	g__Petriellopsis	s__Petriellopsis_sp
OTU354	SINGLETON|n=1	0	0	1	UDB05051204	SH0887078.10FU	1.61865e-086	322.437	174	1	191	358	550	187	187	97.9	100	191	k__Fungi	p__Ascomycota	c__Saccharomycetes	o__Saccharomycetales	f__Debaryomycetaceae	g__Debaryomyces	s__Debaryomyces_sp
OTU355	SINGLETON|n=1	0	0	1	UDB07674985	SH1012176.10FU	1.19634e-061	239.338	129	1	144	315	458	139	139	96.5	100	144	k__Fungi	p__Ascomycota	c__Leotiomycetes	o__Helotiales	f__Pezizellaceae	g__Ciliolarina	s__Ciliolarina_sp
OTU356	SINGLETON|n=1	0	0	1	FJ235127	SH0892767.10FU	6.01266e-076	287.351	155	1	191	407	597	179	179	93.7	98.5	194	k__Fungi	p__Ascomycota	c__Saccharomycetes	o__Saccharomycetales	f__Saccharomycetales_fam_Incertae_sedis	g__Candida	s__Candida_keroseneae
OTU357	SINGLETON|n=1	0	0	1	UDB01625522	SH0976908.10FU	2.73041e-074	281.811	152	1	190	350	542	180	180	94.7	100	190	k__Fungi	p__Ascomycota	c__Eurotiomycetes	o__Chaetothyriales	f__Herpotrichiellaceae	g__Capronia	s__Capronia_sp
OTU358	SINGLETON|n=1	0	0	1	MW724320	SH0986904.10FU	6.52305e-031	137.772	74	1	148	407	551	128	128	86.5	75.1	197	k__Fungi	p__Ascomycota	c__Eurotiomycetes	o__Chaetothyriales	f__Herpotrichiellaceae	g__Exophiala	s__Exophiala_sp
OTU359	SINGLETON|n=1	0	0	1	MT872626	SH0912803.10FU	5.90472e-065	250.418	135	1	148	1577	1723	144	144	97.3	97.4	152	k__Fungi	p__Ascomycota	c__Eurotiomycetes	o__Eurotiomycetes_ord_Incertae_sedis	f__Eurotiomycetes_fam_Incertae_sedis	g__Eurotiomycetes_gen_Incertae_sedis	s__Eurotiomycetes_sp
OTU360	SINGLETON|n=1	0	0	1	MT872624	SH0912804.10FU	7.78664e-039	163.625	88	1	115	578	693	107	107	93	76.7	150	k__Fungi	p__Ascomycota	c__Eurotiomycetes	o__Eurotiomycetes_ord_Incertae_sedis	f__Eurotiomycetes_fam_Incertae_sedis	g__Eurotiomycetes_gen_Incertae_sedis	s__Eurotiomycetes_sp
OTU361	SINGLETON|n=1	0	0	1	MT872624	SH0912804.10FU	1.02162e-027	126.692	68	1	122	578	700	105	105	86.1	81.3	150	k__Fungi	p__Ascomycota	c__Eurotiomycetes	o__Eurotiomycetes_ord_Incertae_sedis	f__Eurotiomycetes_fam_Incertae_sedis	g__Eurotiomycetes_gen_Incertae_sedis	s__Eurotiomycetes_sp
OTU362	SINGLETON|n=1	0	0	1	UDB0207502	SH0840832.10FU	2.37351e-070	268.884	145	1	209	323	530	190	190	90.9	100	209	k__Fungi	p__Basidiomycota	c__Microbotryomycetes	o__Sporidiobolales	f__Sporidiobolaceae	g__Rhodotorula	s__Rhodotorula_sp
OTU363	SINGLETON|n=1	0	0	1	MT872624	SH0912804.10FU	3.49686e-062	241.185	130	1	150	578	729	145	145	96.7	100	150	k__Fungi	p__Ascomycota	c__Eurotiomycetes	o__Eurotiomycetes_ord_Incertae_sedis	f__Eurotiomycetes_fam_Incertae_sedis	g__Eurotiomycetes_gen_Incertae_sedis	s__Eurotiomycetes_sp
OTU364	SINGLETON|n=1	0	0	1	OP941495	SH0953911.10FU	5.48055e-102	374.144	202	2	231	309	537	221	221	96.1	99.6	231	k__Fungi	p__Basidiomycota	c__Tremellomycetes	o__Filobasidiales	f__Piskurozymaceae	g__Solicoccozyma	s__Solicoccozyma_sp
OTU365	SINGLETON|n=1	0	0	1	GU062229	SH0926075.10FU	8.02786e-101	370.45	200	1	254	308	561	238	238	93.7	98.4	258	k__Fungi	p__Basidiomycota	c__Basidiomycota_cls_Incertae_sedis	o__Basidiomycota_ord_Incertae_sedis	f__Basidiomycota_fam_Incertae_sedis	g__Basidiomycota_gen_Incertae_sedis	s__Basidiomycota_sp
OTU366	SINGLETON|n=1	0	0	1	GU062229	SH0926075.10FU	7.94934e-111	403.69	218	1	255	308	561	243	243	95.3	98.5	259	k__Fungi	p__Basidiomycota	c__Basidiomycota_cls_Incertae_sedis	o__Basidiomycota_ord_Incertae_sedis	f__Basidiomycota_fam_Incertae_sedis	g__Basidiomycota_gen_Incertae_sedis	s__Basidiomycota_sp
OTU367	SINGLETON|n=1	0	0	1	GU062229	SH0926075.10FU	7.91508e-111	403.69	218	1	254	308	561	242	242	95.3	98.4	258	k__Fungi	p__Basidiomycota	c__Basidiomycota_cls_Incertae_sedis	o__Basidiomycota_ord_Incertae_sedis	f__Basidiomycota_fam_Incertae_sedis	g__Basidiomycota_gen_Incertae_sedis	s__Basidiomycota_sp
OTU368	SINGLETON|n=1	0	0	1	GU062229	SH0926075.10FU	3.68253e-109	398.15	215	1	254	308	561	241	241	94.9	98.4	258	k__Fungi	p__Basidiomycota	c__Basidiomycota_cls_Incertae_sedis	o__Basidiomycota_ord_Incertae_sedis	f__Basidiomycota_fam_Incertae_sedis	g__Basidiomycota_gen_Incertae_sedis	s__Basidiomycota_sp
OTU369	SINGLETON|n=1	0	0	1	GU062229	SH0926075.10FU	3.64651e-119	431.39	233	1	255	308	561	248	248	97.3	98.5	259	k__Fungi	p__Basidiomycota	c__Basidiomycota_cls_Incertae_sedis	o__Basidiomycota_ord_Incertae_sedis	f__Basidiomycota_fam_Incertae_sedis	g__Basidiomycota_gen_Incertae_sedis	s__Basidiomycota_sp
OTU370	SINGLETON|n=1	0	0	1	MN071391	SH1043354.10FU	8.7663e-100	366.757	198	1	222	297	518	214	214	96.4	100	222	k__Fungi	p__Fungi_phy_Incertae_sedis	c__Fungi_cls_Incertae_sedis	o__Fungi_ord_Incertae_sedis	f__Fungi_fam_Incertae_sedis	g__Fungi_gen_Incertae_sedis	s__Fungi_sp
OTU371	SINGLETON|n=1	0	0	1	MN071391	SH1043354.10FU	4.10752e-093	344.597	186	1	222	297	518	210	210	94.6	100	222	k__Fungi	p__Fungi_phy_Incertae_sedis	c__Fungi_cls_Incertae_sedis	o__Fungi_ord_Incertae_sedis	f__Fungi_fam_Incertae_sedis	g__Fungi_gen_Incertae_sedis	s__Fungi_sp
OTU372	SINGLETON|n=1	0	0	1	UDB02746397	SH0960482.10FU	8.93213e-063	243.031	131	1	140	301	440	137	137	97.9	100	140	k__Fungi	p__Ascomycota	c__Lecanoromycetes	o__Lecanoromycetes_ord_Incertae_sedis	f__Lecanoromycetes_fam_Incertae_sedis	g__Lecanoromycetes_gen_Incertae_sedis	s__Lecanoromycetes_sp
OTU373	SINGLETON|n=1	0	0	1	GU062229	SH0926075.10FU	1.31301e-108	396.303	214	1	252	308	561	241	241	95.6	98.4	256	k__Fungi	p__Basidiomycota	c__Basidiomycota_cls_Incertae_sedis	o__Basidiomycota_ord_Incertae_sedis	f__Basidiomycota_fam_Incertae_sedis	g__Basidiomycota_gen_Incertae_sedis	s__Basidiomycota_sp
OTU374	SINGLETON|n=1	0	1	0	OR069551	SH0767731.10FU	3.81213e-072	274.424	148	1	163	331	493	158	158	96.9	100	163	k__Fungi	p__Ascomycota	c__Eurotiomycetes	o__Eurotiales	f__Aspergillaceae	g__Penicillium	s__Penicillium_corylophilum
OTU375	SINGLETON|n=1	0	0	1	MH188916	SH0926074.10FU	2.61876e-105	385.223	208	1	238	347	585	230	230	96.6	100	238	k__Fungi	p__Basidiomycota	c__Exobasidiomycetes	o__Exobasidiales	f__Exobasidiales_fam_Incertae_sedis	g__Guomyces	s__Guomyces_nicotianae
OTU376	SINGLETON|n=1	0	0	1	MK584975	SH0908381.10FU	4.48152e-056	220.872	119	1	140	429	568	133	133	95	94.6	148	k__Fungi	p__Ascomycota	c__Leotiomycetes	o__Helotiales	f__Hyaloscyphaceae	g__Scolecolachnum	s__Scolecolachnum_nigricans
OTU377	SINGLETON|n=1	0	0	1	UDB06512388	SH0980336.10FU	3.34921e-093	344.597	186	1	186	351	536	186	186	100	100	186	k__Fungi	p__Mucoromycota	c__Mucoromycetes	o__Mucorales	f__Rhizopodaceae	g__Rhizopus	s__Rhizopus_sp
OTU378	SINGLETON|n=1	0	1	0	OR803414	SH0925964.10FU	7.65141e-074	279.964	151	1	154	368	521	153	153	99.4	100	154	k__Fungi	p__Ascomycota	c__Dothideomycetes	o__Dothideales	f__Saccotheciaceae	g__Aureobasidium	s__Aureobasidium_sp
OTU379	SINGLETON|n=1	0	0	1	MK782435	SH0905449.10FU	2.31164e-074	281.811	152	8	165	778	935	156	156	98.7	95.8	165	k__Fungi	p__Ascomycota	c__Leotiomycetes	o__Helotiales	f__Mollisiaceae	g__Phialocephala	s__Phialocephala_fluminis
OTU380	SINGLETON|n=1	0	0	1	FJ897698	SH0882528.10FU	1.38144e-076	289.198	156	1	162	160	321	160	160	98.8	98.2	165	k__Fungi	p__Ascomycota	c__Eurotiomycetes	o__Onygenales	f__Ajellomycetaceae	g__Histoplasma	s__Histoplasma_capsulatum
OTU381	SINGLETON|n=1	0	0	1	MT809296	SH0737869.10FU	4.56462e-066	254.111	137	1	152	352	503	147	147	96.7	100	152	k__Fungi	p__Ascomycota	c__Sareomycetes	o__Sareales	f__Sareaceae	g__Sarea	s__Sarea_sp
OTU382	SINGLETON|n=1	0	0	1	UDB07650033	SH0948279.10FU	9.60019e-059	230.105	124	1	171	291	452	157	157	91.8	93.4	183	k__Fungi	p__Ascomycota	c__Saccharomycetes	o__Saccharomycetales	f__Trichomonascaceae	g__Sugiyamaella	s__Sugiyamaella_sp
OTU383	SINGLETON|n=1	0	0	1	UDB03955738	SH0939707.10FU	6.56604e-065	250.418	135	2	166	327	492	156	156	94.5	99.4	166	k__Fungi	p__Ascomycota	c__Eurotiomycetes	o__Eurotiales	f__Aspergillaceae	g__Penicillium	s__Penicillium_sp
OTU384	SINGLETON|n=1	0	0	1	AY795853	SH0838720.10FU	1.22594e-057	226.412	122	1	177	326	500	160	160	90.4	97.8	181	k__Fungi	p__Ascomycota	c__Eurotiomycetes	o__Mycocaliciales	f__Mycocaliciaceae	g__Chaenothecopsis	s__Chaenothecopsis_debilis
OTU385	SINGLETON|n=1	0	0	1	UDB07674985	SH1012176.10FU	2.57138e-063	244.878	132	1	144	315	458	140	140	97.2	100	144	k__Fungi	p__Ascomycota	c__Leotiomycetes	o__Helotiales	f__Pezizellaceae	g__Ciliolarina	s__Ciliolarina_sp
OTU386	SINGLETON|n=1	0	0	1	UDB07674985	SH1012176.10FU	1.19634e-061	239.338	129	1	144	315	458	139	139	96.5	100	144	k__Fungi	p__Ascomycota	c__Leotiomycetes	o__Helotiales	f__Pezizellaceae	g__Ciliolarina	s__Ciliolarina_sp
OTU387	SINGLETON|n=1	0	1	0	EU030275	SH0828639.10FU	4.96631e-066	254.111	137	3	160	336	493	151	151	95.6	96.9	163	k__Fungi	p__Ascomycota	c__Eurotiomycetes	o__Chaetothyriales	f__Herpotrichiellaceae	g__Sorocybe	s__Sorocybe_resinae
OTU388	SINGLETON|n=1	0	0	1	OR387067	SH0974819.10FU	3.10442e-099	364.91	197	1	219	363	580	212	212	96.8	100	219	k__Fungi	p__Ascomycota	c__Eurotiomycetes	o__Chaetothyriales	f__Herpotrichiellaceae	g__Exophiala	s__Exophiala_dermatitidis
OTU389	SINGLETON|n=1	0	0	1	UDB0748894	SH0750559.10FU	4.71995e-027	124.846	67	42	181	352	489	117	117	83.6	75.7	185	k__Fungi	p__Fungi_phy_Incertae_sedis	c__Fungi_cls_Incertae_sedis	o__Fungi_ord_Incertae_sedis	f__Fungi_fam_Incertae_sedis	g__Fungi_gen_Incertae_sedis	s__Fungi_sp
OTU390	SINGLETON|n=1	0	0	1															k_	p_	c_	o_	f_	g_	s_
OTU391	SINGLETON|n=1	0	0	1	MT872624	SH0912804.10FU	3.62277e-037	158.086	85	1	150	578	729	130	130	86.7	100	150	k__Fungi	p__Ascomycota	c__Eurotiomycetes	o__Eurotiomycetes_ord_Incertae_sedis	f__Eurotiomycetes_fam_Incertae_sedis	g__Eurotiomycetes_gen_Incertae_sedis	s__Eurotiomycetes_sp
OTU392	SINGLETON|n=1	0	0	1															k_	p_	c_	o_	f_	g_	s_
OTU393	SINGLETON|n=1	0	0	1	MT809264	SH0737869.10FU	6.0256e-045	183.939	99	3	151	354	504	136	136	91.3	98.7	151	k__Fungi	p__Ascomycota	c__Sareomycetes	o__Sareales	f__Sareaceae	g__Sarea	s__Sarea_sp
OTU394	SINGLETON|n=1	1	0	0	MH188916	SH0926074.10FU	2.61876e-105	385.223	208	1	238	347	584	229	229	96.2	100	238	k__Fungi	p__Basidiomycota	c__Exobasidiomycetes	o__Exobasidiales	f__Exobasidiales_fam_Incertae_sedis	g__Guomyces	s__Guomyces_nicotianae
OTU395	SINGLETON|n=1	0	0	1	GU062215	SH0926075.10FU	4.6905e-078	294.738	159	1	219	409	627	201	201	91.8	89.4	245	k__Fungi	p__Basidiomycota	c__Basidiomycota_cls_Incertae_sedis	o__Basidiomycota_ord_Incertae_sedis	f__Basidiomycota_fam_Incertae_sedis	g__Basidiomycota_gen_Incertae_sedis	s__Basidiomycota_sp
OTU396	SINGLETON|n=1	0	0	1	GU062229	SH0926075.10FU	1.69655e-117	425.85	230	1	255	308	561	247	247	96.9	98.5	259	k__Fungi	p__Basidiomycota	c__Basidiomycota_cls_Incertae_sedis	o__Basidiomycota_ord_Incertae_sedis	f__Basidiomycota_fam_Incertae_sedis	g__Basidiomycota_gen_Incertae_sedis	s__Basidiomycota_sp
OTU397	SINGLETON|n=1	0	0	1	GU062229	SH0926075.10FU	7.8933e-116	420.31	227	1	255	308	561	246	246	96.5	98.5	259	k__Fungi	p__Basidiomycota	c__Basidiomycota_cls_Incertae_sedis	o__Basidiomycota_ord_Incertae_sedis	f__Basidiomycota_fam_Incertae_sedis	g__Basidiomycota_gen_Incertae_sedis	s__Basidiomycota_sp
OTU398	SINGLETON|n=1	0	0	1	GU062229	SH0926075.10FU	3.64651e-119	431.39	233	1	255	308	561	248	248	97.3	98.5	259	k__Fungi	p__Basidiomycota	c__Basidiomycota_cls_Incertae_sedis	o__Basidiomycota_ord_Incertae_sedis	f__Basidiomycota_fam_Incertae_sedis	g__Basidiomycota_gen_Incertae_sedis	s__Basidiomycota_sp
OTU399	SINGLETON|n=1	0	0	1	GU062229	SH0926075.10FU	3.64651e-119	431.39	233	1	255	308	561	248	248	97.3	98.5	259	k__Fungi	p__Basidiomycota	c__Basidiomycota_cls_Incertae_sedis	o__Basidiomycota_ord_Incertae_sedis	f__Basidiomycota_fam_Incertae_sedis	g__Basidiomycota_gen_Incertae_sedis	s__Basidiomycota_sp
OTU400	SINGLETON|n=1	0	0	1	MW710094	SH0733979.10FU	5.5753e-107	390.763	211	1	236	324	558	228	228	96.6	100	236	k__Fungi	p__Basidiomycota	c__Microbotryomycetes	o__Microbotryomycetes_ord_Incertae_sedis	f__Colacogloeaceae	g__Colacogloea	s__Colacogloea_philyla
OTU401	SINGLETON|n=1	1	0	0	KU582303	SH0870090.10FU	9.08325e-089	329.824	178	1	181	397	577	180	180	99.4	100	181	k__Fungi	p__Ascomycota	c__Eurotiomycetes	o__Chaetothyriales	f__Cyphellophoraceae	g__Cyphellophora	s__Cyphellophora_sp
OTU402	SINGLETON|n=1	0	0	1	MT872624	SH0912804.10FU	7.95367e-024	113.766	61	1	150	578	729	122	122	81.3	100	150	k__Fungi	p__Ascomycota	c__Eurotiomycetes	o__Eurotiomycetes_ord_Incertae_sedis	f__Eurotiomycetes_fam_Incertae_sedis	g__Eurotiomycetes_gen_Incertae_sedis	s__Eurotiomycetes_sp
OTU403	SINGLETON|n=1	0	0	1	OR091314	SH0801460.10FU	6.37904e-070	267.038	144	1	163	347	507	157	157	96.3	100	163	k__Fungi	p__Ascomycota	c__Eurotiomycetes	o__Phaeomoniellales	f__Celotheliaceae	g__Phaeomoniella	s__Phaeomoniella_sp
OTU404	SINGLETON|n=1	0	0	1	OR885026	SH0747765.10FU	1.18262e-087	326.131	176	1	182	415	596	180	180	98.9	100	182	k__Fungi	p__Mucoromycota	c__Mucoromycetes	o__Mucorales	f__Mucoraceae	g__Mucor	s__Mucor_pseudolusitanicus
OTU405	SINGLETON|n=1	0	0	1	UDB03977820	SH0903477.10FU	3.64395e-072	274.424	148	1	156	333	490	155	155	99.4	99.4	157	k__Fungi	p__Ascomycota	c__Eurotiomycetes	o__Eurotiales	f__Aspergillaceae	g__Penicillium	s__Penicillium_sp
OTU406	SINGLETON|n=1	0	0	1	UDB07499237	SH1012135.10FU	7.21049e-064	246.725	133	1	145	317	461	141	141	97.2	100	145	k__Fungi	p__Ascomycota	c__Leotiomycetes	o__Helotiales	f__Pezizellaceae	g__Xenopolyscytalum	s__Xenopolyscytalum_sp
OTU407	SINGLETON|n=1	0	0	1	PP033949	SH0960075.10FU	3.61826e-077	291.044	157	1	157	305	461	157	157	100	100	157	k__Fungi	p__Ascomycota	c__Dothideomycetes	o__Pleosporales	f__Coniothyriaceae	g__Coniothyrium	s__Coniothyrium_telephii
OTU408	SINGLETON|n=1	0	0	1	UDB03126426	SH0966817.10FU	4.38849e-041	171.012	92	1	143	327	469	127	127	88.8	100	143	k__Fungi	p__Ascomycota	c__Leotiomycetes	o__Leotiales	f__Tympanidaceae	g__Claussenomyces	s__Claussenomyces_sp
OTU409	SINGLETON|n=1	0	0	1	MT813950	SH0950131.10FU	3.72628e-067	257.805	139	1	155	217	370	151	151	97.4	97.5	159	k__Fungi	p__Ascomycota	c__Xylonomycetes	o__Symbiotaphrinales	f__Symbiotaphrinaceae	g__Symbiotaphrina	s__Symbiotaphrina_microtheca
OTU410	SINGLETON|n=1	0	0	1	UDB04243828	SH0939727.10FU	2.26139e-074	281.811	152	1	161	332	492	159	159	98.8	99.4	162	k__Fungi	p__Ascomycota	c__Eurotiomycetes	o__Eurotiales	f__Aspergillaceae	g__Penicillium	s__Penicillium_sp
OTU411	SINGLETON|n=1	0	0	1	OQ718080	SH0738016.10FU	7.69934e-064	246.725	133	3	153	374	525	146	146	96.7	98.7	153	k__Fungi	p__Ascomycota	c__Sareomycetes	o__Sareales	f__Sareaceae	g__Sarea	s__Sarea_coeloplata
OTU412	SINGLETON|n=1	0	0	1	UDB02024631	SH0851402.10FU	9.87122e-058	226.412	122	1	150	323	470	141	141	94	99.3	151	k__Fungi	p__Ascomycota	c__Dothideomycetes	o__Mycosphaerellales	f__Neodevriesiaceae	g__Neodevriesia	s__Neodevriesia_sp
OTU413	SINGLETON|n=1	0	0	1	UDB0747127	SH0763677.10FU	3.41575e-067	257.805	139	1	148	323	470	145	145	98	100	148	k__Fungi	p__Ascomycota	c__Dothideomycetes	o__Mycosphaerellales	f__Neodevriesiaceae	g__Neodevriesia	s__Neodevriesia_sp
OTU414	SINGLETON|n=1	0	0	1	AJ972856	SH0983459.10FU	7.02717e-064	246.725	133	1	142	2039	2180	139	139	97.9	100	142	k__Fungi	p__Ascomycota	c__Dothideomycetes	o__Mycosphaerellales	f__Extremaceae	g__Extremaceae_gen_Incertae_sedis	s__Extremaceae_sp
OTU415	SINGLETON|n=1	0	0	1	EU030275	SH0828639.10FU	1.7862e-065	252.265	136	1	160	334	493	152	152	95	98.2	163	k__Fungi	p__Ascomycota	c__Eurotiomycetes	o__Chaetothyriales	f__Herpotrichiellaceae	g__Sorocybe	s__Sorocybe_resinae
OTU416	SINGLETON|n=1	0	0	1	OR387067	SH0974819.10FU	6.71988e-096	353.83	191	1	219	363	580	210	210	95.9	100	219	k__Fungi	p__Ascomycota	c__Eurotiomycetes	o__Chaetothyriales	f__Herpotrichiellaceae	g__Exophiala	s__Exophiala_dermatitidis
OTU417	SINGLETON|n=1	0	0	1	AY156968	SH0974837.10FU	1.25364e-077	292.891	158	1	189	365	557	183	183	96.8	100	189	k__Fungi	p__Ascomycota	c__Eurotiomycetes	o__Chaetothyriales	f__Herpotrichiellaceae	g__Capronia	s__Capronia_epimyces
OTU418	SINGLETON|n=1	0	0	1	MZ016618	SH0976976.10FU	4.17312e-082	307.664	166	1	178	360	537	174	174	97.8	100	178	k__Fungi	p__Fungi_phy_Incertae_sedis	c__Fungi_cls_Incertae_sedis	o__Fungi_ord_Incertae_sedis	f__Fungi_fam_Incertae_sedis	g__Fungi_gen_Incertae_sedis	s__Fungi_sp
OTU419	SINGLETON|n=1	0	0	1	OR036383	SH0945270.10FU	2.55325e-068	261.498	141	1	144	314	457	143	143	99.3	100	144	k__Fungi	p__Ascomycota	c__Leotiomycetes	o__Leotiales	f__Tympanidaceae	g__Pragmopora	s__Pragmopora_sp
OTU420	SINGLETON|n=1	0	0	1															k_	p_	c_	o_	f_	g_	s_
OTU421	SINGLETON|n=1	1	0	0	GU062229	SH0926075.10FU	1.68924e-117	425.85	230	1	254	308	561	246	246	96.9	98.4	258	k__Fungi	p__Basidiomycota	c__Basidiomycota_cls_Incertae_sedis	o__Basidiomycota_ord_Incertae_sedis	f__Basidiomycota_fam_Incertae_sedis	g__Basidiomycota_gen_Incertae_sedis	s__Basidiomycota_sp
OTU422	SINGLETON|n=1	0	0	1															k_	p_	c_	o_	f_	g_	s_
OTU423	SINGLETON|n=1	0	0	1	OR623243	SH0958738.10FU	8.13588e-079	296.584	160	1	163	289	451	162	162	99.4	100	163	k__Fungi	p__Ascomycota	c__Saccharomycetes	o__Saccharomycetales	f__Trichomonascaceae	g__Blastobotrys	s__Blastobotrys_sp
OTU424	SINGLETON|n=1	1	0	0	GU062229	SH0926075.10FU	3.6724e-114	414.77	224	1	255	308	561	245	245	96.1	98.5	259	k__Fungi	p__Basidiomycota	c__Basidiomycota_cls_Incertae_sedis	o__Basidiomycota_ord_Incertae_sedis	f__Basidiomycota_fam_Incertae_sedis	g__Basidiomycota_gen_Incertae_sedis	s__Basidiomycota_sp
OTU425	SINGLETON|n=1	0	0	1															k_	p_	c_	o_	f_	g_	s_
OTU426	SINGLETON|n=1	0	0	1	KU948765	SH0845488.10FU	1.35331e-057	226.412	122	1	182	261	442	164	164	90.1	92.4	197	k__Fungi	p__Basidiomycota	c__Cystobasidiomycetes	o__Cystobasidiomycetes_ord_Incertae_sedis	f__Cystobasidiomycetes_fam_Incertae_sedis	g__Cystobasidiomycetes_gen_Incertae_sedis	s__Cystobasidiomycetes_sp
OTU427	SINGLETON|n=1	1	0	0	GU062229	SH0926075.10FU	1.7086e-112	409.23	221	1	255	308	561	244	244	95.7	98.5	259	k__Fungi	p__Basidiomycota	c__Basidiomycota_cls_Incertae_sedis	o__Basidiomycota_ord_Incertae_sedis	f__Basidiomycota_fam_Incertae_sedis	g__Basidiomycota_gen_Incertae_sedis	s__Basidiomycota_sp
OTU428	SINGLETON|n=1	0	0	1															k_	p_	c_	o_	f_	g_	s_
OTU429	SINGLETON|n=1	0	0	1	GU062229	SH0926075.10FU	1.30413e-078	296.584	160	1	235	308	548	218	218	92.8	95.9	245	k__Fungi	p__Basidiomycota	c__Basidiomycota_cls_Incertae_sedis	o__Basidiomycota_ord_Incertae_sedis	f__Basidiomycota_fam_Incertae_sedis	g__Basidiomycota_gen_Incertae_sedis	s__Basidiomycota_sp
OTU430	SINGLETON|n=1	0	0	1	GU062229	SH0926075.10FU	3.64651e-119	431.39	233	1	255	308	561	248	248	97.3	98.5	259	k__Fungi	p__Basidiomycota	c__Basidiomycota_cls_Incertae_sedis	o__Basidiomycota_ord_Incertae_sedis	f__Basidiomycota_fam_Incertae_sedis	g__Basidiomycota_gen_Incertae_sedis	s__Basidiomycota_sp
OTU431	SINGLETON|n=1	0	0	1	GU062229	SH0926075.10FU	1.68924e-117	425.85	230	1	254	308	561	246	246	96.9	98.4	258	k__Fungi	p__Basidiomycota	c__Basidiomycota_cls_Incertae_sedis	o__Basidiomycota_ord_Incertae_sedis	f__Basidiomycota_fam_Incertae_sedis	g__Basidiomycota_gen_Incertae_sedis	s__Basidiomycota_sp
OTU432	SINGLETON|n=1	0	0	1	GU062229	SH0926075.10FU	4.63573e-118	427.696	231	1	251	308	561	247	247	98.4	98.4	255	k__Fungi	p__Basidiomycota	c__Basidiomycota_cls_Incertae_sedis	o__Basidiomycota_ord_Incertae_sedis	f__Basidiomycota_fam_Incertae_sedis	g__Basidiomycota_gen_Incertae_sedis	s__Basidiomycota_sp
OTU433	SINGLETON|n=1	0	0	1	UDB07673531	SH1004753.10FU	1.95232e-090	335.364	181	1	181	404	584	181	181	100	100	181	k__Fungi	p__Basidiomycota	c__Agaricomycetes	o__Hymenochaetales	f__Schizoporaceae	g__Hyphodontia	s__Hyphodontia_subalutacea
OTU434	SINGLETON|n=1	0	0	1	AM901832	SH0934681.10FU	1.94623e-096	355.677	192	1	227	539	762	216	216	95.2	100	227	k__Fungi	p__Basidiomycota	c__Exobasidiomycetes	o__Exobasidiales	f__Exobasidiaceae	g__Exobasidium	s__Exobasidium_sp
OTU435	SINGLETON|n=1	0	0	1	MW822599	SH0858492.10FU	7.82224e-100	366.757	198	1	201	399	599	200	200	99.5	100	201	k__Fungi	p__Basidiomycota	c__Agaricomycetes	o__Agaricales	f__Psathyrellaceae	g__Coprinopsis	s__Coprinopsis_pseudonivea
OTU436	SINGLETON|n=1	0	0	1	PP115452	SH0911881.10FU	3.97377e-083	311.357	168	1	213	308	520	200	200	93.9	100	213	k__Fungi	p__Basidiomycota	c__Microbotryomycetes	o__Sporidiobolales	f__Sporidiobolaceae	g__Sporobolomyces	s__Sporobolomyces_salmonicolor
OTU437	SINGLETON|n=1	0	0	1	MH188916	SH0926074.10FU	5.87271e-077	291.044	157	1	238	347	584	212	212	89.1	100	238	k__Fungi	p__Basidiomycota	c__Exobasidiomycetes	o__Exobasidiales	f__Exobasidiales_fam_Incertae_sedis	g__Guomyces	s__Guomyces_nicotianae
OTU438	SINGLETON|n=1	0	0	1	GU062229	SH0926075.10FU	1.69655e-117	425.85	230	1	255	308	561	247	247	96.9	98.5	259	k__Fungi	p__Basidiomycota	c__Basidiomycota_cls_Incertae_sedis	o__Basidiomycota_ord_Incertae_sedis	f__Basidiomycota_fam_Incertae_sedis	g__Basidiomycota_gen_Incertae_sedis	s__Basidiomycota_sp
OTU439	SINGLETON|n=1	0	0	1	UDB01571240	SH0947752.10FU	4.81507e-077	291.044	157	1	200	297	500	189	189	94.5	100	200	k__Fungi	p__Basidiomycota	c__Cystobasidiomycetes	o__Buckleyzymales	f__Buckleyzymaceae	g__Buckleyzyma	s__Buckleyzyma_sp
OTU440	SINGLETON|n=1	0	0	1															k_	p_	c_	o_	f_	g_	s_
OTU441	SINGLETON|n=1	0	0	1	UDB01381858	SH0905238.10FU	8.27063e-019	97.1461	52	2	92	323	413	80	80	87.9	59.1	154	k__Fungi	p__Ascomycota	c__Ascomycota_cls_Incertae_sedis	o__Ascomycota_ord_Incertae_sedis	f__Ascomycota_fam_Incertae_sedis	g__Ascomycota_gen_Incertae_sedis	s__Ascomycota_sp
OTU442	SINGLETON|n=1	0	0	1	AY843099	SH0843083.10FU	1.53666e-065	252.265	136	1	142	313	454	140	140	98.6	98.6	144	k__Fungi	p__Ascomycota	c__Dothideomycetes	o__Capnodiales	f__Capnodiales_fam_Incertae_sedis	g__Capnodiales_gen_Incertae_sedis	s__Capnodiales_sp
OTU443	SINGLETON|n=1	0	0	1	UDB02020736	SH0843027.10FU	2.02178e-064	248.571	134	1	146	305	450	142	142	97.3	100	146	k__Fungi	p__Ascomycota	c__Dothideomycetes	o__Mycosphaerellales	f__Teratosphaeriaceae	g__Neocatenulostroma	s__Neocatenulostroma_sp
OTU444	SINGLETON|n=1	0	0	1	KJ706436	SH0887078.10FU	4.55533e-087	324.284	175	1	193	399	591	187	187	96.9	100	193	k__Fungi	p__Ascomycota	c__Saccharomycetes	o__Saccharomycetales	f__Debaryomycetaceae	g__Debaryomyces	s__Debaryomyces_hansenii
OTU445	SINGLETON|n=1	0	0	1	OQ600167	SH0897344.10FU	4.31489e-071	270.731	146	1	146	335	480	146	146	100	100	146	k__Fungi	p__Ascomycota	c__Leotiomycetes	o__Thelebolales	f__Pseudeurotiaceae	g__Beskidomyces	s__Beskidomyces_laricis
OTU446	SINGLETON|n=1	0	0	1	OQ383503	SH0966706.10FU	4.4867e-061	237.491	128	1	149	312	460	142	142	95.3	100	149	k__Fungi	p__Ascomycota	c__Leotiomycetes	o__Leotiales	f__Tympanidaceae	g__Pragmopora	s__Pragmopora_sp
OTU447	SINGLETON|n=1	0	0	1	LC639279	SH0946103.10FU	8.99555e-058	226.412	122	1	140	370	509	134	134	95.7	100	140	k__Fungi	p__Ascomycota	c__Leotiomycetes	o__Helotiales	f__Myxotrichaceae	g__Oidiodendron	s__Oidiodendron_griseum
OTU448	SINGLETON|n=1	0	0	1	UDB01773080	SH0961639.10FU	4.85878e-071	270.731	146	1	161	354	514	156	156	96.9	100	161	k__Fungi	p__Ascomycota	c__Eurotiomycetes	o__Chaetothyriales	f__Chaetothyriales_fam_Incertae_sedis	g__Chaetothyriales_gen_Incertae_sedis	s__Chaetothyriales_sp
OTU449	SINGLETON|n=1	0	0	1	LC015666	SH0960444.10FU	3.36327e-042	174.705	94	2	142	341	483	127	127	90.1	99.3	142	k__Fungi	p__Ascomycota	c__Lecanoromycetes	o__Lecanoromycetes_ord_Incertae_sedis	f__Lecanoromycetes_fam_Incertae_sedis	g__Lecanoromycetes_gen_Incertae_sedis	s__Lecanoromycetes_sp
OTU450	SINGLETON|n=1	0	0	1	LC646014	SH0801449.10FU	1.74869e-080	302.124	163	1	163	348	510	163	163	100	100	163	k__Fungi	p__Ascomycota	c__Eurotiomycetes	o__Phaeomoniellales	f__Celotheliaceae	g__Phaeomoniella	s__Phaeomoniella_sp
OTU451	SINGLETON|n=1	0	0	1	OR387067	SH0974819.10FU	1.44434e-097	359.37	194	1	219	363	580	211	211	96.3	100	219	k__Fungi	p__Ascomycota	c__Eurotiomycetes	o__Chaetothyriales	f__Herpotrichiellaceae	g__Exophiala	s__Exophiala_dermatitidis
OTU452	SINGLETON|n=1	0	0	1															k_	p_	c_	o_	f_	g_	s_
OTU453	SINGLETON|n=1	0	0	1	MT872624	SH0912804.10FU	6.01289e-035	150.699	81	1	149	578	729	129	129	86.6	100	149	k__Fungi	p__Ascomycota	c__Eurotiomycetes	o__Eurotiomycetes_ord_Incertae_sedis	f__Eurotiomycetes_fam_Incertae_sedis	g__Eurotiomycetes_gen_Incertae_sedis	s__Eurotiomycetes_sp
OTU454	SINGLETON|n=1	0	0	1															k_	p_	c_	o_	f_	g_	s_
OTU455	SINGLETON|n=1	0	0	1	UDB04010288	SH0903376.10FU	8.067e-014	80.5262	43	1	87	333	421	75	75	86.2	58	150	k__Fungi	p__Ascomycota	c__Eurotiomycetes	o__Eurotiales	f__Aspergillaceae	g__Penicillium	s__Penicillium_sp
OTU456	SINGLETON|n=1	0	0	1															k_	p_	c_	o_	f_	g_	s_
OTU457	SINGLETON|n=1	0	0	1	FR682353	SH0763657.10FU	9.81102e-068	259.651	140	4	152	329	478	147	147	98.7	98	152	k__Fungi	p__Ascomycota	c__Dothideomycetes	o__Mycosphaerellales	f__Neodevriesiaceae	g__Neodevriesia	s__Neodevriesia_knoxdaviesii
OTU458	SINGLETON|n=1	0	0	1	EU030275	SH0828639.10FU	3.83919e-067	257.805	139	1	160	334	493	153	153	95.6	98.2	163	k__Fungi	p__Ascomycota	c__Eurotiomycetes	o__Chaetothyriales	f__Herpotrichiellaceae	g__Sorocybe	s__Sorocybe_resinae
OTU459	SINGLETON|n=1	0	0	1															k_	p_	c_	o_	f_	g_	s_
OTU460	SINGLETON|n=1	0	0	1	UDB04472691	SH0912325.10FU	2.41129e-084	315.051	170	1	173	274	446	172	172	99.4	100	173	k__Fungi	p__Basidiomycota	c__Tremellomycetes	o__Tremellales	f__Cuniculitremaceae	g__Cuniculitrema	s__Cuniculitrema_sp
OTU461	SINGLETON|n=1	0	0	1	GU062229	SH0926075.10FU	3.65657e-114	414.77	224	1	254	308	561	244	244	96.1	98.4	258	k__Fungi	p__Basidiomycota	c__Basidiomycota_cls_Incertae_sedis	o__Basidiomycota_ord_Incertae_sedis	f__Basidiomycota_fam_Incertae_sedis	g__Basidiomycota_gen_Incertae_sedis	s__Basidiomycota_sp
OTU462	SINGLETON|n=1	0	0	1	GU062229	SH0926075.10FU	2.20409e-116	422.156	228	1	256	307	561	247	247	96.5	98.5	260	k__Fungi	p__Basidiomycota	c__Basidiomycota_cls_Incertae_sedis	o__Basidiomycota_ord_Incertae_sedis	f__Basidiomycota_fam_Incertae_sedis	g__Basidiomycota_gen_Incertae_sedis	s__Basidiomycota_sp
OTU463	SINGLETON|n=1	0	0	1	GU062229	SH0926075.10FU	6.22292e-097	357.524	193	1	253	308	561	235	235	92.9	98.4	257	k__Fungi	p__Basidiomycota	c__Basidiomycota_cls_Incertae_sedis	o__Basidiomycota_ord_Incertae_sedis	f__Basidiomycota_fam_Incertae_sedis	g__Basidiomycota_gen_Incertae_sedis	s__Basidiomycota_sp
OTU464	SINGLETON|n=1	0	0	1	GU062229	SH0926075.10FU	1.68924e-117	425.85	230	1	254	308	561	246	246	96.9	98.4	258	k__Fungi	p__Basidiomycota	c__Basidiomycota_cls_Incertae_sedis	o__Basidiomycota_ord_Incertae_sedis	f__Basidiomycota_fam_Incertae_sedis	g__Basidiomycota_gen_Incertae_sedis	s__Basidiomycota_sp
OTU465	SINGLETON|n=1	0	0	1	GU062229	SH0926075.10FU	1.04746e-099	366.757	198	1	256	308	561	237	237	92.6	98.5	260	k__Fungi	p__Basidiomycota	c__Basidiomycota_cls_Incertae_sedis	o__Basidiomycota_ord_Incertae_sedis	f__Basidiomycota_fam_Incertae_sedis	g__Basidiomycota_gen_Incertae_sedis	s__Basidiomycota_sp
OTU466	SINGLETON|n=1	0	0	1	GU062229	SH0926075.10FU	6.09224e-112	407.383	220	1	253	308	561	244	244	96.4	98.4	257	k__Fungi	p__Basidiomycota	c__Basidiomycota_cls_Incertae_sedis	o__Basidiomycota_ord_Incertae_sedis	f__Basidiomycota_fam_Incertae_sedis	g__Basidiomycota_gen_Incertae_sedis	s__Basidiomycota_sp
OTU467	SINGLETON|n=1	0	0	1	GU062229	SH0926075.10FU	1.68924e-117	425.85	230	1	254	308	561	246	246	96.9	98.4	258	k__Fungi	p__Basidiomycota	c__Basidiomycota_cls_Incertae_sedis	o__Basidiomycota_ord_Incertae_sedis	f__Basidiomycota_fam_Incertae_sedis	g__Basidiomycota_gen_Incertae_sedis	s__Basidiomycota_sp
OTU468	SINGLETON|n=1	0	0	1	GU062229	SH0926075.10FU	1.00346e-114	416.616	225	1	251	308	561	245	245	97.6	98.4	255	k__Fungi	p__Basidiomycota	c__Basidiomycota_cls_Incertae_sedis	o__Basidiomycota_ord_Incertae_sedis	f__Basidiomycota_fam_Incertae_sedis	g__Basidiomycota_gen_Incertae_sedis	s__Basidiomycota_sp
OTU469	SINGLETON|n=1	0	0	1	MN071391	SH1043354.10FU	1.96589e-071	272.578	147	1	222	297	518	197	197	88.7	100	222	k__Fungi	p__Fungi_phy_Incertae_sedis	c__Fungi_cls_Incertae_sedis	o__Fungi_ord_Incertae_sedis	f__Fungi_fam_Incertae_sedis	g__Fungi_gen_Incertae_sedis	s__Fungi_sp
OTU470	SINGLETON|n=1	0	0	1	MN071391	SH1043354.10FU	8.7663e-100	366.757	198	1	222	297	518	214	214	96.4	100	222	k__Fungi	p__Fungi_phy_Incertae_sedis	c__Fungi_cls_Incertae_sedis	o__Fungi_ord_Incertae_sedis	f__Fungi_fam_Incertae_sedis	g__Fungi_gen_Incertae_sedis	s__Fungi_sp
OTU471	SINGLETON|n=1	0	0	1	MN071391	SH1043354.10FU	1.88419e-101	372.297	201	1	222	297	518	215	215	96.8	100	222	k__Fungi	p__Fungi_phy_Incertae_sedis	c__Fungi_cls_Incertae_sedis	o__Fungi_ord_Incertae_sedis	f__Fungi_fam_Incertae_sedis	g__Fungi_gen_Incertae_sedis	s__Fungi_sp
OTU472	SINGLETON|n=1	0	0	1															k_	p_	c_	o_	f_	g_	s_
OTU473	SINGLETON|n=1	0	0	1	GU062229	SH0926075.10FU	4.73739e-118	427.696	231	1	256	308	561	248	248	96.9	98.5	260	k__Fungi	p__Basidiomycota	c__Basidiomycota_cls_Incertae_sedis	o__Basidiomycota_ord_Incertae_sedis	f__Basidiomycota_fam_Incertae_sedis	g__Basidiomycota_gen_Incertae_sedis	s__Basidiomycota_sp
OTU474	SINGLETON|n=1	0	0	1	PP115452	SH0911881.10FU	1.80999e-096	355.677	192	1	213	308	520	206	206	96.7	100	213	k__Fungi	p__Basidiomycota	c__Microbotryomycetes	o__Sporidiobolales	f__Sporidiobolaceae	g__Sporobolomyces	s__Sporobolomyces_salmonicolor
OTU475	SINGLETON|n=1	0	0	1	UDB07674985	SH1012176.10FU	2.58963e-058	228.258	123	1	144	315	458	137	137	95.1	100	144	k__Fungi	p__Ascomycota	c__Leotiomycetes	o__Helotiales	f__Pezizellaceae	g__Ciliolarina	s__Ciliolarina_sp
OTU476	SINGLETON|n=1	0	0	1	AY843109	SH0938058.10FU	2.00752e-069	265.191	143	1	146	311	456	145	145	99.3	100	146	k__Fungi	p__Ascomycota	c__Dothideomycetes	o__Mycosphaerellales	f__Teratosphaeriaceae	g__Constantinomyces	s__Constantinomyces_nebulosus
