# Supplementary material for: Extremotolerant Fungi in Resinous Soils: A Unique Diversity of Generalist and Specialized Hydrocarbon Degraders
Source: Research Square preprint supplement (doi:10.21203/rs.3.rs-8530099/v1), 2026-02-10
Supplement: Supplementary file 5 [file 69a8bb289f534e49ead072e9.xlsx]

## Sheet: functional_enrichment_full
DEseq2 analysis of the 3 resin soils replicas (in combinations of two) vs the 2 forest soil replicas
C1: combination RS.I and RS.II
C2: combination RS.I and RS.III
C3: combination RS.II and RS.III
Functional_Category	C1 baseMean	C1 log2FoldChange	C1 lfcSE	C1 stat	C1 pvalue	C1 padj	C2 baseMean	C2 log2FoldChange	C2 lfcSE	C2 stat	C2 pvalue	C2 padj	C3 baseMean	C3 log2FoldChange	C3 lfcSE	C3 stat	C3 pvalue	C3 padj
00010 Glycolysis / Gluconeogenesis [PATH:ko00010]	201059	0.102377	0.0317846	3.22096	0.00127763	0.00227728	232656	0.106622	0.0350082	3.04562	0.002322	0.00400475	216220	0.134431	0.0311855	4.31069	1.63e-05	3.98e-05
00020 Citrate cycle (TCA cycle) [PATH:ko00020]	97044.1	0.435736	0.0302151	14.4211	3.81e-47	1.08e-45	113444	0.465033	0.0389956	11.9253	8.74e-33	2.07e-31	105050	0.481055	0.0354129	13.5842	4.97e-42	1.63e-40
00030 Pentose phosphate pathway [PATH:ko00030]	83146.3	-0.084704	0.0337754	-2.50786	0.0121464	0.0187477	95928.9	-0.0889532	0.0359688	-2.47306	0.0133961	0.020402	88574.8	-0.0784472	0.0367888	-2.13237	0.0329768	0.0487782
00040 Pentose and glucuronate interconversions [PATH:ko00040]	90056.9	-0.184986	0.0324489	-5.70082	1.19e-08	3.63e-08	102832	-0.221578	0.0338789	-6.5403	6.14e-11	2.22e-10	95334.6	-0.198032	0.0387065	-5.11625	3.12e-07	9.16e-07
00051 Fructose and mannose metabolism [PATH:ko00051]	126145	-0.113238	0.0338509	-3.34519	0.000822263	0.00150336	145920	-0.10967	0.0360488	-3.04228	0.00234792	0.00403312	134578	-0.10251	0.0359205	-2.85381	0.00431979	0.00748062
00052 Galactose metabolism [PATH:ko00052]	104516	-0.253629	0.0336719	-7.53237	4.98e-14	2.36e-13	119709	-0.281325	0.0337987	-8.32354	8.54e-17	5.6e-16	111014	-0.256315	0.0371075	-6.90737	4.94e-12	2.26e-11
00053 Ascorbate and aldarate metabolism [PATH:ko00053]	84995.8	-0.0525459	0.0391593	-1.34185	0.179644	0.224159	96938.8	-0.0908443	0.034391	-2.64151	0.00825371	0.0132682	90519.2	-0.0472781	0.039618	-1.19335	0.232733	0.290745
00061 Fatty acid biosynthesis [PATH:ko00061]	93166.6	0.043946	0.0413401	1.06304	0.287766	0.343384	107516	0.0406249	0.0405594	1.00161	0.31653	0.383073	99825.2	0.0663322	0.0399964	1.65845	0.0972263	0.129838
00062 Fatty acid elongation [PATH:ko00062]	16464.8	-0.13599	0.0624927	-2.1761	0.0295477	0.0429601	19427.8	-0.0731766	0.0564004	-1.29745	0.194477	0.248045	17613.7	-0.116647	0.0656063	-1.77799	0.0754058	0.103958
00071 Fatty acid degradation [PATH:ko00071]	127989	-0.0313708	0.0329777	-0.951273	0.341466	0.402949	146845	-0.0518744	0.0338869	-1.53081	0.125816	0.163907	136044	-0.0317067	0.0358428	-0.884605	0.37637	0.450375
00073 Cutin, suberine and wax biosynthesis [PATH:ko00073]	3936.37	0.0748729	0.0934888	0.800875	0.423204	0.485943	4467.85	0.023419	0.0988506	0.236913	0.812725	0.850665	4028.72	-0.0350144	0.104561	-0.334871	0.737722	0.789622
00100 Steroid biosynthesis [PATH:ko00100]	53638.1	-0.118712	0.0361098	-3.28752	0.00101073	0.00183221	62258.1	-0.104958	0.038625	-2.71736	0.00658059	0.0106997	57189	-0.109753	0.0401898	-2.73087	0.00631668	0.0105941
00120 Primary bile acid biosynthesis [PATH:ko00120]	12845.9	0.0500441	0.0695952	0.719074	0.472095	0.532044	14531.2	-0.0105514	0.0650744	-0.162144	0.871193	0.902988	13496.9	0.016434	0.0741324	0.221684	0.82456	0.858125
00121 Secondary bile acid biosynthesis [PATH:ko00121]	133.662	0.466322	0.510403	0.913635	0.360909	0.4198	155.782	0.486725	0.47114	1.03308	0.301567	0.368102	137.316	0.380692	0.552155	0.689465	0.490531	0.563251
00130 Ubiquinone and other terpenoid-quinone biosynthesis [PATH:ko00130]	59667.5	-0.0606658	0.041778	-1.4521	0.146474	0.185708	68350.5	-0.0860393	0.0413655	-2.07997	0.0375278	0.0520745	63191.5	-0.071816	0.0442207	-1.62404	0.104368	0.138507
00140 Steroid hormone biosynthesis [PATH:ko00140]	9424.21	-0.38508	0.0700309	-5.49871	3.83e-08	1.09e-07	10867.3	-0.39132	0.0660291	-5.92649	3.09e-09	9.16e-09	10063.5	-0.370034	0.0729207	-5.07447	3.89e-07	1.12e-06
00190 Oxidative phosphorylation [PATH:ko00190]	171647	0.440205	0.0302058	14.5735	4.14e-48	1.36e-46	203390	0.502919	0.0440963	11.405	3.95e-30	8.01e-29	187728	0.510793	0.0409022	12.4882	8.66e-36	2.17e-34
00194 Photosynthesis proteins [BR:ko00194]	99.164	0.0800348	0.533838	0.149923	0.880825	0.891286	109.235	-0.0586084	0.527822	-0.111038	0.911586	0.933499	101.016	-0.045424	0.615305	-0.0738236	0.941151	0.952328
00195 Photosynthesis [PATH:ko00195]	80.142	-0.222584	0.586257	-0.379669	0.704191	0.737065	92.474	-0.229982	0.567011	-0.405605	0.685033	0.746353	81.6239	-0.363069	0.673687	-0.538929	0.589936	0.651069
00196 Photosynthesis - antenna proteins [PATH:ko00196]	19.022	1.47646	1.17852	1.25282	0.210273	0.257668	16.761	0.915102	1.28557	0.711825	0.476573	0.539947	19.3918	1.38952	1.37364	1.01156	0.311748	0.37836
00199 Cytochrome P450 [BR:ko00199]	126890	-0.352393	0.0498584	-7.06787	1.57e-12	6.44e-12	144526	-0.399729	0.0449701	-8.88877	6.18e-19	4.87e-18	134433	-0.36356	0.0488536	-7.44184	9.93e-14	5.16e-13
00220 Arginine biosynthesis [PATH:ko00220]	77637.5	0.0771292	0.029809	2.58744	0.00966913	0.0152557	90229.5	0.0936117	0.0364086	2.57114	0.0101364	0.0158754	83386.8	0.10603	0.0349179	3.03655	0.00239302	0.00424458
00230 Purine metabolism [PATH:ko00230]	174395	0.0801563	0.0259308	3.09116	0.00199378	0.00343867	202838	0.0987221	0.0328668	3.0037	0.00266721	0.00454492	186722	0.100215	0.0319495	3.13667	0.00170879	0.00312422
00232 Caffeine metabolism [PATH:ko00232]	6636.38	0.404799	0.0674358	6.00272	1.94e-09	6.46e-09	7613.72	0.386806	0.0684275	5.65278	1.58e-08	4.37e-08	7027.46	0.394666	0.0784463	5.03104	4.88e-07	1.38e-06
00240 Pyrimidine metabolism [PATH:ko00240]	90223.8	0.144679	0.0373955	3.86888	0.000109336	0.00022501	104047	0.139559	0.0375437	3.71725	0.0002014	0.000395375	96846	0.171215	0.0361896	4.73106	2.23e-06	5.95e-06
00250 Alanine, aspartate and glutamate metabolism [PATH:ko00250]	125828	0.0232971	0.0315509	0.738398	0.460272	0.521479	145750	0.030567	0.0351796	0.868884	0.38491	0.450472	134674	0.0427308	0.0341546	1.2511	0.210899	0.266596
00253 Tetracycline biosynthesis [PATH:ko00253]	890.05	-0.260078	0.235704	-1.10341	0.26985	0.325655	1054.56	-0.182127	0.207539	-0.877553	0.380186	0.446169	953.15	-0.236972	0.237081	-0.99954	0.317533	0.383199
00254 Aflatoxin biosynthesis [PATH:ko00254]	67134.7	-0.0294865	0.052546	-0.561156	0.574691	0.629353	76400.1	-0.0738921	0.0428854	-1.72301	0.0848859	0.111955	71846.5	-0.010087	0.0469563	-0.214817	0.82991	0.858125
00260 Glycine, serine and threonine metabolism [PATH:ko00260]	215919	-0.273873	0.0351087	-7.80071	6.16e-15	3.16e-14	247451	-0.299929	0.0344565	-8.70456	3.19e-18	2.3e-17	229474	-0.274711	0.0365595	-7.51407	5.73e-14	3.09e-13
00261 Monobactam biosynthesis [PATH:ko00261]	17069.4	0.147952	0.0443007	3.33972	0.000838643	0.00152676	19670.6	0.140813	0.047238	2.98094	0.00287369	0.00487725	18139.2	0.146923	0.052531	2.79688	0.00515986	0.0087924
00270 Cysteine and methionine metabolism [PATH:ko00270]	174483	0.0392927	0.0318921	1.23205	0.217931	0.266013	202341	0.0497652	0.0354563	1.40357	0.160448	0.207124	186900	0.0609008	0.0340123	1.79055	0.0733649	0.101472
00280 Valine, leucine and isoleucine degradation [PATH:ko00280]	165222	-0.0226978	0.0342198	-0.663295	0.507142	0.56408	188377	-0.0616038	0.0334896	-1.83949	0.0658428	0.0887628	175047	-0.0325795	0.0380489	-0.856252	0.391858	0.46629
00281 Geraniol degradation [PATH:ko00281]	12367.2	-0.37207	0.0662554	-5.6157	1.96e-08	5.67e-08	13935.5	-0.4563	0.0652692	-6.99103	2.73e-12	1.09e-11	12938.8	-0.425846	0.0764364	-5.57124	2.53e-08	8.16e-08
00290 Valine, leucine and isoleucine biosynthesis [PATH:ko00290]	59903	-0.145807	0.0414514	-3.51755	0.000435556	0.000817388	68754.4	-0.165987	0.0409925	-4.04921	5.14e-05	0.000107845	63549.3	-0.152088	0.043462	-3.49932	0.000466448	0.00095075
00300 Lysine biosynthesis [PATH:ko00300]	66492.4	0.315797	0.032877	9.60541	7.59e-22	6.88e-21	77540	0.339903	0.0405074	8.39114	4.81e-17	3.2e-16	71971.9	0.362578	0.036473	9.941	2.76e-23	3.92e-22
00310 Lysine degradation [PATH:ko00310]	128779	0.0734373	0.0352381	2.08403	0.0371575	0.0534766	149308	0.0832611	0.0384002	2.16825	0.0301398	0.0427985	138909	0.114246	0.0338081	3.37926	0.000726824	0.00139472
00311 Penicillin and cephalosporin biosynthesis [PATH:ko00311]	15808.3	-0.552884	0.0620476	-8.91064	5.07e-19	3.38e-18	18097.1	-0.585595	0.0559487	-10.4666	1.23e-25	1.87e-24	16841.7	-0.545145	0.0625679	-8.71286	2.96e-18	2.74e-17
00330 Arginine and proline metabolism [PATH:ko00330]	173257	-0.263614	0.0382653	-6.8891	5.61e-12	2.24e-11	198784	-0.285895	0.0352478	-8.11101	5.02e-16	2.85e-15	185217	-0.245877	0.0359111	-6.84682	7.55e-12	3.35e-11
00331 Clavulanic acid biosynthesis [PATH:ko00331]	1.186	3.64516	4.82946	0.754777	0.450383	0.511635	2.198	4.32822	3.94834	1.09621	0.272985	0.340035	1.97248	4.2943	4.64095	0.925307	0.354806	0.42697
00332 Carbapenem biosynthesis [PATH:ko00332]	5595.47	0.0601984	0.0748137	0.804644	0.421025	0.484748	6471.19	0.0627146	0.0740742	0.846645	0.397193	0.459794	5923.74	0.048438	0.0846942	0.571917	0.567379	0.632731
00333 Prodigiosin biosynthesis [PATH:ko00333]	46267.8	-0.415056	0.0586071	-7.082	1.42e-12	5.88e-12	52800.3	-0.456905	0.0522029	-8.75247	2.09e-18	1.59e-17	49077.2	-0.422459	0.0564597	-7.48249	7.29e-14	3.88e-13
00340 Histidine metabolism [PATH:ko00340]	75816	0.0850868	0.0372799	2.28237	0.0224672	0.0334652	87280.9	0.075028	0.0366972	2.04451	0.0409029	0.0562084	81399	0.112754	0.0354947	3.17664	0.00148991	0.00273578
00350 Tyrosine metabolism [PATH:ko00350]	126085	-0.154644	0.0413147	-3.74308	0.000181782	0.000361864	144368	-0.182278	0.0382378	-4.76696	1.87e-06	4.45e-06	134300	-0.148622	0.0404586	-3.67343	0.000239314	0.000504691
00360 Phenylalanine metabolism [PATH:ko00360]	101627	-0.33764	0.0400813	-8.42389	3.64e-17	2.13e-16	115831	-0.382472	0.0366741	-10.4289	1.83e-25	2.6e-24	107786	-0.345245	0.0422368	-8.17404	2.98e-16	2.15e-15
00361 Chlorocyclohexane and chlorobenzene degradation [PATH:ko00361]	29262.4	-0.488031	0.0583149	-8.36888	5.82e-17	3.35e-16	33387.6	-0.531815	0.0527201	-10.0875	6.27e-24	8.35e-23	31005.9	-0.49947	0.0584227	-8.54924	1.24e-17	1.03e-16
00362 Benzoate degradation [PATH:ko00362]	84688.3	-0.361779	0.0469973	-7.69788	1.38e-14	6.93e-14	96595.6	-0.404541	0.0429422	-9.42059	4.49e-21	4.25e-20	89781.5	-0.370858	0.047173	-7.86166	3.79e-15	2.34e-14
00363 Bisphenol degradation [PATH:ko00363]	13080.9	-0.293305	0.0566049	-5.18162	2.2e-07	5.82e-07	14913.6	-0.336116	0.0528622	-6.35834	2.04e-10	6.79e-10	13894.8	-0.295961	0.0624308	-4.74063	2.13e-06	5.74e-06
00364 Fluorobenzoate degradation [PATH:ko00364]	9333.52	-0.423914	0.0693984	-6.10841	1.01e-09	3.4e-09	10773	-0.427437	0.0661831	-6.4584	1.06e-10	3.76e-10	9885.76	-0.436352	0.0735054	-5.93632	2.91e-09	1.04e-08
00365 Furfural degradation [PATH:ko00365]	35.36	-0.462721	0.868889	-0.532543	0.59435	0.647553	35.87	-0.954008	0.888028	-1.0743	0.282689	0.349193	36.6218	-0.558337	1.00857	-0.553595	0.579856	0.641607
00380 Tryptophan metabolism [PATH:ko00380]	159810	-0.221599	0.03804	-5.82543	5.7e-09	1.81e-08	182730	-0.254331	0.0342724	-7.42087	1.16e-13	5.07e-13	170283	-0.214362	0.0374796	-5.71943	1.07e-08	3.59e-08
00400 Phenylalanine, tyrosine and tryptophan biosynthesis [PATH:ko00400]	74828.2	-0.0809937	0.0300056	-2.69929	0.00694881	0.0110869	86187.9	-0.0902376	0.0339665	-2.65667	0.00789171	0.0127343	79558.1	-0.0805831	0.0355134	-2.26909	0.0232627	0.0357758
00401 Novobiocin biosynthesis [PATH:ko00401]	17496.3	-0.00572353	0.0514275	-0.111293	0.911384	0.917848	20070.8	-0.0262912	0.0496832	-0.529177	0.596683	0.660226	18641.5	0.000808197	0.0553473	0.0146023	0.988349	0.988349
00402 Benzoxazinoid biosynthesis [PATH:ko00402]	3.849	-2.1689	2.37314	-0.913937	0.36075	0.4198	4.49	-2.1095	2.38619	-0.884046	0.376671	0.443265	3.99845	-2.37191	2.83327	-0.837161	0.402502	0.476294
00403 Indole diterpene alkaloid biosynthesis [PATH:ko00403]	10158	-0.274974	0.0754259	-3.64561	0.000266756	0.000507312	11417.1	-0.364077	0.0611568	-5.95317	2.63e-09	7.83e-09	10779.7	-0.280995	0.0779757	-3.60363	0.000313805	0.000648937
00404 Staurosporine biosynthesis [PATH:ko00404]	15938.9	-0.450395	0.0523601	-8.60187	7.84e-18	4.84e-17	18072.2	-0.515334	0.049351	-10.4422	1.59e-25	2.34e-24	16841.3	-0.471538	0.0617125	-7.64088	2.16e-14	1.24e-13
00405 Phenazine biosynthesis [PATH:ko00405]	5691.07	0.177716	0.0695985	2.55345	0.0106662	0.0167052	6579.66	0.179545	0.0711976	2.52178	0.0116762	0.0180219	6070.36	0.186903	0.0815622	2.29154	0.0219319	0.0340986
00410 beta-Alanine metabolism [PATH:ko00410]	102947	-0.0906236	0.0382934	-2.36656	0.0179543	0.0269315	118062	-0.11285	0.0368704	-3.06072	0.00220808	0.00382376	109635	-0.0852904	0.0388742	-2.19401	0.0282348	0.0426526
00430 Taurine and hypotaurine metabolism [PATH:ko00430]	23620.3	-0.139448	0.0394135	-3.53809	0.000403038	0.000759709	27300.3	-0.138416	0.0429792	-3.22054	0.00127949	0.00228059	25122.3	-0.137931	0.0468574	-2.94365	0.00324371	0.0056865
00440 Phosphonate and phosphinate metabolism [PATH:ko00440]	10302.3	-0.31766	0.0551101	-5.7641	8.21e-09	2.53e-08	11971.9	-0.299061	0.0572409	-5.2246	1.75e-07	4.43e-07	11003	-0.30242	0.0643618	-4.69874	2.62e-06	6.93e-06
00450 Selenocompound metabolism [PATH:ko00450]	40714.7	0.222552	0.039574	5.62368	1.87e-08	5.45e-08	47549	0.251343	0.0448815	5.60016	2.14e-08	5.77e-08	44023.1	0.267983	0.0435063	6.15964	7.29e-10	2.7e-09
00460 Cyanoamino acid metabolism [PATH:ko00460]	70205.2	-0.244914	0.0320299	-7.6464	2.07e-14	1.02e-13	80459.2	-0.270643	0.0342528	-7.90133	2.76e-15	1.4e-14	74502.9	-0.250492	0.037864	-6.61556	3.7e-11	1.5e-10
00471 D-Glutamine and D-glutamate metabolism [PATH:ko00471]	2227.38	-1.01125	0.108053	-9.35879	8.07e-21	6.36e-20	2561.96	-1.0315	0.108963	-9.46654	2.89e-21	2.87e-20	2351.39	-1.04251	0.127164	-8.19814	2.44e-16	1.82e-15
00472 D-Arginine and D-ornithine metabolism [PATH:ko00472]	11536.1	-0.471447	0.0620595	-7.59669	3.04e-14	1.45e-13	13281.8	-0.483189	0.0589391	-8.19811	2.44e-16	1.52e-15	12337.5	-0.450645	0.0647781	-6.95675	3.48e-12	1.63e-11
00473 D-Alanine metabolism [PATH:ko00473]	2030	-1.39435	0.124871	-11.1663	5.96e-29	8.19e-28	2332.07	-1.42432	0.119839	-11.8852	1.41e-32	3.17e-31	2151.09	-1.4115	0.139059	-10.1504	3.3e-24	5.02e-23
00480 Glutathione metabolism [PATH:ko00480]	85680.6	0.0965553	0.0297539	3.24513	0.00117397	0.00211018	99737.6	0.117348	0.0355148	3.30419	0.000952507	0.00171936	91752.6	0.117022	0.0356775	3.28	0.00103807	0.0019481
00500 Starch and sucrose metabolism [PATH:ko00500]	188855	-0.235387	0.0275804	-8.53458	1.41e-17	8.56e-17	217066	-0.251874	0.0310413	-8.11415	4.89e-16	2.82e-15	200629	-0.237521	0.0323737	-7.33684	2.19e-13	1.1e-12
00510 N-Glycan biosynthesis [PATH:ko00510]	57917.2	-0.00872999	0.0298964	-0.292008	0.77028	0.796455	68043.7	0.0391587	0.039747	0.985198	0.324527	0.390532	62445.4	0.0320551	0.0414356	0.773612	0.43916	0.512554
00511 Other glycan degradation [PATH:ko00511]	37202.3	-0.288131	0.0537691	-5.35868	8.38e-08	2.29e-07	42347.9	-0.336422	0.0489482	-6.87303	6.29e-12	2.41e-11	39421	-0.29877	0.0548389	-5.44814	5.09e-08	1.59e-07
00512 Mucin type O-glycan biosynthesis [PATH:ko00512]	7.312	-4.91987	2.32682	-2.11442	0.0344795	0.0497907	8.637	-4.28742	1.99452	-2.1496	0.0315865	0.0447038	7.72794	-5.13547	2.53772	-2.02366	0.0430053	0.0625265
00513 Various types of N-glycan biosynthesis [PATH:ko00513]	74241.4	-0.130327	0.0291878	-4.46511	8e-06	1.92e-05	87006.3	-0.0876813	0.0390028	-2.24808	0.0245714	0.0354828	80009.9	-0.0891061	0.0391067	-2.27854	0.0226946	0.035156
00514 Other types of O-glycan biosynthesis [PATH:ko00514]	18594.3	0.289302	0.0548685	5.27264	1.34e-07	3.63e-07	22332.2	0.389206	0.0530041	7.34294	2.09e-13	8.73e-13	20154.6	0.340215	0.066564	5.1111	3.2e-07	9.35e-07
00515 Mannose type O-glycan biosynthesis [PATH:ko00515]	5924.46	-0.0481574	0.0798536	-0.603071	0.546462	0.601531	7078.6	0.0480643	0.0700915	0.685736	0.49288	0.555468	6354.2	-0.0218428	0.0905256	-0.241289	0.809331	0.847113
00520 Amino sugar and nucleotide sugar metabolism [PATH:ko00520]	176854	-0.0732753	0.0300164	-2.44117	0.0146397	0.0222733	203586	-0.0843111	0.0332094	-2.53877	0.0111243	0.0172954	188058	-0.0725424	0.0337312	-2.1506	0.0315076	0.0470955
00521 Streptomycin biosynthesis [PATH:ko00521]	34982.7	-0.0207682	0.0477814	-0.434652	0.663815	0.708735	40639.8	-0.00474325	0.0484209	-0.0979587	0.921965	0.938267	37730.9	0.0212404	0.0475291	0.446892	0.654953	0.709949
00522 Biosynthesis of 12-, 14- and 16-membered macrolides [PATH:ko00522]	7.776	-2.46968	1.7659	-1.39853	0.161953	0.204118	9.442	-2.05197	1.69888	-1.20783	0.227111	0.286241	8.63858	-2.08614	1.98647	-1.05017	0.293639	0.359455
00523 Polyketide sugar unit biosynthesis [PATH:ko00523]	2300.45	-0.671243	0.113655	-5.90598	3.51e-09	1.15e-08	2725.48	-0.579901	0.107475	-5.39569	6.83e-08	1.77e-07	2467.58	-0.637404	0.13118	-4.85902	1.18e-06	3.24e-06
00524 Neomycin, kanamycin and gentamicin biosynthesis [PATH:ko00524]	16756.2	-0.324979	0.0522975	-6.21405	5.16e-10	1.79e-09	19292.4	-0.336401	0.052084	-6.4588	1.06e-10	3.76e-10	17753.4	-0.335923	0.0572518	-5.86747	4.42e-09	1.56e-08
00525 Acarbose and validamycin biosynthesis [PATH:ko00525]	219.541	1.0639	0.352022	3.02225	0.00250906	0.00427543	310.066	1.47378	0.325892	4.52228	6.12e-06	1.4e-05	268.086	1.35237	0.410324	3.29587	0.000981184	0.00185771
00531 Glycosaminoglycan degradation [PATH:ko00531]	23068.2	-0.45037	0.0473932	-9.50283	2.04e-21	1.71e-20	26342.7	-0.490543	0.0449104	-10.9227	8.98e-28	1.47e-26	24492.4	-0.454846	0.0524134	-8.67806	4.03e-18	3.65e-17
00532 Glycosaminoglycan biosynthesis - chondroitin sulfate / dermatan sulfate [PATH:ko00532]	96.126	1.31424	0.519529	2.52967	0.0114171	0.0177507	111.865	1.32672	0.508751	2.60781	0.00911239	0.0144846	95.5893	1.17645	0.613981	1.91611	0.0553515	0.078338
00533 Glycosaminoglycan biosynthesis - keratan sulfate [PATH:ko00533]	16.753	-0.0760243	1.18531	-0.064139	0.94886	0.951092	19.675	-0.0331492	1.17098	-0.028309	0.977416	0.984348	16.7301	-0.271715	1.42065	-0.191261	0.848321	0.87291
00534 Glycosaminoglycan biosynthesis - heparan sulfate / heparin [PATH:ko00534]	246.504	1.55586	0.361833	4.29993	1.71e-05	3.85e-05	292.42	1.60569	0.336146	4.77677	1.78e-06	4.26e-06	253.864	1.49299	0.399096	3.74093	0.000183338	0.000388568
00535 Proteoglycans [BR:ko00535]	7145.48	1.28659	0.0717219	17.9386	5.89e-72	5.02e-70	8557.17	1.35956	0.083052	16.37	3.13e-60	2.67e-58	8068.37	1.40866	0.0786415	17.9124	9.44e-72	2.01e-69
00536 Glycosaminoglycan binding proteins [BR:ko00536]	6642.91	0.0147348	0.0689714	0.213637	0.83083	0.847293	7607.7	-0.0105992	0.0683124	-0.155158	0.876697	0.904293	7057.31	0.012701	0.0788015	0.161177	0.871954	0.888642
00537 Glycosylphosphatidylinositol (GPI)-anchored proteins [BR:ko00537]	73171.9	-0.286528	0.0281627	-10.174	2.59e-24	2.98e-23	84845	-0.275163	0.0343583	-8.00864	1.16e-15	6.33e-15	78102.8	-0.273505	0.0348539	-7.84719	4.25e-15	2.59e-14
00540 Lipopolysaccharide biosynthesis [PATH:ko00540]	1714.55	-0.604058	0.151653	-3.98317	6.8e-05	0.000145572	2048.04	-0.486489	0.134897	-3.60637	0.000310511	0.000587901	1843.08	-0.562829	0.162583	-3.4618	0.000536582	0.00106815
00541 O-Antigen nucleotide sugar biosynthesis [PATH:ko00541]	22997.6	0.0628189	0.0417814	1.50351	0.132707	0.169261	26777.6	0.0846269	0.0453335	1.86676	0.0619345	0.0837591	24621.1	0.0829074	0.0488462	1.69732	0.0896368	0.120987
00542 O-Antigen repeat unit biosynthesis [PATH:ko00542]	17.971	-2.19639	1.22376	-1.79479	0.0726875	0.0979901	21.124	-2.08202	1.16915	-1.78079	0.0749467	0.0997729	18.4678	-2.50453	1.41043	-1.77572	0.0757793	0.104135
00550 Peptidoglycan biosynthesis [PATH:ko00550]	4085.4	-0.810079	0.0810841	-9.9906	1.68e-23	1.78e-22	4686.74	-0.838729	0.0827526	-10.1354	3.85e-24	5.29e-23	4318.24	-0.833416	0.0963834	-8.64689	5.29e-18	4.7e-17
00561 Glycerolipid metabolism [PATH:ko00561]	121785	-0.0399461	0.0313429	-1.27449	0.202491	0.249482	140986	-0.0341746	0.0349875	-0.976764	0.328686	0.394423	130354	-0.0199114	0.0338591	-0.588068	0.556486	0.628815
00562 Inositol phosphate metabolism [PATH:ko00562]	111761	-0.0370831	0.0296138	-1.25222	0.210489	0.257668	129746	-0.023135	0.0354171	-0.653217	0.513616	0.575791	119958	-0.00898429	0.0333576	-0.269333	0.787674	0.832628
00563 Glycosylphosphatidylinositol (GPI)-anchor biosynthesis [PATH:ko00563]	38964.4	-0.255033	0.0391022	-6.52221	6.93e-11	2.57e-10	45751.2	-0.204623	0.0405207	-5.04983	4.42e-07	1.1e-06	41713.5	-0.232711	0.0464365	-5.01138	5.4e-07	1.51e-06
00564 Glycerophospholipid metabolism [PATH:ko00564]	138865	-0.0477884	0.0276381	-1.72908	0.0837947	0.110859	161750	-0.0241097	0.0348332	-0.692149	0.488844	0.552381	149009	-0.0203785	0.0336213	-0.606119	0.544436	0.616834
00565 Ether lipid metabolism [PATH:ko00565]	38332.4	-0.228055	0.0351977	-6.47925	9.22e-11	3.36e-10	44325.5	-0.225574	0.0387573	-5.82015	5.88e-09	1.67e-08	40700.8	-0.231832	0.0412024	-5.62666	1.84e-08	6.07e-08
00571 Lipoarabinomannan (LAM) biosynthesis [PATH:ko00571]	7.446	-2.39638	1.78231	-1.34454	0.178774	0.224159	8.874	-2.13571	1.7411	-1.22665	0.219955	0.278044	8.11637	-2.1762	2.03761	-1.06802	0.285512	0.350514
00572 Arabinogalactan biosynthesis - Mycobacterium [PATH:ko00572]	5.092	-1.71649	2.05268	-0.836221	0.403031	0.465287	5.968	-1.63238	2.06559	-0.790273	0.429369	0.491696	5.44374	-1.68233	2.4168	-0.696097	0.486368	0.559981
00590 Arachidonic acid metabolism [PATH:ko00590]	21980.5	0.0390826	0.0443431	0.88137	0.378118	0.437712	25461.1	0.0459682	0.0458229	1.00317	0.315778	0.383073	23231.2	0.0222681	0.0494436	0.450374	0.652441	0.70903
00591 Linoleic acid metabolism [PATH:ko00591]	16010.7	0.0844806	0.050852	1.66131	0.0966521	0.12708	18233.1	0.0437	0.050482	0.865654	0.38668	0.451303	16936.9	0.0703969	0.0587448	1.19835	0.23078	0.289154
00592 alpha-Linolenic acid metabolism [PATH:ko00592]	29560.1	0.273225	0.038952	7.0144	2.31e-12	9.37e-12	34060.3	0.26602	0.0416053	6.3939	1.62e-10	5.6e-10	31391.9	0.270519	0.0450114	6.01001	1.86e-09	6.7e-09
00600 Sphingolipid metabolism [PATH:ko00600]	53699.3	-0.0770902	0.0324067	-2.37884	0.0173674	0.0261431	61922.1	-0.082878	0.0359134	-2.30772	0.0210149	0.0308701	57213.7	-0.0704275	0.0375989	-1.87312	0.0610512	0.085552
00601 Glycosphingolipid biosynthesis - lacto and neolacto series [PATH:ko00601]	51.689	2.13646	0.717627	2.97712	0.00290968	0.00488002	58.808	2.10705	0.714249	2.95002	0.00317758	0.00535039	50.0296	1.96595	0.857246	2.29333	0.0218288	0.0340626
00603 Glycosphingolipid biosynthesis - globo and isoglobo series [PATH:ko00603]	14091.4	0.0687588	0.0711066	0.966982	0.333553	0.395804	15957.7	0.0116415	0.0633403	0.183793	0.854176	0.88968	14921.1	0.0572729	0.0723758	0.791326	0.428754	0.501783
00604 Glycosphingolipid biosynthesis - ganglio series [PATH:ko00604]	9992.75	-0.226405	0.0660086	-3.42993	0.000603735	0.00111338	11501.9	-0.238281	0.0634685	-3.75432	0.000173811	0.000344388	10646.1	-0.219748	0.0705097	-3.11657	0.00182968	0.00331679
00620 Pyruvate metabolism [PATH:ko00620]	230278	0.136418	0.0312159	4.37016	1.24e-05	2.89e-05	266994	0.146046	0.0356134	4.10086	4.12e-05	8.68e-05	248085	0.17299	0.0308939	5.59947	2.15e-08	6.99e-08
00621 Dioxin degradation [PATH:ko00621]	46175.1	-0.0903315	0.0457798	-1.97317	0.0484759	0.0686071	52416.5	-0.143333	0.0398428	-3.59746	0.000321335	0.000605702	48987.4	-0.0964602	0.04802	-2.00875	0.0445636	0.0645718
00622 Xylene degradation [PATH:ko00622]	5124.52	0.0357786	0.0890138	0.401944	0.687725	0.725175	5706.31	-0.0708186	0.0758051	-0.93422	0.350191	0.415979	5415.2	0.0182811	0.0984644	0.185662	0.85271	0.874215
00623 Toluene degradation [PATH:ko00623]	33975.4	0.0721466	0.0537842	1.34141	0.179788	0.224159	38775.3	0.0375483	0.0458997	0.818053	0.413327	0.474602	36400.3	0.0939877	0.0497818	1.88799	0.0590268	0.0832629
00624 Polycyclic aromatic hydrocarbon degradation [PATH:ko00624]	45872.6	-0.0966125	0.0456389	-2.11689	0.0342692	0.0496554	52120.2	-0.146985	0.0401744	-3.65866	0.000253535	0.000488714	48675.2	-0.102216	0.0477936	-2.1387	0.0324597	0.0483491
00625 Chloroalkane and chloroalkene degradation [PATH:ko00625]	75684.8	-0.261068	0.0451188	-5.78624	7.2e-09	2.27e-08	86219.4	-0.306152	0.0375333	-8.15681	3.44e-16	2.01e-15	80674.3	-0.252586	0.0432576	-5.83911	5.25e-09	1.82e-08
00626 Naphthalene degradation [PATH:ko00626]	69839.8	-0.180701	0.0451881	-3.99887	6.36e-05	0.000136934	79378.6	-0.231633	0.0392394	-5.90307	3.57e-09	1.05e-08	74133.7	-0.185319	0.0460162	-4.02726	5.64e-05	0.000129245
00627 Aminobenzoate degradation [PATH:ko00627]	107103	-0.33813	0.045786	-7.385	1.52e-13	6.84e-13	122077	-0.382808	0.0395594	-9.67678	3.78e-22	3.93e-21	113945	-0.335594	0.044301	-7.57532	3.58e-14	1.98e-13
00630 Glyoxylate and dicarboxylate metabolism [PATH:ko00630]	146059	-0.094438	0.0361097	-2.61531	0.00891459	0.0141175	168696	-0.0954548	0.0370491	-2.57644	0.00998242	0.01575	156255	-0.0755619	0.0361446	-2.09055	0.0365686	0.0536038
00633 Nitrotoluene degradation [PATH:ko00633]	1439.32	-0.464644	0.135561	-3.42756	0.000609031	0.00111831	1632.2	-0.529819	0.136603	-3.87852	0.000105094	0.000214211	1508.24	-0.515317	0.160759	-3.20553	0.00134816	0.00250793
00640 Propanoate metabolism [PATH:ko00640]	106177	0.0936015	0.0363699	2.5736	0.0100648	0.0158214	123172	0.104906	0.0385682	2.72001	0.00652809	0.010655	113813	0.11681	0.0376639	3.10137	0.00192629	0.0034479
00642 Ethylbenzene degradation [PATH:ko00642]	187.083	2.53776	0.427056	5.94246	2.81e-09	9.27e-09	199.467	2.40109	0.415689	5.77616	7.64e-09	2.16e-08	193.082	2.48553	0.473521	5.24903	1.53e-07	4.65e-07
00643 Styrene degradation [PATH:ko00643]	38187	-0.442135	0.0522752	-8.45784	2.72e-17	1.63e-16	43651.9	-0.478651	0.0477078	-10.033	1.09e-23	1.33e-22	40535.6	-0.447148	0.0523931	-8.53447	1.41e-17	1.15e-16
00650 Butanoate metabolism [PATH:ko00650]	137721	-0.0735951	0.0434681	-1.69308	0.0904398	0.11928	157645	-0.101294	0.0406521	-2.49173	0.0127124	0.0195505	146400	-0.0736762	0.0426664	-1.7268	0.0842038	0.114238
00660 C5-Branched dibasic acid metabolism [PATH:ko00660]	28620	-0.3036	0.0639027	-4.75097	2.02e-06	4.99e-06	32644.1	-0.345332	0.0574902	-6.0068	1.89e-09	5.76e-09	30287.7	-0.318205	0.0625041	-5.09094	3.56e-07	1.03e-06
00670 One carbon pool by folate [PATH:ko00670]	42961.5	0.397281	0.0341776	11.624	3.11e-31	5.1e-30	50649.5	0.448263	0.0457525	9.79755	1.15e-22	1.29e-21	46757.5	0.45678	0.0445869	10.2447	1.25e-24	1.97e-23
00680 Methane metabolism [PATH:ko00680]	101926	0.0222521	0.0330079	0.674145	0.500219	0.558005	117724	0.02131	0.035383	0.602266	0.546997	0.610002	109019	0.0397932	0.0348477	1.14192	0.253487	0.313911
00710 Carbon fixation in photosynthetic organisms [PATH:ko00710]	65028.2	0.312122	0.0305893	10.2036	1.91e-24	2.26e-23	75863.8	0.337295	0.0385834	8.74197	2.29e-18	1.71e-17	70110	0.348799	0.0369082	9.45045	3.37e-21	3.99e-20
00720 Carbon fixation pathways in prokaryotes [PATH:ko00720]	40785.6	0.404032	0.0386866	10.4437	1.57e-25	1.96e-24	47271.3	0.412087	0.0419296	9.82808	8.52e-23	9.81e-22	43997.8	0.4411	0.0400951	11.0013	3.76e-28	6.97e-27
00730 Thiamine metabolism [PATH:ko00730]	38198.6	-0.110724	0.0363431	-3.04664	0.00231414	0.00395913	44396.7	-0.0930881	0.0393424	-2.3661	0.0179765	0.0269647	40694.3	-0.104236	0.0421128	-2.47516	0.0133177	0.0214899
00740 Riboflavin metabolism [PATH:ko00740]	39134	-0.00928642	0.0456169	-0.203574	0.838686	0.852698	45636	0.0175692	0.0475969	0.369125	0.712035	0.765977	42193.8	0.0315889	0.0473777	0.666746	0.504935	0.578232
00750 Vitamin B6 metabolism [PATH:ko00750]	19334.6	0.140272	0.0486351	2.88417	0.00392452	0.006455	22536	0.164322	0.0493826	3.32752	0.000876228	0.0015884	20664.4	0.155203	0.0540435	2.87182	0.00408114	0.00712527
00760 Nicotinate and nicotinamide metabolism [PATH:ko00760]	80331.6	-0.0158613	0.0300825	-0.52726	0.598013	0.648228	93152.5	-0.00529613	0.0355362	-0.149035	0.881526	0.907077	86084.2	0.00739065	0.0345541	0.213886	0.830636	0.858125
00770 Pantothenate and CoA biosynthesis [PATH:ko00770]	105009	-0.167413	0.0368689	-4.54076	5.61e-06	1.36e-05	120883	-0.178619	0.0369182	-4.83824	1.31e-06	3.19e-06	111983	-0.157749	0.037628	-4.19231	2.76e-05	6.53e-05
00780 Biotin metabolism [PATH:ko00780]	58170.6	-0.336748	0.0526291	-6.39852	1.57e-10	5.57e-10	66462.2	-0.373441	0.0481207	-7.7605	8.46e-15	4.05e-14	61665.6	-0.34591	0.0516826	-6.69296	2.19e-11	9.32e-11
00785 Lipoic acid metabolism [PATH:ko00785]	6394.43	-0.349373	0.0863627	-4.04542	5.22e-05	0.00011352	7456.87	-0.319047	0.0802438	-3.97598	7.01e-05	0.000145653	6842.56	-0.327453	0.0895699	-3.65584	0.000256345	0.000535308
00790 Folate biosynthesis [PATH:ko00790]	52143.7	-0.219743	0.0385868	-5.69478	1.24e-08	3.73e-08	60029.9	-0.23108	0.0404107	-5.71828	1.08e-08	3.02e-08	55149.3	-0.235807	0.0421	-5.60112	2.13e-08	6.98e-08
00791 Atrazine degradation [PATH:ko00791]	14757.5	-0.433415	0.0744028	-5.82526	5.7e-09	1.81e-08	17017.3	-0.439809	0.0669063	-6.57352	4.91e-11	1.82e-10	15768.8	-0.415894	0.0715061	-5.8162	6.02e-09	2.07e-08
00830 Retinol metabolism [PATH:ko00830]	60106.7	-0.418533	0.0420076	-9.96327	2.21e-23	2.29e-22	68963.7	-0.442102	0.0403689	-10.9515	6.53e-28	1.11e-26	63906.9	-0.418008	0.0432452	-9.66599	4.21e-22	5.43e-21
00860 Porphyrin and chlorophyll metabolism [PATH:ko00860]	54817.9	0.0108972	0.0300981	0.362056	0.717311	0.747125	63449.6	0.0159715	0.0354719	0.450259	0.652524	0.712757	58404.8	0.0173029	0.0368528	0.469513	0.638703	0.695876
00900 Terpenoid backbone biosynthesis [PATH:ko00900]	51131.9	-0.0218197	0.0307194	-0.71029	0.477524	0.536742	59240.7	-0.0139392	0.0358559	-0.388757	0.697456	0.754102	54397.2	-0.0196637	0.03761	-0.522833	0.601091	0.65996
00901 Indole alkaloid biosynthesis [PATH:ko00901]	12209.9	-0.267173	0.0601047	-4.44514	8.78e-06	2.09e-05	13773.9	-0.344029	0.0538496	-6.38869	1.67e-10	5.7e-10	12899.3	-0.287366	0.0691175	-4.15765	3.22e-05	7.57e-05
00902 Monoterpenoid biosynthesis [PATH:ko00902]	432.469	-1.38108	0.243306	-5.67633	1.38e-08	4.07e-08	504.897	-1.32751	0.238877	-5.55729	2.74e-08	7.34e-08	463.847	-1.33439	0.281804	-4.73518	2.19e-06	5.86e-06
00903 Limonene and pinene degradation [PATH:ko00903]	41927.4	-0.114635	0.0461342	-2.4848	0.0129623	0.019863	47757.5	-0.157586	0.038219	-4.12323	3.74e-05	7.92e-05	44762.8	-0.101863	0.0447747	-2.27502	0.0229046	0.0353528
00904 Diterpenoid biosynthesis [PATH:ko00904]	15686.8	-0.712435	0.0561847	-12.6802	7.61e-37	1.62e-35	18008.5	-0.736728	0.0531873	-13.8516	1.24e-43	4.42e-42	16691.6	-0.708876	0.0594875	-11.9164	9.72e-33	2.18e-31
00905 Brassinosteroid biosynthesis [PATH:ko00905]	1.27	-3.83556	4.82882	-0.794306	0.427017	0.489004	1.468	-4.24951	4.69351	-0.905401	0.365253	0.431019	1.35039	-4.01093	4.82883	-0.830622	0.406187	0.479324
00906 Carotenoid biosynthesis [PATH:ko00906]	9275.18	0.0884946	0.0596865	1.48266	0.138166	0.175697	10525.7	0.0377263	0.0625657	0.602987	0.546518	0.610002	9729.58	0.05061	0.0724104	0.698934	0.484594	0.559449
00908 Zeatin biosynthesis [PATH:ko00908]	3212.82	0.00721452	0.0967105	0.0745991	0.940534	0.94497	3735.73	0.0254288	0.0951162	0.267345	0.789204	0.828448	3438.66	0.0267147	0.109243	0.244543	0.80681	0.846554
00909 Sesquiterpenoid and triterpenoid biosynthesis [PATH:ko00909]	10870.1	-0.357722	0.0666675	-5.36577	8.06e-08	2.22e-07	12355.3	-0.411837	0.0597381	-6.89405	5.42e-12	2.1e-11	11539.6	-0.362406	0.0707945	-5.11913	3.07e-07	9.08e-07
00910 Nitrogen metabolism [PATH:ko00910]	60195.2	-0.204368	0.0335082	-6.09904	1.07e-09	3.58e-09	69069.1	-0.225926	0.0353957	-6.38286	1.74e-10	5.83e-10	63930.3	-0.20736	0.0386304	-5.36779	7.97e-08	2.46e-07
00920 Sulfur metabolism [PATH:ko00920]	67731.3	0.274939	0.0361646	7.60243	2.91e-14	1.41e-13	78611.7	0.28696	0.0395313	7.25906	3.9e-13	1.61e-12	72895.5	0.307401	0.0377687	8.13904	3.98e-16	2.78e-15
00930 Caprolactam degradation [PATH:ko00930]	30551.1	-0.214899	0.0520154	-4.13146	3.6e-05	8.04e-05	34423.2	-0.294258	0.0486807	-6.04465	1.5e-09	4.73e-09	32113	-0.250487	0.0594525	-4.21323	2.52e-05	6.02e-05
00940 Phenylpropanoid biosynthesis [PATH:ko00940]	87438.2	-0.214274	0.0371378	-5.76969	7.94e-09	2.47e-08	99146.1	-0.273441	0.0343386	-7.96307	1.68e-15	8.83e-15	92415.3	-0.232475	0.0435145	-5.34247	9.17e-08	2.81e-07
00941 Flavonoid biosynthesis [PATH:ko00941]	2649.99	-0.20136	0.100513	-2.00331	0.0451437	0.0641041	3003.3	-0.261769	0.101283	-2.58453	0.00975124	0.0154425	2788.11	-0.234185	0.120225	-1.94789	0.0514284	0.073766
00942 Anthocyanin biosynthesis [PATH:ko00942]	4.46	0.462637	2.17271	0.212931	0.831381	0.847293	5.508	0.621664	2.15402	0.288606	0.772883	0.816993	4.75432	0.466564	2.56647	0.181792	0.855746	0.874215
00943 Isoflavonoid biosynthesis [PATH:ko00943]	5.477	-4.49271	2.53696	-1.7709	0.0765774	0.102908	6.516	-3.85498	2.19507	-1.7562	0.0790548	0.104588	5.77616	-4.71	2.80542	-1.6789	0.0931724	0.12521
00944 Flavone and flavonol biosynthesis [PATH:ko00944]	1713.88	-0.259502	0.13907	-1.86598	0.0620436	0.0858397	1890.85	-0.409153	0.125449	-3.2615	0.00110826	0.0019837	1803.82	-0.292151	0.158526	-1.84293	0.0653394	0.0912609
00945 Stilbenoid, diarylheptanoid and gingerol biosynthesis [PATH:ko00945]	2487.23	-0.229205	0.102167	-2.24343	0.0248691	0.0366583	2834.98	-0.272216	0.103799	-2.62252	0.00872819	0.0139259	2618.42	-0.260482	0.121944	-2.13608	0.0326726	0.0484966
00950 Isoquinoline alkaloid biosynthesis [PATH:ko00950]	52455.4	-0.260672	0.0400863	-6.50277	7.89e-11	2.9e-10	59943.1	-0.295754	0.0390414	-7.5754	3.58e-14	1.64e-13	55611.1	-0.26941	0.0438983	-6.13714	8.4e-10	3.06e-09
00960 Tropane, piperidine and pyridine alkaloid biosynthesis [PATH:ko00960]	35751	-0.135491	0.0368523	-3.6766	0.000236361	0.00045977	41185.2	-0.144317	0.0392525	-3.67664	0.00023633	0.00045762	38076.7	-0.129792	0.0421012	-3.08286	0.00205023	0.00365438
00965 Betalain biosynthesis [PATH:ko00965]	18987.5	-0.292057	0.0557073	-5.24271	1.58e-07	4.24e-07	21744.1	-0.320649	0.0535121	-5.99209	2.07e-09	6.26e-09	20090.4	-0.307244	0.0591171	-5.19722	2.02e-07	6.11e-07
00966 Glucosinolate biosynthesis [PATH:ko00966]	12698	-0.48125	0.0666188	-7.22393	5.05e-13	2.2e-12	14413.2	-0.543236	0.062854	-8.64282	5.48e-18	3.83e-17	13372.6	-0.514189	0.0724911	-7.09313	1.31e-12	6.35e-12
00970 Aminoacyl-tRNA biosynthesis [PATH:ko00970]	145064	0.234257	0.0270597	8.65706	4.84e-18	3.03e-17	169269	0.260462	0.0363105	7.17317	7.33e-13	3e-12	156476	0.272985	0.0330528	8.25905	1.47e-16	1.14e-15
00980 Metabolism of xenobiotics by cytochrome P450 [PATH:ko00980]	43452.1	-0.437255	0.0563223	-7.76344	8.27e-15	4.19e-14	49478.5	-0.487076	0.0504045	-9.66333	4.32e-22	4.38e-21	46014.3	-0.450409	0.0558759	-8.06087	7.58e-16	5.04e-15
00981 Insect hormone biosynthesis [PATH:ko00981]	33171.3	-0.0789967	0.0496701	-1.59043	0.111738	0.143808	37836.9	-0.117091	0.0411116	-2.84811	0.0043979	0.00734709	35546.8	-0.0553871	0.0459283	-1.20595	0.227838	0.286309
00982 Drug metabolism - cytochrome P450 [PATH:ko00982]	46811.6	-0.410602	0.0449742	-9.12973	6.87e-20	4.8e-19	53333	-0.458043	0.0405815	-11.287	1.52e-29	2.82e-28	49657.3	-0.417874	0.0474792	-8.80119	1.35e-18	1.37e-17
00983 Drug metabolism - other enzymes [PATH:ko00983]	54369.6	0.29023	0.0470659	6.16646	6.98e-10	2.38e-09	61617.3	0.239319	0.0362904	6.59455	4.27e-11	1.59e-10	58110.2	0.304226	0.0440072	6.9131	4.74e-12	2.2e-11
00984 Steroid degradation [PATH:ko00984]	2032.39	-1.14081	0.11828	-9.64501	5.16e-22	4.78e-21	2334.57	-1.16824	0.116362	-10.0397	1.02e-23	1.32e-22	2151.88	-1.16026	0.135697	-8.55032	1.23e-17	1.03e-16
00997 Biosynthesis of various secondary metabolites - part 3 [PATH:ko00997]	910.351	-1.37937	0.176404	-7.81935	5.31e-15	2.76e-14	1052.82	-1.37726	0.170554	-8.0752	6.74e-16	3.78e-15	952.039	-1.46806	0.197874	-7.41919	1.18e-13	5.98e-13
00998 Biosynthesis of various secondary metabolites - part 2 [PATH:ko00998]	28175.7	0.16969	0.0745362	2.27662	0.0228091	0.033856	31541	0.0821813	0.0614891	1.33652	0.18138	0.232036	29815.3	0.156826	0.0715852	2.19076	0.0284694	0.0427326
00999 Biosynthesis of various secondary metabolites - part 1 [PATH:ko00999]	18200.4	0.168714	0.0539902	3.12491	0.0017786	0.00310525	20577.1	0.109139	0.0478249	2.28204	0.0224867	0.032806	19291.1	0.160408	0.059164	2.71125	0.00670307	0.0111981
01001 Protein kinases [BR:ko01001]	366085	-0.00874984	0.0229474	-0.3813	0.702981	0.737065	422998	-0.00868471	0.0296334	-0.293072	0.769467	0.816745	388112	-0.0166799	0.0289692	-0.575782	0.564762	0.632731
01002 Peptidases and inhibitors [BR:ko01002]	512687	0.0913217	0.0234746	3.89023	0.00010015	0.000210036	596167	0.1091	0.0315893	3.45372	0.000552914	0.00102856	549256	0.112892	0.0296448	3.80816	0.000140002	0.000307427
01003 Glycosyltransferases [BR:ko01003]	187662	-0.0434748	0.0300516	-1.44667	0.147989	0.187072	219646	-0.00585755	0.0367875	-0.159227	0.87349	0.903172	201846	-0.00928572	0.0363404	-0.255521	0.798321	0.839715
01004 Lipid biosynthesis proteins [BR:ko01004]	157695	-0.0329444	0.0361149	-0.912209	0.361659	0.4198	181532	-0.0436606	0.0366024	-1.19284	0.232934	0.292713	167832	-0.0295558	0.0371238	-0.79614	0.425951	0.499876
01005 Lipopolysaccharide biosynthesis proteins [BR:ko01005]	1757.15	-0.631924	0.146091	-4.32556	1.52e-05	3.48e-05	2097.77	-0.51505	0.130279	-3.95344	7.7e-05	0.000158537	1886.81	-0.594231	0.158314	-3.75349	0.00017439	0.000373317
01006 Prenyltransferases [BR:ko01006]	39395.8	-0.133196	0.0343991	-3.87208	0.000107909	0.000223152	45777.2	-0.116242	0.0384215	-3.02543	0.00248279	0.00424767	41954.6	-0.127852	0.0411052	-3.11036	0.00186859	0.00335873
01007 Amino acid related enzymes [BR:ko01007]	215699	0.167133	0.0255804	6.53364	6.42e-11	2.4e-10	250774	0.184033	0.0332553	5.53393	3.13e-08	8.29e-08	231609	0.194378	0.0307234	6.32671	2.5e-10	9.7e-10
01008 Polyketide biosynthesis proteins [BR:ko01008]	122374	-0.37449	0.0396981	-9.43344	3.97e-21	3.19e-20	138394	-0.446488	0.0326852	-13.6603	1.75e-42	5.74e-41	129417	-0.391865	0.0448623	-8.73483	2.44e-18	2.31e-17
01009 Protein phosphatases and associated proteins [BR:ko01009]	304389	0.0577221	0.0237753	2.42781	0.0151901	0.0230284	352354	0.0629646	0.0304069	2.07073	0.0383839	0.0530894	324733	0.0677065	0.0293827	2.3043	0.0212058	0.0332121
01011 Peptidoglycan biosynthesis and degradation proteins [BR:ko01011]	9201.17	-1.15545	0.0586428	-19.7032	2.02e-86	2.87e-84	10598	-1.17017	0.0602527	-19.421	5.13e-84	1.09e-81	9745.25	-1.17307	0.0682652	-17.184	3.5e-66	3.73e-64
01040 Biosynthesis of unsaturated fatty acids [PATH:ko01040]	40729.4	0.0870083	0.0470553	1.84907	0.0644482	0.0879966	47431.8	0.109073	0.0461378	2.36408	0.0180748	0.0270171	43511	0.100881	0.048398	2.08441	0.0371224	0.0541581
01051 Biosynthesis of ansamycins [PATH:ko01051]	2132.26	0.368953	0.129178	2.85616	0.00428804	0.00699888	2437.59	0.342214	0.120307	2.84452	0.0044479	0.00740158	2284.47	0.389128	0.137477	2.83049	0.00464772	0.00798358
01052 Type I polyketide structures [PATH:ko01052]	2546.26	-0.274374	0.103023	-2.66323	0.00773949	0.0123023	2896.51	-0.324322	0.102697	-3.15806	0.00158824	0.00280743	2689.01	-0.296007	0.121396	-2.43836	0.0147541	0.0237179
01053 Biosynthesis of siderophore group nonribosomal peptides [PATH:ko01053]	7427.49	-0.350825	0.094618	-3.70781	0.000209063	0.00041232	8205.4	-0.501898	0.0678974	-7.39201	1.45e-13	6.1e-13	7854.33	-0.36867	0.0975135	-3.7807	0.000156385	0.000339898
01054 Nonribosomal peptide structures [PATH:ko01054]	3896.87	-0.170083	0.102628	-1.65728	0.0974627	0.127751	4407.01	-0.237424	0.106335	-2.2328	0.0255623	0.0365742	3985.4	-0.292532	0.112251	-2.60605	0.00915941	0.0150073
01055 Biosynthesis of vancomycin group antibiotics [PATH:ko01055]	165.708	2.69228	0.432129	6.23027	4.66e-10	1.63e-09	252.224	3.14295	0.381093	8.2472	1.62e-16	1.03e-15	210.438	2.98583	0.480534	6.21358	5.18e-10	1.94e-09
01056 Biosynthesis of type II polyketide backbone [PATH:ko01056]	0	NA	NA	NA	NA	NA	0	NA	NA	NA	NA	NA	0	NA	NA	NA	NA	NA
01057 Biosynthesis of type II polyketide products [PATH:ko01057]	2932.02	-0.752843	0.101542	-7.41408	1.22e-13	5.61e-13	3343.52	-0.803727	0.0980627	-8.19605	2.48e-16	1.52e-15	3106.04	-0.766676	0.115692	-6.62686	3.43e-11	1.4e-10
01059 Biosynthesis of enediyne antibiotics [PATH:ko01059]	8048.25	-1.23448	0.0819204	-15.0692	2.58e-51	1.1e-49	9151.65	-1.3128	0.0740915	-17.7187	3.01e-70	4.27e-68	8502.9	-1.26514	0.0874459	-14.4676	1.94e-47	9.18e-46
01504 Antimicrobial resistance genes [BR:ko01504]	7180.53	-0.294661	0.0797596	-3.69437	0.000220436	0.000432746	8357.41	-0.271219	0.0745352	-3.6388	0.000273911	0.000525613	7657.07	-0.284424	0.0835065	-3.40601	0.000659193	0.00127234
02000 Transporters [BR:ko02000]	836527	-0.340357	0.0303726	-11.2061	3.81e-29	5.41e-28	975556	-0.310149	0.0341532	-9.0811	1.07e-19	9.16e-19	894509	-0.321216	0.0341714	-9.40013	5.45e-21	6.27e-20
02010 ABC transporters [PATH:ko02010]	136288	-0.142183	0.0323444	-4.39591	1.1e-05	2.6e-05	156120	-0.168514	0.0346779	-4.8594	1.18e-06	2.88e-06	144394	-0.152578	0.0369971	-4.12406	3.72e-05	8.67e-05
02020 Two-component system [PATH:ko02020]	91633.9	-0.156966	0.0278884	-5.62837	1.82e-08	5.34e-08	105202	-0.176584	0.033815	-5.22207	1.77e-07	4.46e-07	96918.4	-0.172658	0.0355584	-4.85563	1.2e-06	3.28e-06
02022 Two-component system [BR:ko02022]	57019.6	-0.12118	0.0309128	-3.92005	8.85e-05	0.00018857	65535.1	-0.137138	0.03635	-3.77273	0.000161473	0.000321436	60260	-0.139054	0.0382321	-3.63711	0.000275714	0.000572946
02024 Quorum sensing [PATH:ko02024]	52789.3	-0.159772	0.0313373	-5.09847	3.42e-07	8.79e-07	60875.7	-0.165862	0.0366294	-4.52811	5.95e-06	1.37e-05	55821.7	-0.176184	0.0379372	-4.6441	3.42e-06	8.93e-06
02025 Biofilm formation - Pseudomonas aeruginosa [PATH:ko02025]	12366.2	-0.026587	0.0624006	-0.426069	0.670057	0.713611	14204.6	-0.0437472	0.0606281	-0.721567	0.47056	0.534557	13043	-0.0497162	0.0666581	-0.745839	0.455764	0.529035
02026 Biofilm formation - Escherichia coli [PATH:ko02026]	9393.16	-0.214621	0.075069	-2.85899	0.00424993	0.00696334	10776.5	-0.236886	0.0711614	-3.32885	0.000872042	0.00158756	9871.11	-0.250972	0.0778131	-3.22531	0.00125835	0.00235113
02030 Bacterial chemotaxis [PATH:ko02030]	281.062	0.298664	0.386754	0.772233	0.439977	0.50115	291.778	0.00426877	0.369751	0.011545	0.990789	0.99312	281.073	0.13118	0.425246	0.30848	0.757717	0.808992
02035 Bacterial motility proteins [BR:ko02035]	532.026	0.150205	0.318723	0.47127	0.637448	0.687476	550.922	-0.167683	0.296673	-0.56521	0.571931	0.636142	533.206	-0.0190258	0.342883	-0.0554876	0.95575	0.964809
02040 Flagellar assembly [PATH:ko02040]	231.126	0.299929	0.410999	0.729756	0.46554	0.526047	235.291	-0.051657	0.405149	-0.127501	0.898544	0.922361	227.359	0.0858978	0.467613	0.183694	0.854254	0.874215
02042 Bacterial toxins [BR:ko02042]	6927.81	-0.95152	0.0643953	-14.7762	2.09e-49	8.08e-48	7991.24	-0.959019	0.0664218	-14.4383	2.97e-47	1.27e-45	7323.11	-0.976071	0.0754699	-12.9333	2.92e-38	8.3e-37
02044 Secretion system [BR:ko02044]	39828.4	0.0208107	0.0341039	0.610216	0.541718	0.597855	46362.7	0.0419856	0.0377039	1.11356	0.265468	0.331641	42411.3	0.0256617	0.0408373	0.62839	0.529749	0.601795
02048 Prokaryotic defense system [BR:ko02048]	8719.09	-0.471397	0.0579526	-8.13417	4.15e-16	2.24e-15	10109.7	-0.459565	0.0595893	-7.7122	1.24e-14	5.85e-14	9254.89	-0.476708	0.0680101	-7.00937	2.39e-12	1.13e-11
02060 Phosphotransferase system (PTS) [PATH:ko02060]	132.981	-1.90056	0.517502	-3.67255	0.000240138	0.000462891	148.626	-2.15095	0.502488	-4.2806	1.86e-05	4.14e-05	136.062	-2.19529	0.575152	-3.81688	0.00013515	0.00029831
03000 Transcription factors [BR:ko03000]	290771	-0.233709	0.0261296	-8.94425	3.74e-19	2.53e-18	338884	-0.206676	0.0320168	-6.45523	1.08e-10	3.8e-10	310768	-0.216909	0.0322926	-6.717	1.86e-11	8.06e-11
03008 Ribosome biogenesis in eukaryotes [PATH:ko03008]	202339	0.238151	0.0241438	9.86387	5.97e-23	5.91e-22	236868	0.272854	0.0349625	7.80418	5.99e-15	2.9e-14	218027	0.274024	0.0334384	8.1949	2.51e-16	1.84e-15
03009 Ribosome biogenesis [BR:ko03009]	692761	0.265146	0.0227478	11.6559	2.14e-31	3.65e-30	810465	0.297885	0.0342465	8.69828	3.37e-18	2.39e-17	747294	0.30356	0.0311979	9.73015	2.24e-22	2.99e-21
03010 Ribosome [PATH:ko03010]	147878	0.47974	0.0340966	14.07	5.81e-45	1.55e-43	176842	0.563883	0.0366406	15.3896	1.92e-53	1.36e-51	159941	0.522277	0.0456139	11.4499	2.35e-30	4.77e-29
03011 Ribosome [BR:ko03011]	167621	0.392528	0.0338364	11.6007	4.09e-31	6.45e-30	200148	0.475059	0.0364507	13.0329	7.95e-39	2.26e-37	181165	0.434383	0.0450014	9.65266	4.79e-22	6e-21
03012 Translation factors [BR:ko03012]	218651	0.306253	0.0239237	12.8012	1.61e-37	3.62e-36	255288	0.333399	0.033536	9.94153	2.75e-23	3.25e-22	235086	0.335691	0.0319127	10.519	7.06e-26	1.16e-24
03013 Nucleocytoplasmic transport [PATH:ko03013]	190694	0.165204	0.0257179	6.42369	1.33e-10	4.76e-10	222304	0.1894	0.0337736	5.60792	2.05e-08	5.59e-08	204634	0.19077	0.0325655	5.85805	4.68e-09	1.64e-08
03015 mRNA surveillance pathway [PATH:ko03015]	140399	0.0561614	0.0253542	2.21507	0.026755	0.0393022	163411	0.0767692	0.0327144	2.34665	0.0189431	0.0281929	150161	0.0733036	0.0325885	2.24937	0.0244888	0.0375261
03016 Transfer RNA biogenesis [BR:ko03016]	396501	0.0787146	0.0226028	3.48252	0.000496721	0.000924031	463330	0.110254	0.0326655	3.37524	0.000737516	0.00134842	425876	0.107565	0.0315842	3.40565	0.000660061	0.00127234
03018 RNA degradation [PATH:ko03018]	153322	0.396892	0.027161	14.6126	2.33e-48	8.29e-47	179779	0.434122	0.0388121	11.1852	4.82e-29	8.55e-28	166340	0.448243	0.0345258	12.9828	1.53e-38	4.66e-37
03019 Messenger RNA biogenesis [BR:ko03019]	599440	0.239849	0.0238542	10.0548	8.75e-24	9.81e-23	699940	0.267766	0.0342427	7.81967	5.3e-15	2.59e-14	646303	0.277249	0.0306024	9.0597	1.31e-19	1.39e-18
03020 RNA polymerase [PATH:ko03020]	65601.6	0.623557	0.0324284	19.2288	2.13e-82	2.26e-80	78095.1	0.694018	0.0500002	13.8803	8.34e-44	3.23e-42	72377.3	0.711103	0.0453013	15.6972	1.58e-55	1.12e-53
03021 Transcription machinery [BR:ko03021]	427317	0.176401	0.023083	7.642	2.14e-14	1.05e-13	501383	0.217928	0.036222	6.01644	1.78e-09	5.46e-09	462083	0.222483	0.0333836	6.66443	2.66e-11	1.1e-10
03022 Basal transcription factors [PATH:ko03022]	75760.2	0.29018	0.0295142	9.8319	8.21e-23	7.94e-22	89280.5	0.341676	0.0432921	7.89235	2.97e-15	1.49e-14	82487.9	0.352555	0.0403036	8.7475	2.18e-18	2.16e-17
03029 Mitochondrial biogenesis [BR:ko03029]	548690	0.218698	0.0224185	9.75526	1.75e-22	1.66e-21	643107	0.256836	0.0346895	7.40386	1.32e-13	5.64e-13	592109	0.258697	0.0324387	7.97495	1.52e-15	9.84e-15
03030 DNA replication [PATH:ko03030]	122502	0.358065	0.0287459	12.4562	1.29e-35	2.51e-34	143285	0.38945	0.0388036	10.0364	1.05e-23	1.32e-22	132741	0.406939	0.034294	11.8662	1.77e-32	3.78e-31
03032 DNA replication proteins [BR:ko03032]	284946	0.20593	0.0259777	7.92721	2.24e-15	1.18e-14	331885	0.227456	0.0344354	6.6053	3.97e-11	1.5e-10	306765	0.239774	0.031	7.73467	1.04e-14	6.13e-14
03036 Chromosome and associated proteins [BR:ko03036]	1.08786e+06	0.168485	0.0246775	6.82747	8.64e-12	3.41e-11	1.26037e+06	0.17589	0.0310651	5.66198	1.5e-08	4.17e-08	1.16613e+06	0.191076	0.0279304	6.84115	7.86e-12	3.45e-11
03040 Spliceosome [PATH:ko03040]	271073	0.394169	0.0260259	15.1453	8.14e-52	3.85e-50	316866	0.423597	0.0363311	11.6593	2.06e-31	4.38e-30	293262	0.438452	0.0317662	13.8025	2.46e-43	1.05e-41
03041 Spliceosome [BR:ko03041]	471671	0.288932	0.0255748	11.2975	1.35e-29	1.98e-28	549578	0.310905	0.0344312	9.02976	1.72e-19	1.44e-18	508750	0.326828	0.029829	10.9567	6.17e-28	1.1e-26
03050 Proteasome [PATH:ko03050]	104943	0.277171	0.0302226	9.17098	4.69e-20	3.33e-19	122721	0.308793	0.037685	8.19406	2.53e-16	1.52e-15	113096	0.313087	0.0364744	8.58374	9.18e-18	7.98e-17
03051 Proteasome [BR:ko03051]	154433	0.289497	0.0273357	10.5904	3.3e-26	4.26e-25	180739	0.323022	0.0361415	8.93772	3.97e-19	3.25e-18	166440	0.325387	0.0347399	9.36637	7.51e-21	8.42e-20
03060 Protein export [PATH:ko03060]	34850	0.0746445	0.0404216	1.84665	0.0647982	0.0881918	40793	0.111022	0.0431214	2.57464	0.0100344	0.0157737	37363.7	0.0986527	0.0465348	2.11998	0.034008	0.0501295
03070 Bacterial secretion system [PATH:ko03070]	6082.37	0.0730771	0.0685287	1.06637	0.286256	0.343099	7005.64	0.0642847	0.0697258	0.921963	0.356548	0.421915	6464.9	0.0725056	0.0800302	0.905977	0.364948	0.437937
03110 Chaperones and folding catalysts [BR:ko03110]	318626	0.308731	0.0250122	12.3432	5.3e-35	9.82e-34	373397	0.345428	0.0368392	9.37665	6.81e-21	6.31e-20	344871	0.355356	0.0330307	10.7584	5.41e-27	9.22e-26
03200 Viral proteins [BR:ko03200]	1323.71	1.04891	0.183871	5.7046	1.17e-08	3.57e-08	1511.14	1.02237	0.169463	6.03302	1.61e-09	4.97e-09	1352.5	0.962292	0.190535	5.05048	4.41e-07	1.26e-06
03210 Viral fusion proteins [BR:ko03210]	0	NA	NA	NA	NA	NA	0	NA	NA	NA	NA	NA	0	NA	NA	NA	NA	NA
03230 Viral genome structure [PATH:ko03230]	904.667	1.72669	0.204973	8.42399	3.64e-17	2.13e-16	1030.51	1.69955	0.192247	8.84044	9.53e-19	7.38e-18	932.164	1.66682	0.220265	7.56734	3.81e-14	2.08e-13
03310 Nuclear receptors [BR:ko03310]	0	NA	NA	NA	NA	NA	0	NA	NA	NA	NA	NA	0	NA	NA	NA	NA	NA
03320 PPAR signaling pathway [PATH:ko03320]	69611.8	0.102955	0.0319434	3.22303	0.00126841	0.00227036	80504	0.105455	0.0355122	2.96954	0.00298247	0.00504179	73784.7	0.0947496	0.0365444	2.59273	0.00952189	0.0155415
03400 DNA repair and recombination proteins [BR:ko03400]	578074	-0.013259	0.0238975	-0.55483	0.579011	0.632458	668719	-0.00981276	0.0301223	-0.325764	0.744603	0.797339	617521	0.000775382	0.0283617	0.027339	0.978189	0.980491
03410 Base excision repair [PATH:ko03410]	57928.9	0.182978	0.031676	5.77656	7.62e-09	2.39e-08	67569.4	0.208689	0.0383191	5.44608	5.15e-08	1.35e-07	62242.6	0.211975	0.0384617	5.51132	3.56e-08	1.13e-07
03420 Nucleotide excision repair [PATH:ko03420]	113329	0.0995194	0.0270928	3.67328	0.000239457	0.000462891	132633	0.135165	0.0377459	3.58091	0.000342396	0.000639739	122356	0.142549	0.0354683	4.01905	5.84e-05	0.000133117
03430 Mismatch repair [PATH:ko03430]	75534.7	0.109599	0.028701	3.81864	0.00013419	0.000273516	87970.5	0.131649	0.0364076	3.61598	0.000299209	0.000570454	81116.8	0.137772	0.0356396	3.86571	0.000110765	0.000247046
03440 Homologous recombination [PATH:ko03440]	65137.8	-0.0376753	0.0295703	-1.27409	0.202631	0.249482	75348.9	-0.0342833	0.034559	-0.992022	0.321187	0.387608	69271.1	-0.0365875	0.035808	-1.02177	0.30689	0.37353
03450 Non-homologous end-joining [PATH:ko03450]	30258.2	-0.186742	0.03749	-4.98112	6.32e-07	1.6e-06	34901.3	-0.191906	0.0406374	-4.72239	2.33e-06	5.52e-06	32185.2	-0.184915	0.0438855	-4.21359	2.51e-05	6.02e-05
03460 Fanconi anemia pathway [PATH:ko03460]	79402.5	-0.0518391	0.0276933	-1.8719	0.0612208	0.085229	92140.2	-0.039232	0.0333777	-1.1754	0.239837	0.300501	84548.2	-0.0470277	0.0344197	-1.3663	0.171845	0.219837
04010 MAPK signaling pathway [PATH:ko04010]	79633.8	0.164689	0.0296756	5.54963	2.86e-08	8.24e-08	92871.7	0.189908	0.034194	5.55384	2.79e-08	7.44e-08	84941.8	0.173878	0.0361534	4.80943	1.51e-06	4.11e-06
04011 MAPK signaling pathway - yeast [PATH:ko04011]	246912	0.0439901	0.0236243	1.86207	0.0625938	0.0858397	287945	0.0701807	0.0314365	2.23246	0.0255847	0.0365742	264149	0.0619282	0.0315255	1.96438	0.0494855	0.0712191
04012 ErbB signaling pathway [PATH:ko04012]	28169.6	0.105438	0.0382148	2.75908	0.00579635	0.00928288	32477.3	0.0991875	0.0423309	2.34314	0.019122	0.0282847	29747.2	0.0866077	0.0451296	1.91909	0.0549729	0.0780616
04013 MAPK signaling pathway - fly [PATH:ko04013]	46853.2	-0.0316581	0.0334918	-0.94525	0.344531	0.405443	54725.8	-0.000301828	0.0365643	-0.00825471	0.993414	0.993414	49965.1	-0.0224296	0.0403899	-0.555327	0.578671	0.641607
04014 Ras signaling pathway [PATH:ko04014]	74690.9	-0.00947929	0.0301255	-0.31466	0.75302	0.780502	86574	-0.000420464	0.0339153	-0.0123975	0.990108	0.99312	79111.9	-0.0201219	0.034802	-0.578182	0.563141	0.632731
04015 Rap1 signaling pathway [PATH:ko04015]	25578.7	-0.0460791	0.0403423	-1.1422	0.25337	0.306635	29998	-0.00279486	0.0430704	-0.0648904	0.948261	0.961808	27378.9	-0.0258595	0.0491	-0.52667	0.598423	0.658729
04016 MAPK signaling pathway - plant [PATH:ko04016]	31790.8	-0.239815	0.0463183	-5.17755	2.25e-07	5.91e-07	36826.3	-0.231519	0.0463462	-4.99543	5.87e-07	1.45e-06	34028.2	-0.218133	0.048016	-4.54293	5.55e-06	1.42e-05
04020 Calcium signaling pathway [PATH:ko04020]	51197.7	0.095518	0.0319446	2.99012	0.0027887	0.00469561	59347.1	0.104685	0.0372562	2.80987	0.0049562	0.00821533	54837.1	0.116555	0.0374421	3.11293	0.00185237	0.00334369
04022 cGMP-PKG signaling pathway [PATH:ko04022]	48695.3	0.230304	0.0325094	7.08424	1.4e-12	5.84e-12	56519.9	0.242485	0.0379466	6.39017	1.66e-10	5.69e-10	52160.2	0.250579	0.038495	6.50939	7.55e-11	3e-10
04024 cAMP signaling pathway [PATH:ko04024]	60883.2	0.221486	0.0295835	7.4868	7.06e-14	3.3e-13	70586.1	0.230591	0.0351506	6.56009	5.38e-11	1.97e-10	64911.3	0.22928	0.0363006	6.31614	2.68e-10	1.03e-09
04030 G protein-coupled receptors [BR:ko04030]	1762.27	0.55325	0.141902	3.89881	9.67e-05	0.000203862	2251.9	0.789335	0.125699	6.27954	3.4e-10	1.1e-09	1970.88	0.675037	0.170991	3.9478	7.89e-05	0.000177777
04031 GTP-binding proteins [BR:ko04031]	58266.9	-0.126029	0.0343657	-3.66728	0.000245146	0.000470416	68304.4	-0.0827895	0.0362636	-2.28299	0.0224309	0.032806	62263.6	-0.11032	0.0410805	-2.68546	0.00724301	0.0120059
04040 Ion channels [BR:ko04040]	21697	-0.389274	0.0406315	-9.58061	9.65e-22	8.56e-21	25154.2	-0.37814	0.0437632	-8.6406	5.59e-18	3.84e-17	23049.5	-0.391578	0.0481463	-8.13309	4.18e-16	2.88e-15
04052 Cytokines and growth factors [BR:ko04052]	0	NA	NA	NA	NA	NA	0	NA	NA	NA	NA	NA	0	NA	NA	NA	NA	NA
04054 Pattern recognition receptors [BR:ko04054]	2234.32	-0.450948	0.115949	-3.88919	0.000100581	0.000210036	2548.56	-0.496869	0.120091	-4.13743	3.51e-05	7.48e-05	2298.83	-0.566856	0.131034	-4.32603	1.52e-05	3.76e-05
04062 Chemokine signaling pathway [PATH:ko04062]	42982	0.02016	0.0341136	0.590966	0.554543	0.608854	50015.5	0.0402213	0.0370596	1.08531	0.277784	0.345002	45681.4	0.0194247	0.0400352	0.48519	0.627542	0.687231
04064 NF-kappa B signaling pathway [PATH:ko04064]	15663.3	0.33111	0.0598318	5.53401	3.13e-08	8.95e-08	18241	0.351161	0.0562144	6.24682	4.19e-10	1.34e-09	16564.7	0.317473	0.061553	5.15772	2.5e-07	7.5e-07
04066 HIF-1 signaling pathway [PATH:ko04066]	67688.9	0.409377	0.0299662	13.6613	1.73e-42	4.33e-41	79038.2	0.436014	0.0384305	11.3455	7.81e-30	1.51e-28	73010.9	0.446072	0.0368595	12.1019	1.03e-33	2.44e-32
04068 FoxO signaling pathway [PATH:ko04068]	71773.6	-0.124615	0.0287766	-4.33042	1.49e-05	3.43e-05	83185.9	-0.115324	0.033949	-3.39696	0.000681381	0.00125657	76355.7	-0.1224	0.0351044	-3.48673	0.000488959	0.000982531
04070 Phosphatidylinositol signaling system [PATH:ko04070]	79843.3	0.234089	0.0286588	8.16813	3.13e-16	1.71e-15	93303.7	0.264227	0.0377821	6.99346	2.68e-12	1.08e-11	86054.7	0.270736	0.0364406	7.42952	1.09e-13	5.59e-13
04071 Sphingolipid signaling pathway [PATH:ko04071]	108028	-0.088707	0.0299738	-2.95948	0.00308155	0.00510794	125495	-0.0727775	0.0340779	-2.13562	0.0327104	0.0461411	115002	-0.0845916	0.0348396	-2.42803	0.0151809	0.0243123
04072 Phospholipase D signaling pathway [PATH:ko04072]	53536.9	0.007699	0.0328427	0.234421	0.814658	0.837072	62008.9	0.0145326	0.0364592	0.3986	0.690188	0.748143	56689.5	-0.00377381	0.0378508	-0.0997022	0.920581	0.93596
04075 Plant hormone signal transduction [PATH:ko04075]	2361.72	-0.433293	0.139439	-3.1074	0.0018874	0.00328177	2944.47	-0.187096	0.137214	-1.36353	0.172715	0.221616	2656.16	-0.247301	0.165035	-1.49848	0.134009	0.175655
04080 Neuroactive ligand-receptor interaction [PATH:ko04080]	1775.97	0.930328	0.141376	6.58054	4.69e-11	1.77e-10	2020.57	0.894611	0.141643	6.31593	2.69e-10	8.8e-10	1748.82	0.756876	0.147303	5.13822	2.77e-07	8.26e-07
04090 CD molecules [BR:ko04090]	40754.3	-0.19946	0.0350696	-5.68756	1.29e-08	3.84e-08	46590.3	-0.232677	0.0396155	-5.8734	4.27e-09	1.24e-08	43014	-0.22208	0.0439777	-5.04983	4.42e-07	1.26e-06
04091 Lectins [BR:ko04091]	19098	0.369186	0.0493814	7.47623	7.65e-14	3.54e-13	22603.4	0.430574	0.0580241	7.4206	1.17e-13	5.07e-13	20907.2	0.444074	0.0582479	7.62386	2.46e-14	1.38e-13
04110 Cell cycle [PATH:ko04110]	182905	0.266455	0.0265311	10.0431	9.85e-24	1.08e-22	213166	0.289243	0.0352975	8.19443	2.52e-16	1.52e-15	197167	0.30313	0.0317135	9.55837	1.2e-21	1.46e-20
04111 Cell cycle - yeast [PATH:ko04111]	313939	0.172591	0.0241551	7.1451	8.99e-13	3.83e-12	366170	0.198172	0.0339247	5.84153	5.17e-09	1.48e-08	337939	0.206508	0.030913	6.6803	2.38e-11	1.01e-10
04112 Cell cycle - Caulobacter [PATH:ko04112]	6507.12	-0.248081	0.0660695	-3.75485	0.000173444	0.000346889	7462.56	-0.27179	0.0682597	-3.98171	6.84e-05	0.000142882	6871.62	-0.269439	0.0785543	-3.42997	0.000603641	0.00118522
04113 Meiosis - yeast [PATH:ko04113]	276194	0.0570112	0.0235957	2.41617	0.0156849	0.0236942	323712	0.0971587	0.0351741	2.76223	0.00574086	0.00947909	297729	0.0962025	0.0338369	2.84312	0.00446738	0.00770488
04114 Oocyte meiosis [PATH:ko04114]	118626	0.192066	0.0274523	6.99636	2.63e-12	1.06e-11	138369	0.217695	0.0360696	6.0354	1.59e-09	4.93e-09	127748	0.226976	0.0338115	6.71299	1.91e-11	8.2e-11
04115 p53 signaling pathway [PATH:ko04115]	36304.5	-0.129479	0.0340172	-3.80628	0.000141071	0.000286173	41934.3	-0.130485	0.0386218	-3.37852	0.000728762	0.00133816	38516.2	-0.135684	0.0412082	-3.29265	0.000992464	0.00187075
04120 Ubiquitin mediated proteolysis [PATH:ko04120]	167431	0.078785	0.0312453	2.5215	0.0116856	0.018102	193993	0.0866754	0.0353671	2.45073	0.0142565	0.0216131	180043	0.110895	0.0318027	3.48695	0.000488556	0.000982531
04121 Ubiquitin system [BR:ko04121]	475979	0.0109569	0.0243369	0.450219	0.652552	0.701988	552253	0.0229183	0.0311532	0.735665	0.461935	0.526161	509249	0.0293414	0.0292508	1.0031	0.315814	0.382207
04122 Sulfur relay system [PATH:ko04122]	19810.6	0.0171807	0.0431027	0.3986	0.690188	0.725976	23151.9	0.0495578	0.0461408	1.07406	0.282797	0.349193	21175.2	0.0328878	0.0516947	0.636192	0.524651	0.597597
04130 SNARE interactions in vesicular transport [PATH:ko04130]	26904.5	0.128847	0.0415411	3.10168	0.00192425	0.00333225	31788.9	0.189974	0.0456222	4.16406	3.13e-05	6.69e-05	28993.7	0.166545	0.052225	3.18899	0.00142773	0.00263296
04131 Membrane trafficking [BR:ko04131]	1.23863e+06	0.0673322	0.0223579	3.01156	0.0025991	0.00441123	1.43737e+06	0.0795128	0.030193	2.63348	0.00845145	0.013535	1.3249e+06	0.0846766	0.0281192	3.01134	0.00260093	0.0045785
04136 Autophagy - other [PATH:ko04136]	63457.8	0.0281156	0.0291864	0.96331	0.335392	0.396881	73443.5	0.032853	0.0346042	0.949392	0.342421	0.409751	67497.4	0.0296779	0.0358669	0.827447	0.407984	0.480113
04137 Mitophagy - animal [PATH:ko04137]	45825.4	0.0973954	0.0317252	3.06997	0.0021408	0.00367734	53289.8	0.115257	0.0367094	3.13971	0.00169113	0.00297695	48852.5	0.105261	0.0390375	2.6964	0.00700927	0.0116639
04138 Autophagy - yeast [PATH:ko04138]	225848	0.0525211	0.0241163	2.17783	0.0294189	0.0429194	262485	0.0690511	0.0305189	2.26257	0.0236624	0.0344034	240658	0.0591949	0.0306015	1.93438	0.0530665	0.0756064
04139 Mitophagy - yeast [PATH:ko04139]	102882	0.254271	0.0267282	9.51322	1.85e-21	1.61e-20	120359	0.28706	0.0359086	7.9942	1.3e-15	7.03e-15	110685	0.285875	0.0355969	8.03088	9.68e-16	6.34e-15
04140 Autophagy - animal [PATH:ko04140]	111166	0.062494	0.0275091	2.27175	0.0231013	0.0341707	128911	0.0726345	0.032469	2.23705	0.0252834	0.0363876	118062	0.0597048	0.0330156	1.80838	0.0705476	0.0978934
04141 Protein processing in endoplasmic reticulum [PATH:ko04141]	249334	0.24863	0.0241449	10.2974	7.24e-25	8.81e-24	292212	0.286208	0.0362092	7.90429	2.69e-15	1.38e-14	269463	0.292187	0.0334158	8.74397	2.25e-18	2.18e-17
04142 Lysosome [PATH:ko04142]	131730	-0.135969	0.0277902	-4.89269	9.95e-07	2.48e-06	152128	-0.137438	0.0323731	-4.24546	2.18e-05	4.77e-05	140662	-0.122505	0.0318083	-3.85137	0.000117459	0.000260613
04144 Endocytosis [PATH:ko04144]	207626	0.199743	0.0243042	8.21848	2.06e-16	1.14e-15	243066	0.234987	0.0348601	6.74087	1.57e-11	5.99e-11	223661	0.235324	0.0335001	7.02458	2.15e-12	1.03e-11
04145 Phagosome [PATH:ko04145]	86485.2	0.258591	0.0272777	9.47995	2.54e-21	2.08e-20	101561	0.301293	0.0374252	8.05055	8.24e-16	4.56e-15	93262	0.296335	0.0380273	7.79269	6.56e-15	3.94e-14
04146 Peroxisome [PATH:ko04146]	195771	-0.030968	0.0339244	-0.912852	0.361321	0.4198	226250	-0.0302484	0.035701	-0.84727	0.396845	0.459794	208178	-0.0300707	0.035615	-0.844328	0.398486	0.472856
04147 Exosome [BR:ko04147]	707360	0.216105	0.0227419	9.50249	2.05e-21	1.71e-20	823070	0.234913	0.0315397	7.44817	9.46e-14	4.2e-13	758913	0.240684	0.0290617	8.28183	1.21e-16	9.75e-16
04150 mTOR signaling pathway [PATH:ko04150]	127578	0.104279	0.0275093	3.79068	0.000150237	0.000301891	148636	0.127245	0.0331992	3.83278	0.000126705	0.000255813	136250	0.117076	0.0339305	3.45047	0.000559605	0.0011088
04151 PI3K-Akt signaling pathway [PATH:ko04151]	98694.3	0.271882	0.0294437	9.23397	2.61e-20	1.95e-19	114930	0.292388	0.0347854	8.40546	4.26e-17	2.88e-16	105488	0.28613	0.0353739	8.08873	6.03e-16	4.08e-15
04152 AMPK signaling pathway [PATH:ko04152]	92886.6	0.252184	0.0272254	9.26282	1.99e-20	1.51e-19	108918	0.291068	0.0364896	7.97674	1.5e-15	8e-15	99986.9	0.285276	0.0371412	7.68085	1.58e-14	9.22e-14
04210 Apoptosis [PATH:ko04210]	36682.5	-0.0783173	0.0337307	-2.32184	0.0202415	0.0302557	42138.2	-0.0956221	0.0386712	-2.4727	0.0134098	0.020402	38818	-0.0920463	0.0420208	-2.19049	0.0284884	0.0427326
04211 Longevity regulating pathway [PATH:ko04211]	65780.8	-0.105625	0.0293377	-3.60033	0.00031781	0.00060172	76551.4	-0.0843148	0.0345591	-2.43973	0.0146983	0.0222038	70136.5	-0.0967477	0.0364299	-2.65572	0.00791382	0.013067
04212 Longevity regulating pathway - worm [PATH:ko04212]	77461.8	0.114879	0.0308985	3.71797	0.000200832	0.000397928	90486.8	0.145257	0.0389634	3.72804	0.000192976	0.000380592	83536.5	0.154621	0.0372099	4.15537	3.25e-05	7.6e-05
04213 Longevity regulating pathway - multiple species [PATH:ko04213]	96426.1	0.128576	0.0266959	4.81632	1.46e-06	3.62e-06	112415	0.153236	0.0345413	4.43633	9.15e-06	2.08e-05	103380	0.152001	0.0345035	4.40539	1.06e-05	2.63e-05
04214 Apoptosis - fly [PATH:ko04214]	40622.8	0.041732	0.0339782	1.2282	0.219372	0.267007	46847.3	0.0361875	0.0385176	0.939506	0.347471	0.414629	43010.3	0.0300454	0.0407245	0.737773	0.460652	0.533255
04215 Apoptosis - multiple species [PATH:ko04215]	5021.14	0.0199389	0.0854312	0.233391	0.815458	0.837072	5842.37	0.0401264	0.08184	0.490303	0.623919	0.685025	5367.83	0.0363148	0.0927508	0.391531	0.695405	0.746203
04216 Ferroptosis [PATH:ko04216]	27402.1	0.0868922	0.0431295	2.01468	0.0439381	0.0626008	31919	0.109271	0.0431017	2.53519	0.0112386	0.0174096	29060.9	0.0801279	0.0472247	1.69674	0.0897465	0.120987
04217 Necroptosis [PATH:ko04217]	69495.1	0.0529683	0.029113	1.8194	0.0688503	0.0934084	80861.5	0.0728198	0.0353066	2.0625	0.0391602	0.0539879	74327.7	0.0702245	0.0361088	1.9448	0.0517986	0.0740477
04218 Cellular senescence [PATH:ko04218]	90530.2	-0.0421922	0.0268888	-1.56914	0.116616	0.149633	104897	-0.0339782	0.0327726	-1.03679	0.299835	0.36704	96321.7	-0.0397059	0.033486	-1.18575	0.235723	0.29362
04260 Cardiac muscle contraction [PATH:ko04260]	39224.2	0.755842	0.036347	20.7952	4.79e-96	2.04e-93	46808.7	0.82958	0.054053	15.3475	3.68e-53	1.96e-51	43459.6	0.850156	0.0493935	17.2119	2.16e-66	3.07e-64
04261 Adrenergic signaling in cardiomyocytes [PATH:ko04261]	51954.5	0.150089	0.0317175	4.73207	2.22e-06	5.44e-06	60511.8	0.171961	0.0378711	4.5407	5.61e-06	1.31e-05	55664.9	0.171555	0.0388871	4.41161	1.03e-05	2.57e-05
04270 Vascular smooth muscle contraction [PATH:ko04270]	32511.8	0.154969	0.0363804	4.25969	2.05e-05	4.59e-05	37878.3	0.177521	0.0401073	4.42616	9.59e-06	2.17e-05	34670.1	0.16351	0.0436144	3.74899	0.000177545	0.000378171
04310 Wnt signaling pathway [PATH:ko04310]	45279	0.148434	0.0366067	4.05482	5.02e-05	0.000110175	52562.8	0.161104	0.0386317	4.17026	3.04e-05	6.55e-05	47981.1	0.13956	0.0406888	3.42993	0.000603738	0.00118522
04320 Dorso-ventral axis formation [PATH:ko04320]	15704.3	0.0302913	0.0449487	0.673907	0.500371	0.558005	18097.4	0.0226439	0.0486811	0.465147	0.641826	0.702874	16615	0.016429	0.0540766	0.30381	0.761272	0.810755
04330 Notch signaling pathway [PATH:ko04330]	17856	0.667425	0.0459744	14.5173	9.41e-48	2.86e-46	20857.4	0.693301	0.0517319	13.4018	5.9e-41	1.8e-39	19380.6	0.716332	0.0519716	13.7832	3.22e-43	1.25e-41
04340 Hedgehog signaling pathway [PATH:ko04340]	19585.7	0.205445	0.0441615	4.65213	3.29e-06	8e-06	22708.9	0.214725	0.0466914	4.59881	4.25e-06	1e-05	20833.2	0.206972	0.0511711	4.04471	5.24e-05	0.000120632
04341 Hedgehog signaling pathway - fly [PATH:ko04341]	21543.2	0.147254	0.0402861	3.65521	0.000256973	0.000490899	25026.2	0.161956	0.0439397	3.68587	0.000227924	0.000443359	22938.1	0.15161	0.0483583	3.13514	0.00171771	0.00312711
04350 TGF-beta signaling pathway [PATH:ko04350]	18299.9	0.0819401	0.043954	1.86422	0.0622902	0.0858397	21262.9	0.0973992	0.0462232	2.10715	0.0351044	0.0488708	19428.7	0.078216	0.0514018	1.52166	0.128095	0.168421
04360 Axon guidance [PATH:ko04360]	33606.6	0.0583239	0.0374194	1.55865	0.119078	0.152335	39173	0.0829025	0.0391945	2.11516	0.0344167	0.0480705	35720.1	0.0578334	0.0432194	1.33813	0.180853	0.230669
04361 Axon regeneration [PATH:ko04361]	65634.3	-0.271985	0.0325702	-8.35074	6.78e-17	3.85e-16	75597.1	-0.281936	0.0355319	-7.93473	2.11e-15	1.1e-14	69772.1	-0.272035	0.0373152	-7.2902	3.09e-13	1.53e-12
04370 VEGF signaling pathway [PATH:ko04370]	28319.9	-0.134	0.0412095	-3.25169	0.0011472	0.0020708	32924.2	-0.115399	0.0428397	-2.69374	0.00706559	0.0114446	30150.7	-0.129398	0.0465208	-2.78151	0.00541069	0.00918309
04371 Apelin signaling pathway [PATH:ko04371]	49601.2	0.0807144	0.0324015	2.49107	0.0127361	0.0195869	57832.2	0.105929	0.0361968	2.92647	0.00342837	0.00574994	52859.6	0.0876527	0.0391805	2.23715	0.0252765	0.0384342
04380 Osteoclast differentiation [PATH:ko04380]	19027.5	-0.293849	0.0434882	-6.75698	1.41e-11	5.41e-11	22024.2	-0.288373	0.0459792	-6.27182	3.57e-10	1.15e-09	20129.9	-0.309585	0.0503016	-6.15457	7.53e-10	2.76e-09
04390 Hippo signaling pathway [PATH:ko04390]	32700.3	-0.0135764	0.0364147	-0.372826	0.709278	0.74057	37987.8	0.00192806	0.0398297	0.0484076	0.961391	0.970916	34774.5	-0.012619	0.0430462	-0.29315	0.769408	0.817376
04391 Hippo signaling pathway - fly [PATH:ko04391]	22302.2	-0.00558495	0.0405285	-0.137803	0.890396	0.898836	25946.9	0.014148	0.0434881	0.325329	0.744932	0.797339	23733.7	-0.00253096	0.0481826	-0.0525285	0.958108	0.964903
04392 Hippo signaling pathway - multiple species [PATH:ko04392]	24202.7	0.125294	0.0423994	2.95508	0.00312592	0.0051614	28080.3	0.136553	0.0445285	3.06664	0.00216477	0.00376405	25715.9	0.123792	0.048348	2.56044	0.0104541	0.0169332
04510 Focal adhesion [PATH:ko04510]	43986.1	0.108833	0.0361581	3.00993	0.00261312	0.00441742	51141	0.125965	0.0383551	3.28417	0.00102283	0.0018385	46703	0.105364	0.0408912	2.57668	0.00997543	0.0162196
04512 ECM-receptor interaction [PATH:ko04512]	596.878	1.3272	0.250533	5.2975	1.17e-07	3.19e-07	641.401	1.1787	0.237863	4.95538	7.22e-07	1.78e-06	613.832	1.25841	0.275206	4.57259	4.82e-06	1.24e-05
04514 Cell adhesion molecules [PATH:ko04514]	17.71	7.54569	1.94371	3.8821	0.000103557	0.000215196	20.002	7.51185	1.89394	3.96625	7.3e-05	0.000150984	17.178	7.41265	2.09585	3.53683	0.000404963	0.000833401
04515 Cell adhesion molecules [BR:ko04515]	15974.8	0.517126	0.292266	1.76937	0.0768325	0.102927	18204.8	0.482629	0.30646	1.57485	0.11529	0.150656	16158.4	0.392613	0.284384	1.38057	0.16741	0.21481
04520 Adherens junction [PATH:ko04520]	21008.8	0.175943	0.0511424	3.44025	0.000581174	0.00107643	24605.9	0.212372	0.0480789	4.41716	1e-05	2.25e-05	22318.1	0.174004	0.0543359	3.20239	0.00136294	0.0025244
04530 Tight junction [PATH:ko04530]	68704.2	0.171855	0.0317034	5.42071	5.94e-08	1.65e-07	80463.7	0.208388	0.0369638	5.63762	1.72e-08	4.74e-08	73635	0.194012	0.0393643	4.92864	8.28e-07	2.29e-06
04540 Gap junction [PATH:ko04540]	42315.5	-0.0217336	0.0348275	-0.624035	0.532604	0.589323	49077.8	-0.0109631	0.0376199	-0.291418	0.770731	0.816745	44792.6	-0.0342769	0.03966	-0.86427	0.38744	0.462323
04550 Signaling pathways regulating pluripotency of stem cells [PATH:ko04550]	15475	-0.201383	0.046006	-4.37732	1.2e-05	2.81e-05	17953.5	-0.188611	0.0492722	-3.82794	0.00012922	0.000259659	16519.2	-0.188409	0.0544092	-3.46282	0.00053454	0.00106815
04610 Complement and coagulation cascades [PATH:ko04610]	321.724	2.31262	0.324599	7.12454	1.04e-12	4.4e-12	375.466	2.32745	0.303493	7.66887	1.74e-14	8.03e-14	298.025	2.06932	0.35614	5.81041	6.23e-09	2.12e-08
04611 Platelet activation [PATH:ko04611]	26503.4	-0.11302	0.0455112	-2.48335	0.0130154	0.019873	31005	-0.0762367	0.044905	-1.69773	0.0895584	0.117753	28248.2	-0.105219	0.0503437	-2.09001	0.0366167	0.0536038
04612 Antigen processing and presentation [PATH:ko04612]	47632.5	0.729216	0.0354725	20.5572	6.63e-94	1.41e-91	55979.7	0.76854	0.0457896	16.7842	3.19e-63	3.39e-61	52036.8	0.792083	0.041185	19.2323	1.99e-82	8.46e-80
04613 Neutrophil extracellular trap formation [PATH:ko04613]	65679.4	0.233225	0.0319765	7.29364	3.02e-13	1.32e-12	76982	0.271117	0.0358986	7.5523	4.28e-14	1.94e-13	70262.3	0.250014	0.0393775	6.34915	2.17e-10	8.46e-10
04614 Renin-angiotensin system [PATH:ko04614]	14890.1	0.51387	0.0520444	9.8737	5.41e-23	5.49e-22	17624.3	0.573043	0.0622335	9.20796	3.32e-20	2.95e-19	16392.4	0.599304	0.0604127	9.92017	3.4e-23	4.67e-22
04620 Toll-like receptor signaling pathway [PATH:ko04620]	8628.95	-0.0909967	0.0703503	-1.29348	0.195845	0.243236	10076	-0.0602683	0.0645607	-0.933513	0.350555	0.415979	9109.28	-0.112072	0.073396	-1.52694	0.126775	0.167202
04621 NOD-like receptor signaling pathway [PATH:ko04621]	52224.4	-0.005995	0.0317891	-0.188587	0.850417	0.862566	60396	-0.00351742	0.0363201	-0.0968451	0.922849	0.938267	55336.4	-0.0155913	0.0378279	-0.412164	0.680219	0.733603
04622 RIG-I-like receptor signaling pathway [PATH:ko04622]	23402.8	0.0482001	0.0417647	1.15409	0.248465	0.301555	27317.7	0.0768431	0.0432879	1.77516	0.0758712	0.100689	24915.5	0.0523991	0.0486193	1.07774	0.281149	0.346155
04623 Cytosolic DNA-sensing pathway [PATH:ko04623]	29150.2	0.333967	0.0362348	9.21674	3.06e-20	2.25e-19	34594.3	0.402541	0.0484727	8.3045	1e-16	6.47e-16	31731.1	0.394964	0.051765	7.62995	2.35e-14	1.33e-13
04624 Toll and Imd signaling pathway [PATH:ko04624]	16118.8	-0.319158	0.0514083	-6.20829	5.36e-10	1.84e-09	18740.2	-0.299589	0.0496205	-6.03759	1.56e-09	4.9e-09	17018.9	-0.341551	0.0547436	-6.23911	4.4e-10	1.66e-09
04625 C-type lectin receptor signaling pathway [PATH:ko04625]	31263.7	-0.219109	0.0418511	-5.23543	1.65e-07	4.38e-07	36264.1	-0.206925	0.0430641	-4.80506	1.55e-06	3.74e-06	33271.6	-0.215613	0.0460767	-4.67943	2.88e-06	7.56e-06
04626 Plant-pathogen interaction [PATH:ko04626]	28763	0.520876	0.0457558	11.3838	5.03e-30	7.66e-29	33960.4	0.573765	0.053098	10.8058	3.23e-27	5.1e-26	31436.3	0.588522	0.0520204	11.3133	1.13e-29	2.18e-28
04630 JAK-STAT signaling pathway [PATH:ko04630]	19813.8	-0.0180196	0.0428276	-0.420747	0.67394	0.715956	22846.5	-0.0242386	0.0464644	-0.52166	0.601907	0.664281	20916.4	-0.038704	0.0503746	-0.768323	0.442295	0.514803
04640 Hematopoietic cell lineage [PATH:ko04640]	1835.42	-0.606337	0.121808	-4.97781	6.43e-07	1.62e-06	2087.62	-0.664359	0.121832	-5.45309	4.95e-08	1.3e-07	1930.88	-0.645635	0.143333	-4.50443	6.66e-06	1.68e-05
04650 Natural killer cell mediated cytotoxicity [PATH:ko04650]	30176.8	0.0120716	0.036844	0.32764	0.743184	0.772186	34853.8	0.0108708	0.0407315	0.26689	0.789554	0.828448	31926.7	-0.00181608	0.0435465	-0.0417045	0.966734	0.971294
04657 IL-17 signaling pathway [PATH:ko04657]	31704.7	0.263016	0.0356312	7.38163	1.56e-13	6.94e-13	37212.7	0.304458	0.0439046	6.93453	4.08e-12	1.61e-11	34220.6	0.303284	0.0458736	6.61129	3.81e-11	1.53e-10
04658 Th1 and Th2 cell differentiation [PATH:ko04658]	14301.8	-0.184538	0.0501294	-3.68123	0.000232116	0.000453584	16512.5	-0.186841	0.0516801	-3.61534	0.000299957	0.000570454	15159.7	-0.193537	0.0573972	-3.37189	0.000746551	0.00142615
04659 Th17 cell differentiation [PATH:ko04659]	22674.5	-0.0764533	0.0396586	-1.92779	0.0538818	0.0752579	26226.4	-0.0734203	0.0432976	-1.69571	0.0899403	0.117891	24049.8	-0.0832525	0.0473134	-1.7596	0.0784763	0.107495
04660 T cell receptor signaling pathway [PATH:ko04660]	41760.6	-0.10575	0.0356671	-2.9649	0.00302779	0.00503843	48452.3	-0.0935369	0.0376931	-2.48154	0.0130816	0.0200459	44177	-0.120568	0.039719	-3.03551	0.00240128	0.00424458
04662 B cell receptor signaling pathway [PATH:ko04662]	24699.7	-0.0204495	0.0386499	-0.529097	0.596738	0.648228	28574.2	-0.0169037	0.0423295	-0.399337	0.689645	0.748143	26203.7	-0.0264411	0.0460669	-0.573973	0.565986	0.632731
04664 Fc epsilon RI signaling pathway [PATH:ko04664]	29525.8	-0.0581347	0.0363571	-1.59899	0.109822	0.141878	34210.8	-0.0499808	0.0402116	-1.24294	0.213888	0.27118	31343.8	-0.0623159	0.0434772	-1.4333	0.151772	0.197119
04666 Fc gamma R-mediated phagocytosis [PATH:ko04666]	54088.7	0.135839	0.0308833	4.39848	1.09e-05	2.58e-05	62786.6	0.148533	0.0355577	4.17725	2.95e-05	6.38e-05	57523.5	0.136946	0.0374208	3.65963	0.000252585	0.000530054
04668 TNF signaling pathway [PATH:ko04668]	15231.2	-0.0385974	0.0564941	-0.683212	0.494473	0.55433	17481.5	-0.0585771	0.0575117	-1.01852	0.308429	0.375402	15974.2	-0.078921	0.0613047	-1.28736	0.197971	0.251748
04670 Leukocyte transendothelial migration [PATH:ko04670]	21112.3	-0.22619	0.0442314	-5.11379	3.16e-07	8.15e-07	24659.6	-0.1927	0.0451746	-4.26568	1.99e-05	4.4e-05	22497.6	-0.218676	0.0511842	-4.27234	1.93e-05	4.68e-05
04672 Intestinal immune network for IgA production [PATH:ko04672]	0.978	1.33961	4.722	0.283695	0.776645	0.801091	1.172	1.40753	4.73476	0.297276	0.766256	0.816063	0.945951	1.13969	4.84747	0.23511	0.814124	0.850041
04710 Circadian rhythm [PATH:ko04710]	19893.5	-0.13412	0.0416843	-3.21752	0.00129304	0.00229514	23065.5	-0.123763	0.0449349	-2.75427	0.00588229	0.00967511	21133.1	-0.136323	0.0495741	-2.74988	0.00596162	0.0100382
04711 Circadian rhythm - fly [PATH:ko04711]	3391.11	0.14975	0.11168	1.34088	0.179959	0.224159	3969.05	0.18472	0.101534	1.81929	0.0688665	0.0922551	3600.59	0.146688	0.116336	1.2609	0.207345	0.262884
04712 Circadian rhythm - plant [PATH:ko04712]	7213.55	0.728595	0.0903881	8.06074	7.58e-16	4.04e-15	8510.7	0.776527	0.0821508	9.45246	3.31e-21	3.2e-20	7747.14	0.752174	0.0917278	8.20007	2.4e-16	1.82e-15
04713 Circadian entrainment [PATH:ko04713]	18350.8	0.313096	0.0458998	6.8213	9.02e-12	3.53e-11	21382.2	0.334711	0.0469201	7.13365	9.77e-13	3.97e-12	19489.5	0.310558	0.0524323	5.92303	3.16e-09	1.12e-08
04714 Thermogenesis [PATH:ko04714]	218691	0.327265	0.0261156	12.5314	5.03e-36	1.02e-34	258350	0.384339	0.0395728	9.7122	2.68e-22	2.85e-21	237575	0.383058	0.0383741	9.98222	1.82e-23	2.68e-22
04720 Long-term potentiation [PATH:ko04720]	30322.3	0.0598217	0.0362785	1.64896	0.0991561	0.129176	35363.6	0.0860109	0.0403463	2.13181	0.0330222	0.0464272	32366.1	0.0714015	0.044299	1.61181	0.107004	0.141564
04721 Synaptic vesicle cycle [PATH:ko04721]	63431.9	0.124937	0.0306445	4.07698	4.56e-05	0.000100704	74462.1	0.168439	0.0366976	4.58991	4.43e-06	1.04e-05	68070.1	0.150978	0.0401194	3.7632	0.000167751	0.00036275
04722 Neurotrophin signaling pathway [PATH:ko04722]	51861.8	-0.0547455	0.0331474	-1.65158	0.0986206	0.128872	60489.6	-0.0272305	0.0364099	-0.747888	0.454528	0.519112	55298.9	-0.0458151	0.0394536	-1.16124	0.245545	0.304962
04723 Retrograde endocannabinoid signaling [PATH:ko04723]	101266	0.23488	0.0364705	6.44029	1.19e-10	4.3e-10	119369	0.287944	0.0446675	6.44639	1.15e-10	4e-10	110082	0.294069	0.0428497	6.86279	6.75e-12	3.06e-11
04724 Glutamatergic synapse [PATH:ko04724]	42406.8	-0.132324	0.0326735	-4.04989	5.12e-05	0.000111944	48959.4	-0.13485	0.0376077	-3.58571	0.000336164	0.000630863	44853.2	-0.147844	0.039373	-3.75497	0.000173361	0.00037299
04725 Cholinergic synapse [PATH:ko04725]	36789.3	-0.151451	0.0350737	-4.31808	1.57e-05	3.59e-05	42168.2	-0.175918	0.0387974	-4.53428	5.78e-06	1.34e-05	38954.6	-0.163708	0.0430634	-3.80156	0.000143787	0.000314119
04726 Serotonergic synapse [PATH:ko04726]	33080.8	-0.188952	0.0378453	-4.99274	5.95e-07	1.52e-06	37954.1	-0.210742	0.0410886	-5.12897	2.91e-07	7.3e-07	34987.2	-0.204932	0.0449337	-4.56075	5.1e-06	1.31e-05
04727 GABAergic synapse [PATH:ko04727]	42200.9	-0.0767225	0.0351611	-2.18203	0.0291074	0.0426108	49091.4	-0.0569105	0.0374234	-1.52072	0.128329	0.166672	44805.1	-0.0805607	0.0403937	-1.99439	0.0461098	0.0665857
04728 Dopaminergic synapse [PATH:ko04728]	63570.4	-0.0934071	0.0330329	-2.8277	0.00468835	0.00759405	73586.7	-0.0878403	0.0363981	-2.41332	0.015808	0.0237958	67686	-0.0886538	0.0375793	-2.35911	0.0183187	0.0289259
04730 Long-term depression [PATH:ko04730]	21012.7	-0.0446821	0.0417551	-1.0701	0.284574	0.342454	24333.7	-0.0382939	0.0445138	-0.860272	0.389639	0.453514	22229.5	-0.0591246	0.0485299	-1.21831	0.223105	0.281191
04740 Olfactory transduction [PATH:ko04740]	11450.1	0.386528	0.052277	7.39385	1.43e-13	6.46e-13	13383.4	0.41568	0.0539448	7.70565	1.3e-14	6.09e-14	12213.4	0.39523	0.061845	6.39065	1.65e-10	6.52e-10
04742 Taste transduction [PATH:ko04742]	4592.54	0.327555	0.0862634	3.79715	0.00014637	0.000295514	5427.5	0.38514	0.0801925	4.8027	1.57e-06	3.77e-06	4895.74	0.334791	0.0958416	3.49317	0.000477315	0.000968268
04744 Phototransduction [PATH:ko04744]	6287.94	0.382045	0.0709794	5.38247	7.35e-08	2.03e-07	7311.1	0.398264	0.0710487	5.60552	2.08e-08	5.63e-08	6734.36	0.401249	0.0803783	4.99201	5.98e-07	1.66e-06
04745 Phototransduction - fly [PATH:ko04745]	9081.35	0.177508	0.0567327	3.12884	0.00175496	0.00307659	10520.4	0.184722	0.0590297	3.1293	0.00175223	0.00307181	9678.85	0.184571	0.0668322	2.76171	0.00575003	0.00972029
04750 Inflammatory mediator regulation of TRP channels [PATH:ko04750]	27941.5	-0.0164887	0.0377165	-0.437176	0.661984	0.708556	32518	0.0042308	0.0410646	0.103028	0.917941	0.937752	29752.4	-0.0117253	0.0450667	-0.260177	0.794727	0.838005
04810 Regulation of actin cytoskeleton [PATH:ko04810]	75115.7	0.121552	0.0297182	4.09015	4.31e-05	9.57e-05	87145.8	0.132737	0.0342943	3.87052	0.000108603	0.000220308	79836.3	0.120926	0.0354488	3.41129	0.000646551	0.00125767
04812 Cytoskeleton proteins [BR:ko04812]	234510	0.229215	0.0249781	9.17662	4.45e-20	3.21e-19	272583	0.245137	0.0325079	7.54086	4.67e-14	2.09e-13	251344	0.250981	0.0307659	8.15779	3.41e-16	2.42e-15
04910 Insulin signaling pathway [PATH:ko04910]	107398	0.176332	0.0260616	6.76599	1.32e-11	5.13e-11	125185	0.200098	0.0334528	5.98149	2.21e-09	6.63e-09	114948	0.194758	0.0338765	5.74905	8.97e-09	3.03e-08
04911 Insulin secretion [PATH:ko04911]	12502.7	0.104595	0.0654281	1.59862	0.109905	0.141878	14529.4	0.120292	0.0615771	1.95352	0.050758	0.0689765	13241.1	0.0938879	0.067629	1.38828	0.165052	0.212423
04912 GnRH signaling pathway [PATH:ko04912]	51995.1	-0.059917	0.0340304	-1.76069	0.0782905	0.104224	60258.9	-0.0510375	0.0369853	-1.37994	0.167605	0.21571	55184	-0.0647197	0.0387682	-1.6694	0.0950379	0.127315
04913 Ovarian steroidogenesis [PATH:ko04913]	7640.89	0.116167	0.0658669	1.76366	0.0777892	0.103881	8898.38	0.137577	0.0645967	2.12978	0.0331897	0.0465092	8095.36	0.10662	0.073981	1.44118	0.149533	0.194805
04914 Progesterone-mediated oocyte maturation [PATH:ko04914]	68505.3	0.103239	0.0294952	3.5002	0.000464917	0.00086866	79752.5	0.124285	0.0363917	3.41521	0.000637326	0.00118044	73477.6	0.128108	0.0362781	3.53129	0.000413544	0.00084697
04915 Estrogen signaling pathway [PATH:ko04915]	54755.1	0.564465	0.0325864	17.3221	3.2e-67	2.27e-65	63987	0.591882	0.0405662	14.5905	3.23e-48	1.53e-46	59195.2	0.605057	0.0388212	15.5857	9.1e-55	5.54e-53
04916 Melanogenesis [PATH:ko04916]	27034.5	0.108345	0.0391703	2.766	0.0056749	0.00912267	31456.7	0.127731	0.0415586	3.07351	0.00211554	0.00369352	28748.7	0.109288	0.045662	2.39342	0.016692	0.0265327
04917 Prolactin signaling pathway [PATH:ko04917]	22887.7	-0.112975	0.0405358	-2.78703	0.00531927	0.00858337	26544.2	-0.101847	0.0434193	-2.34565	0.0189938	0.0281929	24313.8	-0.115096	0.0475965	-2.41817	0.0155989	0.0248881
04918 Thyroid hormone synthesis [PATH:ko04918]	33133.6	0.764198	0.0459917	16.616	5.34e-62	3.25e-60	39090.2	0.811777	0.0528647	15.3557	3.24e-53	1.96e-51	36287.3	0.832031	0.0504876	16.4799	5.12e-61	4.36e-59
04919 Thyroid hormone signaling pathway [PATH:ko04919]	83281.4	0.129325	0.0300381	4.30536	1.67e-05	3.78e-05	96947.4	0.149841	0.0354544	4.22631	2.38e-05	5.16e-05	89030.2	0.144744	0.0361703	4.00172	6.29e-05	0.00014249
04920 Adipocytokine signaling pathway [PATH:ko04920]	25906.6	0.0114595	0.0533474	0.214809	0.829917	0.847293	30361.2	0.051717	0.0490328	1.05474	0.291543	0.358952	27543.3	0.0117313	0.0546448	0.214682	0.830015	0.858125
04921 Oxytocin signaling pathway [PATH:ko04921]	67270.7	0.0570021	0.0290497	1.96223	0.049736	0.0701573	78792.6	0.095285	0.0371416	2.56545	0.0103042	0.0160791	72270	0.0867441	0.0387944	2.23599	0.0253521	0.0384342
04922 Glucagon signaling pathway [PATH:ko04922]	70205.8	0.313595	0.0286708	10.9378	7.6e-28	1.01e-26	82098.7	0.344821	0.0373522	9.23162	2.67e-20	2.42e-19	75568.2	0.345998	0.0372417	9.2906	1.53e-20	1.68e-19
04923 Regulation of lipolysis in adipocytes [PATH:ko04923]	10999.1	-0.0292867	0.0601838	-0.486621	0.626527	0.677412	12895.8	0.0125413	0.055447	0.226186	0.821057	0.85728	11663.3	-0.0366756	0.065182	-0.562665	0.573663	0.638069
04924 Renin secretion [PATH:ko04924]	19329.9	0.0857487	0.0460395	1.8625	0.0625322	0.0858397	22493.8	0.105532	0.0468659	2.25178	0.024336	0.0352623	20550.7	0.0860651	0.0520084	1.65483	0.0979586	0.130407
04925 Aldosterone synthesis and secretion [PATH:ko04925]	35170.1	0.150072	0.0383714	3.91103	9.19e-05	0.00019478	40753.8	0.158081	0.0418044	3.78144	0.000155925	0.000311849	37705	0.173219	0.0427487	4.05202	5.08e-05	0.00011756
04926 Relaxin signaling pathway [PATH:ko04926]	32058.1	-0.0153433	0.037839	-0.405488	0.685119	0.72422	37215	-0.00194157	0.0405379	-0.0478951	0.9618	0.970916	34036.4	-0.0191264	0.0436752	-0.437923	0.661442	0.715163
04927 Cortisol synthesis and secretion [PATH:ko04927]	6182.24	-0.195726	0.0771851	-2.53581	0.0112189	0.0175064	7269.09	-0.142735	0.0704144	-2.02707	0.0426552	0.058428	6566.69	-0.198272	0.0840558	-2.35882	0.0183333	0.0289259
04928 Parathyroid hormone synthesis, secretion and action [PATH:ko04928]	27416.3	-0.00059527	0.0406786	-0.0146335	0.988325	0.988325	31836	0.0135235	0.0423309	0.31947	0.74937	0.800079	29054.5	-0.00973286	0.045863	-0.212216	0.831939	0.858125
04929 GnRH secretion [PATH:ko04929]	9548.09	-0.1667	0.0560358	-2.97488	0.00293102	0.00489653	11061.8	-0.158727	0.0579122	-2.74082	0.00612861	0.0100415	10125.5	-0.174319	0.0656742	-2.6543	0.00794735	0.0130717
04935 Growth hormone synthesis, secretion and action [PATH:ko04935]	35707.4	-0.0239033	0.0367036	-0.651251	0.514884	0.5712	41504.2	-0.00678769	0.0391551	-0.173354	0.862373	0.896027	37909.7	-0.0277785	0.0422696	-0.657174	0.511069	0.583687
04960 Aldosterone-regulated sodium reabsorption [PATH:ko04960]	16384.9	0.155425	0.0491458	3.16253	0.00156406	0.00275327	18982.3	0.162626	0.0505344	3.21811	0.00129037	0.00229041	17419.8	0.155568	0.0555839	2.79879	0.00512943	0.00877565
04961 Endocrine and other factor-regulated calcium reabsorption [PATH:ko04961]	37584.7	0.539266	0.041719	12.9262	3.2e-38	7.58e-37	44097.2	0.576492	0.0482694	11.9432	7.04e-33	1.77e-31	40885.4	0.595079	0.0462209	12.8747	6.25e-38	1.66e-36
04962 Vasopressin-regulated water reabsorption [PATH:ko04962]	40114.2	0.293749	0.0330716	8.88222	6.55e-19	4.3e-18	46944.6	0.327167	0.0416965	7.84641	4.28e-15	2.12e-14	43281.6	0.332638	0.0419323	7.93274	2.14e-15	1.36e-14
04964 Proximal tubule bicarbonate reclamation [PATH:ko04964]	6339.52	0.170575	0.0835379	2.04189	0.0411625	0.0590412	7357.45	0.182356	0.078287	2.32932	0.019842	0.029248	6712.99	0.159658	0.0877352	1.81977	0.0687942	0.0957723
04966 Collecting duct acid secretion [PATH:ko04966]	24339.1	-0.0696009	0.0433285	-1.60635	0.108196	0.140523	28589.4	-0.0215055	0.0426496	-0.504237	0.614095	0.67598	25980.1	-0.0574284	0.05049	-1.13742	0.255362	0.315316
04970 Salivary secretion [PATH:ko04970]	31396.6	0.26982	0.0405089	6.66076	2.72e-11	1.04e-10	36112.8	0.258104	0.0408624	6.31641	2.68e-10	8.8e-10	33609	0.288135	0.0432089	6.66842	2.59e-11	1.08e-10
04971 Gastric acid secretion [PATH:ko04971]	18087.7	0.292187	0.0461161	6.3359	2.36e-10	8.31e-10	21017.1	0.306786	0.0480573	6.38376	1.73e-10	5.83e-10	19244.7	0.294347	0.0530087	5.5528	2.81e-08	9e-08
04972 Pancreatic secretion [PATH:ko04972]	33587	0.16846	0.0419971	4.01123	6.04e-05	0.000130619	38654.4	0.157745	0.0425737	3.70522	0.000211207	0.000412726	35823.4	0.177397	0.045306	3.91553	9.02e-05	0.000202248
04973 Carbohydrate digestion and absorption [PATH:ko04973]	31996.1	-0.204714	0.0411616	-4.97341	6.58e-07	1.65e-06	36474.8	-0.246699	0.0420013	-5.8736	4.26e-09	1.24e-08	33808.8	-0.223684	0.0485675	-4.60563	4.11e-06	1.07e-05
04974 Protein digestion and absorption [PATH:ko04974]	22580.3	0.31535	0.0580296	5.43429	5.5e-08	1.54e-07	26438.1	0.34943	0.0533765	6.54651	5.89e-11	2.14e-10	23991.3	0.313872	0.0584717	5.36792	7.96e-08	2.46e-07
04975 Fat digestion and absorption [PATH:ko04975]	22233.8	0.0409601	0.0410506	0.997796	0.318378	0.378852	25471	0.0166474	0.0440353	0.378047	0.705396	0.760756	23533.8	0.0284895	0.0495819	0.574596	0.565565	0.632731
04976 Bile secretion [PATH:ko04976]	50844	-0.168836	0.0328138	-5.14527	2.67e-07	6.94e-07	58163.1	-0.199597	0.0371764	-5.36892	7.92e-08	2.05e-07	53733	-0.187122	0.0412468	-4.53665	5.72e-06	1.45e-05
04977 Vitamin digestion and absorption [PATH:ko04977]	38323.4	-0.110877	0.0568434	-1.95058	0.0511073	0.0718539	44367	-0.105137	0.0534562	-1.9668	0.0492067	0.0671861	40831.7	-0.104283	0.0553825	-1.88297	0.059705	0.0839416
04978 Mineral absorption [PATH:ko04978]	27776.4	0.0350784	0.044289	0.792034	0.428341	0.489204	32127.4	0.0384502	0.0455557	0.844027	0.398655	0.460235	29966.9	0.0770659	0.0440126	1.751	0.0799466	0.109158
04979 Cholesterol metabolism [PATH:ko04979]	15640.3	-0.14823	0.0468235	-3.16571	0.00154706	0.00273463	18315.3	-0.107874	0.0491017	-2.19694	0.0280245	0.039928	16723.6	-0.130436	0.0564414	-2.31101	0.0208324	0.0327477
04990 Domain-containing proteins not elsewhere classified [BR:ko04990]	76374.6	0.0262578	0.0285896	0.918439	0.358389	0.4198	88308.1	0.0282228	0.0337443	0.836371	0.402946	0.463932	80910.6	0.0162835	0.0345271	0.471615	0.637202	0.695876
05111 Biofilm formation - Vibrio cholerae [PATH:ko05111]	2945.84	-0.985689	0.105756	-9.32041	1.16e-20	8.98e-20	3411.71	-0.976632	0.100504	-9.71736	2.54e-22	2.78e-21	3099.57	-1.03085	0.114859	-8.97494	2.84e-19	2.95e-18
09113 Global maps only	1120.31	-0.0868127	0.2089	-0.415571	0.677724	0.718185	1357.58	0.0507324	0.17875	0.283817	0.776551	0.818838	1202.65	-0.0576789	0.212315	-0.271666	0.785879	0.832628
99973 Transcription	8120.37	-0.103993	0.0597851	-1.73945	0.0819554	0.108763	9359.15	-0.111363	0.0616579	-1.80614	0.0708968	0.0946773	8633.42	-0.103743	0.0703147	-1.47541	0.140101	0.183077
99974 Translation	2540.11	-0.765173	0.130256	-5.87438	4.24e-09	1.38e-08	2974.99	-0.713306	0.116634	-6.11577	9.61e-10	3.05e-09	2698.81	-0.76684	0.134727	-5.6918	1.26e-08	4.18e-08
99975 Protein processing	4905.78	-0.671639	0.115216	-5.82938	5.56e-09	1.8e-08	5604.87	-0.713991	0.10347	-6.90045	5.18e-12	2.03e-11	5155.65	-0.71516	0.114122	-6.26663	3.69e-10	1.4e-09
99976 Replication and repair	6288.66	-0.272048	0.0706253	-3.85199	0.000117162	0.000239957	7262.59	-0.273372	0.0703019	-3.88854	0.000100851	0.000206551	6694.75	-0.267396	0.0801144	-3.33767	0.000844833	0.00160669
99977 Transport	18257.6	-0.303541	0.0554299	-5.47612	4.35e-08	1.23e-07	21653.7	-0.220769	0.051847	-4.25808	2.06e-05	4.53e-05	19625	-0.267723	0.0637777	-4.19774	2.7e-05	6.42e-05
99978 Cell growth	6877.36	0.0929758	0.0722145	1.28749	0.197922	0.245101	7837.89	0.0533308	0.0789236	0.675728	0.499214	0.561121	7059.55	-0.00770005	0.0794599	-0.0969049	0.922802	0.935985
99979 Unclassified viral proteins	1.809	-1.42973	3.19791	-0.447081	0.654816	0.702649	1.946	-1.85011	3.47323	-0.532676	0.594258	0.659255	1.87618	-1.57451	3.92607	-0.401039	0.688391	0.740542
99980 Enzymes with EC numbers	808363	-0.242866	0.0276975	-8.7685	1.81e-18	1.17e-17	929539	-0.257993	0.0295791	-8.72216	2.73e-18	2e-17	861599	-0.234621	0.0297535	-7.88548	3.13e-15	1.96e-14
99981 Carbohydrate metabolism	4941.7	0.403125	0.0782429	5.15222	2.57e-07	6.73e-07	5725.34	0.409719	0.0773658	5.29587	1.18e-07	3.02e-07	5212.11	0.382995	0.0887634	4.31479	1.6e-05	3.93e-05
99982 Energy metabolism	13090.1	0.777681	0.0664684	11.7	1.27e-31	2.26e-30	15346.5	0.811375	0.0679363	11.9432	7.05e-33	1.77e-31	14471.1	0.866617	0.0630699	13.7406	5.8e-43	2.06e-41
99983 Lipid metabolism	12454.1	-0.45606	0.0552521	-8.25415	1.53e-16	8.58e-16	14225	-0.495625	0.0556651	-8.90369	5.4e-19	4.34e-18	13155.8	-0.478087	0.0641405	-7.45374	9.07e-14	4.77e-13
99984 Nucleotide metabolism	80.316	2.596	0.598489	4.33759	1.44e-05	3.34e-05	92.259	2.58413	0.587615	4.39767	1.09e-05	2.45e-05	76.5982	2.409	0.70618	3.41132	0.000646497	0.00125767
99985 Amino acid metabolism	4586.94	-0.861691	0.0986366	-8.73602	2.41e-18	1.54e-17	5415.1	-0.776586	0.0846787	-9.17097	4.69e-20	4.08e-19	4885.22	-0.853604	0.103305	-8.26297	1.42e-16	1.12e-15
99986 Glycan metabolism	120.667	1.03033	0.532968	1.9332	0.0532116	0.0745662	125.302	0.793061	0.525423	1.50938	0.131203	0.169886	118.516	0.853024	0.602449	1.41593	0.156797	0.20241
99987 Cofactor metabolism	6999.94	-0.840132	0.0934641	-8.98882	2.5e-19	1.72e-18	8416.4	-0.685288	0.0839328	-8.16473	3.22e-16	1.91e-15	7598.92	-0.75632	0.104912	-7.20911	5.63e-13	2.76e-12
99988 Secondary metabolism	49184.9	-0.739652	0.0455383	-16.2424	2.53e-59	1.35e-57	55849.7	-0.807406	0.0369806	-21.8332	1.12e-105	4.78e-103	52150.5	-0.749869	0.0489271	-15.3262	5.11e-53	2.72e-51
99992 Structural proteins	2918.46	0.585071	0.131044	4.46469	8.02e-06	1.92e-05	3421.22	0.619316	0.116468	5.31749	1.05e-07	2.7e-07	3080.62	0.567778	0.132085	4.29857	1.72e-05	4.18e-05
99993 Cell motility	68.222	-0.642248	0.602857	-1.06534	0.286722	0.343099	79.32	-0.621783	0.591803	-1.05066	0.293415	0.360216	70.7693	-0.735733	0.707719	-1.03958	0.298534	0.364399
99994 Others	8276.89	-0.212288	0.0750366	-2.82913	0.00466742	0.00758901	9317.87	-0.294124	0.0674819	-4.35856	1.31e-05	2.92e-05	8730.81	-0.236849	0.0828692	-2.85811	0.00426177	0.00741026
99995 Signaling proteins	15514.8	0.0826398	0.0458351	1.80298	0.0713913	0.0965483	18013.6	0.0962671	0.0492966	1.95281	0.0508418	0.0689765	16563.3	0.0945575	0.0544769	1.73574	0.0826106	0.112435
99996 General function prediction only	20356.4	-0.336751	0.0592068	-5.68771	1.29e-08	3.84e-08	23594.9	-0.326249	0.0558264	-5.84399	5.1e-09	1.47e-08	21718.4	-0.324799	0.0595914	-5.45044	5.02e-08	1.59e-07
99997 Function unknown	73526.9	-0.263081	0.0368127	-7.14649	8.9e-13	3.83e-12	84309.7	-0.287319	0.0387396	-7.41667	1.2e-13	5.17e-13	77732	-0.280757	0.0409518	-6.8558	7.09e-12	3.18e-11
99998 Others	35.698	1.63596	0.878818	1.86155	0.062667	0.0858397	33.127	1.20061	0.937393	1.2808	0.200265	0.254666	35.2012	1.48633	1.04059	1.42835	0.153191	0.198357
99999 Others	4838	-0.16706	0.0819487	-2.03859	0.0414909	0.0593124	5639.34	-0.141103	0.0771704	-1.82846	0.0674813	0.0906846	5088.88	-0.200038	0.089051	-2.24633	0.0246828	0.0376878

## Sheet: functional_enriched_RS
DEseq2 analysis of the 3 resin soils replicas (in combinations of two) vs the 2 forest soil replicas - significantly enriched in Resin Soil
C1: combination RS.I and RS.II
C2: combination RS.I and RS.III
C3: combination RS.II and RS.III
Functional_Category	C1 baseMean	C1 log2FoldChange	C1 lfcSE	C1 stat	C1 pvalue	C1 padj	C2 baseMean	C2 log2FoldChange	C2 lfcSE	C2 stat	C2 pvalue	C2 padj	C3 baseMean	C3 log2FoldChange	C3 lfcSE	C3 stat	C3 pvalue	C3 padj
04514 Cell adhesion molecules [PATH:ko04514]	17.7102	7.54569	1.94371	3.8821	0.000103557	0.000215196	20.0018	7.51185	1.89394	3.96625	7.30108e-05	0.000150984	17.178	7.41265	2.09585	3.53683	0.000404963	0.000833401
01055 Biosynthesis of vancomycin group antibiotics [PATH:ko01055]	165.708	2.69228	0.432129	6.23027	4.65621e-10	1.62586e-09	252.224	3.14295	0.381093	8.2472	1.62149e-16	1.03098e-15	210.438	2.98583	0.480534	6.21358	5.17917e-10	1.93537e-09
99984 Nucleotide metabolism	80.3164	2.596	0.598489	4.33759	1.44051e-05	3.3351e-05	92.259	2.58413	0.587615	4.39767	1.0942e-05	2.45332e-05	76.5982	2.409	0.70618	3.41132	0.000646497	0.00125767
00642 Ethylbenzene degradation [PATH:ko00642]	187.083	2.53776	0.427056	5.94246	2.80781e-09	9.27229e-09	199.467	2.40109	0.415689	5.77616	7.6425e-09	2.1561e-08	193.082	2.48553	0.473521	5.24903	1.52899e-07	4.65251e-07
04610 Complement and coagulation cascades [PATH:ko04610]	321.724	2.31262	0.324599	7.12454	1.04432e-12	4.40478e-12	375.466	2.32745	0.303493	7.66887	1.73518e-14	8.03465e-14	298.025	2.06932	0.35614	5.81041	6.23216e-09	2.12392e-08
00601 Glycosphingolipid biosynthesis - lacto and neolacto series [PATH:ko00601]	51.6889	2.13646	0.717627	2.97712	0.00290969	0.00488002	58.8077	2.10705	0.714249	2.95002	0.00317758	0.00535039	50.0296	1.96595	0.857246	2.29333	0.0218288	0.0340626
03230 Viral genome structure [PATH:ko03230]	904.667	1.72669	0.204973	8.42399	3.63887e-17	2.12518e-16	1030.51	1.69955	0.192247	8.84044	9.53398e-19	7.3845e-18	932.164	1.66682	0.220265	7.56734	3.80945e-14	2.08054e-13
00534 Glycosaminoglycan biosynthesis - heparan sulfate / heparin [PATH:ko00534]	246.504	1.55586	0.361833	4.29993	1.7085e-05	3.85092e-05	292.42	1.60569	0.336146	4.77677	1.78134e-06	4.26321e-06	253.864	1.49299	0.399096	3.74093	0.000183338	0.000388568
04512 ECM-receptor interaction [PATH:ko04512]	596.878	1.3272	0.250533	5.2975	1.174e-07	3.18549e-07	641.401	1.1787	0.237863	4.95538	7.21887e-07	1.77759e-06	613.832	1.25841	0.275206	4.57259	4.81722e-06	1.24372e-05
00532 Glycosaminoglycan biosynthesis - chondroitin sulfate / dermatan sulfate [PATH:ko00532]	96.1256	1.31424	0.519529	2.52967	0.0114171	0.0177507	111.865	1.32672	0.508751	2.60781	0.00911239	0.0144846	95.5893	1.17645	0.613981	1.91611	0.0553515	0.078338
00535 Proteoglycans [BR:ko00535]	7145.48	1.28659	0.0717219	17.9386	5.89104e-72	5.01917e-70	8557.17	1.35956	0.083052	16.37	3.13097e-60	2.66759e-58	8068.37	1.40866	0.0786415	17.9124	9.4378e-72	2.01025e-69
00525 Acarbose and validamycin biosynthesis [PATH:ko00525]	219.541	1.0639	0.352022	3.02225	0.00250906	0.00427543	310.066	1.47378	0.325892	4.52228	6.11757e-06	1.40112e-05	268.086	1.35237	0.410324	3.29587	0.000981184	0.00185771
03200 Viral proteins [BR:ko03200]	1323.71	1.04891	0.183871	5.7046	1.16617e-08	3.57402e-08	1511.14	1.02237	0.169463	6.03302	1.60921e-09	4.96755e-09	1352.5	0.962292	0.190535	5.05048	4.41e-07	1.26e-06

## Sheet: functional_enriched_FS
DEseq2 analysis of the 3 resin soils replicas (in combinations of two) vs the 2 forest soil replicas - significantly enriched in Forest Soil
C1: combination RS.I and RS.II
C2: combination RS.I and RS.III
C3: combination RS.II and RS.III
Functional_Category	C1 baseMean	C1 log2FoldChange	C1 lfcSE	C1 stat	C1 pvalue	C1 padj	C2 baseMean	C2 log2FoldChange	C2 lfcSE	C2 stat	C2 pvalue	C2 padj	C3 baseMean	C3 log2FoldChange	C3 lfcSE	C3 stat	C3 pvalue	C3 padj
00471 D-Glutamine and D-glutamate metabolism [PATH:ko00471]	2227.38	-1.01125	0.108053	-9.35879	8.06524e-21	6.36258e-20	2561.96	-1.0315	0.108963	-9.46654	2.89256e-21	2.86565e-20	2351.39	-1.04251	0.127164	-8.19814	2.44136e-16	1.8246e-15
00473 D-Alanine metabolism [PATH:ko00473]	2030	-1.39435	0.124871	-11.1663	5.96167e-29	8.19248e-28	2332.07	-1.42432	0.119839	-11.8852	1.41219e-32	3.16628e-31	2151.09	-1.4115	0.139059	-10.1504	3.29999e-24	5.0207e-23
00512 Mucin type O-glycan biosynthesis [PATH:ko00512]	7.31225	-4.91987	2.32682	-2.11442	0.0344795	0.0497907	8.63722	-4.28742	1.99452	-2.1496	0.0315865	0.0447038	7.72794	-5.13547	2.53772	-2.02366	0.0430053	0.0625265
00902 Monoterpenoid biosynthesis [PATH:ko00902]	432.469	-1.38108	0.243306	-5.67633	1.37612e-08	4.07102e-08	504.897	-1.32751	0.238877	-5.55729	2.74001e-08	7.34116e-08	463.847	-1.33439	0.281804	-4.73518	2.18861e-06	5.86384e-06
00984 Steroid degradation [PATH:ko00984]	2032.4	-1.14081	0.11828	-9.64501	5.16062e-22	4.77919e-21	2334.57	-1.16824	0.116362	-10.0397	1.0198e-23	1.31647e-22	2151.88	-1.16026	0.135697	-8.55032	1.22752e-17	1.0349e-16
00997 Biosynthesis of various secondary metabolites - part 3 [PATH:ko00997]	910.351	-1.37937	0.176404	-7.81935	5.30986e-15	2.75854e-14	1052.82	-1.37726	0.170554	-8.0752	6.73647e-16	3.77597e-15	952.039	-1.46806	0.197874	-7.41919	1.17837e-13	5.97602e-13
01011 Peptidoglycan biosynthesis and degradation proteins [BR:ko01011]	9201.17	-1.15545	0.0586428	-19.7032	2.02315e-86	2.87287e-84	10598	-1.17017	0.0602527	-19.421	5.13205e-84	1.09313e-81	9745.25	-1.17307	0.0682652	-17.184	3.50065e-66	3.72819e-64
01059 Biosynthesis of enediyne antibiotics [PATH:ko01059]	8048.25	-1.23448	0.0819204	-15.0692	2.58114e-51	1.09956e-49	9151.65	-1.3128	0.0740915	-17.7187	3.00982e-70	4.27395e-68	8502.9	-1.26514	0.0874459	-14.4676	1.94042e-47	9.18466e-46
02060 Phosphotransferase system (PTS) [PATH:ko02060]	132.981	-1.90056	0.517502	-3.67255	0.000240138	0.000462891	148.626	-2.15095	0.502488	-4.2806	1.86386e-05	4.13545e-05	136.062	-2.19529	0.575152	-3.81688	0.00013515	0.00029831
