# Supplementary material for: Extremotolerant Fungi in Resinous Soils: A Unique Diversity of Generalist and Specialized Hydrocarbon Degraders
Source: Research Square preprint supplement (doi:10.21203/rs.3.rs-8530099/v1), 2026-02-10
Supplement: Supplementary file 6 [file 8cd8aae98a8a55754735b5b5.xlsx]

## Sheet: V.1.2
OTU_ID	genus	RS (%)	FS (%)	jrk_template	Phylum	Class	Order	Family	GENUS	COMMENT on genus	primary_lifestyle	Secondary_lifestyle	Comment_on_lifestyle_template	Endophytic_interaction_capability_template	Plant_pathogenic_capacity_template	Decay_substrate_template	Decay_type_template	Aquatic_habitat_template	Animal_biotrophic_capacity_template	Specific_hosts	Growth_form_template	Fruitbody_type_template	Hymenium_type_template	Ectomycorrhiza_exploration_type_template	Ectomycorrhiza_lineage_template	primary_photobiont	secondary_photobiont	COMMENT on genus	primary_lifestyle	Secondary_lifestyle	Comment_on_lifestyle_template	Endophytic_interaction_capability_template	Plant_pathogenic_capacity_template	Decay_substrate_template	Decay_type_template	Aquatic_habitat_template	Animal_biotrophic_capacity_template	Specific_hosts	Growth_form_template	Fruitbody_type_template	Hymenium_type_template	Ectomycorrhiza_exploration_type_template	Ectomycorrhiza_lineage_template	primary_photobiont	secondary_photobiont
OTU0001	Eurotiomycetes genus Incertae sedis	24.1311	0.00164818	jrk11009	Ascomycota	Dothideomycetes	Asterinales	Asterinaceae	Pycnocarpon		epiphyte	litter_saprotroph		foliar_endophyte		leaf/fruit/seed		non-aquatic			filamentous_mycelium	thyrothecium_(tiny_flattened_disc,_aperture_in_the_middle)	closed					#N/A	#N/A	#N/A	#N/A	#N/A	#N/A	#N/A	#N/A	#N/A	#N/A	#N/A	#N/A	#N/A	#N/A	#N/A	#N/A	#N/A	#N/A
OTU0002	Penicillium	0.00421283	30.7435	jrk11010	Ascomycota	Dothideomycetes	Asterinales	Neobueliellaceae	Neobueliella		lichen_parasite							non-aquatic			filamentous_mycelium	apothecium_(hymenium_on_surface)	smooth					0	unspecified_saprotroph	foliar_endophyte	toxin-producing,animal_parasite_some_species,mycoparasite_some_species	foliar_endophyte	0	soil	mold	partly_aquatic	opportunistic_human_parasite	0	filamentous_mycelium	0	0	0	0	0	0
OTU0003	Sporobolomyces	12.3166	0	jrk11028	Ascomycota	Dothideomycetes	Muyocopronales	Muyocopronaceae	Neocochlearomyces		plant_pathogen				leaf/fruit/seed_pathogen					Chromolaena	filamentous_mycelium							0	mycoparasite	0	litter_saprotroph_some_species	0	0	fungal_material	0	partly_aquatic	0	0	yeast	none	none	0	0	0	0
OTU0004	Sorocybe	7.06492	0		Ascomycota	Dothideomycetes	Pleosporales	Didymellaceae	Anthodidymella		wood_saprotroph					wood,leaf/fruit/seed		non-aquatic			filamentous_mycelium	perithecium_(hymenium_hidden,_narrow_opening)	closed					0	unspecified_saprotroph	resin_saprotroph	0	0	0	resins	0	non-aquatic	0	0	dimorphic_yeast	0	0	0	0	0	0
OTU0005	Fungi genus Incertae sedis	5.18094	0		Ascomycota	Dothideomycetes	Pleosporales	Lindgomycetaceae	Aquimassariosphaeria		wood_saprotroph					wood		freshwater			filamentous_mycelium	perithecium_(hymenium_hidden,_narrow_opening)	closed					#N/A	#N/A	#N/A	#N/A	#N/A	#N/A	#N/A	#N/A	#N/A	#N/A	#N/A	#N/A	#N/A	#N/A	#N/A	#N/A	#N/A	#N/A
OTU0006	Colacogloea	4.56587	0	jrk11044	Ascomycota	Dothideomycetes	Pleosporales	Lindgomycetaceae	Neolindgomyces		litter_saprotroph					leaf/fruit/seed					filamentous_mycelium							0	mycoparasite	fungal_decomposer	0	no_endophytic_capacity	0	fungal_material	0	non-aquatic	0	0	dimorphic_yeast	none	none	0	0	0	0
OTU0007	Candida	4.55576	0	jrk11061	Ascomycota	Dothideomycetes	Pleosporales	Longiostiolaceae	Crassiperidium		wood_saprotroph					wood		non-aquatic			filamentous_mycelium	perithecium_(hymenium_hidden,_narrow_opening)	closed					0	nectar/tap_saprotroph	0	0	0	0	sugar-rich_substrates	0	partly_aquatic	animal-associated/opportunistic_human_parasite	0	yeast	none	none	0	0	0	0
OTU0008	Penicillium	0.0235919	8.5112		Ascomycota	Dothideomycetes	Pleosporales	Morosphaeriaceae	Aquihelicascus		wood_saprotroph					wood		freshwater			filamentous_mycelium	perithecium_(hymenium_hidden,_narrow_opening)	closed					0	unspecified_saprotroph	foliar_endophyte	toxin-producing,animal_parasite_some_species,mycoparasite_some_species	foliar_endophyte	0	soil	mold	partly_aquatic	opportunistic_human_parasite	0	filamentous_mycelium	0	0	0	0	0	0
OTU0009	Phialocephala	0.727135	6.14936	jrk11049	Ascomycota	Dothideomycetes	Pleosporales	Parabambusicolaceae	Paratrimmatostroma		litter_saprotroph					leaf/fruit/seed					filamentous_mycelium							0	soil_saprotroph	root_endophyte	0	root_endophyte_dark_septate	root-associated	roots,soil	0	non-aquatic	0	0	filamentous_mycelium	apothecium_(hymenium_on_surface)	smooth	0	0	0	0
OTU0010	Penicillium	3.83621	0		Ascomycota	Dothideomycetes	Pleosporales	Phaeosphaeriaceae	Arezzomyces		wood_saprotroph					wood		non-aquatic			filamentous_mycelium	perithecium_(hymenium_hidden,_narrow_opening)	closed					0	unspecified_saprotroph	foliar_endophyte	toxin-producing,animal_parasite_some_species,mycoparasite_some_species	foliar_endophyte	0	soil	mold	partly_aquatic	opportunistic_human_parasite	0	filamentous_mycelium	0	0	0	0	0	0
OTU0011	Guomyces	3.80587	0.00164818		Ascomycota	Dothideomycetes	Pleosporales	Phaeosphaeriaceae	Dlhawksworthia		wood_saprotroph					leaf/fruit/seed		non-aquatic			filamentous_mycelium	perithecium_(hymenium_hidden,_narrow_opening)	closed					#N/A	#N/A	#N/A	#N/A	#N/A	#N/A	#N/A	#N/A	#N/A	#N/A	#N/A	#N/A	#N/A	#N/A	#N/A	#N/A	#N/A	#N/A
OTU0012	Penicillium	0.248557	6.80533	jrk11053	Ascomycota	Dothideomycetes	Pleosporales	Phaeosphaeriaceae	Hydeomyces		wood_saprotroph					wood					filamentous_mycelium							0	unspecified_saprotroph	foliar_endophyte	toxin-producing,animal_parasite_some_species,mycoparasite_some_species	foliar_endophyte	0	soil	mold	partly_aquatic	opportunistic_human_parasite	0	filamentous_mycelium	0	0	0	0	0	0
OTU0013	Debaryomyces	3.64073	0.0692235	jrk11057	Ascomycota	Dothideomycetes	Pleosporales	Phaeosphaeriaceae	Piniphoma		wood_saprotroph					wood					filamentous_mycelium							0	nectar/tap_saprotroph	0	0	0	0	sugar-rich_substrates	0	partly_aquatic	arthropod-associated	0	yeast	none	none	0	0	0	0
OTU0014	Sordariales genus Incertae sedis	0	6.1131	jrk11059	Ascomycota	Dothideomycetes	Pleosporales	Pleomonodictydaceae	Pleohelicoon		litter_saprotroph					leaf/fruit/seed		non-aquatic		Fagus	filamentous_mycelium							#N/A	#N/A	#N/A	#N/A	#N/A	#N/A	#N/A	#N/A	#N/A	#N/A	#N/A	#N/A	#N/A	#N/A	#N/A	#N/A	#N/A	#N/A
OTU0015	Symbiotaphrina	3.1057	0	jrk11060	Ascomycota	Dothideomycetes	Pleosporales	Pleosporaceae	Typhicola		litter_saprotroph					leaf/fruit/seed				Typha	filamentous_mycelium							0	animal_endosymbiont	litter_saprotroph	0	0	0	leaf/fruit/seed	0	non-aquatic	animal_endosymbiont	0	yeast	0	0	0	0	0	0
OTU0016	Penicillium	1.3995	2.22504	jrk11063	Ascomycota	Dothideomycetes	Pleosporales	Shiraiaceae	Rubroshiraia		plant_pathogen				leaf/fruit/seed_pathogen			non-aquatic		bamboo	filamentous_mycelium							0	unspecified_saprotroph	foliar_endophyte	toxin-producing,animal_parasite_some_species,mycoparasite_some_species	foliar_endophyte	0	soil	mold	partly_aquatic	opportunistic_human_parasite	0	filamentous_mycelium	0	0	0	0	0	0
OTU0017	Infundichalara	2.11063	0.0082409		Ascomycota	Dothideomycetes	Pleosporales	Sulcatisporaceae	Anthosulcatispora		wood_saprotroph					wood		non-aquatic			filamentous_mycelium	perithecium_(hymenium_hidden,_narrow_opening)	closed					0	litter_saprotroph	0	0	0	0	leaf/fruit/seed	0	non-aquatic	0	Pinus	filamentous_mycelium	0	0	0	0	0	0
OTU0018	Eurotiomycetes genus Incertae sedis	2.04912	0	jrk11067	Ascomycota	Dothideomycetes	Pleosporales	Thyridariaceae	Liua		wood_saprotroph					wood					filamentous_mycelium							#N/A	#N/A	#N/A	#N/A	#N/A	#N/A	#N/A	#N/A	#N/A	#N/A	#N/A	#N/A	#N/A	#N/A	#N/A	#N/A	#N/A	#N/A
OTU0019	Basidiomycota genus Incertae sedis	1.88061	0	jrk11069	Ascomycota	Dothideomycetes	Tubeufiales	Tubeufiaceae	Discotubeufia		litter_saprotroph					leaf/fruit/seed				Brownea	filamentous_mycelium							#N/A	#N/A	#N/A	#N/A	#N/A	#N/A	#N/A	#N/A	#N/A	#N/A	#N/A	#N/A	#N/A	#N/A	#N/A	#N/A	#N/A	#N/A
OTU0020		1.78961	0.00164818		Ascomycota	Dothideomycetes	Venturiales	Venturiaceae	Acantharia		litter_saprotroph					leaf/fruit/seed		non-aquatic			filamentous_mycelium							#N/A	#N/A	#N/A	#N/A	#N/A	#N/A	#N/A	#N/A	#N/A	#N/A	#N/A	#N/A	#N/A	#N/A	#N/A	#N/A	#N/A	#N/A
OTU0021	Exophiala	1.68682	0.00164818		Ascomycota	Leotiomycetes	Leotiomycetes order incertae sedis	Leotiomycetes family incertae sedis	Clavidisculum		litter_saprotroph					leaf/fruit/seed					filamentous_mycelium	perithecium_(hymenium_hidden,_narrow_opening)	closed					0	animal_parasite	litter_saprotroph	0	root_endophyte_dark_septate	root-associated	leaf/fruit/seed,animal_material	0	partly_aquatic	animal_parasite/opportunistic_human_parasite	0	dimorphic_yeast	0	0	0	0	0	0
OTU0022	Rhodotorula	1.63458	0	jrk11121	Ascomycota	Sordariomycetes	Amphisphaeriales	Sporocadaceae	Heterotruncatella		plant_pathogen				leaf/fruit/seed_pathogen						filamentous_mycelium							0	unspecified_saprotroph	foliar_endophyte	0	foliar_endophyte	0	0	0	partly_aquatic	opportunistic_human_parasite	0	yeast	none	none	0	0	0	0
OTU0023	Cladosporium	0.142394	2.91563	jrk11128	Ascomycota	Sordariomycetes	Chaetosphaeriales	Chaetosphaeriales family incertae sedis	Neoleptosporella		wood_saprotroph					wood					filamentous_mycelium							0	litter_saprotroph	plant_pathogen	hypervariable	foliar_endophyte	leaf/fruit/seed_pathogen	wood,leaf/fruit/seed,soil,dung,animal_material	0	partly_aquatic	animal_parasite	0	filamentous_mycelium	perithecium_(hymenium_hidden,_narrow_opening)	closed	0	0	0	0
OTU0024	Ascomycota genus Incertae sedis	0.0901546	2.94859	jrk11133	Ascomycota	Sordariomycetes	Delonicicolales	Delonicicolaceae	Furfurella		wood_saprotroph					wood					filamentous_mycelium							#N/A	#N/A	#N/A	#N/A	#N/A	#N/A	#N/A	#N/A	#N/A	#N/A	#N/A	#N/A	#N/A	#N/A	#N/A	#N/A	#N/A	#N/A
OTU0025	Ruhlandiella	0	2.53984	jrk11134	Ascomycota	Sordariomycetes	Diaporthales	Cryphonectriaceae	Capillaureum		plant_pathogen	wood_saprotroph			wood_pathogen	wood					filamentous_mycelium							0	ectomycorrhizal	0	0	0	0	0	0	non-aquatic	0	0	filamentous_mycelium	gasteroid-hypogeous	closed	short-distance_coarse	/terfezia-peziza_depressa	0	0
OTU0026	Pragmopora	1.1678	0	jrk11135	Ascomycota	Sordariomycetes	Diaporthales	Cryphonectriaceae	Chrysomorbus		plant_pathogen	wood_saprotroph			wood_pathogen	wood					filamentous_mycelium							0	wood_saprotroph	0	0	0	0	wood	0	non-aquatic	0	0	filamentous_mycelium	apothecium_(hymenium_on_surface)	smooth	0	0	0	0
OTU0027	Pseudogeomyces	0	2.169		Ascomycota	Sordariomycetes	Diaporthales	Cryphonectriaceae	Eriocamporesia		plant_pathogen	wood_saprotroph			wood_pathogen	wood					filamentous_mycelium							#N/A	#N/A	#N/A	#N/A	#N/A	#N/A	#N/A	#N/A	#N/A	#N/A	#N/A	#N/A	#N/A	#N/A	#N/A	#N/A	#N/A	#N/A
OTU0028	Pseudogymnoascus	0	2.14593	jrk11140	Ascomycota	Sordariomycetes	Diaporthales	Neomelanconiellaceae	Neomelanconiella		plant_pathogen	litter_saprotroph			leaf/fruit/seed_pathogen	leaf/fruit/seed				Combretum	filamentous_mycelium							0	soil_saprotroph	0	0	0	0	soil	0	partly_aquatic	opportunistic_animal_parasite_G._destructans	0	filamentous_mycelium	cleistothecium_(closed,_spherical)	closed	0	0	0	0
OTU0029	Penicillium	0.000842566	1.85255	jrk11177	Ascomycota	Sordariomycetes	Myrmecridiales	Myrmecridiaceae	Neomyrmecridium		litter_saprotroph					leaf/fruit/seed					filamentous_mycelium							0	unspecified_saprotroph	foliar_endophyte	toxin-producing,animal_parasite_some_species,mycoparasite_some_species	foliar_endophyte	0	soil	mold	partly_aquatic	opportunistic_human_parasite	0	filamentous_mycelium	0	0	0	0	0	0
OTU0030	Fungi genus Incertae sedis	0.28563	1.03176	jrk11178	Ascomycota	Sordariomycetes	Myrmecridiales	Xenodactylariaceae	Xenodactylaria		litter_saprotroph					leaf/fruit/seed					filamentous_mycelium							#N/A	#N/A	#N/A	#N/A	#N/A	#N/A	#N/A	#N/A	#N/A	#N/A	#N/A	#N/A	#N/A	#N/A	#N/A	#N/A	#N/A	#N/A
OTU0031	Penicillium	0.00926823	1.54929	jrk11185	Ascomycota	Sordariomycetes	Xenospadicoidales	Xenospadicoidaceae	Pseudodiplococcium		litter_saprotroph					leaf/fruit/seed					filamentous_mycelium							0	unspecified_saprotroph	foliar_endophyte	toxin-producing,animal_parasite_some_species,mycoparasite_some_species	foliar_endophyte	0	soil	mold	partly_aquatic	opportunistic_human_parasite	0	filamentous_mycelium	0	0	0	0	0	0
OTU0032	Lophium	0.778531	0		Basidiomycota	Agaricomycetes	Auriculariales	Auriculariaceae	Adustochaete		wood_saprotroph					wood		non-aquatic			filamentous_mycelium	corticioid	hydnoid					0	litter_saprotroph	0	0	0	0	leaf/fruit/seed	0	non-aquatic	0	0	filamentous_mycelium	0	0	0	0	0	0
OTU0033	Mytilinidion	0.772633	0		Basidiomycota	Agaricomycetes	Auriculariales	Auriculariaceae	Metulochaete		wood_saprotroph					wood		non-aquatic			filamentous_mycelium	corticioid	hydnoid					0	wood_saprotroph	0	0	0	0	wood	soft_rot	non-aquatic	0	0	filamentous_mycelium	hysterothecium_(opening_slith-like)	closed	0	0	0	0
OTU0034	Sarea	0.743986	0		Basidiomycota	Agaricomycetes	Auriculariales	Auriculariaceae	Proterochaete		wood_saprotroph					wood		non-aquatic			filamentous_mycelium	corticioid	other					0	unspecified_saprotroph	0	0	0	0	0	0	0	0	0	filamentous_mycelium	apothecium_(hymenium_on_surface)	smooth	0	0	0	0
OTU0035	Sagenomella	0	1.43062		Basidiomycota	Agaricomycetes	Auriculariales	Auriculariaceae	Psilochaete		wood_saprotroph					wood					filamentous_mycelium	tremelloid	smooth					0	unspecified_saprotroph	0	rock-inhabiting_some_species,animal_parasite_some_species	0	0	0	mold	0	opportunistic_human_parasite	0	filamentous_mycelium	0	0	0	0	0	0
OTU0036	Penicillago	0	1.37293		Basidiomycota	Agaricomycetes	Hymenochaetales	Hymenochaetales family incertae sedis	Pekloderma	synonym of Kurtia	wood_saprotroph	ericoid_mycorrhizal				wood		non-aquatic			filamentous_mycelium	corticioid	smooth					#N/A	#N/A	#N/A	#N/A	#N/A	#N/A	#N/A	#N/A	#N/A	#N/A	#N/A	#N/A	#N/A	#N/A	#N/A	#N/A	#N/A	#N/A
OTU0037	Acremonium	0	1.36304	jrk11219	Basidiomycota	Agaricomycetes	Polyporales	Meruliaceae	Geesterania		wood_saprotroph					wood		non-aquatic			filamentous_mycelium	polyporoid	poroid					0	unspecified_saprotroph	foliar_endophyte	hypervariable	foliar_endophyte	leaf/fruit/seed_pathogen	leaf/fruit/seed,soil,dung,animal_material	soft_rot	partly_aquatic	0	0	filamentous_mycelium	0	0	0	0	0	0
OTU0038	Dothideomycetes genus Incertae sedis	0.667313	0	jrk11000	Ascomycota	Arthoniomycetes	Arthoniales	Arthoniaceae	Staurospora		lichenized							non-aquatic			thallus_photosynthetic	apothecium_(hymenium_on_surface)	smooth			trentepohlioid		#N/A	#N/A	#N/A	#N/A	#N/A	#N/A	#N/A	#N/A	#N/A	#N/A	#N/A	#N/A	#N/A	#N/A	#N/A	#N/A	#N/A	#N/A
OTU0039	Oidiodendron	0	1.25591	jrk11001	Ascomycota	Arthoniomycetes	Arthoniales	Chrysotrichaceae	Galbinothrix		lichenized							non-aquatic			thallus_photosynthetic	apothecium_(hymenium_on_surface)	smooth			chlorococcoid		0	soil_saprotroph	root_endophyte	ericoid_mycorrhizal_O._maius	root_endophyte	root-associated	soil	0	partly_aquatic	0	0	filamentous_mycelium	0	0	0	0	0	0
OTU0040	Sporidiobolaceae genus Incertae sedis	0.615916	0	jrk11002	Ascomycota	Ascomycota class incertae sedis	Ascomycota order incertae sedis	Ascomycota family incertae sedis	Amylogalla		lichen_parasite	fungal_decomposer				fungal_material,algal_material		non-aquatic				apothecium_(hymenium_on_surface)	smooth					#N/A	#N/A	#N/A	#N/A	#N/A	#N/A	#N/A	#N/A	#N/A	#N/A	#N/A	#N/A	#N/A	#N/A	#N/A	#N/A	#N/A	#N/A
OTU0041	Scedosporium	0.555251	0	jrk11003	Ascomycota	Ascomycota class incertae sedis	Ascomycota order incertae sedis	Ascomycota family incertae sedis	Craspedodidymella		wood_saprotroph					wood		non-aquatic			filamentous_mycelium							0	soil_saprotroph	animal_parasite	0	0	0	soil,animal_material	0	non-aquatic	opportunistic_human_parasite	0	filamentous_mycelium	cleistothecium_(closed,_spherical)	closed	0	0	0	0
OTU0042	Hypocreales genus Incertae sedis	0	0.804312	jrk11004	Ascomycota	Ascomycota class incertae sedis	Ascomycota order incertae sedis	Ascomycota family incertae sedis	Crousobrauniella		plant_pathogen				leaf/fruit/seed_pathogen			non-aquatic		Shorea								#N/A	#N/A	#N/A	#N/A	#N/A	#N/A	#N/A	#N/A	#N/A	#N/A	#N/A	#N/A	#N/A	#N/A	#N/A	#N/A	#N/A	#N/A
OTU0043	Sarea	0.41033	0	jrk11005	Ascomycota	Ascomycota class incertae sedis	Ascomycota order incertae sedis	Ascomycota family incertae sedis	Hyalodermella																			0	unspecified_saprotroph	0	0	0	0	0	0	0	0	0	filamentous_mycelium	apothecium_(hymenium_on_surface)	smooth	0	0	0	0
OTU0044	Penicillium	0	0.784533	jrk11006	Ascomycota	Ascomycota class incertae sedis	Ascomycota order incertae sedis	Ascomycota family incertae sedis	Saania		lichen_parasite	fungal_decomposer				fungal_material,algal_material		non-aquatic				perithecium_(hymenium_hidden,_narrow_opening)	closed					0	unspecified_saprotroph	foliar_endophyte	toxin-producing,animal_parasite_some_species,mycoparasite_some_species	foliar_endophyte	0	soil	mold	partly_aquatic	opportunistic_human_parasite	0	filamentous_mycelium	0	0	0	0	0	0
OTU0045	Aspergillus	0.394321	0.00164818	jrk11007	Ascomycota	Ascomycota class incertae sedis	Ascomycota order incertae sedis	Ascomycota family incertae sedis	Vizellopsidites	fossil	plant_pathogen				unspecified_plant_pathogen													0	unspecified_saprotroph	foliar_endophyte	hypervariable,_saprotroph_animal_pathogen_endophyte	foliar_endophyte	0	leaf/fruit/seed,soil,dung,animal_material	mold	partly_aquatic	animal_parasite/opportunistic_human_parasite	0	filamentous_mycelium	0	0	0	0	0	0
OTU0046	Aspergillus	0.313435	0.154929	jrk11008	Ascomycota	Dothideomycetes	Asterinales	Asterinaceae	Asterostomella		plant_pathogen	foliar_endophyte		foliar_endophyte	leaf/fruit/seed_pathogen			non-aquatic			filamentous_mycelium							0	unspecified_saprotroph	foliar_endophyte	hypervariable,_saprotroph_animal_pathogen_endophyte	foliar_endophyte	0	leaf/fruit/seed,soil,dung,animal_material	mold	partly_aquatic	animal_parasite/opportunistic_human_parasite	0	filamentous_mycelium	0	0	0	0	0	0
OTU0047	Neodevriesiaceae genus Incertae sedis	0.375785	0	jrk11011	Ascomycota	Dothideomycetes	Botryosphaeriales	Planistromellaceae	Mycosphaerellopsis		litter_saprotroph					leaf/fruit/seed		non-aquatic			filamentous_mycelium							#N/A	#N/A	#N/A	#N/A	#N/A	#N/A	#N/A	#N/A	#N/A	#N/A	#N/A	#N/A	#N/A	#N/A	#N/A	#N/A	#N/A	#N/A
OTU0048	Oidiodendron	0.336184	0.00988908	jrk11012	Ascomycota	Dothideomycetes	Botryosphaeriales	Planistromellaceae	Planistroma		litter_saprotroph	wood_saprotroph				wood,leaf/fruit/seed		non-aquatic			filamentous_mycelium							0	soil_saprotroph	root_endophyte	ericoid_mycorrhizal_O._maius	root_endophyte	root-associated	soil	0	partly_aquatic	0	0	filamentous_mycelium	0	0	0	0	0	0
OTU0049	Myriangiales genus Incertae sedis	0.333656	0	jrk11013	Ascomycota	Dothideomycetes	Capnodiales	Aeminiaceae	Aeminium		sooty_mold	litter_saprotroph				leaf/fruit/seed,sugar-rich_substrates	mold	non-aquatic			filamentous_mycelium							#N/A	#N/A	#N/A	#N/A	#N/A	#N/A	#N/A	#N/A	#N/A	#N/A	#N/A	#N/A	#N/A	#N/A	#N/A	#N/A	#N/A	#N/A
OTU0050	Paraphoma	0.196318	0.268653	jrk11014	Ascomycota	Dothideomycetes	Capnodiales	Dissoconiaceae	Globoramichloridium												filamentous_mycelium							0	plant_pathogen	wood_saprotroph	0	no_endophytic_capacity	wood_pathogen	wood	0	partly_aquatic	0	0	filamentous_mycelium	0	0	0	0	0	0
OTU0051	Amorphotheca	0.332814	0	jrk11015	Ascomycota	Dothideomycetes	Capnodiales	Extremaceae	Paradevriesia												filamentous_mycelium							0	unspecified_saprotroph	0	extremophile_hydrocarbon-rich_substrates_(fuel)	0	0	hydrocarbon-rich_substrates_(fuel)	0	partly_aquatic	0	0	filamentous_mycelium	0	0	0	0	0	0
OTU0052	Yamadazyma	0.31849	0	jrk11016	Ascomycota	Dothideomycetes	Capnodiales	Mycosphaerellaceae	Ceratosperma												filamentous_mycelium							0	nectar/tap_saprotroph	0	0	0	0	sugar-rich_substrates	0	partly_aquatic	arthropod-associated	0	yeast	none	none	0	0	0	0
OTU0053	Exophiala	0.246029	0.117021	jrk11017	Ascomycota	Dothideomycetes	Capnodiales	Mycosphaerellaceae	Plurivorosphaerella		plant_pathogen				leaf/fruit/seed_pathogen			non-aquatic			filamentous_mycelium							0	animal_parasite	litter_saprotroph	0	root_endophyte_dark_septate	root-associated	leaf/fruit/seed,animal_material	0	partly_aquatic	animal_parasite/opportunistic_human_parasite	0	dimorphic_yeast	0	0	0	0	0	0
OTU0054	Rhizopogon	0	0.598289	jrk11018	Ascomycota	Dothideomycetes	Capnodiales	Phaeothecoidiellaceae	Nowamyces		plant_pathogen				leaf/fruit/seed_pathogen			non-aquatic		Eucalyptus	filamentous_mycelium							0	ectomycorrhizal	0	0	0	0	0	0	non-aquatic	0	Pinaceae	filamentous_mycelium	gasteroid	closed	long-distance	/suillus-rhizopogon	0	0
OTU0055	Phallus	0.000842566	0.586752		Ascomycota	Dothideomycetes	Capnodiales	Teratosphaeriaceae	Lawreya		lichen_parasite	fungal_decomposer				fungal_material,algal_material		non-aquatic			filamentous_mycelium	none	none					0	soil_saprotroph	0	0	0	0	soil	0	non-aquatic	0	0	filamentous_mycelium	phalloid	gel	0	0	0	0
OTU0056	Pseudeurotium	0	0.576863	jrk11019	Ascomycota	Dothideomycetes	Capnodiales	Xenodevriesiaceae	Xenodevriesia		plant_pathogen				unspecified_plant_pathogen			non-aquatic		Strelitzia	filamentous_mycelium							0	dung_saprotroph	soil_saprotroph	0	0	0	soil,dung	0	partly_aquatic	0	0	filamentous_mycelium	cleistothecium_(closed,_spherical)	closed	0	0	0	0
OTU0057	Laccaria	0	0.573566	jrk11020	Ascomycota	Dothideomycetes	Dothideales	Neocelosporiaceae	Neocelosporium									non-aquatic		Eucalyptus	filamentous_mycelium							0	ectomycorrhizal	0	0	0	0	0	0	non-aquatic	0	0	filamentous_mycelium	agaricoid	gills	short-distance_delicate	/laccaria	0	0
OTU0058	Pseudeurotium	0	0.571918		Ascomycota	Dothideomycetes	Dothideomycetes order incertae sedis	Dothideomycetes family incertae sedis	Pseudoconlarium		wood_saprotroph					wood												0	dung_saprotroph	soil_saprotroph	0	0	0	soil,dung	0	partly_aquatic	0	0	filamentous_mycelium	cleistothecium_(closed,_spherical)	closed	0	0	0	0
OTU0059	Paratritirachium	0.25277	0	jrk11021	Ascomycota	Dothideomycetes	Dothideomycetes order incertae sedis	Neoparodiaceae	Neoparodia		plant_pathogen				leaf/fruit/seed_pathogen			non-aquatic		Trema	filamentous_mycelium							0	soil_saprotroph	0	extremophile_thermophile	no_endophytic_capacity	0	soil	0	non-aquatic	0	0	filamentous_mycelium	none	none	0	0	0	0
OTU0060	Naematelia	0.235919	0	jrk11022	Ascomycota	Dothideomycetes	Dothideomycetes order incertae sedis	Paranectriellaceae	Araneomyces		litter_saprotroph			no_endophytic_capacity		leaf/fruit/seed		non-aquatic			filamentous_mycelium							0	mycoparasite	fungal_decomposer	0	0	0	fungal_material	0	non-aquatic	0	0	dimorphic_yeast	tremelloid	0	0	0	0	0
OTU0061	Basidiomycota genus Incertae sedis	0.22665	0	jrk11024	Ascomycota	Dothideomycetes	Dothideomycetes order incertae sedis	Trichothyriaceae	Lichenopeltella		lichen_parasite	fungal_decomposer				fungal_material,algal_material					filamentous_mycelium							#N/A	#N/A	#N/A	#N/A	#N/A	#N/A	#N/A	#N/A	#N/A	#N/A	#N/A	#N/A	#N/A	#N/A	#N/A	#N/A	#N/A	#N/A
OTU0062	Pseudeurotium	0.00589797	0.42523	jrk11025	Ascomycota	Dothideomycetes	Dothideomycetes order incertae sedis	Trichothyriaceae	Pachythyrium		mycoparasite	fungal_decomposer				fungal_material				Diatrypaceae	filamentous_mycelium							0	dung_saprotroph	soil_saprotroph	0	0	0	soil,dung	0	partly_aquatic	0	0	filamentous_mycelium	cleistothecium_(closed,_spherical)	closed	0	0	0	0
OTU0063	Hygrocybe	0	0.423582	jrk11026	Ascomycota	Dothideomycetes	Dothideomycetes order incertae sedis	Trichothyriaceae	Trichothyrium		unspecified_saprotroph	mycoparasite				fungal_material					filamentous_mycelium							0	soil_saprotroph	unspecified_symbiotroph	CHEGD_symbiotrophs	root-associated	root-associated	roots,soil	0	non-aquatic	0	0	filamentous_mycelium	agaricoid	gills	0	0	0	0
OTU0064	Pseudeurotium	0	0.392267	jrk11027	Ascomycota	Dothideomycetes	Eremithallales	Melaspileaceae	Eremithallus		lichenized							non-aquatic			thallus_photosynthetic					trentepohlioid		0	dung_saprotroph	soil_saprotroph	0	0	0	soil,dung	0	partly_aquatic	0	0	filamentous_mycelium	cleistothecium_(closed,_spherical)	closed	0	0	0	0
OTU0065	Herpotrichiellaceae genus Incertae sedis	0.18705	0.00988908		Ascomycota	Dothideomycetes	Jahnulales	Aliquandostipitaceae	Neojahnula		wood_saprotroph					wood		freshwater			filamentous_mycelium	perithecium_(hymenium_hidden,_narrow_opening)	closed					#N/A	#N/A	#N/A	#N/A	#N/A	#N/A	#N/A	#N/A	#N/A	#N/A	#N/A	#N/A	#N/A	#N/A	#N/A	#N/A	#N/A	#N/A
OTU0066	Dothideomycetes genus Incertae sedis	0.19042	0		Ascomycota	Dothideomycetes	Jahnulales	Aliquandostipitaceae	Pseudojahnula		wood_saprotroph					wood		freshwater			filamentous_mycelium	perithecium_(hymenium_hidden,_narrow_opening)	closed					#N/A	#N/A	#N/A	#N/A	#N/A	#N/A	#N/A	#N/A	#N/A	#N/A	#N/A	#N/A	#N/A	#N/A	#N/A	#N/A	#N/A	#N/A
OTU0067	Clavaria	0	0.357655	jrk11029	Ascomycota	Dothideomycetes	Muyocopronales	Muyocopronaceae	Neomycoleptodiscus		litter_saprotroph					leaf/fruit/seed		non-aquatic		Gyranthera	filamentous_mycelium							0	soil_saprotroph	unspecified_symbiotroph	CHEGD_symbiotrophs	root-associated	root-associated	roots,soil	0	non-aquatic	0	0	filamentous_mycelium	clavarioid	smooth	0	0	0	0
OTU0068	Beskidomyces	0.00168513	0.354359		Ascomycota	Dothideomycetes	Muyocopronales	Muyocopronaceae	Pseudopalawania		litter_saprotroph					leaf/fruit/seed		non-aquatic			filamentous_mycelium	perithecium_(hymenium_hidden,_narrow_opening)	closed					#N/A	#N/A	#N/A	#N/A	#N/A	#N/A	#N/A	#N/A	#N/A	#N/A	#N/A	#N/A	#N/A	#N/A	#N/A	#N/A	#N/A	#N/A
OTU0069	Exobasidiaceae genus Incertae sedis	0.169356	0.0148336		Ascomycota	Dothideomycetes	Muyocopronales	Muyocopronaceae	Setoapiospora		wood_saprotroph					wood		non-aquatic			filamentous_mycelium	perithecium_(hymenium_hidden,_narrow_opening)	closed					#N/A	#N/A	#N/A	#N/A	#N/A	#N/A	#N/A	#N/A	#N/A	#N/A	#N/A	#N/A	#N/A	#N/A	#N/A	#N/A	#N/A	#N/A
OTU0070	Aspergillus	0	0.34447	jrk11030	Ascomycota	Dothideomycetes	Pleosporales	Aigialaceae	Posidoniomyces		root_endophyte			root_endophyte_dark_septate				marine		Posidonia	filamentous_mycelium							0	unspecified_saprotroph	foliar_endophyte	hypervariable,_saprotroph_animal_pathogen_endophyte	foliar_endophyte	0	leaf/fruit/seed,soil,dung,animal_material	mold	partly_aquatic	animal_parasite/opportunistic_human_parasite	0	filamentous_mycelium	0	0	0	0	0	0
OTU0071	Spizellomycetales genus Incertae sedis	0	0.34447	jrk11031	Ascomycota	Dothideomycetes	Pleosporales	Amorosiaceae	Alfoldia		root_endophyte			root_endophyte				non-aquatic		Juniperus	filamentous_mycelium							#N/A	#N/A	#N/A	#N/A	#N/A	#N/A	#N/A	#N/A	#N/A	#N/A	#N/A	#N/A	#N/A	#N/A	#N/A	#N/A	#N/A	#N/A
OTU0072	Ciliolarina	0.170198	0	jrk11032	Ascomycota	Dothideomycetes	Pleosporales	Amorosiaceae	Amorocoelophoma		litter_saprotroph					leaf/fruit/seed		non-aquatic			filamentous_mycelium							0	wood_saprotroph	0	0	0	0	wood	0	non-aquatic	0	Pinaceae	filamentous_mycelium	apothecium_(hymenium_on_surface)	smooth	0	0	0	0
OTU0073	Neodevriesia	0.0109534	0.293376	jrk11033	Ascomycota	Dothideomycetes	Pleosporales	Anteagloniaceae	Purplema												filamentous_mycelium							0	plant_pathogen	litter_saprotroph	0	0	leaf/fruit/seed_pathogen	leaf/fruit/seed	0	partly_aquatic	0	0	filamentous_mycelium	perithecium_(hymenium_hidden,_narrow_opening)	closed	0	0	0	0
OTU0074	Rhinocladiella	0	0.313154	jrk11034	Ascomycota	Dothideomycetes	Pleosporales	Astrosphaeriellaceae	Quercicola		litter_saprotroph					leaf/fruit/seed		non-aquatic		Quercus	filamentous_mycelium							0	soil_saprotroph	animal_parasite	0	root_endophyte_dark_septate	root-associated	soil,animal_material	0	partly_freshwater_(partly_non-aquatic)	animal_parasite/opportunistic_human_parasite	0	dimorphic_yeast	0	0	0	0	0	0
OTU0075	Phaeomoniella	0.155875	0	jrk11035	Ascomycota	Dothideomycetes	Pleosporales	Astrosphaeriellaceae	Xenoastrosphaeriella		unspecified_saprotroph							non-aquatic			filamentous_mycelium							0	plant_pathogen	0	0	0	leaf/fruit/seed_pathogen	0	0	non-aquatic	0	0	dimorphic_yeast	0	0	0	0	0	0
OTU0076	Hyaloscyphaceae genus Incertae sedis	0.139023	0.01813		Ascomycota	Dothideomycetes	Pleosporales	Bambusicolaceae	Corylicola		wood_saprotroph					wood		non-aquatic			filamentous_mycelium	perithecium_(hymenium_hidden,_narrow_opening)	closed					#N/A	#N/A	#N/A	#N/A	#N/A	#N/A	#N/A	#N/A	#N/A	#N/A	#N/A	#N/A	#N/A	#N/A	#N/A	#N/A	#N/A	#N/A
OTU0077	Rhinocladiella	0.146607	0	jrk11036	Ascomycota	Dothideomycetes	Pleosporales	Bambusicolaceae	Leucaenicola		litter_saprotroph					leaf/fruit/seed		non-aquatic			filamentous_mycelium							0	soil_saprotroph	animal_parasite	0	root_endophyte_dark_septate	root-associated	soil,animal_material	0	partly_freshwater_(partly_non-aquatic)	animal_parasite/opportunistic_human_parasite	0	dimorphic_yeast	0	0	0	0	0	0
OTU0078	Claussenomyces	0.133126	0	jrk11037	Ascomycota	Dothideomycetes	Pleosporales	Corynesporascaceae	Corynesporasca		litter_saprotroph					leaf/fruit/seed		non-aquatic		Caryota	filamentous_mycelium							0	wood_saprotroph	0	0	0	0	wood	0	non-aquatic	0	0	filamentous_mycelium	apothecium_(hymenium_on_surface)	smooth	0	0	0	0
OTU0079	Penicillium	0	0.257116	jrk11038	Ascomycota	Dothideomycetes	Pleosporales	Cucurbitariaceae	Synfenestella		plant_pathogen				leaf/fruit/seed_pathogen			non-aquatic			filamentous_mycelium							0	unspecified_saprotroph	foliar_endophyte	toxin-producing,animal_parasite_some_species,mycoparasite_some_species	foliar_endophyte	0	soil	mold	partly_aquatic	opportunistic_human_parasite	0	filamentous_mycelium	0	0	0	0	0	0
OTU0080	Lecanoromycetes genus Incertae sedis	0.130598	0	jrk11039	Ascomycota	Dothideomycetes	Pleosporales	Dictyosporiaceae	Pseudoconiothyrium									non-aquatic			filamentous_mycelium							#N/A	#N/A	#N/A	#N/A	#N/A	#N/A	#N/A	#N/A	#N/A	#N/A	#N/A	#N/A	#N/A	#N/A	#N/A	#N/A	#N/A	#N/A
OTU0081	Gymnoascus	0.120487	0.01813	jrk11040	Ascomycota	Dothideomycetes	Pleosporales	Didymellaceae	Sphaeronaema												filamentous_mycelium							0	soil_saprotroph	0	0	0	0	soil	0	non-aquatic	0	0	filamentous_mycelium	cleistothecium_(closed,_spherical)	closed	0	0	0	0
OTU0082	Exophiala	0.12133	0.0115373		Ascomycota	Dothideomycetes	Pleosporales	Didymellaceae	Vandijckomycella		soil_saprotroph					soil		non-aquatic			filamentous_mycelium							0	animal_parasite	litter_saprotroph	0	root_endophyte_dark_septate	root-associated	leaf/fruit/seed,animal_material	0	partly_aquatic	animal_parasite/opportunistic_human_parasite	0	dimorphic_yeast	0	0	0	0	0	0
OTU0083	Rhizopogon	0	0.23569		Ascomycota	Dothideomycetes	Pleosporales	Didymosphaeriaceae	Chromolaenicola		wood_saprotroph	litter_saprotroph				wood,leaf/fruit/seed		non-aquatic			filamentous_mycelium	perithecium_(hymenium_hidden,_narrow_opening)	closed					0	ectomycorrhizal	0	0	0	0	0	0	non-aquatic	0	Pinaceae	filamentous_mycelium	gasteroid	closed	long-distance	/suillus-rhizopogon	0	0
OTU0084	Septonema	0.115432	0	jrk11041	Ascomycota	Dothideomycetes	Pleosporales	Didymosphaeriaceae	Neptunomyces									aquatic		algae	filamentous_mycelium							0	wood_saprotroph	0	0	0	0	wood	soft_rot	non-aquatic	0	0	filamentous_mycelium	0	0	0	0	0	0
OTU0085	Exophiala	0.109534	0		Ascomycota	Dothideomycetes	Pleosporales	Didymosphaeriaceae	Pseudodidymocyrtis		lichen_parasite	fungal_decomposer				fungal_material,algal_material		non-aquatic			filamentous_mycelium	perithecium_(hymenium_hidden,_narrow_opening)	closed					0	animal_parasite	litter_saprotroph	0	root_endophyte_dark_septate	root-associated	leaf/fruit/seed,animal_material	0	partly_aquatic	animal_parasite/opportunistic_human_parasite	0	dimorphic_yeast	0	0	0	0	0	0
OTU0086	Chaetothyriales genus Incertae sedis	0.107849	0		Ascomycota	Dothideomycetes	Pleosporales	Latoruaceae	Triseptata		wood_saprotroph					wood		non-aquatic			filamentous_mycelium	perithecium_(hymenium_hidden,_narrow_opening)	closed					#N/A	#N/A	#N/A	#N/A	#N/A	#N/A	#N/A	#N/A	#N/A	#N/A	#N/A	#N/A	#N/A	#N/A	#N/A	#N/A	#N/A	#N/A
OTU0087	Erythrobasidiales genus Incertae sedis	0.107006	0		Ascomycota	Dothideomycetes	Pleosporales	Lentitheciaceae	Pseudomurilentithecium		litter_saprotroph					leaf/fruit/seed		non-aquatic			filamentous_mycelium							#N/A	#N/A	#N/A	#N/A	#N/A	#N/A	#N/A	#N/A	#N/A	#N/A	#N/A	#N/A	#N/A	#N/A	#N/A	#N/A	#N/A	#N/A
OTU0088	Oidiodendron	0	0.201078		Ascomycota	Dothideomycetes	Pleosporales	Leptosphaeriaceae	Ochraceocephala		plant_pathogen				leaf/fruit/seed_pathogen			non-aquatic			filamentous_mycelium							0	soil_saprotroph	root_endophyte	ericoid_mycorrhizal_O._maius	root_endophyte	root-associated	soil	0	partly_aquatic	0	0	filamentous_mycelium	0	0	0	0	0	0
OTU0089	Penicillium	0	0.201078	jrk11042	Ascomycota	Dothideomycetes	Pleosporales	Leptosphaeriaceae	Pseudoleptosphaeria		plant_pathogen	wood_saprotroph			wood_pathogen	wood		non-aquatic		Populus	filamentous_mycelium							0	unspecified_saprotroph	foliar_endophyte	toxin-producing,animal_parasite_some_species,mycoparasite_some_species	foliar_endophyte	0	soil	mold	partly_aquatic	opportunistic_human_parasite	0	filamentous_mycelium	0	0	0	0	0	0
OTU0090	Exophiala	0.101951	0		Ascomycota	Dothideomycetes	Pleosporales	Leptosphaeriaceae	Sclerenchymomyces		wood_saprotroph					wood		non-aquatic			filamentous_mycelium	perithecium_(hymenium_hidden,_narrow_opening)	closed					0	animal_parasite	litter_saprotroph	0	root_endophyte_dark_septate	root-associated	leaf/fruit/seed,animal_material	0	partly_aquatic	animal_parasite/opportunistic_human_parasite	0	dimorphic_yeast	0	0	0	0	0	0
OTU0091	Rhodotorula	0.100265	0	jrk11043	Ascomycota	Dothideomycetes	Pleosporales	Ligninsphaeriaceae	Ligninsphaeriopsis												filamentous_mycelium							0	unspecified_saprotroph	foliar_endophyte	0	foliar_endophyte	0	0	0	partly_aquatic	opportunistic_human_parasite	0	yeast	none	none	0	0	0	0
OTU0092	Pseudopyrenochaeta	0	0.194485		Ascomycota	Dothideomycetes	Pleosporales	Longipedicellataceae	Submerspora		wood_saprotroph					wood		freshwater			filamentous_mycelium	perithecium_(hymenium_hidden,_narrow_opening)	closed					0	unspecified_saprotroph	0	0	no_endophytic_capacity	0	0	0	non-aquatic	0	0	filamentous_mycelium	0	0	0	0	0	0
OTU0093	Exobasidium	0.0968951	0.00164818		Ascomycota	Dothideomycetes	Pleosporales	Lophiostomataceae	Kiskunsagia		root_endophyte			root_endophyte		roots		non-aquatic										0	plant_pathogen	0	0	no_endophytic_capacity	leaf/fruit/seed_pathogen	0	0	non-aquatic	0	0	filamentous_mycelium	none	none	0	0	0	0
OTU0094		0.0176939	0.138447	jrk11045	Ascomycota	Dothideomycetes	Pleosporales	Massariaceae	Paramassaria		wood_saprotroph					wood		non-aquatic			filamentous_mycelium							#N/A	#N/A	#N/A	#N/A	#N/A	#N/A	#N/A	#N/A	#N/A	#N/A	#N/A	#N/A	#N/A	#N/A	#N/A	#N/A	#N/A	#N/A
OTU0095	Basidiomycota genus Incertae sedis	0	0.166466		Ascomycota	Dothideomycetes	Pleosporales	Morosphaeriaceae	Neohelicascus		wood_saprotroph					wood		freshwater			filamentous_mycelium	perithecium_(hymenium_hidden,_narrow_opening)	closed					#N/A	#N/A	#N/A	#N/A	#N/A	#N/A	#N/A	#N/A	#N/A	#N/A	#N/A	#N/A	#N/A	#N/A	#N/A	#N/A	#N/A	#N/A
OTU0096	Penicillium	0	0.164818	jrk11046	Ascomycota	Dothideomycetes	Pleosporales	Neohendersoniaceae	Neomedicopsis		wood_saprotroph					wood		non-aquatic			filamentous_mycelium							0	unspecified_saprotroph	foliar_endophyte	toxin-producing,animal_parasite_some_species,mycoparasite_some_species	foliar_endophyte	0	soil	mold	partly_aquatic	opportunistic_human_parasite	0	filamentous_mycelium	0	0	0	0	0	0
OTU0097	Rhizopogon	0	0.154929		Ascomycota	Dothideomycetes	Pleosporales	Neomassarinaceae	Pseudohelminthosporium		wood_saprotroph					wood		non-aquatic			filamentous_mycelium	perithecium_(hymenium_hidden,_narrow_opening)	closed					0	ectomycorrhizal	0	0	0	0	0	0	non-aquatic	0	Pinaceae	filamentous_mycelium	gasteroid	closed	long-distance	/suillus-rhizopogon	0	0
OTU0098	Aspergillus	0.0783587	0	jrk11047	Ascomycota	Dothideomycetes	Pleosporales	Occultibambusaceae	Brunneofusispora		wood_saprotroph					wood		non-aquatic			filamentous_mycelium							0	unspecified_saprotroph	foliar_endophyte	hypervariable,_saprotroph_animal_pathogen_endophyte	foliar_endophyte	0	leaf/fruit/seed,soil,dung,animal_material	mold	partly_aquatic	animal_parasite/opportunistic_human_parasite	0	filamentous_mycelium	0	0	0	0	0	0
OTU0099	Penicillium	0	0.151633	jrk11048	Ascomycota	Dothideomycetes	Pleosporales	Parabambusicolaceae	Lonicericola		wood_saprotroph					wood					filamentous_mycelium							0	unspecified_saprotroph	foliar_endophyte	toxin-producing,animal_parasite_some_species,mycoparasite_some_species	foliar_endophyte	0	soil	mold	partly_aquatic	opportunistic_human_parasite	0	filamentous_mycelium	0	0	0	0	0	0
OTU0100	Penicillium	0.00168513	0.14504		Ascomycota	Dothideomycetes	Pleosporales	Parabambusicolaceae	Paramonodictys		wood_saprotroph					wood		non-aquatic			filamentous_mycelium	perithecium_(hymenium_hidden,_narrow_opening)	closed					0	unspecified_saprotroph	foliar_endophyte	toxin-producing,animal_parasite_some_species,mycoparasite_some_species	foliar_endophyte	0	soil	mold	partly_aquatic	opportunistic_human_parasite	0	filamentous_mycelium	0	0	0	0	0	0
OTU0101	Penicillium	0	0.14504	jrk11050	Ascomycota	Dothideomycetes	Pleosporales	Paralophiostomataceae	Paralophiostoma																			0	unspecified_saprotroph	foliar_endophyte	toxin-producing,animal_parasite_some_species,mycoparasite_some_species	foliar_endophyte	0	soil	mold	partly_aquatic	opportunistic_human_parasite	0	filamentous_mycelium	0	0	0	0	0	0
OTU0102	Penicillium	0	0.133503		Ascomycota	Dothideomycetes	Pleosporales	Phaeoseptaceae	Pleopunctum		wood_saprotroph					wood		non-aquatic			filamentous_mycelium	perithecium_(hymenium_hidden,_narrow_opening)	closed					0	unspecified_saprotroph	foliar_endophyte	toxin-producing,animal_parasite_some_species,mycoparasite_some_species	foliar_endophyte	0	soil	mold	partly_aquatic	opportunistic_human_parasite	0	filamentous_mycelium	0	0	0	0	0	0
OTU0103	Penicillium	0.000842566	0.131854	jrk11051	Ascomycota	Dothideomycetes	Pleosporales	Phaeosphaeriaceae	Amarenomyces		unspecified_saprotroph							non-aquatic			filamentous_mycelium							0	unspecified_saprotroph	foliar_endophyte	toxin-producing,animal_parasite_some_species,mycoparasite_some_species	foliar_endophyte	0	soil	mold	partly_aquatic	opportunistic_human_parasite	0	filamentous_mycelium	0	0	0	0	0	0
OTU0104	Rhizopogon	0	0.12691		Ascomycota	Dothideomycetes	Pleosporales	Phaeosphaeriaceae	Bhagirathimyces		unspecified_saprotroph							partly_freshwater_(partly_non-aquatic)			filamentous_mycelium	perithecium_(hymenium_hidden,_narrow_opening)	closed					0	ectomycorrhizal	0	0	0	0	0	0	non-aquatic	0	Pinaceae	filamentous_mycelium	gasteroid	closed	long-distance	/suillus-rhizopogon	0	0
OTU0105	Umbelopsis	0	0.123613	jrk11052	Ascomycota	Dothideomycetes	Pleosporales	Phaeosphaeriaceae	Brunneomurispora		wood_saprotroph					wood					filamentous_mycelium							0	soil_saprotroph	root-associated	0	root-associated	root-associated	roots,soil	mold	non-aquatic	0	0	filamentous_mycelium	none	none	0	0	0	0
OTU0106	Ochroconis	0.0631925	0		Ascomycota	Dothideomycetes	Pleosporales	Phaeosphaeriaceae	Hydeopsis		wood_saprotroph					wood		non-aquatic			filamentous_mycelium	perithecium_(hymenium_hidden,_narrow_opening)	closed					0	animal_parasite	plant_pathogen	0	0	leaf/fruit/seed_pathogen	leaf/fruit/seed,animal_material	0	partly_aquatic	opportunistic_human_parasite	0	filamentous_mycelium	perithecium_(hymenium_hidden,_narrow_opening)	closed	0	0	0	0
OTU0107		0.0623499	0	jrk11054	Ascomycota	Dothideomycetes	Pleosporales	Phaeosphaeriaceae	Jeremyomyces		wood_saprotroph					wood		non-aquatic			filamentous_mycelium							#N/A	#N/A	#N/A	#N/A	#N/A	#N/A	#N/A	#N/A	#N/A	#N/A	#N/A	#N/A	#N/A	#N/A	#N/A	#N/A	#N/A	#N/A
OTU0108	Proliferophialis	0	0.121965		Ascomycota	Dothideomycetes	Pleosporales	Phaeosphaeriaceae	Kwanghwana		plant_pathogen	litter_saprotroph			leaf/fruit/seed_pathogen	leaf/fruit/seed		non-aquatic			filamentous_mycelium	perithecium_(hymenium_hidden,_narrow_opening)	closed					#N/A	#N/A	#N/A	#N/A	#N/A	#N/A	#N/A	#N/A	#N/A	#N/A	#N/A	#N/A	#N/A	#N/A	#N/A	#N/A	#N/A	#N/A
OTU0109	Hohenbuehelia	0.0598222	0		Ascomycota	Dothideomycetes	Pleosporales	Phaeosphaeriaceae	Murichromolaenicola		wood_saprotroph					wood		non-aquatic			filamentous_mycelium	perithecium_(hymenium_hidden,_narrow_opening)	closed					0	wood_saprotroph	nematophagous	0	0	0	wood,animal_material	white_rot	non-aquatic	nematophagous	0	filamentous_mycelium	agaricoid	gills	0	0	0	0
OTU0110	Exophiala	0.0598222	0		Ascomycota	Dothideomycetes	Pleosporales	Phaeosphaeriaceae	Neoophiobolus		wood_saprotroph					wood		non-aquatic			filamentous_mycelium	perithecium_(hymenium_hidden,_narrow_opening)	closed					0	animal_parasite	litter_saprotroph	0	root_endophyte_dark_septate	root-associated	leaf/fruit/seed,animal_material	0	partly_aquatic	animal_parasite/opportunistic_human_parasite	0	dimorphic_yeast	0	0	0	0	0	0
OTU0111	Hyaloscypha	0	0.117021	jrk11055	Ascomycota	Dothideomycetes	Pleosporales	Phaeosphaeriaceae	Neostagonosporella		wood_saprotroph					wood		non-aquatic			filamentous_mycelium							0	litter_saprotroph	wood_saprotroph	ectomycorrhizal_H._Bicolor,_H._Finlandica,_ericoid_mycorrhizal_H._Variabilis,_plant_pathogen_some_species	0	leaf/fruit/seed_pathogen	wood,leaf/fruit/seed	0	partly_freshwater_(partly_non-aquatic)	0	mosses	filamentous_mycelium	apothecium_(hymenium_on_surface)	smooth	0	0	0	0
OTU0112	Hyaloscypha	0.000842566	0.113724		Ascomycota	Dothideomycetes	Pleosporales	Phaeosphaeriaceae	Paraleptospora		wood_saprotroph					wood		non-aquatic			filamentous_mycelium	perithecium_(hymenium_hidden,_narrow_opening)	closed					0	litter_saprotroph	wood_saprotroph	ectomycorrhizal_H._Bicolor,_H._Finlandica,_ericoid_mycorrhizal_H._Variabilis,_plant_pathogen_some_species	0	leaf/fruit/seed_pathogen	wood,leaf/fruit/seed	0	partly_freshwater_(partly_non-aquatic)	0	mosses	filamentous_mycelium	apothecium_(hymenium_on_surface)	smooth	0	0	0	0
OTU0113	Keithomyces	0	0.110428		Ascomycota	Dothideomycetes	Pleosporales	Phaeosphaeriaceae	Paraloratospora		wood_saprotroph					wood		non-aquatic			filamentous_mycelium	perithecium_(hymenium_hidden,_narrow_opening)	closed					#N/A	#N/A	#N/A	#N/A	#N/A	#N/A	#N/A	#N/A	#N/A	#N/A	#N/A	#N/A	#N/A	#N/A	#N/A	#N/A	#N/A	#N/A
OTU0114	Neodevriesia	0.056452	0	jrk11056	Ascomycota	Dothideomycetes	Pleosporales	Phaeosphaeriaceae	Phaeoseptoriella		plant_pathogen				leaf/fruit/seed_pathogen						filamentous_mycelium							0	plant_pathogen	litter_saprotroph	0	0	leaf/fruit/seed_pathogen	leaf/fruit/seed	0	partly_aquatic	0	0	filamentous_mycelium	perithecium_(hymenium_hidden,_narrow_opening)	closed	0	0	0	0
OTU0115	Geomyces	0	0.10878		Ascomycota	Dothideomycetes	Pleosporales	Phaeosphaeriaceae	Pseudoophiosphaerella		wood_saprotroph					wood		non-aquatic			filamentous_mycelium	perithecium_(hymenium_hidden,_narrow_opening)	closed					0	soil_saprotroph	0	0	0	0	soil	0	partly_aquatic	0	0	filamentous_mycelium	cleistothecium_(closed,_spherical)	closed	0	0	0	0
OTU0116	Skoua	0	0.10878		Ascomycota	Dothideomycetes	Pleosporales	Phaeosphaeriaceae	Pseudostaurosphaeria		wood_saprotroph					wood		non-aquatic			filamentous_mycelium	perithecium_(hymenium_hidden,_narrow_opening)	closed					0	pollen_saprotroph	animal-associated	0	0	0	pollen	0	non-aquatic	arthropod-associated	Apis	filamentous_mycelium	0	0	0	0	0	0
OTU0117	Amauroascus	0	0.107132		Ascomycota	Dothideomycetes	Pleosporales	Phaeosphaeriaceae	Wingfieldomyces		litter_saprotroph	plant_pathogen			leaf/fruit/seed_pathogen	leaf/fruit/seed					filamentous_mycelium	perithecium_(hymenium_hidden,_narrow_opening)	closed					0	soil_saprotroph	animal_decomposer	0	0	0	soil,animal_material	keratinolytic	non-aquatic	0	0	filamentous_mycelium	cleistothecium_(closed,_spherical)	closed	0	0	0	0
OTU0118	Exophiala	0.0539243	0	jrk11058	Ascomycota	Dothideomycetes	Pleosporales	Phaeosphaeriaceae	Vittaliana		wood_saprotroph					wood		marine		Avicennia	filamentous_mycelium							0	animal_parasite	litter_saprotroph	0	root_endophyte_dark_septate	root-associated	leaf/fruit/seed,animal_material	0	partly_aquatic	animal_parasite/opportunistic_human_parasite	0	dimorphic_yeast	0	0	0	0	0	0
OTU0119	Penicillium	0	0.105483	jrk11062	Ascomycota	Dothideomycetes	Pleosporales	Pseudoastrosphaeriellaceae	Pseudoastrosphaeriellopsis		wood_saprotroph					wood					filamentous_mycelium							0	unspecified_saprotroph	foliar_endophyte	toxin-producing,animal_parasite_some_species,mycoparasite_some_species	foliar_endophyte	0	soil	mold	partly_aquatic	opportunistic_human_parasite	0	filamentous_mycelium	0	0	0	0	0	0
OTU0120	Umbelopsis	0	0.105483		Ascomycota	Dothideomycetes	Pleosporales	Pseudomassarinaceae	Pseudomassarina		plant_pathogen	litter_saprotroph			leaf/fruit/seed_pathogen	leaf/fruit/seed		non-aquatic			filamentous_mycelium	perithecium_(hymenium_hidden,_narrow_opening)	closed					0	soil_saprotroph	root-associated	0	root-associated	root-associated	roots,soil	mold	non-aquatic	0	0	filamentous_mycelium	none	none	0	0	0	0
OTU0121	Fungi genus Incertae sedis	0.0530817	0		Ascomycota	Dothideomycetes	Pleosporales	Pyrenochaetopsidaceae	Xenopyrenochaetopsis		litter_saprotroph	plant_pathogen			leaf/fruit/seed_pathogen	leaf/fruit/seed		non-aquatic			filamentous_mycelium	perithecium_(hymenium_hidden,_narrow_opening)	closed					#N/A	#N/A	#N/A	#N/A	#N/A	#N/A	#N/A	#N/A	#N/A	#N/A	#N/A	#N/A	#N/A	#N/A	#N/A	#N/A	#N/A	#N/A
OTU0122	Ascosphaera	0	0.102187		Ascomycota	Dothideomycetes	Pleosporales	Roussoellaceae	Pseudoroussoella		wood_saprotroph					wood,leaf/fruit/seed		non-aquatic			filamentous_mycelium	perithecium_(hymenium_hidden,_narrow_opening)	closed					0	animal_parasite	animal_decomposer	0	no_endophytic_capacity	0	animal_material	0	non-aquatic	arthropod_parasite	Apis	filamentous_mycelium	0	0	0	0	0	0
OTU0123	Aspergillus	0	0.100539		Ascomycota	Dothideomycetes	Pleosporales	Roussoellaceae	Setoarthopyrenia		wood_saprotroph					wood		non-aquatic			filamentous_mycelium	perithecium_(hymenium_hidden,_narrow_opening)	closed					0	unspecified_saprotroph	foliar_endophyte	hypervariable,_saprotroph_animal_pathogen_endophyte	foliar_endophyte	0	leaf/fruit/seed,soil,dung,animal_material	mold	partly_aquatic	animal_parasite/opportunistic_human_parasite	0	filamentous_mycelium	0	0	0	0	0	0
OTU0124	Paraconiothyrium	0	0.100539		Ascomycota	Dothideomycetes	Pleosporales	Roussoellaceae	Xenoroussoella		wood_saprotroph					wood		non-aquatic			filamentous_mycelium	perithecium_(hymenium_hidden,_narrow_opening)	closed					0	wood_saprotroph	0	0	no_endophytic_capacity	0	wood	mold	partly_aquatic	0	0	filamentous_mycelium	perithecium_(hymenium_hidden,_narrow_opening)	closed	0	0	0	0
OTU0125	Platygloea	0.0497114	0	jrk11064	Ascomycota	Dothideomycetes	Pleosporales	Striatiguttulaceae	Longicorpus		unspecified_saprotroph									Arecaceae	filamentous_mycelium							0	plant_pathogen	0	0	no_endophytic_capacity	leaf/fruit/seed_pathogen	0	0	non-aquatic	0	0	filamentous_mycelium	none	none	0	0	0	0
OTU0126	Blastobotrys	0.0480263	0	jrk11065	Ascomycota	Dothideomycetes	Pleosporales	Striatiguttulaceae	Striatiguttula		unspecified_saprotroph									Arecaceae	filamentous_mycelium							0	nectar/tap_saprotroph	0	0	0	0	sugar-rich_substrates	0	partly_aquatic	animal-associated	0	yeast	none	none	0	0	0	0
OTU0127	Spizellomyces	0	0.0939462		Ascomycota	Dothideomycetes	Pleosporales	Sulcatisporaceae	Parasulcatispora		wood_saprotroph					wood		non-aquatic			filamentous_mycelium	perithecium_(hymenium_hidden,_narrow_opening)	closed					0	pollen_saprotroph	0	0	0	0	pollen	0	partly_freshwater_(partly_non-aquatic)	0	0	zoosporic-rhizomycelial_(chytrid-like)	zoosporangium	closed	0	0	0	0
OTU0128	Leptobacillium	0	0.0873535	jrk11066	Ascomycota	Dothideomycetes	Pleosporales	Testudinaceae	Halotestudina		wood_saprotroph					wood		partly_aquatic			filamentous_mycelium							0	animal_parasite	fungal_decomposer	0	0	0	animal_material,fungal_material	keratinolytic	0	invertebrate_parasite	0	filamentous_mycelium	0	0	0	0	0	0
OTU0129	Aspergillus	0.0143236	0.0593345		Ascomycota	Dothideomycetes	Pleosporales	Thyridariaceae	Chromolaenomyces		wood_saprotroph					wood		non-aquatic			filamentous_mycelium	perithecium_(hymenium_hidden,_narrow_opening)	closed					0	unspecified_saprotroph	foliar_endophyte	hypervariable,_saprotroph_animal_pathogen_endophyte	foliar_endophyte	0	leaf/fruit/seed,soil,dung,animal_material	mold	partly_aquatic	animal_parasite/opportunistic_human_parasite	0	filamentous_mycelium	0	0	0	0	0	0
OTU0130	Trichocladium	0	0.0857053		Ascomycota	Dothideomycetes	Pleosporales	Thyridariaceae	Pseudothyridariella		wood_saprotroph					wood		non-aquatic			filamentous_mycelium	perithecium_(hymenium_hidden,_narrow_opening)	closed					0	unspecified_saprotroph	0	0	0	0	0	0	partly_aquatic	0	0	filamentous_mycelium	perithecium_(hymenium_hidden,_narrow_opening)	closed	0	0	0	0
OTU0131	Linnemannia	0	0.0857053		Ascomycota	Dothideomycetes	Strigulales	Strigulaceae	Dichoporis		lichenized							non-aquatic			thallus_photosynthetic							#N/A	#N/A	#N/A	#N/A	#N/A	#N/A	#N/A	#N/A	#N/A	#N/A	#N/A	#N/A	#N/A	#N/A	#N/A	#N/A	#N/A	#N/A
OTU0132	Capronia	0.0160088	0.0543899		Ascomycota	Dothideomycetes	Strigulales	Strigulaceae	Phyllocharis		lichenized							non-aquatic			thallus_photosynthetic							0	soil_saprotroph	root_endophyte_dark_septate	mycoparasite_some_species,animal_pathogen_some_species	root_endophyte_dark_septate	0	soil	0	partly_aquatic	animal_parasite/opportunistic_human_parasite	0	dimorphic_yeast	0	0	0	0	0	0
OTU0133	Spizellomycetales genus Incertae sedis	0	0.0857053		Ascomycota	Dothideomycetes	Strigulales	Strigulaceae	Phyllocraterina		lichenized							non-aquatic			thallus_photosynthetic							#N/A	#N/A	#N/A	#N/A	#N/A	#N/A	#N/A	#N/A	#N/A	#N/A	#N/A	#N/A	#N/A	#N/A	#N/A	#N/A	#N/A	#N/A
OTU0134	Umbelopsis	0	0.0857053		Ascomycota	Dothideomycetes	Strigulales	Strigulaceae	Phylloporis		lichenized							non-aquatic			thallus_photosynthetic							0	soil_saprotroph	root-associated	0	root-associated	root-associated	roots,soil	mold	non-aquatic	0	0	filamentous_mycelium	none	none	0	0	0	0
OTU0135	Monascus	0	0.0840572		Ascomycota	Dothideomycetes	Strigulales	Strigulaceae	Puiggariella		lichenized							non-aquatic			thallus_photosynthetic							0	unspecified_saprotroph	0	0	0	0	0	mold	non-aquatic	0	0	filamentous_mycelium	cleistothecium_(closed,_spherical)	closed	0	0	0	0
OTU0136	Penicillium	0	0.082409		Ascomycota	Dothideomycetes	Strigulales	Strigulaceae	Raciborskiella		lichenized							non-aquatic			thallus_photosynthetic							0	unspecified_saprotroph	foliar_endophyte	toxin-producing,animal_parasite_some_species,mycoparasite_some_species	foliar_endophyte	0	soil	mold	partly_aquatic	opportunistic_human_parasite	0	filamentous_mycelium	0	0	0	0	0	0
OTU0137	Leohumicola	0	0.082409		Ascomycota	Dothideomycetes	Strigulales	Strigulaceae	Racoplaca		lichenized							non-aquatic			thallus_photosynthetic							0	soil_saprotroph	ericoid_mycorrhizal	0	root_endophyte_dark_septate	root-associated	soil,roots	0	non-aquatic	0	0	filamentous_mycelium	none	none	0	0	0	0
OTU0138	Mortierella	0	0.0807608		Ascomycota	Dothideomycetes	Strigulales	Strigulaceae	Serusiauxiella		lichenized							non-aquatic			thallus_photosynthetic							0	soil_saprotroph	root-associated	0	root-associated	root-associated	roots,soil	chitinolytic	partly_aquatic	opportunistic_human_parasite	0	filamentous_mycelium	none	none	0	0	0	0
OTU0139	Capronia	0.0404432	0		Ascomycota	Dothideomycetes	Strigulales	Strigulaceae	Swinscowia		lichenized							non-aquatic			thallus_photosynthetic							0	soil_saprotroph	root_endophyte_dark_septate	mycoparasite_some_species,animal_pathogen_some_species	root_endophyte_dark_septate	0	soil	0	partly_aquatic	animal_parasite/opportunistic_human_parasite	0	dimorphic_yeast	0	0	0	0	0	0
OTU0140	Colacogloea	0.0404432	0	jrk11068	Ascomycota	Dothideomycetes	Strigulales	Tenuitholiascaceae	Tenuitholiascus		lichenized							non-aquatic			thallus_photosynthetic	perithecium_(hymenium_hidden,_narrow_opening)	closed			trentepohlioid	Phycopeltis	0	mycoparasite	fungal_decomposer	0	no_endophytic_capacity	0	fungal_material	0	non-aquatic	0	0	dimorphic_yeast	none	none	0	0	0	0
OTU0141		0.0396006	0		Ascomycota	Dothideomycetes	Trypetheliales	Trypetheliaceae	Pseudobogoriella		lichenized	wood_saprotroph	lichenized_loosely			wood		non-aquatic			thallus_photosynthetic	perithecium_(hymenium_hidden,_narrow_opening)	closed					#N/A	#N/A	#N/A	#N/A	#N/A	#N/A	#N/A	#N/A	#N/A	#N/A	#N/A	#N/A	#N/A	#N/A	#N/A	#N/A	#N/A	#N/A
OTU0142	Buckleyzyma	0.0387581	0		Ascomycota	Dothideomycetes	Trypetheliales	Trypetheliaceae	Schummia		lichenized							non-aquatic			thallus_photosynthetic	perithecium_(hymenium_hidden,_narrow_opening)	closed					0	epiphyte	litter_saprotroph	0	no_endophytic_capacity	0	leaf/fruit/seed	0	partly_aquatic	0	0	yeast	none	none	0	0	0	0
OTU0143	Glutinoglossum	0	0.0741681		Ascomycota	Dothideomycetes	Tubeufiales	Tubeufiaceae	Camporesiomyces		wood_saprotroph					wood					filamentous_mycelium							0	soil_saprotroph	unspecified_symbiotroph	CHEGD_symbiotrophs	root-associated	root-associated	roots,soil	0	non-aquatic	0	0	filamentous_mycelium	clavarioid	smooth	0	0	0	0
OTU0144	Penicillium	0	0.0725199	jrk11070	Ascomycota	Dothideomycetes	Tubeufiales	Tubeufiaceae	Kevinhydea		wood_saprotroph					wood		non-aquatic			filamentous_mycelium							0	unspecified_saprotroph	foliar_endophyte	toxin-producing,animal_parasite_some_species,mycoparasite_some_species	foliar_endophyte	0	soil	mold	partly_aquatic	opportunistic_human_parasite	0	filamentous_mycelium	0	0	0	0	0	0
OTU0145	Elixia	0.0362304	0		Ascomycota	Dothideomycetes	Venturiales	Sympoventuriaceae	Bellamyces		wood_saprotroph					wood		non-aquatic			filamentous_mycelium							0	lichenized	0	0	0	0	0	0	non-aquatic	0	0	thallus_photosynthetic	apothecium_(hymenium_on_surface)	smooth	0	0	chlorococcoid	0
OTU0146	Chaetomium	0	0.064279		Ascomycota	Dothideomycetes	Venturiales	Sympoventuriaceae	Fuscohilum		wood_saprotroph					wood		non-aquatic			filamentous_mycelium							0	litter_saprotroph	foliar_endophyte	hypervariable	foliar_endophyte	0	wood,leaf/fruit/seed,soil,dung	soft_rot	partly_aquatic	0	0	filamentous_mycelium	perithecium_(hymenium_hidden,_narrow_opening)	closed	0	0	0	0
OTU0147	Hyaloscyphaceae genus Incertae sedis	0	0.0626308		Ascomycota	Dothideomycetes	Venturiales	Sympoventuriaceae	Helicopsis		wood_saprotroph					wood		non-aquatic			filamentous_mycelium							#N/A	#N/A	#N/A	#N/A	#N/A	#N/A	#N/A	#N/A	#N/A	#N/A	#N/A	#N/A	#N/A	#N/A	#N/A	#N/A	#N/A	#N/A
OTU0148	Infundichalara	0.0320175	0		Ascomycota	Dothideomycetes	Venturiales	Sympoventuriaceae	Neofusicladium		litter_saprotroph					leaf/fruit/seed		non-aquatic			filamentous_mycelium							0	litter_saprotroph	0	0	0	0	leaf/fruit/seed	0	non-aquatic	0	Pinus	filamentous_mycelium	0	0	0	0	0	0
OTU0149	Penicillium	0	0.0626308		Ascomycota	Dothideomycetes	Venturiales	Sympoventuriaceae	Parafusicladium		litter_saprotroph					leaf/fruit/seed		non-aquatic			filamentous_mycelium							0	unspecified_saprotroph	foliar_endophyte	toxin-producing,animal_parasite_some_species,mycoparasite_some_species	foliar_endophyte	0	soil	mold	partly_aquatic	opportunistic_human_parasite	0	filamentous_mycelium	0	0	0	0	0	0
OTU0150	Penicillium	0	0.0593345		Ascomycota	Dothideomycetes	Venturiales	Sympoventuriaceae	Pinaceicola		litter_saprotroph					leaf/fruit/seed		non-aquatic			filamentous_mycelium							0	unspecified_saprotroph	foliar_endophyte	toxin-producing,animal_parasite_some_species,mycoparasite_some_species	foliar_endophyte	0	soil	mold	partly_aquatic	opportunistic_human_parasite	0	filamentous_mycelium	0	0	0	0	0	0
OTU0151	Infundichalara	0.0294898	0		Ascomycota	Dothideomycetes	Venturiales	Sympoventuriaceae	Sterila		litter_saprotroph					leaf/fruit/seed		non-aquatic			filamentous_mycelium							0	litter_saprotroph	0	0	0	0	leaf/fruit/seed	0	non-aquatic	0	Pinus	filamentous_mycelium	0	0	0	0	0	0
OTU0152	Exobasidiaceae genus Incertae sedis	0.0294898	0		Ascomycota	Dothideomycetes	Venturiales	Venturiaceae	Dimerosporiopsis		wood_saprotroph					wood		non-aquatic			filamentous_mycelium							#N/A	#N/A	#N/A	#N/A	#N/A	#N/A	#N/A	#N/A	#N/A	#N/A	#N/A	#N/A	#N/A	#N/A	#N/A	#N/A	#N/A	#N/A
OTU0153	Capnodiales genus Incertae sedis	0.0244344	0.00988908		Ascomycota	Dothideomycetes	Venturiales	Venturiaceae	Fagicola		litter_saprotroph					leaf/fruit/seed		non-aquatic			filamentous_mycelium							#N/A	#N/A	#N/A	#N/A	#N/A	#N/A	#N/A	#N/A	#N/A	#N/A	#N/A	#N/A	#N/A	#N/A	#N/A	#N/A	#N/A	#N/A
OTU0154	Kurtzmanomyces	0.0286473	0		Ascomycota	Dothideomycetes	Venturiales	Venturiaceae	Fraxinicola		litter_saprotroph	foliar_endophyte		foliar_endophyte		leaf/fruit/seed		non-aquatic			filamentous_mycelium	perithecium_(hymenium_hidden,_narrow_opening)	closed					0	unspecified_saprotroph	0	0	0	0	0	0	0	0	0	dimorphic_yeast	0	0	0	0	0	0
OTU0155	Solicoccozyma	0	0.0543899	jrk11071	Ascomycota	Eurotiomycetes	Chaetothyriales	Chaetothyriales family incertae sedis	Laeviomyces		lichen_parasite	fungal_decomposer				fungal_material,algal_material												0	soil_saprotroph	epiphyte	0	0	0	soil	0	partly_aquatic	0	0	yeast	none	none	0	0	0	0
OTU0156	Eurotiomycetes genus Incertae sedis	0.0134811	0.0263709	jrk11072	Ascomycota	Eurotiomycetes	Onygenales	Ajellomycetaceae	Ajellomyces		animal_parasite								animal_parasite/opportunistic_human_parasite		dimorphic_yeast							#N/A	#N/A	#N/A	#N/A	#N/A	#N/A	#N/A	#N/A	#N/A	#N/A	#N/A	#N/A	#N/A	#N/A	#N/A	#N/A	#N/A	#N/A
OTU0157	Mortierella	0	0.0527417		Ascomycota	Eurotiomycetes	Onygenales	Onygenaceae	Emydomyces		animal_parasite	animal_decomposer				animal_material	keratinolytic	partly_aquatic	vertebrate_parasite									0	soil_saprotroph	root-associated	0	root-associated	root-associated	roots,soil	chitinolytic	partly_aquatic	opportunistic_human_parasite	0	filamentous_mycelium	none	none	0	0	0	0
OTU0158	Cyphellophora	0.000842566	0.0510936		Ascomycota	Eurotiomycetes	Sclerococcales	Dactylosporaceae	Pseudosclerococcum		wood_saprotroph					wood		non-aquatic			filamentous_mycelium	apothecium_(hymenium_on_surface)	smooth					0	litter_saprotroph	animal_parasite	0	0	0	leaf/fruit/seed,animal_material	0	non-aquatic	animal_parasite/opportunistic_human_parasite	0	dimorphic_yeast	none	none	0	0	0	0
OTU0159	Lophium	0.0269621	0	jrk11073	Ascomycota	Laboulbeniomycetes	Laboulbeniales	Laboulbeniaceae	Bordea		animal_parasite	animal_decomposer		no_endophytic_capacity		animal_material		non-aquatic	arthropod_parasite		filamentous_mycelium	none	none					0	litter_saprotroph	0	0	0	0	leaf/fruit/seed	0	non-aquatic	0	0	filamentous_mycelium	0	0	0	0	0	0
OTU0160	Epicoccum	0.025277	0.00329636	jrk11074	Ascomycota	Laboulbeniomycetes	Laboulbeniales	Laboulbeniaceae	Thaxterimyces		animal_parasite	animal_decomposer		no_endophytic_capacity		animal_material		non-aquatic	arthropod_parasite		filamentous_mycelium	none	none					0	plant_pathogen	litter_saprotroph	0	foliar_endophyte	leaf/fruit/seed_pathogen	leaf/fruit/seed	0	partly_aquatic	0	0	filamentous_mycelium	0	0	0	0	0	0
OTU0161	GS25_ord_Incertae_sedis genus Incertae sedis	0	0.0527417		Ascomycota	Lecanoromycetes	Caliciales	Caliciaceae	Burrowsia		lichenized							non-aquatic			thallus_photosynthetic	apothecium_(hymenium_on_surface)	smooth			chlorococcoid		#N/A	#N/A	#N/A	#N/A	#N/A	#N/A	#N/A	#N/A	#N/A	#N/A	#N/A	#N/A	#N/A	#N/A	#N/A	#N/A	#N/A	#N/A
OTU0162	Symbiotaphrina	0.0261196	0	jrk11075	Ascomycota	Lecanoromycetes	Graphidales	Graphidaceae	Allographa		lichenized							non-aquatic			thallus_photosynthetic	apothecium_(hymenium_on_surface)	smooth			trentepohlioid		0	animal_endosymbiont	litter_saprotroph	0	0	0	leaf/fruit/seed	0	non-aquatic	animal_endosymbiont	0	yeast	0	0	0	0	0	0
OTU0163		0.0261196	0	jrk11076	Ascomycota	Lecanoromycetes	Graphidales	Graphidaceae	Cryptoschizotrema		lichenized							non-aquatic			thallus_photosynthetic	apothecium_(hymenium_on_surface)	smooth			trentepohlioid		#N/A	#N/A	#N/A	#N/A	#N/A	#N/A	#N/A	#N/A	#N/A	#N/A	#N/A	#N/A	#N/A	#N/A	#N/A	#N/A	#N/A	#N/A
OTU0164	Solicoccozyma	0	0.0510936	jrk11077	Ascomycota	Lecanoromycetes	Lecanorales	Cladoniaceae	Pulchrocladia		lichenized							non-aquatic			thallus_photosynthetic	apothecium_(hymenium_on_surface)	smooth			chlorococcoid		0	soil_saprotroph	epiphyte	0	0	0	soil	0	partly_aquatic	0	0	yeast	none	none	0	0	0	0
OTU0165	Halokirschsteiniothelia	0	0.0494454	jrk11078	Ascomycota	Lecanoromycetes	Lecanorales	Lecanorales family incertae sedis	Myochroidea		lichenized							non-aquatic			thallus_photosynthetic	apothecium_(hymenium_on_surface)	smooth			chlorococcoid		0	wood_saprotroph	0	0	0	0	wood	soft_rot	marine	0	0	filamentous_mycelium	0	0	0	0	0	0
OTU0166	Pisolithus	0	0.0477972	jrk11079	Ascomycota	Lecanoromycetes	Lecanorales	Parmeliaceae	Neoprotoparmelia		lichenized							non-aquatic			thallus_photosynthetic	apothecium_(hymenium_on_surface)	smooth			chlorococcoid		0	ectomycorrhizal	0	0	0	0	0	0	non-aquatic	0	0	filamentous_mycelium	gasteroid	closed	long-distance	/pisolithus-scleroderma	0	0
OTU0167	Simplicillium	0	0.0477972		Ascomycota	Lecanoromycetes	Lecanorales	Ramalinaceae	Namibialina		lichenized							non-aquatic			thallus_photosynthetic	apothecium_(hymenium_on_surface)	smooth			chlorococcoid		0	animal_parasite	animal_decomposer	mycoparasite_some_species	0	0	animal_material	0	non-aquatic	invertebrate_parasite	0	filamentous_mycelium	0	0	0	0	0	0
OTU0168	Leohumicola	0	0.046149		Ascomycota	Lecanoromycetes	Ostropales	Graphidaceae	Jocatoa		lichenized							non-aquatic			thallus_photosynthetic	apothecium_(hymenium_on_surface)	smooth			trentepohlioid		0	soil_saprotroph	ericoid_mycorrhizal	0	root_endophyte_dark_septate	root-associated	soil,roots	0	non-aquatic	0	0	filamentous_mycelium	none	none	0	0	0	0
OTU0169	Herpotrichiellaceae genus Incertae sedis	0	0.046149	jrk11080	Ascomycota	Lecanoromycetes	Ostropales	Stictidaceae	Neofitzroyomyces		plant_pathogen				leaf/fruit/seed_pathogen					Nerium	filamentous_mycelium							#N/A	#N/A	#N/A	#N/A	#N/A	#N/A	#N/A	#N/A	#N/A	#N/A	#N/A	#N/A	#N/A	#N/A	#N/A	#N/A	#N/A	#N/A
OTU0170	Beauveria	0.000842566	0.0445008		Ascomycota	Lecanoromycetes	Ostropales	Stictidaceae	Neostictis		wood_saprotroph					wood		non-aquatic			filamentous_mycelium	perithecium_(hymenium_hidden,_narrow_opening)	closed					0	animal_parasite	animal_decomposer	0	foliar_endophyte	0	animal_material	0	partly_aquatic	invertebrate_parasite	0	filamentous_mycelium	0	0	0	0	0	0
OTU0171	Exophiala	0.0235919	0		Ascomycota	Lecanoromycetes	Peltigerales	Pannariaceae	Atrophysma		lichenized							non-aquatic			thallus_photosynthetic	apothecium_(hymenium_on_surface)	smooth			cyanobacterial		0	animal_parasite	litter_saprotroph	0	root_endophyte_dark_septate	root-associated	leaf/fruit/seed,animal_material	0	partly_aquatic	animal_parasite/opportunistic_human_parasite	0	dimorphic_yeast	0	0	0	0	0	0
OTU0172	Aspergillus	0.0235919	0	jrk11081	Ascomycota	Lecanoromycetes	Teloschistales	Teloschistaceae	Dijigiella		lichenized							non-aquatic			thallus_photosynthetic	apothecium_(hymenium_on_surface)	smooth			chlorococcoid		0	unspecified_saprotroph	foliar_endophyte	hypervariable,_saprotroph_animal_pathogen_endophyte	foliar_endophyte	0	leaf/fruit/seed,soil,dung,animal_material	mold	partly_aquatic	animal_parasite/opportunistic_human_parasite	0	filamentous_mycelium	0	0	0	0	0	0
OTU0173	Robertozyma	0.0227493	0	jrk11082	Ascomycota	Lecanoromycetes	Teloschistales	Teloschistaceae	Hosseusiella		lichenized							non-aquatic			thallus_photosynthetic	apothecium_(hymenium_on_surface)	smooth			chlorococcoid		0	soil_saprotroph	0	0	0	0	soil	0	0	0	0	yeast	none	none	0	0	0	0
OTU0174	Phyllozyma	0.0227493	0	jrk11083	Ascomycota	Lecanoromycetes	Teloschistales	Teloschistaceae	Nevilleiella		lichenized							non-aquatic			thallus_photosynthetic	apothecium_(hymenium_on_surface)	smooth			chlorococcoid		0	epiphyte	litter_saprotroph	0	no_endophytic_capacity	0	leaf/fruit/seed	0	non-aquatic	0	0	yeast	none	none	0	0	0	0
OTU0175	Zalaria	0.0219067	0	jrk11084	Ascomycota	Lecanoromycetes	Teloschistales	Teloschistaceae	Rehmaniella		lichenized							non-aquatic			thallus_photosynthetic	apothecium_(hymenium_on_surface)	smooth			chlorococcoid		0	unspecified_saprotroph	0	0	no_endophytic_capacity	0	0	0	non-aquatic	0	0	yeast	0	0	0	0	0	0
OTU0176	Penicillium	0.0219067	0	jrk11085	Ascomycota	Lecanoromycetes	Teloschistales	Teloschistaceae	Teuvoahtiana		lichenized							non-aquatic			thallus_photosynthetic	apothecium_(hymenium_on_surface)	smooth			chlorococcoid		0	unspecified_saprotroph	foliar_endophyte	toxin-producing,animal_parasite_some_species,mycoparasite_some_species	foliar_endophyte	0	soil	mold	partly_aquatic	opportunistic_human_parasite	0	filamentous_mycelium	0	0	0	0	0	0
OTU0177	Exophiala	0.0219067	0	jrk11086	Ascomycota	Lecanoromycetes	Teloschistales	Teloschistaceae	Upretia		lichenized							non-aquatic			thallus_photosynthetic	apothecium_(hymenium_on_surface)	smooth			chlorococcoid		0	animal_parasite	litter_saprotroph	0	root_endophyte_dark_septate	root-associated	leaf/fruit/seed,animal_material	0	partly_aquatic	animal_parasite/opportunistic_human_parasite	0	dimorphic_yeast	0	0	0	0	0	0
OTU0178	Sagenomella	0.0219067	0		Ascomycota	Lecanoromycetes	Thelocarpales	Thelocarpaceae	Carneothele		lichenized							non-aquatic			thallus_photosynthetic	perithecium_(hymenium_hidden,_narrow_opening)	closed			chlorococcoid		0	unspecified_saprotroph	0	rock-inhabiting_some_species,animal_parasite_some_species	0	0	0	mold	0	opportunistic_human_parasite	0	filamentous_mycelium	0	0	0	0	0	0
OTU0179	Acremonium	0	0.0428527	jrk11087	Ascomycota	Lecanoromycetes	Turquoiseomycetales	Turquoiseomycetaceae	Turquoiseomyces		plant_pathogen				leaf/fruit/seed_pathogen			non-aquatic		Eucalyptus	filamentous_mycelium							0	unspecified_saprotroph	foliar_endophyte	hypervariable	foliar_endophyte	leaf/fruit/seed_pathogen	leaf/fruit/seed,soil,dung,animal_material	soft_rot	partly_aquatic	0	0	filamentous_mycelium	0	0	0	0	0	0
OTU0180		0.0210642	0	jrk11091	Ascomycota	Leotiomycetes	Erysiphales	Erysiphaceae	Oidiopsis		plant_pathogen				leaf/fruit/seed_pathogen			non-aquatic			filamentous_mycelium							#N/A	#N/A	#N/A	#N/A	#N/A	#N/A	#N/A	#N/A	#N/A	#N/A	#N/A	#N/A	#N/A	#N/A	#N/A	#N/A	#N/A	#N/A
OTU0181	Penicillium	0	0.0412045	jrk11092	Ascomycota	Leotiomycetes	Erysiphales	Erysiphaceae	Typhulochaeta		plant_pathogen				leaf/fruit/seed_pathogen			non-aquatic			filamentous_mycelium							0	unspecified_saprotroph	foliar_endophyte	toxin-producing,animal_parasite_some_species,mycoparasite_some_species	foliar_endophyte	0	soil	mold	partly_aquatic	opportunistic_human_parasite	0	filamentous_mycelium	0	0	0	0	0	0
OTU0182	Xenochalara	0.00168513	0.03626	jrk11093	Ascomycota	Leotiomycetes	Helotiales	Arachnopezizaceae	Arachnoscypha		unspecified_saprotroph										filamentous_mycelium							0	litter_saprotroph	0	0	0	0	leaf/fruit/seed	0	non-aquatic	0	0	filamentous_mycelium	0	0	0	0	0	0
OTU0183	Fungi genus Incertae sedis	0	0.0395563		Ascomycota	Leotiomycetes	Helotiales	Chrysodiscaceae	Chrysodisca		wood_saprotroph					wood					filamentous_mycelium	apothecium_(hymenium_on_surface)	smooth					#N/A	#N/A	#N/A	#N/A	#N/A	#N/A	#N/A	#N/A	#N/A	#N/A	#N/A	#N/A	#N/A	#N/A	#N/A	#N/A	#N/A	#N/A
OTU0184	Liangia	0	0.0395563	jrk11088	Ascomycota	Leotiomycetes	Helotiales	Cordieritidaceae	Annabella		wood_saprotroph					wood					filamentous_mycelium							#N/A	#N/A	#N/A	#N/A	#N/A	#N/A	#N/A	#N/A	#N/A	#N/A	#N/A	#N/A	#N/A	#N/A	#N/A	#N/A	#N/A	#N/A
OTU0185		0.019379	0		Ascomycota	Leotiomycetes	Helotiales	Cordieritidaceae	Lawreyella		lichen_parasite	fungal_decomposer				fungal_material,algal_material		non-aquatic			filamentous_mycelium	apothecium_(hymenium_on_surface)	smooth					#N/A	#N/A	#N/A	#N/A	#N/A	#N/A	#N/A	#N/A	#N/A	#N/A	#N/A	#N/A	#N/A	#N/A	#N/A	#N/A	#N/A	#N/A
OTU0186	Niesslia	0	0.0379081	jrk11089	Ascomycota	Leotiomycetes	Helotiales	Cordieritidaceae	Phaeangella		wood_saprotroph					wood					filamentous_mycelium							0	litter_saprotroph	dung_saprotroph	hypervariable	0	0	wood,leaf/fruit/seed,soil,dung	0	0	0	0	filamentous_mycelium	perithecium_(hymenium_hidden,_narrow_opening)	closed	0	0	0	0
OTU0187	Sagenomella	0	0.0379081	jrk11102	Ascomycota	Leotiomycetes	Helotiales	Discinellaceae	Geocoryne	synonym of Discinella	litter_saprotroph					leaf/fruit/seed					filamentous_mycelium							0	unspecified_saprotroph	0	rock-inhabiting_some_species,animal_parasite_some_species	0	0	0	mold	0	opportunistic_human_parasite	0	filamentous_mycelium	0	0	0	0	0	0
OTU0188	Coniosporium	0.0025277	0.0313154	jrk11095	Ascomycota	Leotiomycetes	Helotiales	Helotiaceae	Chaetoscypha		litter_saprotroph					leaf/fruit/seed					filamentous_mycelium							0	plant_pathogen	animal_parasite	0	0	leaf/fruit/seed_pathogen	0	0	partly_aquatic	animal_parasite	0	filamentous_mycelium	0	0	0	0	0	0
OTU0189	Ascomycota genus Incertae sedis	0.0126385	0.0115373	jrk11096	Ascomycota	Leotiomycetes	Helotiales	Helotiaceae	Eubelonis		wood_saprotroph					wood					filamentous_mycelium							#N/A	#N/A	#N/A	#N/A	#N/A	#N/A	#N/A	#N/A	#N/A	#N/A	#N/A	#N/A	#N/A	#N/A	#N/A	#N/A	#N/A	#N/A
OTU0190	Chaenothecopsis	0.0185365	0	jrk11097	Ascomycota	Leotiomycetes	Helotiales	Helotiales family incertae sedis	Arboricolonus		plant_pathogen	wood_saprotroph			wood_pathogen	wood		non-aquatic		Prunus								0	unspecified_saprotroph	0	resin_saprotroph_some_species,lichen_parasite_some_species	0	0	0	0	non-aquatic	0	0	filamentous_mycelium	mazaedium_(pushpin-like)	other	0	0	0	0
OTU0191	Kochiomyces	0	0.0346118	jrk11094	Ascomycota	Leotiomycetes	Helotiales	Helotiales family incertae sedis	Asterocalyx		litter_saprotroph					leaf/fruit/seed												0	pollen_saprotroph	algal_parasite	0	0	algal_parasite	pollen	0	partly_freshwater_(partly_non-aquatic)	0	0	zoosporic-rhizomycelial_(chytrid-like)	zoosporangium	closed	0	0	0	0
OTU0192	Exophiala	0.00421283	0.0263709	jrk11090	Ascomycota	Leotiomycetes	Helotiales	Helotiales family incertae sedis	Brefeldochium	synonym of Polydesmia	wood_saprotroph					wood												0	animal_parasite	litter_saprotroph	0	root_endophyte_dark_septate	root-associated	leaf/fruit/seed,animal_material	0	partly_aquatic	animal_parasite/opportunistic_human_parasite	0	dimorphic_yeast	0	0	0	0	0	0
OTU0193	Penicillium	0	0.0346118		Ascomycota	Leotiomycetes	Helotiales	Helotiales family incertae sedis	Kukwaea		lichen_parasite	fungal_decomposer				fungal_material,algal_material		non-aquatic			filamentous_mycelium	apothecium_(hymenium_on_surface)	smooth					0	unspecified_saprotroph	foliar_endophyte	toxin-producing,animal_parasite_some_species,mycoparasite_some_species	foliar_endophyte	0	soil	mold	partly_aquatic	opportunistic_human_parasite	0	filamentous_mycelium	0	0	0	0	0	0
OTU0194		0.0176939	0	jrk11105	Ascomycota	Leotiomycetes	Helotiales	Helotiales family incertae sedis	Pachydisca		litter_saprotroph					leaf/fruit/seed												#N/A	#N/A	#N/A	#N/A	#N/A	#N/A	#N/A	#N/A	#N/A	#N/A	#N/A	#N/A	#N/A	#N/A	#N/A	#N/A	#N/A	#N/A
OTU0195	Chionosphaera	0.0168513	0	jrk11106	Ascomycota	Leotiomycetes	Helotiales	Helotiales family incertae sedis	Patinellaria		litter_saprotroph					leaf/fruit/seed												0	litter_saprotroph	0	lichen_parasite_two_species	0	0	leaf/fruit/seed	0	0	animal_endosymbiont	0	dimorphic_yeast	other	smooth	0	0	0	0
OTU0196	Clavaria	0	0.0329636	jrk11107	Ascomycota	Leotiomycetes	Helotiales	Helotiales family incertae sedis	Phragmonaevia																			0	soil_saprotroph	unspecified_symbiotroph	CHEGD_symbiotrophs	root-associated	root-associated	roots,soil	0	non-aquatic	0	0	filamentous_mycelium	clavarioid	smooth	0	0	0	0
OTU0197	Dominikia	0	0.0329636	jrk11098	Ascomycota	Leotiomycetes	Helotiales	Hyaloscyphaceae	Gamarada		root_endophyte	soil_saprotroph				soil					filamentous_mycelium							0	arbuscular_mycorrhizal	root-associated	0	root_endophyte	0	0	0	0	0	0	filamentous_mycelium	none	none	0	0	0	0
OTU0198	Meira	0.0160088	0	jrk11104	Ascomycota	Leotiomycetes	Helotiales	Hyaloscyphaceae	Scolecolachnum		plant_pathogen				leaf/fruit/seed_pathogen			non-aquatic		ferns	filamentous_mycelium							0	plant_pathogen	0	0	no_endophytic_capacity	leaf/fruit/seed_pathogen	0	0	non-aquatic	0	0	dimorphic_yeast	none	none	0	0	0	0
OTU0199	Ochrocladosporium	0.0160088	0	jrk11099	Ascomycota	Leotiomycetes	Helotiales	Lachnaceae	Tubolachnum		litter_saprotroph					leaf/fruit/seed					filamentous_mycelium							0	wood_saprotroph	0	0	0	0	wood	0	partly_aquatic	0	0	filamentous_mycelium	0	0	0	0	0	0
OTU0200	Halokirschsteiniothelia	0	0.0296672	jrk11100	Ascomycota	Leotiomycetes	Helotiales	Mollisiaceae	Tapesia		unspecified_saprotroph										filamentous_mycelium							0	wood_saprotroph	0	0	0	0	wood	soft_rot	marine	0	0	filamentous_mycelium	0	0	0	0	0	0
OTU0201	Agaricostilbales genus Incertae sedis	0.0143236	0	jrk11109	Ascomycota	Leotiomycetes	Helotiales	Pezizellaceae	Phialina		unspecified_saprotroph										filamentous_mycelium							#N/A	#N/A	#N/A	#N/A	#N/A	#N/A	#N/A	#N/A	#N/A	#N/A	#N/A	#N/A	#N/A	#N/A	#N/A	#N/A	#N/A	#N/A
OTU0202	Hymenochaetales genus Incertae sedis	0	0.0280191	jrk11101	Ascomycota	Leotiomycetes	Helotiales	Ploettnerulaceae	Ploettnerula		unspecified_saprotroph										filamentous_mycelium							#N/A	#N/A	#N/A	#N/A	#N/A	#N/A	#N/A	#N/A	#N/A	#N/A	#N/A	#N/A	#N/A	#N/A	#N/A	#N/A	#N/A	#N/A
OTU0203		0.0143236	0		Ascomycota	Leotiomycetes	Helotiales	Rutstroemiaceae	Pseudolanzia		litter_saprotroph					leaf/fruit/seed		non-aquatic			filamentous_mycelium	apothecium_(hymenium_on_surface)	smooth					#N/A	#N/A	#N/A	#N/A	#N/A	#N/A	#N/A	#N/A	#N/A	#N/A	#N/A	#N/A	#N/A	#N/A	#N/A	#N/A	#N/A	#N/A
OTU0204	Isaria	0	0.0280191	jrk08321	Ascomycota	Leotiomycetes	Helotiales	Rutstroemiaceae	Staheliella		soil_saprotroph					soil					filamentous_mycelium							0	animal_parasite	animal_decomposer	0	0	0	animal_material	0	non-aquatic	invertebrate_parasite	0	filamentous_mycelium	0	0	0	0	0	0
OTU0205	Cystobasidium	0.0109534	0.00659272	jrk11108	Ascomycota	Leotiomycetes	Helotiales	Sclerotiniaceae	Mycopappus		plant_pathogen				leaf/fruit/seed_pathogen													0	mycoparasite	fungal_decomposer	0	no_endophytic_capacity	0	fungal_material	0	partly_aquatic	0	Thelebolales	dimorphic_yeast	none	none	0	0	0	0
OTU0206	Dominikia	0	0.0280191		Ascomycota	Leotiomycetes	Helotiales	Vibrisseaceae	Srinivasanomyces		wood_saprotroph					wood		non-aquatic			filamentous_mycelium							0	arbuscular_mycorrhizal	root-associated	0	root_endophyte	0	0	0	0	0	0	filamentous_mycelium	none	none	0	0	0	0
OTU0207	Glomeraceae genus Incertae sedis	0	0.0280191	jrk11103	Ascomycota	Leotiomycetes	Leotiales	Tympanidaceae	Aotearoamyces		wood_saprotroph					wood					filamentous_mycelium							#N/A	#N/A	#N/A	#N/A	#N/A	#N/A	#N/A	#N/A	#N/A	#N/A	#N/A	#N/A	#N/A	#N/A	#N/A	#N/A	#N/A	#N/A
OTU0208	Zygorhynchus	0	0.0280191		Ascomycota	Leotiomycetes	Leotiomycetes order incertae sedis	Leotiomycetes family incertae sedis	Blastosporium		plant_pathogen				leaf/fruit/seed_pathogen			non-aquatic		Nicotiana	filamentous_mycelium							0	soil_saprotroph	0	0	0	0	soil	mold	non-aquatic	0	0	filamentous_mycelium	none	none	0	0	0	0
OTU0209	Umbelopsis	0	0.0263709	jrk11110	Ascomycota	Leotiomycetes	Rhytismatales	Rhytismataceae	Heufleria	taxonomy unclear																		0	soil_saprotroph	root-associated	0	root-associated	root-associated	roots,soil	mold	non-aquatic	0	0	filamentous_mycelium	none	none	0	0	0	0
OTU0210	Colacogloea	0.0126385	0	jrk11111	Ascomycota	Leotiomycetes	Rhytismatales	Rhytismataceae	Mycomelanea																			0	mycoparasite	fungal_decomposer	0	no_endophytic_capacity	0	fungal_material	0	non-aquatic	0	0	dimorphic_yeast	none	none	0	0	0	0
OTU0211	Herpotrichiellaceae genus Incertae sedis	0.0126385	0	jrk11112	Ascomycota	Leotiomycetes	Rhytismatales	Rhytismataceae	Triblidiopsis		wood_saprotroph	foliar_endophyte		foliar_endophyte		wood					filamentous_mycelium							#N/A	#N/A	#N/A	#N/A	#N/A	#N/A	#N/A	#N/A	#N/A	#N/A	#N/A	#N/A	#N/A	#N/A	#N/A	#N/A	#N/A	#N/A
OTU0212	Lycoperdon	0	0.0247227	jrk11113	Ascomycota	Leotiomycetes	Thelebolales	Thelebolaceae	Ascophanus		dung_saprotroph					dung,animal_material	keratinolytic				filamentous_mycelium							0	litter_saprotroph	0	0	0	0	leaf/fruit/seed	0	non-aquatic	0	0	filamentous_mycelium	gasteroid	closed	0	0	0	0
OTU0213	Entoloma	0	0.0247227	jrk11114	Ascomycota	Pezizomycetes	Pezizales	Pezizales family incertae sedis	Dennisiopsis		dung_saprotroph					dung					filamentous_mycelium							0	soil_saprotroph	unspecified_symbiotroph	CHEGD_symbiotrophs,ectomycorrhizal_ca_10%_of_species	root-associated	root-associated	roots,soil	0	non-aquatic	0	0	filamentous_mycelium	agaricoid	gills	medium-distance_smooth	/entoloma	0	0
OTU0214	Diaporthe	0	0.0247227		Ascomycota	Pezizomycetes	Pezizales	Pyronemataceae	Geocavicola									non-aquatic			filamentous_mycelium	apothecium_(hymenium_on_surface)	smooth					0	plant_pathogen	litter_saprotroph	0	foliar_endophyte	leaf/fruit/seed_pathogen	leaf/fruit/seed	0	partly_aquatic	0	0	filamentous_mycelium	perithecium_(hymenium_hidden,_narrow_opening)	closed	0	0	0	0
OTU0215	Pseudogymnoascus	0	0.0230745	jrk11115	Ascomycota	Pezizomycetes	Pezizales	Pyronemataceae	Lasiocupulina		soil_saprotroph					soil					filamentous_mycelium							0	soil_saprotroph	0	0	0	0	soil	0	partly_aquatic	opportunistic_animal_parasite_G._destructans	0	filamentous_mycelium	cleistothecium_(closed,_spherical)	closed	0	0	0	0
OTU0216	Mycosphaerellaceae genus Incertae sedis	0	0.0230745		Ascomycota	Pezizomycetes	Pezizales	Pyronemataceae	Pseudocoprotus		dung_saprotroph					dung												#N/A	#N/A	#N/A	#N/A	#N/A	#N/A	#N/A	#N/A	#N/A	#N/A	#N/A	#N/A	#N/A	#N/A	#N/A	#N/A	#N/A	#N/A
OTU0217		0.0117959	0	jrk11116	Ascomycota	Pezizomycotina class incertae sedis	Pezizomycotina order incertae sedis	Pezizomycotina family incertae sedis	Pygmaeosphaera		lichen_parasite	fungal_decomposer				fungal_material,algal_material												#N/A	#N/A	#N/A	#N/A	#N/A	#N/A	#N/A	#N/A	#N/A	#N/A	#N/A	#N/A	#N/A	#N/A	#N/A	#N/A	#N/A	#N/A
OTU0218	Hypocreales genus Incertae sedis	0.0117959	0		Ascomycota	Saccharomycetes	Saccharomycetales	Saccharomycopsidaceae	Ascopersicus		unspecified_saprotroph																	#N/A	#N/A	#N/A	#N/A	#N/A	#N/A	#N/A	#N/A	#N/A	#N/A	#N/A	#N/A	#N/A	#N/A	#N/A	#N/A	#N/A	#N/A
OTU0219	Dactylella	0.0117959	0	jrk11117	Ascomycota	Sordariomycetes	Amphisphaeriales	Sporocadaceae	Diploceras	synonym of Seimatosporium	plant_pathogen				leaf/fruit/seed_pathogen						filamentous_mycelium							0	wood_saprotroph	litter_saprotroph	0	0	0	wood,leaf/fruit/seed,soil,animal_material	0	non-aquatic	0	0	filamentous_mycelium	apothecium_(hymenium_on_surface)	smooth	0	0	0	0
OTU0220	Mortierellales genus Incertae sedis	0.0117959	0	jrk11118	Ascomycota	Sordariomycetes	Amphisphaeriales	Sporocadaceae	Disaeta		plant_pathogen				leaf/fruit/seed_pathogen			non-aquatic		Arbutus	filamentous_mycelium							#N/A	#N/A	#N/A	#N/A	#N/A	#N/A	#N/A	#N/A	#N/A	#N/A	#N/A	#N/A	#N/A	#N/A	#N/A	#N/A	#N/A	#N/A
OTU0221	Bacillicladium	0	0.0230745	jrk11119	Ascomycota	Sordariomycetes	Amphisphaeriales	Sporocadaceae	Distononappendiculata		unspecified_saprotroph										filamentous_mycelium							0	unspecified_saprotroph	rock-inhabiting	0	0	0	soil	0	non-aquatic	0	0	dimorphic_yeast	0	0	0	0	0	0
OTU0222	Capnodiales genus Incertae sedis	0.0025277	0.01813	jrk11120	Ascomycota	Sordariomycetes	Amphisphaeriales	Sporocadaceae	Diversimediispora		soil_saprotroph					soil					filamentous_mycelium							#N/A	#N/A	#N/A	#N/A	#N/A	#N/A	#N/A	#N/A	#N/A	#N/A	#N/A	#N/A	#N/A	#N/A	#N/A	#N/A	#N/A	#N/A
OTU0223	Mortierella	0	0.0230745	jrk11122	Ascomycota	Sordariomycetes	Amphisphaeriales	Sporocadaceae	Nonappendiculata		litter_saprotroph										filamentous_mycelium							0	soil_saprotroph	root-associated	0	root-associated	root-associated	roots,soil	chitinolytic	partly_aquatic	opportunistic_human_parasite	0	filamentous_mycelium	none	none	0	0	0	0
OTU0224	Ilyonectria	0	0.0214263	jrk11123	Ascomycota	Sordariomycetes	Amphisphaeriales	Sporocadaceae	Parabartalinia		litter_saprotroph										filamentous_mycelium							0	plant_pathogen	0	0	0	leaf/fruit/seed_pathogen	0	0	0	0	0	filamentous_mycelium	perithecium_(hymenium_hidden,_narrow_opening)	closed	0	0	0	0
OTU0225	Chaetothyriales genus Incertae sedis	0	0.0214263	jrk11124	Ascomycota	Sordariomycetes	Amphisphaeriales	Sporocadaceae	Pseudosarcostroma											Osyris	filamentous_mycelium							#N/A	#N/A	#N/A	#N/A	#N/A	#N/A	#N/A	#N/A	#N/A	#N/A	#N/A	#N/A	#N/A	#N/A	#N/A	#N/A	#N/A	#N/A
OTU0226	Penicillium	0	0.0214263	jrk11125	Ascomycota	Sordariomycetes	Amphisphaeriales	Sporocadaceae	Xenoseimatosporium		unspecified_saprotroph										filamentous_mycelium							0	unspecified_saprotroph	foliar_endophyte	toxin-producing,animal_parasite_some_species,mycoparasite_some_species	foliar_endophyte	0	soil	mold	partly_aquatic	opportunistic_human_parasite	0	filamentous_mycelium	0	0	0	0	0	0
OTU0227		0.0109534	0	jrk11126	Ascomycota	Sordariomycetes	Cephalothecales	Cephalothecaceae	Victoriomyces		soil_saprotroph					soil					filamentous_mycelium							#N/A	#N/A	#N/A	#N/A	#N/A	#N/A	#N/A	#N/A	#N/A	#N/A	#N/A	#N/A	#N/A	#N/A	#N/A	#N/A	#N/A	#N/A
OTU0228	Dominikia	0	0.0214263	jrk11127	Ascomycota	Sordariomycetes	Chaetosphaeriales	Chaetosphaeriaceae	Miyoshiella		unspecified_saprotroph										filamentous_mycelium							0	arbuscular_mycorrhizal	root-associated	0	root_endophyte	0	0	0	0	0	0	filamentous_mycelium	none	none	0	0	0	0
OTU0229	Chaetothyriales genus Incertae sedis	0.0109534	0	jrk11129	Ascomycota	Sordariomycetes	Chaetosphaeriales	Chaetosphaeriales family incertae sedis	Neonawawia		litter_saprotroph					leaf/fruit/seed		freshwater			filamentous_mycelium							#N/A	#N/A	#N/A	#N/A	#N/A	#N/A	#N/A	#N/A	#N/A	#N/A	#N/A	#N/A	#N/A	#N/A	#N/A	#N/A	#N/A	#N/A
OTU0230	Hypocreales genus Incertae sedis	0	0.0197782	jrk11130	Ascomycota	Sordariomycetes	Coronophorales	Ceratostomataceae	Dactylidispora		soil_saprotroph					soil					filamentous_mycelium							#N/A	#N/A	#N/A	#N/A	#N/A	#N/A	#N/A	#N/A	#N/A	#N/A	#N/A	#N/A	#N/A	#N/A	#N/A	#N/A	#N/A	#N/A
OTU0231	Dominikia	0	0.0197782	jrk11131	Ascomycota	Sordariomycetes	Coronophorales	Ceratostomataceae	Echinusitheca		soil_saprotroph					soil					filamentous_mycelium							0	arbuscular_mycorrhizal	root-associated	0	root_endophyte	0	0	0	0	0	0	filamentous_mycelium	none	none	0	0	0	0
OTU0232	Tritirachiaceae genus Incertae sedis	0	0.0197782	jrk11132	Ascomycota	Sordariomycetes	Coronophorales	Ceratostomataceae	Pseudomicrothecium		litter_saprotroph					leaf/fruit/seed					filamentous_mycelium							#N/A	#N/A	#N/A	#N/A	#N/A	#N/A	#N/A	#N/A	#N/A	#N/A	#N/A	#N/A	#N/A	#N/A	#N/A	#N/A	#N/A	#N/A
OTU0233	Suillus	0	0.0197782	jrk11136	Ascomycota	Sordariomycetes	Diaporthales	Cryphonectriaceae	Myrtonectria		plant_pathogen	wood_saprotroph			wood_pathogen	wood				Syzygium	filamentous_mycelium							0	ectomycorrhizal	0	0	0	0	0	0	non-aquatic	0	Pinaceae	filamentous_mycelium	agaricoid	poroid	long-distance	/suillus-rhizopogon	0	0
OTU0234	Chaetothyriales genus Incertae sedis	0	0.0197782		Ascomycota	Sordariomycetes	Diaporthales	Cryphonectriaceae	Myrtoporthe		plant_pathogen	wood_saprotroph			wood_pathogen	wood				Eucalyptus	filamentous_mycelium	perithecium_(hymenium_hidden,_narrow_opening)	closed					#N/A	#N/A	#N/A	#N/A	#N/A	#N/A	#N/A	#N/A	#N/A	#N/A	#N/A	#N/A	#N/A	#N/A	#N/A	#N/A	#N/A	#N/A
OTU0235	Chaenotheca	0.0101108	0		Ascomycota	Sordariomycetes	Diaporthales	Diaporthales family incertae sedis	Kamalia		plant_pathogen				leaf/fruit/seed_pathogen			non-aquatic		Mallotus	filamentous_mycelium							0	lichenized	0	0	0	0	0	0	non-aquatic	0	0	thallus_photosynthetic	mazaedium_(pushpin-like)	other	0	0	chlorococcoid	trentepohlioid
OTU0236	Umbelopsis	0	0.0197782	jrk11137	Ascomycota	Sordariomycetes	Diaporthales	Gnomoniaceae	Flavignomonia		plant_pathogen	wood_saprotroph			wood_pathogen	wood				Rhus	filamentous_mycelium							0	soil_saprotroph	root-associated	0	root-associated	root-associated	roots,soil	mold	non-aquatic	0	0	filamentous_mycelium	none	none	0	0	0	0
OTU0237	Solicoccozyma	0.0101108	0	jrk11138	Ascomycota	Sordariomycetes	Diaporthales	Melanconiellaceae	Septomelanconiella		wood_saprotroph					wood					filamentous_mycelium							0	soil_saprotroph	epiphyte	0	0	0	soil	0	partly_aquatic	0	0	yeast	none	none	0	0	0	0
OTU0238	Dothideomycetes genus Incertae sedis	0.00926823	0	jrk11139	Ascomycota	Sordariomycetes	Diaporthales	Melanconiellaceae	Sheathospora		plant_pathogen	wood_saprotroph			wood_pathogen	wood				Cornus	filamentous_mycelium							#N/A	#N/A	#N/A	#N/A	#N/A	#N/A	#N/A	#N/A	#N/A	#N/A	#N/A	#N/A	#N/A	#N/A	#N/A	#N/A	#N/A	#N/A
OTU0239	Pseudocosmospora	0	0.01813	jrk11141	Ascomycota	Sordariomycetes	Diaporthales	Phaeoappendicosporaceae	Neophaeoappendicospora		litter_saprotroph					leaf/fruit/seed					filamentous_mycelium							0	mycoparasite	fungal_decomposer	0	0	0	fungal_material	0	0	0	0	filamentous_mycelium	perithecium_(hymenium_hidden,_narrow_opening)	closed	0	0	0	0
OTU0240	Leohumicola	0	0.01813	jrk11142	Ascomycota	Sordariomycetes	Diaporthales	Pseudomelanconidaceae	Neopseudomelanconis		unspecified_saprotroph										filamentous_mycelium							0	soil_saprotroph	ericoid_mycorrhizal	0	root_endophyte_dark_septate	root-associated	soil,roots	0	non-aquatic	0	0	filamentous_mycelium	none	none	0	0	0	0
OTU0241	Xenochalara	0	0.01813	jrk11143	Ascomycota	Sordariomycetes	Diaporthomycetidae order incertae sedis	Diaporthomycetidae family incertae sedis	Aquimonospora		wood_saprotroph					wood		freshwater			filamentous_mycelium							0	litter_saprotroph	0	0	0	0	leaf/fruit/seed	0	non-aquatic	0	0	filamentous_mycelium	0	0	0	0	0	0
OTU0242	Waltergamsia	0	0.01813	jrk11144	Ascomycota	Sordariomycetes	Diaporthomycetidae order incertae sedis	Diaporthomycetidae family incertae sedis	Proliferophorum		wood_saprotroph					wood		freshwater			filamentous_mycelium							#N/A	#N/A	#N/A	#N/A	#N/A	#N/A	#N/A	#N/A	#N/A	#N/A	#N/A	#N/A	#N/A	#N/A	#N/A	#N/A	#N/A	#N/A
OTU0243	Saccharomycetales genus Incertae sedis	0.00926823	0	jrk11145	Ascomycota	Sordariomycetes	Glomerellales	Plectosphaerellaceae	Brunneochlamydosporium		soil_saprotroph					soil					filamentous_mycelium							#N/A	#N/A	#N/A	#N/A	#N/A	#N/A	#N/A	#N/A	#N/A	#N/A	#N/A	#N/A	#N/A	#N/A	#N/A	#N/A	#N/A	#N/A
OTU0244	Thanatephorus	0	0.01813	jrk11146	Ascomycota	Sordariomycetes	Glomerellales	Plectosphaerellaceae	Brunneomyces		litter_saprotroph					leaf/fruit/seed					filamentous_mycelium							0	plant_pathogen	litter_saprotroph	0	0	leaf/fruit/seed_pathogen	leaf/fruit/seed	0	0	0	0	filamentous_mycelium	corticioid	smooth	0	0	0	0
OTU0245	Microsporomyces	0.00926823	0	jrk11147	Ascomycota	Sordariomycetes	Glomerellales	Plectosphaerellaceae	Chlamydosporiella		unspecified_saprotroph										filamentous_mycelium							0	epiphyte	litter_saprotroph	0	no_endophytic_capacity	0	leaf/fruit/seed	0	non-aquatic	0	0	yeast	none	none	0	0	0	0
OTU0246	Lecanicillium	0	0.01813	jrk11148	Ascomycota	Sordariomycetes	Glomerellales	Plectosphaerellaceae	Furcasterigmium		soil_saprotroph					soil					filamentous_mycelium							0	animal_parasite	animal_decomposer	0	foliar_endophyte	0	animal_material	0	partly_aquatic	invertebrate_parasite	0	filamentous_mycelium	0	0	0	0	0	0
OTU0247	Capronia	0	0.0164818	jrk11149	Ascomycota	Sordariomycetes	Glomerellales	Plectosphaerellaceae	Fuscohypha		soil_saprotroph					soil					filamentous_mycelium							0	soil_saprotroph	root_endophyte_dark_septate	mycoparasite_some_species,animal_pathogen_some_species	root_endophyte_dark_septate	0	soil	0	partly_aquatic	animal_parasite/opportunistic_human_parasite	0	dimorphic_yeast	0	0	0	0	0	0
OTU0248	Polyphilus	0	0.0164818	jrk11150	Ascomycota	Sordariomycetes	Glomerellales	Plectosphaerellaceae	Musidium		plant_pathogen	root-associated		root-associated	root_pathogen	roots				Musa	filamentous_mycelium							0	unspecified_saprotroph	root_endophyte_dark_septate	hypervariable	root_endophyte_dark_septate	other_plant_pathogen	leaf/fruit/seed,soil,dung,animal_material	0	non-aquatic	0	0	filamentous_mycelium	none	none	0	0	0	0
OTU0249	Geminibasidium	0	0.0164818	jrk11151	Ascomycota	Sordariomycetes	Glomerellales	Plectosphaerellaceae	Nigrocephalum		animal_parasite								animal_parasite/opportunistic_human_parasite		filamentous_mycelium							0	soil_saprotroph	0	extremophile_xerophile_and_heat_resistant	0	0	soil	0	non-aquatic	0	0	filamentous_mycelium	none	none	0	0	0	0
OTU0250	Filobasidium	0.00842566	0	jrk11152	Ascomycota	Sordariomycetes	Glomerellales	Plectosphaerellaceae	Paragibellulopsis		litter_saprotroph					leaf/fruit/seed					filamentous_mycelium							0	unspecified_saprotroph	0	0	0	0	0	0	partly_aquatic	opportunistic_human_parasite	0	dimorphic_yeast	none	none	0	0	0	0
OTU0251	Neosartorya	0	0.0164818	jrk11153	Ascomycota	Sordariomycetes	Glomerellales	Plectosphaerellaceae	Paramusicillium		soil_saprotroph					soil					filamentous_mycelium							0	unspecified_saprotroph	0	0	0	0	0	mold	non-aquatic	opportunistic_human_parasite	0	filamentous_mycelium	0	0	0	0	0	0
OTU0252	Tremellales genus Incertae sedis	0.00842566	0	jrk11154	Ascomycota	Sordariomycetes	Glomerellales	Plectosphaerellaceae	Phialoparvum		soil_saprotroph					soil					filamentous_mycelium							#N/A	#N/A	#N/A	#N/A	#N/A	#N/A	#N/A	#N/A	#N/A	#N/A	#N/A	#N/A	#N/A	#N/A	#N/A	#N/A	#N/A	#N/A
OTU0253		0.00842566	0	jrk11155	Ascomycota	Sordariomycetes	Glomerellales	Plectosphaerellaceae	Sayamraella		soil_saprotroph					soil					filamentous_mycelium							#N/A	#N/A	#N/A	#N/A	#N/A	#N/A	#N/A	#N/A	#N/A	#N/A	#N/A	#N/A	#N/A	#N/A	#N/A	#N/A	#N/A	#N/A
OTU0254	Ascomycota genus Incertae sedis	0.00842566	0	jrk11156	Ascomycota	Sordariomycetes	Glomerellales	Plectosphaerellaceae	Summerbellia		soil_saprotroph					soil					filamentous_mycelium							#N/A	#N/A	#N/A	#N/A	#N/A	#N/A	#N/A	#N/A	#N/A	#N/A	#N/A	#N/A	#N/A	#N/A	#N/A	#N/A	#N/A	#N/A
OTU0255	Candolleomyces	0	0.0164818	jrk11157	Ascomycota	Sordariomycetes	Glomerellales	Plectosphaerellaceae	Theobromium											Theobroma	filamentous_mycelium							#N/A	#N/A	#N/A	#N/A	#N/A	#N/A	#N/A	#N/A	#N/A	#N/A	#N/A	#N/A	#N/A	#N/A	#N/A	#N/A	#N/A	#N/A
OTU0256		0.0075831	0	jrk11158	Ascomycota	Sordariomycetes	Hypocreales	Bionectriaceae	Chrysonectria		wood_saprotroph					wood					filamentous_mycelium	perithecium_(hymenium_hidden,_narrow_opening)	closed					#N/A	#N/A	#N/A	#N/A	#N/A	#N/A	#N/A	#N/A	#N/A	#N/A	#N/A	#N/A	#N/A	#N/A	#N/A	#N/A	#N/A	#N/A
OTU0257	Colacogloea	0.0075831	0		Ascomycota	Sordariomycetes	Hypocreales	Bionectriaceae	Pilonectria																			0	mycoparasite	fungal_decomposer	0	no_endophytic_capacity	0	fungal_material	0	non-aquatic	0	0	dimorphic_yeast	none	none	0	0	0	0
OTU0258	Scedosporium	0	0.0148336	jrk11159	Ascomycota	Sordariomycetes	Hypocreales	Clavicipitaceae	Helicocollum		animal_parasite								arthropod_parasite	scale_insects	filamentous_mycelium							0	soil_saprotroph	animal_parasite	0	0	0	soil,animal_material	0	non-aquatic	opportunistic_human_parasite	0	filamentous_mycelium	cleistothecium_(closed,_spherical)	closed	0	0	0	0
OTU0259	Saitozyma	0	0.0148336	jrk11160	Ascomycota	Sordariomycetes	Hypocreales	Clavicipitaceae	Nigelia		animal_parasite								arthropod_parasite		filamentous_mycelium							0	soil_saprotroph	0	0	0	0	soil	0	partly_aquatic	0	0	yeast	none	none	0	0	0	0
OTU0260	Scolecobasidium	0.0075831	0	jrk11161	Ascomycota	Sordariomycetes	Hypocreales	Clavicipitaceae	Romanoa		soil_saprotroph					soil					filamentous_mycelium							0	animal_parasite	plant_pathogen	0	foliar_endophyte	leaf/fruit/seed_pathogen	leaf/fruit/seed,animal_material	0	partly_aquatic	animal_parasite	0	filamentous_mycelium	perithecium_(hymenium_hidden,_narrow_opening)	closed	0	0	0	0
OTU0261	Blastobotrys	0.0075831	0		Ascomycota	Sordariomycetes	Hypocreales	Cordycipitaceae	Neobaryopsis		lichen_parasite	fungal_decomposer				fungal_material,algal_material		non-aquatic			filamentous_mycelium	perithecium_(hymenium_hidden,_narrow_opening)	closed					0	nectar/tap_saprotroph	0	0	0	0	sugar-rich_substrates	0	partly_aquatic	animal-associated	0	yeast	none	none	0	0	0	0
OTU0262	Meyerozyma	0.00337027	0.0082409	jrk11162	Ascomycota	Sordariomycetes	Hypocreales	Hypocreaceae	Kiflimonium		soil_saprotroph					soil					filamentous_mycelium							0	epiphyte	nectar/tap_saprotroph	0	foliar_endophyte	0	leaf/fruit/seed,sugar-rich_substrates	0	partly_aquatic	arthropod-associated	0	yeast	none	none	0	0	0	0
OTU0263	Rhizopogon	0	0.0148336	jrk11163	Ascomycota	Sordariomycetes	Hypocreales	Hypocreaceae	Stephanoma	synonym of Hypomyces	mycoparasite	fungal_decomposer				fungal_material					filamentous_mycelium							0	ectomycorrhizal	0	0	0	0	0	0	non-aquatic	0	Pinaceae	filamentous_mycelium	gasteroid	closed	long-distance	/suillus-rhizopogon	0	0
OTU0264	Dothideomycetes genus Incertae sedis	0.00337027	0.0082409	jrk11165	Ascomycota	Sordariomycetes	Hypocreales	Nectriaceae	Murinectria		unspecified_saprotroph										filamentous_mycelium							#N/A	#N/A	#N/A	#N/A	#N/A	#N/A	#N/A	#N/A	#N/A	#N/A	#N/A	#N/A	#N/A	#N/A	#N/A	#N/A	#N/A	#N/A
OTU0265	Fungi genus Incertae sedis	0	0.0148336	jrk11166	Ascomycota	Sordariomycetes	Hypocreales	Niessliaceae	Neoeucasphaeria									non-aquatic		Eucalyptus	filamentous_mycelium							#N/A	#N/A	#N/A	#N/A	#N/A	#N/A	#N/A	#N/A	#N/A	#N/A	#N/A	#N/A	#N/A	#N/A	#N/A	#N/A	#N/A	#N/A
OTU0266	Eucasphaeria	0	0.0148336	jrk11167	Ascomycota	Sordariomycetes	Hypocreales	Sarocladiaceae	Parasarocladium									partly_aquatic			filamentous_mycelium							0	plant_pathogen	litter_saprotroph	0	0	leaf/fruit/seed_pathogen	leaf/fruit/seed	0	0	0	0	filamentous_mycelium	perithecium_(hymenium_hidden,_narrow_opening)	closed	0	0	0	0
OTU0267	Basidiomycota genus Incertae sedis	0.00674053	0	jrk11168	Ascomycota	Sordariomycetes	Hypocreales	Stachybotryaceae	Hyalinostachys		wood_saprotroph					wood					filamentous_mycelium							#N/A	#N/A	#N/A	#N/A	#N/A	#N/A	#N/A	#N/A	#N/A	#N/A	#N/A	#N/A	#N/A	#N/A	#N/A	#N/A	#N/A	#N/A
OTU0268	Elixia	0.00674053	0	jrk11169	Ascomycota	Sordariomycetes	Magnaporthales	Magnaporthaceae	Bifusisporella		foliar_endophyte	foliar_endophyte		foliar_endophyte							filamentous_mycelium							0	lichenized	0	0	0	0	0	0	non-aquatic	0	0	thallus_photosynthetic	apothecium_(hymenium_on_surface)	smooth	0	0	chlorococcoid	0
OTU0269	Dothideomycetes genus Incertae sedis	0	0.0131854	jrk11170	Ascomycota	Sordariomycetes	Meliolales	Meliolaceae	Setameliola		plant_pathogen	epiphyte			leaf/fruit/seed_pathogen	leaf/fruit/seed		non-aquatic			filamentous_mycelium	perithecium_(hymenium_hidden,_narrow_opening)	closed					#N/A	#N/A	#N/A	#N/A	#N/A	#N/A	#N/A	#N/A	#N/A	#N/A	#N/A	#N/A	#N/A	#N/A	#N/A	#N/A	#N/A	#N/A
OTU0270	Arthroderma	0	0.0131854	jrk11171	Ascomycota	Sordariomycetes	Microascales	Halosphaeriaceae	Amphitrite		wood_saprotroph					wood		marine			filamentous_mycelium	perithecium_(hymenium_hidden,_narrow_opening)	closed					0	animal_parasite	animal_decomposer	0	0	0	animal_material	0	non-aquatic	animal_parasite/opportunistic_human_parasite	0	filamentous_mycelium	cleistothecium_(closed,_spherical)	closed	0	0	0	0
OTU0271	Helicoma	0.00674053	0	jrk11172	Ascomycota	Sordariomycetes	Microascales	Halosphaeriaceae	Aniptosporopsis		wood_saprotroph					wood		aquatic			filamentous_mycelium	perithecium_(hymenium_hidden,_narrow_opening)	closed					0	wood_saprotroph	0	0	no_endophytic_capacity	0	wood	0	non-aquatic	0	0	filamentous_mycelium	perithecium_(hymenium_hidden,_narrow_opening)	closed	0	0	0	0
OTU0272	Hormiactis	0	0.0131854	jrk11173	Ascomycota	Sordariomycetes	Microascales	Halosphaeriaceae	Lautisporopsis	Nom. invalid.	wood_saprotroph					wood		marine			filamentous_mycelium	perithecium_(hymenium_hidden,_narrow_opening)	closed					0	mycoparasite	fungal_decomposer	0	0	0	fungal_material	0	0	0	0	filamentous_mycelium	0	0	0	0	0	0
OTU0273	Chaetothyriales genus Incertae sedis	0.00674053	0	jrk11174	Ascomycota	Sordariomycetes	Microascales	Halosphaeriaceae	Paraaniptodera		wood_saprotroph					wood		marine			filamentous_mycelium	perithecium_(hymenium_hidden,_narrow_opening)	closed					#N/A	#N/A	#N/A	#N/A	#N/A	#N/A	#N/A	#N/A	#N/A	#N/A	#N/A	#N/A	#N/A	#N/A	#N/A	#N/A	#N/A	#N/A
OTU0274	Elixia	0.00674053	0	jrk11175	Ascomycota	Sordariomycetes	Microascales	Microascaceae	Fairmania		wood_saprotroph					wood		non-aquatic			filamentous_mycelium	perithecium_(hymenium_hidden,_narrow_opening)	closed					0	lichenized	0	0	0	0	0	0	non-aquatic	0	0	thallus_photosynthetic	apothecium_(hymenium_on_surface)	smooth	0	0	chlorococcoid	0
OTU0275	Malassezia	0	0.0131854	jrk11176	Ascomycota	Sordariomycetes	Microascales	Triadelphiaceae	Synnematotriadelphia		litter_saprotroph					leaf/fruit/seed		non-aquatic			filamentous_mycelium	none	none					0	soil_saprotroph	root-associated	0	root-associated	root-associated	roots,soil	0	partly_aquatic	animal-associated/opportunistic_human_parasite	0	yeast	none	none	0	0	0	0
OTU0276	Apodus	0	0.0131854	jrk11179	Ascomycota	Sordariomycetes	Ophiostomatales	Ophiostomataceae	Afroraffaelea		plant_pathogen	arthropod-associated			wood_pathogen			non-aquatic	arthropod-associated		filamentous_mycelium							0	dung_saprotroph	0	0	0	0	dung	0	non-aquatic	0	0	filamentous_mycelium	perithecium_(hymenium_hidden,_narrow_opening)	closed	0	0	0	0
OTU0277	Helotiales genus Incertae sedis	0	0.0131854		Ascomycota	Sordariomycetes	Pleurotheciales	Pleurotheciaceae	Neomonodictys		wood_saprotroph					wood		freshwater			filamentous_mycelium	none	none					#N/A	#N/A	#N/A	#N/A	#N/A	#N/A	#N/A	#N/A	#N/A	#N/A	#N/A	#N/A	#N/A	#N/A	#N/A	#N/A	#N/A	#N/A
OTU0278	Humicola	0	0.0115373	jrk11180	Ascomycota	Sordariomycetes	Sordariales	Chaetomiaceae	Allobotryotrichum		plant_pathogen				leaf/fruit/seed_pathogen			non-aquatic		Saccharum	filamentous_mycelium							0	wood_saprotroph	0	0	0	0	wood	soft_rot	non-aquatic	0	0	filamentous_mycelium	none	none	0	0	0	0
OTU0279	Cystobasidium	0.00337027	0.00494454	jrk11181	Ascomycota	Sordariomycetes	Sordariales	Lasiosphaeriaceae	Episternus		animal_parasite							non-aquatic	arthropod_parasite	Onthophagus	filamentous_mycelium							0	mycoparasite	fungal_decomposer	0	no_endophytic_capacity	0	fungal_material	0	partly_aquatic	0	Thelebolales	dimorphic_yeast	none	none	0	0	0	0
OTU0280	Acremonium	0	0.0115373	jrk11182	Ascomycota	Sordariomycetes	Sordariomycetes order incertae sedis	Sordariomycetes family incertae sedis	Guarroa		wood_saprotroph					wood		non-aquatic			filamentous_mycelium							0	unspecified_saprotroph	foliar_endophyte	hypervariable	foliar_endophyte	leaf/fruit/seed_pathogen	leaf/fruit/seed,soil,dung,animal_material	soft_rot	partly_aquatic	0	0	filamentous_mycelium	0	0	0	0	0	0
OTU0281	Sarea	0.00589797	0		Ascomycota	Sordariomycetes	Sordariomycetes order incertae sedis	Sordariomycetes family incertae sedis	Phaeobotrys	Nom. illegit.	wood_saprotroph					wood		non-aquatic			filamentous_mycelium							0	unspecified_saprotroph	0	0	0	0	0	0	0	0	0	filamentous_mycelium	apothecium_(hymenium_on_surface)	smooth	0	0	0	0
OTU0282	Kurtzmanomyces	0.00589797	0	jrk11183	Ascomycota	Sordariomycetes	Torpedosporales	Juncigenaceae	Elbamycella		plant_pathogen	litter_saprotroph			leaf/fruit/seed_pathogen	leaf/fruit/seed		marine		seagrasses	filamentous_mycelium							0	unspecified_saprotroph	0	0	0	0	0	0	0	0	0	dimorphic_yeast	0	0	0	0	0	0
OTU0283	Trichosporon	0.00589797	0	jrk11184	Ascomycota	Sordariomycetes	Xenospadicoidales	Xenospadicoidaceae	Neospadicoides		wood_saprotroph	litter_saprotroph				wood,leaf/fruit/seed		freshwater			filamentous_mycelium							0	animal_parasite	animal_decomposer	0	0	0	animal_material	0	non-aquatic	animal_parasite/opportunistic_human_parasite	0	yeast	none	none	0	0	0	0
OTU0284	Dominikia	0	0.0115373		Ascomycota	Sordariomycetes	Xylariales	Diatrypaceae	Allodiatrype		litter_saprotroph					leaf/fruit/seed		non-aquatic			filamentous_mycelium							0	arbuscular_mycorrhizal	root-associated	0	root_endophyte	0	0	0	0	0	0	filamentous_mycelium	none	none	0	0	0	0
OTU0285	Infundichalara	0.00589797	0	jrk11186	Ascomycota	Sordariomycetes	Xylariales	Diatrypaceae	Halocryptovalsa		wood_saprotroph					wood		marine			filamentous_mycelium							0	litter_saprotroph	0	0	0	0	leaf/fruit/seed	0	non-aquatic	0	Pinus	filamentous_mycelium	0	0	0	0	0	0
OTU0286	Spizellomycetales genus Incertae sedis	0	0.0115373	jrk11187	Ascomycota	Sordariomycetes	Xylariales	Diatrypaceae	Neoeutypella		wood_saprotroph					wood				Pinus	filamentous_mycelium							#N/A	#N/A	#N/A	#N/A	#N/A	#N/A	#N/A	#N/A	#N/A	#N/A	#N/A	#N/A	#N/A	#N/A	#N/A	#N/A	#N/A	#N/A
OTU0287	Knufia	0	0.0115373	jrk11188	Ascomycota	Sordariomycetes	Xylariales	Hypoxylaceae	Natonodosa		litter_saprotroph					leaf/fruit/seed		partly_freshwater_(partly_non-aquatic)			filamentous_mycelium							0	soil_saprotroph	rock-inhabiting	0	0	leaf/fruit/seed_pathogen	leaf/fruit/seed,soil,animal_material	0	partly_aquatic	opportunistic_animal_parasite	0	dimorphic_yeast	0	0	0	0	0	0
OTU0288	Aureobasidium	0.0050554	0.00164818		Ascomycota	Sordariomycetes	Xylariales	Xylariales family incertae sedis	Xenoanthostomella		litter_saprotroph					leaf/fruit/seed					filamentous_mycelium							0	sooty_mold	litter_saprotroph	hyperviariable	foliar_endophyte	leaf/fruit/seed_pathogen	leaf/fruit/seed,roots,animal_material,sugar-rich_substrates	0	partly_aquatic	animal_parasite	0	dimorphic_yeast	0	0	0	0	0	0
OTU0289	Platygloea	0.0050554	0	jrk11189	Ascomycota	Sordariomycetes	Xylariomycetidae order incertae sedis	Cainiaceae	Alishanica		litter_saprotroph					leaf/fruit/seed				Miscanthus	filamentous_mycelium							0	plant_pathogen	0	0	no_endophytic_capacity	leaf/fruit/seed_pathogen	0	0	non-aquatic	0	0	filamentous_mycelium	none	none	0	0	0	0
OTU0290	Skoua	0	0.00988908	jrk11190	Ascomycota	Taphrinomycetes	Taphrinales	Protomycetaceae	Buerenia	synonym of Burenia	plant_pathogen				leaf/fruit/seed_pathogen			non-aquatic		Myrrhidendron	dimorphic_yeast							0	pollen_saprotroph	animal-associated	0	0	0	pollen	0	non-aquatic	arthropod-associated	Apis	filamentous_mycelium	0	0	0	0	0	0
OTU0291	Robertozyma	0.0050554	0	jrk11192	Basidiomycota	Agaricomycetes	Agaricales	Agaricales family incertae sedis	Lignomphalia		wood_saprotroph					wood		non-aquatic			filamentous_mycelium	agaricoid	gills					0	soil_saprotroph	0	0	0	0	soil	0	0	0	0	yeast	none	none	0	0	0	0
OTU0292	Neocatenulostroma	0.0050554	0	jrk11193	Basidiomycota	Agaricomycetes	Agaricales	Agaricales family incertae sedis	Vanromburghia		wood_saprotroph					wood		non-aquatic			filamentous_mycelium	agaricoid	smooth					0	plant_pathogen	litter_saprotroph	0	0	leaf/fruit/seed_pathogen	leaf/fruit/seed	0	non-aquatic	0	0	filamentous_mycelium	perithecium_(hymenium_hidden,_narrow_opening)	closed	0	0	0	0
OTU0293	Linnemannia	0	0.00988908	jrk11194	Basidiomycota	Agaricomycetes	Agaricales	Amanitaceae	Limacellopsis		soil_saprotroph					soil		non-aquatic			filamentous_mycelium	agaricoid	gills					#N/A	#N/A	#N/A	#N/A	#N/A	#N/A	#N/A	#N/A	#N/A	#N/A	#N/A	#N/A	#N/A	#N/A	#N/A	#N/A	#N/A	#N/A
OTU0294	Syzygospora	0.0050554	0	jrk11195	Basidiomycota	Agaricomycetes	Agaricales	Amanitaceae	Zhuliangomyces		soil_saprotroph					soil		non-aquatic			filamentous_mycelium	agaricoid	gills					0	mycoparasite	0	lichen_parasite_some_species	0	0	fungal_material	0	non-aquatic	0	0	dimorphic_yeast	0	0	0	0	0	0
OTU0295	Rhizophagus	0	0.00988908	jrk11196	Basidiomycota	Agaricomycetes	Agaricales	Callistosporiaceae	Anupama		litter_saprotroph					leaf/fruit/seed		non-aquatic			filamentous_mycelium	agaricoid	gills					0	arbuscular_mycorrhizal	root-associated	0	root_endophyte	0	0	0	0	0	0	filamentous_mycelium	none	none	0	0	0	0
OTU0296	Hypholoma	0	0.00988908	jrk11197	Basidiomycota	Agaricomycetes	Agaricales	Cystostereaceae	Rigidotubus		wood_saprotroph					wood	white_rot	non-aquatic			filamentous_mycelium	corticioid	poroid					0	wood_saprotroph	0	0	0	0	wood	white_rot	non-aquatic	0	0	filamentous_mycelium	agaricoid	gills	0	0	0	0
OTU0297	Verrucaria	0	0.00988908	jrk11198	Basidiomycota	Agaricomycetes	Agaricales	Hygrophoraceae	Sinohygrocybe		litter_saprotroph	soil_saprotroph				leaf/fruit/seed		non-aquatic			filamentous_mycelium	agaricoid	gills					0	lichenized	0	0	0	0	0	0	partly_aquatic	0	0	thallus_photosynthetic	0	0	0	0	chlorococcoid	0
OTU0298	Agaricostilbales genus Incertae sedis	0.0050554	0		Basidiomycota	Agaricomycetes	Agaricales	Omphalotaceae	Paragymnopus		wood_saprotroph	litter_saprotroph				wood,leaf/fruit/seed		non-aquatic			filamentous_mycelium	agaricoid	gills					#N/A	#N/A	#N/A	#N/A	#N/A	#N/A	#N/A	#N/A	#N/A	#N/A	#N/A	#N/A	#N/A	#N/A	#N/A	#N/A	#N/A	#N/A
OTU0299	Rhinocladiella	0	0.00988908	jrk11199	Basidiomycota	Agaricomycetes	Agaricales	Omphalotaceae	Pusillomyces		wood_saprotroph	litter_saprotroph				wood,leaf/fruit/seed		non-aquatic			filamentous_mycelium	agaricoid	smooth					0	soil_saprotroph	animal_parasite	0	root_endophyte_dark_septate	root-associated	soil,animal_material	0	partly_freshwater_(partly_non-aquatic)	animal_parasite/opportunistic_human_parasite	0	dimorphic_yeast	0	0	0	0	0	0
OTU0300	Hamamotoa	0.0050554	0		Basidiomycota	Agaricomycetes	Agaricales	Porotheleaceae	Chrysomycena		wood_saprotroph					wood		non-aquatic			filamentous_mycelium	agaricoid	gills					0	soil_saprotroph	0	0	0	0	soil	0	0	0	0	yeast	none	none	0	0	0	0
OTU0301	Papiliotrema	0.0050554	0	jrk11191	Basidiomycota	Agaricomycetes	Agaricales	Porotheleaceae	Leucoinocybe		wood_saprotroph					wood		non-aquatic			filamentous_mycelium	agaricoid	gills					0	mycoparasite	fungal_decomposer	0	0	0	fungal_material	0	partly_aquatic	0	0	dimorphic_yeast	0	0	0	0	0	0
OTU0302	Infundichalara	0.0050554	0		Basidiomycota	Agaricomycetes	Agaricales	Porotheleaceae	Pulverulina		wood_saprotroph					wood		non-aquatic			filamentous_mycelium	agaricoid	gills					0	litter_saprotroph	0	0	0	0	leaf/fruit/seed	0	non-aquatic	0	Pinus	filamentous_mycelium	0	0	0	0	0	0
OTU0303	Capnodiales genus Incertae sedis	0	0.00988908	jrk11200	Basidiomycota	Agaricomycetes	Agaricales	Tubariaceae	Pleuromyces		wood_saprotroph					wood		non-aquatic		Fagus	filamentous_mycelium	agaricoid	gills					#N/A	#N/A	#N/A	#N/A	#N/A	#N/A	#N/A	#N/A	#N/A	#N/A	#N/A	#N/A	#N/A	#N/A	#N/A	#N/A	#N/A	#N/A
OTU0304	Cystobasidium	0.0050554	0		Basidiomycota	Agaricomycetes	Agaricales	Callistosporiaceae	Xerophorus		litter_saprotroph	soil_saprotroph				leaf/fruit/seed		non-aquatic			filamentous_mycelium	agaricoid	gills					0	mycoparasite	fungal_decomposer	0	no_endophytic_capacity	0	fungal_material	0	partly_aquatic	0	Thelebolales	dimorphic_yeast	none	none	0	0	0	0
OTU0305	Eurotiomycetes genus Incertae sedis	0.0050554	0	jrk11201	Basidiomycota	Agaricomycetes	Auriculariales	Auriculariales family incertae sedis	Gelacantha		wood_saprotroph					wood		non-aquatic			filamentous_mycelium	tremelloid	smooth					#N/A	#N/A	#N/A	#N/A	#N/A	#N/A	#N/A	#N/A	#N/A	#N/A	#N/A	#N/A	#N/A	#N/A	#N/A	#N/A	#N/A	#N/A
OTU0306	Ascotricha	0	0.00988908	jrk11202	Basidiomycota	Agaricomycetes	Auriculariales	Auriculariales family incertae sedis	Grammatus		wood_saprotroph					wood		non-aquatic			filamentous_mycelium	tremelloid	hydnoid					0	soil_saprotroph	0	0	0	0	soil	0	partly_aquatic	0	0	filamentous_mycelium	perithecium_(hymenium_hidden,_narrow_opening)	closed	0	0	0	0
OTU0307	Saccharomycetes genus Incertae sedis	0	0.00988908	jrk11203	Basidiomycota	Agaricomycetes	Auriculariales	Auriculariales family incertae sedis	Hyalodon		wood_saprotroph					wood		non-aquatic			filamentous_mycelium	tremelloid	hydnoid					#N/A	#N/A	#N/A	#N/A	#N/A	#N/A	#N/A	#N/A	#N/A	#N/A	#N/A	#N/A	#N/A	#N/A	#N/A	#N/A	#N/A	#N/A
OTU0308	Fungi genus Incertae sedis	0	0.00988908	jrk11204	Basidiomycota	Agaricomycetes	Auriculariales	Auriculariales family incertae sedis	Hydrophana		wood_saprotroph					wood		non-aquatic			filamentous_mycelium	tremelloid	smooth					#N/A	#N/A	#N/A	#N/A	#N/A	#N/A	#N/A	#N/A	#N/A	#N/A	#N/A	#N/A	#N/A	#N/A	#N/A	#N/A	#N/A	#N/A
OTU0309	Exophiala	0.00421283	0	jrk11205	Basidiomycota	Agaricomycetes	Auriculariales	Auriculariales family incertae sedis	Mycostilla		wood_saprotroph					wood		non-aquatic			filamentous_mycelium	tremelloid	smooth					0	animal_parasite	litter_saprotroph	0	root_endophyte_dark_septate	root-associated	leaf/fruit/seed,animal_material	0	partly_aquatic	animal_parasite/opportunistic_human_parasite	0	dimorphic_yeast	0	0	0	0	0	0
OTU0310	Pleuroascaceae genus Incertae sedis	0	0.0082409	jrk11206	Basidiomycota	Agaricomycetes	Auriculariales	Auriculariales family incertae sedis	Myxariellum		wood_saprotroph					wood		non-aquatic			filamentous_mycelium	tremelloid	smooth					#N/A	#N/A	#N/A	#N/A	#N/A	#N/A	#N/A	#N/A	#N/A	#N/A	#N/A	#N/A	#N/A	#N/A	#N/A	#N/A	#N/A	#N/A
OTU0311	Penicillium	0	0.0082409	jrk11207	Basidiomycota	Agaricomycetes	Auriculariales	Auriculariales family incertae sedis	Ofella		wood_saprotroph					wood		non-aquatic			filamentous_mycelium	tremelloid	smooth					0	unspecified_saprotroph	foliar_endophyte	toxin-producing,animal_parasite_some_species,mycoparasite_some_species	foliar_endophyte	0	soil	mold	partly_aquatic	opportunistic_human_parasite	0	filamentous_mycelium	0	0	0	0	0	0
OTU0312	Tympanidaceae genus Incertae sedis	0	0.0082409	jrk11208	Basidiomycota	Agaricomycetes	Auriculariales	Auriculariales family incertae sedis	Protoacia		wood_saprotroph					wood		non-aquatic			filamentous_mycelium	tremelloid	hydnoid					#N/A	#N/A	#N/A	#N/A	#N/A	#N/A	#N/A	#N/A	#N/A	#N/A	#N/A	#N/A	#N/A	#N/A	#N/A	#N/A	#N/A	#N/A
OTU0313	Tympanidaceae genus Incertae sedis	0	0.0082409	jrk11209	Basidiomycota	Agaricomycetes	Auriculariales	Auriculariales family incertae sedis	Stypellopsis		wood_saprotroph					wood		non-aquatic			filamentous_mycelium	tremelloid	smooth					#N/A	#N/A	#N/A	#N/A	#N/A	#N/A	#N/A	#N/A	#N/A	#N/A	#N/A	#N/A	#N/A	#N/A	#N/A	#N/A	#N/A	#N/A
OTU0314	Mortierella	0	0.0082409	jrk11210	Basidiomycota	Agaricomycetes	Boletales	Boletaceae	Indoporus		ectomycorrhizal							non-aquatic			filamentous_mycelium	agaricoid	poroid					0	soil_saprotroph	root-associated	0	root-associated	root-associated	roots,soil	chitinolytic	partly_aquatic	opportunistic_human_parasite	0	filamentous_mycelium	none	none	0	0	0	0
OTU0315	Mollisia	0	0.0082409	jrk11211	Basidiomycota	Agaricomycetes	Boletales	Boletaceae	Ionosporus		ectomycorrhizal							non-aquatic			filamentous_mycelium	agaricoid	poroid					0	plant_pathogen	litter_saprotroph	0	foliar_endophyte	leaf/fruit/seed_pathogen	leaf/fruit/seed	soft_rot	partly_freshwater_(partly_non-aquatic)	0	0	filamentous_mycelium	apothecium_(hymenium_on_surface)	smooth	0	0	0	0
OTU0316	Conioscypha	0	0.0082409		Basidiomycota	Agaricomycetes	Boletales	Boletaceae	Longistriata		ectomycorrhizal							non-aquatic			filamentous_mycelium	gasteroid-hypogeous	closed					0	wood_saprotroph	0	0	0	0	wood	0	partly_freshwater_(partly_non-aquatic)	0	0	filamentous_mycelium	none	none	0	0	0	0
OTU0317	Geomyces	0	0.0082409	jrk11212	Basidiomycota	Agaricomycetes	Boletales	Boletaceae	Spongispora		ectomycorrhizal							non-aquatic			filamentous_mycelium	agaricoid	poroid					0	soil_saprotroph	0	0	0	0	soil	0	partly_aquatic	0	0	filamentous_mycelium	cleistothecium_(closed,_spherical)	closed	0	0	0	0
OTU0318		0	0.0082409		Basidiomycota	Agaricomycetes	Cantharellales	Botryobasidiaceae	Neoacladium		wood_saprotroph					wood		non-aquatic			filamentous_mycelium	corticioid	smooth					#N/A	#N/A	#N/A	#N/A	#N/A	#N/A	#N/A	#N/A	#N/A	#N/A	#N/A	#N/A	#N/A	#N/A	#N/A	#N/A	#N/A	#N/A
OTU0319	Sporormiella	0	0.0082409		Basidiomycota	Agaricomycetes	Cantharellales	Hydnaceae	Bergerella		lichen_parasite	fungal_decomposer				fungal_material,algal_material		non-aquatic			filamentous_mycelium	none	none					0	litter_saprotroph	0	0	0	0	leaf/fruit/seed	0	partly_aquatic	0	0	filamentous_mycelium	0	0	0	0	0	0
OTU0320	Oidiodendron	0	0.0082409	jrk11213	Basidiomycota	Agaricomycetes	Corticiales	Corticiaceae	Laeticorticium	synonym of Corticium	wood_saprotroph					wood	white_rot	non-aquatic			filamentous_mycelium	corticioid	smooth					0	soil_saprotroph	root_endophyte	ericoid_mycorrhizal_O._maius	root_endophyte	root-associated	soil	0	partly_aquatic	0	0	filamentous_mycelium	0	0	0	0	0	0
OTU0321	Preussia	0	0.0082409		Basidiomycota	Agaricomycetes	Hymenochaetales	Hymenochaetaceae	Hydnoporia		wood_saprotroph					wood	white_rot	non-aquatic			filamentous_mycelium	corticioid	smooth					0	dung_saprotroph	0	0	0	0	dung	0	partly_aquatic	0	0	filamentous_mycelium	cleistothecium_(closed,_spherical)	closed	0	0	0	0
OTU0322	Ochroconis	0.00421283	0	jrk11214	Basidiomycota	Agaricomycetes	Hymenochaetales	Schizoporaceae	Grandinia	synonym of Xylodon	wood_saprotroph					wood	white_rot	partly_aquatic			filamentous_mycelium	corticioid	hydnoid					0	animal_parasite	plant_pathogen	0	0	leaf/fruit/seed_pathogen	leaf/fruit/seed,animal_material	0	partly_aquatic	opportunistic_human_parasite	0	filamentous_mycelium	perithecium_(hymenium_hidden,_narrow_opening)	closed	0	0	0	0
OTU0323	Sugiyamaella	0.00421283	0	jrk11215	Basidiomycota	Agaricomycetes	Polyporales	Fomitopsidaceae	Ranadivia	synonym of Daedalea	wood_saprotroph					wood	brown_rot	non-aquatic			filamentous_mycelium	polyporoid	poroid					0	animal_endosymbiont	nectar/tap_saprotroph	0	0	0	sugar-rich_substrates	0	non-aquatic	animal_endosymbiont	0	yeast	none	none	0	0	0	0
OTU0324	Aspergillus	0	0.0082409	jrk11216	Basidiomycota	Agaricomycetes	Polyporales	Incrustoporiaceae	Gloeoporellus		wood_saprotroph					wood		non-aquatic			filamentous_mycelium	polyporoid	poroid					0	unspecified_saprotroph	foliar_endophyte	hypervariable,_saprotroph_animal_pathogen_endophyte	foliar_endophyte	0	leaf/fruit/seed,soil,dung,animal_material	mold	partly_aquatic	animal_parasite/opportunistic_human_parasite	0	filamentous_mycelium	0	0	0	0	0	0
OTU0325	Calcarisporiella	0	0.0082409	jrk11217	Basidiomycota	Agaricomycetes	Polyporales	Irpicaceae	Resiniporus		wood_saprotroph					wood		non-aquatic			filamentous_mycelium	polyporoid	poroid					0	soil_saprotroph	0	extremophile_thermophile	0	0	soil	0	non-aquatic	0	0	filamentous_mycelium	none	none	0	0	0	0
OTU0326	Lindtneria	0	0.0082409	jrk11218	Basidiomycota	Agaricomycetes	Polyporales	Laetiporaceae	Kusaghiporia		wood_saprotroph					wood		non-aquatic			filamentous_mycelium	polyporoid	poroid					0	wood_saprotroph	0	0	0	0	wood	white_rot	non-aquatic	0	0	filamentous_mycelium	corticioid	smooth	0	0	0	0
OTU0327	Pluteus	0	0.0082409	jrk11220	Basidiomycota	Agaricomycetes	Polyporales	Meruliaceae	Hermanssonia		wood_saprotroph					wood	white_rot	non-aquatic			filamentous_mycelium	corticioid	smooth					0	litter_saprotroph	0	wood_saprotroph_many_species	0	0	leaf/fruit/seed	white_rot	non-aquatic	0	0	filamentous_mycelium	agaricoid	gills	0	0	0	0
OTU0328	Metacordyceps	0	0.0082409	jrk11221	Basidiomycota	Agaricomycetes	Polyporales	Meruliaceae	Hydnophanerochaete		wood_saprotroph					wood	white_rot	non-aquatic			filamentous_mycelium	corticioid	hydnoid					0	animal_parasite	animal_decomposer	0	0	0	animal_material	0	non-aquatic	animal_parasite	0	filamentous_mycelium	perithecium_(hymenium_hidden,_narrow_opening)	closed	0	0	0	0
OTU0329	Acremonium	0	0.0082409	jrk11222	Basidiomycota	Agaricomycetes	Polyporales	Meruliaceae	Pappia		wood_saprotroph					wood		non-aquatic			filamentous_mycelium							0	unspecified_saprotroph	foliar_endophyte	hypervariable	foliar_endophyte	leaf/fruit/seed_pathogen	leaf/fruit/seed,soil,dung,animal_material	soft_rot	partly_aquatic	0	0	filamentous_mycelium	0	0	0	0	0	0
OTU0330	Fungi genus Incertae sedis	0.00421283	0	jrk11223	Basidiomycota	Agaricomycetes	Polyporales	Meruliaceae	Stereophlebia		wood_saprotroph					wood	white-rot	non-aquatic			filamentous_mycelium	corticioid	other					#N/A	#N/A	#N/A	#N/A	#N/A	#N/A	#N/A	#N/A	#N/A	#N/A	#N/A	#N/A	#N/A	#N/A	#N/A	#N/A	#N/A	#N/A
OTU0331	Entoloma	0	0.0082409	jrk11224	Basidiomycota	Agaricomycetes	Polyporales	Phanerochaetaceae	Crepatura		wood_saprotroph					wood	white-rot	non-aquatic			filamentous_mycelium							0	soil_saprotroph	unspecified_symbiotroph	CHEGD_symbiotrophs,ectomycorrhizal_ca_10%_of_species	root-associated	root-associated	roots,soil	0	non-aquatic	0	0	filamentous_mycelium	agaricoid	gills	medium-distance_smooth	/entoloma	0	0
OTU0332	Cordycipitaceae genus Incertae sedis	0	0.0082409	jrk11225	Basidiomycota	Agaricomycetes	Polyporales	Phanerochaetaceae	Efibulella		wood_saprotroph					wood	white-rot	non-aquatic			filamentous_mycelium	corticioid	smooth					#N/A	#N/A	#N/A	#N/A	#N/A	#N/A	#N/A	#N/A	#N/A	#N/A	#N/A	#N/A	#N/A	#N/A	#N/A	#N/A	#N/A	#N/A
OTU0333	Phialemoniopsis	0	0.0082409	jrk11226	Basidiomycota	Agaricomycetes	Polyporales	Phanerochaetaceae	Odontoefibula		wood_saprotroph					wood	white-rot	non-aquatic			filamentous_mycelium	corticioid	hydnoid					0	animal_parasite	animal_decomposer	0	0	0	animal_material	0	0	animal_parasite/opportunistic_human_parasite	0	filamentous_mycelium	perithecium_(hymenium_hidden,_narrow_opening)	closed	0	0	0	0
OTU0334	Agaricomycetes genus Incertae sedis	0	0.0082409	jrk11227	Basidiomycota	Agaricomycetes	Polyporales	Polyporaceae	Cinereomycetella		wood_saprotroph					wood		non-aquatic			filamentous_mycelium	polyporoid	poroid					#N/A	#N/A	#N/A	#N/A	#N/A	#N/A	#N/A	#N/A	#N/A	#N/A	#N/A	#N/A	#N/A	#N/A	#N/A	#N/A	#N/A	#N/A
OTU0335	Backusella	0	0.0082409	jrk11228	Basidiomycota	Agaricomycetes	Polyporales	Polyporaceae	Dextrinoporus		wood_saprotroph					wood		non-aquatic			filamentous_mycelium	polyporoid	poroid					0	soil_saprotroph	dung_saprotroph	0	0	0	soil,dung	mold	non-aquatic	0	0	filamentous_mycelium	none	none	0	0	0	0
OTU0336	Geminibasidium	0	0.0082409	jrk11229	Basidiomycota	Agaricomycetes	Polyporales	Polyporaceae	Endopandanicola		foliar_endophyte	foliar_endophyte		foliar_endophyte				non-aquatic			filamentous_mycelium							0	soil_saprotroph	0	extremophile_xerophile_and_heat_resistant	0	0	soil	0	non-aquatic	0	0	filamentous_mycelium	none	none	0	0	0	0
OTU0337	Infundichalara	0.00421283	0	jrk11230	Basidiomycota	Agaricomycetes	Polyporales	Polyporaceae	Murinicarpus									non-aquatic			filamentous_mycelium	polyporoid	poroid					0	litter_saprotroph	0	0	0	0	leaf/fruit/seed	0	non-aquatic	0	Pinus	filamentous_mycelium	0	0	0	0	0	0
OTU0338	Cystobasidium	0.00421283	0	jrk11231	Basidiomycota	Agaricomycetes	Polyporales	Polyporaceae	Pilatotrama	synonym of Trametes	wood_saprotroph					wood	white-rot	non-aquatic			filamentous_mycelium	polyporoid	poroid					0	mycoparasite	fungal_decomposer	0	no_endophytic_capacity	0	fungal_material	0	partly_aquatic	0	Thelebolales	dimorphic_yeast	none	none	0	0	0	0
OTU0339	Sympoventuriaceae genus Incertae sedis	0	0.0082409	jrk11232	Basidiomycota	Agaricomycetes	Polyporales	Polyporaceae	Szczepkamyces		wood_saprotroph					wood	white-rot	non-aquatic			filamentous_mycelium	polyporoid	poroid					#N/A	#N/A	#N/A	#N/A	#N/A	#N/A	#N/A	#N/A	#N/A	#N/A	#N/A	#N/A	#N/A	#N/A	#N/A	#N/A	#N/A	#N/A
OTU0340	Ciliolarina	0.00421283	0	jrk11233	Basidiomycota	Agaricomycetes	Polyporales	Polyporales family incertae sedis	Amaropostia		wood_saprotroph					wood		non-aquatic			filamentous_mycelium	polyporoid	poroid					0	wood_saprotroph	0	0	0	0	wood	0	non-aquatic	0	Pinaceae	filamentous_mycelium	apothecium_(hymenium_on_surface)	smooth	0	0	0	0
OTU0341	Ascomycota genus Incertae sedis	0.00421283	0	jrk11234	Basidiomycota	Agaricomycetes	Polyporales	Polyporales family incertae sedis	Calcipostia		wood_saprotroph					wood		non-aquatic			filamentous_mycelium	polyporoid	poroid					#N/A	#N/A	#N/A	#N/A	#N/A	#N/A	#N/A	#N/A	#N/A	#N/A	#N/A	#N/A	#N/A	#N/A	#N/A	#N/A	#N/A	#N/A
OTU0342	Helotiales genus Incertae sedis	0.00421283	0	jrk11235	Basidiomycota	Agaricomycetes	Polyporales	Polyporales family incertae sedis	Cyanosporus		wood_saprotroph					wood		non-aquatic			filamentous_mycelium	polyporoid	poroid					#N/A	#N/A	#N/A	#N/A	#N/A	#N/A	#N/A	#N/A	#N/A	#N/A	#N/A	#N/A	#N/A	#N/A	#N/A	#N/A	#N/A	#N/A
OTU0343	Biscogniauxia	0.00421283	0	jrk11236	Basidiomycota	Agaricomycetes	Polyporales	Polyporales family incertae sedis	Cystidiopostia		wood_saprotroph					wood		non-aquatic			filamentous_mycelium	polyporoid	poroid					0	wood_saprotroph	foliar_endophyte	0	foliar_endophyte	wood_pathogen	wood,leaf/fruit/seed	0	non-aquatic	0	angiosperms	filamentous_mycelium	perithecium_(hymenium_hidden,_narrow_opening)	closed	0	0	0	0
OTU0344	Ascomycota genus Incertae sedis	0	0.00659272	jrk11237	Basidiomycota	Agaricomycetes	Polyporales	Polyporales family incertae sedis	Fuscopostia		wood_saprotroph					wood		non-aquatic			filamentous_mycelium	polyporoid	poroid					#N/A	#N/A	#N/A	#N/A	#N/A	#N/A	#N/A	#N/A	#N/A	#N/A	#N/A	#N/A	#N/A	#N/A	#N/A	#N/A	#N/A	#N/A
OTU0345		0	0.00659272	jrk11238	Basidiomycota	Agaricomycetes	Polyporales	Steccherinaceae	Elaphroporia		wood_saprotroph					wood		non-aquatic			filamentous_mycelium	polyporoid	poroid					#N/A	#N/A	#N/A	#N/A	#N/A	#N/A	#N/A	#N/A	#N/A	#N/A	#N/A	#N/A	#N/A	#N/A	#N/A	#N/A	#N/A	#N/A
OTU0346	Wallemia	0	0.00659272		Basidiomycota	Agaricomycetes	Polyporales	Steccherinaceae	Trianguloporus																			0	unspecified_saprotroph	0	extremophile_xerophile_for_high_salt_or_sugar_content	0	0	sugar-rich_substrates	0	partly_aquatic	0	0	filamentous_mycelium	none	none	0	0	0	0
OTU0347	Chytridiomycota genus Incertae sedis	0	0.00659272	jrk11239	Basidiomycota	Agaricomycetes	Polyporales	Steccherinaceae	Trullella		wood_saprotroph					wood	white_rot	non-aquatic			filamentous_mycelium	polyporoid	poroid					#N/A	#N/A	#N/A	#N/A	#N/A	#N/A	#N/A	#N/A	#N/A	#N/A	#N/A	#N/A	#N/A	#N/A	#N/A	#N/A	#N/A	#N/A
OTU0348	Pectenia	0	0.00659272		Basidiomycota	Agaricomycetes	Russulales	Peniophoraceae	Parapterulicium		litter_saprotroph					leaf/fruit/seed		non-aquatic			filamentous_mycelium	clavarioid	smooth					0	lichenized	0	0	0	0	0	0	non-aquatic	0	0	thallus_photosynthetic	apothecium_(hymenium_on_surface)	smooth	0	0	cyanobacterial	0
OTU0349	Agaricomycetes genus Incertae sedis	0	0.00659272	jrk11241	Basidiomycota	Agaricomycetes	Russulales	Stereaceae	Confertextum	Nom. invalid.	wood_saprotroph					wood		non-aquatic			filamentous_mycelium	corticioid	smooth					#N/A	#N/A	#N/A	#N/A	#N/A	#N/A	#N/A	#N/A	#N/A	#N/A	#N/A	#N/A	#N/A	#N/A	#N/A	#N/A	#N/A	#N/A
OTU0350	Sordariomycetes genus Incertae sedis	0	0.00659272	jrk11242	Basidiomycota	Agaricomycetes	Russulales	Stereaceae	Gloeosoma	synonym of Aleurodiscus	wood_saprotroph					wood	white_rot	non-aquatic			filamentous_mycelium	cyphelloid	other					#N/A	#N/A	#N/A	#N/A	#N/A	#N/A	#N/A	#N/A	#N/A	#N/A	#N/A	#N/A	#N/A	#N/A	#N/A	#N/A	#N/A	#N/A
OTU0351	Lepiota	0	0.00659272	jrk11243	Basidiomycota	Agaricomycetes	Russulales	Stereaceae	Matula	synonym of Aleurocystis	wood_saprotroph					wood	white_rot	non-aquatic			filamentous_mycelium	corticioid	smooth					0	litter_saprotroph	0	0	0	0	leaf/fruit/seed	0	non-aquatic	0	0	filamentous_mycelium	agaricoid	gills	0	0	0	0
OTU0352	Lasionectriopsis	0	0.00659272	jrk11244	Basidiomycota	Agaricostilbomycetes	Agaricostilbales	Agaricostilbaceae	Agaricostilbum		litter_saprotroph			no_endophytic_capacity		leaf/fruit/seed		non-aquatic		Arecaceae	dimorphic_yeast	other						#N/A	#N/A	#N/A	#N/A	#N/A	#N/A	#N/A	#N/A	#N/A	#N/A	#N/A	#N/A	#N/A	#N/A	#N/A	#N/A	#N/A	#N/A
OTU0353	Coprinellus	0	0.00659272		Basidiomycota	Agaricostilbomycetes	Agaricostilbales	Chionosphaeraceae	Boekhoutia		epiphyte																	0	soil_saprotroph	0	0	0	0	soil	0	partly_aquatic	0	0	filamentous_mycelium	agaricoid	gills	0	0	0	0
OTU0354	Blastobotrys	0.00337027	0		Basidiomycota	Agaricostilbomycetes	Agaricostilbales	Jianyuniaceae	Pseudosterigmatospora		epiphyte																	0	nectar/tap_saprotroph	0	0	0	0	sugar-rich_substrates	0	partly_aquatic	animal-associated	0	yeast	none	none	0	0	0	0
OTU0355	Neobulgaria	0	0.00659272		Basidiomycota	Agaricostilbomycetes	Agaricostilbales	Jianyuniaceae	Sterigmatospora		epiphyte																	0	wood_saprotroph	0	0	0	0	wood	0	non-aquatic	0	0	filamentous_mycelium	apothecium_(hymenium_on_surface)	smooth	0	0	0	0
OTU0356	Meira	0.00337027	0	jrk11245	Basidiomycota	Atractiellomycetes	Atractiellales	Phleogenaceae	Saccosoma		wood_saprotroph			no_endophytic_capacity		wood		non-aquatic			filamentous_mycelium	corticioid						0	plant_pathogen	0	0	no_endophytic_capacity	leaf/fruit/seed_pathogen	0	0	non-aquatic	0	0	dimorphic_yeast	none	none	0	0	0	0
OTU0357	Fungi genus Incertae sedis	0.00337027	0	jrk11246	Basidiomycota	Cystobasidiomycetes	Cystobasidiales	Cystobasidiaceae	Halobasidium		unspecified		salty_pickling_water	no_endophytic_capacity				aquatic			yeast	none	none					#N/A	#N/A	#N/A	#N/A	#N/A	#N/A	#N/A	#N/A	#N/A	#N/A	#N/A	#N/A	#N/A	#N/A	#N/A	#N/A	#N/A	#N/A
OTU0358	Neophaeosphaeriaceae genus Incertae sedis	0	0.00659272		Basidiomycota	Cystobasidiomycetes	Cystobasidiales	Cystobasidiales family incertae sedis	Begerowomyces		epiphyte										yeast	none	none					#N/A	#N/A	#N/A	#N/A	#N/A	#N/A	#N/A	#N/A	#N/A	#N/A	#N/A	#N/A	#N/A	#N/A	#N/A	#N/A	#N/A	#N/A
OTU0359	Leucocoprinus	0	0.00659272		Basidiomycota	Cystobasidiomycetes	Cystobasidiales	Cystobasidiales family incertae sedis	Robertozyma		soil_saprotroph					soil					yeast	none	none					0	soil_saprotroph	0	0	0	0	soil	0	non-aquatic	0	0	filamentous_mycelium	agaricoid	gills	0	0	0	0
OTU0360	Parengyodontium	0	0.00659272		Basidiomycota	Cystobasidiomycetes	Cystobasidiomycetes order incertae sedis	Cystobasidiomycetes family incertae sedis	Lichenozyma		lichen_parasite	fungal_decomposer				fungal_material,algal_material		non-aquatic			yeast	none	none					0	animal_parasite	plant_pathogen	0	0	leaf/fruit/seed_pathogen	leaf/fruit/seed,animal_material	keratinolytic	non-aquatic	opportunistic_human_parasite	0	filamentous_mycelium	0	0	0	0	0	0
OTU0361	Trichoderma	0.00337027	0	jrk11247	Basidiomycota	Cystobasidiomycetes	Cystobasidiomycetes order incertae sedis	Cystobasidiomycetes family incertae sedis	Queiroziella		epiphyte			no_endophytic_capacity						Tilandsia	yeast	none	none					0	mycoparasite	foliar_endophyte	hypervariable	foliar_endophyte	leaf/fruit/seed_pathogen	leaf/fruit/seed,soil,fungal_material	soft_rot	0	0	0	filamentous_mycelium	perithecium_(hymenium_hidden,_narrow_opening)	closed	0	0	0	0
OTU0362	Fungi genus Incertae sedis	0.00337027	0		Basidiomycota	Cystobasidiomycetes	Spiculogloeales	Spiculogloeales family incertae sedis	Meniscomyces		epiphyte	soil_saprotroph				soil		non-aquatic			yeast	none	none					#N/A	#N/A	#N/A	#N/A	#N/A	#N/A	#N/A	#N/A	#N/A	#N/A	#N/A	#N/A	#N/A	#N/A	#N/A	#N/A	#N/A	#N/A
OTU0363	Herpotrichiellaceae genus Incertae sedis	0	0.00659272	jrk11249	Basidiomycota	Microbotryomycetes	Heitmaniales	Heitmaniaceae	Heitmania		epiphyte			no_endophytic_capacity				non-aquatic			yeast	none	none					#N/A	#N/A	#N/A	#N/A	#N/A	#N/A	#N/A	#N/A	#N/A	#N/A	#N/A	#N/A	#N/A	#N/A	#N/A	#N/A	#N/A	#N/A
OTU0364	Cadophora	0	0.00659272	jrk11248	Basidiomycota	Microbotryomycetes	Heterogastridiales	Heterogastridiaceae	Krieglsteinera		mycoparasite	fungal_decomposer		no_endophytic_capacity		fungal_material		non-aquatic		Lasiophaeria	filamentous_mycelium	other						0	litter_saprotroph	plant_pathogen	ectomycorrhizal_C._finlandica	foliar_endophyte	leaf/fruit/seed_pathogen	leaf/fruit/seed	0	partly_aquatic	0	0	filamentous_mycelium	0	0	0	0	0	0
OTU0365	Atheliaceae genus Incertae sedis	0	0.00659272		Basidiomycota	Microbotryomycetes	Rosettozymales	Rosettozymaceae	Rosettozyma		epiphyte							non-aquatic			yeast	none	none					#N/A	#N/A	#N/A	#N/A	#N/A	#N/A	#N/A	#N/A	#N/A	#N/A	#N/A	#N/A	#N/A	#N/A	#N/A	#N/A	#N/A	#N/A
OTU0366	Hypomyces	0	0.00659272	jrk11250	Basidiomycota	Pucciniomycetes	Pucciniales	Pucciniaceae	Cerradoa		plant_pathogen		obligate_plant_pathogen	no_endophytic_capacity	leaf/fruit/seed_pathogen			non-aquatic			filamentous_mycelium	rust	other					0	mycoparasite	fungal_decomposer	0	0	0	fungal_material	0	0	0	0	filamentous_mycelium	perithecium_(hymenium_hidden,_narrow_opening)	closed	0	0	0	0
OTU0367	Sporidiobolales genus Incertae sedis	0	0.00659272	jrk11251	Basidiomycota	Tremellomycetes	Cystofilobasidiales	Mrakiaceae	Vustinia		soil_saprotroph					soil					yeast	none	none					#N/A	#N/A	#N/A	#N/A	#N/A	#N/A	#N/A	#N/A	#N/A	#N/A	#N/A	#N/A	#N/A	#N/A	#N/A	#N/A	#N/A	#N/A
OTU0368	Sydowia	0.00168513	0.00329636		Basidiomycota	Tremellomycetes	Tremellales	Cryptococcaceae	Teunia		soil_saprotroph	epiphyte									dimorphic_yeast							0	wood_saprotroph	plant_pathogen	0	no_endophytic_capacity	leaf/fruit/seed_pathogen	wood,leaf/fruit/seed	0	non-aquatic	0	0	filamentous_mycelium	perithecium_(hymenium_hidden,_narrow_opening)	closed	0	0	0	0
OTU0369	Hyphozyma	0	0.00659272	jrk11252	Basidiomycota	Tremellomycetes	Trichosporonales	Trichosporonaceae	Pascua		soil_saprotroph					soil					yeast	none	none					0	foliar_endophyte	litter_saprotroph	0	foliar_endophyte	0	leaf/fruit/seed	0	non-aquatic	0	0	filamentous_mycelium	0	0	0	0	0	0
OTU0370	Naematelia	0.00337027	0	jrk11253	Basidiomycota	Tremellomycetes	Trichosporonales	Trichosporonaceae	Prillingera		unspecified_saprotroph	epiphyte									yeast	none	none					0	mycoparasite	fungal_decomposer	0	0	0	fungal_material	0	non-aquatic	0	0	dimorphic_yeast	tremelloid	0	0	0	0	0
OTU0371	Exophiala	0.00337027	0	jrk11254	Basidiomycota	Ustilaginomycetes	Ustilaginales	Ustilaginaceae	Mycosarcoma	synonym of Ustilago and Sporisorium	plant_pathogen	epiphyte		foliar_endophyte	leaf/fruit/seed_pathogen			non-aquatic		monocots	dimorphic_yeast	smut	other					0	animal_parasite	litter_saprotroph	0	root_endophyte_dark_septate	root-associated	leaf/fruit/seed,animal_material	0	partly_aquatic	animal_parasite/opportunistic_human_parasite	0	dimorphic_yeast	0	0	0	0	0	0
OTU0372	Claussenomyces	0.00337027	0		Chytridiomycota	Chytridiomycetes	Chytridiomycota order incertae sedis	Quaeritorhizaceae	Quaeritorhiza		algal_parasite				algal_parasite													0	wood_saprotroph	0	0	0	0	wood	0	non-aquatic	0	0	filamentous_mycelium	apothecium_(hymenium_on_surface)	smooth	0	0	0	0
OTU0373	Ascomycota genus Incertae sedis	0.00337027	0	jrk11255	Glomeromycota	Glomeromycetes	Diversisporales	Diversisporaceae	Sieverdingia		arbuscular_mycorrhizal	root-associated		root_endophyte							filamentous_mycelium	none	none					#N/A	#N/A	#N/A	#N/A	#N/A	#N/A	#N/A	#N/A	#N/A	#N/A	#N/A	#N/A	#N/A	#N/A	#N/A	#N/A	#N/A	#N/A
OTU0374		0.00337027	0	jrk11256	Glomeromycota	Glomeromycetes	Glomerales	Glomeraceae	Funneliglomus		arbuscular_mycorrhizal	root-associated		root_endophyte							filamentous_mycelium	none	none					#N/A	#N/A	#N/A	#N/A	#N/A	#N/A	#N/A	#N/A	#N/A	#N/A	#N/A	#N/A	#N/A	#N/A	#N/A	#N/A	#N/A	#N/A
OTU0375	Penicillium	0	0.00659272	jrk11257	Glomeromycota	Glomeromycetes	Glomerales	Glomeraceae	Microdominikia		arbuscular_mycorrhizal	root-associated		root_endophyte							filamentous_mycelium	none	none					0	unspecified_saprotroph	foliar_endophyte	toxin-producing,animal_parasite_some_species,mycoparasite_some_species	foliar_endophyte	0	soil	mold	partly_aquatic	opportunistic_human_parasite	0	filamentous_mycelium	0	0	0	0	0	0
OTU0376	Coniochaeta	0	0.00659272	jrk11258	Glomeromycota	Glomeromycetes	Glomerales	Glomeraceae	Microkamienskia		arbuscular_mycorrhizal	root-associated		root_endophyte							filamentous_mycelium	none	none					0	unspecified_saprotroph	foliar_endophyte	hypervariable	foliar_endophyte	leaf/fruit/seed_pathogen	leaf/fruit/seed,soil,dung,animal_material	0	non-aquatic	animal_parasite	0	filamentous_mycelium	cleistothecium_(closed,_spherical)	closed	0	0	0	0
OTU0377	Ascomycota genus Incertae sedis	0.00337027	0	jrk11259	Glomeromycota	Glomeromycetes	Glomerales	Glomeraceae	Nanoglomus		arbuscular_mycorrhizal	root-associated		root_endophyte							filamentous_mycelium	none	none					#N/A	#N/A	#N/A	#N/A	#N/A	#N/A	#N/A	#N/A	#N/A	#N/A	#N/A	#N/A	#N/A	#N/A	#N/A	#N/A	#N/A	#N/A
OTU0378	Coprinellus	0	0.00659272	jrk11260	Glomeromycota	Glomeromycetes	Glomerales	Glomeraceae	Orientoglomus		arbuscular_mycorrhizal	root-associated		root_endophyte							filamentous_mycelium	none	none					0	soil_saprotroph	0	0	0	0	soil	0	partly_aquatic	0	0	filamentous_mycelium	agaricoid	gills	0	0	0	0
OTU0379	Ascomycota genus Incertae sedis	0.00337027	0		Neocallimastigomycota	Neocallimastigomycetes	Neocallimastigales	Neocallimastigaceae	Agriosomyces		animal_endosymbiont	litter_saprotroph	anaerobic_gut_fungus_decomposing_ingested_plant_biomass			leaf/fruit/seed		non-aquatic	animal_endosymbiont		zoosporic-rhizomycelial_(chytrid-like)	zoosporangium	closed					#N/A	#N/A	#N/A	#N/A	#N/A	#N/A	#N/A	#N/A	#N/A	#N/A	#N/A	#N/A	#N/A	#N/A	#N/A	#N/A	#N/A	#N/A
OTU0380	Capnodiales genus Incertae sedis	0	0.00659272		Neocallimastigomycota	Neocallimastigomycetes	Neocallimastigales	Neocallimastigaceae	Aklioshbomyces		animal_endosymbiont	litter_saprotroph	anaerobic_gut_fungus_decomposing_ingested_plant_biomass			leaf/fruit/seed		non-aquatic	animal_endosymbiont		zoosporic-rhizomycelial_(chytrid-like)	zoosporangium	closed					#N/A	#N/A	#N/A	#N/A	#N/A	#N/A	#N/A	#N/A	#N/A	#N/A	#N/A	#N/A	#N/A	#N/A	#N/A	#N/A	#N/A	#N/A
OTU0381	Metapochonia	0	0.00659272		Neocallimastigomycota	Neocallimastigomycetes	Neocallimastigales	Neocallimastigaceae	Capellomyces		animal_endosymbiont	litter_saprotroph	anaerobic_gut_fungus_decomposing_ingested_plant_biomass			leaf/fruit/seed		non-aquatic	animal_endosymbiont		zoosporic-rhizomycelial_(chytrid-like)	zoosporangium	closed					0	animal_parasite	animal_decomposer	0	0	0	animal_material	0	partly_aquatic	nematophagous	0	filamentous_mycelium	0	0	0	0	0	0
OTU0382	Cadophora	0	0.00659272	jrk11261	Neocallimastigomycota	Neocallimastigomycetes	Neocallimastigales	Neocallimastigaceae	Feramyces		animal_endosymbiont	litter_saprotroph	anaerobic_gut_fungus_decomposing_ingested_plant_biomass			leaf/fruit/seed		non-aquatic	animal_endosymbiont		zoosporic-rhizomycelial_(chytrid-like)	zoosporangium	closed					0	litter_saprotroph	plant_pathogen	ectomycorrhizal_C._finlandica	foliar_endophyte	leaf/fruit/seed_pathogen	leaf/fruit/seed	0	partly_aquatic	0	0	filamentous_mycelium	0	0	0	0	0	0
OTU0383	Thelephora	0	0.00659272		Neocallimastigomycota	Neocallimastigomycetes	Neocallimastigales	Neocallimastigaceae	Ghazallomyces		animal_endosymbiont	litter_saprotroph	anaerobic_gut_fungus_decomposing_ingested_plant_biomass			leaf/fruit/seed		non-aquatic	animal_endosymbiont		zoosporic-rhizomycelial_(chytrid-like)	zoosporangium	closed					0	ectomycorrhizal	0	0	0	0	0	0	non-aquatic	0	0	filamentous_mycelium	clavarioid	smooth	medium-distance_smooth	/tomentella-thelephora	0	0
OTU0384	Pyronema	0.00337027	0		Neocallimastigomycota	Neocallimastigomycetes	Neocallimastigales	Neocallimastigaceae	Joblinomyces		animal_endosymbiont	litter_saprotroph	anaerobic_gut_fungus_decomposing_ingested_plant_biomass			leaf/fruit/seed		non-aquatic	animal_endosymbiont		zoosporic-rhizomycelial_(chytrid-like)	zoosporangium	closed					0	soil_saprotroph	litter_saprotroph	0	foliar_endophyte	0	leaf/fruit/seed,soil	0	non-aquatic	0	0	filamentous_mycelium	apothecium_(hymenium_on_surface)	smooth	0	0	0	0
OTU0385	Devriesia	0	0.00659272		Neocallimastigomycota	Neocallimastigomycetes	Neocallimastigales	Neocallimastigaceae	Khoyollomyces		animal_endosymbiont	litter_saprotroph	anaerobic_gut_fungus_decomposing_ingested_plant_biomass			leaf/fruit/seed		non-aquatic	animal_endosymbiont		zoosporic-rhizomycelial_(chytrid-like)	zoosporangium	closed					0	plant_pathogen	litter_saprotroph	0	0	leaf/fruit/seed_pathogen	leaf/fruit/seed	0	non-aquatic	0	0	filamentous_mycelium	perithecium_(hymenium_hidden,_narrow_opening)	closed	0	0	0	0
OTU0386	Amylocorticiellum	0	0.00659272	jrk11262	Neocallimastigomycota	Neocallimastigomycetes	Neocallimastigales	Neocallimastigaceae	Liebetanzomyces		animal_endosymbiont	litter_saprotroph	anaerobic_gut_fungus_decomposing_ingested_plant_biomass			leaf/fruit/seed		non-aquatic	animal_endosymbiont		zoosporic-rhizomycelial_(chytrid-like)	zoosporangium	closed					0	wood_saprotroph	0	0	0	0	wood	brown_rot	non-aquatic	0	0	filamentous_mycelium	corticioid	smooth	0	0	0	0
OTU0387	Onygenaceae genus Incertae sedis	0	0.00659272	jrk11263	Neocallimastigomycota	Neocallimastigomycetes	Neocallimastigales	Neocallimastigaceae	Pecoramyces		animal_endosymbiont	litter_saprotroph	anaerobic_gut_fungus_decomposing_ingested_plant_biomass			leaf/fruit/seed		non-aquatic	animal_endosymbiont		zoosporic-rhizomycelial_(chytrid-like)	zoosporangium	closed					#N/A	#N/A	#N/A	#N/A	#N/A	#N/A	#N/A	#N/A	#N/A	#N/A	#N/A	#N/A	#N/A	#N/A	#N/A	#N/A	#N/A	#N/A
OTU0388	Acremonium	0	0.00659272		Neocallimastigomycota	Neocallimastigomycetes	Neocallimastigales	Neocallimastigaceae	Tahromyces		animal_endosymbiont	litter_saprotroph	anaerobic_gut_fungus_decomposing_ingested_plant_biomass			leaf/fruit/seed		non-aquatic	animal_endosymbiont		zoosporic-rhizomycelial_(chytrid-like)	zoosporangium	closed					0	unspecified_saprotroph	foliar_endophyte	hypervariable	foliar_endophyte	leaf/fruit/seed_pathogen	leaf/fruit/seed,soil,dung,animal_material	soft_rot	partly_aquatic	0	0	filamentous_mycelium	0	0	0	0	0	0
OTU0389	Verrucaria	0	0.00659272	jrk11264	Rozellomycota	Microsporidea	Glugeida	Spragueidae	Pseudokabatana		animal_parasite		obligate_animal_parasite	no_endophytic_capacity					animal_parasite		unicellular-aflagellate_(non-yeast)	none	none					0	lichenized	0	0	0	0	0	0	partly_aquatic	0	0	thallus_photosynthetic	0	0	0	0	chlorococcoid	0
OTU0390	Chytridiomycota genus Incertae sedis	0	0.00659272	jrk11265	Rozellomycota	Microsporidea	Nosematida	Nosematida family incertae sedis	Alternosema		animal_parasite		obligate_animal_parasite	no_endophytic_capacity					animal_parasite		unicellular-aflagellate_(non-yeast)	none	none					#N/A	#N/A	#N/A	#N/A	#N/A	#N/A	#N/A	#N/A	#N/A	#N/A	#N/A	#N/A	#N/A	#N/A	#N/A	#N/A	#N/A	#N/A
OTU0391	Penicillium	0.00337027	0	jrk11266	Rozellomycota	Microsporidea	Nosematida	Nosematida family incertae sedis	Percutemincola		animal_parasite		obligate_animal_parasite	no_endophytic_capacity					animal_parasite		unicellular-aflagellate_(non-yeast)	none	none					0	unspecified_saprotroph	foliar_endophyte	toxin-producing,animal_parasite_some_species,mycoparasite_some_species	foliar_endophyte	0	soil	mold	partly_aquatic	opportunistic_human_parasite	0	filamentous_mycelium	0	0	0	0	0	0
OTU0392	Exobasidium	0.00337027	0		Rozellomycota	Rozellomycota class incertae sedis	Rozellomycota order incertae sedis	Rozellomycota family incertae sedis	Morellospora		protistan_parasite			no_endophytic_capacity		protist_material			animal_parasite		unicellular-aflagellate_(non-yeast)	none	none					0	plant_pathogen	0	0	no_endophytic_capacity	leaf/fruit/seed_pathogen	0	0	non-aquatic	0	0	filamentous_mycelium	none	none	0	0	0	0
OTU0393	Aspergillus	0	0.00659272	jrk11267	Rozellomycota	Rudimicrosporea	Metchnikovellida	Metchnikovellidae	Caulleryetta		protistan_parasite			no_endophytic_capacity		protist_material					unicellular-aflagellate_(non-yeast)	none	none					0	unspecified_saprotroph	foliar_endophyte	hypervariable,_saprotroph_animal_pathogen_endophyte	foliar_endophyte	0	leaf/fruit/seed,soil,dung,animal_material	mold	partly_aquatic	animal_parasite/opportunistic_human_parasite	0	filamentous_mycelium	0	0	0	0	0	0
OTU0394	Tomentella	0	0.00494454	jrk11268	Zoopagomycota	Zoopagomycota class incertae sedis	Zoopagomycota order incertae sedis	Zoopagomycota family incertae sedis	Aenigmatomyces	taxonomy unclear	mycoparasite	fungal_decomposer				fungal_material					filamentous_mycelium							0	ectomycorrhizal	0	0	0	0	0	0	non-aquatic	0	0	filamentous_mycelium	corticioid	smooth	medium-distance_smooth	/tomentella-thelephora	0	0
OTU0395	Dothideomycetes genus Incertae sedis	0	0.00494454		Ascomycota	Dothideomycetes	Pleosporales	Didymosphaeriaceae	Cylindroaseptospora		litter_saprotroph										filamentous_mycelium							#N/A	#N/A	#N/A	#N/A	#N/A	#N/A	#N/A	#N/A	#N/A	#N/A	#N/A	#N/A	#N/A	#N/A	#N/A	#N/A	#N/A	#N/A
OTU0396	Tetracladium	0	0.00494454		Ascomycota	Orbiliomycetes	Orbiliales	Orbiliaceae	Amphosoma		wood_saprotroph	pollen_saprotroph				wood,pollen		non-aquatic			filamentous_mycelium	apothecium_(hymenium_on_surface)	smooth					0	litter_saprotroph	0	0	0	0	leaf/fruit/seed	0	partly_freshwater_(partly_non-aquatic)	0	0	filamentous_mycelium	0	0	0	0	0	0
OTU0397		0.0025277	0		Ascomycota	Sordariomycetes	Diaporthales	Stilbosporaceae	Prosthecium		wood_saprotroph					wood		non-aquatic			filamentous_mycelium	perithecium_(hymenium_hidden,_narrow_opening)	closed					#N/A	#N/A	#N/A	#N/A	#N/A	#N/A	#N/A	#N/A	#N/A	#N/A	#N/A	#N/A	#N/A	#N/A	#N/A	#N/A	#N/A	#N/A
OTU0398	Chaetomium	0	0.00494454		Ascomycota	Sordariomycetes	Glomerellales	Reticulascaceae	Chaetopsis		wood_saprotroph					wood		partly_freshwater_(partly_non-aquatic)			filamentous_mycelium	perithecium_(hymenium_hidden,_narrow_opening)	closed					0	litter_saprotroph	foliar_endophyte	hypervariable	foliar_endophyte	0	wood,leaf/fruit/seed,soil,dung	soft_rot	partly_aquatic	0	0	filamentous_mycelium	perithecium_(hymenium_hidden,_narrow_opening)	closed	0	0	0	0
OTU0399	Ascomycota genus Incertae sedis	0.0025277	0	jrk08793	Ascomycota	Sordariomycetes	Hypocreales	Nectriaceae	Tumenectria		litter_saprotroph					leaf/fruit/seed					filamentous_mycelium	perithecium_(hymenium_hidden,_narrow_opening)	closed					#N/A	#N/A	#N/A	#N/A	#N/A	#N/A	#N/A	#N/A	#N/A	#N/A	#N/A	#N/A	#N/A	#N/A	#N/A	#N/A	#N/A	#N/A
OTU0400	Gymnopilus	0	0.00494454		Ascomycota	Sordariomycetes	Sordariales	Chaetomiaceae	Brachychaeta		soil_saprotroph					soil		non-aquatic			filamentous_mycelium	perithecium_(hymenium_hidden,_narrow_opening)	closed					0	wood_saprotroph	0	litter_saprotroph_some_species	0	0	wood	white_rot	non-aquatic	0	0	filamentous_mycelium	agaricoid	gills	0	0	0	0
OTU0401	Aspergillus	0	0.00494454		Ascomycota	Sordariomycetes	Sordariales	Chaetomiaceae	Chrysanthotrichum		soil_saprotroph	dung_saprotroph				soil,dung		non-aquatic			filamentous_mycelium	perithecium_(hymenium_hidden,_narrow_opening)	closed					0	unspecified_saprotroph	foliar_endophyte	hypervariable,_saprotroph_animal_pathogen_endophyte	foliar_endophyte	0	leaf/fruit/seed,soil,dung,animal_material	mold	partly_aquatic	animal_parasite/opportunistic_human_parasite	0	filamentous_mycelium	0	0	0	0	0	0
OTU0402	Oidiodendron	0	0.00494454	jrk08805	Ascomycota	Sordariomycetes	Sordariales	Chaetomiaceae	Stolonocarpus		dung_saprotroph					dung		non-aquatic			filamentous_mycelium	perithecium_(hymenium_hidden,_narrow_opening)	closed					0	soil_saprotroph	root_endophyte	ericoid_mycorrhizal_O._maius	root_endophyte	root-associated	soil	0	partly_aquatic	0	0	filamentous_mycelium	0	0	0	0	0	0
OTU0403	Erythrobasidiales genus Incertae sedis	0.0025277	0		Basidiomycota	Agaricostilbomycetes	Agaricostilbales	Kondoaceae	Mastigobasidium		mycoparasite	fungal_decomposer				fungal_material					dimorphic_yeast							#N/A	#N/A	#N/A	#N/A	#N/A	#N/A	#N/A	#N/A	#N/A	#N/A	#N/A	#N/A	#N/A	#N/A	#N/A	#N/A	#N/A	#N/A
OTU0404	Pseudolaccaria	0	0.00494454	jrk09877	Ascomycota	Leotiomycetes	Helotiales	Hyaloscyphaceae	Remleria		wood_saprotroph					wood		non-aquatic			filamentous_mycelium	apothecium_(hymenium_on_surface)	smooth					0	litter_saprotroph	0	0	0	0	leaf/fruit/seed	0	non-aquatic	0	0	filamentous_mycelium	agaricoid	gills	0	0	0	0
OTU0405	Sistotrema	0	0.00494454		Ascomycota	Leotiomycetes	Leotiales	Tympanidaceae	Capturomyces												filamentous_mycelium							0	litter_saprotroph	0	ectomycorrhizal_many_species	0	0	leaf/fruit/seed	0	non-aquatic	0	0	filamentous_mycelium	corticioid	smooth	medium-distance_fringe	/cantharellus	0	0
OTU0406	Spizellomycetales genus Incertae sedis	0	0.00494454		Ascomycota	Leotiomycetes	Leotiales	Tympanidaceae	Variabilispora												filamentous_mycelium							#N/A	#N/A	#N/A	#N/A	#N/A	#N/A	#N/A	#N/A	#N/A	#N/A	#N/A	#N/A	#N/A	#N/A	#N/A	#N/A	#N/A	#N/A
OTU0407	Chaetothyriales genus Incertae sedis	0	0.00494454		Ascomycota	Leotiomycetes	Leotiales	Tympanidaceae	Vexillomyces												filamentous_mycelium							#N/A	#N/A	#N/A	#N/A	#N/A	#N/A	#N/A	#N/A	#N/A	#N/A	#N/A	#N/A	#N/A	#N/A	#N/A	#N/A	#N/A	#N/A
OTU0408	Extremaceae genus Incertae sedis	0.0025277	0	jrk05348	Ascomycota	Sordariomycetes	Xylariales	Xylariaceae	Muscodor		foliar_endophyte	wood_saprotroph		foliar_endophyte		wood,leaf/fruit/seed		non-aquatic			filamentous_mycelium	perithecium_(hymenium_hidden,_narrow_opening)	closed					#N/A	#N/A	#N/A	#N/A	#N/A	#N/A	#N/A	#N/A	#N/A	#N/A	#N/A	#N/A	#N/A	#N/A	#N/A	#N/A	#N/A	#N/A
OTU0409	Penicillium	0	0.00494454		Basidiomycota	Agaricomycetes	Agaricales	Agaricaceae	Bryoperdon		unspecified_saprotroph	bryophilous		moss-associated	moss-associated	leaf/fruit/seed		non-aquatic		mosses	filamentous_mycelium	gasteroid	closed					0	unspecified_saprotroph	foliar_endophyte	toxin-producing,animal_parasite_some_species,mycoparasite_some_species	foliar_endophyte	0	soil	mold	partly_aquatic	opportunistic_human_parasite	0	filamentous_mycelium	0	0	0	0	0	0
OTU0410	Chaetothyriales genus Incertae sedis	0.0025277	0		Basidiomycota	Agaricomycetes	Agaricales	Pterulaceae	Phaeopterula		litter_saprotroph					leaf/fruit/seed		non-aquatic			filamentous_mycelium	clavarioid	smooth					#N/A	#N/A	#N/A	#N/A	#N/A	#N/A	#N/A	#N/A	#N/A	#N/A	#N/A	#N/A	#N/A	#N/A	#N/A	#N/A	#N/A	#N/A
OTU0411	Coniophora	0	0.00494454		Basidiomycota	Agaricomycetes	Phallales	Phallaceae	Aseroë		soil_saprotroph					soil		non-aquatic			filamentous_mycelium	phalloid	gel					0	wood_saprotroph	0	0	0	0	wood	brown_rot	non-aquatic	0	0	filamentous_mycelium	corticioid	smooth	0	0	0	0
OTU0412	Eurotiomycetes genus Incertae sedis	0.0025277	0		Basidiomycota	Agaricomycetes	Polyporales	Polyporales family incertae sedis	Ceraceohydnum		wood_saprotroph					wood	white_rot	non-aquatic			filamentous_mycelium	corticioid	hydnoid					#N/A	#N/A	#N/A	#N/A	#N/A	#N/A	#N/A	#N/A	#N/A	#N/A	#N/A	#N/A	#N/A	#N/A	#N/A	#N/A	#N/A	#N/A
OTU0413	Capnobotryella	0.00168513	0.00164818		Basidiomycota	Agaricomycetes	Polyporales	Polyporales family incertae sedis	Ceraceomerulius	synonym of Meruliopsis	wood_saprotroph					wood	white_rot	non-aquatic			filamentous_mycelium	corticioid	smooth					0	litter_saprotroph	rock-inhabiting	0	0	0	leaf/fruit/seed,soil	0	non-aquatic	0	0	filamentous_mycelium	perithecium_(hymenium_hidden,_narrow_opening)	closed	0	0	0	0
OTU0414	Verrucaria	0	0.00494454		Basidiomycota	Microbotryomycetes	Camptobasidiales	Camptobasidiaceae	Cryolevonia		unspecified_saprotroph		extremophile_cryophile	no_endophytic_capacity							yeast	none	none					0	lichenized	0	0	0	0	0	0	partly_aquatic	0	0	thallus_photosynthetic	0	0	0	0	chlorococcoid	0
OTU0415	Penicillium	0	0.00494454		Basidiomycota	Pucciniomycetes	Pucciniales	Pucciniaceae	Neopuccinia		plant_pathogen		obligate_plant_pathogen	no_endophytic_capacity	leaf/fruit/seed_pathogen			non-aquatic		Burseraceae	filamentous_mycelium	rust	other					0	unspecified_saprotroph	foliar_endophyte	toxin-producing,animal_parasite_some_species,mycoparasite_some_species	foliar_endophyte	0	soil	mold	partly_aquatic	opportunistic_human_parasite	0	filamentous_mycelium	0	0	0	0	0	0
OTU0416	Cryptocoryneum	0	0.00494454		Basidiomycota	Pucciniomycetes	Pucciniales	Pucciniaceae	Quasipucciniastrum		plant_pathogen		obligate_plant_pathogen	no_endophytic_capacity	leaf/fruit/seed_pathogen			non-aquatic		Rosaceae	filamentous_mycelium	rust	other					0	wood_saprotroph	0	0	0	0	wood	0	0	0	0	filamentous_mycelium	0	0	0	0	0	0
OTU0417	Coniochaeta	0	0.00494454		Basidiomycota	Pucciniomycetes	Pucciniales	Raveneliaceae	Crossopsorella		plant_pathogen		obligate_plant_pathogen	no_endophytic_capacity	leaf/fruit/seed_pathogen			non-aquatic			filamentous_mycelium	rust	other					0	unspecified_saprotroph	foliar_endophyte	hypervariable	foliar_endophyte	leaf/fruit/seed_pathogen	leaf/fruit/seed,soil,dung,animal_material	0	non-aquatic	animal_parasite	0	filamentous_mycelium	cleistothecium_(closed,_spherical)	closed	0	0	0	0
OTU0418	Saccharomycetales genus Incertae sedis	0.0025277	0		Ascomycota	Dothideomycetes	Pleosporales	Longiostiolaceae	Shearia		wood_saprotroph	plant_pathogen			wood_pathogen	wood		non-aquatic			filamentous_mycelium	perithecium_(hymenium_hidden,_narrow_opening)	closed					#N/A	#N/A	#N/A	#N/A	#N/A	#N/A	#N/A	#N/A	#N/A	#N/A	#N/A	#N/A	#N/A	#N/A	#N/A	#N/A	#N/A	#N/A
OTU0419	Penicillium	0	0.00494454		Ascomycota	Dothideomycetes	Venturiales	Venturiaceae	Neocoleroa		plant_pathogen	wood_saprotroph	lichen_parasite_some_species		leaf/fruit/seed_pathogen	wood		non-aquatic			filamentous_mycelium							0	unspecified_saprotroph	foliar_endophyte	toxin-producing,animal_parasite_some_species,mycoparasite_some_species	foliar_endophyte	0	soil	mold	partly_aquatic	opportunistic_human_parasite	0	filamentous_mycelium	0	0	0	0	0	0
OTU0420	Ciliolarina	0.0025277	0		Ascomycota	Dothideomycetes	Venturiales	Venturiaceae	Sympodiella		litter_saprotroph					leaf/fruit/seed		non-aquatic			filamentous_mycelium							0	wood_saprotroph	0	0	0	0	wood	0	non-aquatic	0	Pinaceae	filamentous_mycelium	apothecium_(hymenium_on_surface)	smooth	0	0	0	0
OTU0421	Coleophoma	0	0.00494454		Ascomycota	Pezizomycetes	Pezizales	Pezizaceae	Ahmadea									non-aquatic			filamentous_mycelium	gasteroid-hypogeous	closed					0	plant_pathogen	foliar_endophyte	0	foliar_endophyte	leaf/fruit/seed_pathogen	leaf/fruit/seed	0	non-aquatic	0	0	filamentous_mycelium	0	0	0	0	0	0
OTU0422	Penicillium	0.0025277	0		Ascomycota	Pezizomycetes	Pezizales	Pezizaceae	Babosia									non-aquatic			filamentous_mycelium	gasteroid-hypogeous	closed					0	unspecified_saprotroph	foliar_endophyte	toxin-producing,animal_parasite_some_species,mycoparasite_some_species	foliar_endophyte	0	soil	mold	partly_aquatic	opportunistic_human_parasite	0	filamentous_mycelium	0	0	0	0	0	0
OTU0423	Paracremonium	0	0.00494454		Ascomycota	Lecanoromycetes	Lecanorales	Ramalinaceae	Tylocliostomum		lichenized							non-aquatic			thallus_photosynthetic	apothecium_(hymenium_on_surface)	smooth					0	animal_parasite	animal_decomposer	0	0	0	animal_material	0	non-aquatic	animal_parasite/opportunistic_human_parasite	0	filamentous_mycelium	0	0	0	0	0	0
OTU0424	Solicoccozyma	0	0.00494454		Ascomycota	Pezizomycetes	Pezizales	Geomoriaceae	Geomorium		ectomycorrhizal							non-aquatic			filamentous_mycelium			unknown	/tuber-helvella			0	soil_saprotroph	epiphyte	0	0	0	soil	0	partly_aquatic	0	0	yeast	none	none	0	0	0	0
OTU0425	Pragmopora	0.0025277	0		Ascomycota	Sordariomycetes	Sordariomycetes order incertae sedis	Junewangiaceae	Jennwenomyces		wood_saprotroph					wood		freshwater			filamentous_mycelium	perithecium_(hymenium_hidden,_narrow_opening)	closed					0	wood_saprotroph	0	0	0	0	wood	0	non-aquatic	0	0	filamentous_mycelium	apothecium_(hymenium_on_surface)	smooth	0	0	0	0
OTU0426	Penicillium	0	0.00494454		Basidiomycota	Agaricomycetes	Hymenochaetales	Schizoporaceae	Fasciodontia		wood_saprotroph					wood	white_rot	non-aquatic			filamentous_mycelium	corticioid	hydnoid					0	unspecified_saprotroph	foliar_endophyte	toxin-producing,animal_parasite_some_species,mycoparasite_some_species	foliar_endophyte	0	soil	mold	partly_aquatic	opportunistic_human_parasite	0	filamentous_mycelium	0	0	0	0	0	0
OTU0427	Exophiala	0	0.00494454		Entomophthoromycota	Entomophthoromycetes	Entomophthorales	Ancylistaceae	Capillidium		animal_parasite	animal_decomposer		no_endophytic_capacity		animal_material			animal_parasite/opportunistic_human_parasite		filamentous_mycelium							0	animal_parasite	litter_saprotroph	0	root_endophyte_dark_septate	root-associated	leaf/fruit/seed,animal_material	0	partly_aquatic	animal_parasite/opportunistic_human_parasite	0	dimorphic_yeast	0	0	0	0	0	0
OTU0428	Stemphylium	0	0.00494454		Entomophthoromycota	Entomophthoromycetes	Entomophthorales	Ancylistaceae	Microconidiobolus		animal_parasite	animal_decomposer		no_endophytic_capacity		animal_material			animal_parasite/opportunistic_human_parasite		filamentous_mycelium							0	plant_pathogen	litter_saprotroph	0	0	leaf/fruit/seed_pathogen	leaf/fruit/seed	soft_rot	partly_aquatic	0	0	filamentous_mycelium	0	0	0	0	0	0
OTU0429	Trematosphaeria	0	0.00494454		Entomophthoromycota	Entomophthoromycetes	Entomophthorales	Ancylistaceae	Neoconidiobolus		animal_parasite	animal_decomposer		no_endophytic_capacity		animal_material			animal_parasite/opportunistic_human_parasite		filamentous_mycelium							0	wood_saprotroph	0	0	no_endophytic_capacity	0	wood	0	partly_aquatic	0	0	filamentous_mycelium	perithecium_(hymenium_hidden,_narrow_opening)	closed	0	0	0	0
OTU0430	Hypocreales genus Incertae sedis	0	0.00494454	jrk02760	Ascomycota	Dothideomycetes	Asterinales	Asterinaceae	Dothidasteromella		epiphyte	plant_pathogen			leaf/fruit/seed_pathogen	leaf/fruit/seed		non-aquatic			filamentous_mycelium	thyrothecium_(tiny_flattened_disc,_aperture_in_the_middle)	closed					#N/A	#N/A	#N/A	#N/A	#N/A	#N/A	#N/A	#N/A	#N/A	#N/A	#N/A	#N/A	#N/A	#N/A	#N/A	#N/A	#N/A	#N/A
OTU0431	Alternaria	0.0025277	0	jrk08829	Ascomycota	Dothideomycetes	Dothideomycetes order incertae sedis	Thyrinulaceae	Thyrinula		epiphyte	plant_pathogen		foliar_endophyte	leaf/fruit/seed_pathogen	leaf/fruit/seed		non-aquatic			filamentous_mycelium	thyrothecium_(tiny_flattened_disc,_aperture_in_the_middle)	closed					0	plant_pathogen	litter_saprotroph	0	foliar_endophyte	leaf/fruit/seed_pathogen	leaf/fruit/seed	soft_rot	partly_aquatic	0	0	filamentous_mycelium	perithecium_(hymenium_hidden,_narrow_opening)	closed	0	0	0	0
OTU0432	Spizellomycetaceae genus Incertae sedis	0	0.00494454	jrk02818	Ascomycota	Dothideomycetes	Dothideomycetes order incertae sedis	Aulographaceae	Echidnodes		epiphyte	litter_saprotroph				leaf/fruit/seed		non-aquatic			filamentous_mycelium	thyrothecium_(tiny_flattened_disc,_aperture_in_the_middle)	closed					#N/A	#N/A	#N/A	#N/A	#N/A	#N/A	#N/A	#N/A	#N/A	#N/A	#N/A	#N/A	#N/A	#N/A	#N/A	#N/A	#N/A	#N/A
OTU0433	Dominikia	0	0.00494454	jrk04364	Ascomycota	Dothideomycetes	Pleosporales	Lophiotremataceae	Koordersiella		litter_saprotroph					leaf/fruit/seed		non-aquatic			filamentous_mycelium	perithecium_(hymenium_hidden,_narrow_opening)	closed					0	arbuscular_mycorrhizal	root-associated	0	root_endophyte	0	0	0	0	0	0	filamentous_mycelium	none	none	0	0	0	0
OTU0434	Trichothecium	0	0.00494454	jrk00232	Ascomycota	Dothideomycetes	Pleosporales	Phaeosphaeriaceae	Alloneottiosporina		litter_saprotroph	plant_pathogen			leaf/fruit/seed_pathogen	leaf/fruit/seed		non-aquatic			filamentous_mycelium	perithecium_(hymenium_hidden,_narrow_opening)	closed					0	plant_pathogen	litter_saprotroph	mycoparasite_some_species	0	leaf/fruit/seed_pathogen	leaf/fruit/seed	0	0	0	0	filamentous_mycelium	0	0	0	0	0	0
OTU0435	Talaromyces	0	0.00494454	jrk00632	Ascomycota	Dothideomycetes	Tubeufiales	Tubeufiaceae	Artocarpomyces		litter_saprotroph					leaf/fruit/seed					filamentous_mycelium							0	unspecified_saprotroph	0	hyperviariable,_thermophile,_some_species_animal_parasite_some_species_various_saprotrophs	0	0	leaf/fruit/seed,soil,animal_material	mold	partly_aquatic	opportunistic_human_parasite	0	filamentous_mycelium	0	0	0	0	0	0
OTU0436	Coprinellus	0	0.00494454	jrk08238	Basidiomycota	Agaricomycetes	Russulales	Bondarzewiaceae	Spiniger	Synonym of Heterobasidion	plant_pathogen	wood_saprotroph			wood_pathogen	wood	white_rot	non-aquatic			filamentous_mycelium	polyporoid	poroid					0	soil_saprotroph	0	0	0	0	soil	0	partly_aquatic	0	0	filamentous_mycelium	agaricoid	gills	0	0	0	0
OTU0437	Spizellomycetaceae genus Incertae sedis	0.0025277	0	jrk07248	Ascomycota	Dothideomycetes	Acrospermales	Acrospermaceae	Pseudovirgaria		mycoparasite	fungal_decomposer	fungicolous			fungal_material		non-aquatic			filamentous_mycelium	perithecium_(hymenium_hidden,_narrow_opening)	closed					#N/A	#N/A	#N/A	#N/A	#N/A	#N/A	#N/A	#N/A	#N/A	#N/A	#N/A	#N/A	#N/A	#N/A	#N/A	#N/A	#N/A	#N/A
OTU0438	Coniophora	0	0.00494454	jrk01497	Ascomycota	Dothideomycetes	Asterinales	Asterinales family incertae sedis	Caudella		epiphyte	litter_saprotroph				leaf/fruit/seed		non-aquatic			filamentous_mycelium	thyrothecium_(tiny_flattened_disc,_aperture_in_the_middle)						0	wood_saprotroph	0	0	0	0	wood	brown_rot	non-aquatic	0	0	filamentous_mycelium	corticioid	smooth	0	0	0	0
OTU0439	Myriodontium	0	0.00494454	jrk05290	Ascomycota	Dothideomycetes	Asterinales	Morenoinaceae	Morenoina		litter_saprotroph					wood,leaf/fruit/seed		non-aquatic			filamentous_mycelium	thyrothecium_(tiny_flattened_disc,_aperture_in_the_middle)	closed					0	soil_saprotroph	animal_decomposer	0	0	0	soil,animal_material	keratinolytic	non-aquatic	0	0	filamentous_mycelium	0	0	0	0	0	0
OTU0440	Leotiomycetes genus Incertae sedis	0	0.00494454	jrk00718	Ascomycota	Dothideomycetes	Dothideales	Dothideales family incertae sedis	Asteromellopsis		wood_saprotroph			no_endophytic_capacity		wood		non-aquatic			filamentous_mycelium	perithecium_(hymenium_hidden,_narrow_opening)	closed					#N/A	#N/A	#N/A	#N/A	#N/A	#N/A	#N/A	#N/A	#N/A	#N/A	#N/A	#N/A	#N/A	#N/A	#N/A	#N/A	#N/A	#N/A
OTU0441	Rhodotorula	0.000842566	0.00329636	jrk02020	Ascomycota	Dothideomycetes	Dothideales	Dothideales family incertae sedis	Coniozyma		plant_pathogen	litter_saprotroph		foliar_endophyte	leaf/fruit/seed_pathogen	leaf/fruit/seed		non-aquatic			filamentous_mycelium	cleistothecium_(closed,_spherical)	closed					0	unspecified_saprotroph	foliar_endophyte	0	foliar_endophyte	0	0	0	partly_aquatic	opportunistic_human_parasite	0	yeast	none	none	0	0	0	0
OTU0442	Colacogloea	0.0025277	0	jrk03920	Ascomycota	Dothideomycetes	Dothideales	Dothideales family incertae sedis	Hormonema		unspecified_saprotroph	animal_decomposer		no_endophytic_capacity		animal_material	other	non-aquatic	animal-associated/opportunistic_human_parasite		dimorphic_yeast	other						0	mycoparasite	fungal_decomposer	0	no_endophytic_capacity	0	fungal_material	0	non-aquatic	0	0	dimorphic_yeast	none	none	0	0	0	0
OTU0443	Neodevriesia	0.000842566	0.00329636	jrk06930	Ascomycota	Dothideomycetes	Dothideales	Dothideales family incertae sedis	Pringsheimia		wood_saprotroph			no_endophytic_capacity		wood		non-aquatic			filamentous_mycelium	perithecium_(hymenium_hidden,_narrow_opening)	closed					0	plant_pathogen	litter_saprotroph	0	0	leaf/fruit/seed_pathogen	leaf/fruit/seed	0	partly_aquatic	0	0	filamentous_mycelium	perithecium_(hymenium_hidden,_narrow_opening)	closed	0	0	0	0
OTU0444	Dominikia	0	0.00494454	jrk09683	Ascomycota	Dothideomycetes	Dothideales	Neocelosporiaceae	Celosporium		plant_pathogen	litter_saprotroph			leaf/fruit/seed_pathogen	leaf/fruit/seed		non-aquatic			filamentous_mycelium	cleistothecium_(closed,_spherical)	closed					0	arbuscular_mycorrhizal	root-associated	0	root_endophyte	0	0	0	0	0	0	filamentous_mycelium	none	none	0	0	0	0
OTU0445	Botryotrichum	0	0.00494454	jrk03838	Ascomycota	Dothideomycetes	Dothideomycetes order incertae sedis	Dothideomycetes family incertae sedis	Heteroconium		sooty_mold	litter_saprotroph	ericoid_mycorrhizal_one_species	root_endophyte_dark_septate		leaf/fruit/seed,sugar-rich_substrates		non-aquatic			filamentous_mycelium							0	unspecified_saprotroph	0	litter_saprotroph_some_species	0	0	0	0	non-aquatic	0	0	filamentous_mycelium	none	none	0	0	0	0
OTU0446	Leohumicola	0	0.00329636	jrk04084	Ascomycota	Dothideomycetes	Dothideomycetes order incertae sedis	Dothideomycetes family incertae sedis	Hysterographium		wood_saprotroph					wood		non-aquatic			filamentous_mycelium	hysterothecium_(opening_slith-like)	closed					0	soil_saprotroph	ericoid_mycorrhizal	0	root_endophyte_dark_septate	root-associated	soil,roots	0	non-aquatic	0	0	filamentous_mycelium	none	none	0	0	0	0
OTU0447	Fungi genus Incertae sedis	0.00168513	0	jrk05273	Ascomycota	Dothideomycetes	Dothideomycetes order incertae sedis	Dothideomycetes family incertae sedis	Monorhizina		epiphyte	litter_saprotroph				leaf/fruit/seed		non-aquatic			filamentous_mycelium							#N/A	#N/A	#N/A	#N/A	#N/A	#N/A	#N/A	#N/A	#N/A	#N/A	#N/A	#N/A	#N/A	#N/A	#N/A	#N/A	#N/A	#N/A
OTU0448	Bovista	0	0.00329636	jrk03273	Ascomycota	Dothideomycetes	Dothideomycetes order incertae sedis	Eriomycetaceae	Funbolia		wood_saprotroph					wood					filamentous_mycelium							0	soil_saprotroph	0	0	0	0	soil	0	non-aquatic	0	0	filamentous_mycelium	gasteroid	closed	0	0	0	0
OTU0449	Colacogloea	0.00168513	0	jrk01056	Ascomycota	Dothideomycetes	Dothideomycetes order incertae sedis	Thyrinulaceae	Blastacervulus		epiphyte	litter_saprotroph			leaf/fruit/seed_pathogen	leaf/fruit/seed		non-aquatic			filamentous_mycelium	perithecium_(hymenium_hidden,_narrow_opening)	closed					0	mycoparasite	fungal_decomposer	0	no_endophytic_capacity	0	fungal_material	0	non-aquatic	0	0	dimorphic_yeast	none	none	0	0	0	0
OTU0450	Ceraceomyces	0	0.00329636	jrk06136	Ascomycota	Dothideomycetes	Dothideomycetes order incertae sedis	Thyrinulaceae	Paraopeba		epiphyte	plant_pathogen			leaf/fruit/seed_pathogen	leaf/fruit/seed		non-aquatic			filamentous_mycelium							0	wood_saprotroph	0	0	0	0	wood	white_rot	non-aquatic	0	0	filamentous_mycelium	corticioid	smooth	0	0	0	0
OTU0451	Mytilinidion	0.00168513	0	jrk03667	Ascomycota	Dothideomycetes	Microthyriales	Microthyriaceae	Hamatispora		litter_saprotroph					leaf/fruit/seed		non-aquatic			filamentous_mycelium							0	wood_saprotroph	0	0	0	0	wood	soft_rot	non-aquatic	0	0	filamentous_mycelium	hysterothecium_(opening_slith-like)	closed	0	0	0	0
OTU0452	Beauveria	0	0.00329636	jrk03674	Ascomycota	Dothideomycetes	Microthyriales	Microthyriaceae	Hansfordiella		epiphyte	litter_saprotroph				leaf/fruit/seed		non-aquatic			filamentous_mycelium							0	animal_parasite	animal_decomposer	0	foliar_endophyte	0	animal_material	0	partly_aquatic	invertebrate_parasite	0	filamentous_mycelium	0	0	0	0	0	0
OTU0453	Xenopolyscytalum	0.00168513	0	jrk07158	Ascomycota	Dothideomycetes	Microthyriales	Microthyriaceae	Pseudopenidiella		litter_saprotroph					leaf/fruit/seed		non-aquatic			filamentous_mycelium	perithecium_(hymenium_hidden,_narrow_opening)	closed					0	litter_saprotroph	foliar_endophyte	0	foliar_endophyte	0	leaf/fruit/seed	0	non-aquatic	0	0	filamentous_mycelium	0	0	0	0	0	0
OTU0454	Rhizopus	0.00168513	0	jrk03729	Ascomycota	Dothideomycetes	Monoblastiales	Eriomycetaceae	Heleiosa		litter_saprotroph					leaf/fruit/seed		marine			filamentous_mycelium	perithecium_(hymenium_hidden,_narrow_opening)	closed					0	soil_saprotroph	plant_pathogen	0	0	leaf/fruit/seed_pathogen	leaf/fruit/seed,soil	mold	non-aquatic	opportunistic_human_parasite	0	filamentous_mycelium	none	none	0	0	0	0
OTU0455	Ciliolarina	0.00168513	0	jrk06719	Ascomycota	Dothideomycetes	Parmulariales	Parmulariaceae	Pleiostomellina												filamentous_mycelium							0	wood_saprotroph	0	0	0	0	wood	0	non-aquatic	0	Pinaceae	filamentous_mycelium	apothecium_(hymenium_on_surface)	smooth	0	0	0	0
OTU0456	Penicillium	0	0.00329636	jrk08570	Ascomycota	Dothideomycetes	Parmulariales	Parmulariaceae	Syrropeltis												filamentous_mycelium							0	unspecified_saprotroph	foliar_endophyte	toxin-producing,animal_parasite_some_species,mycoparasite_some_species	foliar_endophyte	0	soil	mold	partly_aquatic	opportunistic_human_parasite	0	filamentous_mycelium	0	0	0	0	0	0
OTU0457	Capnobotryella	0	0.00329636	jrk02256	Ascomycota	Dothideomycetes	Pleosporales	Didymosphaeriaceae	Curreya		litter_saprotroph					leaf/fruit/seed					filamentous_mycelium							0	litter_saprotroph	rock-inhabiting	0	0	0	leaf/fruit/seed,soil	0	non-aquatic	0	0	filamentous_mycelium	perithecium_(hymenium_hidden,_narrow_opening)	closed	0	0	0	0
OTU0458	Rhodosporidiobolus	0.00168513	0	jrk00970	Ascomycota	Dothideomycetes	Pleosporales	Dothidotthiaceae	Belizeana		wood_saprotroph	plant_pathogen				wood,leaf/fruit/seed		non-aquatic			filamentous_mycelium	perithecium_(hymenium_hidden,_narrow_opening)	closed					0	unspecified_saprotroph	0	0	0	0	0	0	partly_aquatic	0	0	yeast	none	none	0	0	0	0
OTU0459	Agaricus	0	0.00329636	jrk04782	Ascomycota	Dothideomycetes	Pleosporales	Longiostiolaceae	Longiostiolum		wood_saprotroph			no_endophytic_capacity		wood		non-aquatic			filamentous_mycelium	perithecium_(hymenium_hidden,_narrow_opening)	closed					0	soil_saprotroph	0	0	0	0	soil	0	non-aquatic	0	0	filamentous_mycelium	agaricoid	gills	0	0	0	0
OTU0460	Fungi genus Incertae sedis	0	0.00329636	jrk07039	Ascomycota	Dothideomycetes	Pleosporales	Macrodiplodiopsidaceae	Pseudochaetosphaeronema		litter_saprotroph	plant_pathogen		foliar_endophyte	leaf/fruit/seed_pathogen	leaf/fruit/seed		partly_freshwater_(partly_non-aquatic)			filamentous_mycelium	perithecium_(hymenium_hidden,_narrow_opening)	closed					#N/A	#N/A	#N/A	#N/A	#N/A	#N/A	#N/A	#N/A	#N/A	#N/A	#N/A	#N/A	#N/A	#N/A	#N/A	#N/A	#N/A	#N/A
OTU0461	Spizellomycetales genus Incertae sedis	0	0.00329636	jrk06547	Ascomycota	Dothideomycetes	Pleosporales	Melanommataceae	Phragmotrichum																			#N/A	#N/A	#N/A	#N/A	#N/A	#N/A	#N/A	#N/A	#N/A	#N/A	#N/A	#N/A	#N/A	#N/A	#N/A	#N/A	#N/A	#N/A
OTU0462	Fungi genus Incertae sedis	0	0.00329636	jrk05320	Ascomycota	Dothideomycetes	Pleosporales	Neocelosporiaceae	Muellerites		wood_saprotroph			no_endophytic_capacity		wood		non-aquatic			filamentous_mycelium	perithecium_(hymenium_hidden,_narrow_opening)	closed					#N/A	#N/A	#N/A	#N/A	#N/A	#N/A	#N/A	#N/A	#N/A	#N/A	#N/A	#N/A	#N/A	#N/A	#N/A	#N/A	#N/A	#N/A
OTU0463	Kauffmania	0	0.00329636	jrk05654	Ascomycota	Dothideomycetes	Pleosporales	Neomassarinaceae	Neomassarina		wood_saprotroph			no_endophytic_capacity		wood		non-aquatic			filamentous_mycelium	perithecium_(hymenium_hidden,_narrow_opening)	closed					0	wood_saprotroph	0	0	0	0	wood	0	non-aquatic	0	0	filamentous_mycelium	agaricoid	gills	0	0	0	0
OTU0464	Lycoperdon	0	0.00329636	jrk03887	Ascomycota	Dothideomycetes	Pleosporales	Pleosporales family incertae sedis	Hobus		litter_saprotroph	wood_saprotroph		no_endophytic_capacity		wood,leaf/fruit/seed		non-aquatic			filamentous_mycelium	perithecium_(hymenium_hidden,_narrow_opening)	closed					0	litter_saprotroph	0	0	0	0	leaf/fruit/seed	0	non-aquatic	0	0	filamentous_mycelium	gasteroid	closed	0	0	0	0
OTU0465	Clavaria	0	0.00329636	jrk01861	Ascomycota	Dothideomycetes	Pleosporales	Pseudolophiotremataceae	Clematidis		wood_saprotroph					wood		non-aquatic			filamentous_mycelium	perithecium_(hymenium_hidden,_narrow_opening)	closed					0	soil_saprotroph	unspecified_symbiotroph	CHEGD_symbiotrophs	root-associated	root-associated	roots,soil	0	non-aquatic	0	0	filamentous_mycelium	clavarioid	smooth	0	0	0	0
OTU0466	Infundichalara	0.00168513	0	jrk07119	Ascomycota	Dothideomycetes	Pleosporales	Pseudolophiotremataceae	Pseudolophiotrema		litter_saprotroph					leaf/fruit/seed		non-aquatic			filamentous_mycelium	perithecium_(hymenium_hidden,_narrow_opening)	closed					0	litter_saprotroph	0	0	0	0	leaf/fruit/seed	0	non-aquatic	0	Pinus	filamentous_mycelium	0	0	0	0	0	0
OTU0467	Rhinocladiella	0	0.00329636	jrk09714	Ascomycota	Dothideomycetes	Pleosporales	Tetraplosphaeriaceae	Byssolophis		wood_saprotroph					wood	soft_rot				filamentous_mycelium							0	soil_saprotroph	animal_parasite	0	root_endophyte_dark_septate	root-associated	soil,animal_material	0	partly_freshwater_(partly_non-aquatic)	animal_parasite/opportunistic_human_parasite	0	dimorphic_yeast	0	0	0	0	0	0
OTU0468	Oidiodendron	0	0.00329636	jrk08174	Ascomycota	Dothideomycetes	Tubeufiales	Wiesneriomycetaceae	Speiropsis		litter_saprotroph	wood_saprotroph				wood,leaf/fruit/seed		partly_freshwater_(partly_non-aquatic)			filamentous_mycelium							0	soil_saprotroph	root_endophyte	ericoid_mycorrhizal_O._maius	root_endophyte	root-associated	soil	0	partly_aquatic	0	0	filamentous_mycelium	0	0	0	0	0	0
OTU0469	Trichoderma	0	0.00329636	jrk02821	Ascomycota	Dothideomycetes	Venturiales	Sympoventuriaceae	Echinocatena		litter_saprotroph					leaf/fruit/seed		non-aquatic			filamentous_mycelium							0	mycoparasite	foliar_endophyte	hypervariable	foliar_endophyte	leaf/fruit/seed_pathogen	leaf/fruit/seed,soil,fungal_material	soft_rot	0	0	0	filamentous_mycelium	perithecium_(hymenium_hidden,_narrow_opening)	closed	0	0	0	0
OTU0470	Agaricostilbales genus Incertae sedis	0.00168513	0	jrk02646	Ascomycota	Dothideomycetes	Venturiales	Venturiaceae	Dimeriella		plant_pathogen					leaf/fruit/seed		non-aquatic			filamentous_mycelium							#N/A	#N/A	#N/A	#N/A	#N/A	#N/A	#N/A	#N/A	#N/A	#N/A	#N/A	#N/A	#N/A	#N/A	#N/A	#N/A	#N/A	#N/A
OTU0471	Trichoderma	0	0.00329636	jrk00967	Ascomycota	Eurotiomycetes	Chaetothyriales	Chaetothyriaceae	Beelia		plant_pathogen	litter_saprotroph			leaf/fruit/seed_pathogen	leaf/fruit/seed		non-aquatic			filamentous_mycelium							0	mycoparasite	foliar_endophyte	hypervariable	foliar_endophyte	leaf/fruit/seed_pathogen	leaf/fruit/seed,soil,fungal_material	soft_rot	0	0	0	filamentous_mycelium	perithecium_(hymenium_hidden,_narrow_opening)	closed	0	0	0	0
OTU0472	Psathyrella	0	0.00329636	jrk02906	Ascomycota	Eurotiomycetes	Verrucariales	Lichenotheliaceae	Endococcus		lichen_parasite	fungal_decomposer				fungal_material,algal_material		non-aquatic			filamentous_mycelium	perithecium_(hymenium_hidden,_narrow_opening)	closed					0	wood_saprotroph	litter_saprotroph	0	0	0	wood,leaf/fruit/seed	0	partly_aquatic	0	0	filamentous_mycelium	agaricoid	gills	0	0	0	0
OTU0473	Hebeloma	0	0.00329636		Ascomycota	Lecanoromycetes	Ostropales	Odontotremataceae	Parakarstenia		unspecified_saprotroph							non-aquatic			filamentous_mycelium	apothecium_(hymenium_on_surface)	smooth					0	ectomycorrhizal	0	0	0	0	0	0	non-aquatic	0	0	filamentous_mycelium	agaricoid	gills	short-distance_delicate	/hebeloma-alnicola	0	0
OTU0474	Gongronella	0	0.00329636	jrk00309	Ascomycota	Leotiomycetes	Helotiales	Amorphothecaceae	Amorphotheca		unspecified_saprotroph		extremophile_hydrocarbon-rich_substrates_(fuel)			hydrocarbon-rich_substrates_(fuel)		partly_aquatic			filamentous_mycelium							0	soil_saprotroph	0	0	0	0	soil	mold	non-aquatic	0	0	filamentous_mycelium	none	none	0	0	0	0
OTU0475	Oliveonia	0.00168513	0	jrk01269	Ascomycota	Leotiomycetes	Helotiales	Amorphothecaceae	Byssoascus		soil_saprotroph	root-associated		root-associated	root-associated	roots,soil		non-aquatic			filamentous_mycelium	other						0	wood_saprotroph	0	0	0	0	wood	0	non-aquatic	0	0	filamentous_mycelium	corticioid	smooth	0	0	0	0
OTU0476	Tritirachiaceae genus Incertae sedis	0	0.00329636	jrk03916	Ascomycota	Leotiomycetes	Helotiales	Amorphothecaceae	Hormoconis		wood_saprotroph					wood		non-aquatic			filamentous_mycelium							#N/A	#N/A	#N/A	#N/A	#N/A	#N/A	#N/A	#N/A	#N/A	#N/A	#N/A	#N/A	#N/A	#N/A	#N/A	#N/A	#N/A	#N/A
OTU0477	Acrostalagmus	0	0.00329636	jrk05423	Ascomycota	Leotiomycetes	Helotiales	Amorphothecaceae	Mycosylva		dung_saprotroph										filamentous_mycelium							0	foliar_endophyte	litter_saprotroph	0	foliar_endophyte	0	leaf/fruit/seed	0	partly_aquatic	0	0	filamentous_mycelium	none	none	0	0	0	0
OTU0478	Metarhizium	0	0.00329636	jrk05492	Ascomycota	Leotiomycetes	Helotiales	Amorphothecaceae	Myxotrichum		soil_saprotroph	foliar_endophyte	dung_saprotroph_some_species,root-associated	foliar_endophyte	root-associated	soil		non-aquatic			filamentous_mycelium	other						0	animal_parasite	animal_decomposer	0	0	0	animal_material	0	partly_aquatic	animal_parasite	0	filamentous_mycelium	0	0	0	0	0	0
OTU0479	Pochonia	0	0.00329636	jrk05883	Ascomycota	Leotiomycetes	Helotiales	Amorphothecaceae	Oidiodendron		soil_saprotroph	root_endophyte	ericoid_mycorrhizal_O._maius	root_endophyte	root-associated	soil		partly_aquatic			filamentous_mycelium							0	animal_parasite	animal_decomposer	0	0	0	animal_material	0	partly_aquatic	nematophagous	0	filamentous_mycelium	0	0	0	0	0	0
OTU0480	Acremonium	0	0.00329636	jrk06069	Ascomycota	Leotiomycetes	Helotiales	Arachnopezizaceae	Parachnopeziza		litter_saprotroph					leaf/fruit/seed		non-aquatic			filamentous_mycelium	apothecium_(hymenium_on_surface)	smooth					0	unspecified_saprotroph	foliar_endophyte	hypervariable	foliar_endophyte	leaf/fruit/seed_pathogen	leaf/fruit/seed,soil,dung,animal_material	soft_rot	partly_aquatic	0	0	filamentous_mycelium	0	0	0	0	0	0
OTU0481	Microascus	0	0.00329636	jrk01077	Ascomycota	Leotiomycetes	Helotiales	Bloxamiaceae	Bloxamia		wood_saprotroph	litter_saprotroph	plant_pathogen_two_species		leaf/fruit/seed_pathogen	wood,leaf/fruit/seed		non-aquatic			filamentous_mycelium	apothecium_(hymenium_on_surface)	smooth					0	soil_saprotroph	litter_saprotroph	0	foliar_endophyte	leaf/fruit/seed_pathogen	leaf/fruit/seed,soil	0	partly_aquatic	opportunistic_human_parasite	0	filamentous_mycelium	perithecium_(hymenium_hidden,_narrow_opening)	closed	0	0	0	0
OTU0482	Clavaria	0	0.00329636	jrk00168	Ascomycota	Leotiomycetes	Helotiales	Calloriaceae	Aivenia		litter_saprotroph					leaf/fruit/seed		non-aquatic			filamentous_mycelium	apothecium_(hymenium_on_surface)	smooth					0	soil_saprotroph	unspecified_symbiotroph	CHEGD_symbiotrophs	root-associated	root-associated	roots,soil	0	non-aquatic	0	0	filamentous_mycelium	clavarioid	smooth	0	0	0	0
OTU0483	Fungi genus Incertae sedis	0	0.00329636	jrk01320	Ascomycota	Leotiomycetes	Helotiales	Calloriaceae	Calloria		litter_saprotroph					leaf/fruit/seed		non-aquatic			filamentous_mycelium	apothecium_(hymenium_on_surface)	smooth					#N/A	#N/A	#N/A	#N/A	#N/A	#N/A	#N/A	#N/A	#N/A	#N/A	#N/A	#N/A	#N/A	#N/A	#N/A	#N/A	#N/A	#N/A
OTU0484	Exophiala	0.00168513	0	jrk01624	Ascomycota	Leotiomycetes	Helotiales	Calloriaceae	Chaetonaevia		litter_saprotroph					leaf/fruit/seed		non-aquatic			filamentous_mycelium	apothecium_(hymenium_on_surface)	smooth					0	animal_parasite	litter_saprotroph	0	root_endophyte_dark_septate	root-associated	leaf/fruit/seed,animal_material	0	partly_aquatic	animal_parasite/opportunistic_human_parasite	0	dimorphic_yeast	0	0	0	0	0	0
OTU0485	Umbelopsis	0	0.00329636	jrk02680	Ascomycota	Leotiomycetes	Helotiales	Calloriaceae	Diplonaevia		litter_saprotroph	plant_pathogen			leaf/fruit/seed_pathogen	leaf/fruit/seed		partly_freshwater_(partly_non-aquatic)			filamentous_mycelium	apothecium_(hymenium_on_surface)	smooth					0	soil_saprotroph	root-associated	0	root-associated	root-associated	roots,soil	mold	non-aquatic	0	0	filamentous_mycelium	none	none	0	0	0	0
OTU0486	Dothideomycetes genus Incertae sedis	0	0.00329636	jrk02787	Ascomycota	Leotiomycetes	Helotiales	Calloriaceae	Duebenia		litter_saprotroph					leaf/fruit/seed		non-aquatic			filamentous_mycelium	apothecium_(hymenium_on_surface)	smooth					#N/A	#N/A	#N/A	#N/A	#N/A	#N/A	#N/A	#N/A	#N/A	#N/A	#N/A	#N/A	#N/A	#N/A	#N/A	#N/A	#N/A	#N/A
OTU0487	Angustimassarina	0	0.00329636	jrk03077	Ascomycota	Leotiomycetes	Helotiales	Calloriaceae	Eupropolella		plant_pathogen				leaf/fruit/seed_pathogen			non-aquatic			filamentous_mycelium	apothecium_(hymenium_on_surface)	smooth					0	mycoparasite	wood_saprotroph	0	0	0	wood,fungal_material	0	0	0	0	filamentous_mycelium	0	0	0	0	0	0
OTU0488		0.00168513	0	jrk03940	Ascomycota	Leotiomycetes	Helotiales	Calloriaceae	Hyalacrotes		litter_saprotroph					leaf/fruit/seed		non-aquatic			filamentous_mycelium	apothecium_(hymenium_on_surface)	smooth					#N/A	#N/A	#N/A	#N/A	#N/A	#N/A	#N/A	#N/A	#N/A	#N/A	#N/A	#N/A	#N/A	#N/A	#N/A	#N/A	#N/A	#N/A
OTU0489	Glomeraceae genus Incertae sedis	0	0.00329636	jrk04172	Ascomycota	Leotiomycetes	Helotiales	Calloriaceae	Iridinea		dung_saprotroph					dung		non-aquatic			filamentous_mycelium	apothecium_(hymenium_on_surface)	smooth					#N/A	#N/A	#N/A	#N/A	#N/A	#N/A	#N/A	#N/A	#N/A	#N/A	#N/A	#N/A	#N/A	#N/A	#N/A	#N/A	#N/A	#N/A
OTU0490	Chytridiomycota genus Incertae sedis	0	0.00329636	jrk04805	Ascomycota	Leotiomycetes	Helotiales	Calloriaceae	Loricella		litter_saprotroph					leaf/fruit/seed		non-aquatic			filamentous_mycelium	apothecium_(hymenium_on_surface)	smooth					#N/A	#N/A	#N/A	#N/A	#N/A	#N/A	#N/A	#N/A	#N/A	#N/A	#N/A	#N/A	#N/A	#N/A	#N/A	#N/A	#N/A	#N/A
OTU0491	Mortierella	0	0.00329636	jrk05165	Ascomycota	Leotiomycetes	Helotiales	Calloriaceae	Micropodia		litter_saprotroph					leaf/fruit/seed		non-aquatic			filamentous_mycelium	apothecium_(hymenium_on_surface)	smooth					0	soil_saprotroph	root-associated	0	root-associated	root-associated	roots,soil	chitinolytic	partly_aquatic	opportunistic_human_parasite	0	filamentous_mycelium	none	none	0	0	0	0
OTU0492	Eurotiomycetes genus Incertae sedis	0.00168513	0	jrk05503	Ascomycota	Leotiomycetes	Helotiales	Calloriaceae	Naeviella		litter_saprotroph					leaf/fruit/seed		non-aquatic			filamentous_mycelium	apothecium_(hymenium_on_surface)	smooth					#N/A	#N/A	#N/A	#N/A	#N/A	#N/A	#N/A	#N/A	#N/A	#N/A	#N/A	#N/A	#N/A	#N/A	#N/A	#N/A	#N/A	#N/A
OTU0493	Verrucocladosporium	0	0.00329636	jrk05504	Ascomycota	Leotiomycetes	Helotiales	Calloriaceae	Naeviopsis		litter_saprotroph					leaf/fruit/seed		non-aquatic			filamentous_mycelium	apothecium_(hymenium_on_surface)	smooth					0	lichen_parasite	fungal_decomposer	0	0	0	fungal_material,algal_material	0	non-aquatic	0	0	filamentous_mycelium	none	none	0	0	0	0
OTU0494	Monoblepharidales genus Incertae sedis	0	0.00329636	jrk06784	Ascomycota	Leotiomycetes	Helotiales	Calloriaceae	Ploettnera		litter_saprotroph					leaf/fruit/seed		non-aquatic			filamentous_mycelium	apothecium_(hymenium_on_surface)	smooth					#N/A	#N/A	#N/A	#N/A	#N/A	#N/A	#N/A	#N/A	#N/A	#N/A	#N/A	#N/A	#N/A	#N/A	#N/A	#N/A	#N/A	#N/A
OTU0495	Tympanidaceae genus Incertae sedis	0.00168513	0	jrk08960	Ascomycota	Leotiomycetes	Helotiales	Calloriaceae	Tricellula		litter_saprotroph					leaf/fruit/seed		freshwater			filamentous_mycelium							#N/A	#N/A	#N/A	#N/A	#N/A	#N/A	#N/A	#N/A	#N/A	#N/A	#N/A	#N/A	#N/A	#N/A	#N/A	#N/A	#N/A	#N/A
OTU0496	Tomentella	0	0.00329636	jrk09015	Ascomycota	Leotiomycetes	Helotiales	Calloriaceae	Trichosporiella		soil_saprotroph					soil		non-aquatic			filamentous_mycelium							0	ectomycorrhizal	0	0	0	0	0	0	non-aquatic	0	0	filamentous_mycelium	corticioid	smooth	medium-distance_smooth	/tomentella-thelephora	0	0
OTU0497	Bifiguratus	0	0.00329636	jrk01518	Ascomycota	Leotiomycetes	Helotiales	Cenangiaceae	Cenangiopsis		wood_saprotroph					wood		non-aquatic			filamentous_mycelium	apothecium_(hymenium_on_surface)	smooth					0	soil_saprotroph	0	0	0	0	soil	mold	non-aquatic	0	0	filamentous_mycelium	none	none	0	0	0	0
OTU0498	Pleuroascaceae genus Incertae sedis	0	0.00329636	jrk01519	Ascomycota	Leotiomycetes	Helotiales	Cenangiaceae	Cenangium		foliar_endophyte	foliar_endophyte	plant_pathogen_some_species,litter_saprotroph_some_species	foliar_endophyte		leaf/fruit/seed		non-aquatic			filamentous_mycelium	apothecium_(hymenium_on_surface)	smooth					#N/A	#N/A	#N/A	#N/A	#N/A	#N/A	#N/A	#N/A	#N/A	#N/A	#N/A	#N/A	#N/A	#N/A	#N/A	#N/A	#N/A	#N/A
OTU0499	Eurotiomycetes genus Incertae sedis	0.00168513	0	jrk01701	Ascomycota	Leotiomycetes	Helotiales	Cenangiaceae	Chlorencoelia		wood_saprotroph	root-associated		root-associated	root-associated	wood,roots		non-aquatic			filamentous_mycelium	apothecium_(hymenium_on_surface)	smooth					#N/A	#N/A	#N/A	#N/A	#N/A	#N/A	#N/A	#N/A	#N/A	#N/A	#N/A	#N/A	#N/A	#N/A	#N/A	#N/A	#N/A	#N/A
OTU0500	Paraphoma	0.00168513	0	jrk02174	Ascomycota	Leotiomycetes	Helotiales	Cenangiaceae	Crumenulopsis		plant_pathogen				leaf/fruit/seed_pathogen			non-aquatic			filamentous_mycelium	apothecium_(hymenium_on_surface)	smooth					0	plant_pathogen	wood_saprotroph	0	no_endophytic_capacity	wood_pathogen	wood	0	partly_aquatic	0	0	filamentous_mycelium	0	0	0	0	0	0
OTU0501	Tausonia	0	0.00329636	jrk02895	Ascomycota	Leotiomycetes	Helotiales	Cenangiaceae	Encoelia		wood_saprotroph	litter_saprotroph				wood,leaf/fruit/seed		non-aquatic			filamentous_mycelium	apothecium_(hymenium_on_surface)	smooth					0	soil_saprotroph	0	0	0	0	soil	0	partly_aquatic	0	0	yeast	none	none	0	0	0	0
OTU0502	Sarea	0.00168513	0	jrk03120	Ascomycota	Leotiomycetes	Helotiales	Cenangiaceae	Fabrella		plant_pathogen	foliar_endophyte		foliar_endophyte	leaf/fruit/seed_pathogen	leaf/fruit/seed		non-aquatic		Pinaceae	filamentous_mycelium	apothecium_(hymenium_on_surface)	smooth					0	unspecified_saprotroph	0	0	0	0	0	0	0	0	0	filamentous_mycelium	apothecium_(hymenium_on_surface)	smooth	0	0	0	0
OTU0503	Cortinarius	0	0.00329636	jrk03864	Ascomycota	Leotiomycetes	Helotiales	Cenangiaceae	Heyderia		litter_saprotroph					leaf/fruit/seed		non-aquatic		Pinaceae	filamentous_mycelium	apothecium_(hymenium_on_surface)	smooth					0	ectomycorrhizal	0	0	0	0	0	0	non-aquatic	0	0	filamentous_mycelium	agaricoid	gills	medium-distance_fringe	/cortinarius	0	0
OTU0504	Oidiodendron	0.00168513	0	jrk09890	Ascomycota	Leotiomycetes	Helotiales	Cenangiaceae	Meria		plant_pathogen				leaf/fruit/seed_pathogen			non-aquatic			filamentous_mycelium							#N/A	#N/A	#N/A	#N/A	#N/A	#N/A	#N/A	#N/A	#N/A	#N/A	#N/A	#N/A	#N/A	#N/A	#N/A	#N/A	#N/A	#N/A
OTU0505	Cytospora	0.00168513	0	jrk07510	Ascomycota	Leotiomycetes	Helotiales	Cenangiaceae	Rhabdocline		plant_pathogen				leaf/fruit/seed_pathogen			non-aquatic		Pinaceae	filamentous_mycelium	apothecium_(hymenium_on_surface)	smooth					0	plant_pathogen	litter_saprotroph	0	foliar_endophyte	leaf/fruit/seed_pathogen	leaf/fruit/seed	soft_rot	partly_aquatic	0	0	filamentous_mycelium	perithecium_(hymenium_hidden,_narrow_opening)	closed	0	0	0	0
OTU0506	Bionectriaceae genus Incertae sedis	0	0.00329636	jrk07808	Ascomycota	Leotiomycetes	Helotiales	Cenangiaceae	Sarcotrochila		foliar_endophyte	litter_saprotroph		foliar_endophyte	leaf/fruit/seed_pathogen	leaf/fruit/seed		non-aquatic		Pinaceae	filamentous_mycelium	apothecium_(hymenium_on_surface)	smooth					#N/A	#N/A	#N/A	#N/A	#N/A	#N/A	#N/A	#N/A	#N/A	#N/A	#N/A	#N/A	#N/A	#N/A	#N/A	#N/A	#N/A	#N/A
OTU0507	Basidiomycota genus Incertae sedis	0.00168513	0	jrk09067	Ascomycota	Leotiomycetes	Helotiales	Cenangiaceae	Trochila		litter_saprotroph					leaf/fruit/seed		non-aquatic			filamentous_mycelium	apothecium_(hymenium_on_surface)	smooth					#N/A	#N/A	#N/A	#N/A	#N/A	#N/A	#N/A	#N/A	#N/A	#N/A	#N/A	#N/A	#N/A	#N/A	#N/A	#N/A	#N/A	#N/A
OTU0508	Fungi genus Incertae sedis	0	0.00329636	jrk09269	Ascomycota	Leotiomycetes	Helotiales	Cenangiaceae	Velutarina		wood_saprotroph	litter_saprotroph				wood,leaf/fruit/seed		non-aquatic			filamentous_mycelium	apothecium_(hymenium_on_surface)	smooth					#N/A	#N/A	#N/A	#N/A	#N/A	#N/A	#N/A	#N/A	#N/A	#N/A	#N/A	#N/A	#N/A	#N/A	#N/A	#N/A	#N/A	#N/A
OTU0509	Alternaria	0	0.00329636	jrk09319	Ascomycota	Leotiomycetes	Helotiales	Cenangiaceae	Vestigium		root_endophyte	soil_saprotroph		root_endophyte		soil		non-aquatic			filamentous_mycelium							0	plant_pathogen	litter_saprotroph	0	foliar_endophyte	leaf/fruit/seed_pathogen	leaf/fruit/seed	soft_rot	partly_aquatic	0	0	filamentous_mycelium	perithecium_(hymenium_hidden,_narrow_opening)	closed	0	0	0	0
OTU0510	Trechispora	0	0.00329636	jrk09884	Ascomycota	Leotiomycetes	Helotiales	Chaetomellaceae	Zoellneria	synonym of Chaetomella	litter_saprotroph					leaf/fruit/seed		non-aquatic			filamentous_mycelium	apothecium_(hymenium_on_surface)	smooth					0	wood_saprotroph	0	0	0	0	wood	white_rot	non-aquatic	0	0	filamentous_mycelium	corticioid	poroid	0	0	0	0
OTU0511	Umbelopsis	0	0.00329636	jrk00574	Ascomycota	Leotiomycetes	Helotiales	Dermateaceae	Arctomollisia		wood_saprotroph					wood		non-aquatic			filamentous_mycelium	apothecium_(hymenium_on_surface)	smooth					0	soil_saprotroph	root-associated	0	root-associated	root-associated	roots,soil	mold	non-aquatic	0	0	filamentous_mycelium	none	none	0	0	0	0
OTU0512	Cystobasidiomycetes genus Incertae sedis	0.00168513	0	jrk01942	Ascomycota	Leotiomycetes	Helotiales	Dermateaceae	Coleophoma		plant_pathogen	foliar_endophyte		foliar_endophyte	leaf/fruit/seed_pathogen	leaf/fruit/seed		non-aquatic			filamentous_mycelium							#N/A	#N/A	#N/A	#N/A	#N/A	#N/A	#N/A	#N/A	#N/A	#N/A	#N/A	#N/A	#N/A	#N/A	#N/A	#N/A	#N/A	#N/A
OTU0513	Varicosporellopsis	0	0.00329636	jrk02077	Ascomycota	Leotiomycetes	Helotiales	Dermateaceae	Corniculariella		wood_saprotroph					wood		non-aquatic			filamentous_mycelium							0	wood_saprotroph	0	0	0	0	wood	0	freshwater	0	0	filamentous_mycelium	0	0	0	0	0	0
OTU0514	Ascomycota genus Incertae sedis	0	0.00329636	jrk09888	Ascomycota	Leotiomycetes	Helotiales	Dermateaceae	Davidhawksworthia		litter_saprotroph					leaf/fruit/seed		non-aquatic			filamentous_mycelium							#N/A	#N/A	#N/A	#N/A	#N/A	#N/A	#N/A	#N/A	#N/A	#N/A	#N/A	#N/A	#N/A	#N/A	#N/A	#N/A	#N/A	#N/A
OTU0515	Symbiotaphrina	0.00168513	0	jrk02494	Ascomycota	Leotiomycetes	Helotiales	Dermateaceae	Dermea		plant_pathogen	litter_saprotroph			leaf/fruit/seed_pathogen	leaf/fruit/seed		non-aquatic			filamentous_mycelium	apothecium_(hymenium_on_surface)	smooth					0	animal_endosymbiont	litter_saprotroph	0	0	0	leaf/fruit/seed	0	non-aquatic	animal_endosymbiont	0	yeast	0	0	0	0	0	0
OTU0516	Fungi genus Incertae sedis	0	0.00329636	jrk03351	Ascomycota	Leotiomycetes	Helotiales	Dermateaceae	Gelatinoamylaria		litter_saprotroph					leaf/fruit/seed		non-aquatic			filamentous_mycelium							#N/A	#N/A	#N/A	#N/A	#N/A	#N/A	#N/A	#N/A	#N/A	#N/A	#N/A	#N/A	#N/A	#N/A	#N/A	#N/A	#N/A	#N/A
OTU0517	Buckleyzyma	0.00168513	0	jrk04632	Ascomycota	Leotiomycetes	Helotiales	Dermateaceae	Leptothyrium		plant_pathogen				leaf/fruit/seed_pathogen						filamentous_mycelium							0	epiphyte	litter_saprotroph	0	no_endophytic_capacity	0	leaf/fruit/seed	0	partly_aquatic	0	0	yeast	none	none	0	0	0	0
OTU0518	Naematelia	0.00168513	0	jrk05620	Ascomycota	Leotiomycetes	Helotiales	Dermateaceae	Neofabraea		plant_pathogen	litter_saprotroph		foliar_endophyte	leaf/fruit/seed_pathogen	leaf/fruit/seed		non-aquatic			filamentous_mycelium	apothecium_(hymenium_on_surface)	smooth					0	mycoparasite	fungal_decomposer	0	0	0	fungal_material	0	non-aquatic	0	0	dimorphic_yeast	tremelloid	0	0	0	0	0
OTU0519	Sporidiobolales genus Incertae sedis	0	0.00329636	jrk06096	Ascomycota	Leotiomycetes	Helotiales	Dermateaceae	Parafabraea	synonym of Coleophoma	foliar_endophyte	plant_pathogen		foliar_endophyte	leaf/fruit/seed_pathogen	leaf/fruit/seed		non-aquatic			filamentous_mycelium	apothecium_(hymenium_on_surface)	smooth					#N/A	#N/A	#N/A	#N/A	#N/A	#N/A	#N/A	#N/A	#N/A	#N/A	#N/A	#N/A	#N/A	#N/A	#N/A	#N/A	#N/A	#N/A
OTU0520	Sarocladiaceae genus Incertae sedis	0	0.00329636	jrk06333	Ascomycota	Leotiomycetes	Helotiales	Dermateaceae	Pezicula		root_endophyte	soil_saprotroph	litter_saprotroph_many_species	root_endophyte	leaf/fruit/seed_pathogen	soil		non-aquatic			filamentous_mycelium	apothecium_(hymenium_on_surface)	smooth					#N/A	#N/A	#N/A	#N/A	#N/A	#N/A	#N/A	#N/A	#N/A	#N/A	#N/A	#N/A	#N/A	#N/A	#N/A	#N/A	#N/A	#N/A
OTU0521	Chaetothyriales genus Incertae sedis	0.00168513	0	jrk06510	Ascomycota	Leotiomycetes	Helotiales	Dermateaceae	Phlyctema		plant_pathogen				leaf/fruit/seed_pathogen			non-aquatic			filamentous_mycelium							#N/A	#N/A	#N/A	#N/A	#N/A	#N/A	#N/A	#N/A	#N/A	#N/A	#N/A	#N/A	#N/A	#N/A	#N/A	#N/A	#N/A	#N/A
OTU0522	Clavaria	0	0.00329636	jrk07072	Ascomycota	Leotiomycetes	Helotiales	Dermateaceae	Pseudofabraea		plant_pathogen	litter_saprotroph			leaf/fruit/seed_pathogen	leaf/fruit/seed		non-aquatic			filamentous_mycelium							0	soil_saprotroph	unspecified_symbiotroph	CHEGD_symbiotrophs	root-associated	root-associated	roots,soil	0	non-aquatic	0	0	filamentous_mycelium	clavarioid	smooth	0	0	0	0
OTU0523	Arthrobotrys	0	0.00329636	jrk07241	Ascomycota	Leotiomycetes	Helotiales	Dermateaceae	Pseudotryblidium		wood_saprotroph	litter_saprotroph				wood,leaf/fruit/seed		non-aquatic			filamentous_mycelium	apothecium_(hymenium_on_surface)	smooth					0	animal_parasite	wood_saprotroph	0	0	0	wood,leaf/fruit/seed,soil,animal_material	0	partly_marine_(partly_non-aquatic)	nematophagous	0	filamentous_mycelium	apothecium_(hymenium_on_surface)	smooth	0	0	0	0
OTU0524	Fungi genus Incertae sedis	0.00168513	0	jrk07554	Ascomycota	Leotiomycetes	Helotiales	Dermateaceae	Rhizodermea		root_endophyte	soil_saprotroph		root_endophyte_dark_septate		soil		non-aquatic			filamentous_mycelium							#N/A	#N/A	#N/A	#N/A	#N/A	#N/A	#N/A	#N/A	#N/A	#N/A	#N/A	#N/A	#N/A	#N/A	#N/A	#N/A	#N/A	#N/A
OTU0525	Spizellomyces	0	0.00329636	jrk07860	Ascomycota	Leotiomycetes	Helotiales	Dermateaceae	Schizothyrioma		litter_saprotroph					leaf/fruit/seed		non-aquatic			filamentous_mycelium							0	pollen_saprotroph	0	0	0	0	pollen	0	partly_freshwater_(partly_non-aquatic)	0	0	zoosporic-rhizomycelial_(chytrid-like)	zoosporangium	closed	0	0	0	0
OTU0526	Cryptosporiopsis	0.000842566	0.00164818	jrk09284	Ascomycota	Leotiomycetes	Helotiales	Dermateaceae	Verkleyomyces		foliar_endophyte	litter_saprotroph		foliar_endophyte		leaf/fruit/seed		non-aquatic			filamentous_mycelium	apothecium_(hymenium_on_surface)	smooth					0	unspecified_saprotroph	0	0	0	0	0	0	non-aquatic	0	0	filamentous_mycelium	0	0	0	0	0	0
OTU0527	Capnodiales genus Incertae sedis	0	0.00329636	jrk07163	Ascomycota	Leotiomycetes	Helotiales	Drepanopezizaceae	Pseudopeziza		plant_pathogen				leaf/fruit/seed_pathogen			non-aquatic			filamentous_mycelium	apothecium_(hymenium_on_surface)	smooth					#N/A	#N/A	#N/A	#N/A	#N/A	#N/A	#N/A	#N/A	#N/A	#N/A	#N/A	#N/A	#N/A	#N/A	#N/A	#N/A	#N/A	#N/A
OTU0528	Aspergillus	0.00168513	0	jrk09866	Ascomycota	Leotiomycetes	Helotiales	Gelatinodiscaceae	Gelatinodiscus		litter_saprotroph					leaf/fruit/seed		non-aquatic			filamentous_mycelium	apothecium_(hymenium_on_surface)	smooth					0	unspecified_saprotroph	foliar_endophyte	hypervariable,_saprotroph_animal_pathogen_endophyte	foliar_endophyte	0	leaf/fruit/seed,soil,dung,animal_material	mold	partly_aquatic	animal_parasite/opportunistic_human_parasite	0	filamentous_mycelium	0	0	0	0	0	0
OTU0529	Boletales genus Incertae sedis	0	0.00329636	jrk05896	Ascomycota	Leotiomycetes	Helotiales	Gelatinodiscaceae	Ombrophila		wood_saprotroph					wood		non-aquatic			filamentous_mycelium	apothecium_(hymenium_on_surface)	smooth					#N/A	#N/A	#N/A	#N/A	#N/A	#N/A	#N/A	#N/A	#N/A	#N/A	#N/A	#N/A	#N/A	#N/A	#N/A	#N/A	#N/A	#N/A
OTU0530	Pseudeurotium	0.00168513	0	jrk01145	Ascomycota	Leotiomycetes	Helotiales	Hamatocanthoscyphaceae	Brachyalara		mycoparasite	fungal_decomposer				fungal_material		non-aquatic		Bulgaria	filamentous_mycelium	none	none					0	dung_saprotroph	soil_saprotroph	0	0	0	soil,dung	0	partly_aquatic	0	0	filamentous_mycelium	cleistothecium_(closed,_spherical)	closed	0	0	0	0
OTU0531	Leucogyrophana	0	0.00329636	jrk01770	Ascomycota	Leotiomycetes	Helotiales	Hamatocanthoscyphaceae	Ciliolarina		wood_saprotroph					wood		non-aquatic		Pinaceae	filamentous_mycelium	apothecium_(hymenium_on_surface)	smooth					0	wood_saprotroph	0	lichen_parasite_some_species	0	0	wood	brown_rot	non-aquatic	0	0	filamentous_mycelium	corticioid	other	0	0	0	0
OTU0532	Stilbella	0	0.00329636	jrk03553	Ascomycota	Leotiomycetes	Helotiales	Hamatocanthoscyphaceae	Gremmenia		plant_pathogen				leaf/fruit/seed_pathogen			partly_aquatic			filamentous_mycelium	apothecium_(hymenium_on_surface)	smooth					0	dung_saprotroph	foliar_endophyte	litter_saprotroph_some_species	foliar_endophyte	0	leaf/fruit/seed,dung	soft_rot	partly_aquatic	0	0	filamentous_mycelium	0	0	0	0	0	0
OTU0533	Fungi genus Incertae sedis	0	0.00329636	jrk03668	Ascomycota	Leotiomycetes	Helotiales	Hamatocanthoscyphaceae	Hamatocanthoscypha		wood_saprotroph	litter_saprotroph				wood,leaf/fruit/seed		non-aquatic			filamentous_mycelium	apothecium_(hymenium_on_surface)	smooth					#N/A	#N/A	#N/A	#N/A	#N/A	#N/A	#N/A	#N/A	#N/A	#N/A	#N/A	#N/A	#N/A	#N/A	#N/A	#N/A	#N/A	#N/A
OTU0534	Umbelopsis	0	0.00329636	jrk04137	Ascomycota	Leotiomycetes	Helotiales	Hamatocanthoscyphaceae	Infundichalara		litter_saprotroph					leaf/fruit/seed		non-aquatic		Pinus	filamentous_mycelium							0	soil_saprotroph	root-associated	0	root-associated	root-associated	roots,soil	mold	non-aquatic	0	0	filamentous_mycelium	none	none	0	0	0	0
OTU0535	Penicillium	0	0.00329636	jrk05170	Ascomycota	Leotiomycetes	Helotiales	Hamatocanthoscyphaceae	Microscypha		litter_saprotroph		bryophilous_one_species			leaf/fruit/seed		non-aquatic			filamentous_mycelium	apothecium_(hymenium_on_surface)	smooth					0	unspecified_saprotroph	foliar_endophyte	toxin-producing,animal_parasite_some_species,mycoparasite_some_species	foliar_endophyte	0	soil	mold	partly_aquatic	opportunistic_human_parasite	0	filamentous_mycelium	0	0	0	0	0	0
OTU0536	Spiromastix	0	0.00329636	jrk07093	Ascomycota	Leotiomycetes	Helotiales	Hamatocanthoscyphaceae	Pseudohelotium		litter_saprotroph					leaf/fruit/seed		non-aquatic			filamentous_mycelium	apothecium_(hymenium_on_surface)	smooth					0	soil_saprotroph	0	0	0	0	soil	0	non-aquatic	opportunistic_animal_parasite	0	filamentous_mycelium	cleistothecium_(closed,_spherical)	closed	0	0	0	0
OTU0537	Eurotiomycetes genus Incertae sedis	0.00168513	0	jrk09412	Ascomycota	Leotiomycetes	Helotiales	Hamatocanthoscyphaceae	Xenochalara		litter_saprotroph					leaf/fruit/seed		non-aquatic			filamentous_mycelium							#N/A	#N/A	#N/A	#N/A	#N/A	#N/A	#N/A	#N/A	#N/A	#N/A	#N/A	#N/A	#N/A	#N/A	#N/A	#N/A	#N/A	#N/A
OTU0538	Cladosporium	0.00168513	0	jrk09441	Ascomycota	Leotiomycetes	Helotiales	Hamatocanthoscyphaceae	Xenopolyscytalum		litter_saprotroph	foliar_endophyte		foliar_endophyte		leaf/fruit/seed		non-aquatic			filamentous_mycelium							0	litter_saprotroph	plant_pathogen	hypervariable	foliar_endophyte	leaf/fruit/seed_pathogen	wood,leaf/fruit/seed,soil,dung,animal_material	0	partly_aquatic	animal_parasite	0	filamentous_mycelium	perithecium_(hymenium_hidden,_narrow_opening)	closed	0	0	0	0
OTU0539	Guomyces	0.00168513	0	jrk01047	Ascomycota	Leotiomycetes	Helotiales	Helotiaceae	Bisporella		wood_saprotroph		mycoparasite_one_species			wood		partly_freshwater_(partly_non-aquatic)			filamentous_mycelium	apothecium_(hymenium_on_surface)	smooth					#N/A	#N/A	#N/A	#N/A	#N/A	#N/A	#N/A	#N/A	#N/A	#N/A	#N/A	#N/A	#N/A	#N/A	#N/A	#N/A	#N/A	#N/A
OTU0540	Microbotryomycetes genus Incertae sedis	0.00168513	0	jrk09887	Ascomycota	Leotiomycetes	Helotiales	Helotiaceae	Brunaudia		litter_saprotroph					leaf/fruit/seed		non-aquatic			filamentous_mycelium	apothecium_(hymenium_on_surface)	smooth					#N/A	#N/A	#N/A	#N/A	#N/A	#N/A	#N/A	#N/A	#N/A	#N/A	#N/A	#N/A	#N/A	#N/A	#N/A	#N/A	#N/A	#N/A
OTU0541	Chloridium	0	0.00329636	jrk01247	Ascomycota	Leotiomycetes	Helotiales	Helotiaceae	Bulgariella		wood_saprotroph					wood		non-aquatic			filamentous_mycelium	apothecium_(hymenium_on_surface)	smooth					0	litter_saprotroph	wood_saprotroph	0	root-associated	root_pathogen	wood,leaf/fruit/seed,roots,animal_material	0	partly_aquatic	opportunistic_human_parasite	0	filamentous_mycelium	none	none	0	0	0	0
OTU0542	Solicoccozyma	0	0.00329636	jrk02653	Ascomycota	Leotiomycetes	Helotiales	Helotiaceae	Dimorphospora		litter_saprotroph					leaf/fruit/seed		partly_aquatic			filamentous_mycelium							0	soil_saprotroph	epiphyte	0	0	0	soil	0	partly_aquatic	0	0	yeast	none	none	0	0	0	0
OTU0543	Mortierella	0	0.00329636	jrk03740	Ascomycota	Leotiomycetes	Helotiales	Helotiaceae	Helicodendron		litter_saprotroph					leaf/fruit/seed		partly_freshwater_(partly_non-aquatic)			filamentous_mycelium							0	soil_saprotroph	root-associated	0	root-associated	root-associated	roots,soil	chitinolytic	partly_aquatic	opportunistic_human_parasite	0	filamentous_mycelium	none	none	0	0	0	0
OTU0544	Amphinema	0	0.00329636	jrk03753	Ascomycota	Leotiomycetes	Helotiales	Helotiaceae	Helicorhoidion												filamentous_mycelium							0	ectomycorrhizal	0	0	0	0	0	0	non-aquatic	0	0	filamentous_mycelium	corticioid	smooth	medium-distance_fringe	/amphinema-tylospora	0	0
OTU0545	Thelephoraceae genus Incertae sedis	0	0.00329636	jrk05601	Ascomycota	Leotiomycetes	Helotiales	Helotiaceae	Neocrinula		litter_saprotroph					leaf/fruit/seed		non-aquatic			filamentous_mycelium	none	none					#N/A	#N/A	#N/A	#N/A	#N/A	#N/A	#N/A	#N/A	#N/A	#N/A	#N/A	#N/A	#N/A	#N/A	#N/A	#N/A	#N/A	#N/A
OTU0546	Cristinia	0	0.00329636	jrk07946	Ascomycota	Leotiomycetes	Helotiales	Helotiaceae	Scytalidium		wood_saprotroph	litter_saprotroph	animal_parasite_some_species_mycoparasite_some_species			wood,leaf/fruit/seed,soil,animal_material	soft_rot	partly_aquatic	opportunistic_human_parasite		filamentous_mycelium							0	wood_saprotroph	0	0	0	0	wood	white_rot	non-aquatic	0	0	filamentous_mycelium	corticioid	smooth	0	0	0	0
OTU0547	Eurotiomycetes genus Incertae sedis	0.00168513	0	jrk09893	Ascomycota	Leotiomycetes	Helotiales	Helotiaceae	Xylogone	synonym of Scytalidium	mycoparasite	fungal_decomposer				fungal_material		non-aquatic			filamentous_mycelium							#N/A	#N/A	#N/A	#N/A	#N/A	#N/A	#N/A	#N/A	#N/A	#N/A	#N/A	#N/A	#N/A	#N/A	#N/A	#N/A	#N/A	#N/A
OTU0548	Penicillium	0	0.00329636	jrk00069	Ascomycota	Leotiomycetes	Helotiales	Helotiales family incertae sedis	Acidea		soil_saprotroph					soil		non-aquatic			filamentous_mycelium							0	unspecified_saprotroph	foliar_endophyte	toxin-producing,animal_parasite_some_species,mycoparasite_some_species	foliar_endophyte	0	soil	mold	partly_aquatic	opportunistic_human_parasite	0	filamentous_mycelium	0	0	0	0	0	0
OTU0549	Eurotiomycetes genus Incertae sedis	0.00168513	0	jrk00071	Ascomycota	Leotiomycetes	Helotiales	Helotiales family incertae sedis	Acidomelania		root_endophyte	soil_saprotroph		root_endophyte		soil		non-aquatic			filamentous_mycelium	none	none					#N/A	#N/A	#N/A	#N/A	#N/A	#N/A	#N/A	#N/A	#N/A	#N/A	#N/A	#N/A	#N/A	#N/A	#N/A	#N/A	#N/A	#N/A
OTU0550	Entoloma	0	0.00329636	jrk00203	Ascomycota	Leotiomycetes	Helotiales	Helotiales family incertae sedis	Algincola		wood_saprotroph	algal_symbiont				wood		non-aquatic		algae	filamentous_mycelium	apothecium_(hymenium_on_surface)	smooth					0	soil_saprotroph	unspecified_symbiotroph	CHEGD_symbiotrophs,ectomycorrhizal_ca_10%_of_species	root-associated	root-associated	roots,soil	0	non-aquatic	0	0	filamentous_mycelium	agaricoid	gills	medium-distance_smooth	/entoloma	0	0
OTU0551	Curreya	0	0.00329636	jrk00386	Ascomycota	Leotiomycetes	Helotiales	Helotiales family incertae sedis	Angelina		wood_saprotroph					wood		non-aquatic			filamentous_mycelium	apothecium_(hymenium_on_surface)	smooth					#N/A	#N/A	#N/A	#N/A	#N/A	#N/A	#N/A	#N/A	#N/A	#N/A	#N/A	#N/A	#N/A	#N/A	#N/A	#N/A	#N/A	#N/A
OTU0552	Epicoccum	0.00168513	0	jrk00486	Ascomycota	Leotiomycetes	Helotiales	Helotiales family incertae sedis	Apiculospora		litter_saprotroph					leaf/fruit/seed		non-aquatic			filamentous_mycelium	none	none					0	plant_pathogen	litter_saprotroph	0	foliar_endophyte	leaf/fruit/seed_pathogen	leaf/fruit/seed	0	partly_aquatic	0	0	filamentous_mycelium	0	0	0	0	0	0
OTU0553	Akanthomyces	0.00168513	0	jrk00533	Ascomycota	Leotiomycetes	Helotiales	Helotiales family incertae sedis	Aquadiscula		litter_saprotroph					leaf/fruit/seed		partly_freshwater_(partly_non-aquatic)			filamentous_mycelium	apothecium_(hymenium_on_surface)	smooth					0	animal_parasite	animal_decomposer	0	0	0	animal_material	0	partly_aquatic	invertebrate_parasite	0	filamentous_mycelium	0	0	0	0	0	0
OTU0554	Betamyces	0	0.00329636	jrk00977	Ascomycota	Leotiomycetes	Helotiales	Helotiales family incertae sedis	Belonioscyphella		litter_saprotroph					leaf/fruit/seed		non-aquatic			filamentous_mycelium	apothecium_(hymenium_on_surface)	smooth					0	pollen_saprotroph	0	0	0	0	pollen	0	partly_freshwater_(partly_non-aquatic)	0	0	zoosporic-rhizomycelial_(chytrid-like)	zoosporangium	closed	0	0	0	0
OTU0555	Fusarium	0	0.00164818	jrk00983	Ascomycota	Leotiomycetes	Helotiales	Helotiales family incertae sedis	Benguetia		plant_pathogen				leaf/fruit/seed_pathogen			non-aquatic			filamentous_mycelium	apothecium_(hymenium_on_surface)	smooth					0	plant_pathogen	litter_saprotroph	hypervariable,_saprotroph,_pathogen,damping-off_pathogen	foliar_endophyte	leaf/fruit/seed_pathogen	leaf/fruit/seed,roots,soil,animal_material	soft_rot	partly_aquatic	opportunistic_human_parasite	0	filamentous_mycelium	0	0	0	0	0	0
OTU0556	Aspergillus	0.000842566	0	jrk01039	Ascomycota	Leotiomycetes	Helotiales	Helotiales family incertae sedis	Bioscypha		plant_pathogen				leaf/fruit/seed_pathogen			non-aquatic			filamentous_mycelium	apothecium_(hymenium_on_surface)	smooth					0	unspecified_saprotroph	foliar_endophyte	hypervariable,_saprotroph_animal_pathogen_endophyte	foliar_endophyte	0	leaf/fruit/seed,soil,dung,animal_material	mold	partly_aquatic	animal_parasite/opportunistic_human_parasite	0	filamentous_mycelium	0	0	0	0	0	0
OTU0557	Sorocybe	0.000842566	0	jrk01248	Ascomycota	Leotiomycetes	Helotiales	Helotiales family incertae sedis	Bulgariopsis		wood_saprotroph					wood		non-aquatic			filamentous_mycelium	apothecium_(hymenium_on_surface)	smooth					0	unspecified_saprotroph	resin_saprotroph	0	0	0	resins	0	non-aquatic	0	0	dimorphic_yeast	0	0	0	0	0	0
OTU0558	Hypocreales genus Incertae sedis	0	0.00164818	jrk09863	Ascomycota	Leotiomycetes	Helotiales	Helotiales family incertae sedis	Cairneyella		root_endophyte	ericoid_mycorrhizal		root_endophyte		soil		non-aquatic			filamentous_mycelium							#N/A	#N/A	#N/A	#N/A	#N/A	#N/A	#N/A	#N/A	#N/A	#N/A	#N/A	#N/A	#N/A	#N/A	#N/A	#N/A	#N/A	#N/A
OTU0559	Penicillium	0.000842566	0	jrk01351	Ascomycota	Leotiomycetes	Helotiales	Helotiales family incertae sedis	Calycellinopsis		litter_saprotroph					leaf/fruit/seed		non-aquatic			filamentous_mycelium	apothecium_(hymenium_on_surface)	smooth					0	unspecified_saprotroph	foliar_endophyte	toxin-producing,animal_parasite_some_species,mycoparasite_some_species	foliar_endophyte	0	soil	mold	partly_aquatic	opportunistic_human_parasite	0	filamentous_mycelium	0	0	0	0	0	0
OTU0560	Phialocephala	0.000842566	0	jrk01413	Ascomycota	Leotiomycetes	Helotiales	Helotiales family incertae sedis	Capillipes		litter_saprotroph					leaf/fruit/seed		non-aquatic			filamentous_mycelium	apothecium_(hymenium_on_surface)	smooth					0	soil_saprotroph	root_endophyte	0	root_endophyte_dark_septate	root-associated	roots,soil	0	non-aquatic	0	0	filamentous_mycelium	apothecium_(hymenium_on_surface)	smooth	0	0	0	0
OTU0561	Myriangiales genus Incertae sedis	0.000842566	0	jrk01429	Ascomycota	Leotiomycetes	Helotiales	Helotiales family incertae sedis	Capricola		unspecified_saprotroph							non-aquatic			filamentous_mycelium	apothecium_(hymenium_on_surface)	smooth					#N/A	#N/A	#N/A	#N/A	#N/A	#N/A	#N/A	#N/A	#N/A	#N/A	#N/A	#N/A	#N/A	#N/A	#N/A	#N/A	#N/A	#N/A
OTU0562	Hormiactis	0	0.00164818	jrk01457	Ascomycota	Leotiomycetes	Helotiales	Helotiales family incertae sedis	Cashiella		litter_saprotroph					leaf/fruit/seed		non-aquatic			filamentous_mycelium	apothecium_(hymenium_on_surface)	smooth					0	mycoparasite	fungal_decomposer	0	0	0	fungal_material	0	0	0	0	filamentous_mycelium	0	0	0	0	0	0
OTU0563	Penicillium	0	0.00164818	jrk01509	Ascomycota	Leotiomycetes	Helotiales	Helotiales family incertae sedis	Cejpia		litter_saprotroph					leaf/fruit/seed		non-aquatic			filamentous_mycelium	apothecium_(hymenium_on_surface)	smooth					0	unspecified_saprotroph	foliar_endophyte	toxin-producing,animal_parasite_some_species,mycoparasite_some_species	foliar_endophyte	0	soil	mold	partly_aquatic	opportunistic_human_parasite	0	filamentous_mycelium	0	0	0	0	0	0
OTU0564	Zygoascus	0.000842566	0	jrk01520	Ascomycota	Leotiomycetes	Helotiales	Helotiales family incertae sedis	Cenangiumella		litter_saprotroph					leaf/fruit/seed		non-aquatic			filamentous_mycelium	apothecium_(hymenium_on_surface)	smooth					0	nectar/tap_saprotroph	0	0	0	0	sugar-rich_substrates	0	partly_aquatic	opportunistic_human_parasite	0	yeast	none	none	0	0	0	0
OTU0565	Cuniculitremaceae genus Incertae sedis	0	0.00164818	jrk01704	Ascomycota	Leotiomycetes	Helotiales	Helotiales family incertae sedis	Chloroepilichen		lichen_parasite	fungal_decomposer				fungal_material,algal_material		non-aquatic			filamentous_mycelium	apothecium_(hymenium_on_surface)	smooth					#N/A	#N/A	#N/A	#N/A	#N/A	#N/A	#N/A	#N/A	#N/A	#N/A	#N/A	#N/A	#N/A	#N/A	#N/A	#N/A	#N/A	#N/A
OTU0566		0	0.00164818	jrk01709	Ascomycota	Leotiomycetes	Helotiales	Helotiales family incertae sedis	Chlorospleniella		litter_saprotroph	plant_pathogen	plant_pathogen_weak		leaf/fruit/seed_pathogen	leaf/fruit/seed		non-aquatic			filamentous_mycelium	apothecium_(hymenium_on_surface)	smooth					#N/A	#N/A	#N/A	#N/A	#N/A	#N/A	#N/A	#N/A	#N/A	#N/A	#N/A	#N/A	#N/A	#N/A	#N/A	#N/A	#N/A	#N/A
OTU0567	Chaetothyriales genus Incertae sedis	0	0.00164818	jrk01716	Ascomycota	Leotiomycetes	Helotiales	Helotiales family incertae sedis	Chondroderris		litter_saprotroph					leaf/fruit/seed		non-aquatic			filamentous_mycelium	apothecium_(hymenium_on_surface)	smooth					#N/A	#N/A	#N/A	#N/A	#N/A	#N/A	#N/A	#N/A	#N/A	#N/A	#N/A	#N/A	#N/A	#N/A	#N/A	#N/A	#N/A	#N/A
OTU0568	Coniothyrium	0.000842566	0	jrk01766	Ascomycota	Leotiomycetes	Helotiales	Helotiales family incertae sedis	Ciliella		litter_saprotroph	foliar_endophyte		foliar_endophyte		leaf/fruit/seed		non-aquatic		Orchidaceae	filamentous_mycelium							0	plant_pathogen	litter_saprotroph	mycoparasite_some_species	0	leaf/fruit/seed_pathogen	leaf/fruit/seed,wood	soft_rot	partly_aquatic	0	0	filamentous_mycelium	0	0	0	0	0	0
OTU0569		0	0.00164818	jrk01793	Ascomycota	Leotiomycetes	Helotiales	Helotiales family incertae sedis	Cistella		wood_saprotroph	litter_saprotroph		foliar_endophyte		wood,leaf/fruit/seed		partly_freshwater_(partly_non-aquatic)			filamentous_mycelium	apothecium_(hymenium_on_surface)	smooth					#N/A	#N/A	#N/A	#N/A	#N/A	#N/A	#N/A	#N/A	#N/A	#N/A	#N/A	#N/A	#N/A	#N/A	#N/A	#N/A	#N/A	#N/A
OTU0570	Penicillium	0.000842566	0	jrk01947	Ascomycota	Leotiomycetes	Helotiales	Helotiales family incertae sedis	Coleosperma		litter_saprotroph					leaf/fruit/seed		partly_freshwater_(partly_non-aquatic)			filamentous_mycelium	apothecium_(hymenium_on_surface)	smooth					0	unspecified_saprotroph	foliar_endophyte	toxin-producing,animal_parasite_some_species,mycoparasite_some_species	foliar_endophyte	0	soil	mold	partly_aquatic	opportunistic_human_parasite	0	filamentous_mycelium	0	0	0	0	0	0
OTU0571	Sorocybe	0.000842566	0	jrk01984	Ascomycota	Leotiomycetes	Helotiales	Helotiales family incertae sedis	Comesia		unspecified_saprotroph							non-aquatic			filamentous_mycelium	apothecium_(hymenium_on_surface)	smooth					0	unspecified_saprotroph	resin_saprotroph	0	0	0	resins	0	non-aquatic	0	0	dimorphic_yeast	0	0	0	0	0	0
OTU0572	Aspergillus	0.000842566	0	jrk02080	Ascomycota	Leotiomycetes	Helotiales	Helotiales family incertae sedis	Cornuntum		unspecified_saprotroph							non-aquatic			filamentous_mycelium	apothecium_(hymenium_on_surface)	smooth					0	unspecified_saprotroph	foliar_endophyte	hypervariable,_saprotroph_animal_pathogen_endophyte	foliar_endophyte	0	leaf/fruit/seed,soil,dung,animal_material	mold	partly_aquatic	animal_parasite/opportunistic_human_parasite	0	filamentous_mycelium	0	0	0	0	0	0
OTU0573	Triscelophorus	0	0.00164818	jrk02086	Ascomycota	Leotiomycetes	Helotiales	Helotiales family incertae sedis	Coronellaria		litter_saprotroph					leaf/fruit/seed		partly_freshwater_(partly_non-aquatic)			filamentous_mycelium	apothecium_(hymenium_on_surface)	smooth					0	foliar_endophyte	litter_saprotroph	0	foliar_endophyte	0	leaf/fruit/seed	0	non-aquatic	0	0	filamentous_mycelium	0	0	0	0	0	0
OTU0574	Histoplasma	0.000842566	0	jrk02155	Ascomycota	Leotiomycetes	Helotiales	Helotiales family incertae sedis	Criserosphaeria		unspecified_saprotroph							non-aquatic			filamentous_mycelium	apothecium_(hymenium_on_surface)	smooth					0	animal_parasite	soil_saprotroph	0	0	0	soil,animal_material	0	non-aquatic	opportunistic_human_parasite	0	dimorphic_yeast	cleistothecium_(closed,_spherical)	closed	0	0	0	0
OTU0575	Aspergillus	0	0.00164818	jrk02160	Ascomycota	Leotiomycetes	Helotiales	Helotiales family incertae sedis	Crocicreas		litter_saprotroph					leaf/fruit/seed		partly_freshwater_(partly_non-aquatic)			filamentous_mycelium	apothecium_(hymenium_on_surface)	smooth					0	unspecified_saprotroph	foliar_endophyte	hypervariable,_saprotroph_animal_pathogen_endophyte	foliar_endophyte	0	leaf/fruit/seed,soil,dung,animal_material	mold	partly_aquatic	animal_parasite/opportunistic_human_parasite	0	filamentous_mycelium	0	0	0	0	0	0
OTU0576	Gymnoascus	0.000842566	0	jrk02167	Ascomycota	Leotiomycetes	Helotiales	Helotiales family incertae sedis	Crucellisporium		litter_saprotroph	plant_pathogen	plant_pathogen_weak		leaf/fruit/seed_pathogen	leaf/fruit/seed		non-aquatic			filamentous_mycelium							0	soil_saprotroph	0	0	0	0	soil	0	non-aquatic	0	0	filamentous_mycelium	cleistothecium_(closed,_spherical)	closed	0	0	0	0
OTU0577	Verrucaria	0	0.00164818	jrk02173	Ascomycota	Leotiomycetes	Helotiales	Helotiales family incertae sedis	Crumenella		litter_saprotroph					leaf/fruit/seed		non-aquatic			filamentous_mycelium	apothecium_(hymenium_on_surface)	smooth					0	lichenized	0	0	0	0	0	0	partly_aquatic	0	0	thallus_photosynthetic	0	0	0	0	chlorococcoid	0
OTU0578	Penicillium	0.000842566	0	jrk02197	Ascomycota	Leotiomycetes	Helotiales	Helotiales family incertae sedis	Cryptohymenium		soil_saprotroph					soil		non-aquatic			filamentous_mycelium	apothecium_(hymenium_on_surface)	smooth					0	unspecified_saprotroph	foliar_endophyte	toxin-producing,animal_parasite_some_species,mycoparasite_some_species	foliar_endophyte	0	soil	mold	partly_aquatic	opportunistic_human_parasite	0	filamentous_mycelium	0	0	0	0	0	0
OTU0579	Acremonium	0	0.00164818	jrk02212	Ascomycota	Leotiomycetes	Helotiales	Helotiales family incertae sedis	Cryptopezia		unspecified_saprotroph	fungal_decomposer				fungal_material		non-aquatic			filamentous_mycelium	apothecium_(hymenium_on_surface)	smooth					0	unspecified_saprotroph	foliar_endophyte	hypervariable	foliar_endophyte	leaf/fruit/seed_pathogen	leaf/fruit/seed,soil,dung,animal_material	soft_rot	partly_aquatic	0	0	filamentous_mycelium	0	0	0	0	0	0
OTU0580	Arcuadendron	0	0.00164818	jrk02376	Ascomycota	Leotiomycetes	Helotiales	Helotiales family incertae sedis	Dactylaria		animal_parasite	wood_saprotroph				wood,leaf/fruit/seed,soil,animal_material		partly_aquatic	nematophagous		filamentous_mycelium	apothecium_(hymenium_on_surface)	smooth					0	animal_parasite	animal_decomposer	0	0	0	animal_material	0	0	animal_parasite	0	0	0	0	0	0	0	0
OTU0581	Microdiplodia	0	0.00164818	jrk02408	Ascomycota	Leotiomycetes	Helotiales	Helotiales family incertae sedis	Dawsicola		litter_saprotroph	bryophilous				leaf/fruit/seed		non-aquatic			filamentous_mycelium	apothecium_(hymenium_on_surface)	smooth					0	plant_pathogen	litter_saprotroph	0	0	leaf/fruit/seed_pathogen	leaf/fruit/seed	0	non-aquatic	0	0	filamentous_mycelium	0	0	0	0	0	0
OTU0582	Penicillium	0.000842566	0	jrk02488	Ascomycota	Leotiomycetes	Helotiales	Helotiales family incertae sedis	Dermateopsis		wood_saprotroph					wood		non-aquatic			filamentous_mycelium	apothecium_(hymenium_on_surface)	smooth					0	unspecified_saprotroph	foliar_endophyte	toxin-producing,animal_parasite_some_species,mycoparasite_some_species	foliar_endophyte	0	soil	mold	partly_aquatic	opportunistic_human_parasite	0	filamentous_mycelium	0	0	0	0	0	0
OTU0583	Pyrenochaeta	0	0.00164818	jrk02605	Ascomycota	Leotiomycetes	Helotiales	Helotiales family incertae sedis	Didonia		wood_saprotroph	litter_saprotroph				wood,leaf/fruit/seed		non-aquatic			filamentous_mycelium	apothecium_(hymenium_on_surface)	smooth					0	wood_saprotroph	0	0	0	0	wood	soft_rot	0	0	0	filamentous_mycelium	0	0	0	0	0	0
OTU0584	Talaromyces	0	0.00164818	jrk02606	Ascomycota	Leotiomycetes	Helotiales	Helotiales family incertae sedis	Didymascella		plant_pathogen				leaf/fruit/seed_pathogen			non-aquatic			filamentous_mycelium	apothecium_(hymenium_on_surface)	smooth					0	unspecified_saprotroph	0	hyperviariable,_thermophile,_some_species_animal_parasite_some_species_various_saprotrophs	0	0	leaf/fruit/seed,soil,animal_material	mold	partly_aquatic	opportunistic_human_parasite	0	filamentous_mycelium	0	0	0	0	0	0
OTU0585	Sorocybe	0.000842566	0	jrk02708	Ascomycota	Leotiomycetes	Helotiales	Helotiales family incertae sedis	Discomycella		litter_saprotroph					leaf/fruit/seed		non-aquatic			filamentous_mycelium	apothecium_(hymenium_on_surface)	smooth					0	unspecified_saprotroph	resin_saprotroph	0	0	0	resins	0	non-aquatic	0	0	dimorphic_yeast	0	0	0	0	0	0
OTU0586	Kalmusia	0	0.00164818	jrk02795	Ascomycota	Leotiomycetes	Helotiales	Helotiales family incertae sedis	Durella		wood_saprotroph					wood		non-aquatic			filamentous_mycelium	apothecium_(hymenium_on_surface)	smooth					0	wood_saprotroph	0	0	no_endophytic_capacity	0	wood	0	non-aquatic	0	0	filamentous_mycelium	perithecium_(hymenium_hidden,_narrow_opening)	closed	0	0	0	0
OTU0587	Furcasterigmium	0	0.00164818	jrk02827	Ascomycota	Leotiomycetes	Helotiales	Helotiales family incertae sedis	Echinodiscus		lichen_parasite	fungal_decomposer				fungal_material,algal_material		non-aquatic			filamentous_mycelium	apothecium_(hymenium_on_surface)	smooth					#N/A	#N/A	#N/A	#N/A	#N/A	#N/A	#N/A	#N/A	#N/A	#N/A	#N/A	#N/A	#N/A	#N/A	#N/A	#N/A	#N/A	#N/A
OTU0588	Penicillium	0	0.00164818	jrk02997	Ascomycota	Leotiomycetes	Helotiales	Helotiales family incertae sedis	Episclerotium		mycoparasite	fungal_decomposer				fungal_material		non-aquatic			filamentous_mycelium	apothecium_(hymenium_on_surface)	smooth					0	unspecified_saprotroph	foliar_endophyte	toxin-producing,animal_parasite_some_species,mycoparasite_some_species	foliar_endophyte	0	soil	mold	partly_aquatic	opportunistic_human_parasite	0	filamentous_mycelium	0	0	0	0	0	0
OTU0589	Pseudopithomyces	0.000842566	0	jrk03017	Ascomycota	Leotiomycetes	Helotiales	Helotiales family incertae sedis	Erikssonopsis		litter_saprotroph					leaf/fruit/seed		non-aquatic			filamentous_mycelium	apothecium_(hymenium_on_surface)	smooth					0	plant_pathogen	litter_saprotroph	0	no_endophytic_capacity	leaf/fruit/seed_pathogen	leaf/fruit/seed	0	partly_aquatic	0	0	filamentous_mycelium	thyrothecium_(tiny_flattened_disc,_aperture_in_the_middle)	closed	0	0	0	0
OTU0590	Blastobotrys	0.000842566	0	jrk03268	Ascomycota	Leotiomycetes	Helotiales	Helotiales family incertae sedis	Fulvoflamma		plant_pathogen	litter_saprotroph			leaf/fruit/seed_pathogen	leaf/fruit/seed		non-aquatic			filamentous_mycelium	none	none					0	nectar/tap_saprotroph	0	0	0	0	sugar-rich_substrates	0	partly_aquatic	animal-associated	0	yeast	none	none	0	0	0	0
OTU0591	Sarea	0.000842566	0	jrk03453	Ascomycota	Leotiomycetes	Helotiales	Helotiales family incertae sedis	Gloeopeziza		plant_pathogen	bryophilous			leaf/fruit/seed_pathogen	leaf/fruit/seed		non-aquatic		mosses	filamentous_mycelium	apothecium_(hymenium_on_surface)	smooth					0	unspecified_saprotroph	0	0	0	0	0	0	0	0	0	filamentous_mycelium	apothecium_(hymenium_on_surface)	smooth	0	0	0	0
OTU0592	Sorocybe	0.000842566	0	jrk03496	Ascomycota	Leotiomycetes	Helotiales	Helotiales family incertae sedis	Godroniopsis		plant_pathogen				leaf/fruit/seed_pathogen			non-aquatic			filamentous_mycelium	apothecium_(hymenium_on_surface)	smooth					0	unspecified_saprotroph	resin_saprotroph	0	0	0	resins	0	non-aquatic	0	0	dimorphic_yeast	0	0	0	0	0	0
OTU0593	Sorocybe	0.000842566	0	jrk03522	Ascomycota	Leotiomycetes	Helotiales	Helotiales family incertae sedis	Gorgoniceps		wood_saprotroph					wood		partly_freshwater_(partly_non-aquatic)			filamentous_mycelium	apothecium_(hymenium_on_surface)	smooth					0	unspecified_saprotroph	resin_saprotroph	0	0	0	resins	0	non-aquatic	0	0	dimorphic_yeast	0	0	0	0	0	0
OTU0594	Dothiorella	0	0.00164818	jrk03557	Ascomycota	Leotiomycetes	Helotiales	Helotiales family incertae sedis	Grimmicola		plant_pathogen				leaf/fruit/seed_pathogen			non-aquatic		mosses	filamentous_mycelium	apothecium_(hymenium_on_surface)	smooth					0	plant_pathogen	litter_saprotroph	0	foliar_endophyte	leaf/fruit/seed_pathogen	leaf/fruit/seed	0	non-aquatic	0	0	filamentous_mycelium	0	0	0	0	0	0
OTU0595	Eurotiomycetes genus Incertae sedis	0.000842566	0	jrk03565	Ascomycota	Leotiomycetes	Helotiales	Helotiales family incertae sedis	Grovesia		wood_saprotroph					wood		non-aquatic			filamentous_mycelium	apothecium_(hymenium_on_surface)	smooth					#N/A	#N/A	#N/A	#N/A	#N/A	#N/A	#N/A	#N/A	#N/A	#N/A	#N/A	#N/A	#N/A	#N/A	#N/A	#N/A	#N/A	#N/A
OTU0596	Eurotiomycetes genus Incertae sedis	0.000842566	0	jrk03935	Ascomycota	Leotiomycetes	Helotiales	Helotiales family incertae sedis	Humicolopsis		soil_saprotroph					soil		non-aquatic			filamentous_mycelium	none	none					#N/A	#N/A	#N/A	#N/A	#N/A	#N/A	#N/A	#N/A	#N/A	#N/A	#N/A	#N/A	#N/A	#N/A	#N/A	#N/A	#N/A	#N/A
OTU0597	Fungi genus Incertae sedis	0	0.00164818	jrk04010	Ascomycota	Leotiomycetes	Helotiales	Helotiales family incertae sedis	Hymenobolus		litter_saprotroph					leaf/fruit/seed		non-aquatic			filamentous_mycelium	apothecium_(hymenium_on_surface)	smooth					#N/A	#N/A	#N/A	#N/A	#N/A	#N/A	#N/A	#N/A	#N/A	#N/A	#N/A	#N/A	#N/A	#N/A	#N/A	#N/A	#N/A	#N/A
OTU0598	Fungi genus Incertae sedis	0	0.00164818	jrk04040	Ascomycota	Leotiomycetes	Helotiales	Helotiales family incertae sedis	Hyphoscypha		wood_saprotroph					wood		non-aquatic			filamentous_mycelium	apothecium_(hymenium_on_surface)	smooth					#N/A	#N/A	#N/A	#N/A	#N/A	#N/A	#N/A	#N/A	#N/A	#N/A	#N/A	#N/A	#N/A	#N/A	#N/A	#N/A	#N/A	#N/A
OTU0599	Eurotiomycetes genus Incertae sedis	0.000842566	0	jrk04085	Ascomycota	Leotiomycetes	Helotiales	Helotiales family incertae sedis	Hysteronaevia		litter_saprotroph					leaf/fruit/seed		partly_freshwater_(partly_non-aquatic)		monocots	filamentous_mycelium	apothecium_(hymenium_on_surface)	smooth					#N/A	#N/A	#N/A	#N/A	#N/A	#N/A	#N/A	#N/A	#N/A	#N/A	#N/A	#N/A	#N/A	#N/A	#N/A	#N/A	#N/A	#N/A
OTU0600	Neophaeomoniella	0.000842566	0	jrk04088	Ascomycota	Leotiomycetes	Helotiales	Helotiales family incertae sedis	Hysteropezizella		litter_saprotroph					leaf/fruit/seed		partly_freshwater_(partly_non-aquatic)		monocots	filamentous_mycelium	apothecium_(hymenium_on_surface)	smooth					0	plant_pathogen	0	0	0	leaf/fruit/seed_pathogen	0	0	non-aquatic	0	0	filamentous_mycelium	0	0	0	0	0	0
OTU0601	Sorocybe	0.000842566	0	jrk04091	Ascomycota	Leotiomycetes	Helotiales	Helotiales family incertae sedis	Hysterostegiella		litter_saprotroph					leaf/fruit/seed		non-aquatic			filamentous_mycelium	apothecium_(hymenium_on_surface)	smooth					0	unspecified_saprotroph	resin_saprotroph	0	0	0	resins	0	non-aquatic	0	0	dimorphic_yeast	0	0	0	0	0	0
OTU0602	Lophiotrema	0	0.00164818	jrk04161	Ascomycota	Leotiomycetes	Helotiales	Helotiales family incertae sedis	Involucroscypha		wood_saprotroph					wood		non-aquatic			filamentous_mycelium	apothecium_(hymenium_on_surface)	smooth					0	wood_saprotroph	0	0	no_endophytic_capacity	0	wood	0	partly_aquatic	0	0	filamentous_mycelium	perithecium_(hymenium_hidden,_narrow_opening)	closed	0	0	0	0
OTU0603	Penicillium	0	0.00164818	jrk04205	Ascomycota	Leotiomycetes	Helotiales	Helotiales family incertae sedis	Jacobsonia		wood_saprotroph					wood		non-aquatic			filamentous_mycelium	apothecium_(hymenium_on_surface)	smooth					0	unspecified_saprotroph	foliar_endophyte	toxin-producing,animal_parasite_some_species,mycoparasite_some_species	foliar_endophyte	0	soil	mold	partly_aquatic	opportunistic_human_parasite	0	filamentous_mycelium	0	0	0	0	0	0
OTU0604	Knufia	0	0.00164818	jrk04367	Ascomycota	Leotiomycetes	Helotiales	Helotiales family incertae sedis	Korfia		litter_saprotroph					leaf/fruit/seed		non-aquatic			filamentous_mycelium	apothecium_(hymenium_on_surface)	smooth					0	soil_saprotroph	rock-inhabiting	0	0	leaf/fruit/seed_pathogen	leaf/fruit/seed,soil,animal_material	0	partly_aquatic	opportunistic_animal_parasite	0	dimorphic_yeast	0	0	0	0	0	0
OTU0605	Phialocephala	0.000842566	0	jrk04437	Ascomycota	Leotiomycetes	Helotiales	Helotiales family incertae sedis	Laetinaevia		litter_saprotroph					leaf/fruit/seed		non-aquatic			filamentous_mycelium	apothecium_(hymenium_on_surface)	smooth					0	soil_saprotroph	root_endophyte	0	root_endophyte_dark_septate	root-associated	roots,soil	0	non-aquatic	0	0	filamentous_mycelium	apothecium_(hymenium_on_surface)	smooth	0	0	0	0
OTU0606	Podospora	0	0.00164818	jrk04495	Ascomycota	Leotiomycetes	Helotiales	Helotiales family incertae sedis	Lasseria		wood_saprotroph					wood		non-aquatic			filamentous_mycelium	apothecium_(hymenium_on_surface)	smooth					0	dung_saprotroph	foliar_endophyte	litter_saprotroph_some_species	foliar_endophyte	0	leaf/fruit/seed,dung	0	partly_freshwater_(partly_non-aquatic)	0	0	filamentous_mycelium	perithecium_(hymenium_hidden,_narrow_opening)	closed	0	0	0	0
OTU0607	Saccharomycetales genus Incertae sedis	0.000842566	0	jrk04577	Ascomycota	Leotiomycetes	Helotiales	Helotiales family incertae sedis	Leohumicola		soil_saprotroph	ericoid_mycorrhizal		root_endophyte_dark_septate	root-associated	soil,roots		non-aquatic			filamentous_mycelium	none	none					#N/A	#N/A	#N/A	#N/A	#N/A	#N/A	#N/A	#N/A	#N/A	#N/A	#N/A	#N/A	#N/A	#N/A	#N/A	#N/A	#N/A	#N/A
OTU0608	Geoglossum	0	0.00164818	jrk04751	Ascomycota	Leotiomycetes	Helotiales	Helotiales family incertae sedis	Livia		unspecified_saprotroph							non-aquatic			filamentous_mycelium	apothecium_(hymenium_on_surface)	smooth					0	soil_saprotroph	unspecified_symbiotroph	CHEGD_symbiotrophs	root-associated	root-associated	roots,soil	0	non-aquatic	0	0	filamentous_mycelium	clavarioid	smooth	0	0	0	0
OTU0609	Acremonium	0	0.00164818	jrk04955	Ascomycota	Leotiomycetes	Helotiales	Helotiales family incertae sedis	Masseea		wood_saprotroph					wood		non-aquatic			filamentous_mycelium	apothecium_(hymenium_on_surface)	smooth					0	unspecified_saprotroph	foliar_endophyte	hypervariable	foliar_endophyte	leaf/fruit/seed_pathogen	leaf/fruit/seed,soil,dung,animal_material	soft_rot	partly_aquatic	0	0	filamentous_mycelium	0	0	0	0	0	0
OTU0610	Phaeomoniella	0.000842566	0	jrk05029	Ascomycota	Leotiomycetes	Helotiales	Helotiales family incertae sedis	Melanopeziza									non-aquatic			filamentous_mycelium	apothecium_(hymenium_on_surface)	smooth					0	plant_pathogen	0	0	0	leaf/fruit/seed_pathogen	0	0	non-aquatic	0	0	dimorphic_yeast	0	0	0	0	0	0
OTU0611	Sorocybe	0.000842566	0	jrk05144	Ascomycota	Leotiomycetes	Helotiales	Helotiales family incertae sedis	Microdiscus		wood_saprotroph					wood		non-aquatic			filamentous_mycelium	apothecium_(hymenium_on_surface)	smooth					0	unspecified_saprotroph	resin_saprotroph	0	0	0	resins	0	non-aquatic	0	0	dimorphic_yeast	0	0	0	0	0	0
OTU0612	Neodevriesia	0.000842566	0	jrk05265	Ascomycota	Leotiomycetes	Helotiales	Helotiales family incertae sedis	Monochaetiellopsis		litter_saprotroph					leaf/fruit/seed		non-aquatic			filamentous_mycelium							0	plant_pathogen	litter_saprotroph	0	0	leaf/fruit/seed_pathogen	leaf/fruit/seed	0	partly_aquatic	0	0	filamentous_mycelium	perithecium_(hymenium_hidden,_narrow_opening)	closed	0	0	0	0
OTU0613	Blumeria	0	0.00164818	jrk05368	Ascomycota	Leotiomycetes	Helotiales	Helotiales family incertae sedis	Mycoarthris		litter_saprotroph					leaf/fruit/seed		non-aquatic			filamentous_mycelium	none	none					0	plant_pathogen	0	0	0	leaf/fruit/seed_pathogen	0	0	non-aquatic	0	0	filamentous_mycelium	chasmothecium_(tiny_initially_closed_ascome_rupture_opening)_	closed	0	0	0	0
OTU0614	Eurotiomycetes genus Incertae sedis	0.000842566	0	jrk05417	Ascomycota	Leotiomycetes	Helotiales	Helotiales family incertae sedis	Mycosphaerangium		wood_saprotroph					wood		non-aquatic			filamentous_mycelium	apothecium_(hymenium_on_surface)	smooth					#N/A	#N/A	#N/A	#N/A	#N/A	#N/A	#N/A	#N/A	#N/A	#N/A	#N/A	#N/A	#N/A	#N/A	#N/A	#N/A	#N/A	#N/A
OTU0615	Penicillium	0.000842566	0	jrk05831	Ascomycota	Leotiomycetes	Helotiales	Helotiales family incertae sedis	Obconicum		litter_saprotroph					leaf/fruit/seed		non-aquatic			filamentous_mycelium	apothecium_(hymenium_on_surface)	smooth					0	unspecified_saprotroph	foliar_endophyte	toxin-producing,animal_parasite_some_species,mycoparasite_some_species	foliar_endophyte	0	soil	mold	partly_aquatic	opportunistic_human_parasite	0	filamentous_mycelium	0	0	0	0	0	0
OTU0616	Eurotiomycetes genus Incertae sedis	0.000842566	0	jrk05840	Ascomycota	Leotiomycetes	Helotiales	Helotiales family incertae sedis	Obscurodiscus		litter_saprotroph					leaf/fruit/seed		non-aquatic			filamentous_mycelium	apothecium_(hymenium_on_surface)	smooth					#N/A	#N/A	#N/A	#N/A	#N/A	#N/A	#N/A	#N/A	#N/A	#N/A	#N/A	#N/A	#N/A	#N/A	#N/A	#N/A	#N/A	#N/A
OTU0617	Penicillium	0.000842566	0	jrk05948	Ascomycota	Leotiomycetes	Helotiales	Helotiales family incertae sedis	Orbiliopsis		plant_pathogen				leaf/fruit/seed_pathogen			non-aquatic			filamentous_mycelium	apothecium_(hymenium_on_surface)	smooth					0	unspecified_saprotroph	foliar_endophyte	toxin-producing,animal_parasite_some_species,mycoparasite_some_species	foliar_endophyte	0	soil	mold	partly_aquatic	opportunistic_human_parasite	0	filamentous_mycelium	0	0	0	0	0	0
OTU0618	Sorocybe	0.000842566	0	jrk06202	Ascomycota	Leotiomycetes	Helotiales	Helotiales family incertae sedis	Parencoelia		litter_saprotroph	fungal_decomposer				leaf/fruit/seed,fungal_material		non-aquatic			filamentous_mycelium	apothecium_(hymenium_on_surface)	smooth					0	unspecified_saprotroph	resin_saprotroph	0	0	0	resins	0	non-aquatic	0	0	dimorphic_yeast	0	0	0	0	0	0
OTU0619	Eurotiomycetes genus Incertae sedis	0.000842566	0	jrk06274	Ascomycota	Leotiomycetes	Helotiales	Helotiales family incertae sedis	Peltigeromyces		wood_saprotroph					wood		non-aquatic			filamentous_mycelium	apothecium_(hymenium_on_surface)	smooth					#N/A	#N/A	#N/A	#N/A	#N/A	#N/A	#N/A	#N/A	#N/A	#N/A	#N/A	#N/A	#N/A	#N/A	#N/A	#N/A	#N/A	#N/A
OTU0620	Eurotiomycetes genus Incertae sedis	0.000842566	0	jrk06335	Ascomycota	Leotiomycetes	Helotiales	Helotiales family incertae sedis	Pezolepis		plant_pathogen				leaf/fruit/seed_pathogen			non-aquatic			filamentous_mycelium	apothecium_(hymenium_on_surface)	smooth					#N/A	#N/A	#N/A	#N/A	#N/A	#N/A	#N/A	#N/A	#N/A	#N/A	#N/A	#N/A	#N/A	#N/A	#N/A	#N/A	#N/A	#N/A
OTU0621	Eurotiomycetes genus Incertae sedis	0.000842566	0	jrk06337	Ascomycota	Leotiomycetes	Helotiales	Helotiales family incertae sedis	Pezomela		plant_pathogen				leaf/fruit/seed_pathogen			non-aquatic			filamentous_mycelium	apothecium_(hymenium_on_surface)	smooth					#N/A	#N/A	#N/A	#N/A	#N/A	#N/A	#N/A	#N/A	#N/A	#N/A	#N/A	#N/A	#N/A	#N/A	#N/A	#N/A	#N/A	#N/A
OTU0622	Eurotiomycetes genus Incertae sedis	0.000842566	0	jrk06390	Ascomycota	Leotiomycetes	Helotiales	Helotiales family incertae sedis	Phaeofabraea		litter_saprotroph	plant_pathogen			leaf/fruit/seed_pathogen	leaf/fruit/seed		non-aquatic			filamentous_mycelium	apothecium_(hymenium_on_surface)	smooth					#N/A	#N/A	#N/A	#N/A	#N/A	#N/A	#N/A	#N/A	#N/A	#N/A	#N/A	#N/A	#N/A	#N/A	#N/A	#N/A	#N/A	#N/A
OTU0623	Eurotiomycetes genus Incertae sedis	0.000842566	0	jrk06740	Ascomycota	Leotiomycetes	Helotiales	Helotiales family incertae sedis	Pleoscutula		lichen_parasite	fungal_decomposer				fungal_material,algal_material		non-aquatic			filamentous_mycelium	apothecium_(hymenium_on_surface)	smooth					#N/A	#N/A	#N/A	#N/A	#N/A	#N/A	#N/A	#N/A	#N/A	#N/A	#N/A	#N/A	#N/A	#N/A	#N/A	#N/A	#N/A	#N/A
OTU0624	Eurotiomycetes genus Incertae sedis	0.000842566	0	jrk06806	Ascomycota	Leotiomycetes	Helotiales	Helotiales family incertae sedis	Podophacidium		litter_saprotroph					leaf/fruit/seed		non-aquatic			filamentous_mycelium	apothecium_(hymenium_on_surface)	smooth					#N/A	#N/A	#N/A	#N/A	#N/A	#N/A	#N/A	#N/A	#N/A	#N/A	#N/A	#N/A	#N/A	#N/A	#N/A	#N/A	#N/A	#N/A
OTU0625	Sarea	0.000842566	0	jrk01164	Ascomycota	Leotiomycetes	Helotiales	Helotiales family incertae sedis	Polydesmia		wood_saprotroph	fungal_decomposer	lichen_parasite_some_species			wood,fungal_material		non-aquatic			filamentous_mycelium	apothecium_(hymenium_on_surface)	smooth					0	unspecified_saprotroph	0	0	0	0	0	0	0	0	0	filamentous_mycelium	apothecium_(hymenium_on_surface)	smooth	0	0	0	0
OTU0626	Eurotiomycetes genus Incertae sedis	0.000842566	0	jrk06859	Ascomycota	Leotiomycetes	Helotiales	Helotiales family incertae sedis	Polyphilus		unspecified_saprotroph	root_endophyte_dark_septate	hypervariable	root_endophyte_dark_septate	other_plant_pathogen	leaf/fruit/seed,soil,dung,animal_material		non-aquatic			filamentous_mycelium	none	none					#N/A	#N/A	#N/A	#N/A	#N/A	#N/A	#N/A	#N/A	#N/A	#N/A	#N/A	#N/A	#N/A	#N/A	#N/A	#N/A	#N/A	#N/A
OTU0627	Penicillium	0.000842566	0	jrk06917	Ascomycota	Leotiomycetes	Helotiales	Helotiales family incertae sedis	Potridiscus		litter_saprotroph	bryophilous				leaf/fruit/seed		non-aquatic			filamentous_mycelium	apothecium_(hymenium_on_surface)	smooth					0	unspecified_saprotroph	foliar_endophyte	toxin-producing,animal_parasite_some_species,mycoparasite_some_species	foliar_endophyte	0	soil	mold	partly_aquatic	opportunistic_human_parasite	0	filamentous_mycelium	0	0	0	0	0	0
OTU0628	Eurotiomycetes genus Incertae sedis	0.000842566	0	jrk07108	Ascomycota	Leotiomycetes	Helotiales	Helotiales family incertae sedis	Pseudolachnum		wood_saprotroph					wood		non-aquatic			filamentous_mycelium	apothecium_(hymenium_on_surface)	smooth					#N/A	#N/A	#N/A	#N/A	#N/A	#N/A	#N/A	#N/A	#N/A	#N/A	#N/A	#N/A	#N/A	#N/A	#N/A	#N/A	#N/A	#N/A
OTU0629	Sporidiobolaceae genus Incertae sedis	0.000842566	0	jrk07155	Ascomycota	Leotiomycetes	Helotiales	Helotiales family incertae sedis	Pseudopeltis		litter_saprotroph					leaf/fruit/seed		non-aquatic			filamentous_mycelium	apothecium_(hymenium_on_surface)	smooth					#N/A	#N/A	#N/A	#N/A	#N/A	#N/A	#N/A	#N/A	#N/A	#N/A	#N/A	#N/A	#N/A	#N/A	#N/A	#N/A	#N/A	#N/A
OTU0630	Eurotiomycetes genus Incertae sedis	0.000842566	0	jrk07207	Ascomycota	Leotiomycetes	Helotiales	Helotiales family incertae sedis	Pseudospiropes	synonym of Strossmayeria	litter_saprotroph					leaf/fruit/seed		non-aquatic			filamentous_mycelium							#N/A	#N/A	#N/A	#N/A	#N/A	#N/A	#N/A	#N/A	#N/A	#N/A	#N/A	#N/A	#N/A	#N/A	#N/A	#N/A	#N/A	#N/A
OTU0631	Chaetothyriales genus Incertae sedis	0.000842566	0	jrk07252	Ascomycota	Leotiomycetes	Helotiales	Helotiales family incertae sedis	Psilachnum		litter_saprotroph					leaf/fruit/seed		non-aquatic			filamentous_mycelium	apothecium_(hymenium_on_surface)	smooth					#N/A	#N/A	#N/A	#N/A	#N/A	#N/A	#N/A	#N/A	#N/A	#N/A	#N/A	#N/A	#N/A	#N/A	#N/A	#N/A	#N/A	#N/A
OTU0632	Eurotiomycetes genus Incertae sedis	0.000842566	0	jrk07260	Ascomycota	Leotiomycetes	Helotiales	Helotiales family incertae sedis	Psilophana		litter_saprotroph					leaf/fruit/seed		non-aquatic			filamentous_mycelium	apothecium_(hymenium_on_surface)	smooth					#N/A	#N/A	#N/A	#N/A	#N/A	#N/A	#N/A	#N/A	#N/A	#N/A	#N/A	#N/A	#N/A	#N/A	#N/A	#N/A	#N/A	#N/A
OTU0633	Eurotiomycetes genus Incertae sedis	0.000842566	0	jrk07280	Ascomycota	Leotiomycetes	Helotiales	Helotiales family incertae sedis	Pteromyces		litter_saprotroph					leaf/fruit/seed		non-aquatic			filamentous_mycelium	apothecium_(hymenium_on_surface)	smooth					#N/A	#N/A	#N/A	#N/A	#N/A	#N/A	#N/A	#N/A	#N/A	#N/A	#N/A	#N/A	#N/A	#N/A	#N/A	#N/A	#N/A	#N/A
OTU0634	Eurotiomycetes genus Incertae sedis	0.000842566	0	jrk07292	Ascomycota	Leotiomycetes	Helotiales	Helotiales family incertae sedis	Pubigera		litter_saprotroph					leaf/fruit/seed		non-aquatic		Pinaceae_needles	filamentous_mycelium	apothecium_(hymenium_on_surface)	smooth					#N/A	#N/A	#N/A	#N/A	#N/A	#N/A	#N/A	#N/A	#N/A	#N/A	#N/A	#N/A	#N/A	#N/A	#N/A	#N/A	#N/A	#N/A
OTU0635	Claussenomyces	0	0.00164818	jrk07415	Ascomycota	Leotiomycetes	Helotiales	Helotiales family incertae sedis	Radotinea		wood_saprotroph					wood		non-aquatic			filamentous_mycelium	apothecium_(hymenium_on_surface)	smooth					0	wood_saprotroph	0	0	0	0	wood	0	non-aquatic	0	0	filamentous_mycelium	apothecium_(hymenium_on_surface)	smooth	0	0	0	0
OTU0636	Constantinomyces	0.000842566	0	jrk07573	Ascomycota	Leotiomycetes	Helotiales	Helotiales family incertae sedis	Rhizothyrium		litter_saprotroph	plant_pathogen			leaf/fruit/seed_pathogen	leaf/fruit/seed		non-aquatic		Pinaceae_needles	filamentous_mycelium	apothecium_(hymenium_on_surface)	smooth					0	unspecified_saprotroph	rock-inhabiting	0	0	0	soil	0	non-aquatic	0	0	filamentous_mycelium	perithecium_(hymenium_hidden,_narrow_opening)	closed	0	0	0	0
OTU0637	Rhinocladiella	0.000842566	0	jrk07659	Ascomycota	Leotiomycetes	Helotiales	Helotiales family incertae sedis	Rodwayella		litter_saprotroph					leaf/fruit/seed		non-aquatic			filamentous_mycelium	apothecium_(hymenium_on_surface)	smooth					0	soil_saprotroph	animal_parasite	0	root_endophyte_dark_septate	root-associated	soil,animal_material	0	partly_freshwater_(partly_non-aquatic)	animal_parasite/opportunistic_human_parasite	0	dimorphic_yeast	0	0	0	0	0	0
OTU0638	Fusarium	0	0.00164818	jrk07673	Ascomycota	Leotiomycetes	Helotiales	Helotiales family incertae sedis	Rommelaarsia		litter_saprotroph					leaf/fruit/seed		non-aquatic			filamentous_mycelium	apothecium_(hymenium_on_surface)	smooth					0	plant_pathogen	litter_saprotroph	hypervariable,_saprotroph,_pathogen,damping-off_pathogen	foliar_endophyte	leaf/fruit/seed_pathogen	leaf/fruit/seed,roots,soil,animal_material	soft_rot	partly_aquatic	opportunistic_human_parasite	0	filamentous_mycelium	0	0	0	0	0	0
OTU0639	Pragmopora	0.000842566	0	jrk07687	Ascomycota	Leotiomycetes	Helotiales	Helotiales family incertae sedis	Roseodiscus		plant_pathogen	bryophilous			leaf/fruit/seed_pathogen	leaf/fruit/seed		non-aquatic		mosses	filamentous_mycelium	apothecium_(hymenium_on_surface)	smooth					0	wood_saprotroph	0	0	0	0	wood	0	non-aquatic	0	0	filamentous_mycelium	apothecium_(hymenium_on_surface)	smooth	0	0	0	0
OTU0640	Eurotiomycetes genus Incertae sedis	0.000842566	0	jrk07757	Ascomycota	Leotiomycetes	Helotiales	Helotiales family incertae sedis	Sageria		unspecified_saprotroph							non-aquatic			filamentous_mycelium							#N/A	#N/A	#N/A	#N/A	#N/A	#N/A	#N/A	#N/A	#N/A	#N/A	#N/A	#N/A	#N/A	#N/A	#N/A	#N/A	#N/A	#N/A
OTU0641	Chaenothecopsis	0.000842566	0	jrk07881	Ascomycota	Leotiomycetes	Helotiales	Helotiales family incertae sedis	Sclerocrana		litter_saprotroph	soil_saprotroph				leaf/fruit/seed,soil		non-aquatic			filamentous_mycelium	apothecium_(hymenium_on_surface)	smooth					0	unspecified_saprotroph	0	resin_saprotroph_some_species,lichen_parasite_some_species	0	0	0	0	non-aquatic	0	0	filamentous_mycelium	mazaedium_(pushpin-like)	other	0	0	0	0
OTU0642	Meristemomyces	0	0.00164818	jrk07944	Ascomycota	Leotiomycetes	Helotiales	Helotiales family incertae sedis	Scutulopsis		unspecified_symbiotroph	root-associated		root-associated	root-associated			non-aquatic		Pinaceae	filamentous_mycelium	apothecium_(hymenium_on_surface)	smooth					0	litter_saprotroph	rock-inhabiting	0	0	0	leaf/fruit/seed,soil	0	non-aquatic	0	0	filamentous_mycelium	perithecium_(hymenium_hidden,_narrow_opening)	closed	0	0	0	0
OTU0643	Cladosporium	0	0.00164818	jrk08150	Ascomycota	Leotiomycetes	Helotiales	Helotiales family incertae sedis	Soosiella		soil_saprotroph					soil		non-aquatic			filamentous_mycelium							0	litter_saprotroph	plant_pathogen	hypervariable	foliar_endophyte	leaf/fruit/seed_pathogen	wood,leaf/fruit/seed,soil,dung,animal_material	0	partly_aquatic	animal_parasite	0	filamentous_mycelium	perithecium_(hymenium_hidden,_narrow_opening)	closed	0	0	0	0
OTU0644	Eurotiomycetes genus Incertae sedis	0.000842566	0	jrk08155	Ascomycota	Leotiomycetes	Helotiales	Helotiales family incertae sedis	Sorokina		wood_saprotroph					wood		non-aquatic			filamentous_mycelium	apothecium_(hymenium_on_surface)	smooth					#N/A	#N/A	#N/A	#N/A	#N/A	#N/A	#N/A	#N/A	#N/A	#N/A	#N/A	#N/A	#N/A	#N/A	#N/A	#N/A	#N/A	#N/A
OTU0645		0.000842566	0	jrk08156	Ascomycota	Leotiomycetes	Helotiales	Helotiales family incertae sedis	Sorokinella		litter_saprotroph					leaf/fruit/seed		non-aquatic			filamentous_mycelium	apothecium_(hymenium_on_surface)	smooth					#N/A	#N/A	#N/A	#N/A	#N/A	#N/A	#N/A	#N/A	#N/A	#N/A	#N/A	#N/A	#N/A	#N/A	#N/A	#N/A	#N/A	#N/A
OTU0646	Scolecolachnum	0.000842566	0	jrk08250	Ascomycota	Leotiomycetes	Helotiales	Helotiales family incertae sedis	Spirosphaera		litter_saprotroph					leaf/fruit/seed		partly_freshwater_(partly_non-aquatic)			filamentous_mycelium							#N/A	#N/A	#N/A	#N/A	#N/A	#N/A	#N/A	#N/A	#N/A	#N/A	#N/A	#N/A	#N/A	#N/A	#N/A	#N/A	#N/A	#N/A
OTU0647	Neodevriesia	0.000842566	0	jrk08327	Ascomycota	Leotiomycetes	Helotiales	Helotiales family incertae sedis	Stamnaria		litter_saprotroph					leaf/fruit/seed		partly_freshwater_(partly_non-aquatic)			filamentous_mycelium	apothecium_(hymenium_on_surface)	smooth					0	plant_pathogen	litter_saprotroph	0	0	leaf/fruit/seed_pathogen	leaf/fruit/seed	0	partly_aquatic	0	0	filamentous_mycelium	perithecium_(hymenium_hidden,_narrow_opening)	closed	0	0	0	0
OTU0648	Eurotiomycetes genus Incertae sedis	0.000842566	0	jrk08424	Ascomycota	Leotiomycetes	Helotiales	Helotiales family incertae sedis	Stilbopeziza		wood_saprotroph					wood		non-aquatic			filamentous_mycelium	apothecium_(hymenium_on_surface)	smooth					#N/A	#N/A	#N/A	#N/A	#N/A	#N/A	#N/A	#N/A	#N/A	#N/A	#N/A	#N/A	#N/A	#N/A	#N/A	#N/A	#N/A	#N/A
OTU0649	Eurotiomycetes genus Incertae sedis	0.000842566	0	jrk08480	Ascomycota	Leotiomycetes	Helotiales	Helotiales family incertae sedis	Strossmayeria		wood_saprotroph					wood		non-aquatic			filamentous_mycelium	apothecium_(hymenium_on_surface)	smooth					#N/A	#N/A	#N/A	#N/A	#N/A	#N/A	#N/A	#N/A	#N/A	#N/A	#N/A	#N/A	#N/A	#N/A	#N/A	#N/A	#N/A	#N/A
OTU0650	Helotiales genus Incertae sedis	0	0.00164818	jrk08611	Ascomycota	Leotiomycetes	Helotiales	Helotiales family incertae sedis	Zugazaea		wood_saprotroph					wood		non-aquatic			filamentous_mycelium	apothecium_(hymenium_on_surface)	smooth					#N/A	#N/A	#N/A	#N/A	#N/A	#N/A	#N/A	#N/A	#N/A	#N/A	#N/A	#N/A	#N/A	#N/A	#N/A	#N/A	#N/A	#N/A
OTU0651	Pezizomycotina genus Incertae sedis	0.000842566	0	jrk08728	Ascomycota	Leotiomycetes	Helotiales	Helotiales family incertae sedis	Tetracladium		litter_saprotroph					leaf/fruit/seed		partly_freshwater_(partly_non-aquatic)			filamentous_mycelium							#N/A	#N/A	#N/A	#N/A	#N/A	#N/A	#N/A	#N/A	#N/A	#N/A	#N/A	#N/A	#N/A	#N/A	#N/A	#N/A	#N/A	#N/A
OTU0652	Pyrenochaetopsis	0	0.00164818	jrk08775	Ascomycota	Leotiomycetes	Helotiales	Helotiales family incertae sedis	Thedgonia		plant_pathogen				leaf/fruit/seed_pathogen			non-aquatic			filamentous_mycelium							0	foliar_endophyte	litter_saprotroph	0	foliar_endophyte	0	leaf/fruit/seed	0	non-aquatic	0	0	filamentous_mycelium	0	0	0	0	0	0
OTU0653	Alatospora	0	0.00164818	jrk08796	Ascomycota	Leotiomycetes	Helotiales	Helotiales family incertae sedis	Themisia		wood_saprotroph					wood		non-aquatic			filamentous_mycelium	apothecium_(hymenium_on_surface)	smooth					0	litter_saprotroph	0	0	0	0	leaf/fruit/seed	0	partly_freshwater_(partly_non-aquatic)	0	0	filamentous_mycelium	none	none	0	0	0	0
OTU0654	Pseudogymnoascus	0	0.00164818	jrk08900	Ascomycota	Leotiomycetes	Helotiales	Helotiales family incertae sedis	Tovariella		litter_saprotroph	plant_pathogen			leaf/fruit/seed_pathogen	leaf/fruit/seed		non-aquatic			filamentous_mycelium	apothecium_(hymenium_on_surface)	smooth					0	soil_saprotroph	0	0	0	0	soil	0	partly_aquatic	opportunistic_animal_parasite_G._destructans	0	filamentous_mycelium	cleistothecium_(closed,_spherical)	closed	0	0	0	0
OTU0655	Ascomycota genus Incertae sedis	0	0.00164818	jrk08984	Ascomycota	Leotiomycetes	Helotiales	Helotiales family incertae sedis	Trichohelotium		unspecified_saprotroph							non-aquatic			filamentous_mycelium							#N/A	#N/A	#N/A	#N/A	#N/A	#N/A	#N/A	#N/A	#N/A	#N/A	#N/A	#N/A	#N/A	#N/A	#N/A	#N/A	#N/A	#N/A
OTU0656	Chaenotheca	0.000842566	0	jrk09056	Ascomycota	Leotiomycetes	Helotiales	Helotiales family incertae sedis	Triposporium		foliar_endophyte	litter_saprotroph		foliar_endophyte		leaf/fruit/seed		non-aquatic			filamentous_mycelium							0	lichenized	0	0	0	0	0	0	non-aquatic	0	0	thallus_photosynthetic	mazaedium_(pushpin-like)	other	0	0	chlorococcoid	trentepohlioid
OTU0657	Constantinomyces	0.000842566	0	jrk09177	Ascomycota	Leotiomycetes	Helotiales	Helotiales family incertae sedis	Urceolella		litter_saprotroph					leaf/fruit/seed		non-aquatic			filamentous_mycelium	apothecium_(hymenium_on_surface)	smooth					0	unspecified_saprotroph	rock-inhabiting	0	0	0	soil	0	non-aquatic	0	0	filamentous_mycelium	perithecium_(hymenium_hidden,_narrow_opening)	closed	0	0	0	0
OTU0658	Constantinomyces	0.000842566	0	jrk09228	Ascomycota	Leotiomycetes	Helotiales	Helotiales family incertae sedis	Waltonia		wood_saprotroph					wood		non-aquatic			filamentous_mycelium	apothecium_(hymenium_on_surface)	smooth					0	unspecified_saprotroph	rock-inhabiting	0	0	0	soil	0	non-aquatic	0	0	filamentous_mycelium	perithecium_(hymenium_hidden,_narrow_opening)	closed	0	0	0	0
OTU0659	Neocatenulostroma	0.000842566	0	jrk09381	Ascomycota	Leotiomycetes	Helotiales	Helotiales family incertae sedis	Woodiella		litter_saprotroph					leaf/fruit/seed		non-aquatic			filamentous_mycelium	apothecium_(hymenium_on_surface)	smooth					0	plant_pathogen	litter_saprotroph	0	0	leaf/fruit/seed_pathogen	leaf/fruit/seed	0	non-aquatic	0	0	filamentous_mycelium	perithecium_(hymenium_hidden,_narrow_opening)	closed	0	0	0	0
OTU0660	Bloxamia	0	0.00164818	jrk09466	Ascomycota	Leotiomycetes	Helotiales	Helotiales family incertae sedis	Xeromedulla		litter_saprotroph	plant_pathogen			leaf/fruit/seed_pathogen	leaf/fruit/seed		non-aquatic			filamentous_mycelium	apothecium_(hymenium_on_surface)	smooth					#N/A	#N/A	#N/A	#N/A	#N/A	#N/A	#N/A	#N/A	#N/A	#N/A	#N/A	#N/A	#N/A	#N/A	#N/A	#N/A	#N/A	#N/A
OTU0661	Pseudeurotium	0	0.00164818	jrk00694	Ascomycota	Leotiomycetes	Helotiales	Hyaloscyphaceae	Asperopilum		litter_saprotroph					leaf/fruit/seed		non-aquatic			filamentous_mycelium	apothecium_(hymenium_on_surface)	smooth					0	dung_saprotroph	soil_saprotroph	0	0	0	soil,dung	0	partly_aquatic	0	0	filamentous_mycelium	cleistothecium_(closed,_spherical)	closed	0	0	0	0
OTU0662	Pezicula	0	0.00164818	jrk02166	Ascomycota	Leotiomycetes	Helotiales	Hyaloscyphaceae	Crucellisporiopsis		plant_pathogen				leaf/fruit/seed_pathogen			non-aquatic			filamentous_mycelium							#N/A	#N/A	#N/A	#N/A	#N/A	#N/A	#N/A	#N/A	#N/A	#N/A	#N/A	#N/A	#N/A	#N/A	#N/A	#N/A	#N/A	#N/A
OTU0663	Pseudoophiobolus	0.000842566	0	jrk03285	Ascomycota	Leotiomycetes	Helotiales	Hyaloscyphaceae	Fuscolachnum		litter_saprotroph					leaf/fruit/seed		non-aquatic			filamentous_mycelium	apothecium_(hymenium_on_surface)	smooth					0	litter_saprotroph	wood_saprotroph	0	no_endophytic_capacity	0	wood,leaf/fruit/seed	0	non-aquatic	0	0	filamentous_mycelium	perithecium_(hymenium_hidden,_narrow_opening)	closed	0	0	0	0
OTU0664	Xenopolyscytalum	0.000842566	0	jrk03955	Ascomycota	Leotiomycetes	Helotiales	Hyaloscyphaceae	Hyalopeziza		litter_saprotroph					leaf/fruit/seed		partly_freshwater_(partly_non-aquatic)			filamentous_mycelium	apothecium_(hymenium_on_surface)	smooth					#N/A	#N/A	#N/A	#N/A	#N/A	#N/A	#N/A	#N/A	#N/A	#N/A	#N/A	#N/A	#N/A	#N/A	#N/A	#N/A	#N/A	#N/A
OTU0665	Botryolepraria	0	0.00164818	jrk04031	Ascomycota	Leotiomycetes	Helotiales	Hyaloscyphaceae	Hyphodiscus		mycoparasite		wood_saprotroph_some_species			fungal_material		non-aquatic			filamentous_mycelium	apothecium_(hymenium_on_surface)	smooth					0	lichenized	0	0	0	0	0	0	non-aquatic	0	0	thallus_photosynthetic	0	0	0	0	chlorococcoid	0
OTU0666	Herpotrichiellaceae genus Incertae sedis	0	0.00164818	jrk09275	Ascomycota	Leotiomycetes	Helotiales	Hyaloscyphaceae	Venturiocistella		litter_saprotroph		wood_saprotroph_some_species			leaf/fruit/seed		non-aquatic			filamentous_mycelium	apothecium_(hymenium_on_surface)	smooth					#N/A	#N/A	#N/A	#N/A	#N/A	#N/A	#N/A	#N/A	#N/A	#N/A	#N/A	#N/A	#N/A	#N/A	#N/A	#N/A	#N/A	#N/A
OTU0667	Ciliolarina	0.000842566	0	jrk09872	Ascomycota	Leotiomycetes	Helotiales	Lachnaceae	Dasyscyphus	synonym of Lachnum	litter_saprotroph		toxin-producing			leaf/fruit/seed		partly_freshwater_(partly_non-aquatic)			filamentous_mycelium							#N/A	#N/A	#N/A	#N/A	#N/A	#N/A	#N/A	#N/A	#N/A	#N/A	#N/A	#N/A	#N/A	#N/A	#N/A	#N/A	#N/A	#N/A
OTU0668	Infundichalara	0.000842566	0	jrk04423	Ascomycota	Leotiomycetes	Helotiales	Lachnaceae	Lachnellula		wood_saprotroph					wood		non-aquatic			filamentous_mycelium	apothecium_(hymenium_on_surface)	smooth					#N/A	#N/A	#N/A	#N/A	#N/A	#N/A	#N/A	#N/A	#N/A	#N/A	#N/A	#N/A	#N/A	#N/A	#N/A	#N/A	#N/A	#N/A
OTU0669	Helotiales genus Incertae sedis	0	0.00164818	jrk04605	Ascomycota	Leotiomycetes	Helotiales	Leptodontidiaceae	Leptodontidium		litter_saprotroph	ericoid_mycorrhizal		root_endophyte_dark_septate		leaf/fruit/seed		partly_aquatic			filamentous_mycelium	None	none					#N/A	#N/A	#N/A	#N/A	#N/A	#N/A	#N/A	#N/A	#N/A	#N/A	#N/A	#N/A	#N/A	#N/A	#N/A	#N/A	#N/A	#N/A
OTU0670	Beskidomyces	0.000842566	0	jrk00923	Ascomycota	Leotiomycetes	Helotiales	Mollisiaceae	Barrenia		root_endophyte	soil_saprotroph		root_endophyte		soil		non-aquatic			filamentous_mycelium							#N/A	#N/A	#N/A	#N/A	#N/A	#N/A	#N/A	#N/A	#N/A	#N/A	#N/A	#N/A	#N/A	#N/A	#N/A	#N/A	#N/A	#N/A
OTU0671	Infundichalara	0.000842566	0	jrk01683	Ascomycota	Leotiomycetes	Helotiales	Mollisiaceae	Cheirospora		wood_saprotroph					wood		non-aquatic			filamentous_mycelium	none	none					#N/A	#N/A	#N/A	#N/A	#N/A	#N/A	#N/A	#N/A	#N/A	#N/A	#N/A	#N/A	#N/A	#N/A	#N/A	#N/A	#N/A	#N/A
OTU0672	Geomyces	0	0.00164818	jrk02114	Ascomycota	Leotiomycetes	Helotiales	Mollisiaceae	Corynesporopsis		unspecified_saprotroph							non-aquatic			filamentous_mycelium	perithecium_(hymenium_hidden,_narrow_opening)	closed					0	soil_saprotroph	0	0	0	0	soil	0	partly_aquatic	0	0	filamentous_mycelium	cleistothecium_(closed,_spherical)	closed	0	0	0	0
OTU0673	Exophiala	0	0.00164818	jrk03289	Ascomycota	Leotiomycetes	Helotiales	Mollisiaceae	Fuscosclera		wood_saprotroph					wood		non-aquatic			filamentous_mycelium	none	none					0	animal_parasite	litter_saprotroph	0	root_endophyte_dark_septate	root-associated	leaf/fruit/seed,animal_material	0	partly_aquatic	animal_parasite/opportunistic_human_parasite	0	dimorphic_yeast	0	0	0	0	0	0
OTU0674	Xylodon	0.000842566	0	jrk09889	Ascomycota	Leotiomycetes	Helotiales	Mollisiaceae	Phaeomollisia		foliar_endophyte	wood_saprotroph		foliar_endophyte		wood,leaf/fruit/seed		non-aquatic			filamentous_mycelium	apothecium_(hymenium_on_surface)	smooth					0	wood_saprotroph	0	0	0	0	wood	white_rot	partly_aquatic	0	0	filamentous_mycelium	corticioid	hydnoid	0	0	0	0
OTU0675	Infundichalara	0.000842566	0	jrk03102	Ascomycota	Leotiomycetes	Helotiales	Neolauriomycetaceae	Exochalara		litter_saprotroph	wood_saprotroph				wood,leaf/fruit/seed		non-aquatic			filamentous_mycelium	none	none					#N/A	#N/A	#N/A	#N/A	#N/A	#N/A	#N/A	#N/A	#N/A	#N/A	#N/A	#N/A	#N/A	#N/A	#N/A	#N/A	#N/A	#N/A
OTU0676	Neodevriesia	0.000842566	0	jrk04468	Ascomycota	Leotiomycetes	Helotiales	Neolauriomycetaceae	Lareunionomyces		litter_saprotroph					leaf/fruit/seed		non-aquatic			filamentous_mycelium	none	none					0	plant_pathogen	litter_saprotroph	0	0	leaf/fruit/seed_pathogen	leaf/fruit/seed	0	partly_aquatic	0	0	filamentous_mycelium	perithecium_(hymenium_hidden,_narrow_opening)	closed	0	0	0	0
OTU0677	Lophium	0.000842566	0	jrk05643	Ascomycota	Leotiomycetes	Helotiales	Neolauriomycetaceae	Neolauriomyces		litter_saprotroph					leaf/fruit/seed		non-aquatic			filamentous_mycelium	none	none					0	litter_saprotroph	0	0	0	0	leaf/fruit/seed	0	non-aquatic	0	0	filamentous_mycelium	0	0	0	0	0	0
OTU0678	Infundichalara	0.000842566	0	jrk00236	Ascomycota	Leotiomycetes	Helotiales	Pezizellaceae	Allophylaria		litter_saprotroph					leaf/fruit/seed		non-aquatic			filamentous_mycelium	apothecium_(hymenium_on_surface)	smooth					#N/A	#N/A	#N/A	#N/A	#N/A	#N/A	#N/A	#N/A	#N/A	#N/A	#N/A	#N/A	#N/A	#N/A	#N/A	#N/A	#N/A	#N/A
OTU0679	Devriesia	0.000842566	0	jrk00453	Ascomycota	Leotiomycetes	Helotiales	Pezizellaceae	Antinoa		litter_saprotroph					leaf/fruit/seed		non-aquatic			filamentous_mycelium	apothecium_(hymenium_on_surface)	smooth					0	plant_pathogen	litter_saprotroph	0	0	leaf/fruit/seed_pathogen	leaf/fruit/seed	0	non-aquatic	0	0	filamentous_mycelium	perithecium_(hymenium_hidden,_narrow_opening)	closed	0	0	0	0
OTU0680	Capnodiales genus Incertae sedis	0.000842566	0	jrk00835	Ascomycota	Leotiomycetes	Helotiales	Pezizellaceae	Austropezia		litter_saprotroph					leaf/fruit/seed		non-aquatic			filamentous_mycelium	apothecium_(hymenium_on_surface)	smooth					#N/A	#N/A	#N/A	#N/A	#N/A	#N/A	#N/A	#N/A	#N/A	#N/A	#N/A	#N/A	#N/A	#N/A	#N/A	#N/A	#N/A	#N/A
OTU0681	Agaricostilbales genus Incertae sedis	0.000842566	0	jrk01350	Ascomycota	Leotiomycetes	Helotiales	Pezizellaceae	Calycellina		litter_saprotroph					leaf/fruit/seed		non-aquatic			filamentous_mycelium	apothecium_(hymenium_on_surface)	smooth					#N/A	#N/A	#N/A	#N/A	#N/A	#N/A	#N/A	#N/A	#N/A	#N/A	#N/A	#N/A	#N/A	#N/A	#N/A	#N/A	#N/A	#N/A
OTU0682	Devriesia	0.000842566	0	jrk01353	Ascomycota	Leotiomycetes	Helotiales	Pezizellaceae	Calycina		wood_saprotroph	foliar_endophyte		foliar_endophyte		wood,leaf/fruit/seed		non-aquatic			filamentous_mycelium	apothecium_(hymenium_on_surface)	smooth					0	plant_pathogen	litter_saprotroph	0	0	leaf/fruit/seed_pathogen	leaf/fruit/seed	0	non-aquatic	0	0	filamentous_mycelium	perithecium_(hymenium_hidden,_narrow_opening)	closed	0	0	0	0
OTU0683	Devriesia	0	0.00164818	jrk01652	Ascomycota	Leotiomycetes	Helotiales	Pezizellaceae	Chalara		litter_saprotroph	plant_pathogen	hypervariable	foliar_endophyte	wood_pathogen,leaf/fruit/seed_pathogen	wood,leaf/fruit/seed	soft_rot	non-aquatic			filamentous_mycelium	None	none					0	plant_pathogen	litter_saprotroph	0	0	leaf/fruit/seed_pathogen	leaf/fruit/seed	0	non-aquatic	0	0	filamentous_mycelium	perithecium_(hymenium_hidden,_narrow_opening)	closed	0	0	0	0
OTU0684	Infundichalara	0.000842566	0	jrk03950	Ascomycota	Leotiomycetes	Helotiales	Pezizellaceae	Hyalodendriella		wood_saprotroph					wood		non-aquatic			filamentous_mycelium	none	none					#N/A	#N/A	#N/A	#N/A	#N/A	#N/A	#N/A	#N/A	#N/A	#N/A	#N/A	#N/A	#N/A	#N/A	#N/A	#N/A	#N/A	#N/A
OTU0685	Talaromyces	0.000842566	0	jrk05164	Ascomycota	Leotiomycetes	Helotiales	Pezizellaceae	Micropeziza		litter_saprotroph					leaf/fruit/seed		non-aquatic			filamentous_mycelium	apothecium_(hymenium_on_surface)	smooth					0	unspecified_saprotroph	0	hyperviariable,_thermophile,_some_species_animal_parasite_some_species_various_saprotrophs	0	0	leaf/fruit/seed,soil,animal_material	mold	partly_aquatic	opportunistic_human_parasite	0	filamentous_mycelium	0	0	0	0	0	0
OTU0686	Subulicystidium	0	0.00164818	jrk05248	Ascomycota	Leotiomycetes	Helotiales	Pezizellaceae	Mollisina		litter_saprotroph					leaf/fruit/seed		non-aquatic			filamentous_mycelium	apothecium_(hymenium_on_surface)	smooth					0	wood_saprotroph	0	0	0	0	wood	white_rot	non-aquatic	0	0	filamentous_mycelium	corticioid	smooth	0	0	0	0
OTU0687	Ciliolarina	0.000842566	0	jrk05249	Ascomycota	Leotiomycetes	Helotiales	Pezizellaceae	Mollisinopsis		litter_saprotroph					leaf/fruit/seed		non-aquatic			filamentous_mycelium	apothecium_(hymenium_on_surface)	smooth					#N/A	#N/A	#N/A	#N/A	#N/A	#N/A	#N/A	#N/A	#N/A	#N/A	#N/A	#N/A	#N/A	#N/A	#N/A	#N/A	#N/A	#N/A
OTU0688	Ciliolarina	0.000842566	0	jrk05303	Ascomycota	Leotiomycetes	Helotiales	Pezizellaceae	Moserella		unspecified_symbiotroph	root-associated		root-associated	root-associated			non-aquatic			filamentous_mycelium	apothecium_(hymenium_on_surface)	smooth					#N/A	#N/A	#N/A	#N/A	#N/A	#N/A	#N/A	#N/A	#N/A	#N/A	#N/A	#N/A	#N/A	#N/A	#N/A	#N/A	#N/A	#N/A
OTU0689	Myriangiales genus Incertae sedis	0.000842566	0	jrk06426	Ascomycota	Leotiomycetes	Helotiales	Pezizellaceae	Phaeoscypha		litter_saprotroph					leaf/fruit/seed		non-aquatic			filamentous_mycelium	apothecium_(hymenium_on_surface)	smooth					#N/A	#N/A	#N/A	#N/A	#N/A	#N/A	#N/A	#N/A	#N/A	#N/A	#N/A	#N/A	#N/A	#N/A	#N/A	#N/A	#N/A	#N/A
OTU0690	Infundichalara	0.000842566	0	jrk06799	Ascomycota	Leotiomycetes	Helotiales	Pezizellaceae	Poculinia		litter_saprotroph					leaf/fruit/seed		non-aquatic			filamentous_mycelium	apothecium_(hymenium_on_surface)	smooth					#N/A	#N/A	#N/A	#N/A	#N/A	#N/A	#N/A	#N/A	#N/A	#N/A	#N/A	#N/A	#N/A	#N/A	#N/A	#N/A	#N/A	#N/A
OTU0691	Ciliolarina	0.000842566	0	jrk07890	Ascomycota	Leotiomycetes	Helotiales	Pezizellaceae	Scleropezicula		wood_saprotroph					wood		non-aquatic			filamentous_mycelium	apothecium_(hymenium_on_surface)	smooth					#N/A	#N/A	#N/A	#N/A	#N/A	#N/A	#N/A	#N/A	#N/A	#N/A	#N/A	#N/A	#N/A	#N/A	#N/A	#N/A	#N/A	#N/A
OTU0692	Infundichalara	0.000842566	0	jrk09868	Ascomycota	Leotiomycetes	Helotiales	Pezizellaceae	Zymochalara		litter_saprotroph					leaf/fruit/seed		non-aquatic		ferns	filamentous_mycelium							#N/A	#N/A	#N/A	#N/A	#N/A	#N/A	#N/A	#N/A	#N/A	#N/A	#N/A	#N/A	#N/A	#N/A	#N/A	#N/A	#N/A	#N/A
OTU0693	Ciliolarina	0.000842566	0	jrk09268	Ascomycota	Leotiomycetes	Helotiales	Pezizellaceae	Velutaria		wood_saprotroph					wood		non-aquatic			filamentous_mycelium	apothecium_(hymenium_on_surface)	smooth					#N/A	#N/A	#N/A	#N/A	#N/A	#N/A	#N/A	#N/A	#N/A	#N/A	#N/A	#N/A	#N/A	#N/A	#N/A	#N/A	#N/A	#N/A
OTU0694	Hyaloscypha	0	0.00164818	jrk09473	Ascomycota	Leotiomycetes	Helotiales	Pezizellaceae	Xiambola		litter_saprotroph					leaf/fruit/seed		non-aquatic			filamentous_mycelium							0	litter_saprotroph	wood_saprotroph	ectomycorrhizal_H._Bicolor,_H._Finlandica,_ericoid_mycorrhizal_H._Variabilis,_plant_pathogen_some_species	0	leaf/fruit/seed_pathogen	wood,leaf/fruit/seed	0	partly_freshwater_(partly_non-aquatic)	0	mosses	filamentous_mycelium	apothecium_(hymenium_on_surface)	smooth	0	0	0	0
OTU0695	Apiotrichum	0	0.00164818	jrk06749	Ascomycota	Leotiomycetes	Helotiales	Pleuroascaceae	Pleuroascus		dung_saprotroph					dung		non-aquatic			filamentous_mycelium	cleistothecium_(closed,_spherical)	closed					0	soil_saprotroph	0	0	0	0	soil	0	partly_aquatic	0	0	yeast	none	none	0	0	0	0
OTU0696	Pragmopora	0.000842566	0	jrk10115	Ascomycota	Leotiomycetes	Helotiales	Ploettnerulaceae	Volucrispora		litter_saprotroph					leaf/fruit/seed		partly_freshwater_(partly_non-aquatic)			filamentous_mycelium							0	wood_saprotroph	0	0	0	0	wood	0	non-aquatic	0	0	filamentous_mycelium	apothecium_(hymenium_on_surface)	smooth	0	0	0	0
OTU0697	Infundichalara	0.000842566	0	jrk06892	Ascomycota	Leotiomycetes	Helotiales	Porodiplodiaceae	Porodiplodia		litter_saprotroph					leaf/fruit/seed		non-aquatic			filamentous_mycelium	None	none					#N/A	#N/A	#N/A	#N/A	#N/A	#N/A	#N/A	#N/A	#N/A	#N/A	#N/A	#N/A	#N/A	#N/A	#N/A	#N/A	#N/A	#N/A
OTU0698	Phialocephala	0.000842566	0	jrk01021	Ascomycota	Leotiomycetes	Helotiales	Rutstroemiaceae	Bicornispora		litter_saprotroph					leaf/fruit/seed		non-aquatic			filamentous_mycelium	cleistothecium_(closed,_spherical)	closed					0	soil_saprotroph	root_endophyte	0	root_endophyte_dark_septate	root-associated	roots,soil	0	non-aquatic	0	0	filamentous_mycelium	apothecium_(hymenium_on_surface)	smooth	0	0	0	0
OTU0699	Ciliolarina	0.000842566	0	jrk02444	Ascomycota	Leotiomycetes	Helotiales	Rutstroemiaceae	Dencoeliopsis		unspecified_saprotroph	fungal_decomposer	litter_saprotroph_one_species			fungal_material		non-aquatic			filamentous_mycelium	apothecium_(hymenium_on_surface)	smooth					#N/A	#N/A	#N/A	#N/A	#N/A	#N/A	#N/A	#N/A	#N/A	#N/A	#N/A	#N/A	#N/A	#N/A	#N/A	#N/A	#N/A	#N/A
OTU0700	Nemania	0	0.00164818	jrk04446	Ascomycota	Leotiomycetes	Helotiales	Rutstroemiaceae	Lambertella		litter_saprotroph		plant_pathogen_weak_some_species			leaf/fruit/seed		partly_freshwater_(partly_non-aquatic)			filamentous_mycelium	apothecium_(hymenium_on_surface)	smooth					0	wood_saprotroph	0	0	0	0	wood	0	non-aquatic	0	0	filamentous_mycelium	perithecium_(hymenium_hidden,_narrow_opening)	closed	0	0	0	0
OTU0701	Petrophila	0.000842566	0	jrk04463	Ascomycota	Leotiomycetes	Helotiales	Rutstroemiaceae	Lanzia		litter_saprotroph					leaf/fruit/seed		non-aquatic			filamentous_mycelium	apothecium_(hymenium_on_surface)	smooth					0	unspecified_saprotroph	rock-inhabiting	0	0	0	soil	0	non-aquatic	0	0	filamentous_mycelium	perithecium_(hymenium_hidden,_narrow_opening)	closed	0	0	0	0
OTU0702	Claussenomyces	0.000842566	0	jrk05240	Ascomycota	Leotiomycetes	Helotiales	Rutstroemiaceae	Moellerodiscus		litter_saprotroph					leaf/fruit/seed		non-aquatic			filamentous_mycelium	apothecium_(hymenium_on_surface)	smooth					0	wood_saprotroph	0	0	0	0	wood	0	non-aquatic	0	0	filamentous_mycelium	apothecium_(hymenium_on_surface)	smooth	0	0	0	0
OTU0703	Infundichalara	0.000842566	0	jrk05658	Ascomycota	Leotiomycetes	Helotiales	Rutstroemiaceae	Neometulocladosporiella		plant_pathogen				other_plant_pathogen			non-aquatic			filamentous_mycelium	none	none					#N/A	#N/A	#N/A	#N/A	#N/A	#N/A	#N/A	#N/A	#N/A	#N/A	#N/A	#N/A	#N/A	#N/A	#N/A	#N/A	#N/A	#N/A
OTU0704	Capronia	0.000842566	0	jrk06607	Ascomycota	Leotiomycetes	Helotiales	Rutstroemiaceae	Piceomphale		litter_saprotroph					leaf/fruit/seed		non-aquatic			filamentous_mycelium	apothecium_(hymenium_on_surface)	smooth					0	soil_saprotroph	root_endophyte_dark_septate	mycoparasite_some_species,animal_pathogen_some_species	root_endophyte_dark_septate	0	soil	0	partly_aquatic	animal_parasite/opportunistic_human_parasite	0	dimorphic_yeast	0	0	0	0	0	0
OTU0705	Devriesia	0.000842566	0	jrk09878	Ascomycota	Leotiomycetes	Helotiales	Rutstroemiaceae	Poculum	synonym of Rutstroemia	litter_saprotroph					leaf/fruit/seed		non-aquatic			filamentous_mycelium	apothecium_(hymenium_on_surface)	smooth					0	plant_pathogen	litter_saprotroph	0	0	leaf/fruit/seed_pathogen	leaf/fruit/seed	0	non-aquatic	0	0	filamentous_mycelium	perithecium_(hymenium_hidden,_narrow_opening)	closed	0	0	0	0
OTU0706	Fungi genus Incertae sedis	0.000842566	0	jrk07729	Ascomycota	Leotiomycetes	Helotiales	Rutstroemiaceae	Rutstroemia		litter_saprotroph					leaf/fruit/seed		non-aquatic			filamentous_mycelium	apothecium_(hymenium_on_surface)	smooth					#N/A	#N/A	#N/A	#N/A	#N/A	#N/A	#N/A	#N/A	#N/A	#N/A	#N/A	#N/A	#N/A	#N/A	#N/A	#N/A	#N/A	#N/A
OTU0707	Debaryomyces	0.000842566	0	jrk00293	Ascomycota	Leotiomycetes	Helotiales	Sclerotiniaceae	Amerosporium		plant_pathogen				leaf/fruit/seed_pathogen			non-aquatic			filamentous_mycelium	none	none					0	nectar/tap_saprotroph	0	0	0	0	sugar-rich_substrates	0	partly_aquatic	arthropod-associated	0	yeast	none	none	0	0	0	0
OTU0708	Lecanoromycetes genus Incertae sedis	0.000842566	0	jrk00326	Ascomycota	Leotiomycetes	Helotiales	Sclerotiniaceae	Amphobotrys		plant_pathogen				leaf/fruit/seed_pathogen			non-aquatic			filamentous_mycelium							#N/A	#N/A	#N/A	#N/A	#N/A	#N/A	#N/A	#N/A	#N/A	#N/A	#N/A	#N/A	#N/A	#N/A	#N/A	#N/A	#N/A	#N/A
OTU0709	Saxophila	0.000842566	0	jrk00910	Ascomycota	Leotiomycetes	Helotiales	Sclerotiniaceae	Banksiamyces		litter_saprotroph					leaf/fruit/seed		non-aquatic		Banksia_cones	filamentous_mycelium	apothecium_(hymenium_on_surface)	smooth					0	unspecified_saprotroph	rock-inhabiting	0	0	0	soil	0	non-aquatic	0	0	filamentous_mycelium	perithecium_(hymenium_hidden,_narrow_opening)	closed	0	0	0	0
OTU0710	Chaetosphaeria	0	0.00164818	jrk01136	Ascomycota	Leotiomycetes	Helotiales	Sclerotiniaceae	Botrytis		plant_pathogen	litter_saprotroph			leaf/fruit/seed_pathogen	leaf/fruit/seed		partly_aquatic			filamentous_mycelium	none	none					0	litter_saprotroph	wood_saprotroph	0	foliar_endophyte	0	wood,leaf/fruit/seed	0	partly_freshwater_(partly_non-aquatic)	0	0	filamentous_mycelium	perithecium_(hymenium_hidden,_narrow_opening)	closed	0	0	0	0
OTU0711	Oidiodendron	0	0.00164818	jrk01756	Ascomycota	Leotiomycetes	Helotiales	Sclerotiniaceae	Ciboria		plant_pathogen	litter_saprotroph	litter_saprotroph_many_species		leaf/fruit/seed_pathogen	leaf/fruit/seed		non-aquatic			filamentous_mycelium	apothecium_(hymenium_on_surface)	smooth					#N/A	#N/A	#N/A	#N/A	#N/A	#N/A	#N/A	#N/A	#N/A	#N/A	#N/A	#N/A	#N/A	#N/A	#N/A	#N/A	#N/A	#N/A
OTU0712	Chaetothyriales genus Incertae sedis	0	0.00164818	jrk01757	Ascomycota	Leotiomycetes	Helotiales	Sclerotiniaceae	Ciborinia		plant_pathogen				leaf/fruit/seed_pathogen			non-aquatic			filamentous_mycelium	apothecium_(hymenium_on_surface)	smooth					#N/A	#N/A	#N/A	#N/A	#N/A	#N/A	#N/A	#N/A	#N/A	#N/A	#N/A	#N/A	#N/A	#N/A	#N/A	#N/A	#N/A	#N/A
OTU0713	Saxophila	0.000842566	0	jrk09880	Ascomycota	Leotiomycetes	Helotiales	Sclerotiniaceae	Ciboriopsis		litter_saprotroph					leaf/fruit/seed		non-aquatic			filamentous_mycelium	apothecium_(hymenium_on_surface)	smooth					0	unspecified_saprotroph	rock-inhabiting	0	0	0	soil	0	non-aquatic	0	0	filamentous_mycelium	perithecium_(hymenium_hidden,_narrow_opening)	closed	0	0	0	0
OTU0714	Penicillium	0	0.00164818	jrk01814	Ascomycota	Leotiomycetes	Helotiales	Sclerotiniaceae	Clarireedia		plant_pathogen				leaf/fruit/seed_pathogen			non-aquatic			filamentous_mycelium	apothecium_(hymenium_on_surface)	smooth					0	unspecified_saprotroph	foliar_endophyte	toxin-producing,animal_parasite_some_species,mycoparasite_some_species	foliar_endophyte	0	soil	mold	partly_aquatic	opportunistic_human_parasite	0	filamentous_mycelium	0	0	0	0	0	0
OTU0715	Sorocybe	0.000842566	0	jrk02048	Ascomycota	Leotiomycetes	Helotiales	Sclerotiniaceae	Coprotinia		dung_saprotroph					dung		non-aquatic			filamentous_mycelium	apothecium_(hymenium_on_surface)	smooth					0	unspecified_saprotroph	resin_saprotroph	0	0	0	resins	0	non-aquatic	0	0	dimorphic_yeast	0	0	0	0	0	0
OTU0716	Amorphotheca	0.000842566	0	jrk02063	Ascomycota	Leotiomycetes	Helotiales	Sclerotiniaceae	Coremiella		litter_saprotroph					leaf/fruit/seed		non-aquatic			filamentous_mycelium							#N/A	#N/A	#N/A	#N/A	#N/A	#N/A	#N/A	#N/A	#N/A	#N/A	#N/A	#N/A	#N/A	#N/A	#N/A	#N/A	#N/A	#N/A
OTU0717	Oidiodendron	0.000842566	0	jrk02157	Ascomycota	Leotiomycetes	Helotiales	Sclerotiniaceae	Cristulariella		plant_pathogen				leaf/fruit/seed_pathogen			non-aquatic			filamentous_mycelium	none	none					#N/A	#N/A	#N/A	#N/A	#N/A	#N/A	#N/A	#N/A	#N/A	#N/A	#N/A	#N/A	#N/A	#N/A	#N/A	#N/A	#N/A	#N/A
OTU0718	Sorocybe	0.000842566	0	jrk02240	Ascomycota	Leotiomycetes	Helotiales	Sclerotiniaceae	Cudoniopsis		plant_pathogen				leaf/fruit/seed_pathogen			non-aquatic			filamentous_mycelium	apothecium_(hymenium_on_surface)	smooth					0	unspecified_saprotroph	resin_saprotroph	0	0	0	resins	0	non-aquatic	0	0	dimorphic_yeast	0	0	0	0	0	0
OTU0719	Lecanoromycetes genus Incertae sedis	0.000842566	0	jrk02789	Ascomycota	Leotiomycetes	Helotiales	Sclerotiniaceae	Dumontinia		plant_pathogen	unsepcified_saprotroph			root_pathogen	roots		non-aquatic			filamentous_mycelium	apothecium_(hymenium_on_surface)	smooth					#N/A	#N/A	#N/A	#N/A	#N/A	#N/A	#N/A	#N/A	#N/A	#N/A	#N/A	#N/A	#N/A	#N/A	#N/A	#N/A	#N/A	#N/A
OTU0720	Debaryomyces	0.000842566	0	jrk02866	Ascomycota	Leotiomycetes	Helotiales	Sclerotiniaceae	Elliottinia		plant_pathogen				leaf/fruit/seed_pathogen			non-aquatic			filamentous_mycelium	apothecium_(hymenium_on_surface)	smooth					0	nectar/tap_saprotroph	0	0	0	0	sugar-rich_substrates	0	partly_aquatic	arthropod-associated	0	yeast	none	none	0	0	0	0
OTU0721	Oidiodendron	0.000842566	0	jrk03567	Ascomycota	Leotiomycetes	Helotiales	Sclerotiniaceae	Grovesinia		plant_pathogen				leaf/fruit/seed_pathogen			non-aquatic			filamentous_mycelium	apothecium_(hymenium_on_surface)	smooth					#N/A	#N/A	#N/A	#N/A	#N/A	#N/A	#N/A	#N/A	#N/A	#N/A	#N/A	#N/A	#N/A	#N/A	#N/A	#N/A	#N/A	#N/A
OTU0722		0.000842566	0	jrk03699	Ascomycota	Leotiomycetes	Helotiales	Sclerotiniaceae	Haradamyces		plant_pathogen				leaf/fruit/seed_pathogen			non-aquatic			filamentous_mycelium	None	none					#N/A	#N/A	#N/A	#N/A	#N/A	#N/A	#N/A	#N/A	#N/A	#N/A	#N/A	#N/A	#N/A	#N/A	#N/A	#N/A	#N/A	#N/A
OTU0723	Sorocybe	0.000842566	0	jrk09881	Ascomycota	Leotiomycetes	Helotiales	Sclerotiniaceae	Hinomyces	synonym of Grovesinia	plant_pathogen				leaf/fruit/seed_pathogen			non-aquatic			filamentous_mycelium	apothecium_(hymenium_on_surface)	smooth					0	unspecified_saprotroph	resin_saprotroph	0	0	0	resins	0	non-aquatic	0	0	dimorphic_yeast	0	0	0	0	0	0
OTU0724		0.000842566	0	jrk04352	Ascomycota	Leotiomycetes	Helotiales	Sclerotiniaceae	Kohninia		litter_saprotroph					leaf/fruit/seed		non-aquatic			filamentous_mycelium	apothecium_(hymenium_on_surface)	smooth					#N/A	#N/A	#N/A	#N/A	#N/A	#N/A	#N/A	#N/A	#N/A	#N/A	#N/A	#N/A	#N/A	#N/A	#N/A	#N/A	#N/A	#N/A
OTU0725	Apiotrichum	0.000842566	0	jrk04942	Ascomycota	Leotiomycetes	Helotiales	Sclerotiniaceae	Martininia		litter_saprotroph					leaf/fruit/seed		non-aquatic			filamentous_mycelium	apothecium_(hymenium_on_surface)	smooth					0	soil_saprotroph	0	0	0	0	soil	0	partly_aquatic	0	0	yeast	none	none	0	0	0	0
OTU0726	Onygenales genus Incertae sedis	0	0.00164818	jrk09882	Ascomycota	Leotiomycetes	Helotiales	Sclerotiniaceae	Monilia		plant_pathogen				leaf/fruit/seed_pathogen			non-aquatic			filamentous_mycelium	apothecium_(hymenium_on_surface)	smooth					#N/A	#N/A	#N/A	#N/A	#N/A	#N/A	#N/A	#N/A	#N/A	#N/A	#N/A	#N/A	#N/A	#N/A	#N/A	#N/A	#N/A	#N/A
OTU0727	Ascomycota genus Incertae sedis	0.000842566	0	jrk05256	Ascomycota	Leotiomycetes	Helotiales	Sclerotiniaceae	Monilinia		plant_pathogen	litter_saprotroph			leaf/fruit/seed_pathogen	leaf/fruit/seed		non-aquatic			filamentous_mycelium	apothecium_(hymenium_on_surface)	smooth					#N/A	#N/A	#N/A	#N/A	#N/A	#N/A	#N/A	#N/A	#N/A	#N/A	#N/A	#N/A	#N/A	#N/A	#N/A	#N/A	#N/A	#N/A
OTU0728	Ascomycota genus Incertae sedis	0	0.00164818	jrk05450	Ascomycota	Leotiomycetes	Helotiales	Sclerotiniaceae	Myrioconium		plant_pathogen				leaf/fruit/seed_pathogen			non-aquatic			filamentous_mycelium							#N/A	#N/A	#N/A	#N/A	#N/A	#N/A	#N/A	#N/A	#N/A	#N/A	#N/A	#N/A	#N/A	#N/A	#N/A	#N/A	#N/A	#N/A
OTU0729	Ascomycota genus Incertae sedis	0.000842566	0	jrk05457	Ascomycota	Leotiomycetes	Helotiales	Sclerotiniaceae	Myriosclerotinia		plant_pathogen				leaf/fruit/seed_pathogen			non-aquatic			filamentous_mycelium	apothecium_(hymenium_on_surface)	smooth					#N/A	#N/A	#N/A	#N/A	#N/A	#N/A	#N/A	#N/A	#N/A	#N/A	#N/A	#N/A	#N/A	#N/A	#N/A	#N/A	#N/A	#N/A
OTU0730	Penicillium	0.000842566	0	jrk05995	Ascomycota	Leotiomycetes	Helotiales	Sclerotiniaceae	Ovulinia		plant_pathogen				leaf/fruit/seed_pathogen			non-aquatic			filamentous_mycelium	apothecium_(hymenium_on_surface)	smooth					0	unspecified_saprotroph	foliar_endophyte	toxin-producing,animal_parasite_some_species,mycoparasite_some_species	foliar_endophyte	0	soil	mold	partly_aquatic	opportunistic_human_parasite	0	filamentous_mycelium	0	0	0	0	0	0
OTU0731	Ascomycota genus Incertae sedis	0.000842566	0	jrk06425	Ascomycota	Leotiomycetes	Helotiales	Sclerotiniaceae	Phaeosclerotinia		plant_pathogen				leaf/fruit/seed_pathogen			non-aquatic			filamentous_mycelium	apothecium_(hymenium_on_surface)	smooth					#N/A	#N/A	#N/A	#N/A	#N/A	#N/A	#N/A	#N/A	#N/A	#N/A	#N/A	#N/A	#N/A	#N/A	#N/A	#N/A	#N/A	#N/A
OTU0732	Ascomycota genus Incertae sedis	0.000842566	0	jrk07042	Ascomycota	Leotiomycetes	Helotiales	Sclerotiniaceae	Pseudociboria		litter_saprotroph					leaf/fruit/seed		non-aquatic			filamentous_mycelium	apothecium_(hymenium_on_surface)	smooth					#N/A	#N/A	#N/A	#N/A	#N/A	#N/A	#N/A	#N/A	#N/A	#N/A	#N/A	#N/A	#N/A	#N/A	#N/A	#N/A	#N/A	#N/A
OTU0733	Phallus	0	0.00164818	jrk07335	Ascomycota	Leotiomycetes	Helotiales	Sclerotiniaceae	Pycnopeziza		litter_saprotroph	plant_pathogen	plant_pathogen_weak		leaf/fruit/seed_pathogen	leaf/fruit/seed		non-aquatic			filamentous_mycelium	apothecium_(hymenium_on_surface)	smooth					0	soil_saprotroph	0	0	0	0	soil	0	non-aquatic	0	0	filamentous_mycelium	phalloid	gel	0	0	0	0
OTU0734	Lyomyces	0	0.00164818	jrk07471	Ascomycota	Leotiomycetes	Helotiales	Sclerotiniaceae	Redheadia		plant_pathogen				leaf/fruit/seed_pathogen			non-aquatic			filamentous_mycelium	apothecium_(hymenium_on_surface)	smooth					0	wood_saprotroph	0	0	0	0	wood	white_rot	non-aquatic	0	0	filamentous_mycelium	corticioid	smooth	0	0	0	0
OTU0735	Candida	0.000842566	0	jrk10159	Ascomycota	Leotiomycetes	Helotiales	Sclerotiniaceae	Sclerencoelia		wood_saprotroph		wood_pathogen_one_species			wood		non-aquatic			filamentous_mycelium	apothecium_(hymenium_on_surface)	smooth					0	nectar/tap_saprotroph	0	0	0	0	sugar-rich_substrates	0	partly_aquatic	animal-associated/opportunistic_human_parasite	0	yeast	none	none	0	0	0	0
OTU0736	Exophiala	0.000842566	0	jrk07889	Ascomycota	Leotiomycetes	Helotiales	Sclerotiniaceae	Scleromitrula		plant_pathogen				leaf/fruit/seed_pathogen			non-aquatic			filamentous_mycelium	apothecium_(hymenium_on_surface)	smooth					0	animal_parasite	litter_saprotroph	0	root_endophyte_dark_septate	root-associated	leaf/fruit/seed,animal_material	0	partly_aquatic	animal_parasite/opportunistic_human_parasite	0	dimorphic_yeast	0	0	0	0	0	0
OTU0737	Candida	0.000842566	0	jrk07899	Ascomycota	Leotiomycetes	Helotiales	Sclerotiniaceae	Sclerotinia		plant_pathogen	litter_saprotroph			leaf/fruit/seed_pathogen	leaf/fruit/seed		non-aquatic			filamentous_mycelium	apothecium_(hymenium_on_surface)	smooth					0	nectar/tap_saprotroph	0	0	0	0	sugar-rich_substrates	0	partly_aquatic	animal-associated/opportunistic_human_parasite	0	yeast	none	none	0	0	0	0
OTU0738	Candida	0.000842566	0	jrk07951	Ascomycota	Leotiomycetes	Helotiales	Sclerotiniaceae	Seaverinia		plant_pathogen	unsepcified_saprotroph			root_pathogen	roots		non-aquatic			filamentous_mycelium	apothecium_(hymenium_on_surface)	smooth					0	nectar/tap_saprotroph	0	0	0	0	sugar-rich_substrates	0	partly_aquatic	animal-associated/opportunistic_human_parasite	0	yeast	none	none	0	0	0	0
OTU0739	Candida	0.000842566	0	jrk08000	Ascomycota	Leotiomycetes	Helotiales	Sclerotiniaceae	Septotinia		plant_pathogen				leaf/fruit/seed_pathogen			non-aquatic			filamentous_mycelium	apothecium_(hymenium_on_surface)	smooth					0	nectar/tap_saprotroph	0	0	0	0	sugar-rich_substrates	0	partly_aquatic	animal-associated/opportunistic_human_parasite	0	yeast	none	none	0	0	0	0
OTU0740	Absidia	0	0.00164818	jrk09883	Ascomycota	Leotiomycetes	Helotiales	Sclerotiniaceae	Streptobotrys	synonym of Streptotinia	plant_pathogen				leaf/fruit/seed_pathogen			non-aquatic			filamentous_mycelium							0	soil_saprotroph	0	0	0	0	soil	mold	partly_aquatic	0	0	filamentous_mycelium	none	none	0	0	0	0
OTU0741	Ascomycota genus Incertae sedis	0	0.00164818	jrk08451	Ascomycota	Leotiomycetes	Helotiales	Sclerotiniaceae	Streptotinia		plant_pathogen				leaf/fruit/seed_pathogen			non-aquatic			filamentous_mycelium	apothecium_(hymenium_on_surface)	smooth					#N/A	#N/A	#N/A	#N/A	#N/A	#N/A	#N/A	#N/A	#N/A	#N/A	#N/A	#N/A	#N/A	#N/A	#N/A	#N/A	#N/A	#N/A
OTU0742		0.000842566	0	jrk08466	Ascomycota	Leotiomycetes	Helotiales	Sclerotiniaceae	Stromatinia		plant_pathogen				other_plant_pathogen			non-aquatic			filamentous_mycelium	apothecium_(hymenium_on_surface)	smooth					#N/A	#N/A	#N/A	#N/A	#N/A	#N/A	#N/A	#N/A	#N/A	#N/A	#N/A	#N/A	#N/A	#N/A	#N/A	#N/A	#N/A	#N/A
OTU0743		0.000842566	0	jrk08890	Ascomycota	Leotiomycetes	Helotiales	Sclerotiniaceae	Torrendiella		litter_saprotroph	foliar_endophyte		foliar_endophyte		leaf/fruit/seed		non-aquatic			filamentous_mycelium	apothecium_(hymenium_on_surface)	smooth					#N/A	#N/A	#N/A	#N/A	#N/A	#N/A	#N/A	#N/A	#N/A	#N/A	#N/A	#N/A	#N/A	#N/A	#N/A	#N/A	#N/A	#N/A
OTU0744	Peniophora	0.000842566	0	jrk09221	Ascomycota	Leotiomycetes	Helotiales	Sclerotiniaceae	Valdensia		plant_pathogen				leaf/fruit/seed_pathogen			non-aquatic			filamentous_mycelium	apothecium_(hymenium_on_surface)	smooth					0	wood_saprotroph	plant_pathogen	0	0	wood_pathogen	wood	white_rot	partly_aquatic	0	0	filamentous_mycelium	corticioid	smooth	0	0	0	0
OTU0745	Fungi genus Incertae sedis	0.000842566	0	jrk09885	Ascomycota	Leotiomycetes	Helotiales	Sclerotiniaceae	Valdensinia		plant_pathogen				leaf/fruit/seed_pathogen			non-aquatic			filamentous_mycelium	apothecium_(hymenium_on_surface)	smooth					#N/A	#N/A	#N/A	#N/A	#N/A	#N/A	#N/A	#N/A	#N/A	#N/A	#N/A	#N/A	#N/A	#N/A	#N/A	#N/A	#N/A	#N/A
OTU0746	Rhizophagus	0	0.00164818	jrk09886	Ascomycota	Leotiomycetes	Helotiales	Sclerotiniaceae	Verrucobotrys	synonym of Seaverinia	plant_pathogen				leaf/fruit/seed_pathogen			non-aquatic			filamentous_mycelium							0	arbuscular_mycorrhizal	root-associated	0	root_endophyte	0	0	0	0	0	0	filamentous_mycelium	none	none	0	0	0	0
OTU0747	Syncephalastrum	0.000842566	0	jrk03371	Ascomycota	Leotiomycetes	Helotiales	Tricladiaceae	Geniculospora		litter_saprotroph					leaf/fruit/seed		partly_aquatic			filamentous_mycelium							0	soil_saprotroph	animal_parasite	0	0	0	soil,animal_material	mold	partly_aquatic	0	0	filamentous_mycelium	none	none	0	0	0	0
OTU0748	Exophiala	0.000842566	0	jrk03527	Ascomycota	Leotiomycetes	Helotiales	Tricladiaceae	Graddonia		wood_saprotroph					wood		partly_freshwater_(partly_non-aquatic)			filamentous_mycelium	apothecium_(hymenium_on_surface)	smooth					0	animal_parasite	litter_saprotroph	0	root_endophyte_dark_septate	root-associated	leaf/fruit/seed,animal_material	0	partly_aquatic	animal_parasite/opportunistic_human_parasite	0	dimorphic_yeast	0	0	0	0	0	0
OTU0749	Scedosporium	0.000842566	0	jrk03639	Ascomycota	Leotiomycetes	Helotiales	Tricladiaceae	Halenospora		wood_saprotroph	litter_saprotroph				wood,leaf/fruit/seed		marine			filamentous_mycelium							0	soil_saprotroph	animal_parasite	0	0	0	soil,animal_material	0	non-aquatic	opportunistic_human_parasite	0	filamentous_mycelium	cleistothecium_(closed,_spherical)	closed	0	0	0	0
OTU0750	Scedosporium	0.000842566	0	jrk05387	Ascomycota	Leotiomycetes	Helotiales	Tricladiaceae	Mycofalcella		litter_saprotroph					leaf/fruit/seed		partly_aquatic			filamentous_mycelium							0	soil_saprotroph	animal_parasite	0	0	0	soil,animal_material	0	non-aquatic	opportunistic_human_parasite	0	filamentous_mycelium	cleistothecium_(closed,_spherical)	closed	0	0	0	0
OTU0751	Trametes	0.000842566	0	jrk09032	Ascomycota	Leotiomycetes	Helotiales	Tricladiaceae	Tricladium		litter_saprotroph					leaf/fruit/seed		partly_freshwater_(partly_non-aquatic)			filamentous_mycelium							0	wood_saprotroph	0	wood_pathogen_some_species	0	0	wood	white_rot	partly_aquatic	0	0	filamentous_mycelium	polyporoid	poroid	0	0	0	0
OTU0752	Capronia	0.000842566	0	jrk09236	Ascomycota	Leotiomycetes	Helotiales	Vandijckellaceae	Vandijckella		soil_saprotroph					soil		non-aquatic			filamentous_mycelium	none	none					0	soil_saprotroph	root_endophyte_dark_septate	mycoparasite_some_species,animal_pathogen_some_species	root_endophyte_dark_septate	0	soil	0	partly_aquatic	animal_parasite/opportunistic_human_parasite	0	dimorphic_yeast	0	0	0	0	0	0
OTU0753	Hyphodontia	0	0.00164818	jrk07817	Ascomycota	Leotiomycetes	Leotiales	Cochlearomycetaceae	Satchmopsis		litter_saprotroph					leaf/fruit/seed		non-aquatic			filamentous_mycelium							0	wood_saprotroph	0	0	0	0	wood	white_rot	non-aquatic	0	0	filamentous_mycelium	corticioid	smooth	0	0	0	0
OTU0754	Aureobasidium	0.000842566	0	jrk05202	Ascomycota	Leotiomycetes	Leotiales	Leotiaceae	Miniancora		litter_saprotroph					leaf/fruit/seed		freshwater			filamentous_mycelium	none	none					0	sooty_mold	litter_saprotroph	hyperviariable	foliar_endophyte	leaf/fruit/seed_pathogen	leaf/fruit/seed,roots,animal_material,sugar-rich_substrates	0	partly_aquatic	animal_parasite	0	dimorphic_yeast	0	0	0	0	0	0
OTU0755	Capronia	0.000842566	0	jrk03201	Ascomycota	Leotiomycetes	Leotiales	Leotiales family incertae sedis	Flagellospora		litter_saprotroph					leaf/fruit/seed		partly_aquatic			filamentous_mycelium	none	none					0	soil_saprotroph	root_endophyte_dark_septate	mycoparasite_some_species,animal_pathogen_some_species	root_endophyte_dark_septate	0	soil	0	partly_aquatic	animal_parasite/opportunistic_human_parasite	0	dimorphic_yeast	0	0	0	0	0	0
OTU0756	Exophiala	0	0.00164818	jrk03003	Ascomycota	Leotiomycetes	Leotiales	Mniaeciaceae	Epithamnolia		lichen_parasite	fungal_decomposer				fungal_material,algal_material		non-aquatic			filamentous_mycelium	none	none					0	animal_parasite	litter_saprotroph	0	root_endophyte_dark_septate	root-associated	leaf/fruit/seed,animal_material	0	partly_aquatic	animal_parasite/opportunistic_human_parasite	0	dimorphic_yeast	0	0	0	0	0	0
OTU0757	Exophiala	0	0.00164818	jrk01358	Ascomycota	Leotiomycetes	Leotiales	Tympanidaceae	Calyptrozyma		unspecified_saprotroph								opportunistic_human_parasite		yeast	none	none					0	animal_parasite	litter_saprotroph	0	root_endophyte_dark_septate	root-associated	leaf/fruit/seed,animal_material	0	partly_aquatic	animal_parasite/opportunistic_human_parasite	0	dimorphic_yeast	0	0	0	0	0	0
OTU0758	Exophiala	0	0.00164818	jrk02242	Ascomycota	Leotiomycetes	Leotiales	Tympanidaceae	Culicidospora		litter_saprotroph					leaf/fruit/seed		partly_aquatic			filamentous_mycelium							0	animal_parasite	litter_saprotroph	0	root_endophyte_dark_septate	root-associated	leaf/fruit/seed,animal_material	0	partly_aquatic	animal_parasite/opportunistic_human_parasite	0	dimorphic_yeast	0	0	0	0	0	0
OTU0759	Phanerochaete	0	0.00164818	jrk02436	Ascomycota	Leotiomycetes	Leotiomycetes order incertae sedis	Deltopyxidaceae	Deltopyxis		wood_saprotroph					wood		non-aquatic			filamentous_mycelium	apothecium_(hymenium_on_surface)	smooth					0	wood_saprotroph	0	0	0	0	wood	white_rot	non-aquatic	0	0	filamentous_mycelium	corticioid	smooth	0	0	0	0
OTU0760	Exophiala	0	0.00164818	jrk09847	Ascomycota	Leotiomycetes	Leotiomycetes order incertae sedis	Deltopyxidaceae	Phaeopyxis		lichen_parasite	fungal_decomposer				fungal_material,algal_material		non-aquatic			filamentous_mycelium	apothecium_(hymenium_on_surface)	smooth					0	animal_parasite	litter_saprotroph	0	root_endophyte_dark_septate	root-associated	leaf/fruit/seed,animal_material	0	partly_aquatic	animal_parasite/opportunistic_human_parasite	0	dimorphic_yeast	0	0	0	0	0	0
OTU0761	Pleurotus	0.000842566	0	jrk09079	Ascomycota	Leotiomycetes	Leotiomycetes order incertae sedis	Leotiomycetes family incertae sedis	Trullula		wood_saprotroph					wood		non-aquatic			filamentous_mycelium	none	none					0	wood_saprotroph	nematophagous	0	0	wood_pathogen	wood,animal_material	white_rot	partly_aquatic	nematophagous	0	filamentous_mycelium	agaricoid	gills	0	0	0	0
OTU0762	Pluteus	0	0.00164818	jrk05127	Ascomycota	Leotiomycetes	Micraspidales	Micraspidaceae	Micraspis		litter_saprotroph	foliar_endophyte		foliar_endophyte		leaf/fruit/seed		non-aquatic		Pinaceae_cones	filamentous_mycelium	apothecium_(hymenium_on_surface)	smooth					0	litter_saprotroph	0	wood_saprotroph_many_species	0	0	leaf/fruit/seed	white_rot	non-aquatic	0	0	filamentous_mycelium	agaricoid	gills	0	0	0	0
OTU0763	Fungi genus Incertae sedis	0.000842566	0	jrk01321	Ascomycota	Leotiomycetes	Phacidiales	Helicogoniaceae	Calloriopsis		mycoparasite	fungal_decomposer				fungal_material		non-aquatic			filamentous_mycelium	apothecium_(hymenium_on_surface)	smooth					#N/A	#N/A	#N/A	#N/A	#N/A	#N/A	#N/A	#N/A	#N/A	#N/A	#N/A	#N/A	#N/A	#N/A	#N/A	#N/A	#N/A	#N/A
OTU0764	Cephalotrichum	0	0.00164818	jrk02862	Ascomycota	Leotiomycetes	Phacidiales	Helicogoniaceae	Eleutheromycella		mycoparasite	fungal_decomposer				fungal_material		non-aquatic			filamentous_mycelium	none	none					0	soil_saprotroph	0	0	0	0	soil	0	partly_aquatic	0	0	filamentous_mycelium	none	none	0	0	0	0
OTU0765	Spiromastigoides	0	0.00164818	jrk02863	Ascomycota	Leotiomycetes	Phacidiales	Helicogoniaceae	Eleutheromyces		mycoparasite	fungal_decomposer				fungal_material		non-aquatic			dimorphic_yeast	none	none					0	soil_saprotroph	0	0	0	0	soil	0	non-aquatic	0	0	filamentous_mycelium	0	0	0	0	0	0
OTU0766	Kurtzmanomyces	0.000842566	0	jrk03350	Ascomycota	Leotiomycetes	Phacidiales	Helicogoniaceae	Gelatinipulvinella		mycoparasite	fungal_decomposer				fungal_material		non-aquatic			filamentous_mycelium	apothecium_(hymenium_on_surface)	smooth					0	unspecified_saprotroph	0	0	0	0	0	0	0	0	0	dimorphic_yeast	0	0	0	0	0	0
OTU0767	Chaenothecopsis	0.000842566	0	jrk03361	Ascomycota	Leotiomycetes	Phacidiales	Helicogoniaceae	Geltingia		lichen_parasite	fungal_decomposer				fungal_material,algal_material		non-aquatic			filamentous_mycelium	apothecium_(hymenium_on_surface)	smooth					0	unspecified_saprotroph	0	resin_saprotroph_some_species,lichen_parasite_some_species	0	0	0	0	non-aquatic	0	0	filamentous_mycelium	mazaedium_(pushpin-like)	other	0	0	0	0
OTU0768	Niesslia	0	0.00164818	jrk03745	Ascomycota	Leotiomycetes	Phacidiales	Helicogoniaceae	Helicogonium		mycoparasite	fungal_decomposer				fungal_material		non-aquatic			yeast	other						0	litter_saprotroph	dung_saprotroph	hypervariable	0	0	wood,leaf/fruit/seed,soil,dung	0	0	0	0	filamentous_mycelium	perithecium_(hymenium_hidden,_narrow_opening)	closed	0	0	0	0
OTU0769	Cyphellophora	0	0.00164818	jrk04798	Ascomycota	Leotiomycetes	Phacidiales	Phacidiaceae	Lophophacidium		plant_pathogen				leaf/fruit/seed_pathogen			non-aquatic			filamentous_mycelium							0	litter_saprotroph	animal_parasite	0	0	0	leaf/fruit/seed,animal_material	0	non-aquatic	animal_parasite/opportunistic_human_parasite	0	dimorphic_yeast	none	none	0	0	0	0
OTU0770	Neophysalospora	0.000842566	0	jrk02238	Ascomycota	Leotiomycetes	Rhytismatales	Cudoniaceae	Cudonia		litter_saprotroph	soil_saprotroph				leaf/fruit/seed,soil		non-aquatic			filamentous_mycelium	apothecium_(hymenium_on_surface)	smooth					0	plant_pathogen	foliar_endophyte	0	foliar_endophyte	leaf/fruit/seed_pathogen	leaf/fruit/seed	0	non-aquatic	0	0	filamentous_mycelium	perithecium_(hymenium_hidden,_narrow_opening)	closed	0	0	0	0
OTU0771	Mucor	0.000842566	0	jrk08169	Ascomycota	Leotiomycetes	Rhytismatales	Cudoniaceae	Spathularia		litter_saprotroph	soil_saprotroph				leaf/fruit/seed,soil		non-aquatic			filamentous_mycelium	apothecium_(hymenium_on_surface)	smooth					0	soil_saprotroph	0	0	0	0	soil	mold	partly_aquatic	opportunistic_human_parasite	0	filamentous_mycelium	none	none	0	0	0	0
OTU0772	Sporidiobolaceae genus Incertae sedis	0.000842566	0	jrk07085	Ascomycota	Leotiomycetes	Rhytismatales	Rhytismataceae	Pseudographis		wood_saprotroph					wood		non-aquatic			filamentous_mycelium	apothecium_(hymenium_on_surface)	smooth					#N/A	#N/A	#N/A	#N/A	#N/A	#N/A	#N/A	#N/A	#N/A	#N/A	#N/A	#N/A	#N/A	#N/A	#N/A	#N/A	#N/A	#N/A
OTU0773	Hyphodontia	0.000842566	0	jrk00491	Ascomycota	Leotiomycetes	Rhytismatales	Rhytismatales family incertae sedis	Apiodiscus		litter_saprotroph					leaf/fruit/seed		non-aquatic		Acer	filamentous_mycelium	apothecium_(hymenium_on_surface)	smooth					0	wood_saprotroph	0	0	0	0	wood	white_rot	non-aquatic	0	0	filamentous_mycelium	corticioid	smooth	0	0	0	0
OTU0774	Coprinopsis	0.000842566	0	jrk01102	Ascomycota	Leotiomycetes	Rhytismatales	Rhytismatales family incertae sedis	Bonanseja		litter_saprotroph					leaf/fruit/seed		non-aquatic		Acer	filamentous_mycelium	apothecium_(hymenium_on_surface)	smooth					0	soil_saprotroph	0	0	0	0	soil	0	non-aquatic	0	0	filamentous_mycelium	agaricoid	gills	0	0	0	0
OTU0775	Cyberlindnera	0.000842566	0	jrk02607	Ascomycota	Leotiomycetes	Rhytismatales	Rhytismatales family incertae sedis	Didymascus		plant_pathogen				leaf/fruit/seed_pathogen			non-aquatic		Acer	filamentous_mycelium	apothecium_(hymenium_on_surface)	smooth					0	nectar/tap_saprotroph	animal_parasite	0	0	0	animal_material,sugar-rich_substrates	0	partly_aquatic	animal_parasite/opportunistic_human_parasite	0	yeast	none	none	0	0	0	0
OTU0776	Hyphodermella	0	0.00164818	jrk03691	Ascomycota	Leotiomycetes	Rhytismatales	Rhytismatales family incertae sedis	Haplophyse		plant_pathogen				leaf/fruit/seed_pathogen			non-aquatic		Acer	filamentous_mycelium	apothecium_(hymenium_on_surface)	smooth					0	wood_saprotroph	0	0	0	0	wood	white_rot	non-aquatic	0	0	filamentous_mycelium	corticioid	smooth	0	0	0	0
OTU0777	Fungi genus Incertae sedis	0.000842566	0	jrk04179	Ascomycota	Leotiomycetes	Rhytismatales	Rhytismatales family incertae sedis	Irydyonia		plant_pathogen				leaf/fruit/seed_pathogen			non-aquatic		Acer	filamentous_mycelium	apothecium_(hymenium_on_surface)	smooth					#N/A	#N/A	#N/A	#N/A	#N/A	#N/A	#N/A	#N/A	#N/A	#N/A	#N/A	#N/A	#N/A	#N/A	#N/A	#N/A	#N/A	#N/A
OTU0778	Fungi genus Incertae sedis	0.000842566	0	jrk04467	Ascomycota	Leotiomycetes	Rhytismatales	Rhytismatales family incertae sedis	Laquearia		litter_saprotroph					leaf/fruit/seed		non-aquatic		Acer	filamentous_mycelium	apothecium_(hymenium_on_surface)	smooth					#N/A	#N/A	#N/A	#N/A	#N/A	#N/A	#N/A	#N/A	#N/A	#N/A	#N/A	#N/A	#N/A	#N/A	#N/A	#N/A	#N/A	#N/A
OTU0779	Herpotrichiellaceae genus Incertae sedis	0	0.00164818	jrk05424	Ascomycota	Leotiomycetes	Rhytismatales	Rhytismatales family incertae sedis	Mycosymbioces		mycoparasite	fungal_decomposer				fungal_material		non-aquatic			filamentous_mycelium	apothecium_(hymenium_on_surface)	smooth					#N/A	#N/A	#N/A	#N/A	#N/A	#N/A	#N/A	#N/A	#N/A	#N/A	#N/A	#N/A	#N/A	#N/A	#N/A	#N/A	#N/A	#N/A
OTU0780	Cladophialophora	0	0.00164818	jrk05826	Ascomycota	Leotiomycetes	Rhytismatales	Rhytismatales family incertae sedis	Nymanomyces		plant_pathogen				leaf/fruit/seed_pathogen			non-aquatic		Acer	filamentous_mycelium	apothecium_(hymenium_on_surface)	smooth					0	soil_saprotroph	root_endophyte_dark_septate	mycoparasite_some_species,animal_pathogen_some_species	root_endophyte_dark_septate	0	soil	0	non-aquatic	animal_parasite/opportunistic_human_parasite	0	dimorphic_yeast	0	0	0	0	0	0
OTU0781	Inocybe	0	0.00164818	jrk07239	Ascomycota	Leotiomycetes	Rhytismatales	Rhytismatales family incertae sedis	Pseudotrochila		plant_pathogen				leaf/fruit/seed_pathogen			non-aquatic		Rhododendron	filamentous_mycelium	apothecium_(hymenium_on_surface)	smooth					0	ectomycorrhizal	0	0	0	0	0	0	non-aquatic	0	0	filamentous_mycelium	agaricoid	gills	short-distance_delicate	/inocybe	0	0
OTU0782	Nectria	0	0.00164818	jrk03930	Ascomycota	Leotiomycetes	Rhytismatales	Triblidiaceae	Huangshania		wood_saprotroph					wood		non-aquatic			filamentous_mycelium	apothecium_(hymenium_on_surface)	smooth					0	plant_pathogen	litter_saprotroph	hypervariable	foliar_endophyte	leaf/fruit/seed_pathogen	wood,leaf/fruit/seed,roots,soil	0	0	0	0	filamentous_mycelium	perithecium_(hymenium_hidden,_narrow_opening)	closed	0	0	0	0
OTU0783	Coprinellus	0.000842566	0	jrk08957	Ascomycota	Leotiomycetes	Rhytismatales	Triblidiaceae	Triblidium		wood_saprotroph					wood		non-aquatic			filamentous_mycelium	apothecium_(hymenium_on_surface)	smooth					0	soil_saprotroph	0	0	0	0	soil	0	partly_aquatic	0	0	filamentous_mycelium	agaricoid	gills	0	0	0	0
OTU0784	Chrysosporium	0	0.00164818	jrk00999	Ascomycota	Leotiomycetes	Thelebolales	Pseudeurotiaceae	Bettsia		animal_parasite	animal_decomposer				animal_material		non-aquatic	arthropod-associated	Apis	filamentous_mycelium	cleistothecium_(closed,_spherical)	closed					0	wood_saprotroph	0	0	0	0	wood	soft_rot	partly_aquatic	0	0	filamentous_mycelium	0	0	0	0	0	0
OTU0785	Fungi genus Incertae sedis	0.000842566	0	jrk03377	Ascomycota	Leotiomycetes	Thelebolales	Pseudeurotiaceae	Geomyces		soil_saprotroph					soil		partly_aquatic			filamentous_mycelium	cleistothecium_(closed,_spherical)	closed					#N/A	#N/A	#N/A	#N/A	#N/A	#N/A	#N/A	#N/A	#N/A	#N/A	#N/A	#N/A	#N/A	#N/A	#N/A	#N/A	#N/A	#N/A
OTU0786	Shanorella	0	0.00164818	jrk03604	Ascomycota	Leotiomycetes	Thelebolales	Pseudeurotiaceae	Gymnostellatospora		soil_saprotroph					soil		non-aquatic			filamentous_mycelium	cleistothecium_(closed,_spherical)	closed					0	soil_saprotroph	0	0	0	0	soil	0	non-aquatic	0	0	filamentous_mycelium	cleistothecium_(closed,_spherical)	closed	0	0	0	0
OTU0787	Hypocreales genus Incertae sedis	0	0.00164818	jrk06996	Ascomycota	Leotiomycetes	Thelebolales	Pseudeurotiaceae	Pseudeurotium		dung_saprotroph	soil_saprotroph				soil,dung		partly_aquatic			filamentous_mycelium	cleistothecium_(closed,_spherical)	closed					#N/A	#N/A	#N/A	#N/A	#N/A	#N/A	#N/A	#N/A	#N/A	#N/A	#N/A	#N/A	#N/A	#N/A	#N/A	#N/A	#N/A	#N/A
OTU0788	Cuniculitrema	0.000842566	0	jrk07086	Ascomycota	Leotiomycetes	Thelebolales	Pseudeurotiaceae	Pseudogymnoascus		soil_saprotroph					soil		partly_aquatic	opportunistic_animal_parasite_G._destructans		filamentous_mycelium	cleistothecium_(closed,_spherical)	closed					synonym of Sterigmatosporidium	mycoparasite	fungal_decomposer	0	0	0	fungal_material	0	non-aquatic	0	0	dimorphic_yeast	0	0	0	0	0	0
OTU0789	Hypomyces	0	0.00164818	jrk03521	Ascomycota	Leotiomycetes	Thelebolales	Thelebolales family incertae sedis	Gorgomyces		litter_saprotroph					leaf/fruit/seed		partly_freshwater_(partly_non-aquatic)			filamentous_mycelium							0	mycoparasite	fungal_decomposer	0	0	0	fungal_material	0	0	0	0	filamentous_mycelium	perithecium_(hymenium_hidden,_narrow_opening)	closed	0	0	0	0
OTU0790	Exophiala	0.000842566	0	jrk06241	Ascomycota	Leotiomycetes	Thelebolales	Thelebolales family incertae sedis	Patinella		wood_saprotroph					wood		non-aquatic			filamentous_mycelium	apothecium_(hymenium_on_surface)	smooth					0	animal_parasite	litter_saprotroph	0	root_endophyte_dark_septate	root-associated	leaf/fruit/seed,animal_material	0	partly_aquatic	animal_parasite/opportunistic_human_parasite	0	dimorphic_yeast	0	0	0	0	0	0
OTU0791	Peristomialis	0	0.00164818	jrk11164	Ascomycota	Sordariomycetes	Hypocreales	Hypocreales family incertae sedis	Saksenamyces		plant_pathogen				leaf/fruit/seed_pathogen					Shorea	filamentous_mycelium							0	litter_saprotroph	0	0	0	0	leaf/fruit/seed	0	0	0	0	filamentous_mycelium	perithecium_(hymenium_hidden,_narrow_opening)	closed	0	0	0	0
OTU0792	Paecilomyces	0.000842566	0	jrk07138	Ascomycota	Sordariomycetes	Pleosporales	Roussoellaceae	Pseudoneoconiothyrium		wood_saprotroph					wood		non-aquatic			filamentous_mycelium	perithecium_(hymenium_hidden,_narrow_opening)	closed					0	foliar_endophyte	litter_saprotroph	0	foliar_endophyte	0	leaf/fruit/seed,animal_material	soft_rot	partly_aquatic	invertebrate_parasite	0	filamentous_mycelium	0	0	0	0	0	0
OTU0793	Fungi genus Incertae sedis	0	0.00164818	jrk03136	Ascomycota	Sordariomycetes	Xylariales	Fasciatisporaceae	Fasciatispora		litter_saprotroph					leaf/fruit/seed		partly_aquatic			filamentous_mycelium	perithecium_(hymenium_hidden,_narrow_opening)	closed					#N/A	#N/A	#N/A	#N/A	#N/A	#N/A	#N/A	#N/A	#N/A	#N/A	#N/A	#N/A	#N/A	#N/A	#N/A	#N/A	#N/A	#N/A
OTU0794	Ochroconis	0.000842566	0	jrk09164	Basidiomycota	Agaricomycetes	Agaricales	Agaricales family incertae sedis	Uncobasidium		wood_saprotroph					wood	white_rot	non-aquatic			filamentous_mycelium	corticioid	smooth					0	animal_parasite	plant_pathogen	0	0	leaf/fruit/seed_pathogen	leaf/fruit/seed,animal_material	0	partly_aquatic	opportunistic_human_parasite	0	filamentous_mycelium	perithecium_(hymenium_hidden,_narrow_opening)	closed	0	0	0	0
OTU0795	Arcticomyces	0.000842566	0	jrk00473	Basidiomycota	Agaricomycetes	Agaricales	Radulomycetaceae	Aphanobasidium		wood_saprotroph					wood	white_rot	non-aquatic			filamentous_mycelium	corticioid	smooth					0	plant_pathogen	0	0	no_endophytic_capacity	leaf/fruit/seed_pathogen	0	0	non-aquatic	0	0	filamentous_mycelium	none	none	0	0	0	0
OTU0796	Hirsutella	0	0.00164818	extra taxons new Karl Henrik and Jenni	Basidiomycota	Agaricomycetes	Agaricales	Radulomycetaceae	Lepidomyces		wood_saprotroph					wood	white_rot	non-aquatic			filamentous_mycelium	corticioid	smooth					0	animal_parasite	animal_decomposer	0	0	0	animal_material	0	non-aquatic	invertebrate_parasite	0	filamentous_mycelium	0	0	0	0	0	0
OTU0797	Penicillium	0	0.00164818	jrk07421	Basidiomycota	Agaricomycetes	Agaricales	Radulomycetaceae	Radulomyces		wood_saprotroph					wood	white_rot	non-aquatic			filamentous_mycelium	corticioid	smooth					0	unspecified_saprotroph	foliar_endophyte	toxin-producing,animal_parasite_some_species,mycoparasite_some_species	foliar_endophyte	0	soil	mold	partly_aquatic	opportunistic_human_parasite	0	filamentous_mycelium	0	0	0	0	0	0
OTU0798	Blastobotrys	0.000842566	0	jrk07423	Basidiomycota	Agaricomycetes	Agaricales	Radulomycetaceae	Radulotubus		wood_saprotroph					wood	white_rot	non-aquatic			filamentous_mycelium	corticioid	poroid					0	nectar/tap_saprotroph	0	0	0	0	sugar-rich_substrates	0	partly_aquatic	animal-associated	0	yeast	none	none	0	0	0	0
OTU0799	Ascomycota genus Incertae sedis	0	0.00164818	jrk05798	Basidiomycota	Agaricomycetes	Agaricomycetes order incertae sedis	Agaricomycetes family incertae sedis	Nothocorticium		wood_saprotroph					wood	white_rot	non-aquatic			filamentous_mycelium	corticioid	smooth					#N/A	#N/A	#N/A	#N/A	#N/A	#N/A	#N/A	#N/A	#N/A	#N/A	#N/A	#N/A	#N/A	#N/A	#N/A	#N/A	#N/A	#N/A
OTU0800	Chrysosporium	0	0.00164818	jrk01183	Basidiomycota	Agaricomycetes	Hymenochaetales	Hymenochaetales family incertae sedis	Bridgeoporus		wood_saprotroph					wood		non-aquatic			filamentous_mycelium	polyporoid	poroid					0	wood_saprotroph	0	0	0	0	wood	soft_rot	partly_aquatic	0	0	filamentous_mycelium	0	0	0	0	0	0
OTU0801	Penicillium	0.000842566	0	jrk07834	Basidiomycota	Agaricomycetes	Hymenochaetales	Hymenochaetales family incertae sedis	Sceptrulum		wood_saprotroph					wood	white_rot	non-aquatic			filamentous_mycelium	corticioid	smooth					0	unspecified_saprotroph	foliar_endophyte	toxin-producing,animal_parasite_some_species,mycoparasite_some_species	foliar_endophyte	0	soil	mold	partly_aquatic	opportunistic_human_parasite	0	filamentous_mycelium	0	0	0	0	0	0
OTU0802	Phialocephala	0.000842566	0	jrk08117	Basidiomycota	Agaricomycetes	Hymenochaetales	Hymenochaetales family incertae sedis	Skvortzovia		wood_saprotroph					wood	white_rot	non-aquatic			filamentous_mycelium	corticioid	hydnoid					0	soil_saprotroph	root_endophyte	0	root_endophyte_dark_septate	root-associated	roots,soil	0	non-aquatic	0	0	filamentous_mycelium	apothecium_(hymenium_on_surface)	smooth	0	0	0	0
OTU0803	Scutellinia	0.000842566	0	jrk05867	Basidiomycota	Agaricomycetes	Hymenochaetales	Rickenellaceae	Odonticium		wood_saprotroph					wood	white_rot	non-aquatic			filamentous_mycelium	corticioid	hydnoid					0	wood_saprotroph	soil_saprotroph	0	0	0	wood,leaf/fruit/seed,soil	0	partly_freshwater_(partly_non-aquatic)	0	0	filamentous_mycelium	apothecium_(hymenium_on_surface)	smooth	0	0	0	0
OTU0804	Penicillium	0	0.00164818	jrk04174	Basidiomycota	Agaricomycetes	Polyporales	Irpicaceae	Irpex		wood_saprotroph					wood	white_rot	partly_aquatic			filamentous_mycelium	corticioid	hydnoid					0	unspecified_saprotroph	foliar_endophyte	toxin-producing,animal_parasite_some_species,mycoparasite_some_species	foliar_endophyte	0	soil	mold	partly_aquatic	opportunistic_human_parasite	0	filamentous_mycelium	0	0	0	0	0	0
OTU0805	Fungi genus Incertae sedis	0	0.00164818	jrk07625	Basidiomycota	Agaricomycetes	Russulales	Bondarzewiaceae	Rigidoporopsis		wood_saprotroph					wood	white_rot	non-aquatic			filamentous_mycelium	corticioid	poroid					#N/A	#N/A	#N/A	#N/A	#N/A	#N/A	#N/A	#N/A	#N/A	#N/A	#N/A	#N/A	#N/A	#N/A	#N/A	#N/A	#N/A	#N/A
OTU0806	Acremonium	0	0.00164818	jrk06156	Basidiomycota	Agaricomycetes	Russulales	Peniophoraceae	Baltazaria		litter_saprotroph					leaf/fruit/seed		non-aquatic			filamentous_mycelium	clavarioid	smooth					0	unspecified_saprotroph	foliar_endophyte	hypervariable	foliar_endophyte	leaf/fruit/seed_pathogen	leaf/fruit/seed,soil,dung,animal_material	soft_rot	partly_aquatic	0	0	filamentous_mycelium	0	0	0	0	0	0
OTU0807	Hypocreales genus Incertae sedis	0	0.00164818	jrk09637	Basidiomycota	Agaricomycetes	Russulales	Peniophoraceae	Confertobasidium		wood_saprotroph					wood	white_rot	non-aquatic			filamentous_mycelium	corticioid	smooth					#N/A	#N/A	#N/A	#N/A	#N/A	#N/A	#N/A	#N/A	#N/A	#N/A	#N/A	#N/A	#N/A	#N/A	#N/A	#N/A	#N/A	#N/A
OTU0808	Penicillium	0	0.00164818	jrk04232	Basidiomycota	Agaricostilbomycetes	Agaricostilbales	Jianyuniaceae	Jianyunia		epiphyte	litter_saprotroph				leaf/fruit/seed		non-aquatic			dimorphic_yeast							0	unspecified_saprotroph	foliar_endophyte	toxin-producing,animal_parasite_some_species,mycoparasite_some_species	foliar_endophyte	0	soil	mold	partly_aquatic	opportunistic_human_parasite	0	filamentous_mycelium	0	0	0	0	0	0
OTU0809	Fungi genus Incertae sedis	0.000842566	0	jrk07662	Basidiomycota	Pucciniomycetes	Pucciniales	Gymnosporangiaceae	Roestelia	synonym of Gymnosporangium	plant_pathogen		obligate_plant_pathogen	no_endophytic_capacity	leaf/fruit/seed_pathogen			non-aquatic			filamentous_mycelium	rust	other					#N/A	#N/A	#N/A	#N/A	#N/A	#N/A	#N/A	#N/A	#N/A	#N/A	#N/A	#N/A	#N/A	#N/A	#N/A	#N/A	#N/A	#N/A
OTU0810	Gymnascella	0	0.00164818	jrk03874	Basidiomycota	Pucciniomycetes	Pucciniales	Mikronegeriaceae	Hiratsukamyces	synonym of Elateraecium	plant_pathogen		obligate_plant_pathogen	no_endophytic_capacity	leaf/fruit/seed_pathogen			non-aquatic			filamentous_mycelium	rust	other					0	soil_saprotroph	0	0	0	0	soil	0	partly_aquatic	0	0	filamentous_mycelium	cleistothecium_(closed,_spherical)	closed	0	0	0	0
OTU0811	Penicillium	0	0.00164818	jrk02395	Basidiomycota	Pucciniomycetes	Pucciniales	Phakopsoraceae	Dasturella	synonym of Kweilingia	plant_pathogen		obligate_plant_pathogen	no_endophytic_capacity	leaf/fruit/seed_pathogen			non-aquatic			filamentous_mycelium	rust	other					0	unspecified_saprotroph	foliar_endophyte	toxin-producing,animal_parasite_some_species,mycoparasite_some_species	foliar_endophyte	0	soil	mold	partly_aquatic	opportunistic_human_parasite	0	filamentous_mycelium	0	0	0	0	0	0
OTU0812	Penicillium	0.000842566	0	jrk03256	Basidiomycota	Pucciniomycetes	Pucciniales	Phragmidiaceae	Frommeëlla	synonym of Phragmidium	plant_pathogen		obligate_plant_pathogen	no_endophytic_capacity	leaf/fruit/seed_pathogen			non-aquatic			filamentous_mycelium	rust	other					0	unspecified_saprotroph	foliar_endophyte	toxin-producing,animal_parasite_some_species,mycoparasite_some_species	foliar_endophyte	0	soil	mold	partly_aquatic	opportunistic_human_parasite	0	filamentous_mycelium	0	0	0	0	0	0
OTU0813	Litschauerella	0	0.00164818	jrk02696	Basidiomycota	Pucciniomycetes	Pucciniales	Pucciniaceae	Dipyxis		plant_pathogen		obligate_plant_pathogen	no_endophytic_capacity	leaf/fruit/seed_pathogen			non-aquatic			filamentous_mycelium	rust	other					0	wood_saprotroph	0	0	0	0	wood	white_rot	non-aquatic	0	0	filamentous_mycelium	corticioid	smooth	0	0	0	0
OTU0814	Aspergillus	0.000842566	0	jrk02930	Basidiomycota	Pucciniomycetes	Pucciniales	Pucciniaceae	Endophylloides		plant_pathogen		obligate_plant_pathogen	no_endophytic_capacity	leaf/fruit/seed_pathogen			non-aquatic			filamentous_mycelium	rust	other					0	unspecified_saprotroph	foliar_endophyte	hypervariable,_saprotroph_animal_pathogen_endophyte	foliar_endophyte	0	leaf/fruit/seed,soil,dung,animal_material	mold	partly_aquatic	animal_parasite/opportunistic_human_parasite	0	filamentous_mycelium	0	0	0	0	0	0
OTU0815	Penicillium	0.000842566	0	jrk01944	Basidiomycota	Pucciniomycetes	Pucciniales	Pucciniales family incertae sedis	Coleopuccinia	Nom. illegit.	plant_pathogen		obligate_plant_pathogen	no_endophytic_capacity	leaf/fruit/seed_pathogen			non-aquatic			filamentous_mycelium	rust	other					0	unspecified_saprotroph	foliar_endophyte	toxin-producing,animal_parasite_some_species,mycoparasite_some_species	foliar_endophyte	0	soil	mold	partly_aquatic	opportunistic_human_parasite	0	filamentous_mycelium	0	0	0	0	0	0
OTU0816	Rhodotorula	0.000842566	0	jrk06340	Basidiomycota	Pucciniomycetes	Pucciniales	Pucciniales family incertae sedis	Petersonia	Nom. invalid.	plant_pathogen		obligate_plant_pathogen	no_endophytic_capacity	leaf/fruit/seed_pathogen			non-aquatic			filamentous_mycelium	rust	other					0	unspecified_saprotroph	foliar_endophyte	0	foliar_endophyte	0	0	0	partly_aquatic	opportunistic_human_parasite	0	yeast	none	none	0	0	0	0
OTU0817	Aspergillus	0	0.00164818	jrk06603	Basidiomycota	Pucciniomycetes	Pucciniales	Pucciniales family incertae sedis	Physopella	Nom. illegit.	plant_pathogen		obligate_plant_pathogen	no_endophytic_capacity	leaf/fruit/seed_pathogen			non-aquatic			filamentous_mycelium	rust	other					0	unspecified_saprotroph	foliar_endophyte	hypervariable,_saprotroph_animal_pathogen_endophyte	foliar_endophyte	0	leaf/fruit/seed,soil,dung,animal_material	mold	partly_aquatic	animal_parasite/opportunistic_human_parasite	0	filamentous_mycelium	0	0	0	0	0	0
OTU0818	Chaetothyriales genus Incertae sedis	0.000842566	0	jrk06308	Basidiomycota	Pucciniomycetes	Pucciniales	Pucciniastraceae	Peridermium	synonym of Melampsorella	plant_pathogen		obligate_plant_pathogen	no_endophytic_capacity	leaf/fruit/seed_pathogen			non-aquatic			filamentous_mycelium	rust	other					#N/A	#N/A	#N/A	#N/A	#N/A	#N/A	#N/A	#N/A	#N/A	#N/A	#N/A	#N/A	#N/A	#N/A	#N/A	#N/A	#N/A	#N/A
OTU0819	Pisolithus	0	0.00164818	jrk06853	Ascomycota	Ascomycota class incertae sedis	Ascomycota order incertae sedis	Ascomycota family incertae sedis	Polylobatispora		litter_saprotroph																	0	ectomycorrhizal	0	0	0	0	0	0	non-aquatic	0	0	filamentous_mycelium	gasteroid	closed	long-distance	/pisolithus-scleroderma	0	0
OTU0820	Meniscomyces	0.000842566	0	jrk06382	Ascomycota	Dothideomycetes	Acrospermales	Acrospermaceae	Phaeodactylium	type species not sequenced	plant_pathogen	litter_saprotroph			leaf/fruit/seed_pathogen	leaf/fruit/seed		partly_aquatic			filamentous_mycelium							#N/A	#N/A	#N/A	#N/A	#N/A	#N/A	#N/A	#N/A	#N/A	#N/A	#N/A	#N/A	#N/A	#N/A	#N/A	#N/A	#N/A	#N/A
OTU0821	Colacogloea	0.000842566	0	jrk02817	Ascomycota	Dothideomycetes	Asterinales	Asterinaceae	Echidnodella		epiphyte	litter_saprotroph		foliar_endophyte		leaf/fruit/seed		non-aquatic			filamentous_mycelium	thyrothecium_(tiny_flattened_disc,_aperture_in_the_middle)	closed					0	mycoparasite	fungal_decomposer	0	no_endophytic_capacity	0	fungal_material	0	non-aquatic	0	0	dimorphic_yeast	none	none	0	0	0	0
OTU0822	Aspergillus	0.000842566	0	jrk03636	Ascomycota	Dothideomycetes	Asterinales	Asterinaceae	Halbania		epiphyte	litter_saprotroph		foliar_endophyte		leaf/fruit/seed		non-aquatic			filamentous_mycelium	thyrothecium_(tiny_flattened_disc,_aperture_in_the_middle)	closed					0	unspecified_saprotroph	foliar_endophyte	hypervariable,_saprotroph_animal_pathogen_endophyte	foliar_endophyte	0	leaf/fruit/seed,soil,dung,animal_material	mold	partly_aquatic	animal_parasite/opportunistic_human_parasite	0	filamentous_mycelium	0	0	0	0	0	0
OTU0823	Aspergillus	0.000842566	0	jrk05056	Ascomycota	Dothideomycetes	Asterinales	Asterinaceae	Meliolaster		epiphyte	litter_saprotroph		foliar_endophyte		leaf/fruit/seed		non-aquatic			filamentous_mycelium	thyrothecium_(tiny_flattened_disc,_aperture_in_the_middle)	closed					0	unspecified_saprotroph	foliar_endophyte	hypervariable,_saprotroph_animal_pathogen_endophyte	foliar_endophyte	0	leaf/fruit/seed,soil,dung,animal_material	mold	partly_aquatic	animal_parasite/opportunistic_human_parasite	0	filamentous_mycelium	0	0	0	0	0	0
OTU0824	Abortiporus	0	0.00164818	jrk06176	Ascomycota	Dothideomycetes	Asterinales	Asterinaceae	Parasterinopsis		epiphyte	litter_saprotroph		foliar_endophyte		leaf/fruit/seed		non-aquatic			filamentous_mycelium	thyrothecium_(tiny_flattened_disc,_aperture_in_the_middle)	closed					0	wood_saprotroph	plant_pathogen	0	0	root_pathogen	wood,roots	white_rot	non-aquatic	0	0	filamentous_mycelium	polyporoid	poroid	0	0	0	0
OTU0825	Exophiala	0.000842566	0	jrk06929	Ascomycota	Dothideomycetes	Asterinales	Asterinaceae	Prillieuxina		epiphyte	litter_saprotroph	parasymbiont	foliar_endophyte	leaf/fruit/seed_pathogen	leaf/fruit/seed		non-aquatic			filamentous_mycelium	thyrothecium_(tiny_flattened_disc,_aperture_in_the_middle)	closed					0	animal_parasite	litter_saprotroph	0	root_endophyte_dark_septate	root-associated	leaf/fruit/seed,animal_material	0	partly_aquatic	animal_parasite/opportunistic_human_parasite	0	dimorphic_yeast	0	0	0	0	0	0
OTU0826	Leucosporidium	0.000842566	0	jrk08966	Ascomycota	Dothideomycetes	Asterinales	Asterinaceae	Trichasterina		epiphyte	litter_saprotroph	foliar_endophyte	foliar_endophyte	leaf/fruit/seed_pathogen	leaf/fruit/seed		partly_marine_(partly_non-aquatic)			filamentous_mycelium	thyrothecium_(tiny_flattened_disc,_aperture_in_the_middle)	closed					0	soil_saprotroph	0	0	0	0	soil	0	partly_aquatic	0	0	yeast	none	none	0	0	0	0
OTU0827	Pisolithus	0	0.00164818	jrk09150	Ascomycota	Dothideomycetes	Asterinales	Asterinaceae	Uleothyrium		epiphyte	litter_saprotroph	foliar_endophyte	foliar_endophyte	leaf/fruit/seed_pathogen	leaf/fruit/seed		non-aquatic			filamentous_mycelium	thyrothecium_(tiny_flattened_disc,_aperture_in_the_middle)	closed					0	ectomycorrhizal	0	0	0	0	0	0	non-aquatic	0	0	filamentous_mycelium	gasteroid	closed	long-distance	/pisolithus-scleroderma	0	0
OTU0828	Kondoa	0.000842566	0	jrk09353	Ascomycota	Dothideomycetes	Asterinales	Asterinales family incertae sedis	Vishnumyces		epiphyte	litter_saprotroph	foliar_endophyte	foliar_endophyte		leaf/fruit/seed		non-aquatic			filamentous_mycelium	thyrothecium_(tiny_flattened_disc,_aperture_in_the_middle)	closed					0	unspecified_saprotroph	0	0	0	0	0	0	partly_aquatic	0	0	dimorphic_yeast	0	0	0	0	0	0
OTU0829	Sporobolomyces	0.000842566	0	jrk00733	Ascomycota	Dothideomycetes	Asterinales	Asterotexaceae	Asterotexis		plant_pathogen	litter_saprotroph	epiphyte	foliar_endophyte	leaf/fruit/seed_pathogen	leaf/fruit/seed		non-aquatic			filamentous_mycelium	thyrothecium_(tiny_flattened_disc,_aperture_in_the_middle)	closed					0	mycoparasite	0	litter_saprotroph_some_species	0	0	fungal_material	0	partly_aquatic	0	0	yeast	none	none	0	0	0	0
OTU0830	Rhizophagus	0	0.00164818	jrk03787	Ascomycota	Dothideomycetes	Asterinales	Hemigraphaceae	Hemigrapha		lichen_parasite	epiphyte	lichenicolous		leaf/fruit/seed_pathogen	leaf/fruit/seed		non-aquatic			filamentous_mycelium							0	arbuscular_mycorrhizal	root-associated	0	root_endophyte	0	0	0	0	0	0	filamentous_mycelium	none	none	0	0	0	0
OTU0831	Sporobolomyces	0.000842566	0	jrk04554	Ascomycota	Dothideomycetes	Asterinales	Lembosiaceae	Lembosia		epiphyte	litter_saprotroph		foliar_endophyte		leaf/fruit/seed		non-aquatic			filamentous_mycelium	thyrothecium_(tiny_flattened_disc,_aperture_in_the_middle)	closed					0	mycoparasite	0	litter_saprotroph_some_species	0	0	fungal_material	0	partly_aquatic	0	0	yeast	none	none	0	0	0	0
OTU0832	Sporobolomyces	0.000842566	0	jrk04934	Ascomycota	Dothideomycetes	Dothideomycetes order incertae sedis	Dothideomycetes family incertae sedis	Marquesius		litter_saprotroph							freshwater			filamentous_mycelium							0	mycoparasite	0	litter_saprotroph_some_species	0	0	fungal_material	0	partly_aquatic	0	0	yeast	none	none	0	0	0	0
OTU0833	Penicillium	0	0.00164818	jrk03720	Ascomycota	Dothideomycetes	Pleosporales	Phaeosphaeriaceae	Hawksworthiana	synonym of Dlhawksworthia	wood_saprotroph					leaf/fruit/seed		non-aquatic			filamentous_mycelium	perithecium_(hymenium_hidden,_narrow_opening)	closed					0	unspecified_saprotroph	foliar_endophyte	toxin-producing,animal_parasite_some_species,mycoparasite_some_species	foliar_endophyte	0	soil	mold	partly_aquatic	opportunistic_human_parasite	0	filamentous_mycelium	0	0	0	0	0	0
OTU0834	Penicillium	0	0.00164818	jrk00585	Ascomycota	Eurotiomycetes	Chaetothyriales	Herpotrichiellaceae	Argopericonia		epiphyte																	0	unspecified_saprotroph	foliar_endophyte	toxin-producing,animal_parasite_some_species,mycoparasite_some_species	foliar_endophyte	0	soil	mold	partly_aquatic	opportunistic_human_parasite	0	filamentous_mycelium	0	0	0	0	0	0
OTU0835	Wallemia	0	0.00164818	jrk00576	Ascomycota	Eurotiomycetes	Onygenales	Onygenales family incertae sedis	Arcuadendron		animal_parasite	animal_decomposer				animal_material			animal_parasite									0	unspecified_saprotroph	0	extremophile_xerophile_for_high_salt_or_sugar_content	0	0	sugar-rich_substrates	0	partly_aquatic	0	0	filamentous_mycelium	none	none	0	0	0	0
OTU0836	Sporobolomyces	0.000842566	0	jrk03376	Ascomycota	Geoglossomycetes	Geoglossales	Geoglossaceae	Geoglossum		soil_saprotroph	unspecified_symbiotroph	CHEGD_symbiotrophs	root-associated	root-associated	roots,soil		non-aquatic			filamentous_mycelium	clavarioid	smooth					0	mycoparasite	0	litter_saprotroph_some_species	0	0	fungal_material	0	partly_aquatic	0	0	yeast	none	none	0	0	0	0
OTU0837	Penicillium	0.000842566	0	jrk03484	Ascomycota	Geoglossomycetes	Geoglossales	Geoglossaceae	Glutinoglossum		soil_saprotroph	unspecified_symbiotroph	CHEGD_symbiotrophs	root-associated	root-associated	roots,soil		non-aquatic			filamentous_mycelium	clavarioid	smooth					0	unspecified_saprotroph	foliar_endophyte	toxin-producing,animal_parasite_some_species,mycoparasite_some_species	foliar_endophyte	0	soil	mold	partly_aquatic	opportunistic_human_parasite	0	filamentous_mycelium	0	0	0	0	0	0
OTU0838	Aspergillus	0	0.00164818	jrk03790	Ascomycota	Geoglossomycetes	Geoglossales	Geoglossaceae	Hemileucoglossum		soil_saprotroph					soil		non-aquatic			filamentous_mycelium	clavarioid	smooth					0	unspecified_saprotroph	foliar_endophyte	hypervariable,_saprotroph_animal_pathogen_endophyte	foliar_endophyte	0	leaf/fruit/seed,soil,dung,animal_material	mold	partly_aquatic	animal_parasite/opportunistic_human_parasite	0	filamentous_mycelium	0	0	0	0	0	0
OTU0839	Chaetothyriales genus Incertae sedis	0.000842566	0	jrk04656	Ascomycota	Geoglossomycetes	Geoglossales	Geoglossaceae	Leucoglossum		soil_saprotroph					soil		non-aquatic			filamentous_mycelium	clavarioid	smooth					#N/A	#N/A	#N/A	#N/A	#N/A	#N/A	#N/A	#N/A	#N/A	#N/A	#N/A	#N/A	#N/A	#N/A	#N/A	#N/A	#N/A	#N/A
OTU0840	Mytilinidion	0.000842566	0	jrk04840	Ascomycota	Geoglossomycetes	Geoglossales	Geoglossaceae	Maasoglossum		soil_saprotroph	unspecified_symbiotroph	CHEGD_symbiotrophs	root-associated	root-associated	roots,soil		non-aquatic			filamentous_mycelium	clavarioid	smooth					0	wood_saprotroph	0	0	0	0	wood	soft_rot	non-aquatic	0	0	filamentous_mycelium	hysterothecium_(opening_slith-like)	closed	0	0	0	0
OTU0841	Sporobolomyces	0.000842566	0	jrk07736	Ascomycota	Geoglossomycetes	Geoglossales	Geoglossaceae	Sabuloglossum		soil_saprotroph	unspecified_symbiotroph	CHEGD_symbiotrophs	root-associated	root-associated	roots,soil		non-aquatic			filamentous_mycelium	clavarioid	smooth					0	mycoparasite	0	litter_saprotroph_some_species	0	0	fungal_material	0	partly_aquatic	0	0	yeast	none	none	0	0	0	0
OTU0842	Sporobolomyces	0.000842566	0	jrk07793	Ascomycota	Geoglossomycetes	Geoglossales	Geoglossaceae	Sarcoleotia		soil_saprotroph					soil		non-aquatic			filamentous_mycelium	clavarioid	smooth					0	mycoparasite	0	litter_saprotroph_some_species	0	0	fungal_material	0	partly_aquatic	0	0	yeast	none	none	0	0	0	0
OTU0843	Chionosphaera	0.000842566	0	jrk08983	Ascomycota	Geoglossomycetes	Geoglossales	Geoglossaceae	Trichoglossum		soil_saprotroph	unspecified_symbiotroph	CHEGD_symbiotrophs	root-associated	root-associated	roots,soil		non-aquatic			filamentous_mycelium	clavarioid	smooth					0	litter_saprotroph	0	lichen_parasite_two_species	0	0	leaf/fruit/seed	0	0	animal_endosymbiont	0	dimorphic_yeast	other	smooth	0	0	0	0
OTU0844	Sporobolomyces	0.000842566	0	jrk05801	Ascomycota	Geoglossomycetes	Geoglossales	Geoglossomycetes family incertae sedis	Nothomitra		soil_saprotroph					soil		non-aquatic			filamentous_mycelium	clavarioid	smooth					0	mycoparasite	0	litter_saprotroph_some_species	0	0	fungal_material	0	partly_aquatic	0	0	yeast	none	none	0	0	0	0
OTU0845	Cylindrocarpon	0	0.00164818	jrk09928	Ascomycota	Pezizomycetes	Pezizales	Pezizaceae	Chromelosporium		soil_saprotroph					soil		non-aquatic			filamentous_mycelium	other	other					0	plant_pathogen	0	0	0	leaf/fruit/seed_pathogen	0	0	partly_aquatic	0	0	filamentous_mycelium	0	0	0	0	0	0
OTU0846	Penicillium	0.000842566	0	jrk01879	Ascomycota	Sordariomycetes	Hypocreales	Bionectriaceae	Bionectria		wood_saprotroph	plant_pathogen	mycoparasite_and_litter_saprotroph_some_species		leaf/fruit/seed_pathogen	wood,leaf/fruit/seed,fungal_material,animal_material		non-aquatic	nematophagous		filamentous_mycelium							0	unspecified_saprotroph	foliar_endophyte	toxin-producing,animal_parasite_some_species,mycoparasite_some_species	foliar_endophyte	0	soil	mold	partly_aquatic	opportunistic_human_parasite	0	filamentous_mycelium	0	0	0	0	0	0
OTU0847	Meruliopsis	0	0.00164818		Ascomycota	Sordariomycetes	Hypocreales	Nectriaceae	Gibberella		plant_pathogen	litter_saprotroph	hypervariable,_saprotroph,damping-off_pathogen	foliar_endophyte	leaf/fruit/seed_pathogen	leaf/fruit/seed,roots,soil,animal_material	soft_rot	partly_aquatic	opportunistic_human_parasite		filamentous_mycelium							0	wood_saprotroph	0	0	0	0	wood	white_rot	non-aquatic	0	0	filamentous_mycelium	corticioid	smooth	0	0	0	0
OTU0848	Sorocybe	0.000842566	0	jrk08123	Ascomycota	Sordariomycetes	Magnaporthales	Magnaporthaceae	Slopeiomyces		root_endophyte			root_endophyte				non-aquatic			filamentous_mycelium	perithecium_(hymenium_hidden,_narrow_opening)	closed					0	unspecified_saprotroph	resin_saprotroph	0	0	0	resins	0	non-aquatic	0	0	dimorphic_yeast	0	0	0	0	0	0
OTU0849	Chionosphaeraceae genus Incertae sedis	0.000842566	0	jrk05698	Ascomycota	Sordariomycetes	Magnaporthales	Pyriculariaceae	Neopyricularia		plant_pathogen				leaf/fruit/seed_pathogen			non-aquatic			filamentous_mycelium	perithecium_(hymenium_hidden,_narrow_opening)	closed					#N/A	#N/A	#N/A	#N/A	#N/A	#N/A	#N/A	#N/A	#N/A	#N/A	#N/A	#N/A	#N/A	#N/A	#N/A	#N/A	#N/A	#N/A
OTU0850	Penicillium	0.000842566	0	jrk08954	Ascomycota	Sordariomycetes	Microascales	Triadelphiaceae	Triadelphia		litter_saprotroph	plant_pathogen	hypervariable		other_plant_pathogen	leaf/fruit/seed,animal_material		partly_freshwater_(partly_non-aquatic)	opportunistic_human_parasite		filamentous_mycelium	none	none					0	unspecified_saprotroph	foliar_endophyte	toxin-producing,animal_parasite_some_species,mycoparasite_some_species	foliar_endophyte	0	soil	mold	partly_aquatic	opportunistic_human_parasite	0	filamentous_mycelium	0	0	0	0	0	0
OTU0851	Penicillium	0.000842566	0	jrk05214	Ascomycota	Sordariomycetes	Xylariales	Xylariales family incertae sedis	Mirandina		litter_saprotroph					leaf/fruit/seed		freshwater			filamentous_mycelium							0	unspecified_saprotroph	foliar_endophyte	toxin-producing,animal_parasite_some_species,mycoparasite_some_species	foliar_endophyte	0	soil	mold	partly_aquatic	opportunistic_human_parasite	0	filamentous_mycelium	0	0	0	0	0	0
OTU0852	Paratritirachium	0.000842566	0	jrk01846	Basidiomycota	Agaricomycetes	Agaricales	Clavariaceae	Clavicorona		litter_saprotroph					leaf/fruit/seed		non-aquatic			filamentous_mycelium	clavarioid	smooth					0	soil_saprotroph	0	extremophile_thermophile	no_endophytic_capacity	0	soil	0	non-aquatic	0	0	filamentous_mycelium	none	none	0	0	0	0
OTU0853	Penicillium	0.000842566	0	jrk01727	Basidiomycota	Agaricomycetes	Agaricales	Hygrophoraceae	Chromosera		soil_saprotroph	unspecified_symbiotroph	CHEGD_symbiotrophs	root-associated	root-associated	roots,soil		non-aquatic			filamentous_mycelium	agaricoid	gills					0	unspecified_saprotroph	foliar_endophyte	toxin-producing,animal_parasite_some_species,mycoparasite_some_species	foliar_endophyte	0	soil	mold	partly_aquatic	opportunistic_human_parasite	0	filamentous_mycelium	0	0	0	0	0	0
OTU0854	Penicillium	0.000842566	0	jrk02253	Basidiomycota	Agaricomycetes	Agaricales	Hygrophoraceae	Cuphophyllus		soil_saprotroph	unspecified_symbiotroph	CHEGD_symbiotrophs	root-associated	root-associated	roots,soil		non-aquatic			filamentous_mycelium	agaricoid	gills					0	unspecified_saprotroph	foliar_endophyte	toxin-producing,animal_parasite_some_species,mycoparasite_some_species	foliar_endophyte	0	soil	mold	partly_aquatic	opportunistic_human_parasite	0	filamentous_mycelium	0	0	0	0	0	0
OTU0855	Sorocybe	0.000842566	0	jrk03425	Basidiomycota	Agaricomycetes	Agaricales	Hygrophoraceae	Gliophorus		soil_saprotroph	unspecified_symbiotroph	CHEGD_symbiotrophs	root-associated	root-associated	roots,soil		non-aquatic			filamentous_mycelium	agaricoid	gills					0	unspecified_saprotroph	resin_saprotroph	0	0	0	resins	0	non-aquatic	0	0	dimorphic_yeast	0	0	0	0	0	0
OTU0856	Sorocybe	0.000842566	0	jrk03466	Basidiomycota	Agaricomycetes	Agaricales	Hygrophoraceae	Gloioxanthomyces		soil_saprotroph	unspecified_symbiotroph	CHEGD_symbiotrophs	root-associated	root-associated	roots,soil		non-aquatic			filamentous_mycelium	agaricoid	gills					0	unspecified_saprotroph	resin_saprotroph	0	0	0	resins	0	non-aquatic	0	0	dimorphic_yeast	0	0	0	0	0	0
OTU0857	Sorocybe	0.000842566	0	jrk03936	Basidiomycota	Agaricomycetes	Agaricales	Hygrophoraceae	Humidicutis		soil_saprotroph	unspecified_symbiotroph	CHEGD_symbiotrophs	root-associated	root-associated	roots,soil		non-aquatic			filamentous_mycelium	agaricoid	gills					0	unspecified_saprotroph	resin_saprotroph	0	0	0	resins	0	non-aquatic	0	0	dimorphic_yeast	0	0	0	0	0	0
OTU0858	Claroideoglomus	0	0.00164818	jrk03998	Basidiomycota	Agaricomycetes	Agaricales	Hygrophoraceae	Hygroaster		soil_saprotroph	unspecified_symbiotroph	CHEGD_symbiotrophs	root-associated	root-associated	roots,soil		non-aquatic			filamentous_mycelium	agaricoid	gills					0	arbuscular_mycorrhizal	root-associated	0	root_endophyte	0	0	0	0	0	0	filamentous_mycelium	none	none	0	0	0	0
OTU0859	Sorocybe	0.000842566	0	jrk03999	Basidiomycota	Agaricomycetes	Agaricales	Hygrophoraceae	Hygrocybe		soil_saprotroph	unspecified_symbiotroph	CHEGD_symbiotrophs	root-associated	root-associated	roots,soil		non-aquatic			filamentous_mycelium	agaricoid	gills					0	unspecified_saprotroph	resin_saprotroph	0	0	0	resins	0	non-aquatic	0	0	dimorphic_yeast	0	0	0	0	0	0
OTU0860	Exophiala	0.000842566	0	jrk05636	Basidiomycota	Agaricomycetes	Agaricales	Hygrophoraceae	Neohygrocybe		soil_saprotroph	unspecified_symbiotroph	CHEGD_symbiotrophs	root-associated	root-associated	roots,soil		non-aquatic			filamentous_mycelium	agaricoid	gills					0	animal_parasite	litter_saprotroph	0	root_endophyte_dark_septate	root-associated	leaf/fruit/seed,animal_material	0	partly_aquatic	animal_parasite/opportunistic_human_parasite	0	dimorphic_yeast	0	0	0	0	0	0
OTU0861	Sorocybe	0.000842566	0	jrk06909	Basidiomycota	Agaricomycetes	Agaricales	Hygrophoraceae	Porpolomopsis		soil_saprotroph	unspecified_symbiotroph	CHEGD_symbiotrophs	root-associated	root-associated	roots,soil		non-aquatic			filamentous_mycelium	agaricoid	gills					0	unspecified_saprotroph	resin_saprotroph	0	0	0	resins	0	non-aquatic	0	0	dimorphic_yeast	0	0	0	0	0	0
OTU0862	Phaeomoniella	0.000842566	0	jrk02496	Basidiomycota	Agaricomycetes	Agaricales	Tricholomataceae	Dermoloma		soil_saprotroph	unspecified_symbiotroph	CHEGD_symbiotrophs	root-associated	root-associated	roots,soil		non-aquatic			filamentous_mycelium	agaricoid	gills					0	plant_pathogen	0	0	0	leaf/fruit/seed_pathogen	0	0	non-aquatic	0	0	dimorphic_yeast	0	0	0	0	0	0
OTU0863	Tomentella	0	0.00164818	jrk07018	Basidiomycota	Agaricomycetes	Agaricales	Tricholomataceae	Pseudobaeospora		soil_saprotroph	unspecified_symbiotroph	CHEGD_symbiotrophs	root-associated	root-associated	roots,soil		non-aquatic			filamentous_mycelium	agaricoid	gills					0	ectomycorrhizal	0	0	0	0	0	0	non-aquatic	0	0	filamentous_mycelium	corticioid	smooth	medium-distance_smooth	/tomentella-thelephora	0	0
OTU0864	Exophiala	0.000842566	0	jrk01092	Basidiomycota	Agaricomycetes	Boletales	Boletinellaceae	Boletinellus		arthropod-associated	root-associated		root-associated	root-associated			non-aquatic	arthropod-associated		filamentous_mycelium	agaricoid	poroid					0	animal_parasite	litter_saprotroph	0	root_endophyte_dark_septate	root-associated	leaf/fruit/seed,animal_material	0	partly_aquatic	animal_parasite/opportunistic_human_parasite	0	dimorphic_yeast	0	0	0	0	0	0
OTU0865	Tomentella	0	0.00164818	jrk09603	Basidiomycota	Agaricomycetes	Boletales	Boletinellaceae	Phaeogyroporus		arthropod-associated	root-associated		root-associated	root-associated			non-aquatic	arthropod-associated		filamentous_mycelium	agaricoid	poroid					0	ectomycorrhizal	0	0	0	0	0	0	non-aquatic	0	0	filamentous_mycelium	corticioid	smooth	medium-distance_smooth	/tomentella-thelephora	0	0
OTU0866	Sorocybe	0.000842566	0	jrk06502	Basidiomycota	Agaricomycetes	Boletales	Boletinellaceae	Phlebopus		arthropod-associated	root-associated		root-associated	root-associated			non-aquatic	arthropod-associated		filamentous_mycelium	agaricoid	poroid					0	unspecified_saprotroph	resin_saprotroph	0	0	0	resins	0	non-aquatic	0	0	dimorphic_yeast	0	0	0	0	0	0
OTU0867	Exophiala	0.000842566	0	jrk01106	Basidiomycota	Agaricomycetes	Geastrales	Sclerogastraceae	Boninogaster		litter_saprotroph					leaf/fruit/seed		non-aquatic			filamentous_mycelium	gasteroid-hypogeous	closed					0	animal_parasite	litter_saprotroph	0	root_endophyte_dark_septate	root-associated	leaf/fruit/seed,animal_material	0	partly_aquatic	animal_parasite/opportunistic_human_parasite	0	dimorphic_yeast	0	0	0	0	0	0
OTU0868	Exophiala	0.000842566	0	jrk07884	Basidiomycota	Agaricomycetes	Geastrales	Sclerogastraceae	Sclerogaster		litter_saprotroph					leaf/fruit/seed		non-aquatic			filamentous_mycelium	gasteroid-hypogeous	closed					0	animal_parasite	litter_saprotroph	0	root_endophyte_dark_septate	root-associated	leaf/fruit/seed,animal_material	0	partly_aquatic	animal_parasite/opportunistic_human_parasite	0	dimorphic_yeast	0	0	0	0	0	0
OTU0869	Exophiala	0.000842566	0	jrk06376	Basidiomycota	Agaricomycetes	Gomphales	Gomphaceae	Phaeoclavulina		litter_saprotroph							non-aquatic			filamentous_mycelium	clavarioid	smooth					0	animal_parasite	litter_saprotroph	0	root_endophyte_dark_septate	root-associated	leaf/fruit/seed,animal_material	0	partly_aquatic	animal_parasite/opportunistic_human_parasite	0	dimorphic_yeast	0	0	0	0	0	0
OTU0870	Penicillium	0.000842566	0	jrk06498	Basidiomycota	Agaricomycetes	Polyporales	Meruliaceae	Phlebiporia		wood_saprotroph					wood	white_rot	non-aquatic			filamentous_mycelium	corticioid	poroid					0	unspecified_saprotroph	foliar_endophyte	toxin-producing,animal_parasite_some_species,mycoparasite_some_species	foliar_endophyte	0	soil	mold	partly_aquatic	opportunistic_human_parasite	0	filamentous_mycelium	0	0	0	0	0	0
OTU0871	Exophiala	0.000842566	0	jrk01538	Basidiomycota	Agaricomycetes	Polyporales	Polyporaceae	Cerarioporia		wood_saprotroph					wood		non-aquatic			filamentous_mycelium	polyporoid	poroid					0	animal_parasite	litter_saprotroph	0	root_endophyte_dark_septate	root-associated	leaf/fruit/seed,animal_material	0	partly_aquatic	animal_parasite/opportunistic_human_parasite	0	dimorphic_yeast	0	0	0	0	0	0
OTU0872	Exophiala	0.000842566	0	jrk09143	Basidiomycota	Microbotryomycetes	Microbotryomycetes order incertae sedis	Microbotryomycetes family incertae sedis	Udeniozyma		unspecified							freshwater			yeast	none	none					0	animal_parasite	litter_saprotroph	0	root_endophyte_dark_septate	root-associated	leaf/fruit/seed,animal_material	0	partly_aquatic	animal_parasite/opportunistic_human_parasite	0	dimorphic_yeast	0	0	0	0	0	0
OTU0873	Exophiala	0.000842566	0	jrk00482	Basidiomycota	Pucciniomycetes	Septobasidiales	Septobasidiaceae	Aphelariopsis		epiphyte							non-aquatic			filamentous_mycelium	clavarioid	smooth					0	animal_parasite	litter_saprotroph	0	root_endophyte_dark_septate	root-associated	leaf/fruit/seed,animal_material	0	partly_aquatic	animal_parasite/opportunistic_human_parasite	0	dimorphic_yeast	0	0	0	0	0	0
OTU0874	Sorocybe	0.000842566	0	jrk05895	Olpidiomycota	Olpidiomycetes	Olpidiales	Olpidiaceae	Olpidium		algal_parasite	plant_pathogen	hypervariable		leaf/fruit/seed_pathogen,algal_parasite	leaf/fruit/seed,roots,algal_material,animal_material		partly_aquatic			zoosporic-plasmodium_(aphelid)	zoosporangium	closed					0	unspecified_saprotroph	resin_saprotroph	0	0	0	resins	0	non-aquatic	0	0	dimorphic_yeast	0	0	0	0	0	0
OTU0875	Arachnomyces	0	0.00164818	jrk00483	Aphelidiomycota	Aphelidiomycetes	Aphelidiales	Aphelidiaceae	Aphelidium		algal_parasite			no_endophytic_capacity	algal_parasite	algal_material		partly_aquatic		algae	zoosporic-plasmodium_(aphelid)	none	none					0	animal_parasite	dung_saprotroph	0	0	0	animal_material,dung	keratinolytic	non-aquatic	animal_parasite/opportunistic_human_parasite	0	filamentous_mycelium	cleistothecium_(closed,_spherical)	closed	0	0	0	0
OTU0876	Exophiala	0.000842566	0	jrk06147	Aphelidiomycota	Aphelidiomycetes	Aphelidiales	Aphelidiaceae	Paraphelidium		algal_parasite			no_endophytic_capacity	algal_parasite	algal_material		partly_aquatic		algae	zoosporic-plasmodium_(aphelid)	none	none					0	animal_parasite	litter_saprotroph	0	root_endophyte_dark_septate	root-associated	leaf/fruit/seed,animal_material	0	partly_aquatic	animal_parasite/opportunistic_human_parasite	0	dimorphic_yeast	0	0	0	0	0	0
OTU0877	Trechispora	0	0.00164818	jrk06992	Aphelidiomycota	Aphelidiomycetes	Aphelidiales	Aphelidiaceae	Pseudaphelidium		algal_parasite			no_endophytic_capacity	algal_parasite	algal_material		marine		algae	zoosporic-plasmodium_(aphelid)	none	none					0	wood_saprotroph	0	0	0	0	wood	white_rot	non-aquatic	0	0	filamentous_mycelium	corticioid	poroid	0	0	0	0
OTU0878	Fungi genus Incertae sedis	0.000842566	0	jrk00300	Aphelidiomycota	Aphelidiomycetes	Aphelidiales	Aphelidiales family incertae sedis	Amoeboaphelidium		algal_parasite			no_endophytic_capacity	algal_parasite	algal_material		partly_aquatic		algae	zoosporic-plasmodium_(aphelid)	none	none					#N/A	#N/A	#N/A	#N/A	#N/A	#N/A	#N/A	#N/A	#N/A	#N/A	#N/A	#N/A	#N/A	#N/A	#N/A	#N/A	#N/A	#N/A
OTU0879	Fungi genus Incertae sedis	0.000842566	0	jrk10131	Basidiomycota	Agaricomycetes	Agaricales	Psathyrellaceae	Ozonium		soil_saprotroph					soil		partly_aquatic			filamentous_mycelium	agaricoid	gills					#N/A	#N/A	#N/A	#N/A	#N/A	#N/A	#N/A	#N/A	#N/A	#N/A	#N/A	#N/A	#N/A	#N/A	#N/A	#N/A	#N/A	#N/A
OTU0880	Inocybe	0	0.00164818	jrk00567	Ascomycota	Archaeorhizomycetes	Archaeorhizomycetales	Archaeorhizomycetaceae	Archaeorhizomyces		soil_saprotroph	root-associated		root-associated	root-associated	roots,soil		non-aquatic			filamentous_mycelium	none	none					0	ectomycorrhizal	0	0	0	0	0	0	non-aquatic	0	0	filamentous_mycelium	agaricoid	gills	short-distance_delicate	/inocybe	0	0
OTU0881	Sorocybe	0.000842566	0	jrk00383	Ascomycota	Arthoniomycetes	Arthoniales	Andreiomycetaceae	Andreiomyces		lichenized							non-aquatic			thallus_photosynthetic	none	none			chlorococcoid		0	unspecified_saprotroph	resin_saprotroph	0	0	0	resins	0	non-aquatic	0	0	dimorphic_yeast	0	0	0	0	0	0
OTU0882	Fungi genus Incertae sedis	0.000842566	0	jrk00267	Ascomycota	Arthoniomycetes	Arthoniales	Arthoniaceae	Amazonomyces		lichenized							non-aquatic			thallus_photosynthetic	apothecium_(hymenium_on_surface)	smooth			trentepohlioid		#N/A	#N/A	#N/A	#N/A	#N/A	#N/A	#N/A	#N/A	#N/A	#N/A	#N/A	#N/A	#N/A	#N/A	#N/A	#N/A	#N/A	#N/A
OTU0883	Fungi genus Incertae sedis	0.000842566	0	jrk00603	Ascomycota	Arthoniomycetes	Arthoniales	Arthoniaceae	Arthonia		lichenized		lichen_parasite_some_species					non-aquatic			thallus_photosynthetic	apothecium_(hymenium_on_surface)	smooth			trentepohlioid		#N/A	#N/A	#N/A	#N/A	#N/A	#N/A	#N/A	#N/A	#N/A	#N/A	#N/A	#N/A	#N/A	#N/A	#N/A	#N/A	#N/A	#N/A
OTU0884	Fungi genus Incertae sedis	0.000842566	0	jrk00607	Ascomycota	Arthoniomycetes	Arthoniales	Arthoniaceae	Arthothelium		lichenized		saprotroph_unspecified_some_species					non-aquatic			thallus_photosynthetic	apothecium_(hymenium_on_surface)	smooth			trentepohlioid		#N/A	#N/A	#N/A	#N/A	#N/A	#N/A	#N/A	#N/A	#N/A	#N/A	#N/A	#N/A	#N/A	#N/A	#N/A	#N/A	#N/A	#N/A
OTU0885	Devriesia	0	0.00164818	jrk01178	Ascomycota	Arthoniomycetes	Arthoniales	Arthoniaceae	Briancoppinsia		lichen_parasite	fungal_decomposer				fungal_material,algal_material		non-aquatic			filamentous_mycelium	none	none					0	plant_pathogen	litter_saprotroph	0	0	leaf/fruit/seed_pathogen	leaf/fruit/seed	0	non-aquatic	0	0	filamentous_mycelium	perithecium_(hymenium_hidden,_narrow_opening)	closed	0	0	0	0
OTU0886	Symbiotaphrina	0.000842566	0	jrk01998	Ascomycota	Arthoniomycetes	Arthoniales	Arthoniaceae	Coniangium		lichenized							non-aquatic			thallus_photosynthetic							0	animal_endosymbiont	litter_saprotroph	0	0	0	leaf/fruit/seed	0	non-aquatic	animal_endosymbiont	0	yeast	0	0	0	0	0	0
OTU0887	Ascomycota genus Incertae sedis	0.000842566	0	jrk01999	Ascomycota	Arthoniomycetes	Arthoniales	Arthoniaceae	Coniarthonia		lichenized							non-aquatic			thallus_photosynthetic	apothecium_(hymenium_on_surface)	smooth			trentepohlioid		#N/A	#N/A	#N/A	#N/A	#N/A	#N/A	#N/A	#N/A	#N/A	#N/A	#N/A	#N/A	#N/A	#N/A	#N/A	#N/A	#N/A	#N/A
OTU0888	Fungi genus Incertae sedis	0.000842566	0	jrk02008	Ascomycota	Arthoniomycetes	Arthoniales	Arthoniaceae	Coniocarpon		lichenized							non-aquatic			thallus_photosynthetic	apothecium_(hymenium_on_surface)	smooth			trentepohlioid		#N/A	#N/A	#N/A	#N/A	#N/A	#N/A	#N/A	#N/A	#N/A	#N/A	#N/A	#N/A	#N/A	#N/A	#N/A	#N/A	#N/A	#N/A
OTU0889	Fungi genus Incertae sedis	0.000842566	0	jrk02186	Ascomycota	Arthoniomycetes	Arthoniales	Arthoniaceae	Crypthonia		lichenized							non-aquatic			thallus_photosynthetic	apothecium_(hymenium_on_surface)	smooth			trentepohlioid		#N/A	#N/A	#N/A	#N/A	#N/A	#N/A	#N/A	#N/A	#N/A	#N/A	#N/A	#N/A	#N/A	#N/A	#N/A	#N/A	#N/A	#N/A
OTU0890	Fungi genus Incertae sedis	0.000842566	0	jrk02213	Ascomycota	Arthoniomycetes	Arthoniales	Arthoniaceae	Cryptophaea		lichenized							non-aquatic			thallus_photosynthetic	apothecium_(hymenium_on_surface)	smooth			trentepohlioid		#N/A	#N/A	#N/A	#N/A	#N/A	#N/A	#N/A	#N/A	#N/A	#N/A	#N/A	#N/A	#N/A	#N/A	#N/A	#N/A	#N/A	#N/A
OTU0891	Fungi genus Incertae sedis	0.000842566	0	jrk02223	Ascomycota	Arthoniomycetes	Arthoniales	Arthoniaceae	Cryptothecia		lichenized							non-aquatic			thallus_photosynthetic	other				trentepohlioid		#N/A	#N/A	#N/A	#N/A	#N/A	#N/A	#N/A	#N/A	#N/A	#N/A	#N/A	#N/A	#N/A	#N/A	#N/A	#N/A	#N/A	#N/A
OTU0892	Penicillium	0.000842566	0	jrk03014	Ascomycota	Arthoniomycetes	Arthoniales	Arthoniaceae	Eremothecella		lichenized							non-aquatic			thallus_photosynthetic	apothecium_(hymenium_on_surface)	smooth			trentepohlioid		0	unspecified_saprotroph	foliar_endophyte	toxin-producing,animal_parasite_some_species,mycoparasite_some_species	foliar_endophyte	0	soil	mold	partly_aquatic	opportunistic_human_parasite	0	filamentous_mycelium	0	0	0	0	0	0
OTU0893	Lecanicillium	0	0.00164818	jrk03472	Ascomycota	Arthoniomycetes	Arthoniales	Arthoniaceae	Glomerulophoron		lichenized							non-aquatic			thallus_photosynthetic	none	none			trentepohlioid		0	animal_parasite	animal_decomposer	0	foliar_endophyte	0	animal_material	0	partly_aquatic	invertebrate_parasite	0	filamentous_mycelium	0	0	0	0	0	0
OTU0894	Gamszarea	0	0.00164818	jrk03823	Ascomycota	Arthoniomycetes	Arthoniales	Arthoniaceae	Herpothallon		lichenized							non-aquatic			thallus_photosynthetic	none	none			trentepohlioid		#N/A	#N/A	#N/A	#N/A	#N/A	#N/A	#N/A	#N/A	#N/A	#N/A	#N/A	#N/A	#N/A	#N/A	#N/A	#N/A	#N/A	#N/A
OTU0895	Penicillium	0	0.00164818	jrk04147	Ascomycota	Arthoniomycetes	Arthoniales	Arthoniaceae	Inoderma		lichenized							non-aquatic			thallus_photosynthetic	apothecium_(hymenium_on_surface)	smooth			trentepohlioid		0	unspecified_saprotroph	foliar_endophyte	toxin-producing,animal_parasite_some_species,mycoparasite_some_species	foliar_endophyte	0	soil	mold	partly_aquatic	opportunistic_human_parasite	0	filamentous_mycelium	0	0	0	0	0	0
OTU0896	Chaetothyriales genus Incertae sedis	0.000842566	0	jrk04589	Ascomycota	Arthoniomycetes	Arthoniales	Arthoniaceae	Leprantha		lichenized							non-aquatic			thallus_photosynthetic							#N/A	#N/A	#N/A	#N/A	#N/A	#N/A	#N/A	#N/A	#N/A	#N/A	#N/A	#N/A	#N/A	#N/A	#N/A	#N/A	#N/A	#N/A
OTU0897	Penicillium	0.000842566	0	jrk05459	Ascomycota	Arthoniomycetes	Arthoniales	Arthoniaceae	Myriostigma		lichenized							non-aquatic			thallus_photosynthetic	other				trentepohlioid		0	unspecified_saprotroph	foliar_endophyte	toxin-producing,animal_parasite_some_species,mycoparasite_some_species	foliar_endophyte	0	soil	mold	partly_aquatic	opportunistic_human_parasite	0	filamentous_mycelium	0	0	0	0	0	0
OTU0898	Penicillium	0.000842566	0	jrk06003	Ascomycota	Arthoniomycetes	Arthoniales	Arthoniaceae	Pachnolepia		lichenized							non-aquatic			thallus_photosynthetic	apothecium_(hymenium_on_surface)	smooth			trentepohlioid		0	unspecified_saprotroph	foliar_endophyte	toxin-producing,animal_parasite_some_species,mycoparasite_some_species	foliar_endophyte	0	soil	mold	partly_aquatic	opportunistic_human_parasite	0	filamentous_mycelium	0	0	0	0	0	0
OTU0899	Gallinipes	0	0.00164818	jrk07479	Ascomycota	Arthoniomycetes	Arthoniales	Arthoniaceae	Reichlingia		lichenized							non-aquatic			thallus_photosynthetic	apothecium_(hymenium_on_surface)	smooth					0	pollen_saprotroph	0	0	0	0	pollen	0	partly_freshwater_(partly_non-aquatic)	0	0	zoosporic-rhizomycelial_(chytrid-like)	zoosporangium	closed	0	0	0	0
OTU0900	Phaeomoniella	0.000842566	0	jrk08131	Ascomycota	Arthoniomycetes	Arthoniales	Arthoniaceae	Snippocia		lichenized							non-aquatic			thallus_photosynthetic	none	none			trentepohlioid		0	plant_pathogen	0	0	0	leaf/fruit/seed_pathogen	0	0	non-aquatic	0	0	dimorphic_yeast	0	0	0	0	0	0
OTU0901	Penicillium	0.000842566	0	jrk08280	Ascomycota	Arthoniomycetes	Arthoniales	Arthoniaceae	Sporodophoron		lichenized							non-aquatic			thallus_photosynthetic	apothecium_(hymenium_on_surface)	smooth			trentepohlioid		0	unspecified_saprotroph	foliar_endophyte	toxin-producing,animal_parasite_some_species,mycoparasite_some_species	foliar_endophyte	0	soil	mold	partly_aquatic	opportunistic_human_parasite	0	filamentous_mycelium	0	0	0	0	0	0
OTU0902	Penicillium	0.000842566	0	jrk08432	Ascomycota	Arthoniomycetes	Arthoniales	Arthoniaceae	Stirtonia		lichenized							non-aquatic			thallus_photosynthetic	other				trentepohlioid		0	unspecified_saprotroph	foliar_endophyte	toxin-producing,animal_parasite_some_species,mycoparasite_some_species	foliar_endophyte	0	soil	mold	partly_aquatic	opportunistic_human_parasite	0	filamentous_mycelium	0	0	0	0	0	0
OTU0903	Penicillium	0.000842566	0	jrk09127	Ascomycota	Arthoniomycetes	Arthoniales	Arthoniaceae	Tylophoron		lichenized							non-aquatic			thallus_photosynthetic	mazaedium_(pushpin-like)	other			trentepohlioid		0	unspecified_saprotroph	foliar_endophyte	toxin-producing,animal_parasite_some_species,mycoparasite_some_species	foliar_endophyte	0	soil	mold	partly_aquatic	opportunistic_human_parasite	0	filamentous_mycelium	0	0	0	0	0	0
OTU0904	Penicillium	0.000842566	0	jrk01747	Ascomycota	Arthoniomycetes	Arthoniales	Chrysotrichaceae	Chrysothrix		lichenized							non-aquatic			thallus_photosynthetic	apothecium_(hymenium_on_surface)	smooth			chlorococcoid		0	unspecified_saprotroph	foliar_endophyte	toxin-producing,animal_parasite_some_species,mycoparasite_some_species	foliar_endophyte	0	soil	mold	partly_aquatic	opportunistic_human_parasite	0	filamentous_mycelium	0	0	0	0	0	0
OTU0905	Spizellomyces	0	0.00164818	jrk05048	Ascomycota	Arthoniomycetes	Arthoniales	Chrysotrichaceae	Melarthonis		lichenized							non-aquatic			thallus_photosynthetic	apothecium_(hymenium_on_surface)	smooth			chlorococcoid		0	pollen_saprotroph	0	0	0	0	pollen	0	partly_freshwater_(partly_non-aquatic)	0	0	zoosporic-rhizomycelial_(chytrid-like)	zoosporangium	closed	0	0	0	0
OTU0906	Penicillium	0	0.00164818	jrk00261	Ascomycota	Arthoniomycetes	Arthoniales	Lecanographaceae	Alyxoria		lichenized							non-aquatic			thallus_photosynthetic	apothecium_(hymenium_on_surface)	smooth			trentepohlioid		0	unspecified_saprotroph	foliar_endophyte	toxin-producing,animal_parasite_some_species,mycoparasite_some_species	foliar_endophyte	0	soil	mold	partly_aquatic	opportunistic_human_parasite	0	filamentous_mycelium	0	0	0	0	0	0
OTU0907	Spizellomycetaceae genus Incertae sedis	0.000842566	0	jrk03839	Ascomycota	Arthoniomycetes	Arthoniales	Lecanographaceae	Heterocyphelium		lichenized							non-aquatic			thallus_photosynthetic	mazaedium_(pushpin-like)	other			trentepohlioid		#N/A	#N/A	#N/A	#N/A	#N/A	#N/A	#N/A	#N/A	#N/A	#N/A	#N/A	#N/A	#N/A	#N/A	#N/A	#N/A	#N/A	#N/A
OTU0908	Penicillium	0.000842566	0	jrk04522	Ascomycota	Arthoniomycetes	Arthoniales	Lecanographaceae	Lecanographa		lichenized							non-aquatic			thallus_photosynthetic	apothecium_(hymenium_on_surface)	smooth			trentepohlioid	chlorococcoid	0	unspecified_saprotroph	foliar_endophyte	toxin-producing,animal_parasite_some_species,mycoparasite_some_species	foliar_endophyte	0	soil	mold	partly_aquatic	opportunistic_human_parasite	0	filamentous_mycelium	0	0	0	0	0	0
OTU0909	Exobasidium	0.000842566	0	jrk05197	Ascomycota	Arthoniomycetes	Arthoniales	Lecanographaceae	Milospium		lichen_parasite	fungal_decomposer				fungal_material,algal_material		non-aquatic			filamentous_mycelium	none	none					0	plant_pathogen	0	0	no_endophytic_capacity	leaf/fruit/seed_pathogen	0	0	non-aquatic	0	0	filamentous_mycelium	none	none	0	0	0	0
OTU0910	Penicillium	0.000842566	0	jrk05230	Ascomycota	Arthoniomycetes	Arthoniales	Lecanographaceae	Mixtoconidium		lichen_parasite	fungal_decomposer				fungal_material,algal_material		non-aquatic			filamentous_mycelium	apothecium_(hymenium_on_surface)	smooth					0	unspecified_saprotroph	foliar_endophyte	toxin-producing,animal_parasite_some_species,mycoparasite_some_species	foliar_endophyte	0	soil	mold	partly_aquatic	opportunistic_human_parasite	0	filamentous_mycelium	0	0	0	0	0	0
OTU0911	Penicillium	0.000842566	0	jrk06359	Ascomycota	Arthoniomycetes	Arthoniales	Lecanographaceae	Phacographa		lichen_parasite	fungal_decomposer				fungal_material,algal_material		non-aquatic			filamentous_mycelium	apothecium_(hymenium_on_surface)	smooth					0	unspecified_saprotroph	foliar_endophyte	toxin-producing,animal_parasite_some_species,mycoparasite_some_species	foliar_endophyte	0	soil	mold	partly_aquatic	opportunistic_human_parasite	0	filamentous_mycelium	0	0	0	0	0	0
OTU0912	Coniochaetaceae genus Incertae sedis	0	0.00164818	jrk06705	Ascomycota	Arthoniomycetes	Arthoniales	Lecanographaceae	Plectocarpon		lichen_parasite	fungal_decomposer				fungal_material,algal_material		non-aquatic			filamentous_mycelium	apothecium_(hymenium_on_surface)	smooth					#N/A	#N/A	#N/A	#N/A	#N/A	#N/A	#N/A	#N/A	#N/A	#N/A	#N/A	#N/A	#N/A	#N/A	#N/A	#N/A	#N/A	#N/A
OTU0913	Symbiotaphrina	0.000842566	0	jrk08615	Ascomycota	Arthoniomycetes	Arthoniales	Lecanographaceae	Zwackhia		lichenized							non-aquatic			thallus_photosynthetic	apothecium_(hymenium_on_surface)	smooth			trentepohlioid		0	animal_endosymbiont	litter_saprotroph	0	0	0	leaf/fruit/seed	0	non-aquatic	animal_endosymbiont	0	yeast	0	0	0	0	0	0
OTU0914	Symbiotaphrina	0.000842566	0	jrk09645	Ascomycota	Arthoniomycetes	Arthoniales	Opegraphaceae	Camanchaca		lichenized							non-aquatic			thallus_photosynthetic							0	animal_endosymbiont	litter_saprotroph	0	0	0	leaf/fruit/seed	0	non-aquatic	animal_endosymbiont	0	yeast	0	0	0	0	0	0
OTU0915	Lindtneria	0	0.00164818	jrk01982	Ascomycota	Arthoniomycetes	Arthoniales	Opegraphaceae	Combea		lichenized							non-aquatic			thallus_photosynthetic	apothecium_(hymenium_on_surface)	smooth					0	wood_saprotroph	0	0	0	0	wood	white_rot	non-aquatic	0	0	filamentous_mycelium	corticioid	smooth	0	0	0	0
OTU0916	Penicillium	0.000842566	0	jrk02581	Ascomycota	Arthoniomycetes	Arthoniales	Opegraphaceae	Dictyographa		lichenized							non-aquatic			thallus_photosynthetic							0	unspecified_saprotroph	foliar_endophyte	toxin-producing,animal_parasite_some_species,mycoparasite_some_species	foliar_endophyte	0	soil	mold	partly_aquatic	opportunistic_human_parasite	0	filamentous_mycelium	0	0	0	0	0	0
OTU0917	Symbiotaphrina	0.000842566	0	jrk02748	Ascomycota	Arthoniomycetes	Arthoniales	Opegraphaceae	Dolichocarpus		lichenized							non-aquatic			thallus_photosynthetic	apothecium_(hymenium_on_surface)	smooth					0	animal_endosymbiont	litter_saprotroph	0	0	0	leaf/fruit/seed	0	non-aquatic	animal_endosymbiont	0	yeast	0	0	0	0	0	0
OTU0918	Hypocreales genus Incertae sedis	0	0.00164818	jrk03243	Ascomycota	Arthoniomycetes	Arthoniales	Opegraphaceae	Fouragea		lichenized							non-aquatic			thallus_photosynthetic	apothecium_(hymenium_on_surface)	smooth			trentepohlioid		#N/A	#N/A	#N/A	#N/A	#N/A	#N/A	#N/A	#N/A	#N/A	#N/A	#N/A	#N/A	#N/A	#N/A	#N/A	#N/A	#N/A	#N/A
OTU0919	Aspergillaceae genus Incertae sedis	0	0.00164818	jrk09646	Ascomycota	Arthoniomycetes	Arthoniales	Opegraphaceae	Hubbsia		lichenized							non-aquatic			thallus_photosynthetic	apothecium_(hymenium_on_surface)	smooth			trentepohlioid		#N/A	#N/A	#N/A	#N/A	#N/A	#N/A	#N/A	#N/A	#N/A	#N/A	#N/A	#N/A	#N/A	#N/A	#N/A	#N/A	#N/A	#N/A
OTU0920	Neognomoniopsis	0	0.00164818	jrk04138	Ascomycota	Arthoniomycetes	Arthoniales	Opegraphaceae	Ingaderia		lichenized							non-aquatic			thallus_photosynthetic	apothecium_(hymenium_on_surface)	smooth					#N/A	#N/A	#N/A	#N/A	#N/A	#N/A	#N/A	#N/A	#N/A	#N/A	#N/A	#N/A	#N/A	#N/A	#N/A	#N/A	#N/A	#N/A
OTU0921	Stemphylium	0.000842566	0	jrk04752	Ascomycota	Arthoniomycetes	Arthoniales	Opegraphaceae	Llimonaea		lichenized							non-aquatic			thallus_photosynthetic	apothecium_(hymenium_on_surface)	smooth			trentepohlioid		0	plant_pathogen	litter_saprotroph	0	0	leaf/fruit/seed_pathogen	leaf/fruit/seed	soft_rot	partly_aquatic	0	0	filamentous_mycelium	0	0	0	0	0	0
OTU0922	Alternaria	0.000842566	0	jrk05829	Ascomycota	Arthoniomycetes	Arthoniales	Opegraphaceae	Nyungwea		lichenized							non-aquatic			thallus_photosynthetic	none	none			trentepohlioid		0	plant_pathogen	litter_saprotroph	0	foliar_endophyte	leaf/fruit/seed_pathogen	leaf/fruit/seed	soft_rot	partly_aquatic	0	0	filamentous_mycelium	perithecium_(hymenium_hidden,_narrow_opening)	closed	0	0	0	0
OTU0923	Leptosillia	0.000842566	0	jrk05920	Ascomycota	Arthoniomycetes	Arthoniales	Opegraphaceae	Opegrapha		lichenized		saprotroph_unspecified_some_species					non-aquatic			thallus_photosynthetic	apothecium_(hymenium_on_surface)	smooth			trentepohlioid		0	plant_pathogen	0	0	0	unspecified_plant_pathogen	0	0	non-aquatic	0	0	filamentous_mycelium	perithecium_(hymenium_hidden,_narrow_opening)	closed	0	0	0	0
OTU0924	Cladophialophora	0	0.00164818	jrk06108	Ascomycota	Arthoniomycetes	Arthoniales	Opegraphaceae	Paraingaderia		lichenized							non-aquatic			thallus_photosynthetic	apothecium_(hymenium_on_surface)	smooth			trentepohlioid		0	soil_saprotroph	root_endophyte_dark_septate	mycoparasite_some_species,animal_pathogen_some_species	root_endophyte_dark_septate	0	soil	0	non-aquatic	animal_parasite/opportunistic_human_parasite	0	dimorphic_yeast	0	0	0	0	0	0
OTU0925	Symbiotaphrina	0.000842566	0	jrk06111	Ascomycota	Arthoniomycetes	Arthoniales	Opegraphaceae	Paralecanographa		lichenized							non-aquatic			thallus_photosynthetic	apothecium_(hymenium_on_surface)	smooth			trentepohlioid		0	animal_endosymbiont	litter_saprotroph	0	0	0	leaf/fruit/seed	0	non-aquatic	animal_endosymbiont	0	yeast	0	0	0	0	0	0
OTU0926	Colacogloea	0.000842566	0	jrk06165	Ascomycota	Arthoniomycetes	Arthoniales	Opegraphaceae	Paraschismatomma		lichenized							non-aquatic			thallus_photosynthetic	apothecium_(hymenium_on_surface)	smooth			trentepohlioid		0	mycoparasite	fungal_decomposer	0	no_endophytic_capacity	0	fungal_material	0	non-aquatic	0	0	dimorphic_yeast	none	none	0	0	0	0
OTU0927	Saccharomyces	0.000842566	0	jrk06295	Ascomycota	Arthoniomycetes	Arthoniales	Opegraphaceae	Pentagenella		lichenized							non-aquatic			thallus_photosynthetic	apothecium_(hymenium_on_surface)	smooth			trentepohlioid		0	nectar/tap_saprotroph	0	0	0	0	sugar-rich_substrates	0	partly_aquatic	arthropod-associated	0	yeast	none	none	0	0	0	0
OTU0928	Gymnoascus	0.000842566	0	jrk07852	Ascomycota	Arthoniomycetes	Arthoniales	Opegraphaceae	Schizopelte		lichenized							non-aquatic			thallus_photosynthetic	apothecium_(hymenium_on_surface)	smooth					0	soil_saprotroph	0	0	0	0	soil	0	non-aquatic	0	0	filamentous_mycelium	cleistothecium_(closed,_spherical)	closed	0	0	0	0
OTU0929	Lophiotrema	0	0.00164818	jrk07893	Ascomycota	Arthoniomycetes	Arthoniales	Opegraphaceae	Sclerophyton		lichenized							non-aquatic			thallus_photosynthetic	apothecium_(hymenium_on_surface)	smooth			trentepohlioid		0	wood_saprotroph	0	0	no_endophytic_capacity	0	wood	0	partly_aquatic	0	0	filamentous_mycelium	perithecium_(hymenium_hidden,_narrow_opening)	closed	0	0	0	0
OTU0930	Symbiotaphrina	0.000842566	0	jrk08162	Ascomycota	Arthoniomycetes	Arthoniales	Opegraphaceae	Sparria		lichenized							non-aquatic			thallus_photosynthetic	apothecium_(hymenium_on_surface)	smooth			trentepohlioid		0	animal_endosymbiont	litter_saprotroph	0	0	0	leaf/fruit/seed	0	non-aquatic	animal_endosymbiont	0	yeast	0	0	0	0	0	0
OTU0931	Penicillium	0	0.00164818	jrk00376	Ascomycota	Arthoniomycetes	Arthoniales	Roccellaceae	Ancistrosporella		lichenized							non-aquatic			thallus_photosynthetic	apothecium_(hymenium_on_surface)	smooth					0	unspecified_saprotroph	foliar_endophyte	toxin-producing,animal_parasite_some_species,mycoparasite_some_species	foliar_endophyte	0	soil	mold	partly_aquatic	opportunistic_human_parasite	0	filamentous_mycelium	0	0	0	0	0	0
OTU0932	Talaromyces	0	0.00164818	jrk00827	Ascomycota	Arthoniomycetes	Arthoniales	Roccellaceae	Austrographa		lichenized							non-aquatic			thallus_photosynthetic	apothecium_(hymenium_on_surface)	smooth			trentepohlioid		0	unspecified_saprotroph	0	hyperviariable,_thermophile,_some_species_animal_parasite_some_species_various_saprotrophs	0	0	leaf/fruit/seed,soil,animal_material	mold	partly_aquatic	opportunistic_human_parasite	0	filamentous_mycelium	0	0	0	0	0	0
OTU0933	Xylaria	0	0.00164818	jrk00839	Ascomycota	Arthoniomycetes	Arthoniales	Roccellaceae	Austroroccella		lichenized							non-aquatic			thallus_photosynthetic	apothecium_(hymenium_on_surface)	smooth			trentepohlioid		0	wood_saprotroph	litter_saprotroph	0	foliar_endophyte	0	wood,leaf/fruit/seed	0	non-aquatic	0	angiosperms	filamentous_mycelium	perithecium_(hymenium_hidden,_narrow_opening)	closed	0	0	0	0
OTU0934	Rhodotorula	0.000842566	0	jrk01689	Ascomycota	Arthoniomycetes	Arthoniales	Roccellaceae	Chiodecton		lichenized							non-aquatic			thallus_photosynthetic	apothecium_(hymenium_on_surface)	smooth			trentepohlioid		0	unspecified_saprotroph	foliar_endophyte	0	foliar_endophyte	0	0	0	partly_aquatic	opportunistic_human_parasite	0	yeast	none	none	0	0	0	0
OTU0935	Lophium	0.000842566	0	jrk02146	Ascomycota	Arthoniomycetes	Arthoniales	Roccellaceae	Cresponea		lichenized							non-aquatic			thallus_photosynthetic	apothecium_(hymenium_on_surface)	smooth			trentepohlioid		0	litter_saprotroph	0	0	0	0	leaf/fruit/seed	0	non-aquatic	0	0	filamentous_mycelium	0	0	0	0	0	0
OTU0936	Lophium	0.000842566	0	jrk02159	Ascomycota	Arthoniomycetes	Arthoniales	Roccellaceae	Crocellina		lichenized							non-aquatic			thallus_photosynthetic	apothecium_(hymenium_on_surface)	smooth			trentepohlioid		0	litter_saprotroph	0	0	0	0	leaf/fruit/seed	0	non-aquatic	0	0	filamentous_mycelium	0	0	0	0	0	0
OTU0937	Rozellomycota genus Incertae sedis	0	0.00164818	jrk02453	Ascomycota	Arthoniomycetes	Arthoniales	Roccellaceae	Dendrographa		lichenized							non-aquatic			thallus_photosynthetic	apothecium_(hymenium_on_surface)	smooth			trentepohlioid		#N/A	#N/A	#N/A	#N/A	#N/A	#N/A	#N/A	#N/A	#N/A	#N/A	#N/A	#N/A	#N/A	#N/A	#N/A	#N/A	#N/A	#N/A
OTU0938	Colacogloea	0.000842566	0	jrk02558	Ascomycota	Arthoniomycetes	Arthoniales	Roccellaceae	Dichosporidium		lichenized							non-aquatic			thallus_photosynthetic	apothecium_(hymenium_on_surface)	smooth			trentepohlioid		0	mycoparasite	fungal_decomposer	0	no_endophytic_capacity	0	fungal_material	0	non-aquatic	0	0	dimorphic_yeast	none	none	0	0	0	0
OTU0939	Leptospora	0.000842566	0	jrk02697	Ascomycota	Arthoniomycetes	Arthoniales	Roccellaceae	Dirina		lichenized							non-aquatic			thallus_photosynthetic	apothecium_(hymenium_on_surface)	smooth			trentepohlioid		0	litter_saprotroph	0	0	0	0	leaf/fruit/seed	0	non-aquatic	0	0	filamentous_mycelium	0	0	0	0	0	0
OTU0940	Guomyces	0.000842566	0	jrk02700	Ascomycota	Arthoniomycetes	Arthoniales	Roccellaceae	Diromma		lichenized							non-aquatic			thallus_photosynthetic	apothecium_(hymenium_on_surface)	smooth			trentepohlioid		#N/A	#N/A	#N/A	#N/A	#N/A	#N/A	#N/A	#N/A	#N/A	#N/A	#N/A	#N/A	#N/A	#N/A	#N/A	#N/A	#N/A	#N/A
OTU0941		0.000842566	0	jrk02955	Ascomycota	Arthoniomycetes	Arthoniales	Roccellaceae	Enterodictyon		lichenized							non-aquatic			thallus_photosynthetic	apothecium_(hymenium_on_surface)	smooth					#N/A	#N/A	#N/A	#N/A	#N/A	#N/A	#N/A	#N/A	#N/A	#N/A	#N/A	#N/A	#N/A	#N/A	#N/A	#N/A	#N/A	#N/A
OTU0942	Fungi genus Incertae sedis	0.000842566	0	jrk02956	Ascomycota	Arthoniomycetes	Arthoniales	Roccellaceae	Enterographa		lichenized							non-aquatic			thallus_photosynthetic	apothecium_(hymenium_on_surface)	smooth			trentepohlioid		#N/A	#N/A	#N/A	#N/A	#N/A	#N/A	#N/A	#N/A	#N/A	#N/A	#N/A	#N/A	#N/A	#N/A	#N/A	#N/A	#N/A	#N/A
OTU0943	Fungi genus Incertae sedis	0.000842566	0	jrk03044	Ascomycota	Arthoniomycetes	Arthoniales	Roccellaceae	Erythrodecton		lichenized							non-aquatic			thallus_photosynthetic	apothecium_(hymenium_on_surface)	smooth			trentepohlioid		#N/A	#N/A	#N/A	#N/A	#N/A	#N/A	#N/A	#N/A	#N/A	#N/A	#N/A	#N/A	#N/A	#N/A	#N/A	#N/A	#N/A	#N/A
OTU0944	Colacogloea	0.000842566	0	jrk03232	Ascomycota	Arthoniomycetes	Arthoniales	Roccellaceae	Follmanniella		lichenized							non-aquatic			thallus_photosynthetic	apothecium_(hymenium_on_surface)	smooth			trentepohlioid		0	mycoparasite	fungal_decomposer	0	no_endophytic_capacity	0	fungal_material	0	non-aquatic	0	0	dimorphic_yeast	none	none	0	0	0	0
OTU0945	Mortierella	0	0.00164818	jrk03520	Ascomycota	Arthoniomycetes	Arthoniales	Roccellaceae	Gorgadesia		lichenized							non-aquatic			thallus_photosynthetic	apothecium_(hymenium_on_surface)	smooth			trentepohlioid		0	soil_saprotroph	root-associated	0	root-associated	root-associated	roots,soil	chitinolytic	partly_aquatic	opportunistic_human_parasite	0	filamentous_mycelium	none	none	0	0	0	0
OTU0946	Sarea	0.000842566	0	jrk03541	Ascomycota	Arthoniomycetes	Arthoniales	Roccellaceae	Graphidastra		lichenized							non-aquatic			thallus_photosynthetic	apothecium_(hymenium_on_surface)	smooth			trentepohlioid		0	unspecified_saprotroph	0	0	0	0	0	0	0	0	0	filamentous_mycelium	apothecium_(hymenium_on_surface)	smooth	0	0	0	0
OTU0947	Fungi genus Incertae sedis	0.000842566	0	jrk03613	Ascomycota	Arthoniomycetes	Arthoniales	Roccellaceae	Gyrographa		lichenized							non-aquatic			thallus_photosynthetic	apothecium_(hymenium_on_surface)	smooth			trentepohlioid		#N/A	#N/A	#N/A	#N/A	#N/A	#N/A	#N/A	#N/A	#N/A	#N/A	#N/A	#N/A	#N/A	#N/A	#N/A	#N/A	#N/A	#N/A
OTU0948	Guomyces	0.000842566	0	jrk03615	Ascomycota	Arthoniomycetes	Arthoniales	Roccellaceae	Gyronactis		lichenized							non-aquatic			thallus_photosynthetic	apothecium_(hymenium_on_surface)	smooth			trentepohlioid		#N/A	#N/A	#N/A	#N/A	#N/A	#N/A	#N/A	#N/A	#N/A	#N/A	#N/A	#N/A	#N/A	#N/A	#N/A	#N/A	#N/A	#N/A
OTU0949	Aureobasidium	0.000842566	0	jrk03648	Ascomycota	Arthoniomycetes	Arthoniales	Roccellaceae	Halographis		lichenized		lichenized_loosely					partly_marine_(partly_non-aquatic)			thallus_photosynthetic	apothecium_(hymenium_on_surface)	smooth			cyanobacterial		0	sooty_mold	litter_saprotroph	hyperviariable	foliar_endophyte	leaf/fruit/seed_pathogen	leaf/fruit/seed,roots,animal_material,sugar-rich_substrates	0	partly_aquatic	animal_parasite	0	dimorphic_yeast	0	0	0	0	0	0
OTU0950	Guomyces	0.000842566	0	jrk03685	Ascomycota	Arthoniomycetes	Arthoniales	Roccellaceae	Haplodina		lichenized							non-aquatic			thallus_photosynthetic	apothecium_(hymenium_on_surface)	smooth			cyanobacterial		#N/A	#N/A	#N/A	#N/A	#N/A	#N/A	#N/A	#N/A	#N/A	#N/A	#N/A	#N/A	#N/A	#N/A	#N/A	#N/A	#N/A	#N/A
OTU0951	Guomyces	0.000842566	0	jrk04180	Ascomycota	Arthoniomycetes	Arthoniales	Roccellaceae	Isalonactis		lichenized							non-aquatic			thallus_photosynthetic	apothecium_(hymenium_on_surface)	smooth			trentepohlioid		#N/A	#N/A	#N/A	#N/A	#N/A	#N/A	#N/A	#N/A	#N/A	#N/A	#N/A	#N/A	#N/A	#N/A	#N/A	#N/A	#N/A	#N/A
OTU0952		0.000842566	0	jrk04517	Ascomycota	Arthoniomycetes	Arthoniales	Roccellaceae	Lecanactis		lichenized							non-aquatic			thallus_photosynthetic	apothecium_(hymenium_on_surface)	smooth			trentepohlioid		#N/A	#N/A	#N/A	#N/A	#N/A	#N/A	#N/A	#N/A	#N/A	#N/A	#N/A	#N/A	#N/A	#N/A	#N/A	#N/A	#N/A	#N/A
OTU0953	Guomyces	0.000842566	0	jrk04962	Ascomycota	Arthoniomycetes	Arthoniales	Roccellaceae	Mazosia		lichenized							non-aquatic			thallus_photosynthetic	apothecium_(hymenium_on_surface)	smooth			trentepohlioid		#N/A	#N/A	#N/A	#N/A	#N/A	#N/A	#N/A	#N/A	#N/A	#N/A	#N/A	#N/A	#N/A	#N/A	#N/A	#N/A	#N/A	#N/A
OTU0954	Pseudomicrostroma	0.000842566	0	jrk05709	Ascomycota	Arthoniomycetes	Arthoniales	Roccellaceae	Neosergipea		lichenized							non-aquatic			thallus_photosynthetic	apothecium_(hymenium_on_surface)	smooth			trentepohlioid		0	plant_pathogen	epiphyte	0	no_endophytic_capacity	leaf/fruit/seed_pathogen	0	0	non-aquatic	0	Juglandaceae	dimorphic_yeast	none	none	0	0	0	0
OTU0955	Guomyces	0.000842566	0	jrk05849	Ascomycota	Arthoniomycetes	Arthoniales	Roccellaceae	Ocellomma		lichenized							non-aquatic			thallus_photosynthetic	apothecium_(hymenium_on_surface)	smooth			trentepohlioid		#N/A	#N/A	#N/A	#N/A	#N/A	#N/A	#N/A	#N/A	#N/A	#N/A	#N/A	#N/A	#N/A	#N/A	#N/A	#N/A	#N/A	#N/A
OTU0956	Guomyces	0.000842566	0	jrk06967	Ascomycota	Arthoniomycetes	Arthoniales	Roccellaceae	Protoroccella		lichenized							non-aquatic			thallus_photosynthetic	apothecium_(hymenium_on_surface)	smooth			trentepohlioid		#N/A	#N/A	#N/A	#N/A	#N/A	#N/A	#N/A	#N/A	#N/A	#N/A	#N/A	#N/A	#N/A	#N/A	#N/A	#N/A	#N/A	#N/A
OTU0957	Guomyces	0.000842566	0	jrk07111	Ascomycota	Arthoniomycetes	Arthoniales	Roccellaceae	Pseudolecanactis		lichenized							non-aquatic			thallus_photosynthetic							#N/A	#N/A	#N/A	#N/A	#N/A	#N/A	#N/A	#N/A	#N/A	#N/A	#N/A	#N/A	#N/A	#N/A	#N/A	#N/A	#N/A	#N/A
OTU0958	Guomyces	0.000842566	0	jrk07200	Ascomycota	Arthoniomycetes	Arthoniales	Roccellaceae	Pseudoschismatomma		lichenized							non-aquatic			thallus_photosynthetic	apothecium_(hymenium_on_surface)	smooth			trentepohlioid		#N/A	#N/A	#N/A	#N/A	#N/A	#N/A	#N/A	#N/A	#N/A	#N/A	#N/A	#N/A	#N/A	#N/A	#N/A	#N/A	#N/A	#N/A
OTU0959	Sarea	0.000842566	0	jrk07270	Ascomycota	Arthoniomycetes	Arthoniales	Roccellaceae	Psoronactis		lichenized							non-aquatic			thallus_photosynthetic	apothecium_(hymenium_on_surface)	smooth			trentepohlioid		0	unspecified_saprotroph	0	0	0	0	0	0	0	0	0	filamentous_mycelium	apothecium_(hymenium_on_surface)	smooth	0	0	0	0
OTU0960	Eurotiomycetes genus Incertae sedis	0.000842566	0	jrk07308	Ascomycota	Arthoniomycetes	Arthoniales	Roccellaceae	Pulvinodecton		lichenized							non-aquatic			thallus_photosynthetic	apothecium_(hymenium_on_surface)	smooth			trentepohlioid		#N/A	#N/A	#N/A	#N/A	#N/A	#N/A	#N/A	#N/A	#N/A	#N/A	#N/A	#N/A	#N/A	#N/A	#N/A	#N/A	#N/A	#N/A
OTU0961	Mortierella	0	0.00164818	jrk07653	Ascomycota	Arthoniomycetes	Arthoniales	Roccellaceae	Roccella		lichenized							non-aquatic			thallus_photosynthetic	apothecium_(hymenium_on_surface)	smooth			trentepohlioid		0	soil_saprotroph	root-associated	0	root-associated	root-associated	roots,soil	chitinolytic	partly_aquatic	opportunistic_human_parasite	0	filamentous_mycelium	none	none	0	0	0	0
OTU0962	Eurotiomycetes genus Incertae sedis	0.000842566	0	jrk09647	Ascomycota	Arthoniomycetes	Arthoniales	Roccellaceae	Roccellaria		lichenized							non-aquatic			thallus_photosynthetic	apothecium_(hymenium_on_surface)	smooth			trentepohlioid		#N/A	#N/A	#N/A	#N/A	#N/A	#N/A	#N/A	#N/A	#N/A	#N/A	#N/A	#N/A	#N/A	#N/A	#N/A	#N/A	#N/A	#N/A
OTU0963	Verrucaria	0	0.00164818	jrk07654	Ascomycota	Arthoniomycetes	Arthoniales	Roccellaceae	Roccellina		lichenized							non-aquatic			thallus_photosynthetic	apothecium_(hymenium_on_surface)	smooth			trentepohlioid		0	lichenized	0	0	0	0	0	0	partly_aquatic	0	0	thallus_photosynthetic	0	0	0	0	chlorococcoid	0
OTU0964	Eurotiomycetes genus Incertae sedis	0.000842566	0	jrk07755	Ascomycota	Arthoniomycetes	Arthoniales	Roccellaceae	Sagenidiopsis		lichenized							non-aquatic			thallus_photosynthetic	apothecium_(hymenium_on_surface)	smooth			trentepohlioid		#N/A	#N/A	#N/A	#N/A	#N/A	#N/A	#N/A	#N/A	#N/A	#N/A	#N/A	#N/A	#N/A	#N/A	#N/A	#N/A	#N/A	#N/A
OTU0965	Eurotiomycetes genus Incertae sedis	0.000842566	0	jrk07845	Ascomycota	Arthoniomycetes	Arthoniales	Roccellaceae	Schismatomma		lichenized							non-aquatic			thallus_photosynthetic	apothecium_(hymenium_on_surface)	smooth			trentepohlioid		#N/A	#N/A	#N/A	#N/A	#N/A	#N/A	#N/A	#N/A	#N/A	#N/A	#N/A	#N/A	#N/A	#N/A	#N/A	#N/A	#N/A	#N/A
OTU0966	Russula	0	0.00164818	jrk08057	Ascomycota	Arthoniomycetes	Arthoniales	Roccellaceae	Sigridea		lichenized							non-aquatic			thallus_photosynthetic	apothecium_(hymenium_on_surface)	smooth			trentepohlioid		0	ectomycorrhizal	0	0	0	0	0	0	non-aquatic	0	0	filamentous_mycelium	agaricoid	gills	contact	/russula-lactarius	0	0
OTU0967	Colacogloea	0.000842566	0	jrk08063	Ascomycota	Arthoniomycetes	Arthoniales	Roccellaceae	Simonyella		lichenized							non-aquatic			thallus_photosynthetic	apothecium_(hymenium_on_surface)	smooth			trentepohlioid		0	mycoparasite	fungal_decomposer	0	no_endophytic_capacity	0	fungal_material	0	non-aquatic	0	0	dimorphic_yeast	none	none	0	0	0	0
OTU0968		0.000842566	0	jrk08080	Ascomycota	Arthoniomycetes	Arthoniales	Roccellaceae	Sipmania		lichenized							non-aquatic			thallus_photosynthetic							#N/A	#N/A	#N/A	#N/A	#N/A	#N/A	#N/A	#N/A	#N/A	#N/A	#N/A	#N/A	#N/A	#N/A	#N/A	#N/A	#N/A	#N/A
OTU0969	Eurotiomycetes genus Incertae sedis	0.000842566	0	jrk08448	Ascomycota	Arthoniomycetes	Arthoniales	Roccellaceae	Streimannia		lichenized							non-aquatic			thallus_photosynthetic	perithecium_(hymenium_hidden,_narrow_opening)	closed			trentepohlioid		#N/A	#N/A	#N/A	#N/A	#N/A	#N/A	#N/A	#N/A	#N/A	#N/A	#N/A	#N/A	#N/A	#N/A	#N/A	#N/A	#N/A	#N/A
OTU0970	Basidiomycota genus Incertae sedis	0.000842566	0	jrk08555	Ascomycota	Arthoniomycetes	Arthoniales	Roccellaceae	Syncesia		lichenized							non-aquatic			thallus_photosynthetic	other				trentepohlioid		#N/A	#N/A	#N/A	#N/A	#N/A	#N/A	#N/A	#N/A	#N/A	#N/A	#N/A	#N/A	#N/A	#N/A	#N/A	#N/A	#N/A	#N/A
OTU0971	Basidiomycota genus Incertae sedis	0.000842566	0	jrk08655	Ascomycota	Arthoniomycetes	Arthoniales	Roccellaceae	Tania		lichenized							non-aquatic			thallus_photosynthetic	apothecium_(hymenium_on_surface)	smooth			trentepohlioid		#N/A	#N/A	#N/A	#N/A	#N/A	#N/A	#N/A	#N/A	#N/A	#N/A	#N/A	#N/A	#N/A	#N/A	#N/A	#N/A	#N/A	#N/A
OTU0972	Eurotiomycetes genus Incertae sedis	0.000842566	0	jrk09335	Ascomycota	Arthoniomycetes	Arthoniales	Roccellaceae	Vigneronia		lichenized							non-aquatic			thallus_photosynthetic	apothecium_(hymenium_on_surface)	smooth			trentepohlioid		#N/A	#N/A	#N/A	#N/A	#N/A	#N/A	#N/A	#N/A	#N/A	#N/A	#N/A	#N/A	#N/A	#N/A	#N/A	#N/A	#N/A	#N/A
OTU0973	Eurotiomycetes genus Incertae sedis	0.000842566	0	jrk00387	Ascomycota	Arthoniomycetes	Arthoniales	Roccellographaceae	Angiactis		lichenized							non-aquatic			thallus_photosynthetic	apothecium_(hymenium_on_surface)	smooth			trentepohlioid		#N/A	#N/A	#N/A	#N/A	#N/A	#N/A	#N/A	#N/A	#N/A	#N/A	#N/A	#N/A	#N/A	#N/A	#N/A	#N/A	#N/A	#N/A
OTU0974	Basidiomycota genus Incertae sedis	0.000842566	0	jrk00604	Ascomycota	Arthoniomycetes	Arthoniales	Roccellographaceae	Arthophacopsis		lichen_parasite	fungal_decomposer				fungal_material,algal_material		non-aquatic			filamentous_mycelium	apothecium_(hymenium_on_surface)	smooth					#N/A	#N/A	#N/A	#N/A	#N/A	#N/A	#N/A	#N/A	#N/A	#N/A	#N/A	#N/A	#N/A	#N/A	#N/A	#N/A	#N/A	#N/A
OTU0975	Eurotiomycetes genus Incertae sedis	0.000842566	0	jrk00866	Ascomycota	Arthoniomycetes	Arthoniales	Roccellographaceae	Bactrospora		lichenized							non-aquatic			thallus_photosynthetic	apothecium_(hymenium_on_surface)	smooth			trentepohlioid		#N/A	#N/A	#N/A	#N/A	#N/A	#N/A	#N/A	#N/A	#N/A	#N/A	#N/A	#N/A	#N/A	#N/A	#N/A	#N/A	#N/A	#N/A
OTU0976	Gloniopsis	0.000842566	0	jrk01224	Ascomycota	Arthoniomycetes	Arthoniales	Roccellographaceae	Bryostigma		lichenized							non-aquatic			thallus_photosynthetic	apothecium_(hymenium_on_surface)	smooth			chlorococcoid		0	wood_saprotroph	0	0	0	0	wood	other	non-aquatic	0	0	filamentous_mycelium	hysterothecium_(opening_slith-like)	closed	0	0	0	0
OTU0977	Rozellomycota genus Incertae sedis	0.000842566	0	jrk01470	Ascomycota	Arthoniomycetes	Arthoniales	Roccellographaceae	Catarraphia		lichenized							non-aquatic			thallus_photosynthetic	apothecium_(hymenium_on_surface)	smooth					#N/A	#N/A	#N/A	#N/A	#N/A	#N/A	#N/A	#N/A	#N/A	#N/A	#N/A	#N/A	#N/A	#N/A	#N/A	#N/A	#N/A	#N/A
OTU0978	Eurotiomycetes genus Incertae sedis	0.000842566	0	jrk09648	Ascomycota	Arthoniomycetes	Arthoniales	Roccellographaceae	Dimidiographa		lichenized							non-aquatic			thallus_photosynthetic	apothecium_(hymenium_on_surface)	smooth			trentepohlioid		#N/A	#N/A	#N/A	#N/A	#N/A	#N/A	#N/A	#N/A	#N/A	#N/A	#N/A	#N/A	#N/A	#N/A	#N/A	#N/A	#N/A	#N/A
OTU0979	Mortierella	0	0.00164818	jrk03146	Ascomycota	Arthoniomycetes	Arthoniales	Roccellographaceae	Felipes		lichenized							non-aquatic			thallus_photosynthetic	apothecium_(hymenium_on_surface)	smooth			trentepohlioid		0	soil_saprotroph	root-associated	0	root-associated	root-associated	roots,soil	chitinolytic	partly_aquatic	opportunistic_human_parasite	0	filamentous_mycelium	none	none	0	0	0	0
OTU0980	Neodevriesia	0.000842566	0	jrk03269	Ascomycota	Arthoniomycetes	Arthoniales	Roccellographaceae	Fulvophyton		lichenized							non-aquatic			thallus_photosynthetic	apothecium_(hymenium_on_surface)	smooth			trentepohlioid		0	plant_pathogen	litter_saprotroph	0	0	leaf/fruit/seed_pathogen	leaf/fruit/seed	0	partly_aquatic	0	0	filamentous_mycelium	perithecium_(hymenium_hidden,_narrow_opening)	closed	0	0	0	0
OTU0981	Pringsheimia	0.000842566	0	jrk03490	Ascomycota	Arthoniomycetes	Arthoniales	Roccellographaceae	Glyphopsis		lichenized							non-aquatic			thallus_photosynthetic	apothecium_(hymenium_on_surface)	smooth			trentepohlioid		#N/A	#N/A	#N/A	#N/A	#N/A	#N/A	#N/A	#N/A	#N/A	#N/A	#N/A	#N/A	#N/A	#N/A	#N/A	#N/A	#N/A	#N/A
OTU0982	Eurotiomycetes genus Incertae sedis	0.000842566	0	jrk03524	Ascomycota	Arthoniomycetes	Arthoniales	Roccellographaceae	Gossypiothallon		lichenized							non-aquatic			thallus_photosynthetic	apothecium_(hymenium_on_surface)	smooth			trentepohlioid		#N/A	#N/A	#N/A	#N/A	#N/A	#N/A	#N/A	#N/A	#N/A	#N/A	#N/A	#N/A	#N/A	#N/A	#N/A	#N/A	#N/A	#N/A
OTU0983	Eurotiomycetes genus Incertae sedis	0.000842566	0	jrk03769	Ascomycota	Arthoniomycetes	Arthoniales	Roccellographaceae	Helminthocarpon		lichenized							non-aquatic			thallus_photosynthetic	apothecium_(hymenium_on_surface)	smooth			trentepohlioid		#N/A	#N/A	#N/A	#N/A	#N/A	#N/A	#N/A	#N/A	#N/A	#N/A	#N/A	#N/A	#N/A	#N/A	#N/A	#N/A	#N/A	#N/A
OTU0984	Basidiomycota genus Incertae sedis	0.000842566	0	jrk03921	Ascomycota	Arthoniomycetes	Arthoniales	Roccellographaceae	Hormosphaeria		lichenized							non-aquatic			thallus_photosynthetic							#N/A	#N/A	#N/A	#N/A	#N/A	#N/A	#N/A	#N/A	#N/A	#N/A	#N/A	#N/A	#N/A	#N/A	#N/A	#N/A	#N/A	#N/A
OTU0985	Basidiomycota genus Incertae sedis	0.000842566	0	jrk05206	Ascomycota	Arthoniomycetes	Arthoniales	Roccellographaceae	Minksia		lichenized							non-aquatic			thallus_photosynthetic							#N/A	#N/A	#N/A	#N/A	#N/A	#N/A	#N/A	#N/A	#N/A	#N/A	#N/A	#N/A	#N/A	#N/A	#N/A	#N/A	#N/A	#N/A
OTU0986	Eurotiomycetes genus Incertae sedis	0.000842566	0	jrk05772	Ascomycota	Arthoniomycetes	Arthoniales	Roccellographaceae	Nipholepis		epiphyte	litter_saprotroph				leaf/fruit/seed		non-aquatic			filamentous_mycelium							#N/A	#N/A	#N/A	#N/A	#N/A	#N/A	#N/A	#N/A	#N/A	#N/A	#N/A	#N/A	#N/A	#N/A	#N/A	#N/A	#N/A	#N/A
OTU0987	Basidiomycota genus Incertae sedis	0.000842566	0	jrk06091	Ascomycota	Arthoniomycetes	Arthoniales	Roccellographaceae	Paradoxomyces		lichen_parasite	fungal_decomposer				fungal_material,algal_material		non-aquatic			filamentous_mycelium	apothecium_(hymenium_on_surface)	smooth					#N/A	#N/A	#N/A	#N/A	#N/A	#N/A	#N/A	#N/A	#N/A	#N/A	#N/A	#N/A	#N/A	#N/A	#N/A	#N/A	#N/A	#N/A
OTU0988	Mortierella	0	0.00164818	jrk06313	Ascomycota	Arthoniomycetes	Arthoniales	Roccellographaceae	Perigrapha		lichen_parasite	fungal_decomposer				fungal_material,algal_material		non-aquatic			filamentous_mycelium	perithecium_(hymenium_hidden,_narrow_opening)	closed					0	soil_saprotroph	root-associated	0	root-associated	root-associated	roots,soil	chitinolytic	partly_aquatic	opportunistic_human_parasite	0	filamentous_mycelium	none	none	0	0	0	0
OTU0989	Basidiomycota genus Incertae sedis	0.000842566	0	jrk06363	Ascomycota	Arthoniomycetes	Arthoniales	Roccellographaceae	Phacothecium		lichen_parasite	fungal_decomposer				fungal_material,algal_material		non-aquatic			filamentous_mycelium	apothecium_(hymenium_on_surface)	smooth					#N/A	#N/A	#N/A	#N/A	#N/A	#N/A	#N/A	#N/A	#N/A	#N/A	#N/A	#N/A	#N/A	#N/A	#N/A	#N/A	#N/A	#N/A
OTU0990	Basidiomycota genus Incertae sedis	0.000842566	0	jrk06515	Ascomycota	Arthoniomycetes	Arthoniales	Roccellographaceae	Phoebus		lichenized							non-aquatic			thallus_photosynthetic	apothecium_(hymenium_on_surface)	smooth			trentepohlioid		#N/A	#N/A	#N/A	#N/A	#N/A	#N/A	#N/A	#N/A	#N/A	#N/A	#N/A	#N/A	#N/A	#N/A	#N/A	#N/A	#N/A	#N/A
OTU0991	Basidiomycota genus Incertae sedis	0.000842566	0	jrk07656	Ascomycota	Arthoniomycetes	Arthoniales	Roccellographaceae	Roccellographa		lichenized							non-aquatic			thallus_photosynthetic	apothecium_(hymenium_on_surface)	smooth			trentepohlioid		#N/A	#N/A	#N/A	#N/A	#N/A	#N/A	#N/A	#N/A	#N/A	#N/A	#N/A	#N/A	#N/A	#N/A	#N/A	#N/A	#N/A	#N/A
OTU0992	Basidiomycota genus Incertae sedis	0.000842566	0	jrk08294	Ascomycota	Arthoniomycetes	Arthoniales	Roccellographaceae	Sporostigma		lichenized							non-aquatic			thallus_photosynthetic	mazaedium_(pushpin-like)	other			trentepohlioid		#N/A	#N/A	#N/A	#N/A	#N/A	#N/A	#N/A	#N/A	#N/A	#N/A	#N/A	#N/A	#N/A	#N/A	#N/A	#N/A	#N/A	#N/A
OTU0993	Basidiomycota genus Incertae sedis	0.000842566	0	jrk08550	Ascomycota	Arthoniomycetes	Arthoniales	Roccellographaceae	Synarthonia		lichenized		lichen_parasite_in_early_stage					non-aquatic			thallus_photosynthetic	apothecium_(hymenium_on_surface)	smooth			trentepohlioid		#N/A	#N/A	#N/A	#N/A	#N/A	#N/A	#N/A	#N/A	#N/A	#N/A	#N/A	#N/A	#N/A	#N/A	#N/A	#N/A	#N/A	#N/A
OTU0994	Eurotiomycetes genus Incertae sedis	0.000842566	0	jrk08551	Ascomycota	Arthoniomycetes	Arthoniales	Roccellographaceae	Synarthothelium		lichenized							non-aquatic			thallus_photosynthetic	apothecium_(hymenium_on_surface)	smooth			trentepohlioid		#N/A	#N/A	#N/A	#N/A	#N/A	#N/A	#N/A	#N/A	#N/A	#N/A	#N/A	#N/A	#N/A	#N/A	#N/A	#N/A	#N/A	#N/A
OTU0995	Basidiomycota genus Incertae sedis	0.000842566	0	jrk08663	Ascomycota	Arthoniomycetes	Arthoniales	Roccellographaceae	Tarbertia		unspecified_saprotroph							non-aquatic			filamentous_mycelium							#N/A	#N/A	#N/A	#N/A	#N/A	#N/A	#N/A	#N/A	#N/A	#N/A	#N/A	#N/A	#N/A	#N/A	#N/A	#N/A	#N/A	#N/A
OTU0996	Basidiomycota genus Incertae sedis	0.000842566	0	jrk09007	Ascomycota	Arthoniomycetes	Arthoniales	Roccellographaceae	Trichophyma		lichen_parasite	fungal_decomposer				fungal_material,algal_material		non-aquatic			filamentous_mycelium	apothecium_(hymenium_on_surface)	smooth					#N/A	#N/A	#N/A	#N/A	#N/A	#N/A	#N/A	#N/A	#N/A	#N/A	#N/A	#N/A	#N/A	#N/A	#N/A	#N/A	#N/A	#N/A
OTU0997	Basidiomycota genus Incertae sedis	0.000842566	0	jrk09126	Ascomycota	Arthoniomycetes	Arthoniales	Roccellographaceae	Tylophorella		lichenized							non-aquatic			thallus_photosynthetic	apothecium_(hymenium_on_surface)	smooth			trentepohlioid		#N/A	#N/A	#N/A	#N/A	#N/A	#N/A	#N/A	#N/A	#N/A	#N/A	#N/A	#N/A	#N/A	#N/A	#N/A	#N/A	#N/A	#N/A
OTU0998	Basidiomycota genus Incertae sedis	0.000842566	0	jrk09262	Ascomycota	Arthoniomycetes	Arthoniales	Roccellographaceae	Wegea		unspecified_saprotroph							non-aquatic			filamentous_mycelium							#N/A	#N/A	#N/A	#N/A	#N/A	#N/A	#N/A	#N/A	#N/A	#N/A	#N/A	#N/A	#N/A	#N/A	#N/A	#N/A	#N/A	#N/A
OTU0999	Basidiomycota genus Incertae sedis	0.000842566	0	jrk03055	Ascomycota	Arthoniomycetes	Lichenostigmatales	Phaeococcomycetaceae	Etayoa		lichen_parasite	fungal_decomposer				fungal_material,algal_material		non-aquatic				none	none					#N/A	#N/A	#N/A	#N/A	#N/A	#N/A	#N/A	#N/A	#N/A	#N/A	#N/A	#N/A	#N/A	#N/A	#N/A	#N/A	#N/A	#N/A
OTU1000	Basidiomycota genus Incertae sedis	0.000842566	0	jrk04694	Ascomycota	Arthoniomycetes	Lichenostigmatales	Phaeococcomycetaceae	Lichenostigma		lichen_parasite	fungal_decomposer				fungal_material,algal_material		non-aquatic			filamentous_mycelium	perithecium_(hymenium_hidden,_narrow_opening)	closed					#N/A	#N/A	#N/A	#N/A	#N/A	#N/A	#N/A	#N/A	#N/A	#N/A	#N/A	#N/A	#N/A	#N/A	#N/A	#N/A	#N/A	#N/A
OTU1001	Basidiomycota genus Incertae sedis	0.000842566	0	jrk06377	Ascomycota	Arthoniomycetes	Lichenostigmatales	Phaeococcomycetaceae	Phaeococcomyces		unspecified_saprotroph							non-aquatic			dimorphic_yeast							#N/A	#N/A	#N/A	#N/A	#N/A	#N/A	#N/A	#N/A	#N/A	#N/A	#N/A	#N/A	#N/A	#N/A	#N/A	#N/A	#N/A	#N/A
OTU1002	Basidiomycota genus Incertae sedis	0.000842566	0	jrk08028	Ascomycota	Arthoniomycetes	Lichenostigmatales	Seuratiaceae	Seuratia		plant_pathogen				leaf/fruit/seed_pathogen			non-aquatic			filamentous_mycelium							#N/A	#N/A	#N/A	#N/A	#N/A	#N/A	#N/A	#N/A	#N/A	#N/A	#N/A	#N/A	#N/A	#N/A	#N/A	#N/A	#N/A	#N/A
OTU1003	Basidiomycota genus Incertae sedis	0.000842566	0	jrk00007	Ascomycota	Ascomycota class incertae sedis	Ascomycota order incertae sedis	Ascomycota family incertae sedis	Abropelta		unspecified_symbiotroph		lichenized_or_lichenicolous_unsettled															#N/A	#N/A	#N/A	#N/A	#N/A	#N/A	#N/A	#N/A	#N/A	#N/A	#N/A	#N/A	#N/A	#N/A	#N/A	#N/A	#N/A	#N/A
OTU1004	Basidiomycota genus Incertae sedis	0.000842566	0	jrk00034	Ascomycota	Ascomycota class incertae sedis	Ascomycota order incertae sedis	Ascomycota family incertae sedis	Acarella		foliar_endophyte	litter_saprotroph		foliar_endophyte		leaf/fruit/seed		non-aquatic			filamentous_mycelium							#N/A	#N/A	#N/A	#N/A	#N/A	#N/A	#N/A	#N/A	#N/A	#N/A	#N/A	#N/A	#N/A	#N/A	#N/A	#N/A	#N/A	#N/A
OTU1005	Basidiomycota genus Incertae sedis	0.000842566	0	jrk00035	Ascomycota	Ascomycota class incertae sedis	Ascomycota order incertae sedis	Ascomycota family incertae sedis	Acarellina		unspecified_symbiotroph		lichenized_or_lichenicolous_unsettled															#N/A	#N/A	#N/A	#N/A	#N/A	#N/A	#N/A	#N/A	#N/A	#N/A	#N/A	#N/A	#N/A	#N/A	#N/A	#N/A	#N/A	#N/A
OTU1006	Basidiomycota genus Incertae sedis	0.000842566	0	jrk00037	Ascomycota	Ascomycota class incertae sedis	Ascomycota order incertae sedis	Ascomycota family incertae sedis	Acaroconium		lichen_parasite	fungal_decomposer				fungal_material,algal_material		non-aquatic				none	none					#N/A	#N/A	#N/A	#N/A	#N/A	#N/A	#N/A	#N/A	#N/A	#N/A	#N/A	#N/A	#N/A	#N/A	#N/A	#N/A	#N/A	#N/A
OTU1007	Basidiomycota genus Incertae sedis	0.000842566	0	jrk00038	Ascomycota	Ascomycota class incertae sedis	Ascomycota order incertae sedis	Ascomycota family incertae sedis	Acarocybe		unspecified_symbiotroph		lichenized_or_lichenicolous_unsettled															#N/A	#N/A	#N/A	#N/A	#N/A	#N/A	#N/A	#N/A	#N/A	#N/A	#N/A	#N/A	#N/A	#N/A	#N/A	#N/A	#N/A	#N/A
OTU1008	Basidiomycota genus Incertae sedis	0.000842566	0	jrk00039	Ascomycota	Ascomycota class incertae sedis	Ascomycota order incertae sedis	Ascomycota family incertae sedis	Acarocybella		unspecified_symbiotroph		lichenized_or_lichenicolous_unsettled															#N/A	#N/A	#N/A	#N/A	#N/A	#N/A	#N/A	#N/A	#N/A	#N/A	#N/A	#N/A	#N/A	#N/A	#N/A	#N/A	#N/A	#N/A
OTU1009	Basidiomycota genus Incertae sedis	0.000842566	0	jrk00040	Ascomycota	Ascomycota class incertae sedis	Ascomycota order incertae sedis	Ascomycota family incertae sedis	Acarocybellina		unspecified_symbiotroph		lichenized_or_lichenicolous_unsettled															#N/A	#N/A	#N/A	#N/A	#N/A	#N/A	#N/A	#N/A	#N/A	#N/A	#N/A	#N/A	#N/A	#N/A	#N/A	#N/A	#N/A	#N/A
OTU1010	Basidiomycota genus Incertae sedis	0.000842566	0	jrk00041	Ascomycota	Ascomycota class incertae sedis	Ascomycota order incertae sedis	Ascomycota family incertae sedis	Acarocybiopsis		wood_saprotroph					wood												#N/A	#N/A	#N/A	#N/A	#N/A	#N/A	#N/A	#N/A	#N/A	#N/A	#N/A	#N/A	#N/A	#N/A	#N/A	#N/A	#N/A	#N/A
OTU1011	Basidiomycota genus Incertae sedis	0.000842566	0	jrk00043	Ascomycota	Ascomycota class incertae sedis	Ascomycota order incertae sedis	Ascomycota family incertae sedis	Acaropeltis		unspecified_symbiotroph		lichenized_or_lichenicolous_unsettled															#N/A	#N/A	#N/A	#N/A	#N/A	#N/A	#N/A	#N/A	#N/A	#N/A	#N/A	#N/A	#N/A	#N/A	#N/A	#N/A	#N/A	#N/A
OTU1012	Basidiomycota genus Incertae sedis	0.000842566	0	jrk00060	Ascomycota	Ascomycota class incertae sedis	Ascomycota order incertae sedis	Ascomycota family incertae sedis	Achoropeltis		unspecified_symbiotroph		lichenized_or_lichenicolous_unsettled															#N/A	#N/A	#N/A	#N/A	#N/A	#N/A	#N/A	#N/A	#N/A	#N/A	#N/A	#N/A	#N/A	#N/A	#N/A	#N/A	#N/A	#N/A
OTU1013	Basidiomycota genus Incertae sedis	0.000842566	0	jrk00076	Ascomycota	Ascomycota class incertae sedis	Ascomycota order incertae sedis	Ascomycota family incertae sedis	Acleistia		unspecified_saprotroph																	#N/A	#N/A	#N/A	#N/A	#N/A	#N/A	#N/A	#N/A	#N/A	#N/A	#N/A	#N/A	#N/A	#N/A	#N/A	#N/A	#N/A	#N/A
OTU1014	Basidiomycota genus Incertae sedis	0.000842566	0	jrk00079	Ascomycota	Ascomycota class incertae sedis	Ascomycota order incertae sedis	Ascomycota family incertae sedis	Acontium																			#N/A	#N/A	#N/A	#N/A	#N/A	#N/A	#N/A	#N/A	#N/A	#N/A	#N/A	#N/A	#N/A	#N/A	#N/A	#N/A	#N/A	#N/A
OTU1015	Basidiomycota genus Incertae sedis	0.000842566	0	jrk00089	Ascomycota	Ascomycota class incertae sedis	Ascomycota order incertae sedis	Ascomycota family incertae sedis	Acrodictyella		wood_saprotroph					wood												#N/A	#N/A	#N/A	#N/A	#N/A	#N/A	#N/A	#N/A	#N/A	#N/A	#N/A	#N/A	#N/A	#N/A	#N/A	#N/A	#N/A	#N/A
OTU1016	Basidiomycota genus Incertae sedis	0.000842566	0	jrk00090	Ascomycota	Ascomycota class incertae sedis	Ascomycota order incertae sedis	Ascomycota family incertae sedis	Acrodictyopsis		litter_saprotroph					leaf/fruit/seed				Laurus								#N/A	#N/A	#N/A	#N/A	#N/A	#N/A	#N/A	#N/A	#N/A	#N/A	#N/A	#N/A	#N/A	#N/A	#N/A	#N/A	#N/A	#N/A
OTU1017	Basidiomycota genus Incertae sedis	0.000842566	0	jrk00092	Ascomycota	Ascomycota class incertae sedis	Ascomycota order incertae sedis	Ascomycota family incertae sedis	Acrodontiella		plant_pathogen				leaf/fruit/seed_pathogen					Fallopia								#N/A	#N/A	#N/A	#N/A	#N/A	#N/A	#N/A	#N/A	#N/A	#N/A	#N/A	#N/A	#N/A	#N/A	#N/A	#N/A	#N/A	#N/A
OTU1018	Basidiomycota genus Incertae sedis	0.000842566	0	jrk00098	Ascomycota	Ascomycota class incertae sedis	Ascomycota order incertae sedis	Ascomycota family incertae sedis	Acrophragmis		wood_saprotroph	litter_saprotroph				wood,leaf/fruit/seed												#N/A	#N/A	#N/A	#N/A	#N/A	#N/A	#N/A	#N/A	#N/A	#N/A	#N/A	#N/A	#N/A	#N/A	#N/A	#N/A	#N/A	#N/A
OTU1019	Basidiomycota genus Incertae sedis	0.000842566	0	jrk00104	Ascomycota	Ascomycota class incertae sedis	Ascomycota order incertae sedis	Ascomycota family incertae sedis	Acrostaurus		wood_saprotroph	litter_saprotroph				wood,leaf/fruit/seed												#N/A	#N/A	#N/A	#N/A	#N/A	#N/A	#N/A	#N/A	#N/A	#N/A	#N/A	#N/A	#N/A	#N/A	#N/A	#N/A	#N/A	#N/A
OTU1020	Basidiomycota genus Incertae sedis	0.000842566	0	jrk00108	Ascomycota	Ascomycota class incertae sedis	Ascomycota order incertae sedis	Ascomycota family incertae sedis	Actinocladium		litter_saprotroph					leaf/fruit/seed												#N/A	#N/A	#N/A	#N/A	#N/A	#N/A	#N/A	#N/A	#N/A	#N/A	#N/A	#N/A	#N/A	#N/A	#N/A	#N/A	#N/A	#N/A
OTU1021	Basidiomycota genus Incertae sedis	0.000842566	0	jrk00113	Ascomycota	Ascomycota class incertae sedis	Ascomycota order incertae sedis	Ascomycota family incertae sedis	Actinotexis		unspecified_symbiotroph		lichenized_or_lichenicolous_unsettled															#N/A	#N/A	#N/A	#N/A	#N/A	#N/A	#N/A	#N/A	#N/A	#N/A	#N/A	#N/A	#N/A	#N/A	#N/A	#N/A	#N/A	#N/A
OTU1022	Basidiomycota genus Incertae sedis	0.000842566	0	jrk00114	Ascomycota	Ascomycota class incertae sedis	Ascomycota order incertae sedis	Ascomycota family incertae sedis	Actinothecium		plant_pathogen				leaf/fruit/seed_pathogen													#N/A	#N/A	#N/A	#N/A	#N/A	#N/A	#N/A	#N/A	#N/A	#N/A	#N/A	#N/A	#N/A	#N/A	#N/A	#N/A	#N/A	#N/A
OTU1023	Basidiomycota genus Incertae sedis	0.000842566	0	jrk00115	Ascomycota	Ascomycota class incertae sedis	Ascomycota order incertae sedis	Ascomycota family incertae sedis	Actinothyrium		litter_saprotroph					leaf/fruit/seed												#N/A	#N/A	#N/A	#N/A	#N/A	#N/A	#N/A	#N/A	#N/A	#N/A	#N/A	#N/A	#N/A	#N/A	#N/A	#N/A	#N/A	#N/A
OTU1024	Basidiomycota genus Incertae sedis	0.000842566	0	jrk00118	Ascomycota	Ascomycota class incertae sedis	Ascomycota order incertae sedis	Ascomycota family incertae sedis	Acumispora		litter_saprotroph																	#N/A	#N/A	#N/A	#N/A	#N/A	#N/A	#N/A	#N/A	#N/A	#N/A	#N/A	#N/A	#N/A	#N/A	#N/A	#N/A	#N/A	#N/A
OTU1025	Basidiomycota genus Incertae sedis	0.000842566	0	jrk00149	Ascomycota	Ascomycota class incertae sedis	Ascomycota order incertae sedis	Ascomycota family incertae sedis	Agaricodochium		plant_pathogen				leaf/fruit/seed_pathogen					Camellia								#N/A	#N/A	#N/A	#N/A	#N/A	#N/A	#N/A	#N/A	#N/A	#N/A	#N/A	#N/A	#N/A	#N/A	#N/A	#N/A	#N/A	#N/A
OTU1026	Basidiomycota genus Incertae sedis	0.000842566	0	jrk00151	Ascomycota	Ascomycota class incertae sedis	Ascomycota order incertae sedis	Ascomycota family incertae sedis	Agarwalomyces		plant_pathogen				leaf/fruit/seed_pathogen					Lythraceae								#N/A	#N/A	#N/A	#N/A	#N/A	#N/A	#N/A	#N/A	#N/A	#N/A	#N/A	#N/A	#N/A	#N/A	#N/A	#N/A	#N/A	#N/A
OTU1027	Basidiomycota genus Incertae sedis	0.000842566	0	jrk00156	Ascomycota	Ascomycota class incertae sedis	Ascomycota order incertae sedis	Ascomycota family incertae sedis	Agrabeeja		plant_pathogen	litter_saprotroph			leaf/fruit/seed_pathogen	leaf/fruit/seed				Korthalsia								#N/A	#N/A	#N/A	#N/A	#N/A	#N/A	#N/A	#N/A	#N/A	#N/A	#N/A	#N/A	#N/A	#N/A	#N/A	#N/A	#N/A	#N/A
OTU1028	Basidiomycota genus Incertae sedis	0.000842566	0	jrk00159	Ascomycota	Ascomycota class incertae sedis	Ascomycota order incertae sedis	Ascomycota family incertae sedis	Agyriella		wood_saprotroph					wood												#N/A	#N/A	#N/A	#N/A	#N/A	#N/A	#N/A	#N/A	#N/A	#N/A	#N/A	#N/A	#N/A	#N/A	#N/A	#N/A	#N/A	#N/A
OTU1029	Basidiomycota genus Incertae sedis	0.000842566	0	jrk00160	Ascomycota	Ascomycota class incertae sedis	Ascomycota order incertae sedis	Ascomycota family incertae sedis	Agyriellopsis		wood_saprotroph	foliar_endophyte		foliar_endophyte		wood												#N/A	#N/A	#N/A	#N/A	#N/A	#N/A	#N/A	#N/A	#N/A	#N/A	#N/A	#N/A	#N/A	#N/A	#N/A	#N/A	#N/A	#N/A
OTU1030	Basidiomycota genus Incertae sedis	0.000842566	0	jrk00162	Ascomycota	Ascomycota class incertae sedis	Ascomycota order incertae sedis	Ascomycota family incertae sedis	Ahmadia																			#N/A	#N/A	#N/A	#N/A	#N/A	#N/A	#N/A	#N/A	#N/A	#N/A	#N/A	#N/A	#N/A	#N/A	#N/A	#N/A	#N/A	#N/A
OTU1031	Basidiomycota genus Incertae sedis	0.000842566	0	jrk00169	Ascomycota	Ascomycota class incertae sedis	Ascomycota order incertae sedis	Ascomycota family incertae sedis	Ajrekarella		litter_saprotroph					leaf/fruit/seed												#N/A	#N/A	#N/A	#N/A	#N/A	#N/A	#N/A	#N/A	#N/A	#N/A	#N/A	#N/A	#N/A	#N/A	#N/A	#N/A	#N/A	#N/A
OTU1032	Basidiomycota genus Incertae sedis	0.000842566	0	jrk00187	Ascomycota	Ascomycota class incertae sedis	Ascomycota order incertae sedis	Ascomycota family incertae sedis	Alciphila		litter_saprotroph		urinophile			leaf/fruit/seed												#N/A	#N/A	#N/A	#N/A	#N/A	#N/A	#N/A	#N/A	#N/A	#N/A	#N/A	#N/A	#N/A	#N/A	#N/A	#N/A	#N/A	#N/A
OTU1033	Basidiomycota genus Incertae sedis	0.000842566	0	jrk00205	Ascomycota	Ascomycota class incertae sedis	Ascomycota order incertae sedis	Ascomycota family incertae sedis	Algonquinia		wood_saprotroph					wood												#N/A	#N/A	#N/A	#N/A	#N/A	#N/A	#N/A	#N/A	#N/A	#N/A	#N/A	#N/A	#N/A	#N/A	#N/A	#N/A	#N/A	#N/A
OTU1034	Basidiomycota genus Incertae sedis	0.000842566	0	jrk00211	Ascomycota	Ascomycota class incertae sedis	Ascomycota order incertae sedis	Ascomycota family incertae sedis	Allantophomoides		plant_pathogen				leaf/fruit/seed_pathogen													#N/A	#N/A	#N/A	#N/A	#N/A	#N/A	#N/A	#N/A	#N/A	#N/A	#N/A	#N/A	#N/A	#N/A	#N/A	#N/A	#N/A	#N/A
OTU1035	Basidiomycota genus Incertae sedis	0.000842566	0	jrk00235	Ascomycota	Ascomycota class incertae sedis	Ascomycota order incertae sedis	Ascomycota family incertae sedis	Allophoron																			#N/A	#N/A	#N/A	#N/A	#N/A	#N/A	#N/A	#N/A	#N/A	#N/A	#N/A	#N/A	#N/A	#N/A	#N/A	#N/A	#N/A	#N/A
OTU1036	Basidiomycota genus Incertae sedis	0.000842566	0	jrk00240	Ascomycota	Ascomycota class incertae sedis	Ascomycota order incertae sedis	Ascomycota family incertae sedis	Allothyriella																			#N/A	#N/A	#N/A	#N/A	#N/A	#N/A	#N/A	#N/A	#N/A	#N/A	#N/A	#N/A	#N/A	#N/A	#N/A	#N/A	#N/A	#N/A
OTU1037	Basidiomycota genus Incertae sedis	0.000842566	0	jrk00241	Ascomycota	Ascomycota class incertae sedis	Ascomycota order incertae sedis	Ascomycota family incertae sedis	Allothyrina																			#N/A	#N/A	#N/A	#N/A	#N/A	#N/A	#N/A	#N/A	#N/A	#N/A	#N/A	#N/A	#N/A	#N/A	#N/A	#N/A	#N/A	#N/A
OTU1038	Basidiomycota genus Incertae sedis	0.000842566	0	jrk00242	Ascomycota	Ascomycota class incertae sedis	Ascomycota order incertae sedis	Ascomycota family incertae sedis	Allothyriopsis																			#N/A	#N/A	#N/A	#N/A	#N/A	#N/A	#N/A	#N/A	#N/A	#N/A	#N/A	#N/A	#N/A	#N/A	#N/A	#N/A	#N/A	#N/A
OTU1039	Basidiomycota genus Incertae sedis	0.000842566	0	jrk00246	Ascomycota	Ascomycota class incertae sedis	Ascomycota order incertae sedis	Ascomycota family incertae sedis	Alpakesa		litter_saprotroph					leaf/fruit/seed					filamentous_mycelium							#N/A	#N/A	#N/A	#N/A	#N/A	#N/A	#N/A	#N/A	#N/A	#N/A	#N/A	#N/A	#N/A	#N/A	#N/A	#N/A	#N/A	#N/A
OTU1040	Basidiomycota genus Incertae sedis	0.000842566	0	jrk00247	Ascomycota	Ascomycota class incertae sedis	Ascomycota order incertae sedis	Ascomycota family incertae sedis	Alpakesiopsis																			#N/A	#N/A	#N/A	#N/A	#N/A	#N/A	#N/A	#N/A	#N/A	#N/A	#N/A	#N/A	#N/A	#N/A	#N/A	#N/A	#N/A	#N/A
OTU1041	Basidiomycota genus Incertae sedis	0.000842566	0	jrk00255	Ascomycota	Ascomycota class incertae sedis	Ascomycota order incertae sedis	Ascomycota family incertae sedis	Alveariospora																			#N/A	#N/A	#N/A	#N/A	#N/A	#N/A	#N/A	#N/A	#N/A	#N/A	#N/A	#N/A	#N/A	#N/A	#N/A	#N/A	#N/A	#N/A
OTU1042	Basidiomycota genus Incertae sedis	0.000842566	0	jrk00257	Ascomycota	Ascomycota class incertae sedis	Ascomycota order incertae sedis	Ascomycota family incertae sedis	Alveophoma																			#N/A	#N/A	#N/A	#N/A	#N/A	#N/A	#N/A	#N/A	#N/A	#N/A	#N/A	#N/A	#N/A	#N/A	#N/A	#N/A	#N/A	#N/A
OTU1043	Basidiomycota genus Incertae sedis	0.000842566	0	jrk00259	Ascomycota	Ascomycota class incertae sedis	Ascomycota order incertae sedis	Ascomycota family incertae sedis	Alysidiopsis																			#N/A	#N/A	#N/A	#N/A	#N/A	#N/A	#N/A	#N/A	#N/A	#N/A	#N/A	#N/A	#N/A	#N/A	#N/A	#N/A	#N/A	#N/A
OTU1044	Basidiomycota genus Incertae sedis	0.000842566	0	jrk00262	Ascomycota	Ascomycota class incertae sedis	Ascomycota order incertae sedis	Ascomycota family incertae sedis	Amallospora																			#N/A	#N/A	#N/A	#N/A	#N/A	#N/A	#N/A	#N/A	#N/A	#N/A	#N/A	#N/A	#N/A	#N/A	#N/A	#N/A	#N/A	#N/A
OTU1045	Basidiomycota genus Incertae sedis	0.000842566	0	jrk00288	Ascomycota	Ascomycota class incertae sedis	Ascomycota order incertae sedis	Ascomycota family incertae sedis	Ameroconium		lichen_parasite	fungal_decomposer				fungal_material,algal_material		non-aquatic			filamentous_mycelium							#N/A	#N/A	#N/A	#N/A	#N/A	#N/A	#N/A	#N/A	#N/A	#N/A	#N/A	#N/A	#N/A	#N/A	#N/A	#N/A	#N/A	#N/A
OTU1046	Basidiomycota genus Incertae sedis	0.000842566	0	jrk00289	Ascomycota	Ascomycota class incertae sedis	Ascomycota order incertae sedis	Ascomycota family incertae sedis	Amerodiscosiella																			#N/A	#N/A	#N/A	#N/A	#N/A	#N/A	#N/A	#N/A	#N/A	#N/A	#N/A	#N/A	#N/A	#N/A	#N/A	#N/A	#N/A	#N/A
OTU1047	Basidiomycota genus Incertae sedis	0.000842566	0	jrk00290	Ascomycota	Ascomycota class incertae sedis	Ascomycota order incertae sedis	Ascomycota family incertae sedis	Amerodiscosiellina																			#N/A	#N/A	#N/A	#N/A	#N/A	#N/A	#N/A	#N/A	#N/A	#N/A	#N/A	#N/A	#N/A	#N/A	#N/A	#N/A	#N/A	#N/A
OTU1048	Basidiomycota genus Incertae sedis	0.000842566	0	jrk00292	Ascomycota	Ascomycota class incertae sedis	Ascomycota order incertae sedis	Ascomycota family incertae sedis	Amerosporiopsis																			#N/A	#N/A	#N/A	#N/A	#N/A	#N/A	#N/A	#N/A	#N/A	#N/A	#N/A	#N/A	#N/A	#N/A	#N/A	#N/A	#N/A	#N/A
OTU1049	Basidiomycota genus Incertae sedis	0.000842566	0	jrk00294	Ascomycota	Ascomycota class incertae sedis	Ascomycota order incertae sedis	Ascomycota family incertae sedis	Amerosympodula																			#N/A	#N/A	#N/A	#N/A	#N/A	#N/A	#N/A	#N/A	#N/A	#N/A	#N/A	#N/A	#N/A	#N/A	#N/A	#N/A	#N/A	#N/A
OTU1050	Basidiomycota genus Incertae sedis	0.000842566	0	jrk00304	Ascomycota	Ascomycota class incertae sedis	Ascomycota order incertae sedis	Ascomycota family incertae sedis	Amoenodochium																			#N/A	#N/A	#N/A	#N/A	#N/A	#N/A	#N/A	#N/A	#N/A	#N/A	#N/A	#N/A	#N/A	#N/A	#N/A	#N/A	#N/A	#N/A
OTU1051	Basidiomycota genus Incertae sedis	0.000842566	0	jrk00305	Ascomycota	Ascomycota class incertae sedis	Ascomycota order incertae sedis	Ascomycota family incertae sedis	Amoenomyces																			#N/A	#N/A	#N/A	#N/A	#N/A	#N/A	#N/A	#N/A	#N/A	#N/A	#N/A	#N/A	#N/A	#N/A	#N/A	#N/A	#N/A	#N/A
OTU1052	Basidiomycota genus Incertae sedis	0.000842566	0	jrk00315	Ascomycota	Ascomycota class incertae sedis	Ascomycota order incertae sedis	Ascomycota family incertae sedis	Amphichaetella																			#N/A	#N/A	#N/A	#N/A	#N/A	#N/A	#N/A	#N/A	#N/A	#N/A	#N/A	#N/A	#N/A	#N/A	#N/A	#N/A	#N/A	#N/A
OTU1053	Basidiomycota genus Incertae sedis	0.000842566	0	jrk00327	Ascomycota	Ascomycota class incertae sedis	Ascomycota order incertae sedis	Ascomycota family incertae sedis	Amphophialis																			#N/A	#N/A	#N/A	#N/A	#N/A	#N/A	#N/A	#N/A	#N/A	#N/A	#N/A	#N/A	#N/A	#N/A	#N/A	#N/A	#N/A	#N/A
OTU1054	Basidiomycota genus Incertae sedis	0.000842566	0	jrk00328	Ascomycota	Ascomycota class incertae sedis	Ascomycota order incertae sedis	Ascomycota family incertae sedis	Amphoropycnium																			#N/A	#N/A	#N/A	#N/A	#N/A	#N/A	#N/A	#N/A	#N/A	#N/A	#N/A	#N/A	#N/A	#N/A	#N/A	#N/A	#N/A	#N/A
OTU1055	Basidiomycota genus Incertae sedis	0.000842566	0	jrk00333	Ascomycota	Ascomycota class incertae sedis	Ascomycota order incertae sedis	Ascomycota family incertae sedis	Ampullicephala																			#N/A	#N/A	#N/A	#N/A	#N/A	#N/A	#N/A	#N/A	#N/A	#N/A	#N/A	#N/A	#N/A	#N/A	#N/A	#N/A	#N/A	#N/A
OTU1056	Basidiomycota genus Incertae sedis	0.000842566	0	jrk00335	Ascomycota	Ascomycota class incertae sedis	Ascomycota order incertae sedis	Ascomycota family incertae sedis	Ampulliferina																			#N/A	#N/A	#N/A	#N/A	#N/A	#N/A	#N/A	#N/A	#N/A	#N/A	#N/A	#N/A	#N/A	#N/A	#N/A	#N/A	#N/A	#N/A
OTU1057	Basidiomycota genus Incertae sedis	0.000842566	0	jrk00361	Ascomycota	Ascomycota class incertae sedis	Ascomycota order incertae sedis	Ascomycota family incertae sedis	Anabahusakala																			#N/A	#N/A	#N/A	#N/A	#N/A	#N/A	#N/A	#N/A	#N/A	#N/A	#N/A	#N/A	#N/A	#N/A	#N/A	#N/A	#N/A	#N/A
OTU1058	Vishniacozyma	0.000842566	0	jrk00363	Ascomycota	Ascomycota class incertae sedis	Ascomycota order incertae sedis	Ascomycota family incertae sedis	Anacraspedodidymum																			0	soil_saprotroph	0	extremophile	0	0	soil	0	non-aquatic	0	0	yeast	0	0	0	0	0	0
OTU1059	Basidiomycota genus Incertae sedis	0.000842566	0	jrk00364	Ascomycota	Ascomycota class incertae sedis	Ascomycota order incertae sedis	Ascomycota family incertae sedis	Anaexserticlava																			#N/A	#N/A	#N/A	#N/A	#N/A	#N/A	#N/A	#N/A	#N/A	#N/A	#N/A	#N/A	#N/A	#N/A	#N/A	#N/A	#N/A	#N/A
OTU1060	Basidiomycota genus Incertae sedis	0.000842566	0	jrk00366	Ascomycota	Ascomycota class incertae sedis	Ascomycota order incertae sedis	Ascomycota family incertae sedis	Anaphysmene																			#N/A	#N/A	#N/A	#N/A	#N/A	#N/A	#N/A	#N/A	#N/A	#N/A	#N/A	#N/A	#N/A	#N/A	#N/A	#N/A	#N/A	#N/A
OTU1061	Basidiomycota genus Incertae sedis	0.000842566	0	jrk00369	Ascomycota	Ascomycota class incertae sedis	Ascomycota order incertae sedis	Ascomycota family incertae sedis	Anarhyma																			#N/A	#N/A	#N/A	#N/A	#N/A	#N/A	#N/A	#N/A	#N/A	#N/A	#N/A	#N/A	#N/A	#N/A	#N/A	#N/A	#N/A	#N/A
OTU1062	Basidiomycota genus Incertae sedis	0.000842566	0	jrk00371	Ascomycota	Ascomycota class incertae sedis	Ascomycota order incertae sedis	Ascomycota family incertae sedis	Anaselenosporella																			#N/A	#N/A	#N/A	#N/A	#N/A	#N/A	#N/A	#N/A	#N/A	#N/A	#N/A	#N/A	#N/A	#N/A	#N/A	#N/A	#N/A	#N/A
OTU1063	Amorphotheca	0.000842566	0	jrk00372	Ascomycota	Ascomycota class incertae sedis	Ascomycota order incertae sedis	Ascomycota family incertae sedis	Anaseptoidium																			#N/A	#N/A	#N/A	#N/A	#N/A	#N/A	#N/A	#N/A	#N/A	#N/A	#N/A	#N/A	#N/A	#N/A	#N/A	#N/A	#N/A	#N/A
OTU1064	Devriesia	0	0.00164818	jrk00375	Ascomycota	Ascomycota class incertae sedis	Ascomycota order incertae sedis	Ascomycota family incertae sedis	Anaverticicladus																			0	plant_pathogen	litter_saprotroph	0	0	leaf/fruit/seed_pathogen	leaf/fruit/seed	0	non-aquatic	0	0	filamentous_mycelium	perithecium_(hymenium_hidden,_narrow_opening)	closed	0	0	0	0
OTU1065	Backusella	0	0.00164818	jrk00377	Ascomycota	Ascomycota class incertae sedis	Ascomycota order incertae sedis	Ascomycota family incertae sedis	Ancoraspora																			0	soil_saprotroph	dung_saprotroph	0	0	0	soil,dung	mold	non-aquatic	0	0	filamentous_mycelium	none	none	0	0	0	0
OTU1066		0.000842566	0	jrk00378	Ascomycota	Ascomycota class incertae sedis	Ascomycota order incertae sedis	Ascomycota family incertae sedis	Ancorasporella																			#N/A	#N/A	#N/A	#N/A	#N/A	#N/A	#N/A	#N/A	#N/A	#N/A	#N/A	#N/A	#N/A	#N/A	#N/A	#N/A	#N/A	#N/A
OTU1067		0.000842566	0	jrk00388	Ascomycota	Ascomycota class incertae sedis	Ascomycota order incertae sedis	Ascomycota family incertae sedis	Angiopomopsis																			#N/A	#N/A	#N/A	#N/A	#N/A	#N/A	#N/A	#N/A	#N/A	#N/A	#N/A	#N/A	#N/A	#N/A	#N/A	#N/A	#N/A	#N/A
OTU1068	Rozellomycota genus Incertae sedis	0	0.00164818	jrk00391	Ascomycota	Ascomycota class incertae sedis	Ascomycota order incertae sedis	Ascomycota family incertae sedis	Angulimaya		unspecified_saprotroph																	#N/A	#N/A	#N/A	#N/A	#N/A	#N/A	#N/A	#N/A	#N/A	#N/A	#N/A	#N/A	#N/A	#N/A	#N/A	#N/A	#N/A	#N/A
OTU1069	Dioszegia	0	0.00164818	jrk00393	Ascomycota	Ascomycota class incertae sedis	Ascomycota order incertae sedis	Ascomycota family incertae sedis	Angulospora		litter_saprotroph					leaf/fruit/seed		freshwater			filamentous_mycelium							0	litter_saprotroph	0	0	0	0	leaf/fruit/seed	0	non-aquatic	0	0	yeast	0	0	0	0	0	0
OTU1070	Ascomycota genus Incertae sedis	0.000842566	0	jrk00403	Ascomycota	Ascomycota class incertae sedis	Ascomycota order incertae sedis	Ascomycota family incertae sedis	Annellodentimyces																			#N/A	#N/A	#N/A	#N/A	#N/A	#N/A	#N/A	#N/A	#N/A	#N/A	#N/A	#N/A	#N/A	#N/A	#N/A	#N/A	#N/A	#N/A
OTU1071	Ascomycota genus Incertae sedis	0.000842566	0	jrk00404	Ascomycota	Ascomycota class incertae sedis	Ascomycota order incertae sedis	Ascomycota family incertae sedis	Annellodochium																			#N/A	#N/A	#N/A	#N/A	#N/A	#N/A	#N/A	#N/A	#N/A	#N/A	#N/A	#N/A	#N/A	#N/A	#N/A	#N/A	#N/A	#N/A
OTU1072	Mucoraceae genus Incertae sedis	0	0.00164818	jrk00407	Ascomycota	Ascomycota class incertae sedis	Ascomycota order incertae sedis	Ascomycota family incertae sedis	Annellophorella																			#N/A	#N/A	#N/A	#N/A	#N/A	#N/A	#N/A	#N/A	#N/A	#N/A	#N/A	#N/A	#N/A	#N/A	#N/A	#N/A	#N/A	#N/A
OTU1073	Ascomycota genus Incertae sedis	0.000842566	0	jrk00409	Ascomycota	Ascomycota class incertae sedis	Ascomycota order incertae sedis	Ascomycota family incertae sedis	Annellospermosporella																			#N/A	#N/A	#N/A	#N/A	#N/A	#N/A	#N/A	#N/A	#N/A	#N/A	#N/A	#N/A	#N/A	#N/A	#N/A	#N/A	#N/A	#N/A
OTU1074		0.000842566	0	jrk00429	Ascomycota	Ascomycota class incertae sedis	Ascomycota order incertae sedis	Ascomycota family incertae sedis	Antennatula		unspecified_pathotroph																	#N/A	#N/A	#N/A	#N/A	#N/A	#N/A	#N/A	#N/A	#N/A	#N/A	#N/A	#N/A	#N/A	#N/A	#N/A	#N/A	#N/A	#N/A
OTU1075	Mortierellales genus Incertae sedis	0	0.00164818	jrk00448	Ascomycota	Ascomycota class incertae sedis	Ascomycota order incertae sedis	Ascomycota family incertae sedis	Anthracoderma																			#N/A	#N/A	#N/A	#N/A	#N/A	#N/A	#N/A	#N/A	#N/A	#N/A	#N/A	#N/A	#N/A	#N/A	#N/A	#N/A	#N/A	#N/A
OTU1076	Pilidium	0	0.00164818	jrk00452	Ascomycota	Ascomycota class incertae sedis	Ascomycota order incertae sedis	Ascomycota family incertae sedis	Antimanoa																			0	plant_pathogen	0	0	0	leaf/fruit/seed_pathogen	0	0	non-aquatic	0	0	filamentous_mycelium	apothecium_(hymenium_on_surface)	smooth	0	0	0	0
OTU1077	Fungi genus Incertae sedis	0	0.00164818	jrk00459	Ascomycota	Ascomycota class incertae sedis	Ascomycota order incertae sedis	Ascomycota family incertae sedis	Antromyces																			#N/A	#N/A	#N/A	#N/A	#N/A	#N/A	#N/A	#N/A	#N/A	#N/A	#N/A	#N/A	#N/A	#N/A	#N/A	#N/A	#N/A	#N/A
OTU1078	GS18 genus Incertae sedis	0	0.00164818	jrk00461	Ascomycota	Ascomycota class incertae sedis	Ascomycota order incertae sedis	Ascomycota family incertae sedis	Anulohypha																			#N/A	#N/A	#N/A	#N/A	#N/A	#N/A	#N/A	#N/A	#N/A	#N/A	#N/A	#N/A	#N/A	#N/A	#N/A	#N/A	#N/A	#N/A
OTU1079	Pezizomycotina genus Incertae sedis	0	0.00164818	jrk00464	Ascomycota	Ascomycota class incertae sedis	Ascomycota order incertae sedis	Ascomycota family incertae sedis	Aoria																			#N/A	#N/A	#N/A	#N/A	#N/A	#N/A	#N/A	#N/A	#N/A	#N/A	#N/A	#N/A	#N/A	#N/A	#N/A	#N/A	#N/A	#N/A
				jrk00475	Ascomycota	Ascomycota class incertae sedis	Ascomycota order incertae sedis	Ascomycota family incertae sedis	Aphanofalx
				jrk00503	Ascomycota	Ascomycota class incertae sedis	Ascomycota order incertae sedis	Ascomycota family incertae sedis	Apiotypa
				jrk00512	Ascomycota	Ascomycota class incertae sedis	Ascomycota order incertae sedis	Ascomycota family incertae sedis	Apogloeum
				jrk00514	Ascomycota	Ascomycota class incertae sedis	Ascomycota order incertae sedis	Ascomycota family incertae sedis	Apomelasmia
				jrk00516	Ascomycota	Ascomycota class incertae sedis	Ascomycota order incertae sedis	Ascomycota family incertae sedis	Aporellula
				jrk00521	Ascomycota	Ascomycota class incertae sedis	Ascomycota order incertae sedis	Ascomycota family incertae sedis	Aposporella		animal_parasite	animal_decomposer				animal_material			animal_parasite
				jrk00522	Ascomycota	Ascomycota class incertae sedis	Ascomycota order incertae sedis	Ascomycota family incertae sedis	Apostrasseria		unspecified_saprotroph
				jrk00555	Ascomycota	Ascomycota class incertae sedis	Ascomycota order incertae sedis	Ascomycota family incertae sedis	Arachnophora
				jrk00557	Ascomycota	Ascomycota class incertae sedis	Ascomycota order incertae sedis	Ascomycota family incertae sedis	Arachnospora
				jrk00564	Ascomycota	Ascomycota class incertae sedis	Ascomycota order incertae sedis	Ascomycota family incertae sedis	Arborillus		lichen_parasite	fungal_decomposer				fungal_material,algal_material		non-aquatic
				jrk00565	Ascomycota	Ascomycota class incertae sedis	Ascomycota order incertae sedis	Ascomycota family incertae sedis	Arborispora
				jrk00577	Ascomycota	Ascomycota class incertae sedis	Ascomycota order incertae sedis	Ascomycota family incertae sedis	Ardhachandra
				jrk00584	Ascomycota	Ascomycota class incertae sedis	Ascomycota order incertae sedis	Ascomycota family incertae sedis	Argentinomyces
				jrk00618	Ascomycota	Ascomycota class incertae sedis	Ascomycota order incertae sedis	Ascomycota family incertae sedis	Arthromoniliphora
				jrk00622	Ascomycota	Ascomycota class incertae sedis	Ascomycota order incertae sedis	Ascomycota family incertae sedis	Arthropycnis
				jrk00627	Ascomycota	Ascomycota class incertae sedis	Ascomycota order incertae sedis	Ascomycota family incertae sedis	Arthrowallemia
				jrk00631	Ascomycota	Ascomycota class incertae sedis	Ascomycota order incertae sedis	Ascomycota family incertae sedis	Articulophora
				jrk00651	Ascomycota	Ascomycota class incertae sedis	Ascomycota order incertae sedis	Ascomycota family incertae sedis	Ascochytopsis
				jrk00652	Ascomycota	Ascomycota class incertae sedis	Ascomycota order incertae sedis	Ascomycota family incertae sedis	Ascochytulina
				jrk00663	Ascomycota	Ascomycota class incertae sedis	Ascomycota order incertae sedis	Ascomycota family incertae sedis	Ascofascicula
				jrk00668	Ascomycota	Ascomycota class incertae sedis	Ascomycota order incertae sedis	Ascomycota family incertae sedis	Ascomauritiana									partly_freshwater_(partly_non-aquatic)
				jrk00680	Ascomycota	Ascomycota class incertae sedis	Ascomycota order incertae sedis	Ascomycota family incertae sedis	Ascosubramania		unspecified_saprotroph
				jrk00690	Ascomycota	Ascomycota class incertae sedis	Ascomycota order incertae sedis	Ascomycota family incertae sedis	Ashtaangam
				jrk00698	Ascomycota	Ascomycota class incertae sedis	Ascomycota order incertae sedis	Ascomycota family incertae sedis	Aspilaima
				jrk00702	Ascomycota	Ascomycota class incertae sedis	Ascomycota order incertae sedis	Ascomycota family incertae sedis	Astelechia
				jrk00706	Ascomycota	Ascomycota class incertae sedis	Ascomycota order incertae sedis	Ascomycota family incertae sedis	Asterinothyriella
				jrk00707	Ascomycota	Ascomycota class incertae sedis	Ascomycota order incertae sedis	Ascomycota family incertae sedis	Asterinothyrium
				jrk00709	Ascomycota	Ascomycota class incertae sedis	Ascomycota order incertae sedis	Ascomycota family incertae sedis	Asteroconium
				jrk00713	Ascomycota	Ascomycota class incertae sedis	Ascomycota order incertae sedis	Ascomycota family incertae sedis	Asteroglobulus		lichen_parasite	fungal_decomposer				fungal_material,algal_material		non-aquatic				none	none
				jrk00723	Ascomycota	Ascomycota class incertae sedis	Ascomycota order incertae sedis	Ascomycota family incertae sedis	Asterophoma		unspecified_saprotroph
				jrk00726	Ascomycota	Ascomycota class incertae sedis	Ascomycota order incertae sedis	Ascomycota family incertae sedis	Asteroscutula
				jrk00728	Ascomycota	Ascomycota class incertae sedis	Ascomycota order incertae sedis	Ascomycota family incertae sedis	Asterostomopora
				jrk00729	Ascomycota	Ascomycota class incertae sedis	Ascomycota order incertae sedis	Ascomycota family incertae sedis	Asterostomopsis
				jrk00730	Ascomycota	Ascomycota class incertae sedis	Ascomycota order incertae sedis	Ascomycota family incertae sedis	Asterostomula
				jrk00731	Ascomycota	Ascomycota class incertae sedis	Ascomycota order incertae sedis	Ascomycota family incertae sedis	Asterostomulina
				jrk00735	Ascomycota	Ascomycota class incertae sedis	Ascomycota order incertae sedis	Ascomycota family incertae sedis	Astomella
				jrk00740	Ascomycota	Ascomycota class incertae sedis	Ascomycota order incertae sedis	Ascomycota family incertae sedis	Astronatelia
				jrk00763	Ascomycota	Ascomycota class incertae sedis	Ascomycota order incertae sedis	Ascomycota family incertae sedis	Atractilina
				jrk00765	Ascomycota	Ascomycota class incertae sedis	Ascomycota order incertae sedis	Ascomycota family incertae sedis	Atractobolus
				jrk00778	Ascomycota	Ascomycota class incertae sedis	Ascomycota order incertae sedis	Ascomycota family incertae sedis	Atrosetaphiale
				jrk00779	Ascomycota	Ascomycota class incertae sedis	Ascomycota order incertae sedis	Ascomycota family incertae sedis	Atrosynnema
				jrk00810	Ascomycota	Ascomycota class incertae sedis	Ascomycota order incertae sedis	Ascomycota family incertae sedis	Aurosphaeria
				jrk00849	Ascomycota	Ascomycota class incertae sedis	Ascomycota order incertae sedis	Ascomycota family incertae sedis	Avesicladiella
				jrk00850	Ascomycota	Ascomycota class incertae sedis	Ascomycota order incertae sedis	Ascomycota family incertae sedis	Avettaea		unspecified_saprotroph
				jrk00858	Ascomycota	Ascomycota class incertae sedis	Ascomycota order incertae sedis	Ascomycota family incertae sedis	Bacillopeltis
				jrk00860	Ascomycota	Ascomycota class incertae sedis	Ascomycota order incertae sedis	Ascomycota family incertae sedis	Bactridium
				jrk00862	Ascomycota	Ascomycota class incertae sedis	Ascomycota order incertae sedis	Ascomycota family incertae sedis	Bactrodesmiella
				jrk00869	Ascomycota	Ascomycota class incertae sedis	Ascomycota order incertae sedis	Ascomycota family incertae sedis	Baculospora
				jrk00871	Ascomycota	Ascomycota class incertae sedis	Ascomycota order incertae sedis	Ascomycota family incertae sedis	Badarisama
				jrk00885	Ascomycota	Ascomycota class incertae sedis	Ascomycota order incertae sedis	Ascomycota family incertae sedis	Bahuchashaka
				jrk00886	Ascomycota	Ascomycota class incertae sedis	Ascomycota order incertae sedis	Ascomycota family incertae sedis	Bahugada
				jrk00887	Ascomycota	Ascomycota class incertae sedis	Ascomycota order incertae sedis	Ascomycota family incertae sedis	Bahukalasa
				jrk00892	Ascomycota	Ascomycota class incertae sedis	Ascomycota order incertae sedis	Ascomycota family incertae sedis	Balaniopsis
				jrk00893	Ascomycota	Ascomycota class incertae sedis	Ascomycota order incertae sedis	Ascomycota family incertae sedis	Balanium
				jrk00916	Ascomycota	Ascomycota class incertae sedis	Ascomycota order incertae sedis	Ascomycota family incertae sedis	Barbarosporina
				jrk00921	Ascomycota	Ascomycota class incertae sedis	Ascomycota order incertae sedis	Ascomycota family incertae sedis	Barnettella
				jrk00935	Ascomycota	Ascomycota class incertae sedis	Ascomycota order incertae sedis	Ascomycota family incertae sedis	Basauxia
				jrk00949	Ascomycota	Ascomycota class incertae sedis	Ascomycota order incertae sedis	Ascomycota family incertae sedis	Batistina
				jrk00952	Ascomycota	Ascomycota class incertae sedis	Ascomycota order incertae sedis	Ascomycota family incertae sedis	Batistospora
[truncated: 9,633 more rows]
