# Supplementary material for: Extremotolerant Fungi in Resinous Soils: A Unique Diversity of Generalist and Specialized Hydrocarbon Degraders
Source: Research Square preprint supplement (doi:10.21203/rs.3.rs-8530099/v1), 2026-02-10
Supplement: Supplementary file 7 [file a76f471a91ca502d508fdc8e.xlsx]

## Sheet: Table_S8
OTUs	Type|Abund	RS.I	RS.II	RS.III	Accession Number	SH	E value	Max score	Total score	Query from	Query to	Hit from	Hit to	Identity	Positive	Similarity[%]	Coverage[%]	Query length	kingdom	phylum	class	order	family	genus	species
OTU001	MOSTABUND|n=28641/16981	9480	7206	11955	MT872624	SH0912804.10FU	7.73175e-044	180.245	97	1	150	578	729	134	134	89.3	100	150	k__Fungi	p__Ascomycota	c__Eurotiomycetes	o__Eurotiomycetes_ord_Incertae_sedis	f__Eurotiomycetes_fam_Incertae_sedis	g__Eurotiomycetes_gen_Incertae_sedis	s__Eurotiomycetes_sp
OTU002	MOSTABUND|n=14618/7716	4012	3376	7230	PP115452	SH0911881.10FU	3.83567e-108	394.457	213	1	213	308	520	213	213	100	100	213	k__Fungi	p__Basidiomycota	c__Microbotryomycetes	o__Sporidiobolales	f__Sporidiobolaceae	g__Sporobolomyces	s__Sporobolomyces_salmonicolor
OTU003	MOSTABUND|n=8385/4699	2530	3245	2610	EU030275	SH0828639.10FU	8.19364e-074	279.964	151	1	160	334	493	157	157	98.1	98.2	163	k__Fungi	p__Ascomycota	c__Eurotiomycetes	o__Chaetothyriales	f__Herpotrichiellaceae	g__Sorocybe	s__Sorocybe_resinae
OTU004	MOSTABUND|n=6149/2796	2526	1295	2328	MN071391	SH1043354.10FU	3.99291e-113	411.077	222	1	222	297	518	222	222	100	100	222	k__Fungi	p__Fungi_phy_Incertae_sedis	c__Fungi_cls_Incertae_sedis	o__Fungi_ord_Incertae_sedis	f__Fungi_fam_Incertae_sedis	g__Fungi_gen_Incertae_sedis	s__Fungi_sp
OTU005	MOSTABUND|n=5419/2646	2090	1136	2193	MW710094	SH0733979.10FU	2.52731e-120	435.083	235	1	235	324	558	235	235	100	100	235	k__Fungi	p__Basidiomycota	c__Microbotryomycetes	o__Microbotryomycetes_ord_Incertae_sedis	f__Colacogloeaceae	g__Colacogloea	s__Colacogloea_philyla
OTU006	MOSTABUND|n=5407/3049	1207	370	3830	FJ235127	SH0892767.10FU	1.25628e-097	359.37	194	1	194	407	600	194	194	100	100	194	k__Fungi	p__Ascomycota	c__Saccharomycetes	o__Saccharomycetales	f__Saccharomycetales_fam_Incertae_sedis	g__Candida	s__Candida_keroseneae
OTU007	MOSTABUND|n=4550/2512	1352	1049	2149	OR069551	SH0767731.10FU	1.74869e-080	302.124	163	1	163	331	493	163	163	100	100	163	k__Fungi	p__Ascomycota	c__Eurotiomycetes	o__Eurotiales	f__Aspergillaceae	g__Penicillium	s__Penicillium_corylophilum
OTU008	MOSTABUND|n=4518/1402	1614	1114	1790	MH188916	SH0926074.10FU	4.26975e-118	427.696	231	1	237	347	584	236	236	99.6	100	237	k__Fungi	p__Basidiomycota	c__Exobasidiomycetes	o__Exobasidiales	f__Exobasidiales_fam_Incertae_sedis	g__Guomyces	s__Guomyces_nicotianae
OTU009	MOSTABUND|n=4321/2419	1511	971	1839	OR905858	SH0887078.10FU	4.49133e-097	357.524	193	1	193	394	586	193	193	100	100	193	k__Fungi	p__Ascomycota	c__Saccharomycetes	o__Saccharomycetales	f__Debaryomycetaceae	g__Debaryomyces	s__Debaryomyces_hansenii
OTU010	MOSTABUND|n=3686/1780	1237	855	1594	MT813950	SH0950131.10FU	4.78626e-071	270.731	146	1	156	217	371	153	153	98.1	98.1	159	k__Fungi	p__Ascomycota	c__Xylonomycetes	o__Symbiotaphrinales	f__Symbiotaphrinaceae	g__Symbiotaphrina	s__Symbiotaphrina_microtheca
OTU011	MOSTABUND|n=2501/768	893	455	1153	UDB03608770	SH1012176.10FU	5.48785e-070	267.038	144	1	144	317	460	144	144	100	100	144	k__Fungi	p__Ascomycota	c__Leotiomycetes	o__Helotiales	f__Helotiales_fam_Incertae_sedis	g__Infundichalara	s__Infundichalara_sp
OTU012	MOSTABUND|n=2432/1083	795	567	1070	MT872624	SH0912804.10FU	4.53245e-071	270.731	146	1	152	578	729	150	150	98.7	100	152	k__Fungi	p__Ascomycota	c__Eurotiomycetes	o__Eurotiomycetes_ord_Incertae_sedis	f__Eurotiomycetes_fam_Incertae_sedis	g__Eurotiomycetes_gen_Incertae_sedis	s__Eurotiomycetes_sp
OTU013	MOSTABUND|n=2232/332	808	603	821	GU062229	SH0926075.10FU	7.69423e-131	470.169	254	1	254	308	561	254	254	100	98.4	258	k__Fungi	p__Basidiomycota	c__Basidiomycota_cls_Incertae_sedis	o__Basidiomycota_ord_Incertae_sedis	f__Basidiomycota_fam_Incertae_sedis	g__Basidiomycota_gen_Incertae_sedis	s__Basidiomycota_sp
OTU014	MOSTABUND|n=2124/1207	491	825	808
OTU015	MOSTABUND|n=2002/404	695	508	799	OR387067	SH0974819.10FU	3.0608e-109	398.15	215	1	219	363	580	218	218	99.5	100	219	k__Fungi	p__Ascomycota	c__Eurotiomycetes	o__Chaetothyriales	f__Herpotrichiellaceae	g__Exophiala	s__Exophiala_dermatitidis
OTU016	MOSTABUND|n=1940/929	729	524	687	KT265804	SH0733984.10FU	1.95814e-116	422.156	228	1	232	883	1113	231	231	99.6	99.1	234	k__Fungi	p__Basidiomycota	c__Microbotryomycetes	o__Sporidiobolales	f__Sporidiobolaceae	g__Rhodotorula	s__Rhodotorula_sp
OTU017	MOSTABUND|n=1660/860	681	353	626	OR793058	SH0767731.10FU	7.95641e-079	296.584	160	1	160	362	521	160	160	100	100	160	k__Fungi	p__Ascomycota	c__Eurotiomycetes	o__Eurotiales	f__Aspergillaceae	g__Penicillium	s__Penicillium_fundyense
OTU018	MOSTABUND|n=1386/812	508	279	599	OQ383503	SH0966706.10FU	9.50805e-073	276.271	149	1	149	312	460	149	149	100	100	149	k__Fungi	p__Ascomycota	c__Leotiomycetes	o__Leotiales	f__Tympanidaceae	g__Pragmopora	s__Pragmopora_sp
OTU019	MOSTABUND|n=924/317	510	151	263	OM337540	SH0924980.10FU	2.77361e-073	278.118	150	1	153	470	622	152	152	99.3	98.7	155	k__Fungi	p__Ascomycota	c__Dothideomycetes	o__Mytilinidiales	f__Mytilinidiaceae	g__Lophium	s__Lophium_mytilinum
OTU020	MOSTABUND|n=917/542	298	262	357	OM337573	SH0849718.10FU	1.77406e-075	285.504	154	1	164	538	700	161	161	98.2	100	164	k__Fungi	p__Ascomycota	c__Dothideomycetes	o__Mytilinidiales	f__Mytilinidiaceae	g__Mytilinidion	s__Mytilinidion_resinicola
OTU021	MOSTABUND|n=883/294	213	129	541	MT809296	SH0737869.10FU	2.09388e-074	281.811	152	1	152	352	503	152	152	100	100	152	k__Fungi	p__Ascomycota	c__Sareomycetes	o__Sareales	f__Sareaceae	g__Sarea	s__Sarea_sp
OTU022	MOSTABUND|n=863/463	327	196	340	MK782435	SH0905449.10FU	1.3717e-081	305.817	165	1	165	771	935	165	165	100	100	165	k__Fungi	p__Ascomycota	c__Leotiomycetes	o__Helotiales	f__Mollisiaceae	g__Phialocephala	s__Phialocephala_fluminis
OTU023	MOSTABUND|n=792/517	258	170	364	EF434047	SH0868844.10FU	1.05174e-067	259.651	140	1	161	433	593	154	154	95.7	100	161	k__Fungi	p__Ascomycota	c__Dothideomycetes	o__Dothideomycetes_ord_Incertae_sedis	f__Dothideomycetes_fam_Incertae_sedis	g__Dothideomycetes_gen_Incertae_sedis	s__Dothideomycetes_sp
OTU024	MOSTABUND|n=731/431	445	126	160	OM980413	SH0862656.10FU	4.60542e-017	91.6061	49	36	137	382	485	88	88	86.3	57	179	k__Fungi	p__Basidiomycota	c__Microbotryomycetes	o__Microbotryomycetes_ord_Incertae_sedis	f__Microbotryomycetes_fam_Incertae_sedis	g__Yunzhangia	s__Yunzhangia_sp
OTU025	MOSTABUND|n=659/399	45	36	578	OP856539	SH0970687.10FU	3.60778e-058	228.258	123	1	173	361	535	158	158	91.3	91.1	190	k__Fungi	p__Ascomycota	c__Sordariomycetes	o__Microascales	f__Microascaceae	g__Scedosporium	s__Scedosporium_sp
OTU026	MOSTABUND|n=487/241	236	92	159	OQ718080	SH0738016.10FU	1.27027e-071	272.578	147	1	153	373	525	151	151	98.7	100	153	k__Fungi	p__Ascomycota	c__Sareomycetes	o__Sareales	f__Sareaceae	g__Sarea	s__Sarea_coeloplata
OTU027	MOSTABUND|n=468/209	249	69	150	OR752067	SH0940075.10FU	1.3717e-081	305.817	165	1	165	364	528	165	165	100	100	165	k__Fungi	p__Ascomycota	c__Eurotiomycetes	o__Eurotiales	f__Aspergillaceae	g__Aspergillus	s__Aspergillus_fumigatus
OTU028	MOSTABUND|n=446/265	121	147	178	UDB02025080	SH0950063.10FU	3.25834e-052	207.945	112	1	130	309	439	125	125	96.2	92.9	140	k__Fungi	p__Ascomycota	c__Dothideomycetes	o__Mycosphaerellales	f__Neodevriesiaceae	g__Neodevriesiaceae_gen_Incertae_sedis	s__Neodevriesiaceae_sp
OTU029	MOSTABUND|n=399/177	140	78	181	LC639279	SH0946103.10FU	8.86916e-068	259.651	140	1	140	370	509	140	140	100	100	140	k__Fungi	p__Ascomycota	c__Leotiomycetes	o__Helotiales	f__Myxotrichaceae	g__Oidiodendron	s__Oidiodendron_griseum
OTU030	MOSTABUND|n=396/202	102	169	125	LC272919	SH0915560.10FU	1.76057e-070	268.884	145	1	162	362	525	158	158	97.5	100	162	k__Fungi	p__Ascomycota	c__Dothideomycetes	o__Myriangiales	f__Myriangiales_fam_Incertae_sedis	g__Myriangiales_gen_Incertae_sedis	s__Myriangiales_sp
OTU031	MOSTABUND|n=395/208	99	86	210	LC646545	SH0946018.10FU	8.86916e-068	259.651	140	1	140	344	483	140	140	100	100	140	k__Fungi	p__Ascomycota	c__Leotiomycetes	o__Helotiales	f__Amorphothecaceae	g__Amorphotheca	s__Amorphotheca_resinae
OTU032	MOSTABUND|n=378/212	122	135	121	KY105956	SH0892770.10FU	4.27798e-092	340.904	184	1	184	467	650	184	184	100	100	184	k__Fungi	p__Ascomycota	c__Saccharomycetes	o__Saccharomycetales	f__Debaryomycetaceae	g__Yamadazyma	s__Yamadazyma_tumulicola
OTU033	MOSTABUND|n=372/194	127	98	147	UDB01441599	SH0878054.10FU	1.07576e-082	309.511	167	1	167	343	509	167	167	100	100	167	k__Fungi	p__Ascomycota	c__Eurotiomycetes	o__Eurotiales	f__Aspergillaceae	g__Aspergillus	s__Aspergillus_sp
OTU034	MOSTABUND|n=339/131	141	72	126	KU580845	SH1015287.10FU	2.55325e-068	261.498	141	1	144	358	502	144	144	100	100	144	k__Fungi	p__Fungi_phy_Incertae_sedis	c__Fungi_cls_Incertae_sedis	o__Fungi_ord_Incertae_sedis	f__Fungi_fam_Incertae_sedis	g__Fungi_gen_Incertae_sedis	s__Fungi_sp
OTU035	MOSTABUND|n=300/162	116	70	114
OTU036	MOSTABUND|n=295/114	104	72	119	PP034030	SH0940222.10FU	1.07576e-082	309.511	167	1	167	250	416	167	167	100	100	167	k__Fungi	p__Ascomycota	c__Eurotiomycetes	o__Eurotiales	f__Aspergillaceae	g__Penicillium	s__Penicillium_roseopurpureum
OTU037	MOSTABUND|n=292/106	103	68	121	UDB01965427	SH0904668.10FU	9.33834e-074	279.964	151	1	182	350	530	173	173	95.1	100	182	k__Fungi	p__Ascomycota	c__Eurotiomycetes	o__Chaetothyriales	f__Herpotrichiellaceae	g__Exophiala	s__Exophiala_sp
OTU038	MOSTABUND|n=278/141	98	55	125	MZ314474	SH0743871.10FU	2.84012e-078	294.738	159	1	159	256	414	159	159	100	100	159	k__Fungi	p__Basidiomycota	c__Tremellomycetes	o__Tremellales	f__Naemateliaceae	g__Naematelia	s__Naematelia_encephala
OTU039	MOSTABUND|n=269/138	91	58	120	HG937089	SH0964646.10FU	1.36369e-092	342.75	185	1	207	363	567	200	200	96.6	100	207	k__Fungi	p__Basidiomycota	c__Basidiomycota_cls_Incertae_sedis	o__Basidiomycota_ord_Incertae_sedis	f__Basidiomycota_fam_Incertae_sedis	g__Basidiomycota_gen_Incertae_sedis	s__Basidiomycota_sp
OTU040	MOSTABUND|n=233/127	87	61	85	MH864711	SH0821638.10FU	2.09388e-074	281.811	152	1	152	414	565	152	152	100	100	152	k__Fungi	p__Ascomycota	c__Dothideomycetes	o__Pleosporales	f__Phaeosphaeriaceae	g__Paraphoma	s__Paraphoma_fimeti
OTU041	MOSTABUND|n=226/44	35	37	154	UDB05269281	SH0868848.10FU	1.40152e-081	305.817	165	1	168	393	560	167	167	99.4	100	168	k__Fungi	p__Ascomycota	c__Dothideomycetes	o__Dothideomycetes_ord_Incertae_sedis	f__Dothideomycetes_fam_Incertae_sedis	g__Dothideomycetes_gen_Incertae_sedis	s__Dothideomycetes_sp
OTU042	MOSTABUND|n=222/138	80	50	92
OTU043	MOSTABUND|n=210/3	81	34	95	UDB07674985	SH1012176.10FU	1.18791e-066	255.958	138	1	144	315	458	142	142	98.6	100	144	k__Fungi	p__Ascomycota	c__Leotiomycetes	o__Helotiales	f__Pezizellaceae	g__Ciliolarina	s__Ciliolarina_sp
OTU044	MOSTABUND|n=201/82	72	50	79	KC785575	SH0934675.10FU	2.87382e-104	381.53	206	1	206	348	553	206	206	100	100	206	k__Fungi	p__Basidiomycota	c__Exobasidiomycetes	o__Exobasidiales	f__Exobasidiaceae	g__Exobasidiaceae_gen_Incertae_sedis	s__Exobasidiaceae_sp
OTU045	MOSTABUND|n=185/96	79	35	71	OR091314	SH0801460.10FU	2.22881e-079	298.431	161	1	161	347	507	161	161	100	100	161	k__Fungi	p__Ascomycota	c__Eurotiomycetes	o__Phaeomoniellales	f__Celotheliaceae	g__Phaeomoniella	s__Phaeomoniella_sp
OTU046	MOSTABUND|n=174/52	68	35	71	MH864788	SH0885672.10FU	6.97619e-090	333.517	180	1	180	357	536	180	180	100	100	180	k__Fungi	p__Ascomycota	c__Eurotiomycetes	o__Chaetothyriales	f__Herpotrichiellaceae	g__Rhinocladiella	s__Rhinocladiella_atrovirens
OTU047	MOSTABUND|n=169/81	65	22	82	PP151174	SH0962330.10FU	3.39167e-072	274.424	148	1	148	359	506	148	148	100	100	148	k__Fungi	p__Ascomycota	c__Dothideomycetes	o__Cladosporiales	f__Cladosporiaceae	g__Cladosporium	s__Cladosporium_cladosporioides
OTU048	MOSTABUND|n=165/62	53	32	80	OU953798	SH1012135.10FU	1.53887e-070	268.884	145	1	145	317	461	145	145	100	100	145	k__Fungi	p__Ascomycota	c__Leotiomycetes	o__Helotiales	f__Hyaloscyphaceae	g__Hyaloscyphaceae_gen_Incertae_sedis	s__Hyaloscyphaceae_sp
OTU049	MOSTABUND|n=158/102	45	28	85	UDB03126426	SH0966817.10FU	2.01308e-049	198.712	107	1	143	327	469	132	132	92.3	100	143	k__Fungi	p__Ascomycota	c__Leotiomycetes	o__Leotiales	f__Tympanidaceae	g__Claussenomyces	s__Claussenomyces_sp
OTU050	MOSTABUND|n=155/110	56	31	68	LC015666	SH0960444.10FU	1.52938e-050	202.405	109	1	141	341	483	132	132	93.6	100	141	k__Fungi	p__Ascomycota	c__Lecanoromycetes	o__Lecanoromycetes_ord_Incertae_sedis	f__Lecanoromycetes_fam_Incertae_sedis	g__Lecanoromycetes_gen_Incertae_sedis	s__Lecanoromycetes_sp
OTU051	MOSTABUND|n=144/44	48	43	53	OR531385	SH0986908.10FU	1.85127e-085	318.744	172	1	172	390	561	172	172	100	100	172	k__Fungi	p__Ascomycota	c__Eurotiomycetes	o__Chaetothyriales	f__Herpotrichiellaceae	g__Exophiala	s__Exophiala_xenobiotica
OTU052	MOSTABUND|n=143/51	50	31	62	MZ133732	SH0875505.10FU	2.96467e-053	211.638	114	1	160	421	584	148	148	92.5	100	160	k__Fungi	p__Ascomycota	c__Eurotiomycetes	o__Onygenales	f__Gymnoascaceae	g__Gymnoascus	s__Gymnoascus_halophilus
OTU053	MOSTABUND|n=137/76	56	23	58
OTU054	MOSTABUND|n=137/77	32	35	70	LS998796	SH1015806.10FU	8.18478e-059	230.105	124	1	160	335	495	152	152	95	100	160	k__Fungi	p__Ascomycota	c__Dothideomycetes	o__Venturiales	f__Cylindrosympodiaceae	g__Septonema	s__Septonema_sp
OTU055	MOSTABUND|n=130/60	35	22	73	UDB02000288	SH0944003.10FU	1.08119e-043	180.245	97	1	132	346	479	123	123	93.2	66.3	199	k__Fungi	p__Ascomycota	c__Eurotiomycetes	o__Chaetothyriales	f__Herpotrichiellaceae	g__Exophiala	s__Exophiala_sp
OTU056	MOSTABUND|n=128/69	46	21	61	KX822546	SH0986077.10FU	3.16379e-028	128.539	69	1	129	391	514	112	112	86.8	78.7	164	k__Fungi	p__Ascomycota	c__Eurotiomycetes	o__Chaetothyriales	f__Chaetothyriales_fam_Incertae_sedis	g__Chaetothyriales_gen_Incertae_sedis	s__Chaetothyriales_sp
OTU057	MOSTABUND|n=127/60	42	25	60	UDB05377383	SH0949870.10FU	6.80457e-116	420.31	227	1	227	298	524	227	227	100	100	227	k__Fungi	p__Basidiomycota	c__Cystobasidiomycetes	o__Erythrobasidiales	f__Erythrobasidiales_fam_Incertae_sedis	g__Erythrobasidiales_gen_Incertae_sedis	s__Erythrobasidiales_sp
OTU058	MOSTABUND|n=121/39	44	30	47	UDB02013834	SH0904555.10FU	2.19599e-085	318.744	172	1	196	361	557	189	189	96.4	98.5	199	k__Fungi	p__Ascomycota	c__Eurotiomycetes	o__Chaetothyriales	f__Herpotrichiellaceae	g__Exophiala	s__Exophiala_sp
OTU059	MOSTABUND|n=119/57	49	30	40	UDB06550829	SH0946271.10FU	2.24642e-105	385.223	208	1	208	332	539	208	208	100	100	208	k__Fungi	p__Basidiomycota	c__Microbotryomycetes	o__Sporidiobolales	f__Sporidiobolaceae	g__Rhodotorula	s__Rhodotorula_sp
OTU060	MOSTABUND|n=115/52	7	26	82	AM901832	SH0934681.10FU	4.12437e-108	394.457	213	1	227	539	762	223	223	98.2	100	227	k__Fungi	p__Basidiomycota	c__Exobasidiomycetes	o__Exobasidiales	f__Exobasidiaceae	g__Exobasidium	s__Exobasidium_sp
OTU061	MOSTABUND|n=93/26	10	7	76	OK335192	SH0888269.10FU	1.85127e-085	318.744	172	1	172	350	521	172	172	100	100	172	k__Fungi	p__Ascomycota	c__Eurotiomycetes	o__Eurotiales	f__Aspergillaceae	g__Aspergillus	s__Aspergillus_sp
OTU062	MOSTABUND|n=75/31	37	12	26	MZ573462	SH0735889.10FU	5.18273e-086	320.591	173	1	173	446	618	173	173	100	100	173	k__Fungi	p__Ascomycota	c__Dothideomycetes	o__Venturiales	f__Sympoventuriaceae	g__Ochroconis	s__Ochroconis_sp
OTU063	MOSTABUND|n=74/11	24	14	36
OTU064	MOSTABUND|n=71/33	20	23	28	KT264384	SH0904651.10FU	7.62267e-085	316.897	171	1	193	387	578	186	186	96.4	100	193	k__Fungi	p__Ascomycota	c__Eurotiomycetes	o__Chaetothyriales	f__Herpotrichiellaceae	g__Exophiala	s__Exophiala_sp
OTU065	MOSTABUND|n=71/33	16	14	41	OR898185	SH0815720.10FU	1.72241e-096	355.677	192	1	204	454	658	201	201	98.5	100	204	k__Fungi	p__Basidiomycota	c__Agaricomycetes	o__Agaricales	f__Pleurotaceae	g__Hohenbuehelia	s__Hohenbuehelia_grisea
OTU066	MOSTABUND|n=67/37	22	10	35	OX346372	SH0763677.10FU	7.34168e-069	263.345	142	1	148	318	465	146	146	98.6	100	148	k__Fungi	p__Ascomycota	c__Dothideomycetes	o__Mycosphaerellales	f__Neodevriesiaceae	g__Neodevriesia	s__Neodevriesia_fraserae
OTU067	MOSTABUND|n=64/22	23	10	31	UDB01990490	SH0976639.10FU	8.79133e-084	313.204	169	1	175	356	530	173	173	98.9	100	175	k__Fungi	p__Ascomycota	c__Eurotiomycetes	o__Chaetothyriales	f__Herpotrichiellaceae	g__Exophiala	s__Exophiala_sp
OTU068	MOSTABUND|n=63/36	24	10	29	KM104110	SH0967380.10FU	2.15769e-064	248.571	134	1	154	366	521	149	149	96.8	100	154	k__Fungi	p__Fungi_phy_Incertae_sedis	c__Fungi_cls_Incertae_sedis	o__Fungi_ord_Incertae_sedis	f__Fungi_fam_Incertae_sedis	g__Fungi_gen_Incertae_sedis	s__Fungi_sp
OTU069	MOSTABUND|n=59/35	22	17	20	UDB05349834	SH0867021.10FU	1.41853e-032	143.312	77	18	193	302	478	147	147	83.5	88.4	199	k__Fungi	p__Basidiomycota	c__Pucciniomycetes	o__Platygloeales	f__Eocronartiaceae	g__Eocronartium	s__Eocronartium_sp
OTU070	MOSTABUND|n=57/31	18	21	18	OU989284	SH0843807.10FU	7.47067e-074	279.964	151	1	151	351	501	151	151	100	100	151	k__Fungi	p__Ascomycota	c__Saccharomycetes	o__Saccharomycetales	f__Trichomonascaceae	g__Blastobotrys	s__Blastobotrys_arbuscula
OTU071	MOSTABUND|n=48/9	16	8	24	OR091312	SH0974820.10FU	2.7278e-079	298.431	161	1	191	369	559	182	182	95.3	100	191	k__Fungi	p__Ascomycota	c__Eurotiomycetes	o__Chaetothyriales	f__Herpotrichiellaceae	g__Capronia	s__Capronia_sp
OTU072	MOSTABUND|n=48/25	17	19	12	LT548263	SH0734002.10FU	3.39464e-089	331.671	179	1	234	342	580	220	220	94	100	234	k__Fungi	p__Basidiomycota	c__Microbotryomycetes	o__Microbotryomycetes_ord_Incertae_sedis	f__Colacogloeaceae	g__Colacogloea	s__Colacogloea_sp
OTU073	MOSTABUND|n=47/23	16	12	19
OTU074	MOSTABUND|n=46/17	18	15	13	UDB01571240	SH0947752.10FU	1.71027e-101	372.297	201	1	204	297	500	203	203	99.5	100	204	k__Fungi	p__Basidiomycota	c__Cystobasidiomycetes	o__Buckleyzymales	f__Buckleyzymaceae	g__Buckleyzyma	s__Buckleyzyma_sp
OTU075	MOSTABUND|n=43/11	20	9	14	KF360373	SH0737941.10FU	1.7063e-060	235.645	127	1	139	317	455	135	135	97.1	89.1	156	k__Fungi	p__Ascomycota	c__Lecanoromycetes	o__Umbilicariales	f__Elixiaceae	g__Elixia	s__Elixia_flexella
OTU076	MOSTABUND|n=38/1	23	8	7	UDB03610486	SH1012176.10FU	2.55325e-068	261.498	141	1	144	317	460	143	143	99.3	100	144	k__Fungi	p__Ascomycota	c__Leotiomycetes	o__Helotiales	f__Helotiales_fam_Incertae_sedis	g__Infundichalara	s__Infundichalara_sp
OTU077	MOSTABUND|n=35/16	8	6	21	HQ211632	SH0934667.10FU	3.60198e-093	344.597	186	1	198	373	570	194	194	98	100	198	k__Fungi	p__Basidiomycota	c__Exobasidiomycetes	o__Exobasidiales	f__Exobasidiaceae	g__Exobasidiaceae_gen_Incertae_sedis	s__Exobasidiaceae_sp
OTU078	MOSTABUND|n=34/16	13	10	11	OR623240	SH0841251.10FU	1.00024e-098	363.064	196	1	199	263	462	199	199	100	100	199	k__Fungi	p__Basidiomycota	c__Agaricostilbomycetes	o__Agaricostilbales	f__Chionosphaeraceae	g__Kurtzmanomyces	s__Kurtzmanomyces_sp
OTU079	MOSTABUND|n=33/1	11	8	14	UDB03610486	SH1012176.10FU	2.55325e-068	261.498	141	1	144	317	460	143	143	99.3	100	144	k__Fungi	p__Ascomycota	c__Leotiomycetes	o__Helotiales	f__Helotiales_fam_Incertae_sedis	g__Infundichalara	s__Infundichalara_sp
OTU080	MOSTABUND|n=32/14	7	3	22	UDB0525539	SH0924986.10FU	6.00805e-075	283.658	153	1	156	328	483	155	155	99.4	100	156	k__Fungi	p__Ascomycota	c__Dothideomycetes	o__Mytilinidiales	f__Mytilinidiaceae	g__Lophium	s__Lophium_sp
OTU081	MOSTABUND|n=31/14	16	7	8
OTU082	MOSTABUND|n=31/10	10	9	12	MK801314	SH0950131.10FU	1.01375e-077	292.891	158	1	158	392	549	158	158	100	100	158	k__Fungi	p__Ascomycota	c__Xylonomycetes	o__Symbiotaphrinales	f__Symbiotaphrinaceae	g__Symbiotaphrina	s__Symbiotaphrina_microtheca
OTU083	MOSTABUND|n=30/15	7	2	21	OR762723	SH0862152.10FU	1.64456e-075	285.504	154	1	154	320	473	154	154	100	100	154	k__Fungi	p__Ascomycota	c__Dothideomycetes	o__Pleosporales	f__Didymellaceae	g__Epicoccum	s__Epicoccum_nigrum
OTU084	MOSTABUND|n=29/13	16	4	9	KU580076	SH0959039.10FU	2.84012e-078	294.738	159	1	159	355	513	159	159	100	100	159	k__Fungi	p__Ascomycota	c__Dothideomycetes	o__Capnodiales	f__Capnodiales_fam_Incertae_sedis	g__Capnodiales_gen_Incertae_sedis	s__Capnodiales_sp
OTU085	MOSTABUND|n=28/10	20	4	4	OR752061	SH0939958.10FU	3.84148e-082	307.664	166	1	166	365	530	166	166	100	100	166	k__Fungi	p__Ascomycota	c__Eurotiomycetes	o__Eurotiales	f__Aspergillaceae	g__Aspergillus	s__Aspergillus_tubingensis
OTU086	MOSTABUND|n=28/17	10	6	12	FM173097	SH0974823.10FU	7.48491e-085	316.897	171	1	189	359	548	184	184	97.4	99.5	190	k__Fungi	p__Ascomycota	c__Eurotiomycetes	o__Chaetothyriales	f__Herpotrichiellaceae	g__Exophiala	s__Exophiala_sp
OTU087	MOSTABUND|n=28/16	10	6	12	OR803396	SH0939434.10FU	7.95641e-079	296.584	160	1	160	362	521	160	160	100	100	160	k__Fungi	p__Ascomycota	c__Eurotiomycetes	o__Eurotiales	f__Aspergillaceae	g__Penicillium	s__Penicillium_sp
OTU088	MOSTABUND|n=27/5	9	7	11	MK050392	SH0964633.10FU	1.39312e-057	226.412	122	1	184	2085	2270	167	167	90.8	91.1	202	k__Fungi	p__Basidiomycota	c__Cystobasidiomycetes	o__Cystobasidiales	f__Cystobasidiales_fam_Incertae_sedis	g__Robertozyma	s__Robertozyma_ningxiaensis
OTU089	MOSTABUND|n=27/18	13	6	8
OTU090	MOSTABUND|n=26/4	7	4	15	KJ522801	SH0904731.10FU	1.27885e-097	359.37	194	1	197	365	562	197	197	100	100	197	k__Fungi	p__Ascomycota	c__Eurotiomycetes	o__Chaetothyriales	f__Herpotrichiellaceae	g__Exophiala	s__Exophiala_heteromorpha
OTU091	MOSTABUND|n=26/12	12	4	10	UDB04160857	SH0939704.10FU	2.84012e-078	294.738	159	1	159	336	494	159	159	100	100	159	k__Fungi	p__Ascomycota	c__Eurotiomycetes	o__Eurotiales	f__Aspergillaceae	g__Penicillium	s__Penicillium_sp
OTU092	MOSTABUND|n=26/15	7	6	13	MW710662	SH0915545.10FU	5.18273e-086	320.591	173	1	173	331	503	173	173	100	100	173	k__Fungi	p__Ascomycota	c__Dothideomycetes	o__Dothideales	f__Zalariaceae	g__Zalaria	s__Zalaria_alba
OTU093	MOSTABUND|n=26/12	8	7	11	GQ169320	SH0973416.10FU	2.36174e-084	315.051	170	1	170	347	516	170	170	100	100	170	k__Fungi	p__Ascomycota	c__Eurotiomycetes	o__Eurotiales	f__Trichocomaceae	g__Sagenomella	s__Sagenomella_griseoviridis
OTU094	MOSTABUND|n=25/7	6	8	11
OTU095	MOSTABUND|n=23/12	15	2	6
OTU096	MOSTABUND|n=22/10	0	20	2	OQ717810	SH0843146.10FU	6.09834e-066	254.111	137	1	172	466	634	162	162	94.2	88.7	194	k__Fungi	p__Ascomycota	c__Eurotiomycetes	o__Mycocaliciales	f__Mycocaliciaceae	g__Chaenothecopsis	s__Chaenothecopsis_sp
OTU097	MOSTABUND|n=21/9	2	15	4
OTU098	MOSTABUND|n=21/16	11	2	8
OTU099	MOSTABUND|n=20/9	7	3	10	OQ694453	SH0899106.10FU	1.96687e-056	222.718	120	1	213	442	648	184	184	86.4	97.7	218	k__Fungi	p__Basidiomycota	c__Agaricostilbomycetes	o__Agaricostilbales	f__Chionosphaeraceae	g__Chionosphaera	s__Chionosphaera_cuniculicola
OTU100	MOSTABUND|n=19/12	8	5	6	UDB019754	SH0885763.10FU	3.51384e-098	361.217	195	1	195	372	566	195	195	100	100	195	k__Fungi	p__Basidiomycota	c__Exobasidiomycetes	o__Exobasidiales	f__Brachybasidiaceae	g__Meira	s__Meira_sp
OTU101	MOSTABUND|n=19/6	8	6	5	UDB01624955	SH0976701.10FU	5.67491e-091	337.211	182	1	188	353	540	186	186	98.9	100	188	k__Fungi	p__Ascomycota	c__Eurotiomycetes	o__Chaetothyriales	f__Herpotrichiellaceae	g__Capronia	s__Capronia_sp
OTU102	MOSTABUND|n=19/3	8	4	7	MK212381	SH0763728.10FU	2.09388e-074	281.811	152	1	152	390	541	152	152	100	100	152	k__Fungi	p__Ascomycota	c__Ascomycota_cls_Incertae_sedis	o__Ascomycota_ord_Incertae_sedis	f__Ascomycota_fam_Incertae_sedis	g__Ascomycota_gen_Incertae_sedis	s__Ascomycota_sp
OTU103	MOSTABUND|n=19/10	5	8	6	OW985768	SH0960075.10FU	1.29135e-076	289.198	156	1	156	362	517	156	156	100	100	156	k__Fungi	p__Ascomycota	c__Dothideomycetes	o__Pleosporales	f__Coniothyriaceae	g__Ochrocladosporium	s__Ochrocladosporium_elatum
OTU104	MOSTABUND|n=17/5	9	5	3
OTU105	MOSTABUND|n=17/8	4	6	7	KF274298	SH1027636.10FU	3.44208e-023	111.919	60	1	63	418	480	62	62	98.4	36	175	k__Fungi	p__Fungi_phy_Incertae_sedis	c__Fungi_cls_Incertae_sedis	o__Fungi_ord_Incertae_sedis	f__Fungi_fam_Incertae_sedis	g__Fungi_gen_Incertae_sedis	s__Fungi_sp
OTU106	MOSTABUND|n=17/7	3	7	7	LC643135	SH0878054.10FU	3.01238e-083	311.357	168	1	168	384	551	168	168	100	100	168	k__Fungi	p__Ascomycota	c__Eurotiomycetes	o__Eurotiales	f__Aspergillaceae	g__Aspergillus	s__Aspergillus_conicus
OTU107	MOSTABUND|n=16/9	7	1	8	UDB02747428	SH0960493.10FU	1.93347e-059	231.952	125	1	140	295	434	135	135	96.4	100	140	k__Fungi	p__Ascomycota	c__Eurotiomycetes	o__Eurotiomycetes_ord_Incertae_sedis	f__Eurotiomycetes_fam_Incertae_sedis	g__Eurotiomycetes_gen_Incertae_sedis	s__Eurotiomycetes_sp
OTU108	MOSTABUND|n=15/9	7	2	6	DQ870625	SH0880564.10FU	5.51045e-122	440.623	238	1	238	356	593	238	238	100	100	238	k__Fungi	p__Basidiomycota	c__Microbotryomycetes	o__Microbotryomycetes_ord_Incertae_sedis	f__Colacogloeaceae	g__Colacogloea	s__Colacogloea_subericola
OTU109	MOSTABUND|n=15/3	4	0	11	MG707511	SH0974827.10FU	3.04486e-109	398.15	215	1	218	429	646	217	217	99.5	100	218	k__Fungi	p__Ascomycota	c__Eurotiomycetes	o__Chaetothyriales	f__Herpotrichiellaceae	g__Herpotrichiellaceae_gen_Incertae_sedis	s__Herpotrichiellaceae_sp
OTU110	MOSTABUND|n=14/8	7	5	2	DQ494360	SH0965749.10FU	1.32138e-076	289.198	156	1	159	316	474	158	158	99.4	100	159	k__Fungi	p__Ascomycota	c__Orbiliomycetes	o__Orbiliales	f__Orbiliaceae	g__Dactylella	s__Dactylella_tenuis
OTU111	MOSTABUND|n=14/9	6	3	5	KF780603	SH0838052.10FU	3.61826e-077	291.044	157	1	157	306	462	157	157	100	100	157	k__Fungi	p__Ascomycota	c__Sordariomycetes	o__Hypocreales	f__Hypocreales_fam_Incertae_sedis	g__Hypocreales_gen_Incertae_sedis	s__Hypocreales_sp
OTU112	MOSTABUND|n=14/8	5	3	6
OTU113	MOSTABUND|n=14/7	4	4	6	HQ611336	SH0846888.10FU	3.39167e-072	274.424	148	1	148	296	443	148	148	100	100	148	k__Fungi	p__Mortierellomycota	c__Mortierellomycetes	o__Mortierellales	f__Mortierellales_fam_Incertae_sedis	g__Mortierellales_gen_Incertae_sedis	s__Mortierellales_sp
OTU114	MOSTABUND|n=13/7	5	4	4
OTU115	MOSTABUND|n=13/7	11	1	1	UDB01766759	SH1001257.10FU	7.65141e-074	279.964	151	1	154	333	486	153	153	99.4	100	154	k__Fungi	p__Ascomycota	c__Eurotiomycetes	o__Chaetothyriales	f__Chaetothyriales_fam_Incertae_sedis	g__Chaetothyriales_gen_Incertae_sedis	s__Chaetothyriales_sp
OTU116	MOSTABUND|n=13/7	3	3	7	OQ690209	SH0964714.10FU	2.21854e-090	335.364	181	1	202	324	525	195	195	96.5	100	202	k__Fungi	p__Basidiomycota	c__Cystobasidiomycetes	o__Cystobasidiales	f__Cystobasidiaceae	g__Cystobasidium	s__Cystobasidium_calyptogenae
OTU117	MOSTABUND|n=12/3	4	2	6	OP941495	SH0953911.10FU	2.51947e-105	385.223	208	2	230	309	537	222	222	96.9	99.6	230	k__Fungi	p__Basidiomycota	c__Tremellomycetes	o__Filobasidiales	f__Piskurozymaceae	g__Solicoccozyma	s__Solicoccozyma_sp
OTU118	MOSTABUND|n=12/6	3	7	2
OTU119	MOSTABUND|n=11/1	5	0	6	UDB05269281	SH0868848.10FU	6.56694e-075	283.658	153	1	168	393	560	163	163	97	100	168	k__Fungi	p__Ascomycota	c__Dothideomycetes	o__Dothideomycetes_ord_Incertae_sedis	f__Dothideomycetes_fam_Incertae_sedis	g__Dothideomycetes_gen_Incertae_sedis	s__Dothideomycetes_sp
OTU120	MOSTABUND|n=11/5	4	1	6	MK491201	SH0964639.10FU	5.9149e-096	353.83	191	1	196	255	450	194	194	99	100	196	k__Fungi	p__Basidiomycota	c__Cystobasidiomycetes	o__Cyphobasidiales	f__Cyphobasidiales_fam_Incertae_sedis	g__Cyphobasidiales_gen_Incertae_sedis	s__Cyphobasidiales_sp
OTU121	MOSTABUND|n=11/5	7	0	4	OR810007	SH0939434.10FU	7.95641e-079	296.584	160	1	160	301	460	160	160	100	100	160	k__Fungi	p__Ascomycota	c__Eurotiomycetes	o__Eurotiales	f__Aspergillaceae	g__Penicillium	s__Penicillium_bialowiezense
OTU122	MOSTABUND|n=11/7	3	2	6	MK782305	SH0850121.10FU	1.33784e-051	206.098	111	1	156	323	490	151	151	96.8	100	156	k__Fungi	p__Ascomycota	c__Saccharomycetes	o__Saccharomycetales	f__Saccharomycetales_fam_Incertae_sedis	g__Saccharomycetales_gen_Incertae_sedis	s__Saccharomycetales_sp
OTU123	MOSTABUND|n=10/5	3	3	4
OTU124	MOSTABUND|n=10/6	2	4	4	KF274277	SH0881288.10FU	5.86833e-075	283.658	153	1	153	345	497	153	153	100	100	153	k__Fungi	p__Basidiomycota	c__Tremellomycetes	o__Tremellales	f__Tremellales_fam_Incertae_sedis	g__Tremellales_gen_Incertae_sedis	s__Tremellales_sp
OTU125	MOSTABUND|n=10/4	6	2	2	OP470251	SH0958692.10FU	1.68885e-045	185.785	100	1	152	242	397	138	138	90.8	100	152	k__Fungi	p__Basidiomycota	c__Tremellomycetes	o__Filobasidiales	f__Filobasidiaceae	g__Filobasidium	s__Filobasidium_sp
OTU126	MOSTABUND|n=9/5	5	1	3	MZ503735	SH0985059.10FU	2.87382e-104	381.53	206	1	206	502	707	206	206	100	100	206	k__Fungi	p__Ascomycota	c__Dothideomycetes	o__Venturiales	f__Sympoventuriaceae	g__Scolecobasidium	s__Scolecobasidium_globale
OTU127	MOSTABUND|n=9/3	4	2	3	OR623243	SH0958738.10FU	3.03363e-073	278.118	150	1	167	289	451	162	162	97	100	167	k__Fungi	p__Ascomycota	c__Saccharomycetes	o__Saccharomycetales	f__Trichomonascaceae	g__Blastobotrys	s__Blastobotrys_sp
OTU128	MOSTABUND|n=9/6	4	4	1
OTU129	MOSTABUND|n=9/2	4	0	5	MZ025963	SH0763728.10FU	2.73027e-073	278.118	150	1	153	325	477	152	152	99.3	100	153	k__Fungi	p__Ascomycota	c__Dothideomycetes	o__Mycosphaerellales	f__Neodevriesiaceae	g__Neodevriesia	s__Neodevriesia_kalakoutskii
OTU130	MOSTABUND|n=8/1	4	0	4	DQ870625	SH0880564.10FU	2.79092e-060	235.645	127	1	238	356	593	207	207	87	100	238	k__Fungi	p__Basidiomycota	c__Microbotryomycetes	o__Microbotryomycetes_ord_Incertae_sedis	f__Colacogloeaceae	g__Colacogloea	s__Colacogloea_subericola
OTU131	MOSTABUND|n=8/3	4	4	0	KF360374	SH0737973.10FU	6.04643e-065	250.418	135	1	143	317	459	140	140	97.9	92.3	155	k__Fungi	p__Ascomycota	c__Lecanoromycetes	o__Umbilicariales	f__Elixiaceae	g__Elixia	s__Elixia_sp
OTU132	MOSTABUND|n=8/2	0	0	8	AB597207	SH0924978.10FU	2.27871e-079	298.431	161	1	164	406	569	163	163	99.4	100	164	k__Fungi	p__Ascomycota	c__Dothideomycetes	o__Tubeufiales	f__Tubeufiaceae	g__Helicoma	s__Helicoma_isiola
OTU133	MOSTABUND|n=8/2	2	4	2	UDB01788704	SH0944887.10FU	3.72804e-072	274.424	148	1	160	334	493	156	156	97.5	100	160	k__Fungi	p__Ascomycota	c__Eurotiomycetes	o__Chaetothyriales	f__Chaetothyriales_fam_Incertae_sedis	g__Chaetothyriales_gen_Incertae_sedis	s__Chaetothyriales_sp
OTU134	MOSTABUND|n=8/1	4	1	3	GU062229	SH0926075.10FU	1.29456e-118	429.543	232	1	252	308	561	247	247	98	98.4	256	k__Fungi	p__Basidiomycota	c__Basidiomycota_cls_Incertae_sedis	o__Basidiomycota_ord_Incertae_sedis	f__Basidiomycota_fam_Incertae_sedis	g__Basidiomycota_gen_Incertae_sedis	s__Basidiomycota_sp
OTU135	MOSTABUND|n=8/4	1	0	7	KF360402	SH0737922.10FU	1.67984e-060	235.645	127	1	142	332	473	137	137	96.5	92.2	154	k__Fungi	p__Ascomycota	c__Lecanoromycetes	o__Umbilicariales	f__Umbilicariaceae	g__Fulgidea	s__Fulgidea_sierrae
OTU136	MOSTABUND|n=7/4	0	2	5	UDB06553245	SH0965184.10FU	2.73027e-073	278.118	150	1	153	328	480	152	152	99.3	100	153	k__Fungi	p__Ascomycota	c__Sareomycetes	o__Sareales	f__Sareaceae	g__Sarea	s__Sarea_sp
OTU137	MOSTABUND|n=7/7	7	0	0	OR378530	SH0856167.10FU	2.36174e-084	315.051	170	1	170	312	481	170	170	100	100	170	k__Fungi	p__Basidiomycota	c__Tremellomycetes	o__Trichosporonales	f__Trichosporonaceae	g__Trichosporon	s__Trichosporon_sp
OTU138	MOSTABUND|n=7/5	3	0	4	OR623240	SH0841251.10FU	6.17667e-086	320.591	173	1	201	263	462	193	193	96	100	201	k__Fungi	p__Basidiomycota	c__Agaricostilbomycetes	o__Agaricostilbales	f__Chionosphaeraceae	g__Kurtzmanomyces	s__Kurtzmanomyces_sp
OTU139	MOSTABUND|n=7/5	4	1	2	UDB0681378	SH0950387.10FU	1.20978e-071	272.578	147	1	147	321	467	147	147	100	100	147	k__Fungi	p__Ascomycota	c__Leotiomycetes	o__Thelebolales	f__Pseudeurotiaceae	g__Pseudeurotium	s__Pseudeurotium_sp
OTU140	MOSTABUND|n=7/1	3	4	0	UDB03610486	SH1012176.10FU	5.52681e-065	250.418	135	1	141	317	457	139	139	98.6	97.9	144	k__Fungi	p__Ascomycota	c__Leotiomycetes	o__Helotiales	f__Helotiales_fam_Incertae_sedis	g__Infundichalara	s__Infundichalara_sp
OTU141	MOSTABUND|n=6/2	1	1	4	MT872624	SH0912804.10FU	3.54669e-052	207.945	112	1	150	578	729	139	139	92.7	100	150	k__Fungi	p__Ascomycota	c__Eurotiomycetes	o__Eurotiomycetes_ord_Incertae_sedis	f__Eurotiomycetes_fam_Incertae_sedis	g__Eurotiomycetes_gen_Incertae_sedis	s__Eurotiomycetes_sp
OTU142	MOSTABUND|n=6/1	2	3	1	OL739376	SH0743871.10FU	1.33076e-071	272.578	147	1	159	407	565	155	155	97.5	100	159	k__Fungi	p__Basidiomycota	c__Tremellomycetes	o__Tremellales	f__Naemateliaceae	g__Naematelia	s__Naematelia_encephala
OTU143	MOSTABUND|n=6/3	3	2	1	MN654822	SH0950025.10FU	1.46384e-022	110.073	59	1	151	301	453	125	125	82.8	74.8	202	k__Fungi	p__Basidiomycota	c__Cystobasidiomycetes	o__Cystobasidiomycetes_ord_Incertae_sedis	f__Cystobasidiomycetes_fam_Incertae_sedis	g__Cystobasidiomycetes_gen_Incertae_sedis	s__Cystobasidiomycetes_sp
OTU144	MOSTABUND|n=6/3	2	1	3
OTU145	MOSTABUND|n=6/1	1	0	5	UDB02020736	SH0843027.10FU	9.34009e-068	259.651	140	1	146	305	450	144	144	98.6	100	146	k__Fungi	p__Ascomycota	c__Dothideomycetes	o__Mycosphaerellales	f__Teratosphaeriaceae	g__Neocatenulostroma	s__Neocatenulostroma_sp
OTU146	MOSTABUND|n=6/3	4	1	1	OR769498	SH0925964.10FU	1.64456e-075	285.504	154	1	154	394	547	154	154	100	100	154	k__Fungi	p__Ascomycota	c__Dothideomycetes	o__Dothideales	f__Saccotheciaceae	g__Aureobasidium	s__Aureobasidium_pullulans
OTU147	MOSTABUND|n=6/3	3	2	1	JN053509	SH0847499.10FU	9.75532e-100	366.757	198	1	235	343	576	225	225	95.7	96.3	244	k__Fungi	p__Basidiomycota	c__Tremellomycetes	o__Filobasidiales	f__Filobasidiaceae	g__Syzygospora	s__Syzygospora_alba
OTU148	MOSTABUND|n=6/5	3	1	2	UDB0952315	SH0992159.10FU	2.21577e-045	185.785	100	31	176	308	452	131	131	89.7	76.4	191	k__Fungi	p__Basidiomycota	c__Agaricostilbomycetes	o__Agaricostilbales	f__Agaricostilbales_fam_Incertae_sedis	g__Agaricostilbales_gen_Incertae_sedis	s__Agaricostilbales_sp
OTU149	MOSTABUND|n=6/3	3	2	1	OQ448344	SH0964621.10FU	1.68128e-101	372.297	201	1	201	318	518	201	201	100	100	201	k__Fungi	p__Basidiomycota	c__Cystobasidiomycetes	o__Cystobasidiales	f__Cystobasidiaceae	g__Cystobasidium	s__Cystobasidium_laryngis
OTU150	MOSTABUND|n=6/1	0	2	4	UDB05349834	SH0867021.10FU	2.35991e-030	135.926	73	36	192	322	478	134	134	85.4	79.3	198	k__Fungi	p__Basidiomycota	c__Pucciniomycetes	o__Platygloeales	f__Eocronartiaceae	g__Eocronartium	s__Eocronartium_sp
OTU151	MOSTABUND|n=6/1	0	3	3	KJ706356	SH0946266.10FU	8.03493e-105	383.377	207	1	207	366	572	207	207	100	100	207	k__Fungi	p__Basidiomycota	c__Microbotryomycetes	o__Microbotryomycetes_ord_Incertae_sedis	f__Chrysozymaceae	g__Hamamotoa	s__Hamamotoa_singularis
OTU152	MOSTABUND|n=5/4	1	2	2	KM104151	SH0907363.10FU	4.96695e-087	324.284	175	1	205	390	594	197	197	96.1	98.6	208	k__Fungi	p__Fungi_phy_Incertae_sedis	c__Fungi_cls_Incertae_sedis	o__Fungi_ord_Incertae_sedis	f__Fungi_fam_Incertae_sedis	g__Fungi_gen_Incertae_sedis	s__Fungi_sp
OTU153	MOSTABUND|n=5/4	1	3	1	LC317582	SH0976373.10FU	5.46342e-091	337.211	182	1	182	382	563	182	182	100	100	182	k__Fungi	p__Ascomycota	c__Eurotiomycetes	o__Chaetothyriales	f__Herpotrichiellaceae	g__Exophiala	s__Exophiala_angulospora
OTU154	MOSTABUND|n=5/3	3	1	1	MK782308	SH0925502.10FU	7.22033e-069	263.345	142	1	146	758	902	145	145	99.3	100	146	k__Fungi	p__Ascomycota	c__Leotiomycetes	o__Helotiales	f__Helotiales_fam_Incertae_sedis	g__Helotiales_gen_Incertae_sedis	s__Helotiales_sp
OTU155	MOSTABUND|n=5/5	1	0	4	KF156038	SH0735104.10FU	1.0027e-088	329.824	178	1	178	447	624	178	178	100	90.4	197	k__Fungi	p__Ascomycota	c__Dothideomycetes	o__Venturiales	f__Sympoventuriaceae	g__Ochroconis	s__Ochroconis_longiphorum
OTU156	MOSTABUND|n=5/3	1	4	0	OQ568166	SH0964631.10FU	4.70145e-102	374.144	202	1	202	272	473	202	202	100	100	202	k__Fungi	p__Basidiomycota	c__Cystobasidiomycetes	o__Cystobasidiales	f__Cystobasidiaceae	g__Cystobasidium	s__Cystobasidium_slooffiae
OTU157	MOSTABUND|n=5/1	1	1	3	UDB07650033	SH0948279.10FU	2.07665e-060	235.645	127	2	172	291	452	158	158	92.4	92.9	184	k__Fungi	p__Ascomycota	c__Saccharomycetes	o__Saccharomycetales	f__Trichomonascaceae	g__Sugiyamaella	s__Sugiyamaella_sp
OTU158	MOSTABUND|n=5/4	0	0	5	OR913034	SH0995683.10FU	6.24317e-080	300.278	162	1	162	373	534	162	162	100	100	162	k__Fungi	p__Ascomycota	c__Sordariomycetes	o__Xylariales	f__Graphostromataceae	g__Biscogniauxia	s__Biscogniauxia_mediterranea
OTU159	MOSTABUND|n=5/2	1	4	0	OR965240	SH0939544.10FU	6.24317e-080	300.278	162	1	162	346	507	162	162	100	100	162	k__Fungi	p__Ascomycota	c__Eurotiomycetes	o__Eurotiales	f__Aspergillaceae	g__Penicillium	s__Penicillium_sp
OTU160	MOSTABUND|n=5/1	2	0	3	UDB03609281	SH1012176.10FU	2.55325e-068	261.498	141	1	144	317	460	143	143	99.3	100	144	k__Fungi	p__Ascomycota	c__Leotiomycetes	o__Helotiales	f__Helotiales_fam_Incertae_sedis	g__Infundichalara	s__Infundichalara_sp
OTU161	MOSTABUND|n=5/1	0	0	5	UDB07674985	SH1012176.10FU	5.52681e-065	250.418	135	1	144	315	458	141	141	97.9	100	144	k__Fungi	p__Ascomycota	c__Leotiomycetes	o__Helotiales	f__Pezizellaceae	g__Ciliolarina	s__Ciliolarina_sp
OTU162	MOSTABUND|n=4/1	0	0	4	KP018070	SH0847946.10FU	4.70145e-102	374.144	202	1	202	257	458	202	202	100	100	202	k__Fungi	p__Basidiomycota	c__Exobasidiomycetes	o__Exobasidiales	f__Brachybasidiaceae	g__Meira	s__Meira_sp
OTU163	MOSTABUND|n=4/1	0	2	2	OR761551	SH0887053.10FU	5.78065e-091	337.211	182	1	191	356	546	188	188	98.4	100	191	k__Fungi	p__Ascomycota	c__Saccharomycetes	o__Saccharomycetales	f__Debaryomycetaceae	g__Meyerozyma	s__Meyerozyma_guilliermondii
OTU164	MOSTABUND|n=4/2	2	1	1
OTU165	MOSTABUND|n=4/2	1	2	1	MF976761	SH0905231.10FU	2.83511e-063	244.878	132	1	156	398	554	149	149	95.5	100	156	k__Fungi	p__Fungi_phy_Incertae_sedis	c__Fungi_cls_Incertae_sedis	o__Fungi_ord_Incertae_sedis	f__Fungi_fam_Incertae_sedis	g__Fungi_gen_Incertae_sedis	s__Fungi_sp
OTU166	MOSTABUND|n=4/1	1	1	2
OTU167	MOSTABUND|n=4/3	2	0	2	OQ526191	SH1020519.10FU	1.75527e-040	169.165	91	3	144	372	514	127	127	89.4	91	156	k__Fungi	p__Ascomycota	c__Dothideomycetes	o__Dothideomycetes_ord_Incertae_sedis	f__Dothideomycetes_fam_Incertae_sedis	g__Dothideomycetes_gen_Incertae_sedis	s__Dothideomycetes_sp
OTU168	MOSTABUND|n=4/3	2	0	2	OR623243	SH0958738.10FU	1.74869e-080	302.124	163	1	163	289	451	163	163	100	100	163	k__Fungi	p__Ascomycota	c__Saccharomycetes	o__Saccharomycetales	f__Trichomonascaceae	g__Blastobotrys	s__Blastobotrys_sp
OTU169	MOSTABUND|n=4/2	3	1	0	OR778324	SH0974277.10FU	2.22881e-079	298.431	161	1	161	385	545	161	161	100	100	161	k__Fungi	p__Ascomycota	c__Pezizomycetes	o__Pezizales	f__Pyronemataceae	g__Pyronema	s__Pyronema_sp
OTU170	MOSTABUND|n=4/3	2	1	1
OTU171	MOSTABUND|n=4/1	4	0	0	FM173097	SH0974823.10FU	2.09177e-090	335.364	181	1	191	359	548	188	188	98.4	99.5	192	k__Fungi	p__Ascomycota	c__Eurotiomycetes	o__Chaetothyriales	f__Herpotrichiellaceae	g__Exophiala	s__Exophiala_sp
OTU172	MOSTABUND|n=4/1	1	2	1	UDB04263802	SH0767731.10FU	2.92529e-073	278.118	150	1	162	333	495	159	159	98.1	100	162	k__Fungi	p__Ascomycota	c__Eurotiomycetes	o__Eurotiales	f__Aspergillaceae	g__Penicillium	s__Penicillium_sp
OTU173	MOSTABUND|n=4/1	1	2	1	OR069551	SH0767731.10FU	1.76111e-075	285.504	154	1	163	331	493	161	161	98.8	100	163	k__Fungi	p__Ascomycota	c__Eurotiomycetes	o__Eurotiales	f__Aspergillaceae	g__Penicillium	s__Penicillium_corylophilum
OTU174	MOSTABUND|n=4/3	1	2	1	UDB03126426	SH0966817.10FU	9.10463e-068	259.651	140	1	143	327	469	142	142	99.3	100	143	k__Fungi	p__Ascomycota	c__Leotiomycetes	o__Leotiales	f__Tympanidaceae	g__Claussenomyces	s__Claussenomyces_sp
OTU175	MOSTABUND|n=4/2	3	1	0	OR885094	SH1025978.10FU	3.84148e-082	307.664	166	1	166	435	600	166	166	100	100	166	k__Fungi	p__Ascomycota	c__Sordariomycetes	o__Hypocreales	f__Hypocreaceae	g__Trichoderma	s__Trichoderma_euskadiense
OTU176	MOSTABUND|n=4/1	0	2	2	KM014588	SH0964652.10FU	2.81707e-094	348.29	188	1	200	283	483	197	197	98.5	100	200	k__Fungi	p__Basidiomycota	c__Cystobasidiomycetes	o__Cystobasidiales	f__Cystobasidiaceae	g__Cystobasidium	s__Cystobasidium_minutum
OTU177	MOSTABUND|n=4/1	2	0	2	UDB07674985	SH1012176.10FU	6.97763e-069	263.345	142	1	142	317	458	142	142	100	100	142	k__Fungi	p__Ascomycota	c__Leotiomycetes	o__Helotiales	f__Pezizellaceae	g__Ciliolarina	s__Ciliolarina_sp
OTU178	MOSTABUND|n=3/1	2	1	0	KY102579	SH0733965.10FU	7.65077e-071	270.731	146	1	235	369	600	207	207	88.1	98.7	238	k__Fungi	p__Basidiomycota	c__Microbotryomycetes	o__Microbotryomycetes_ord_Incertae_sedis	f__Colacogloeaceae	g__Colacogloea	s__Colacogloea_terpenoidalis
OTU179	MOSTABUND|n=3/1	3	0	0	UDB07378601	SH0745575.10FU	1.19475e-093	346.444	187	1	231	387	619	218	218	94.4	100	231	k__Fungi	p__Chytridiomycota	c__Spizellomycetes	o__Spizellomycetales	f__Spizellomycetaceae	g__Spizellomycetaceae_gen_Incertae_sedis	s__Spizellomycetaceae_sp
OTU180	MOSTABUND|n=3/1	0	0	3	UDB01773080	SH0961639.10FU	4.85878e-071	270.731	146	1	161	354	514	156	156	96.9	100	161	k__Fungi	p__Ascomycota	c__Eurotiomycetes	o__Chaetothyriales	f__Chaetothyriales_fam_Incertae_sedis	g__Chaetothyriales_gen_Incertae_sedis	s__Chaetothyriales_sp
OTU181	MOSTABUND|n=3/2	1	1	1	UDB04100206	SH0939722.10FU	4.9313e-071	270.731	146	1	158	335	492	155	155	98.1	96.9	163	k__Fungi	p__Ascomycota	c__Eurotiomycetes	o__Eurotiales	f__Aspergillaceae	g__Penicillium	s__Penicillium_sp
OTU182	MOSTABUND|n=3/1	0	0	3	UDB04121108	SH0905534.10FU	6.99324e-060	233.798	126	1	174	367	535	160	160	92	100	174	k__Fungi	p__Ascomycota	c__Dothideomycetes	o__Coniosporiales	f__Coniosporiaceae	g__Coniosporium	s__Coniosporium_sp
OTU183	MOSTABUND|n=3/1	2	0	1	UDB05377383	SH0949870.10FU	2.56083e-090	335.364	181	3	229	300	524	212	212	93.4	99.1	229	k__Fungi	p__Basidiomycota	c__Cystobasidiomycetes	o__Erythrobasidiales	f__Erythrobasidiales_fam_Incertae_sedis	g__Erythrobasidiales_gen_Incertae_sedis	s__Erythrobasidiales_sp
OTU184	MOSTABUND|n=3/1	0	0	3	AJ972856	SH0983459.10FU	7.02717e-064	246.725	133	1	142	2039	2180	139	139	97.9	100	142	k__Fungi	p__Ascomycota	c__Dothideomycetes	o__Mycosphaerellales	f__Extremaceae	g__Extremaceae_gen_Incertae_sedis	s__Extremaceae_sp
OTU185	MOSTABUND|n=3/1	0	2	1	UDB0995635	SH0856386.10FU	1.01375e-077	292.891	158	1	158	323	480	158	158	100	100	158	k__Fungi	p__Ascomycota	c__Dothideomycetes	o__Pleosporales	f__Pleosporaceae	g__Alternaria	s__Alternaria_sp
OTU186	MOSTABUND|n=3/1	3	0	0
OTU187	MOSTABUND|n=3/1	2	1	0	OP886682	SH0931161.10FU	2.00752e-069	265.191	143	1	146	935	1080	145	145	99.3	100	146	k__Fungi	p__Ascomycota	c__Leotiomycetes	o__Leotiales	f__Tympanidaceae	g__Pragmopora	s__Pragmopora_pini
OTU188	MOSTABUND|n=3/1	3	0	0	MT872624	SH0912804.10FU	1.68724e-040	169.165	91	1	125	578	701	114	114	91.2	82.8	151	k__Fungi	p__Ascomycota	c__Eurotiomycetes	o__Eurotiomycetes_ord_Incertae_sedis	f__Eurotiomycetes_fam_Incertae_sedis	g__Eurotiomycetes_gen_Incertae_sedis	s__Eurotiomycetes_sp
OTU189	MOSTABUND|n=3/2	1	0	2	FJ028703	SH0763640.10FU	7.65141e-074	279.964	151	1	154	326	479	153	153	99.4	100	154	k__Fungi	p__Ascomycota	c__Dothideomycetes	o__Capnodiales	f__Capnodiales_fam_Incertae_sedis	g__Capnodiales_gen_Incertae_sedis	s__Capnodiales_sp
OTU190	MOSTABUND|n=3/1	0	0	3	UDB07674985	SH1012176.10FU	1.18791e-066	255.958	138	1	144	315	458	142	142	98.6	100	144	k__Fungi	p__Ascomycota	c__Leotiomycetes	o__Helotiales	f__Pezizellaceae	g__Ciliolarina	s__Ciliolarina_sp
OTU191	MOSTABUND|n=3/1	0	2	1	UDB02013834	SH0904555.10FU	2.19872e-080	302.124	163	1	195	361	557	187	187	95.9	98.5	198	k__Fungi	p__Ascomycota	c__Eurotiomycetes	o__Chaetothyriales	f__Herpotrichiellaceae	g__Exophiala	s__Exophiala_sp
OTU192	MOSTABUND|n=3/1	1	0	2	MK782301	SH0850121.10FU	1.70378e-050	202.405	109	1	154	323	488	149	149	96.8	100	154	k__Fungi	p__Ascomycota	c__Saccharomycetes	o__Saccharomycetales	f__Saccharomycetales_fam_Incertae_sedis	g__Saccharomycetales_gen_Incertae_sedis	s__Saccharomycetales_sp
OTU193	MOSTABUND|n=2/1	1	0	1	AJ972850	SH0763614.10FU	5.98886e-055	217.178	117	1	146	350	497	139	139	95.2	96.1	152	k__Fungi	p__Ascomycota	c__Dothideomycetes	o__Mycosphaerellales	f__Teratosphaeriaceae	g__Capnobotryella	s__Capnobotryella_sp
OTU194	MOSTABUND|n=2/1	0	0	2	UDB01571240	SH0947752.10FU	2.25658e-090	335.364	181	1	205	296	500	198	198	96.6	100	205	k__Fungi	p__Basidiomycota	c__Cystobasidiomycetes	o__Buckleyzymales	f__Buckleyzymaceae	g__Buckleyzyma	s__Buckleyzyma_sp
OTU195	MOSTABUND|n=2/1	0	2	0	UDB02410273	SH0971208.10FU	3.47559e-093	344.597	186	1	192	317	508	190	190	99	100	192	k__Fungi	p__Basidiomycota	c__Agaricomycetes	o__Cantharellales	f__Oliveoniaceae	g__Oliveonia	s__Oliveonia_sp
OTU196	MOSTABUND|n=2/1	0	0	2	MT809280	SH0737869.10FU	9.88951e-068	259.651	140	1	152	350	501	148	148	97.4	99.3	153	k__Fungi	p__Ascomycota	c__Sareomycetes	o__Sareales	f__Sareaceae	g__Sarea	s__Sarea_sp
OTU197	MOSTABUND|n=2/1	1	0	1	LC639279	SH0946103.10FU	1.15544e-061	239.338	129	1	135	370	504	133	133	98.5	96.4	140	k__Fungi	p__Ascomycota	c__Leotiomycetes	o__Helotiales	f__Myxotrichaceae	g__Oidiodendron	s__Oidiodendron_griseum
OTU198	MOSTABUND|n=2/1	1	0	1	UDB03609281	SH1012176.10FU	2.55325e-068	261.498	141	1	144	317	460	143	143	99.3	100	144	k__Fungi	p__Ascomycota	c__Leotiomycetes	o__Helotiales	f__Helotiales_fam_Incertae_sedis	g__Infundichalara	s__Infundichalara_sp
OTU199	MOSTABUND|n=2/1	0	0	2	UDB01886795	SH0958714.10FU	8.94791e-025	117.459	63	4	160	299	448	130	130	82.8	76.2	206	k__Fungi	p__Basidiomycota	c__Agaricostilbomycetes	o__Agaricostilbales	f__Chionosphaeraceae	g__Chionosphaeraceae_gen_Incertae_sedis	s__Chionosphaeraceae_sp
OTU200	MOSTABUND|n=2/1	1	0	1	MT872626	SH0912803.10FU	2.72783e-068	261.498	141	1	151	1577	1726	148	148	98	99.3	152	k__Fungi	p__Ascomycota	c__Eurotiomycetes	o__Eurotiomycetes_ord_Incertae_sedis	f__Eurotiomycetes_fam_Incertae_sedis	g__Eurotiomycetes_gen_Incertae_sedis	s__Eurotiomycetes_sp
OTU201	MOSTABUND|n=2/1	1	0	1	UDB03689247	SH0821637.10FU	1.26019e-071	272.578	147	3	152	374	523	149	149	99.3	98.7	152	k__Fungi	p__Ascomycota	c__Dothideomycetes	o__Pleosporales	f__Phaeosphaeriaceae	g__Paraphoma	s__Paraphoma_sp
OTU202	MOSTABUND|n=2/1	1	0	1	OR415647	SH0740357.10FU	7.95641e-079	296.584	160	1	160	394	553	160	160	100	100	160	k__Fungi	p__Ascomycota	c__Sordariomycetes	o__Hypocreales	f__Cordycipitaceae	g__Akanthomyces	s__Akanthomyces_lecanii
OTU203	MOSTABUND|n=2/1	2	0	0	MK163843	SH0881750.10FU	5.48785e-070	267.038	144	1	144	325	468	144	144	100	100	144	k__Fungi	p__Ascomycota	c__Leotiomycetes	o__Thelebolales	f__Pseudeurotiaceae	g__Pseudeurotium	s__Pseudeurotium_sp
OTU204	MOSTABUND|n=2/1	0	2	0	UDB07491230	SH1012233.10FU	7.15966e-069	263.345	142	1	145	315	459	144	144	99.3	100	145	k__Fungi	p__Ascomycota	c__Leotiomycetes	o__Helotiales	f__Dermateaceae	g__Xenochalara	s__Xenochalara_sp
OTU205	MOSTABUND|n=2/1	0	0	2	KU948765	SH0845488.10FU	1.35331e-057	226.412	122	1	182	261	442	164	164	90.1	92.4	197	k__Fungi	p__Basidiomycota	c__Cystobasidiomycetes	o__Cystobasidiomycetes_ord_Incertae_sedis	f__Cystobasidiomycetes_fam_Incertae_sedis	g__Cystobasidiomycetes_gen_Incertae_sedis	s__Cystobasidiomycetes_sp
OTU206	MOSTABUND|n=2/1	2	0	0	UDB07674985	SH1012176.10FU	1.18791e-066	255.958	138	1	144	315	458	142	142	98.6	100	144	k__Fungi	p__Ascomycota	c__Leotiomycetes	o__Helotiales	f__Pezizellaceae	g__Ciliolarina	s__Ciliolarina_sp
OTU207	MOSTABUND|n=2/1	1	1	0
OTU208	MOSTABUND|n=2/1	0	2	0	FM173097	SH0974823.10FU	4.62024e-077	291.044	157	1	191	359	548	181	181	94.8	99	193	k__Fungi	p__Ascomycota	c__Eurotiomycetes	o__Chaetothyriales	f__Herpotrichiellaceae	g__Exophiala	s__Exophiala_sp
OTU209	MOSTABUND|n=2/1	2	0	0	OP045988	SH0880566.10FU	5.31286e-117	424.003	229	1	229	341	569	229	229	100	100	229	k__Fungi	p__Basidiomycota	c__Microbotryomycetes	o__Microbotryomycetes_ord_Incertae_sedis	f__Colacogloeaceae	g__Colacogloea	s__Colacogloea_sp
OTU210	MOSTABUND|n=2/1	0	0	2	OQ600167	SH0897344.10FU	2.00752e-069	265.191	143	1	146	335	480	145	145	99.3	100	146	k__Fungi	p__Ascomycota	c__Leotiomycetes	o__Thelebolales	f__Pseudeurotiaceae	g__Beskidomyces	s__Beskidomyces_laricis
OTU211	MOSTABUND|n=2/2	0	1	1	MT872626	SH0912803.10FU	2.15191e-049	198.712	107	1	151	1577	1729	138	138	91.4	100	151	k__Fungi	p__Ascomycota	c__Eurotiomycetes	o__Eurotiomycetes_ord_Incertae_sedis	f__Eurotiomycetes_fam_Incertae_sedis	g__Eurotiomycetes_gen_Incertae_sedis	s__Eurotiomycetes_sp
OTU212	MOSTABUND|n=2/1	1	0	1	OR633246	SH0939673.10FU	1.01375e-077	292.891	158	1	158	441	598	158	158	100	100	158	k__Fungi	p__Ascomycota	c__Eurotiomycetes	o__Eurotiales	f__Aspergillaceae	g__Penicillium	s__Penicillium_glabrum
OTU213	MOSTABUND|n=2/1	1	0	1	UDB06512388	SH0980336.10FU	7.24976e-090	333.517	180	1	186	351	536	184	184	98.9	100	186	k__Fungi	p__Mucoromycota	c__Mucoromycetes	o__Mucorales	f__Rhizopodaceae	g__Rhizopus	s__Rhizopus_sp
OTU214	MOSTABUND|n=2/1	0	1	1	KU580197	SH1015351.10FU	4.30282e-061	237.491	128	1	144	358	499	139	139	96.5	100	144	k__Fungi	p__Fungi_phy_Incertae_sedis	c__Fungi_cls_Incertae_sedis	o__Fungi_ord_Incertae_sedis	f__Fungi_fam_Incertae_sedis	g__Fungi_gen_Incertae_sedis	s__Fungi_sp
OTU215	MOSTABUND|n=2/1	0	0	2	UDB07499237	SH1012135.10FU	7.21049e-064	246.725	133	1	142	317	458	139	139	97.9	97.9	145	k__Fungi	p__Ascomycota	c__Leotiomycetes	o__Helotiales	f__Pezizellaceae	g__Xenopolyscytalum	s__Xenopolyscytalum_sp
OTU216	MOSTABUND|n=2/2	1	1	0	UDB06914778	SH0946025.10FU	1.23413e-051	206.098	111	1	143	319	464	135	135	94.4	97.9	146	k__Fungi	p__Ascomycota	c__Leotiomycetes	o__Leotiales	f__Tympanidaceae	g__Tympanidaceae_gen_Incertae_sedis	s__Tympanidaceae_sp
OTU217	MOSTABUND|n=2/1	0	0	2	OQ422967	SH0743871.10FU	6.14778e-075	283.658	153	1	159	325	483	157	157	98.7	100	159	k__Fungi	p__Basidiomycota	c__Tremellomycetes	o__Tremellales	f__Naemateliaceae	g__Naematelia	s__Naematelia_encephala
OTU218	MOSTABUND|n=2/1	0	1	1	GU062229	SH0926075.10FU	4.73739e-118	427.696	231	1	256	307	561	248	248	96.9	98.5	260	k__Fungi	p__Basidiomycota	c__Basidiomycota_cls_Incertae_sedis	o__Basidiomycota_ord_Incertae_sedis	f__Basidiomycota_fam_Incertae_sedis	g__Basidiomycota_gen_Incertae_sedis	s__Basidiomycota_sp
OTU219	MOSTABUND|n=2/1	1	0	1	OR752067	SH0940075.10FU	2.27814e-074	281.811	152	1	163	364	528	161	161	98.8	100	163	k__Fungi	p__Ascomycota	c__Eurotiomycetes	o__Eurotiales	f__Aspergillaceae	g__Aspergillus	s__Aspergillus_fumigatus
OTU220	MOSTABUND|n=2/1	0	0	2	OM337573	SH0849718.10FU	1.76111e-075	285.504	154	1	163	538	700	160	160	98.2	100	163	k__Fungi	p__Ascomycota	c__Dothideomycetes	o__Mytilinidiales	f__Mytilinidiaceae	g__Mytilinidion	s__Mytilinidion_resinicola
OTU221	MOSTABUND|n=2/1	2	0	0	OR800251	SH0862152.10FU	2.14413e-074	281.811	152	1	155	331	485	154	154	99.4	100	155	k__Fungi	p__Ascomycota	c__Dothideomycetes	o__Pleosporales	f__Didymellaceae	g__Epicoccum	s__Epicoccum_sp
OTU222	MOSTABUND|n=2/2	0	1	1	OR069631	SH0972258.10FU	6.97763e-069	263.345	142	1	142	303	444	142	142	100	100	142	k__Fungi	p__Ascomycota	c__Dothideomycetes	o__Dothideales	f__Dothideaceae	g__Sydowia	s__Sydowia_polyspora
OTU223	MOSTABUND|n=2/1	0	1	1	OR760519	SH0962330.10FU	7.34168e-069	263.345	142	1	148	329	476	146	146	98.6	100	148	k__Fungi	p__Ascomycota	c__Dothideomycetes	o__Cladosporiales	f__Cladosporiaceae	g__Cladosporium	s__Cladosporium_allicinum
OTU224	MOSTABUND|n=2/1	0	2	0	UDB05026986	SH0754434.10FU	6.08468e-055	217.178	117	1	153	343	502	147	147	96.1	99.4	154	k__Fungi	p__Ascomycota	c__Sordariomycetes	o__Diaporthales	f__Cytosporaceae	g__Cytospora	s__Cytospora_sp
OTU225	MOSTABUND|n=2/1	0	2	0	UDB04270653	SH0939727.10FU	2.24464e-074	281.811	152	1	161	332	493	160	160	99.4	100	161	k__Fungi	p__Ascomycota	c__Eurotiomycetes	o__Eurotiales	f__Aspergillaceae	g__Penicillium	s__Penicillium_sp
OTU226	MOSTABUND|n=2/1	1	1	0	MT872626	SH0912803.10FU	2.10672e-064	248.571	134	1	151	1577	1729	147	147	97.4	100	151	k__Fungi	p__Ascomycota	c__Eurotiomycetes	o__Eurotiomycetes_ord_Incertae_sedis	f__Eurotiomycetes_fam_Incertae_sedis	g__Eurotiomycetes_gen_Incertae_sedis	s__Eurotiomycetes_sp
OTU227	MOSTABUND|n=2/1	0	1	1	UDB03609281	SH1012176.10FU	5.52681e-065	250.418	135	1	144	317	460	141	141	97.9	100	144	k__Fungi	p__Ascomycota	c__Leotiomycetes	o__Helotiales	f__Helotiales_fam_Incertae_sedis	g__Infundichalara	s__Infundichalara_sp
OTU228	MOSTABUND|n=2/1	2	0	0	KM104151	SH0907363.10FU	4.86265e-102	374.144	202	1	205	390	594	204	204	99.5	98.6	208	k__Fungi	p__Fungi_phy_Incertae_sedis	c__Fungi_cls_Incertae_sedis	o__Fungi_ord_Incertae_sedis	f__Fungi_fam_Incertae_sedis	g__Fungi_gen_Incertae_sedis	s__Fungi_sp
OTU229	MOSTABUND|n=2/1	1	0	1	MT813950	SH0950131.10FU	4.78373e-066	254.111	137	1	153	217	368	148	148	96.7	96.8	158	k__Fungi	p__Ascomycota	c__Xylonomycetes	o__Symbiotaphrinales	f__Symbiotaphrinaceae	g__Symbiotaphrina	s__Symbiotaphrina_microtheca
OTU230	MOSTABUND|n=2/1	0	2	0	OK050801	SH0877606.10FU	2.40349e-065	252.265	136	1	203	319	519	181	181	89.2	96.7	210	k__Fungi	p__Basidiomycota	c__Microbotryomycetes	o__Sporidiobolales	f__Sporidiobolaceae	g__Rhodosporidiobolus	s__Rhodosporidiobolus_poonsookiae
OTU231	MOSTABUND|n=2/1	0	1	1	UDB04173865	SH0927678.10FU	4.88463e-087	324.284	175	1	205	308	512	195	195	95.1	100	205	k__Fungi	p__Basidiomycota	c__Microbotryomycetes	o__Microbotryomycetes_ord_Incertae_sedis	f__Microbotryomycetes_fam_Incertae_sedis	g__Microbotryomycetes_gen_Incertae_sedis	s__Microbotryomycetes_sp
OTU232	MOSTABUND|n=2/1	1	0	1	AM901832	SH0934681.10FU	6.84627e-101	370.45	200	1	224	539	762	216	216	96.4	100	224	k__Fungi	p__Basidiomycota	c__Exobasidiomycetes	o__Exobasidiales	f__Exobasidiaceae	g__Exobasidium	s__Exobasidium_sp
OTU233	MOSTABUND|n=2/1	0	0	2	JN032542	SH0828390.10FU	2.29183e-054	215.332	116	1	158	401	559	145	145	91.8	98.8	160	k__Fungi	p__Ascomycota	c__Eurotiomycetes	o__Chaetothyriales	f__Chaetothyriales_fam_Incertae_sedis	g__Chaetothyriales_gen_Incertae_sedis	s__Chaetothyriales_sp
OTU234	MOSTABUND|n=2/1	0	0	2	MT872624	SH0912804.10FU	1.28328e-041	172.859	93	1	149	578	729	133	133	89.3	100	149	k__Fungi	p__Ascomycota	c__Eurotiomycetes	o__Eurotiomycetes_ord_Incertae_sedis	f__Eurotiomycetes_fam_Incertae_sedis	g__Eurotiomycetes_gen_Incertae_sedis	s__Eurotiomycetes_sp
OTU235	MOSTABUND|n=2/1	0	0	2	OR633242	SH0939544.10FU	1.74869e-080	302.124	163	1	163	466	628	163	163	100	100	163	k__Fungi	p__Ascomycota	c__Eurotiomycetes	o__Eurotiales	f__Aspergillaceae	g__Penicillium	s__Penicillium_hirsutum
OTU236	SINGLETON|n=1	1	0	0	UDB02024784	SH0763677.10FU	7.21049e-064	246.725	133	1	136	322	457	135	135	99.3	93.8	145	k__Fungi	p__Ascomycota	c__Dothideomycetes	o__Mycosphaerellales	f__Neodevriesiaceae	g__Neodevriesia	s__Neodevriesia_sp
OTU237	SINGLETON|n=1	1	0	0	KY087605	SH0878054.10FU	8.43261e-064	246.725	133	1	165	224	390	156	156	94.5	100	165	k__Fungi	p__Ascomycota	c__Eurotiomycetes	o__Eurotiales	f__Aspergillaceae	g__Aspergillus	s__Aspergillus_domesticus
OTU238	SINGLETON|n=1	1	0	0
OTU239	SINGLETON|n=1	1	0	0	MT872626	SH0912803.10FU	2.10672e-064	248.571	134	1	151	1577	1729	147	147	97.4	100	151	k__Fungi	p__Ascomycota	c__Eurotiomycetes	o__Eurotiomycetes_ord_Incertae_sedis	f__Eurotiomycetes_fam_Incertae_sedis	g__Eurotiomycetes_gen_Incertae_sedis	s__Eurotiomycetes_sp
OTU240	SINGLETON|n=1	1	0	0	EU030275	SH0828639.10FU	1.7862e-065	252.265	136	1	160	334	493	152	152	95	98.2	163	k__Fungi	p__Ascomycota	c__Eurotiomycetes	o__Chaetothyriales	f__Herpotrichiellaceae	g__Sorocybe	s__Sorocybe_resinae
OTU241	SINGLETON|n=1	1	0	0
OTU242	SINGLETON|n=1	1	0	0
OTU243	SINGLETON|n=1	1	0	0	EU030275	SH0828639.10FU	1.7862e-065	252.265	136	1	160	334	493	152	152	95	98.2	163	k__Fungi	p__Ascomycota	c__Eurotiomycetes	o__Chaetothyriales	f__Herpotrichiellaceae	g__Sorocybe	s__Sorocybe_resinae
OTU244	SINGLETON|n=1	1	0	0	UDB01788742	SH0961637.10FU	6.24317e-080	300.278	162	1	162	351	512	162	162	100	100	162	k__Fungi	p__Ascomycota	c__Eurotiomycetes	o__Chaetothyriales	f__Chaetothyriales_fam_Incertae_sedis	g__Chaetothyriales_gen_Incertae_sedis	s__Chaetothyriales_sp
OTU245	SINGLETON|n=1	1	0	0	MW842891	SH0801445.10FU	2.14413e-074	281.811	152	1	155	337	491	154	154	99.4	100	155	k__Fungi	p__Fungi_phy_Incertae_sedis	c__Fungi_cls_Incertae_sedis	o__Fungi_ord_Incertae_sedis	f__Fungi_fam_Incertae_sedis	g__Fungi_gen_Incertae_sedis	s__Fungi_sp
OTU246	SINGLETON|n=1	1	0	0	OK584507	SH1012176.10FU	7.21049e-064	246.725	133	1	145	381	525	141	141	97.2	100	145	k__Fungi	p__Ascomycota	c__Leotiomycetes	o__Helotiales	f__Helotiales_fam_Incertae_sedis	g__Infundichalara	s__Infundichalara_sp
OTU247	SINGLETON|n=1	1	0	0	EU030275	SH0828639.10FU	3.83919e-067	257.805	139	1	160	334	493	153	153	95.6	98.2	163	k__Fungi	p__Ascomycota	c__Eurotiomycetes	o__Chaetothyriales	f__Herpotrichiellaceae	g__Sorocybe	s__Sorocybe_resinae
OTU248	SINGLETON|n=1	1	0	0	UDB03955738	SH0939707.10FU	1.04433e-072	276.271	149	1	161	331	492	158	158	98.1	100	161	k__Fungi	p__Ascomycota	c__Eurotiomycetes	o__Eurotiales	f__Aspergillaceae	g__Penicillium	s__Penicillium_sp
OTU249	SINGLETON|n=1	1	0	0	OR069551	SH0767731.10FU	2.94606e-068	261.498	141	1	162	331	493	156	156	96.3	100	162	k__Fungi	p__Ascomycota	c__Eurotiomycetes	o__Eurotiales	f__Aspergillaceae	g__Penicillium	s__Penicillium_corylophilum
OTU250	SINGLETON|n=1	1	0	0	MZ016618	SH0976976.10FU	9.02894e-084	313.204	169	1	179	360	537	176	176	98.3	100	179	k__Fungi	p__Fungi_phy_Incertae_sedis	c__Fungi_cls_Incertae_sedis	o__Fungi_ord_Incertae_sedis	f__Fungi_fam_Incertae_sedis	g__Fungi_gen_Incertae_sedis	s__Fungi_sp
OTU251	SINGLETON|n=1	1	0	0	UDB03795961	SH0767731.10FU	1.39125e-071	272.578	147	1	165	332	496	159	159	96.4	100	165	k__Fungi	p__Ascomycota	c__Eurotiomycetes	o__Eurotiales	f__Aspergillaceae	g__Penicillium	s__Penicillium_sp
OTU252	SINGLETON|n=1	1	0	0	OK039352	SH0844762.10FU	1.86676e-051	206.098	111	1	204	269	473	175	175	85.8	98.6	207	k__Fungi	p__Basidiomycota	c__Cystobasidiomycetes	o__Naohideales	f__Naohideaceae	g__Naohidea	s__Naohidea_sebacea
OTU253	SINGLETON|n=1	1	0	0	MT872624	SH0912804.10FU	9.88068e-063	243.031	131	1	152	578	729	145	145	95.4	100	152	k__Fungi	p__Ascomycota	c__Eurotiomycetes	o__Eurotiomycetes_ord_Incertae_sedis	f__Eurotiomycetes_fam_Incertae_sedis	g__Eurotiomycetes_gen_Incertae_sedis	s__Eurotiomycetes_sp
OTU254	SINGLETON|n=1	1	0	0	EU030275	SH0828639.10FU	8.25181e-069	263.345	142	1	160	334	493	154	154	96.3	98.2	163	k__Fungi	p__Ascomycota	c__Eurotiomycetes	o__Chaetothyriales	f__Herpotrichiellaceae	g__Sorocybe	s__Sorocybe_resinae
OTU255	SINGLETON|n=1	1	0	0	MT813950	SH0950131.10FU	2.92164e-058	228.258	123	3	156	219	371	144	144	93.5	96.9	159	k__Fungi	p__Ascomycota	c__Xylonomycetes	o__Symbiotaphrinales	f__Symbiotaphrinaceae	g__Symbiotaphrina	s__Symbiotaphrina_microtheca
OTU256	SINGLETON|n=1	1	0	0	UDB01441599	SH0878054.10FU	1.79996e-075	285.504	154	1	166	343	509	163	163	98.2	100	166	k__Fungi	p__Ascomycota	c__Eurotiomycetes	o__Eurotiales	f__Aspergillaceae	g__Aspergillus	s__Aspergillus_sp
OTU257	SINGLETON|n=1	1	0	0	OQ102311	SH0762231.10FU	9.61409e-089	329.824	178	1	190	358	548	187	187	98.4	100	190	k__Fungi	p__Basidiomycota	c__Agaricomycetes	o__Polyporales	f__Polyporaceae	g__Trametes	s__Trametes_versicolor
OTU258	SINGLETON|n=1	1	0	0	GU062229	SH0926075.10FU	1.7086e-112	409.23	221	1	255	308	561	244	244	95.7	98.5	259	k__Fungi	p__Basidiomycota	c__Basidiomycota_cls_Incertae_sedis	o__Basidiomycota_ord_Incertae_sedis	f__Basidiomycota_fam_Incertae_sedis	g__Basidiomycota_gen_Incertae_sedis	s__Basidiomycota_sp
OTU259	SINGLETON|n=1	1	0	0
OTU260	SINGLETON|n=1	1	0	0	KX148023	SH0938147.10FU	4.53245e-071	270.731	146	1	152	321	472	150	150	98.7	100	152	k__Fungi	p__Ascomycota	c__Dothideomycetes	o__Mycosphaerellales	f__Teratosphaeriaceae	g__Constantinomyces	s__Constantinomyces_sp
OTU261	SINGLETON|n=1	1	0	0	OK584507	SH1012176.10FU	7.21049e-064	246.725	133	1	145	381	525	141	141	97.2	100	145	k__Fungi	p__Ascomycota	c__Leotiomycetes	o__Helotiales	f__Helotiales_fam_Incertae_sedis	g__Infundichalara	s__Infundichalara_sp
OTU262	SINGLETON|n=1	1	0	0	MT872624	SH0912804.10FU	3.50044e-067	257.805	139	1	151	578	729	148	148	98	100	151	k__Fungi	p__Ascomycota	c__Eurotiomycetes	o__Eurotiomycetes_ord_Incertae_sedis	f__Eurotiomycetes_fam_Incertae_sedis	g__Eurotiomycetes_gen_Incertae_sedis	s__Eurotiomycetes_sp
OTU263	SINGLETON|n=1	1	0	0	GU062229	SH0926075.10FU	2.79462e-120	435.083	235	1	253	308	561	248	248	98	98.4	257	k__Fungi	p__Basidiomycota	c__Basidiomycota_cls_Incertae_sedis	o__Basidiomycota_ord_Incertae_sedis	f__Basidiomycota_fam_Incertae_sedis	g__Basidiomycota_gen_Incertae_sedis	s__Basidiomycota_sp
OTU264	SINGLETON|n=1	1	0	0	GU062229	SH0926075.10FU	1.68924e-117	425.85	230	1	254	308	561	246	246	96.9	98.4	258	k__Fungi	p__Basidiomycota	c__Basidiomycota_cls_Incertae_sedis	o__Basidiomycota_ord_Incertae_sedis	f__Basidiomycota_fam_Incertae_sedis	g__Basidiomycota_gen_Incertae_sedis	s__Basidiomycota_sp
OTU265	SINGLETON|n=1	1	0	0	GU062229	SH0926075.10FU	2.2355e-106	388.917	210	1	256	308	561	241	241	94.1	98.5	260	k__Fungi	p__Basidiomycota	c__Basidiomycota_cls_Incertae_sedis	o__Basidiomycota_ord_Incertae_sedis	f__Basidiomycota_fam_Incertae_sedis	g__Basidiomycota_gen_Incertae_sedis	s__Basidiomycota_sp
OTU266	SINGLETON|n=1	1	0	0	GU062229	SH0926075.10FU	7.8933e-116	420.31	227	1	255	308	561	246	246	96.5	98.5	259	k__Fungi	p__Basidiomycota	c__Basidiomycota_cls_Incertae_sedis	o__Basidiomycota_ord_Incertae_sedis	f__Basidiomycota_fam_Incertae_sedis	g__Basidiomycota_gen_Incertae_sedis	s__Basidiomycota_sp
OTU267	SINGLETON|n=1	1	0	0	GU062229	SH0926075.10FU	3.6724e-114	414.77	224	1	255	308	561	245	245	96.1	98.5	259	k__Fungi	p__Basidiomycota	c__Basidiomycota_cls_Incertae_sedis	o__Basidiomycota_ord_Incertae_sedis	f__Basidiomycota_fam_Incertae_sedis	g__Basidiomycota_gen_Incertae_sedis	s__Basidiomycota_sp
OTU268	SINGLETON|n=1	1	0	0	GU062229	SH0926075.10FU	1.69655e-117	425.85	230	1	255	308	561	247	247	96.9	98.5	259	k__Fungi	p__Basidiomycota	c__Basidiomycota_cls_Incertae_sedis	o__Basidiomycota_ord_Incertae_sedis	f__Basidiomycota_fam_Incertae_sedis	g__Basidiomycota_gen_Incertae_sedis	s__Basidiomycota_sp
OTU269	SINGLETON|n=1	1	0	0	LC272919	SH0915560.10FU	3.83802e-062	241.185	130	1	162	362	525	153	153	94.4	100	162	k__Fungi	p__Ascomycota	c__Dothideomycetes	o__Myriangiales	f__Myriangiales_fam_Incertae_sedis	g__Myriangiales_gen_Incertae_sedis	s__Myriangiales_sp
OTU270	SINGLETON|n=1	1	0	0	GU062229	SH0926075.10FU	3.64651e-119	431.39	233	1	255	308	561	248	248	97.3	98.5	259	k__Fungi	p__Basidiomycota	c__Basidiomycota_cls_Incertae_sedis	o__Basidiomycota_ord_Incertae_sedis	f__Basidiomycota_fam_Incertae_sedis	g__Basidiomycota_gen_Incertae_sedis	s__Basidiomycota_sp
OTU271	SINGLETON|n=1	1	0	0	GU062229	SH0926075.10FU	1.7086e-112	409.23	221	1	255	308	561	244	244	95.7	98.5	259	k__Fungi	p__Basidiomycota	c__Basidiomycota_cls_Incertae_sedis	o__Basidiomycota_ord_Incertae_sedis	f__Basidiomycota_fam_Incertae_sedis	g__Basidiomycota_gen_Incertae_sedis	s__Basidiomycota_sp
OTU272	SINGLETON|n=1	1	0	0	GU062229	SH0926075.10FU	1.31874e-108	396.303	214	1	253	308	561	242	242	95.7	98.4	257	k__Fungi	p__Basidiomycota	c__Basidiomycota_cls_Incertae_sedis	o__Basidiomycota_ord_Incertae_sedis	f__Basidiomycota_fam_Incertae_sedis	g__Basidiomycota_gen_Incertae_sedis	s__Basidiomycota_sp
OTU273	SINGLETON|n=1	1	0	0	GU062229	SH0926075.10FU	3.64651e-119	431.39	233	1	255	308	561	248	248	97.3	98.5	259	k__Fungi	p__Basidiomycota	c__Basidiomycota_cls_Incertae_sedis	o__Basidiomycota_ord_Incertae_sedis	f__Basidiomycota_fam_Incertae_sedis	g__Basidiomycota_gen_Incertae_sedis	s__Basidiomycota_sp
OTU274	SINGLETON|n=1	1	0	0	KX766170	SH0907362.10FU	1.82945e-096	355.677	192	1	215	372	588	209	209	97.2	100	215	k__Fungi	p__Basidiomycota	c__Tritirachiomycetes	o__Tritirachiales	f__Tritirachiaceae	g__Paratritirachium	s__Paratritirachium_sp
OTU275	SINGLETON|n=1	1	0	0	GU062229	SH0926075.10FU	3.72473e-104	381.53	206	1	255	308	561	239	239	93.7	98.5	259	k__Fungi	p__Basidiomycota	c__Basidiomycota_cls_Incertae_sedis	o__Basidiomycota_ord_Incertae_sedis	f__Basidiomycota_fam_Incertae_sedis	g__Basidiomycota_gen_Incertae_sedis	s__Basidiomycota_sp
OTU276	SINGLETON|n=1	1	0	0	MH864788	SH0885672.10FU	1.53074e-081	305.817	165	1	181	357	536	176	176	97.2	100	181	k__Fungi	p__Ascomycota	c__Eurotiomycetes	o__Chaetothyriales	f__Herpotrichiellaceae	g__Rhinocladiella	s__Rhinocladiella_atrovirens
OTU277	SINGLETON|n=1	1	0	0	GU062229	SH0926075.10FU	3.65657e-114	414.77	224	1	254	308	561	244	244	96.1	98.4	258	k__Fungi	p__Basidiomycota	c__Basidiomycota_cls_Incertae_sedis	o__Basidiomycota_ord_Incertae_sedis	f__Basidiomycota_fam_Incertae_sedis	g__Basidiomycota_gen_Incertae_sedis	s__Basidiomycota_sp
OTU278	SINGLETON|n=1	1	0	0	UDB03038609	SH0965249.10FU	2.14413e-074	281.811	152	1	155	350	504	154	154	99.4	100	155	k__Fungi	p__Ascomycota	c__Dothideomycetes	o__Pleosporales	f__Phaeosphaeriaceae	g__Leptospora	s__Leptospora_sp
OTU279	SINGLETON|n=1	1	0	0	GU062229	SH0926075.10FU	1.68924e-117	425.85	230	1	254	308	561	246	246	96.9	98.4	258	k__Fungi	p__Basidiomycota	c__Basidiomycota_cls_Incertae_sedis	o__Basidiomycota_ord_Incertae_sedis	f__Basidiomycota_fam_Incertae_sedis	g__Basidiomycota_gen_Incertae_sedis	s__Basidiomycota_sp
OTU280	SINGLETON|n=1	1	0	0	OR613450	SH0822656.10FU	2.14988e-100	368.604	199	1	199	393	591	199	199	100	100	199	k__Fungi	p__Basidiomycota	c__Agaricomycetes	o__Agaricales	f__Pleurotaceae	g__Pleurotus	s__Pleurotus_ostreatus
OTU281	SINGLETON|n=1	1	0	0	GU062229	SH0926075.10FU	1.04008e-104	383.377	207	1	256	308	561	240	240	93.8	98.5	260	k__Fungi	p__Basidiomycota	c__Basidiomycota_cls_Incertae_sedis	o__Basidiomycota_ord_Incertae_sedis	f__Basidiomycota_fam_Incertae_sedis	g__Basidiomycota_gen_Incertae_sedis	s__Basidiomycota_sp
OTU282	SINGLETON|n=1	1	0	0	GU062229	SH0926075.10FU	7.85928e-116	420.31	227	1	254	308	561	245	245	96.5	98.4	258	k__Fungi	p__Basidiomycota	c__Basidiomycota_cls_Incertae_sedis	o__Basidiomycota_ord_Incertae_sedis	f__Basidiomycota_fam_Incertae_sedis	g__Basidiomycota_gen_Incertae_sedis	s__Basidiomycota_sp
OTU283	SINGLETON|n=1	1	0	0	OR387067	SH0974819.10FU	2.37486e-100	368.604	199	1	217	363	580	212	212	97.7	100	217	k__Fungi	p__Ascomycota	c__Eurotiomycetes	o__Chaetothyriales	f__Herpotrichiellaceae	g__Exophiala	s__Exophiala_dermatitidis
OTU284	SINGLETON|n=1	1	0	0	GU062229	SH0926075.10FU	7.85928e-116	420.31	227	1	254	308	561	245	245	96.5	98.4	258	k__Fungi	p__Basidiomycota	c__Basidiomycota_cls_Incertae_sedis	o__Basidiomycota_ord_Incertae_sedis	f__Basidiomycota_fam_Incertae_sedis	g__Basidiomycota_gen_Incertae_sedis	s__Basidiomycota_sp
OTU285	SINGLETON|n=1	1	0	0	UDB01788746	SH0870926.10FU	8.25389e-074	279.964	151	1	164	344	505	160	160	97.6	100	164	k__Fungi	p__Ascomycota	c__Eurotiomycetes	o__Chaetothyriales	f__Chaetothyriales_fam_Incertae_sedis	g__Chaetothyriales_gen_Incertae_sedis	s__Chaetothyriales_sp
OTU286	SINGLETON|n=1	1	0	0	MK782305	SH0850121.10FU	2.8978e-053	211.638	114	1	157	323	490	152	152	96.8	100	157	k__Fungi	p__Ascomycota	c__Saccharomycetes	o__Saccharomycetales	f__Saccharomycetales_fam_Incertae_sedis	g__Saccharomycetales_gen_Incertae_sedis	s__Saccharomycetales_sp
OTU287	SINGLETON|n=1	1	0	0	OM280146	SH0752344.10FU	1.43134e-081	305.817	165	1	171	347	517	169	169	98.8	100	171	k__Fungi	p__Ascomycota	c__Eurotiomycetes	o__Eurotiales	f__Thermoascaceae	g__Paecilomyces	s__Paecilomyces_divaricatus
OTU288	SINGLETON|n=1	1	0	0	UDB04066668	SH0940202.10FU	3.83919e-067	257.805	139	1	160	333	493	154	154	96.3	98.2	163	k__Fungi	p__Ascomycota	c__Eurotiomycetes	o__Eurotiales	f__Aspergillaceae	g__Penicillium	s__Penicillium_sp
OTU289	SINGLETON|n=1	1	0	0	MZ133732	SH0875505.10FU	3.80195e-042	174.705	94	1	157	421	584	142	142	90.4	100	157	k__Fungi	p__Ascomycota	c__Eurotiomycetes	o__Onygenales	f__Gymnoascaceae	g__Gymnoascus	s__Gymnoascus_halophilus
OTU290	SINGLETON|n=1	1	0	0
OTU291	SINGLETON|n=1	1	0	0	OQ832651	SH0856291.10FU	1.32138e-076	289.198	156	1	159	374	532	158	158	99.4	100	159	k__Fungi	p__Ascomycota	c__Dothideomycetes	o__Pleosporales	f__Pleosporaceae	g__Stemphylium	s__Stemphylium_globuliferum
OTU292	SINGLETON|n=1	1	0	0	OR752067	SH0940075.10FU	2.99029e-073	278.118	150	1	165	364	528	160	160	97	100	165	k__Fungi	p__Ascomycota	c__Eurotiomycetes	o__Eurotiales	f__Aspergillaceae	g__Aspergillus	s__Aspergillus_fumigatus
OTU293	SINGLETON|n=1	1	0	0	MH862405	SH0950131.10FU	2.85708e-063	244.878	132	1	153	345	498	147	147	96.1	97.5	157	k__Fungi	p__Ascomycota	c__Xylonomycetes	o__Symbiotaphrinales	f__Symbiotaphrinaceae	g__Symbiotaphrina	s__Symbiotaphrina_lignicola
OTU294	SINGLETON|n=1	1	0	0	OR752067	SH0940075.10FU	2.99029e-073	278.118	150	1	165	364	528	160	160	97	100	165	k__Fungi	p__Ascomycota	c__Eurotiomycetes	o__Eurotiales	f__Aspergillaceae	g__Aspergillus	s__Aspergillus_fumigatus
OTU295	SINGLETON|n=1	1	0	0	EU030275	SH0828639.10FU	1.7862e-065	252.265	136	1	160	334	493	152	152	95	98.2	163	k__Fungi	p__Ascomycota	c__Eurotiomycetes	o__Chaetothyriales	f__Herpotrichiellaceae	g__Sorocybe	s__Sorocybe_resinae
OTU296	SINGLETON|n=1	1	0	0	MK336477	SH0958718.10FU	1.60032e-081	305.817	165	1	188	720	909	182	182	96.8	100	188	k__Fungi	p__Basidiomycota	c__Agaricostilbomycetes	o__Agaricostilbales	f__Agaricostilbales_fam_Incertae_sedis	g__Agaricostilbales_gen_Incertae_sedis	s__Agaricostilbales_sp
OTU297	SINGLETON|n=1	1	0	0	NR_073266	SH0841248.10FU	1.30141e-097	359.37	194	1	200	341	540	198	198	99	100	200	k__Fungi	p__Basidiomycota	c__Agaricostilbomycetes	o__Agaricostilbales	f__Chionosphaeraceae	g__Kurtzmanomyces	s__Kurtzmanomyces_nectairei
OTU298	SINGLETON|n=1	1	0	0	OP315771	SH0871746.10FU	2.54188e-089	331.671	179	1	182	417	598	181	181	99.5	100	182	k__Fungi	p__Ascomycota	c__Sordariomycetes	o__Amphisphaeriales	f__Clypeophysalosporaceae	g__Neophysalospora	s__Neophysalospora_eucalypti
OTU299	SINGLETON|n=1	1	0	0	MK782435	SH0905449.10FU	4.93254e-076	287.351	155	1	164	771	935	162	162	98.8	100	164	k__Fungi	p__Ascomycota	c__Leotiomycetes	o__Helotiales	f__Mollisiaceae	g__Phialocephala	s__Phialocephala_fluminis
OTU300	SINGLETON|n=1	1	0	0	UDB05110292	SH1015336.10FU	4.33337e-056	220.872	119	1	144	311	453	136	136	94.4	100	144	k__Fungi	p__Ascomycota	c__Dothideomycetes	o__Mycosphaerellales	f__Teratosphaeriaceae	g__Devriesia	s__Devriesia_sp
OTU301	SINGLETON|n=1	1	0	0	LN713992	SH0763609.10FU	3.55986e-072	274.424	148	1	154	299	452	152	152	98.7	100	154	k__Fungi	p__Ascomycota	c__Dothideomycetes	o__Mycosphaerellales	f__Neodevriesiaceae	g__Neodevriesia	s__Neodevriesia_sp
OTU302	SINGLETON|n=1	1	0	0
OTU303	SINGLETON|n=1	1	0	0	UDB03608770	SH1012176.10FU	9.24831e-063	243.031	131	1	143	317	459	139	139	97.2	99.3	144	k__Fungi	p__Ascomycota	c__Leotiomycetes	o__Helotiales	f__Helotiales_fam_Incertae_sedis	g__Infundichalara	s__Infundichalara_sp
OTU304	SINGLETON|n=1	1	0	0	KU582303	SH0870090.10FU	9.08325e-089	329.824	178	1	181	397	577	180	180	99.4	100	181	k__Fungi	p__Ascomycota	c__Eurotiomycetes	o__Chaetothyriales	f__Cyphellophoraceae	g__Cyphellophora	s__Cyphellophora_sp
OTU305	SINGLETON|n=1	1	0	0	OW988561	SH0958759.10FU	1.95232e-090	335.364	181	1	181	382	562	181	181	100	100	181	k__Fungi	p__Ascomycota	c__Saccharomycetes	o__Saccharomycetales	f__Phaffomycetaceae	g__Cyberlindnera	s__Cyberlindnera_mississippiensis
OTU306	SINGLETON|n=1	1	0	0
OTU307	SINGLETON|n=1	1	0	0	MT872626	SH0912803.10FU	9.80163e-063	243.031	131	1	151	1577	1729	146	146	96.7	100	151	k__Fungi	p__Ascomycota	c__Eurotiomycetes	o__Eurotiomycetes_ord_Incertae_sedis	f__Eurotiomycetes_fam_Incertae_sedis	g__Eurotiomycetes_gen_Incertae_sedis	s__Eurotiomycetes_sp
OTU308	SINGLETON|n=1	1	0	0
OTU309	SINGLETON|n=1	1	0	0	GU062229	SH0926075.10FU	3.6724e-114	414.77	224	1	255	308	561	245	245	96.1	98.5	259	k__Fungi	p__Basidiomycota	c__Basidiomycota_cls_Incertae_sedis	o__Basidiomycota_ord_Incertae_sedis	f__Basidiomycota_fam_Incertae_sedis	g__Basidiomycota_gen_Incertae_sedis	s__Basidiomycota_sp
OTU310	SINGLETON|n=1	1	0	0	PP115452	SH0911881.10FU	6.50989e-096	353.83	191	2	213	309	520	205	205	96.7	99.5	213	k__Fungi	p__Basidiomycota	c__Microbotryomycetes	o__Sporidiobolales	f__Sporidiobolaceae	g__Sporobolomyces	s__Sporobolomyces_salmonicolor
OTU311	SINGLETON|n=1	1	0	0	LC639279	SH0946103.10FU	1.93347e-059	231.952	125	1	140	370	509	135	135	96.4	100	140	k__Fungi	p__Ascomycota	c__Leotiomycetes	o__Helotiales	f__Myxotrichaceae	g__Oidiodendron	s__Oidiodendron_griseum
OTU312	SINGLETON|n=1	1	0	0	PP115452	SH0911881.10FU	1.80999e-096	355.677	192	1	213	308	520	206	206	96.7	100	213	k__Fungi	p__Basidiomycota	c__Microbotryomycetes	o__Sporidiobolales	f__Sporidiobolaceae	g__Sporobolomyces	s__Sporobolomyces_salmonicolor
OTU313	SINGLETON|n=1	1	0	0	PP115452	SH0911881.10FU	1.40157e-092	342.75	185	1	212	308	520	204	204	96.2	100	212	k__Fungi	p__Basidiomycota	c__Microbotryomycetes	o__Sporidiobolales	f__Sporidiobolaceae	g__Sporobolomyces	s__Sporobolomyces_salmonicolor
OTU314	SINGLETON|n=1	1	0	0	MH188916	SH0926074.10FU	5.62865e-107	390.763	211	1	229	347	575	224	224	97.8	96.2	238	k__Fungi	p__Basidiomycota	c__Exobasidiomycetes	o__Exobasidiales	f__Exobasidiales_fam_Incertae_sedis	g__Guomyces	s__Guomyces_nicotianae
OTU315	SINGLETON|n=1	1	0	0	KT265804	SH0733984.10FU	9.37184e-095	350.137	189	1	232	883	1113	218	218	94	99.1	234	k__Fungi	p__Basidiomycota	c__Microbotryomycetes	o__Sporidiobolales	f__Sporidiobolaceae	g__Rhodotorula	s__Rhodotorula_sp
OTU316	SINGLETON|n=1	1	0	0	GU062229	SH0926075.10FU	3.68253e-109	398.15	215	1	254	308	561	241	241	94.9	98.4	258	k__Fungi	p__Basidiomycota	c__Basidiomycota_cls_Incertae_sedis	o__Basidiomycota_ord_Incertae_sedis	f__Basidiomycota_fam_Incertae_sedis	g__Basidiomycota_gen_Incertae_sedis	s__Basidiomycota_sp
OTU317	SINGLETON|n=1	1	0	0	UDB05110292	SH1015336.10FU	9.16927e-063	243.031	131	1	143	311	453	139	139	97.2	100	143	k__Fungi	p__Ascomycota	c__Dothideomycetes	o__Mycosphaerellales	f__Teratosphaeriaceae	g__Devriesia	s__Devriesia_sp
OTU318	SINGLETON|n=1	1	0	0	MN071391	SH1043354.10FU	8.82854e-095	350.137	189	1	222	297	518	211	211	95	100	222	k__Fungi	p__Fungi_phy_Incertae_sedis	c__Fungi_cls_Incertae_sedis	o__Fungi_ord_Incertae_sedis	f__Fungi_fam_Incertae_sedis	g__Fungi_gen_Incertae_sedis	s__Fungi_sp
OTU319	SINGLETON|n=1	1	0	0	MH188916	SH0926074.10FU	2.61876e-105	385.223	208	1	238	347	584	229	229	96.2	100	238	k__Fungi	p__Basidiomycota	c__Exobasidiomycetes	o__Exobasidiales	f__Exobasidiales_fam_Incertae_sedis	g__Guomyces	s__Guomyces_nicotianae
OTU320	SINGLETON|n=1	1	0	0	MW710094	SH0733979.10FU	5.53599e-112	407.383	220	1	236	324	558	232	232	98.3	100	236	k__Fungi	p__Basidiomycota	c__Microbotryomycetes	o__Microbotryomycetes_ord_Incertae_sedis	f__Colacogloeaceae	g__Colacogloea	s__Colacogloea_philyla
OTU321	SINGLETON|n=1	0	1	0
OTU322	SINGLETON|n=1	0	1	0	OQ696196	SH0762921.10FU	1.0282e-067	259.651	140	1	158	378	536	153	153	96.8	100	158	k__Fungi	p__Ascomycota	c__Sordariomycetes	o__Xylariales	f__Leptosilliaceae	g__Leptosillia	s__Leptosillia_pistaciae
OTU323	SINGLETON|n=1	0	1	0	AF298138	SH1009772.10FU	7.52371e-069	263.345	142	1	151	335	485	149	149	98.7	100	151	k__Fungi	p__Ascomycota	c__Coniocybomycetes	o__Coniocybales	f__Coniocybaceae	g__Chaenotheca	s__Chaenotheca_xyloxena
OTU324	SINGLETON|n=1	0	1	0	AY559329	SH1015359.10FU	2.55919e-048	195.019	105	1	133	322	453	124	124	93.2	94.3	141	k__Fungi	p__Ascomycota	c__Dothideomycetes	o__Mycosphaerellales	f__Extremaceae	g__Saxophila	s__Saxophila_sp
OTU325	SINGLETON|n=1	0	1	0	EU030275	SH0828639.10FU	4.96631e-066	254.111	137	3	160	336	493	151	151	95.6	96.9	163	k__Fungi	p__Ascomycota	c__Eurotiomycetes	o__Chaetothyriales	f__Herpotrichiellaceae	g__Sorocybe	s__Sorocybe_resinae
OTU326	SINGLETON|n=1	0	1	0	OR793058	SH0767731.10FU	1.34084e-071	272.578	147	2	160	363	521	155	155	97.5	99.4	160	k__Fungi	p__Ascomycota	c__Eurotiomycetes	o__Eurotiales	f__Aspergillaceae	g__Penicillium	s__Penicillium_fundyense
OTU327	SINGLETON|n=1	0	1	0	UDB03866722	SH0939722.10FU	2.99029e-073	278.118	150	1	165	337	501	161	161	97.6	100	165	k__Fungi	p__Ascomycota	c__Eurotiomycetes	o__Eurotiales	f__Aspergillaceae	g__Penicillium	s__Penicillium_sp
OTU328	SINGLETON|n=1	0	1	0	OR793058	SH0767731.10FU	8.06979e-069	263.345	142	1	160	362	521	154	154	96.3	100	160	k__Fungi	p__Ascomycota	c__Eurotiomycetes	o__Eurotiales	f__Aspergillaceae	g__Penicillium	s__Penicillium_fundyense
OTU329	SINGLETON|n=1	0	1	0	OR793058	SH0767731.10FU	4.78626e-071	270.731	146	1	158	362	519	154	154	97.5	99.4	159	k__Fungi	p__Ascomycota	c__Eurotiomycetes	o__Eurotiales	f__Aspergillaceae	g__Penicillium	s__Penicillium_fundyense
OTU330	SINGLETON|n=1	0	1	0	MT809296	SH0737869.10FU	3.49686e-062	241.185	130	1	150	352	503	145	145	96.7	100	150	k__Fungi	p__Ascomycota	c__Sareomycetes	o__Sareales	f__Sareaceae	g__Sarea	s__Sarea_sp
OTU331	SINGLETON|n=1	1	0	0	GU062229	SH0926075.10FU	3.64651e-119	431.39	233	1	255	308	561	248	248	97.3	98.5	259	k__Fungi	p__Basidiomycota	c__Basidiomycota_cls_Incertae_sedis	o__Basidiomycota_ord_Incertae_sedis	f__Basidiomycota_fam_Incertae_sedis	g__Basidiomycota_gen_Incertae_sedis	s__Basidiomycota_sp
OTU332	SINGLETON|n=1	1	0	0	GU062229	SH0926075.10FU	7.94934e-111	403.69	218	1	255	308	561	243	243	95.3	98.5	259	k__Fungi	p__Basidiomycota	c__Basidiomycota_cls_Incertae_sedis	o__Basidiomycota_ord_Incertae_sedis	f__Basidiomycota_fam_Incertae_sedis	g__Basidiomycota_gen_Incertae_sedis	s__Basidiomycota_sp
OTU333	SINGLETON|n=1	1	0	0	GU062229	SH0926075.10FU	3.6724e-114	414.77	224	1	255	308	561	245	245	96.1	98.5	259	k__Fungi	p__Basidiomycota	c__Basidiomycota_cls_Incertae_sedis	o__Basidiomycota_ord_Incertae_sedis	f__Basidiomycota_fam_Incertae_sedis	g__Basidiomycota_gen_Incertae_sedis	s__Basidiomycota_sp
OTU334	SINGLETON|n=1	0	1	0	UDB03123846	SH0924986.10FU	1.00465e-067	259.651	140	1	155	330	485	151	151	97.4	100	155	k__Fungi	p__Ascomycota	c__Dothideomycetes	o__Mytilinidiales	f__Mytilinidiaceae	g__Lophium	s__Lophium_sp
OTU335	SINGLETON|n=1	0	1	0	UDB03123353	SH0924986.10FU	1.00465e-067	259.651	140	1	155	329	483	150	150	96.8	100	155	k__Fungi	p__Ascomycota	c__Dothideomycetes	o__Mytilinidiales	f__Mytilinidiaceae	g__Lophium	s__Lophium_sp
OTU336	SINGLETON|n=1	0	1	0	OM337573	SH0849718.10FU	8.31249e-069	263.345	142	1	164	538	700	157	157	95.7	100	164	k__Fungi	p__Ascomycota	c__Dothideomycetes	o__Mytilinidiales	f__Mytilinidiaceae	g__Mytilinidion	s__Mytilinidion_resinicola
OTU337	SINGLETON|n=1	0	1	0	OR569668	SH0991327.10FU	2.73027e-073	278.118	150	1	153	356	508	152	152	99.3	100	153	k__Fungi	p__Ascomycota	c__Dothideomycetes	o__Pleosporales	f__Didymosphaeriaceae	g__Pseudopithomyces	s__Pseudopithomyces_chartarum
OTU338	SINGLETON|n=1	0	1	0	AY559372	SH0842946.10FU	9.10463e-068	259.651	140	1	143	314	456	142	142	99.3	100	143	k__Fungi	p__Ascomycota	c__Dothideomycetes	o__Mycosphaerellales	f__Extremaceae	g__Petrophila	s__Petrophila_incerta
OTU339	SINGLETON|n=1	0	1	0	MK801314	SH0950131.10FU	1.3593e-056	222.718	120	3	156	394	546	143	143	92.9	96.9	159	k__Fungi	p__Ascomycota	c__Xylonomycetes	o__Symbiotaphrinales	f__Symbiotaphrinaceae	g__Symbiotaphrina	s__Symbiotaphrina_microtheca
OTU340	SINGLETON|n=1	1	0	0	GU062229	SH0926075.10FU	3.65657e-114	414.77	224	1	254	308	561	244	244	96.1	98.4	258	k__Fungi	p__Basidiomycota	c__Basidiomycota_cls_Incertae_sedis	o__Basidiomycota_ord_Incertae_sedis	f__Basidiomycota_fam_Incertae_sedis	g__Basidiomycota_gen_Incertae_sedis	s__Basidiomycota_sp
OTU341	SINGLETON|n=1	0	1	0	OQ718080	SH0738016.10FU	3.63622e-057	224.565	121	6	154	378	525	140	140	94	96.8	154	k__Fungi	p__Ascomycota	c__Sareomycetes	o__Sareales	f__Sareaceae	g__Sarea	s__Sarea_coeloplata
OTU342	SINGLETON|n=1	0	1	0	MT813950	SH0950131.10FU	1.07469e-057	226.412	122	22	159	235	371	133	133	96.4	85.2	162	k__Fungi	p__Ascomycota	c__Xylonomycetes	o__Symbiotaphrinales	f__Symbiotaphrinaceae	g__Symbiotaphrina	s__Symbiotaphrina_microtheca
OTU343	SINGLETON|n=1	0	1	0	OR803414	SH0925964.10FU	7.65141e-074	279.964	151	1	154	368	521	153	153	99.4	100	154	k__Fungi	p__Ascomycota	c__Dothideomycetes	o__Dothideales	f__Saccotheciaceae	g__Aureobasidium	s__Aureobasidium_sp
OTU344	SINGLETON|n=1	1	0	0	GU062229	SH0926075.10FU	1.70124e-112	409.23	221	1	254	308	561	243	243	95.7	98.4	258	k__Fungi	p__Basidiomycota	c__Basidiomycota_cls_Incertae_sedis	o__Basidiomycota_ord_Incertae_sedis	f__Basidiomycota_fam_Incertae_sedis	g__Basidiomycota_gen_Incertae_sedis	s__Basidiomycota_sp
OTU345	SINGLETON|n=1	0	1	0	MW842907	SH0972129.10FU	9.02614e-068	259.651	140	1	140	308	447	140	140	100	98.6	142	k__Fungi	p__Fungi_phy_Incertae_sedis	c__Fungi_cls_Incertae_sedis	o__Fungi_ord_Incertae_sedis	f__Fungi_fam_Incertae_sedis	g__Fungi_gen_Incertae_sedis	s__Fungi_sp
OTU346	SINGLETON|n=1	0	1	0	MT813950	SH0950131.10FU	4.74721e-066	254.111	137	1	153	217	368	148	148	96.7	97.5	157	k__Fungi	p__Ascomycota	c__Xylonomycetes	o__Symbiotaphrinales	f__Symbiotaphrinaceae	g__Symbiotaphrina	s__Symbiotaphrina_microtheca
OTU347	SINGLETON|n=1	0	1	0	KJ001866	SH0767731.10FU	4.85878e-071	270.731	146	1	161	308	469	158	158	98.1	100	161	k__Fungi	p__Ascomycota	c__Eurotiomycetes	o__Eurotiales	f__Aspergillaceae	g__Penicillium	s__Penicillium_sp
OTU348	SINGLETON|n=1	1	0	0
OTU349	SINGLETON|n=1	1	0	0	MN071391	SH1043354.10FU	1.88419e-101	372.297	201	1	222	297	518	215	215	96.8	100	222	k__Fungi	p__Fungi_phy_Incertae_sedis	c__Fungi_cls_Incertae_sedis	o__Fungi_ord_Incertae_sedis	f__Fungi_fam_Incertae_sedis	g__Fungi_gen_Incertae_sedis	s__Fungi_sp
OTU350	SINGLETON|n=1	0	1	0	OR069551	SH0767731.10FU	3.81213e-072	274.424	148	1	163	331	493	158	158	96.9	100	163	k__Fungi	p__Ascomycota	c__Eurotiomycetes	o__Eurotiales	f__Aspergillaceae	g__Penicillium	s__Penicillium_corylophilum
OTU351	SINGLETON|n=1	1	0	0	MT872624	SH0912804.10FU	9.88068e-063	243.031	131	1	152	578	729	145	145	95.4	100	152	k__Fungi	p__Ascomycota	c__Eurotiomycetes	o__Eurotiomycetes_ord_Incertae_sedis	f__Eurotiomycetes_fam_Incertae_sedis	g__Eurotiomycetes_gen_Incertae_sedis	s__Eurotiomycetes_sp
OTU352	SINGLETON|n=1	1	0	0	MH188916	SH0926074.10FU	9.37408e-105	383.377	207	1	237	347	584	229	229	96.6	100	237	k__Fungi	p__Basidiomycota	c__Exobasidiomycetes	o__Exobasidiales	f__Exobasidiales_fam_Incertae_sedis	g__Guomyces	s__Guomyces_nicotianae
OTU353	SINGLETON|n=1	0	1	0	OR069551	SH0767731.10FU	2.22788e-074	281.811	152	1	160	331	493	160	160	100	100	160	k__Fungi	p__Ascomycota	c__Eurotiomycetes	o__Eurotiales	f__Aspergillaceae	g__Penicillium	s__Penicillium_corylophilum
OTU354	SINGLETON|n=1	0	1	0	OQ874393	SH0767731.10FU	8.3104e-064	246.725	133	1	163	292	454	153	153	93.9	100	163	k__Fungi	p__Ascomycota	c__Eurotiomycetes	o__Eurotiales	f__Aspergillaceae	g__Penicillium	s__Penicillium_sp
OTU355	SINGLETON|n=1	0	1	0	KJ406887	SH0767731.10FU	4.82453e-076	287.351	155	1	161	266	427	160	160	99.4	100	161	k__Fungi	p__Ascomycota	c__Eurotiomycetes	o__Eurotiales	f__Aspergillaceae	g__Penicillium	s__Penicillium_sp
OTU356	SINGLETON|n=1	0	1	0	UDB03955738	SH0939707.10FU	4.85878e-071	270.731	146	1	161	331	492	157	157	97.5	100	161	k__Fungi	p__Ascomycota	c__Eurotiomycetes	o__Eurotiales	f__Aspergillaceae	g__Penicillium	s__Penicillium_sp
OTU357	SINGLETON|n=1	0	1	0	OR069551	SH0767731.10FU	3.81213e-072	274.424	148	1	163	331	493	158	158	96.9	100	163	k__Fungi	p__Ascomycota	c__Eurotiomycetes	o__Eurotiales	f__Aspergillaceae	g__Penicillium	s__Penicillium_corylophilum
OTU358	SINGLETON|n=1	1	0	0
OTU359	SINGLETON|n=1	0	1	0	KJ607253	SH0970643.10FU	4.80091e-037	158.086	85	1	178	454	638	155	155	87.1	93.7	190	k__Fungi	p__Ascomycota	c__Sordariomycetes	o__Microascales	f__Microascaceae	g__Pseudallescheria	s__Pseudallescheria_ellipsoidea
OTU360	SINGLETON|n=1	0	1	0	OW988092	SH0940189.10FU	5.07656e-076	287.351	155	1	166	372	539	164	164	98.8	98.8	168	k__Fungi	p__Ascomycota	c__Eurotiomycetes	o__Eurotiales	f__Aspergillaceae	g__Penicillium	s__Penicillium_sanguifluum
OTU361	SINGLETON|n=1	0	1	0	MK801333	SH0974827.10FU	1.08877e-078	296.584	160	1	209	415	634	202	202	96.7	100	209	k__Fungi	p__Ascomycota	c__Eurotiomycetes	o__Chaetothyriales	f__Chaetothyriales_fam_Incertae_sedis	g__Chaetothyriales_gen_Incertae_sedis	s__Chaetothyriales_sp
OTU362	SINGLETON|n=1	0	1	0	OQ600167	SH0897344.10FU	4.30901e-066	254.111	137	1	137	335	471	137	137	100	94.5	145	k__Fungi	p__Ascomycota	c__Leotiomycetes	o__Thelebolales	f__Pseudeurotiaceae	g__Beskidomyces	s__Beskidomyces_laricis
OTU363	SINGLETON|n=1	1	0	0
OTU364	SINGLETON|n=1	0	1	0	UDB03608770	SH1012176.10FU	1.20484e-056	222.718	120	1	144	317	460	136	136	94.4	100	144	k__Fungi	p__Ascomycota	c__Leotiomycetes	o__Helotiales	f__Helotiales_fam_Incertae_sedis	g__Infundichalara	s__Infundichalara_sp
OTU365	SINGLETON|n=1	1	0	0	MK019050	SH1027467.10FU	1.07576e-082	309.511	167	1	167	163	329	167	167	100	100	167	k__Fungi	p__Ascomycota	c__Pezizomycetes	o__Pezizales	f__Pyronemataceae	g__Scutellinia	s__Scutellinia_sp
OTU366	SINGLETON|n=1	0	1	0	EU030275	SH0828639.10FU	8.3104e-064	246.725	133	1	160	334	493	151	151	94.4	98.2	163	k__Fungi	p__Ascomycota	c__Eurotiomycetes	o__Chaetothyriales	f__Herpotrichiellaceae	g__Sorocybe	s__Sorocybe_resinae
OTU367	SINGLETON|n=1	1	0	0	ON989591	SH0976639.10FU	1.46116e-081	305.817	165	1	174	287	460	171	171	98.3	100	174	k__Fungi	p__Ascomycota	c__Eurotiomycetes	o__Chaetothyriales	f__Herpotrichiellaceae	g__Exophiala	s__Exophiala_bergeri
OTU368	SINGLETON|n=1	1	0	0
OTU369	SINGLETON|n=1	1	0	0
OTU370	SINGLETON|n=1	0	1	0	FJ235127	SH0892767.10FU	9.85002e-089	329.824	178	1	193	407	599	188	188	97.4	99.5	194	k__Fungi	p__Ascomycota	c__Saccharomycetes	o__Saccharomycetales	f__Saccharomycetales_fam_Incertae_sedis	g__Candida	s__Candida_keroseneae
OTU371	SINGLETON|n=1	0	1	0	EU030275	SH0828639.10FU	1.7862e-065	252.265	136	1	160	334	493	152	152	95	98.2	163	k__Fungi	p__Ascomycota	c__Eurotiomycetes	o__Chaetothyriales	f__Herpotrichiellaceae	g__Sorocybe	s__Sorocybe_resinae
OTU372	SINGLETON|n=1	0	1	0
OTU373	SINGLETON|n=1	1	0	0	HQ611323	SH0974823.10FU	3.98706e-073	278.118	150	1	156	402	557	154	154	98.7	73.9	211	k__Fungi	p__Ascomycota	c__Eurotiomycetes	o__Chaetothyriales	f__Herpotrichiellaceae	g__Exophiala	s__Exophiala_sp
OTU374	SINGLETON|n=1	0	1	0	EU030275	SH0828639.10FU	1.7862e-065	252.265	136	1	160	334	493	152	152	95	98.2	163	k__Fungi	p__Ascomycota	c__Eurotiomycetes	o__Chaetothyriales	f__Herpotrichiellaceae	g__Sorocybe	s__Sorocybe_resinae
OTU375	SINGLETON|n=1	0	1	0	EU030275	SH0828639.10FU	6.32985e-065	250.418	135	1	158	334	493	152	152	96.2	98.1	161	k__Fungi	p__Ascomycota	c__Eurotiomycetes	o__Chaetothyriales	f__Herpotrichiellaceae	g__Sorocybe	s__Sorocybe_resinae
OTU376	SINGLETON|n=1	0	1	0	EU030275	SH0828639.10FU	1.7862e-065	252.265	136	1	160	334	493	152	152	95	98.2	163	k__Fungi	p__Ascomycota	c__Eurotiomycetes	o__Chaetothyriales	f__Herpotrichiellaceae	g__Sorocybe	s__Sorocybe_resinae
OTU377	SINGLETON|n=1	1	0	0	FJ235127	SH0892767.10FU	1.27418e-087	326.131	176	1	194	407	600	188	188	96.9	100	194	k__Fungi	p__Ascomycota	c__Saccharomycetes	o__Saccharomycetales	f__Saccharomycetales_fam_Incertae_sedis	g__Candida	s__Candida_keroseneae
OTU378	SINGLETON|n=1	0	1	0	OR091314	SH0801460.10FU	4.89328e-066	254.111	137	1	143	347	489	141	141	98.6	88.8	161	k__Fungi	p__Ascomycota	c__Eurotiomycetes	o__Phaeomoniellales	f__Celotheliaceae	g__Phaeomoniella	s__Phaeomoniella_sp
OTU379	SINGLETON|n=1	0	1	0	OP437840	SH0801479.10FU	1.74869e-080	302.124	163	1	163	364	526	163	163	100	100	163	k__Fungi	p__Ascomycota	c__Eurotiomycetes	o__Phaeomoniellales	f__Celotheliaceae	g__Neophaeomoniella	s__Neophaeomoniella_zymoides
OTU380	SINGLETON|n=1	0	1	0	EU030275	SH0828639.10FU	8.25181e-069	263.345	142	1	160	334	493	154	154	96.3	98.2	163	k__Fungi	p__Ascomycota	c__Eurotiomycetes	o__Chaetothyriales	f__Herpotrichiellaceae	g__Sorocybe	s__Sorocybe_resinae
OTU381	SINGLETON|n=1	0	1	0	OR387067	SH0974819.10FU	4.03673e-098	361.217	195	1	220	363	580	212	212	96.4	100	220	k__Fungi	p__Ascomycota	c__Eurotiomycetes	o__Chaetothyriales	f__Herpotrichiellaceae	g__Exophiala	s__Exophiala_dermatitidis
OTU382	SINGLETON|n=1	0	1	0	OR387067	SH0974819.10FU	1.4546e-092	342.75	185	1	219	363	580	208	208	95	100	219	k__Fungi	p__Ascomycota	c__Eurotiomycetes	o__Chaetothyriales	f__Herpotrichiellaceae	g__Exophiala	s__Exophiala_dermatitidis
OTU383	SINGLETON|n=1	0	1	0	OR387067	SH0974819.10FU	2.94403e-079	298.431	161	1	173	363	536	170	170	98.3	84.8	204	k__Fungi	p__Ascomycota	c__Eurotiomycetes	o__Chaetothyriales	f__Herpotrichiellaceae	g__Exophiala	s__Exophiala_dermatitidis
OTU384	SINGLETON|n=1	0	1	0	OR387067	SH0974819.10FU	1.44434e-097	359.37	194	1	219	363	580	211	211	96.3	100	219	k__Fungi	p__Ascomycota	c__Eurotiomycetes	o__Chaetothyriales	f__Herpotrichiellaceae	g__Exophiala	s__Exophiala_dermatitidis
OTU385	SINGLETON|n=1	0	1	0	OR387067	SH0974819.10FU	1.44434e-097	359.37	194	1	219	363	580	211	211	96.3	100	219	k__Fungi	p__Ascomycota	c__Eurotiomycetes	o__Chaetothyriales	f__Herpotrichiellaceae	g__Exophiala	s__Exophiala_dermatitidis
OTU386	SINGLETON|n=1	1	0	0	MH535871	SH0912800.10FU	7.47067e-074	279.964	151	1	151	606	756	151	151	100	100	151	k__Fungi	p__Ascomycota	c__Dothideomycetes	o__Hysteriales	f__Hysteriaceae	g__Gloniopsis	s__Gloniopsis_subrugosa
OTU387	SINGLETON|n=1	1	0	0	LC646545	SH0946018.10FU	1.93347e-059	231.952	125	1	140	344	483	135	135	96.4	100	140	k__Fungi	p__Ascomycota	c__Leotiomycetes	o__Helotiales	f__Amorphothecaceae	g__Amorphotheca	s__Amorphotheca_resinae
OTU388	SINGLETON|n=1	0	1	0	EU030275	SH0828639.10FU	1.7862e-065	252.265	136	1	160	334	493	152	152	95	98.2	163	k__Fungi	p__Ascomycota	c__Eurotiomycetes	o__Chaetothyriales	f__Herpotrichiellaceae	g__Sorocybe	s__Sorocybe_resinae
OTU389	SINGLETON|n=1	0	1	0	UDB03470178	SH0966890.10FU	7.15966e-069	263.345	142	1	145	319	463	144	144	99.3	100	145	k__Fungi	p__Ascomycota	c__Leotiomycetes	o__Helotiales	f__Hyaloscyphaceae	g__Hyaloscypha	s__Hyaloscypha_sp
OTU390	SINGLETON|n=1	0	1	0	EU030275	SH0828639.10FU	3.18688e-028	128.539	69	56	145	387	476	83	83	92.2	54.5	165	k__Fungi	p__Ascomycota	c__Eurotiomycetes	o__Chaetothyriales	f__Herpotrichiellaceae	g__Sorocybe	s__Sorocybe_resinae
OTU391	SINGLETON|n=1	0	1	0	MK782435	SH0905449.10FU	1.83874e-065	252.265	136	1	167	771	935	157	157	94	100	167	k__Fungi	p__Ascomycota	c__Leotiomycetes	o__Helotiales	f__Mollisiaceae	g__Phialocephala	s__Phialocephala_fluminis
OTU392	SINGLETON|n=1	0	1	0	MT872624	SH0912804.10FU	1.68551e-035	152.546	82	1	115	578	693	105	105	91.3	76.7	150	k__Fungi	p__Ascomycota	c__Eurotiomycetes	o__Eurotiomycetes_ord_Incertae_sedis	f__Eurotiomycetes_fam_Incertae_sedis	g__Eurotiomycetes_gen_Incertae_sedis	s__Eurotiomycetes_sp
OTU393	SINGLETON|n=1	0	1	0	MT872624	SH0912804.10FU	3.62277e-037	158.086	85	1	150	578	729	130	130	86.7	100	150	k__Fungi	p__Ascomycota	c__Eurotiomycetes	o__Eurotiomycetes_ord_Incertae_sedis	f__Eurotiomycetes_fam_Incertae_sedis	g__Eurotiomycetes_gen_Incertae_sedis	s__Eurotiomycetes_sp
OTU394	SINGLETON|n=1	1	0	0	UDB01441599	SH0878054.10FU	3.86875e-077	291.044	157	1	166	343	509	164	164	98.8	100	166	k__Fungi	p__Ascomycota	c__Eurotiomycetes	o__Eurotiales	f__Aspergillaceae	g__Aspergillus	s__Aspergillus_sp
OTU395	SINGLETON|n=1	0	1	0	MZ016906	SH0976523.10FU	4.06138e-087	324.284	175	1	175	885	1059	175	175	100	100	175	k__Fungi	p__Fungi_phy_Incertae_sedis	c__Fungi_cls_Incertae_sedis	o__Fungi_ord_Incertae_sedis	f__Fungi_fam_Incertae_sedis	g__Fungi_gen_Incertae_sedis	s__Fungi_sp
OTU396	SINGLETON|n=1	0	1	0	UDB07379847	SH0745609.10FU	1.91888e-106	388.917	210	3	227	454	678	220	220	97.8	99.1	227	k__Fungi	p__Chytridiomycota	c__Spizellomycetes	o__Spizellomycetales	f__Spizellomycetaceae	g__Spizellomycetaceae_gen_Incertae_sedis	s__Spizellomycetaceae_sp
OTU397	SINGLETON|n=1	0	1	0	GU062229	SH0926075.10FU	1.04746e-099	366.757	198	1	256	308	561	237	237	92.6	98.5	260	k__Fungi	p__Basidiomycota	c__Basidiomycota_cls_Incertae_sedis	o__Basidiomycota_ord_Incertae_sedis	f__Basidiomycota_fam_Incertae_sedis	g__Basidiomycota_gen_Incertae_sedis	s__Basidiomycota_sp
OTU398	SINGLETON|n=1	0	1	0	GU062229	SH0926075.10FU	7.8933e-116	420.31	227	1	255	308	561	246	246	96.5	98.5	259	k__Fungi	p__Basidiomycota	c__Basidiomycota_cls_Incertae_sedis	o__Basidiomycota_ord_Incertae_sedis	f__Basidiomycota_fam_Incertae_sedis	g__Basidiomycota_gen_Incertae_sedis	s__Basidiomycota_sp
OTU399	SINGLETON|n=1	1	0	0	OR965242	SH0940637.10FU	5.03935e-066	254.111	137	1	143	336	478	141	141	98.6	86.7	165	k__Fungi	p__Ascomycota	c__Eurotiomycetes	o__Eurotiales	f__Aspergillaceae	g__Penicillium	s__Penicillium_sp
OTU400	SINGLETON|n=1	0	1	0	UDB07537072	SH0965020.10FU	1.55824e-091	339.057	183	1	186	371	556	185	185	99.5	100	186	k__Fungi	p__Basidiomycota	c__Agaricomycetes	o__Hymenochaetales	f__Schizoporaceae	g__Xylodon	s__Xylodon_sp
OTU401	SINGLETON|n=1	1	0	0	KP791764	SH1015359.10FU	1.98166e-054	215.332	116	3	142	338	477	132	132	94.3	98.6	142	k__Fungi	p__Ascomycota	c__Dothideomycetes	o__Mycosphaerellales	f__Extremaceae	g__Saxophila	s__Saxophila_tyrrhenica
OTU402	SINGLETON|n=1	1	0	0	MH101400	SH0940222.10FU	2.31198e-079	298.431	161	1	164	317	480	163	163	99.4	98.8	166	k__Fungi	p__Ascomycota	c__Eurotiomycetes	o__Eurotiales	f__Aspergillaceae	g__Penicillium	s__Penicillium_sanguifluum
OTU403	SINGLETON|n=1	1	0	0	OR069551	SH0767731.10FU	3.81213e-072	274.424	148	1	163	331	493	158	158	96.9	100	163	k__Fungi	p__Ascomycota	c__Eurotiomycetes	o__Eurotiales	f__Aspergillaceae	g__Penicillium	s__Penicillium_corylophilum
OTU404	SINGLETON|n=1	0	1	0	OP470296	SH0937368.10FU	8.86916e-068	259.651	140	1	140	310	449	140	140	100	100	140	k__Fungi	p__Basidiomycota	c__Tremellomycetes	o__Tremellales	f__Bulleribasidiaceae	g__Vishniacozyma	s__Vishniacozyma_sp
OTU405	SINGLETON|n=1	0	1	0	OR905871	SH0877593.10FU	2.3415e-110	401.843	217	1	217	349	565	217	217	100	100	217	k__Fungi	p__Basidiomycota	c__Microbotryomycetes	o__Sporidiobolales	f__Sporidiobolaceae	g__Rhodotorula	s__Rhodotorula_mucilaginosa
OTU406	SINGLETON|n=1	0	1	0	OM337566	SH0969905.10FU	2.56376e-120	435.083	235	1	238	489	726	237	237	99.6	100	238	k__Fungi	p__Basidiomycota	c__Exobasidiomycetes	o__Microstromatales	f__Microstromatales_fam_Incertae_sedis	g__Pseudomicrostroma	s__Pseudomicrostroma_glucosiphilum
OTU407	SINGLETON|n=1	0	1	0
OTU408	SINGLETON|n=1	0	1	0	GU062229	SH0926075.10FU	1.7086e-112	409.23	221	1	255	308	561	244	244	95.7	98.5	259	k__Fungi	p__Basidiomycota	c__Basidiomycota_cls_Incertae_sedis	o__Basidiomycota_ord_Incertae_sedis	f__Basidiomycota_fam_Incertae_sedis	g__Basidiomycota_gen_Incertae_sedis	s__Basidiomycota_sp
OTU409	SINGLETON|n=1	0	1	0	OR069614	SH1024970.10FU	9.55511e-089	329.824	178	3	189	351	537	184	184	98.4	98.9	189	k__Fungi	p__Ascomycota	c__Dothideomycetes	o__Dothideales	f__Saccotheciaceae	g__Aureobasidium	s__Aureobasidium_sp
OTU410	SINGLETON|n=1	1	0	0	OP046435	SH0760250.10FU	5.39176e-117	424.003	229	1	232	574	805	231	231	99.6	100	232	k__Fungi	p__Ascomycota	c__Saccharomycetes	o__Saccharomycetales	f__Saccharomycetaceae	g__Saccharomyces	s__Saccharomyces_cerevisiae
OTU411	SINGLETON|n=1	0	1	0	GU062229	SH0926075.10FU	7.85928e-116	420.31	227	1	254	308	561	245	245	96.5	98.4	258	k__Fungi	p__Basidiomycota	c__Basidiomycota_cls_Incertae_sedis	o__Basidiomycota_ord_Incertae_sedis	f__Basidiomycota_fam_Incertae_sedis	g__Basidiomycota_gen_Incertae_sedis	s__Basidiomycota_sp
OTU412	SINGLETON|n=1	0	1	0	GU062229	SH0926075.10FU	2.15679e-116	422.156	228	1	251	308	561	246	246	98	98.4	255	k__Fungi	p__Basidiomycota	c__Basidiomycota_cls_Incertae_sedis	o__Basidiomycota_ord_Incertae_sedis	f__Basidiomycota_fam_Incertae_sedis	g__Basidiomycota_gen_Incertae_sedis	s__Basidiomycota_sp
OTU413	SINGLETON|n=1	1	0	0	JF705945	SH0738016.10FU	2.79115e-063	244.878	132	1	153	332	484	147	147	96.1	99.4	154	k__Fungi	p__Ascomycota	c__Sareomycetes	o__Sareales	f__Sareaceae	g__Sarea	s__Sarea_sp
OTU414	SINGLETON|n=1	0	1	0	GU062229	SH0926075.10FU	7.85928e-116	420.31	227	1	254	308	561	245	245	96.5	98.4	258	k__Fungi	p__Basidiomycota	c__Basidiomycota_cls_Incertae_sedis	o__Basidiomycota_ord_Incertae_sedis	f__Basidiomycota_fam_Incertae_sedis	g__Basidiomycota_gen_Incertae_sedis	s__Basidiomycota_sp
OTU415	SINGLETON|n=1	0	1	0	GU062229	SH0926075.10FU	1.00346e-114	416.616	225	1	251	308	561	245	245	97.6	98.4	255	k__Fungi	p__Basidiomycota	c__Basidiomycota_cls_Incertae_sedis	o__Basidiomycota_ord_Incertae_sedis	f__Basidiomycota_fam_Incertae_sedis	g__Basidiomycota_gen_Incertae_sedis	s__Basidiomycota_sp
OTU416	SINGLETON|n=1	0	1	0	GU062229	SH0926075.10FU	2.15679e-116	422.156	228	1	251	308	561	246	246	98	98.4	255	k__Fungi	p__Basidiomycota	c__Basidiomycota_cls_Incertae_sedis	o__Basidiomycota_ord_Incertae_sedis	f__Basidiomycota_fam_Incertae_sedis	g__Basidiomycota_gen_Incertae_sedis	s__Basidiomycota_sp
OTU417	SINGLETON|n=1	0	1	0	GU062215	SH0926075.10FU	7.80959e-086	320.591	173	1	222	409	628	208	208	93.7	89.9	247	k__Fungi	p__Basidiomycota	c__Basidiomycota_cls_Incertae_sedis	o__Basidiomycota_ord_Incertae_sedis	f__Basidiomycota_fam_Incertae_sedis	g__Basidiomycota_gen_Incertae_sedis	s__Basidiomycota_sp
OTU418	SINGLETON|n=1	0	1	0	GU062229	SH0926075.10FU	8.00578e-106	387.07	209	1	255	308	561	240	240	94.1	98.5	259	k__Fungi	p__Basidiomycota	c__Basidiomycota_cls_Incertae_sedis	o__Basidiomycota_ord_Incertae_sedis	f__Basidiomycota_fam_Incertae_sedis	g__Basidiomycota_gen_Incertae_sedis	s__Basidiomycota_sp
OTU419	SINGLETON|n=1	0	1	0	GU062229	SH0926075.10FU	3.64651e-119	431.39	233	1	255	308	561	248	248	97.3	98.5	259	k__Fungi	p__Basidiomycota	c__Basidiomycota_cls_Incertae_sedis	o__Basidiomycota_ord_Incertae_sedis	f__Basidiomycota_fam_Incertae_sedis	g__Basidiomycota_gen_Incertae_sedis	s__Basidiomycota_sp
OTU420	SINGLETON|n=1	0	1	0	GU062229	SH0926075.10FU	3.64651e-119	431.39	233	1	255	308	561	248	248	97.3	98.5	259	k__Fungi	p__Basidiomycota	c__Basidiomycota_cls_Incertae_sedis	o__Basidiomycota_ord_Incertae_sedis	f__Basidiomycota_fam_Incertae_sedis	g__Basidiomycota_gen_Incertae_sedis	s__Basidiomycota_sp
OTU421	SINGLETON|n=1	0	1	0	GU062229	SH0926075.10FU	7.8933e-116	420.31	227	1	255	308	561	246	246	96.5	98.5	259	k__Fungi	p__Basidiomycota	c__Basidiomycota_cls_Incertae_sedis	o__Basidiomycota_ord_Incertae_sedis	f__Basidiomycota_fam_Incertae_sedis	g__Basidiomycota_gen_Incertae_sedis	s__Basidiomycota_sp
OTU422	SINGLETON|n=1	0	1	0	GU062229	SH0926075.10FU	1.69655e-117	425.85	230	1	255	308	561	247	247	96.9	98.5	259	k__Fungi	p__Basidiomycota	c__Basidiomycota_cls_Incertae_sedis	o__Basidiomycota_ord_Incertae_sedis	f__Basidiomycota_fam_Incertae_sedis	g__Basidiomycota_gen_Incertae_sedis	s__Basidiomycota_sp
OTU423	SINGLETON|n=1	0	1	0	GU062229	SH0926075.10FU	2.21021e-111	405.537	219	1	253	308	559	242	242	95.7	97.7	259	k__Fungi	p__Basidiomycota	c__Basidiomycota_cls_Incertae_sedis	o__Basidiomycota_ord_Incertae_sedis	f__Basidiomycota_fam_Incertae_sedis	g__Basidiomycota_gen_Incertae_sedis	s__Basidiomycota_sp
OTU424	SINGLETON|n=1	0	1	0	GU062229	SH0926075.10FU	7.85928e-116	420.31	227	1	254	308	561	245	245	96.5	98.4	258	k__Fungi	p__Basidiomycota	c__Basidiomycota_cls_Incertae_sedis	o__Basidiomycota_ord_Incertae_sedis	f__Basidiomycota_fam_Incertae_sedis	g__Basidiomycota_gen_Incertae_sedis	s__Basidiomycota_sp
OTU425	SINGLETON|n=1	0	1	0	GU062229	SH0926075.10FU	7.85928e-116	420.31	227	1	254	308	561	245	245	96.5	98.4	258	k__Fungi	p__Basidiomycota	c__Basidiomycota_cls_Incertae_sedis	o__Basidiomycota_ord_Incertae_sedis	f__Basidiomycota_fam_Incertae_sedis	g__Basidiomycota_gen_Incertae_sedis	s__Basidiomycota_sp
OTU426	SINGLETON|n=1	0	1	0	GU062229	SH0926075.10FU	4.87336e-098	361.217	195	1	256	308	561	236	236	92.2	98.5	260	k__Fungi	p__Basidiomycota	c__Basidiomycota_cls_Incertae_sedis	o__Basidiomycota_ord_Incertae_sedis	f__Basidiomycota_fam_Incertae_sedis	g__Basidiomycota_gen_Incertae_sedis	s__Basidiomycota_sp
OTU427	SINGLETON|n=1	0	1	0	GU062229	SH0926075.10FU	1.7086e-112	409.23	221	1	255	308	561	244	244	95.7	98.5	259	k__Fungi	p__Basidiomycota	c__Basidiomycota_cls_Incertae_sedis	o__Basidiomycota_ord_Incertae_sedis	f__Basidiomycota_fam_Incertae_sedis	g__Basidiomycota_gen_Incertae_sedis	s__Basidiomycota_sp
OTU428	SINGLETON|n=1	0	1	0	MN071391	SH1043354.10FU	2.43736e-100	368.604	199	3	222	299	518	213	213	96.8	99.1	222	k__Fungi	p__Fungi_phy_Incertae_sedis	c__Fungi_cls_Incertae_sedis	o__Fungi_ord_Incertae_sedis	f__Fungi_fam_Incertae_sedis	g__Fungi_gen_Incertae_sedis	s__Fungi_sp
OTU429	SINGLETON|n=1	0	1	0	OQ346259	SH1003957.10FU	2.18737e-100	368.604	199	1	202	435	636	201	201	99.5	100	202	k__Fungi	p__Basidiomycota	c__Agaricomycetes	o__Agaricales	f__Psathyrellaceae	g__Coprinellus	s__Coprinellus_radians
OTU430	SINGLETON|n=1	0	1	0	OQ734577	SH1006583.10FU	5.78065e-091	337.211	182	1	191	407	598	189	189	99	100	191	k__Fungi	p__Mucoromycota	c__Mucoromycetes	o__Mucorales	f__Syncephalastraceae	g__Syncephalastrum	s__Syncephalastrum_racemosum
OTU431	SINGLETON|n=1	0	1	0
OTU432	SINGLETON|n=1	0	1	0	AB520305	SH0844758.10FU	6.70802e-071	270.731	146	1	209	318	527	191	191	91.4	98.6	212	k__Fungi	p__Basidiomycota	c__Microbotryomycetes	o__Sporidiobolales	f__Sporidiobolaceae	g__Sporobolomyces	s__Sporobolomyces_sp
OTU433	SINGLETON|n=1	0	1	0	UDB07546702	SH0993541.10FU	6.26469e-076	287.351	155	1	201	309	514	190	190	94.5	100	201	k__Fungi	p__Basidiomycota	c__Microbotryomycetes	o__Sporidiobolales	f__Sporidiobolaceae	g__Sporidiobolaceae_gen_Incertae_sedis	s__Sporidiobolaceae_sp
OTU434	SINGLETON|n=1	0	1	0	GU062229	SH0926075.10FU	3.64651e-119	431.39	233	1	255	308	561	248	248	97.3	98.5	259	k__Fungi	p__Basidiomycota	c__Basidiomycota_cls_Incertae_sedis	o__Basidiomycota_ord_Incertae_sedis	f__Basidiomycota_fam_Incertae_sedis	g__Basidiomycota_gen_Incertae_sedis	s__Basidiomycota_sp
OTU435	SINGLETON|n=1	0	1	0	MT872624	SH0912804.10FU	1.68551e-035	152.546	82	1	115	578	693	105	105	91.3	76.7	150	k__Fungi	p__Ascomycota	c__Eurotiomycetes	o__Eurotiomycetes_ord_Incertae_sedis	f__Eurotiomycetes_fam_Incertae_sedis	g__Eurotiomycetes_gen_Incertae_sedis	s__Eurotiomycetes_sp
OTU436	SINGLETON|n=1	0	1	0	MT872626	SH0912803.10FU	2.72522e-063	244.878	132	1	150	1577	1726	145	145	96.7	99.3	151	k__Fungi	p__Ascomycota	c__Eurotiomycetes	o__Eurotiomycetes_ord_Incertae_sedis	f__Eurotiomycetes_fam_Incertae_sedis	g__Eurotiomycetes_gen_Incertae_sedis	s__Eurotiomycetes_sp
OTU437	SINGLETON|n=1	0	1	0	MT872624	SH0912804.10FU	9.88068e-063	243.031	131	1	152	578	729	145	145	95.4	100	152	k__Fungi	p__Ascomycota	c__Eurotiomycetes	o__Eurotiomycetes_ord_Incertae_sedis	f__Eurotiomycetes_fam_Incertae_sedis	g__Eurotiomycetes_gen_Incertae_sedis	s__Eurotiomycetes_sp
OTU438	SINGLETON|n=1	0	1	0	KM104110	SH0967380.10FU	2.17301e-059	231.952	125	1	154	366	521	146	146	94.8	100	154	k__Fungi	p__Fungi_phy_Incertae_sedis	c__Fungi_cls_Incertae_sedis	o__Fungi_ord_Incertae_sedis	f__Fungi_fam_Incertae_sedis	g__Fungi_gen_Incertae_sedis	s__Fungi_sp
OTU439	SINGLETON|n=1	0	1	0	KY102575	SH0733981.10FU	6.82596e-051	204.252	110	65	210	413	558	134	134	91.8	69.5	210	k__Fungi	p__Basidiomycota	c__Microbotryomycetes	o__Microbotryomycetes_ord_Incertae_sedis	f__Colacogloeaceae	g__Colacogloea	s__Colacogloea_philyla
OTU440	SINGLETON|n=1	0	1	0	PP115452	SH0911881.10FU	1.40914e-092	342.75	185	1	212	308	519	203	203	95.8	99.5	213	k__Fungi	p__Basidiomycota	c__Microbotryomycetes	o__Sporidiobolales	f__Sporidiobolaceae	g__Sporobolomyces	s__Sporobolomyces_salmonicolor
OTU441	SINGLETON|n=1	0	1	0	KX148023	SH0938147.10FU	7.46304e-069	263.345	142	1	150	321	472	149	149	99.3	100	150	k__Fungi	p__Ascomycota	c__Dothideomycetes	o__Mycosphaerellales	f__Teratosphaeriaceae	g__Constantinomyces	s__Constantinomyces_sp
OTU442	SINGLETON|n=1	0	1	0	KT264384	SH0904651.10FU	4.6153e-082	307.664	166	1	194	387	578	185	185	95.4	100	194	k__Fungi	p__Ascomycota	c__Eurotiomycetes	o__Chaetothyriales	f__Herpotrichiellaceae	g__Exophiala	s__Exophiala_sp
OTU443	SINGLETON|n=1	0	1	0	EU030275	SH0828639.10FU	1.79888e-060	235.645	127	1	160	334	493	149	149	93.1	98.2	163	k__Fungi	p__Ascomycota	c__Eurotiomycetes	o__Chaetothyriales	f__Herpotrichiellaceae	g__Sorocybe	s__Sorocybe_resinae
OTU444	SINGLETON|n=1	0	1	0	MH188916	SH0926074.10FU	9.37408e-105	383.377	207	1	237	347	584	229	229	96.6	100	237	k__Fungi	p__Basidiomycota	c__Exobasidiomycetes	o__Exobasidiales	f__Exobasidiales_fam_Incertae_sedis	g__Guomyces	s__Guomyces_nicotianae
OTU445	SINGLETON|n=1	0	1	0	MH188916	SH0926074.10FU	5.66861e-102	374.144	202	1	238	347	584	227	227	95.4	100	238	k__Fungi	p__Basidiomycota	c__Exobasidiomycetes	o__Exobasidiales	f__Exobasidiales_fam_Incertae_sedis	g__Guomyces	s__Guomyces_nicotianae
OTU446	SINGLETON|n=1	0	1	0	GU062229	SH0926075.10FU	1.72073e-107	392.61	212	1	255	308	561	241	241	94.5	98.5	259	k__Fungi	p__Basidiomycota	c__Basidiomycota_cls_Incertae_sedis	o__Basidiomycota_ord_Incertae_sedis	f__Basidiomycota_fam_Incertae_sedis	g__Basidiomycota_gen_Incertae_sedis	s__Basidiomycota_sp
OTU447	SINGLETON|n=1	0	1	0	KY102575	SH0733981.10FU	9.43413e-080	300.278	162	4	231	330	558	208	208	91.2	98.7	231	k__Fungi	p__Basidiomycota	c__Microbotryomycetes	o__Microbotryomycetes_ord_Incertae_sedis	f__Colacogloeaceae	g__Colacogloea	s__Colacogloea_philyla
OTU448	SINGLETON|n=1	0	1	0	MH188916	SH0926074.10FU	9.39568e-100	366.757	198	1	236	347	584	226	226	95.8	100	236	k__Fungi	p__Basidiomycota	c__Exobasidiomycetes	o__Exobasidiales	f__Exobasidiales_fam_Incertae_sedis	g__Guomyces	s__Guomyces_nicotianae
OTU449	SINGLETON|n=1	0	1	0	KY103886	SH0880181.10FU	1.86508e-071	272.578	147	1	212	368	581	193	193	91	100	212	k__Fungi	p__Basidiomycota	c__Agaricostilbomycetes	o__Agaricostilbales	f__Kondoaceae	g__Kondoa	s__Kondoa_phyllada
OTU450	SINGLETON|n=1	0	0	1
OTU451	SINGLETON|n=1	0	0	1	UDB02746397	SH0960482.10FU	8.93213e-063	243.031	131	1	140	301	440	137	137	97.9	100	140	k__Fungi	p__Ascomycota	c__Lecanoromycetes	o__Lecanoromycetes_ord_Incertae_sedis	f__Lecanoromycetes_fam_Incertae_sedis	g__Lecanoromycetes_gen_Incertae_sedis	s__Lecanoromycetes_sp
OTU452	SINGLETON|n=1	0	0	1	LC639279	SH0946103.10FU	8.99555e-058	226.412	122	1	140	370	509	134	134	95.7	100	140	k__Fungi	p__Ascomycota	c__Leotiomycetes	o__Helotiales	f__Myxotrichaceae	g__Oidiodendron	s__Oidiodendron_griseum
OTU453	SINGLETON|n=1	0	0	1	LC646545	SH0946018.10FU	1.15544e-061	239.338	129	1	135	344	478	133	133	98.5	96.4	140	k__Fungi	p__Ascomycota	c__Leotiomycetes	o__Helotiales	f__Amorphothecaceae	g__Amorphotheca	s__Amorphotheca_resinae
OTU454	SINGLETON|n=1	0	1	0
OTU455	SINGLETON|n=1	0	0	1	LC015666	SH0960444.10FU	3.36327e-042	174.705	94	2	142	341	483	127	127	90.1	99.3	142	k__Fungi	p__Ascomycota	c__Lecanoromycetes	o__Lecanoromycetes_ord_Incertae_sedis	f__Lecanoromycetes_fam_Incertae_sedis	g__Lecanoromycetes_gen_Incertae_sedis	s__Lecanoromycetes_sp
OTU456	SINGLETON|n=1	0	0	1	UDB03126426	SH0966817.10FU	4.38849e-041	171.012	92	1	143	327	469	127	127	88.8	100	143	k__Fungi	p__Ascomycota	c__Leotiomycetes	o__Leotiales	f__Tympanidaceae	g__Claussenomyces	s__Claussenomyces_sp
OTU457	SINGLETON|n=1	0	0	1	UDB07674985	SH1012176.10FU	5.60557e-055	217.178	117	1	144	315	458	135	135	93.8	100	144	k__Fungi	p__Ascomycota	c__Leotiomycetes	o__Helotiales	f__Pezizellaceae	g__Ciliolarina	s__Ciliolarina_sp
OTU458	SINGLETON|n=1	0	1	0	UDB01788746	SH0870926.10FU	6.33407e-075	283.658	153	1	163	344	505	160	160	98.2	100	163	k__Fungi	p__Ascomycota	c__Eurotiomycetes	o__Chaetothyriales	f__Chaetothyriales_fam_Incertae_sedis	g__Chaetothyriales_gen_Incertae_sedis	s__Chaetothyriales_sp
OTU459	SINGLETON|n=1	0	0	1	UDB03610486	SH1012176.10FU	5.52681e-065	250.418	135	1	144	317	460	141	141	97.9	100	144	k__Fungi	p__Ascomycota	c__Leotiomycetes	o__Helotiales	f__Helotiales_fam_Incertae_sedis	g__Infundichalara	s__Infundichalara_sp
OTU460	SINGLETON|n=1	0	1	0	UDB02314272	SH1012259.10FU	1.53887e-070	268.884	145	1	145	317	461	145	145	100	100	145	k__Fungi	p__Ascomycota	c__Leotiomycetes	o__Helotiales	f__Pezizellaceae	g__Ciliolarina	s__Ciliolarina_sp
OTU461	SINGLETON|n=1	0	0	1	UDB07674985	SH1012176.10FU	2.57138e-063	244.878	132	1	144	315	458	140	140	97.2	100	144	k__Fungi	p__Ascomycota	c__Leotiomycetes	o__Helotiales	f__Pezizellaceae	g__Ciliolarina	s__Ciliolarina_sp
OTU462	SINGLETON|n=1	0	0	1	OK584507	SH1012176.10FU	1.19634e-061	239.338	129	1	144	381	525	140	140	97.2	100	144	k__Fungi	p__Ascomycota	c__Leotiomycetes	o__Helotiales	f__Helotiales_fam_Incertae_sedis	g__Infundichalara	s__Infundichalara_sp
OTU463	SINGLETON|n=1	0	0	1	UDB07674985	SH1012176.10FU	1.19634e-061	239.338	129	1	144	315	458	139	139	96.5	100	144	k__Fungi	p__Ascomycota	c__Leotiomycetes	o__Helotiales	f__Pezizellaceae	g__Ciliolarina	s__Ciliolarina_sp
OTU464	SINGLETON|n=1	0	0	1	UDB07674985	SH1012176.10FU	1.19634e-061	239.338	129	1	144	315	458	139	139	96.5	100	144	k__Fungi	p__Ascomycota	c__Leotiomycetes	o__Helotiales	f__Pezizellaceae	g__Ciliolarina	s__Ciliolarina_sp
OTU465	SINGLETON|n=1	0	0	1	UDB05114722	SH0950072.10FU	2.55325e-068	261.498	141	1	144	310	453	143	143	99.3	100	144	k__Fungi	p__Ascomycota	c__Dothideomycetes	o__Mycosphaerellales	f__Teratosphaeriaceae	g__Devriesia	s__Devriesia_sp
OTU466	SINGLETON|n=1	0	0	1	AY843099	SH0843083.10FU	1.53666e-065	252.265	136	1	142	313	454	140	140	98.6	98.6	144	k__Fungi	p__Ascomycota	c__Dothideomycetes	o__Capnodiales	f__Capnodiales_fam_Incertae_sedis	g__Capnodiales_gen_Incertae_sedis	s__Capnodiales_sp
OTU467	SINGLETON|n=1	0	0	1	UDB04470396	SH0966602.10FU	2.55325e-068	261.498	141	1	144	326	469	143	143	99.3	100	144	k__Fungi	p__Ascomycota	c__Leotiomycetes	o__Helotiales	f__Dermateaceae	g__Cryptosporiopsis	s__Cryptosporiopsis_sp
OTU468	SINGLETON|n=1	0	0	1	UDB07674985	SH1012176.10FU	2.58963e-058	228.258	123	1	144	315	458	137	137	95.1	100	144	k__Fungi	p__Ascomycota	c__Leotiomycetes	o__Helotiales	f__Pezizellaceae	g__Ciliolarina	s__Ciliolarina_sp
OTU469	SINGLETON|n=1	0	0	1	OR036383	SH0945270.10FU	2.55325e-068	261.498	141	1	144	314	457	143	143	99.3	100	144	k__Fungi	p__Ascomycota	c__Leotiomycetes	o__Leotiales	f__Tympanidaceae	g__Pragmopora	s__Pragmopora_sp
OTU470	SINGLETON|n=1	0	0	1	UDB07499237	SH1012135.10FU	7.21049e-064	246.725	133	1	145	317	461	141	141	97.2	100	145	k__Fungi	p__Ascomycota	c__Leotiomycetes	o__Helotiales	f__Pezizellaceae	g__Xenopolyscytalum	s__Xenopolyscytalum_sp
OTU471	SINGLETON|n=1	0	1	0	OR069551	SH0767731.10FU	2.90362e-073	278.118	150	1	161	331	493	159	159	98.8	100	161	k__Fungi	p__Ascomycota	c__Eurotiomycetes	o__Eurotiales	f__Aspergillaceae	g__Penicillium	s__Penicillium_corylophilum
OTU472	SINGLETON|n=1	0	0	1	UDB03608770	SH1012176.10FU	2.00479e-064	248.571	134	1	137	317	453	136	136	99.3	94.5	145	k__Fungi	p__Ascomycota	c__Leotiomycetes	o__Helotiales	f__Helotiales_fam_Incertae_sedis	g__Infundichalara	s__Infundichalara_sp
OTU473	SINGLETON|n=1	0	1	0	OR069551	SH0767731.10FU	3.81213e-072	274.424	148	1	163	331	493	158	158	96.9	100	163	k__Fungi	p__Ascomycota	c__Eurotiomycetes	o__Eurotiales	f__Aspergillaceae	g__Penicillium	s__Penicillium_corylophilum
OTU474	SINGLETON|n=1	0	1	0	OR069551	SH0767731.10FU	3.81213e-072	274.424	148	1	163	331	493	158	158	96.9	100	163	k__Fungi	p__Ascomycota	c__Eurotiomycetes	o__Eurotiales	f__Aspergillaceae	g__Penicillium	s__Penicillium_corylophilum
OTU475	SINGLETON|n=1	0	0	1	AY843109	SH0938058.10FU	2.00752e-069	265.191	143	1	146	311	456	145	145	99.3	100	146	k__Fungi	p__Ascomycota	c__Dothideomycetes	o__Mycosphaerellales	f__Teratosphaeriaceae	g__Constantinomyces	s__Constantinomyces_nebulosus
OTU476	SINGLETON|n=1	0	0	1	UDB02020736	SH0843027.10FU	2.02178e-064	248.571	134	1	146	305	450	142	142	97.3	100	146	k__Fungi	p__Ascomycota	c__Dothideomycetes	o__Mycosphaerellales	f__Teratosphaeriaceae	g__Neocatenulostroma	s__Neocatenulostroma_sp
OTU477	SINGLETON|n=1	0	0	1	UDB04349073	SH0846887.10FU	2.05324e-059	231.952	125	1	128	334	461	127	127	99.2	87.1	147	k__Fungi	p__Ascomycota	c__Pezizomycotina_cls_Incertae_sedis	o__Pezizomycotina_ord_Incertae_sedis	f__Pezizomycotina_fam_Incertae_sedis	g__Pezizomycotina_gen_Incertae_sedis	s__Pezizomycotina_sp
OTU478	SINGLETON|n=1	0	0	1	MK584975	SH0908381.10FU	4.48152e-056	220.872	119	1	140	429	568	133	133	95	94.6	148	k__Fungi	p__Ascomycota	c__Leotiomycetes	o__Helotiales	f__Hyaloscyphaceae	g__Scolecolachnum	s__Scolecolachnum_nigricans
OTU479	SINGLETON|n=1	0	0	1	UDB0747127	SH0763677.10FU	3.41575e-067	257.805	139	1	148	323	470	145	145	98	100	148	k__Fungi	p__Ascomycota	c__Dothideomycetes	o__Mycosphaerellales	f__Neodevriesiaceae	g__Neodevriesia	s__Neodevriesia_sp
OTU480	SINGLETON|n=1	0	0	1	MT872624	SH0912804.10FU	6.01289e-035	150.699	81	1	149	578	729	129	129	86.6	100	149	k__Fungi	p__Ascomycota	c__Eurotiomycetes	o__Eurotiomycetes_ord_Incertae_sedis	f__Eurotiomycetes_fam_Incertae_sedis	g__Eurotiomycetes_gen_Incertae_sedis	s__Eurotiomycetes_sp
OTU481	SINGLETON|n=1	0	0	1	OQ383503	SH0966706.10FU	4.4867e-061	237.491	128	1	149	312	460	142	142	95.3	100	149	k__Fungi	p__Ascomycota	c__Leotiomycetes	o__Leotiales	f__Tympanidaceae	g__Pragmopora	s__Pragmopora_sp
OTU482	SINGLETON|n=1	0	0	1
OTU483	SINGLETON|n=1	0	0	1	MT872624	SH0912804.10FU	3.49686e-062	241.185	130	1	150	578	729	145	145	96.7	100	150	k__Fungi	p__Ascomycota	c__Eurotiomycetes	o__Eurotiomycetes_ord_Incertae_sedis	f__Eurotiomycetes_fam_Incertae_sedis	g__Eurotiomycetes_gen_Incertae_sedis	s__Eurotiomycetes_sp
OTU484	SINGLETON|n=1	0	0	1	MT872624	SH0912804.10FU	7.95367e-024	113.766	61	1	150	578	729	122	122	81.3	100	150	k__Fungi	p__Ascomycota	c__Eurotiomycetes	o__Eurotiomycetes_ord_Incertae_sedis	f__Eurotiomycetes_fam_Incertae_sedis	g__Eurotiomycetes_gen_Incertae_sedis	s__Eurotiomycetes_sp
OTU485	SINGLETON|n=1	0	0	1
OTU486	SINGLETON|n=1	0	0	1
OTU487	SINGLETON|n=1	0	0	1	MT872624	SH0912804.10FU	3.62277e-037	158.086	85	1	150	578	729	130	130	86.7	100	150	k__Fungi	p__Ascomycota	c__Eurotiomycetes	o__Eurotiomycetes_ord_Incertae_sedis	f__Eurotiomycetes_fam_Incertae_sedis	g__Eurotiomycetes_gen_Incertae_sedis	s__Eurotiomycetes_sp
OTU488	SINGLETON|n=1	0	0	1	MT872624	SH0912804.10FU	7.78664e-039	163.625	88	1	115	578	693	107	107	93	76.7	150	k__Fungi	p__Ascomycota	c__Eurotiomycetes	o__Eurotiomycetes_ord_Incertae_sedis	f__Eurotiomycetes_fam_Incertae_sedis	g__Eurotiomycetes_gen_Incertae_sedis	s__Eurotiomycetes_sp
OTU489	SINGLETON|n=1	0	0	1	MT872624	SH0912804.10FU	1.02162e-027	126.692	68	1	122	578	700	105	105	86.1	81.3	150	k__Fungi	p__Ascomycota	c__Eurotiomycetes	o__Eurotiomycetes_ord_Incertae_sedis	f__Eurotiomycetes_fam_Incertae_sedis	g__Eurotiomycetes_gen_Incertae_sedis	s__Eurotiomycetes_sp
OTU490	SINGLETON|n=1	0	0	1	UDB05247480	SH0740742.10FU	1.28467e-046	189.479	102	1	150	347	497	135	135	90	100	150	k__Fungi	p__Ascomycota	c__Dothideomycetes	o__Dothideales	f__Dothideales_fam_Incertae_sedis	g__Pringsheimia	s__Pringsheimia_sp
OTU491	SINGLETON|n=1	0	0	1	FR682353	SH0763657.10FU	5.76928e-070	267.038	144	1	150	328	478	149	149	99.3	100	150	k__Fungi	p__Ascomycota	c__Dothideomycetes	o__Mycosphaerellales	f__Neodevriesiaceae	g__Neodevriesia	s__Neodevriesia_knoxdaviesii
OTU492	SINGLETON|n=1	0	0	1
OTU493	SINGLETON|n=1	0	0	1
OTU494	SINGLETON|n=1	0	0	1
OTU495	SINGLETON|n=1	0	0	1
OTU496	SINGLETON|n=1	0	0	1	MT872624	SH0912804.10FU	7.79461e-044	180.245	97	1	151	578	729	134	134	88.7	100	151	k__Fungi	p__Ascomycota	c__Eurotiomycetes	o__Eurotiomycetes_ord_Incertae_sedis	f__Eurotiomycetes_fam_Incertae_sedis	g__Eurotiomycetes_gen_Incertae_sedis	s__Eurotiomycetes_sp
OTU497	SINGLETON|n=1	0	0	1	UDB02024631	SH0851402.10FU	9.87122e-058	226.412	122	1	150	323	470	141	141	94	99.3	151	k__Fungi	p__Ascomycota	c__Dothideomycetes	o__Mycosphaerellales	f__Neodevriesiaceae	g__Neodevriesia	s__Neodevriesia_sp
OTU498	SINGLETON|n=1	0	0	1	MT872626	SH0912803.10FU	5.90472e-065	250.418	135	1	148	1577	1723	144	144	97.3	97.4	152	k__Fungi	p__Ascomycota	c__Eurotiomycetes	o__Eurotiomycetes_ord_Incertae_sedis	f__Eurotiomycetes_fam_Incertae_sedis	g__Eurotiomycetes_gen_Incertae_sedis	s__Eurotiomycetes_sp
OTU499	SINGLETON|n=1	0	0	1	MT872624	SH0912804.10FU	4.56462e-066	254.111	137	1	152	578	729	147	147	96.7	100	152	k__Fungi	p__Ascomycota	c__Eurotiomycetes	o__Eurotiomycetes_ord_Incertae_sedis	f__Eurotiomycetes_fam_Incertae_sedis	g__Eurotiomycetes_gen_Incertae_sedis	s__Eurotiomycetes_sp
OTU500	SINGLETON|n=1	0	0	1	MT872624	SH0912804.10FU	4.56462e-066	254.111	137	1	152	578	729	147	147	96.7	100	152	k__Fungi	p__Ascomycota	c__Eurotiomycetes	o__Eurotiomycetes_ord_Incertae_sedis	f__Eurotiomycetes_fam_Incertae_sedis	g__Eurotiomycetes_gen_Incertae_sedis	s__Eurotiomycetes_sp
OTU501	SINGLETON|n=1	0	0	1	MT872624	SH0912804.10FU	4.56462e-066	254.111	137	1	152	578	729	147	147	96.7	100	152	k__Fungi	p__Ascomycota	c__Eurotiomycetes	o__Eurotiomycetes_ord_Incertae_sedis	f__Eurotiomycetes_fam_Incertae_sedis	g__Eurotiomycetes_gen_Incertae_sedis	s__Eurotiomycetes_sp
OTU502	SINGLETON|n=1	0	0	1	MT809296	SH0737869.10FU	4.56462e-066	254.111	137	1	152	352	503	147	147	96.7	100	152	k__Fungi	p__Ascomycota	c__Sareomycetes	o__Sareales	f__Sareaceae	g__Sarea	s__Sarea_sp
OTU503	SINGLETON|n=1	1	0	0	MH188916	SH0926074.10FU	2.61876e-105	385.223	208	1	238	347	584	229	229	96.2	100	238	k__Fungi	p__Basidiomycota	c__Exobasidiomycetes	o__Exobasidiales	f__Exobasidiales_fam_Incertae_sedis	g__Guomyces	s__Guomyces_nicotianae
OTU504	SINGLETON|n=1	0	0	1	MG520949	SH0740652.10FU	2.73027e-073	278.118	150	1	153	410	562	152	152	99.3	100	153	k__Fungi	p__Ascomycota	c__Dothideomycetes	o__Pleosporales	f__Phaeosphaeriaceae	g__Pseudoophiobolus	s__Pseudoophiobolus_mathieui
OTU505	SINGLETON|n=1	0	0	1	OQ718080	SH0738016.10FU	7.69934e-064	246.725	133	3	153	374	525	146	146	96.7	98.7	153	k__Fungi	p__Ascomycota	c__Sareomycetes	o__Sareales	f__Sareaceae	g__Sarea	s__Sarea_coeloplata
OTU506	SINGLETON|n=1	0	0	1	UDB01381858	SH0905238.10FU	8.27063e-019	97.1461	52	2	92	323	413	80	80	87.9	59.1	154	k__Fungi	p__Ascomycota	c__Ascomycota_cls_Incertae_sedis	o__Ascomycota_ord_Incertae_sedis	f__Ascomycota_fam_Incertae_sedis	g__Ascomycota_gen_Incertae_sedis	s__Ascomycota_sp
OTU507	SINGLETON|n=1	0	0	1	LC646009	SH0924986.10FU	1.00536e-072	276.271	149	1	155	322	476	153	153	98.7	99.4	156	k__Fungi	p__Ascomycota	c__Dothideomycetes	o__Mytilinidiales	f__Mytilinidiaceae	g__Lophium	s__Lophium_arboricola
OTU508	SINGLETON|n=1	0	0	1	UDB03977820	SH0903477.10FU	3.64395e-072	274.424	148	1	156	333	490	155	155	99.4	99.4	157	k__Fungi	p__Ascomycota	c__Eurotiomycetes	o__Eurotiales	f__Aspergillaceae	g__Penicillium	s__Penicillium_sp
OTU509	SINGLETON|n=1	0	0	1	PP033949	SH0960075.10FU	3.61826e-077	291.044	157	1	157	305	461	157	157	100	100	157	k__Fungi	p__Ascomycota	c__Dothideomycetes	o__Pleosporales	f__Coniothyriaceae	g__Coniothyrium	s__Coniothyrium_telephii
OTU510	SINGLETON|n=1	0	0	1	OR752063	SH0856613.10FU	1.01375e-077	292.891	158	1	158	368	525	158	158	100	100	158	k__Fungi	p__Ascomycota	c__Dothideomycetes	o__Pleosporales	f__Pleosporaceae	g__Alternaria	s__Alternaria_infectoria
OTU511	SINGLETON|n=1	0	0	1	MT813950	SH0950131.10FU	3.72628e-067	257.805	139	1	155	217	370	151	151	97.4	97.5	159	k__Fungi	p__Ascomycota	c__Xylonomycetes	o__Symbiotaphrinales	f__Symbiotaphrinaceae	g__Symbiotaphrina	s__Symbiotaphrina_microtheca
OTU512	SINGLETON|n=1	1	0	0	OR687493	SH1022674.10FU	4.9084e-107	390.763	211	1	211	302	512	211	211	100	100	211	k__Fungi	p__Basidiomycota	c__Microbotryomycetes	o__Leucosporidiales	f__Leucosporidiaceae	g__Leucosporidium	s__Leucosporidium_scottii
OTU513	SINGLETON|n=1	0	0	1	MZ133732	SH0875505.10FU	6.41738e-050	200.558	108	4	160	424	584	144	144	91.7	98.1	160	k__Fungi	p__Ascomycota	c__Eurotiomycetes	o__Onygenales	f__Gymnoascaceae	g__Gymnoascus	s__Gymnoascus_halophilus
OTU514	SINGLETON|n=1	1	0	0	DQ870625	SH0880564.10FU	7.94367e-061	237.491	128	1	238	356	590	207	207	87	97.9	243	k__Fungi	p__Basidiomycota	c__Microbotryomycetes	o__Microbotryomycetes_ord_Incertae_sedis	f__Colacogloeaceae	g__Colacogloea	s__Colacogloea_subericola
OTU515	SINGLETON|n=1	0	0	1	OR827162	SH0740100.10FU	3.72804e-072	274.424	148	1	160	364	523	156	156	97.5	100	160	k__Fungi	p__Ascomycota	c__Sordariomycetes	o__Hypocreales	f__Cordycipitaceae	g__Beauveria	s__Beauveria_pseudobassiana
OTU516	SINGLETON|n=1	1	0	0	MN071391	SH1043354.10FU	1.88419e-101	372.297	201	1	222	297	518	215	215	96.8	100	222	k__Fungi	p__Fungi_phy_Incertae_sedis	c__Fungi_cls_Incertae_sedis	o__Fungi_ord_Incertae_sedis	f__Fungi_fam_Incertae_sedis	g__Fungi_gen_Incertae_sedis	s__Fungi_sp
OTU517	SINGLETON|n=1	0	0	1	OR793058	SH0767731.10FU	6.28523e-070	267.038	144	1	160	362	519	155	155	96.9	99.4	161	k__Fungi	p__Ascomycota	c__Eurotiomycetes	o__Eurotiales	f__Aspergillaceae	g__Penicillium	s__Penicillium_fundyense
OTU518	SINGLETON|n=1	0	0	1	LC272919	SH0915560.10FU	1.77307e-065	252.265	136	1	162	362	525	155	155	95.7	100	162	k__Fungi	p__Ascomycota	c__Dothideomycetes	o__Myriangiales	f__Myriangiales_fam_Incertae_sedis	g__Myriangiales_gen_Incertae_sedis	s__Myriangiales_sp
OTU519	SINGLETON|n=1	0	0	1	MN862667	SH0868842.10FU	6.33214e-070	267.038	144	1	162	415	576	156	156	96.3	100	162	k__Fungi	p__Ascomycota	c__Ascomycota_cls_Incertae_sedis	o__Ascomycota_ord_Incertae_sedis	f__Ascomycota_fam_Incertae_sedis	g__Ascomycota_gen_Incertae_sedis	s__Ascomycota_sp
OTU520	SINGLETON|n=1	1	0	0	GU062229	SH0926075.10FU	6.02299e-117	424.003	229	1	252	308	561	246	246	97.6	98.4	256	k__Fungi	p__Basidiomycota	c__Basidiomycota_cls_Incertae_sedis	o__Basidiomycota_ord_Incertae_sedis	f__Basidiomycota_fam_Incertae_sedis	g__Basidiomycota_gen_Incertae_sedis	s__Basidiomycota_sp
OTU521	SINGLETON|n=1	0	0	1
OTU522	SINGLETON|n=1	1	0	0	GU062229	SH0926075.10FU	3.69847e-109	398.15	215	1	255	308	561	242	242	94.9	98.5	259	k__Fungi	p__Basidiomycota	c__Basidiomycota_cls_Incertae_sedis	o__Basidiomycota_ord_Incertae_sedis	f__Basidiomycota_fam_Incertae_sedis	g__Basidiomycota_gen_Incertae_sedis	s__Basidiomycota_sp
OTU523	SINGLETON|n=1	0	0	1	EU030275	SH0828639.10FU	8.3694e-059	230.105	124	19	160	352	493	136	136	95.8	87.1	163	k__Fungi	p__Ascomycota	c__Eurotiomycetes	o__Chaetothyriales	f__Herpotrichiellaceae	g__Sorocybe	s__Sorocybe_resinae
OTU524	SINGLETON|n=1	1	0	0	GU062229	SH0926075.10FU	7.8933e-116	420.31	227	1	255	308	561	246	246	96.5	98.5	259	k__Fungi	p__Basidiomycota	c__Basidiomycota_cls_Incertae_sedis	o__Basidiomycota_ord_Incertae_sedis	f__Basidiomycota_fam_Incertae_sedis	g__Basidiomycota_gen_Incertae_sedis	s__Basidiomycota_sp
OTU525	SINGLETON|n=1	0	0	1	OR091314	SH0801460.10FU	6.37904e-070	267.038	144	1	163	347	507	157	157	96.3	100	163	k__Fungi	p__Ascomycota	c__Eurotiomycetes	o__Phaeomoniellales	f__Celotheliaceae	g__Phaeomoniella	s__Phaeomoniella_sp
OTU526	SINGLETON|n=1	0	0	1	LC646014	SH0801449.10FU	1.74869e-080	302.124	163	1	163	348	510	163	163	100	100	163	k__Fungi	p__Ascomycota	c__Eurotiomycetes	o__Phaeomoniellales	f__Celotheliaceae	g__Phaeomoniella	s__Phaeomoniella_sp
OTU527	SINGLETON|n=1	0	0	1	OR069551	SH0767731.10FU	3.81213e-072	274.424	148	1	163	331	493	158	158	96.9	100	163	k__Fungi	p__Ascomycota	c__Eurotiomycetes	o__Eurotiales	f__Aspergillaceae	g__Penicillium	s__Penicillium_corylophilum
OTU528	SINGLETON|n=1	0	0	1	EU030275	SH0828639.10FU	1.7862e-065	252.265	136	1	160	334	493	152	152	95	98.2	163	k__Fungi	p__Ascomycota	c__Eurotiomycetes	o__Chaetothyriales	f__Herpotrichiellaceae	g__Sorocybe	s__Sorocybe_resinae
OTU529	SINGLETON|n=1	0	0	1	EU030275	SH0828639.10FU	3.83919e-067	257.805	139	1	160	334	493	153	153	95.6	98.2	163	k__Fungi	p__Ascomycota	c__Eurotiomycetes	o__Chaetothyriales	f__Herpotrichiellaceae	g__Sorocybe	s__Sorocybe_resinae
OTU530	SINGLETON|n=1	0	0	1	EU030275	SH0828639.10FU	1.7862e-065	252.265	136	1	160	334	493	152	152	95	98.2	163	k__Fungi	p__Ascomycota	c__Eurotiomycetes	o__Chaetothyriales	f__Herpotrichiellaceae	g__Sorocybe	s__Sorocybe_resinae
OTU531	SINGLETON|n=1	0	0	1	EU030275	SH0828639.10FU	1.7862e-065	252.265	136	1	160	334	493	152	152	95	98.2	163	k__Fungi	p__Ascomycota	c__Eurotiomycetes	o__Chaetothyriales	f__Herpotrichiellaceae	g__Sorocybe	s__Sorocybe_resinae
OTU532	SINGLETON|n=1	0	0	1	OR069551	SH0767731.10FU	3.81213e-072	274.424	148	1	163	331	493	158	158	96.9	100	163	k__Fungi	p__Ascomycota	c__Eurotiomycetes	o__Eurotiales	f__Aspergillaceae	g__Penicillium	s__Penicillium_corylophilum
OTU533	SINGLETON|n=1	0	0	1	OR069551	SH0767731.10FU	2.94696e-073	278.118	150	1	162	331	492	158	158	97.5	99.4	163	k__Fungi	p__Ascomycota	c__Eurotiomycetes	o__Eurotiales	f__Aspergillaceae	g__Penicillium	s__Penicillium_corylophilum
OTU534	SINGLETON|n=1	0	0	1	OR069551	SH0767731.10FU	3.81213e-072	274.424	148	1	163	331	493	158	158	96.9	100	163	k__Fungi	p__Ascomycota	c__Eurotiomycetes	o__Eurotiales	f__Aspergillaceae	g__Penicillium	s__Penicillium_corylophilum
OTU535	SINGLETON|n=1	0	0	1	OR069551	SH0767731.10FU	1.38117e-071	272.578	147	1	162	331	492	157	157	96.9	98.8	164	k__Fungi	p__Ascomycota	c__Eurotiomycetes	o__Eurotiales	f__Aspergillaceae	g__Penicillium	s__Penicillium_corylophilum
OTU536	SINGLETON|n=1	1	0	0	GU062229	SH0926075.10FU	1.68924e-117	425.85	230	1	254	308	561	246	246	96.9	98.4	258	k__Fungi	p__Basidiomycota	c__Basidiomycota_cls_Incertae_sedis	o__Basidiomycota_ord_Incertae_sedis	f__Basidiomycota_fam_Incertae_sedis	g__Basidiomycota_gen_Incertae_sedis	s__Basidiomycota_sp
OTU537	SINGLETON|n=1	0	0	1	FJ897698	SH0882528.10FU	1.38144e-076	289.198	156	1	162	160	321	160	160	98.8	98.2	165	k__Fungi	p__Ascomycota	c__Eurotiomycetes	o__Onygenales	f__Ajellomycetaceae	g__Histoplasma	s__Histoplasma_capsulatum
OTU538	SINGLETON|n=1	0	0	1	MK782435	SH0905449.10FU	1.39125e-071	272.578	147	1	165	771	935	159	159	96.4	100	165	k__Fungi	p__Ascomycota	c__Leotiomycetes	o__Helotiales	f__Mollisiaceae	g__Phialocephala	s__Phialocephala_fluminis
OTU539	SINGLETON|n=1	0	0	1	MK782435	SH0905449.10FU	2.31164e-074	281.811	152	8	165	778	935	156	156	98.7	95.8	165	k__Fungi	p__Ascomycota	c__Leotiomycetes	o__Helotiales	f__Mollisiaceae	g__Phialocephala	s__Phialocephala_fluminis
OTU540	SINGLETON|n=1	0	0	1	OR623243	SH0958738.10FU	5.04008e-071	270.731	146	1	166	289	451	160	160	96.4	100	166	k__Fungi	p__Ascomycota	c__Saccharomycetes	o__Saccharomycetales	f__Trichomonascaceae	g__Blastobotrys	s__Blastobotrys_sp
OTU541	SINGLETON|n=1	0	0	1	UDB03955738	SH0939707.10FU	6.56604e-065	250.418	135	2	166	327	492	156	156	94.5	99.4	166	k__Fungi	p__Ascomycota	c__Eurotiomycetes	o__Eurotiales	f__Aspergillaceae	g__Penicillium	s__Penicillium_sp
OTU542	SINGLETON|n=1	0	0	1	MH861711	SH0901488.10FU	1.08329e-072	276.271	149	1	165	897	1059	160	160	97	99.4	166	k__Fungi	p__Ascomycota	c__Eurotiomycetes	o__Eurotiales	f__Trichocomaceae	g__Talaromyces	s__Talaromyces_rademirici
OTU543	SINGLETON|n=1	0	0	1	MZ573462	SH0735889.10FU	6.66009e-075	283.658	153	1	170	446	618	167	167	98.2	100	170	k__Fungi	p__Ascomycota	c__Dothideomycetes	o__Venturiales	f__Sympoventuriaceae	g__Ochroconis	s__Ochroconis_sp
OTU544	SINGLETON|n=1	0	0	1	UDB04472691	SH0912325.10FU	2.41129e-084	315.051	170	1	173	274	446	172	172	99.4	100	173	k__Fungi	p__Basidiomycota	c__Tremellomycetes	o__Tremellales	f__Cuniculitremaceae	g__Cuniculitrema	s__Cuniculitrema_sp
OTU545	SINGLETON|n=1	1	0	0	OP023249	SH0734755.10FU	3.47559e-093	344.597	186	1	192	412	603	190	190	99	100	192	k__Fungi	p__Basidiomycota	c__Agaricomycetes	o__Russulales	f__Peniophoraceae	g__Peniophora	s__Peniophora_sp
OTU546	SINGLETON|n=1	0	0	1	MZ016618	SH0976976.10FU	4.17312e-082	307.664	166	1	178	360	537	174	174	97.8	100	178	k__Fungi	p__Fungi_phy_Incertae_sedis	c__Fungi_cls_Incertae_sedis	o__Fungi_ord_Incertae_sedis	f__Fungi_fam_Incertae_sedis	g__Fungi_gen_Incertae_sedis	s__Fungi_sp
OTU547	SINGLETON|n=1	0	0	1	AY795853	SH0838720.10FU	1.22594e-057	226.412	122	1	177	326	500	160	160	90.4	97.8	181	k__Fungi	p__Ascomycota	c__Eurotiomycetes	o__Mycocaliciales	f__Mycocaliciaceae	g__Chaenothecopsis	s__Chaenothecopsis_debilis
OTU548	SINGLETON|n=1	0	0	1	UDB07673531	SH1004753.10FU	1.95232e-090	335.364	181	1	181	404	584	181	181	100	100	181	k__Fungi	p__Basidiomycota	c__Agaricomycetes	o__Hymenochaetales	f__Schizoporaceae	g__Hyphodontia	s__Hyphodontia_subalutacea
OTU549	SINGLETON|n=1	0	0	1	OR885026	SH0747765.10FU	1.18262e-087	326.131	176	1	182	415	596	180	180	98.9	100	182	k__Fungi	p__Mucoromycota	c__Mucoromycetes	o__Mucorales	f__Mucoraceae	g__Mucor	s__Mucor_pseudolusitanicus
OTU550	SINGLETON|n=1	0	0	1
OTU551	SINGLETON|n=1	0	0	1	UDB0748894	SH0750559.10FU	4.71995e-027	124.846	67	42	181	352	489	117	117	83.6	75.7	185	k__Fungi	p__Fungi_phy_Incertae_sedis	c__Fungi_cls_Incertae_sedis	o__Fungi_ord_Incertae_sedis	f__Fungi_fam_Incertae_sedis	g__Fungi_gen_Incertae_sedis	s__Fungi_sp
OTU552	SINGLETON|n=1	0	0	1	AY156968	SH0974837.10FU	1.25364e-077	292.891	158	1	189	365	557	183	183	96.8	100	189	k__Fungi	p__Ascomycota	c__Eurotiomycetes	o__Chaetothyriales	f__Herpotrichiellaceae	g__Capronia	s__Capronia_epimyces
OTU553	SINGLETON|n=1	0	0	1	UDB04294304	SH0970640.10FU	1.34431e-032	143.312	77	1	183	308	483	149	149	81.4	96.3	190	k__Fungi	p__Ascomycota	c__Sordariomycetes	o__Microascales	f__Microascaceae	g__Petriellopsis	s__Petriellopsis_sp
OTU554	SINGLETON|n=1	0	0	1	UDB01625522	SH0976908.10FU	2.73041e-074	281.811	152	1	190	350	542	180	180	94.7	100	190	k__Fungi	p__Ascomycota	c__Eurotiomycetes	o__Chaetothyriales	f__Herpotrichiellaceae	g__Capronia	s__Capronia_sp
OTU555	SINGLETON|n=1	0	0	1	UDB05051204	SH0887078.10FU	1.61865e-086	322.437	174	1	191	358	550	187	187	97.9	100	191	k__Fungi	p__Ascomycota	c__Saccharomycetes	o__Saccharomycetales	f__Debaryomycetaceae	g__Debaryomyces	s__Debaryomyces_sp
OTU556	SINGLETON|n=1	0	0	1
OTU557	SINGLETON|n=1	0	0	1	KJ706436	SH0887078.10FU	4.55533e-087	324.284	175	1	193	399	591	187	187	96.9	100	193	k__Fungi	p__Ascomycota	c__Saccharomycetes	o__Saccharomycetales	f__Debaryomycetaceae	g__Debaryomyces	s__Debaryomyces_hansenii
OTU558	SINGLETON|n=1	0	0	1
OTU559	SINGLETON|n=1	0	0	1
OTU560	SINGLETON|n=1	0	0	1	FJ235127	SH0892767.10FU	6.01266e-076	287.351	155	1	191	407	597	179	179	93.7	98.5	194	k__Fungi	p__Ascomycota	c__Saccharomycetes	o__Saccharomycetales	f__Saccharomycetales_fam_Incertae_sedis	g__Candida	s__Candida_keroseneae
OTU561	SINGLETON|n=1	0	0	1	FJ235127	SH0892767.10FU	2.75812e-084	315.051	170	1	194	407	600	186	186	95.9	100	194	k__Fungi	p__Ascomycota	c__Saccharomycetes	o__Saccharomycetales	f__Saccharomycetales_fam_Incertae_sedis	g__Candida	s__Candida_keroseneae
OTU562	SINGLETON|n=1	0	0	1	OR708694	SH0734441.10FU	3.51384e-098	361.217	195	1	195	342	536	195	195	100	100	195	k__Fungi	p__Basidiomycota	c__Agaricomycetes	o__Phallales	f__Phallaceae	g__Phallus	s__Phallus_impudicus
OTU563	SINGLETON|n=1	1	0	0	MT872624	SH0912804.10FU	3.52529e-062	241.185	130	1	151	578	729	145	145	96	100	151	k__Fungi	p__Ascomycota	c__Eurotiomycetes	o__Eurotiomycetes_ord_Incertae_sedis	f__Eurotiomycetes_fam_Incertae_sedis	g__Eurotiomycetes_gen_Incertae_sedis	s__Eurotiomycetes_sp
OTU564	SINGLETON|n=1	0	0	1	MW724320	SH0986904.10FU	6.52305e-031	137.772	74	1	148	407	551	128	128	86.5	75.1	197	k__Fungi	p__Ascomycota	c__Eurotiomycetes	o__Chaetothyriales	f__Herpotrichiellaceae	g__Exophiala	s__Exophiala_sp
OTU565	SINGLETON|n=1	0	0	1	MW822599	SH0858492.10FU	7.82224e-100	366.757	198	1	201	399	599	200	200	99.5	100	201	k__Fungi	p__Basidiomycota	c__Agaricomycetes	o__Agaricales	f__Psathyrellaceae	g__Coprinopsis	s__Coprinopsis_pseudonivea
OTU566	SINGLETON|n=1	1	0	0	MT872624	SH0912804.10FU	1.29239e-036	156.239	84	1	149	578	729	130	130	87.2	100	149	k__Fungi	p__Ascomycota	c__Eurotiomycetes	o__Eurotiomycetes_ord_Incertae_sedis	f__Eurotiomycetes_fam_Incertae_sedis	g__Eurotiomycetes_gen_Incertae_sedis	s__Eurotiomycetes_sp
OTU567	SINGLETON|n=1	1	0	0	OR623243	SH0958738.10FU	3.07699e-068	261.498	141	1	168	289	451	160	160	95.2	100	168	k__Fungi	p__Ascomycota	c__Saccharomycetes	o__Saccharomycetales	f__Trichomonascaceae	g__Blastobotrys	s__Blastobotrys_sp
OTU568	SINGLETON|n=1	0	0	1	MT223780	SH0934675.10FU	1.04248e-093	346.444	187	1	205	338	542	199	199	97.1	100	205	k__Fungi	p__Basidiomycota	c__Exobasidiomycetes	o__Exobasidiales	f__Exobasidiaceae	g__Arcticomyces	s__Arcticomyces_warmingii
OTU569	SINGLETON|n=1	1	0	0	OR387067	SH0974819.10FU	1.42669e-102	375.99	203	1	218	363	580	213	213	97.7	100	218	k__Fungi	p__Ascomycota	c__Eurotiomycetes	o__Chaetothyriales	f__Herpotrichiellaceae	g__Exophiala	s__Exophiala_dermatitidis
OTU570	SINGLETON|n=1	0	0	1	UDB0207502	SH0840832.10FU	2.37351e-070	268.884	145	1	209	323	530	190	190	90.9	100	209	k__Fungi	p__Basidiomycota	c__Microbotryomycetes	o__Sporidiobolales	f__Sporidiobolaceae	g__Rhodotorula	s__Rhodotorula_sp
OTU571	SINGLETON|n=1	0	0	1	PP115452	SH0911881.10FU	1.80999e-096	355.677	192	1	213	308	520	206	206	96.7	100	213	k__Fungi	p__Basidiomycota	c__Microbotryomycetes	o__Sporidiobolales	f__Sporidiobolaceae	g__Sporobolomyces	s__Sporobolomyces_salmonicolor
OTU572	SINGLETON|n=1	0	0	1	OQ694453	SH0899106.10FU	1.47024e-062	243.031	131	1	213	442	652	190	190	89.2	100	213	k__Fungi	p__Basidiomycota	c__Agaricostilbomycetes	o__Agaricostilbales	f__Chionosphaeraceae	g__Chionosphaera	s__Chionosphaera_cuniculicola
OTU573	SINGLETON|n=1	0	0	1	PP115452	SH0911881.10FU	3.97377e-083	311.357	168	1	213	308	520	200	200	93.9	100	213	k__Fungi	p__Basidiomycota	c__Microbotryomycetes	o__Sporidiobolales	f__Sporidiobolaceae	g__Sporobolomyces	s__Sporobolomyces_salmonicolor
OTU574	SINGLETON|n=1	0	0	1	OR387067	SH0974819.10FU	1.44434e-097	359.37	194	1	219	363	580	211	211	96.3	100	219	k__Fungi	p__Ascomycota	c__Eurotiomycetes	o__Chaetothyriales	f__Herpotrichiellaceae	g__Exophiala	s__Exophiala_dermatitidis
OTU575	SINGLETON|n=1	0	0	1	OR387067	SH0974819.10FU	3.10442e-099	364.91	197	1	219	363	580	212	212	96.8	100	219	k__Fungi	p__Ascomycota	c__Eurotiomycetes	o__Chaetothyriales	f__Herpotrichiellaceae	g__Exophiala	s__Exophiala_dermatitidis
OTU576	SINGLETON|n=1	0	0	1	OR387067	SH0974819.10FU	6.71988e-096	353.83	191	1	219	363	580	210	210	95.9	100	219	k__Fungi	p__Ascomycota	c__Eurotiomycetes	o__Chaetothyriales	f__Herpotrichiellaceae	g__Exophiala	s__Exophiala_dermatitidis
OTU577	SINGLETON|n=1	0	0	1	MN071391	SH1043354.10FU	8.7663e-100	366.757	198	1	222	297	518	214	214	96.4	100	222	k__Fungi	p__Fungi_phy_Incertae_sedis	c__Fungi_cls_Incertae_sedis	o__Fungi_ord_Incertae_sedis	f__Fungi_fam_Incertae_sedis	g__Fungi_gen_Incertae_sedis	s__Fungi_sp
OTU578	SINGLETON|n=1	0	0	1	MN071391	SH1043354.10FU	1.88419e-101	372.297	201	1	222	297	518	215	215	96.8	100	222	k__Fungi	p__Fungi_phy_Incertae_sedis	c__Fungi_cls_Incertae_sedis	o__Fungi_ord_Incertae_sedis	f__Fungi_fam_Incertae_sedis	g__Fungi_gen_Incertae_sedis	s__Fungi_sp
OTU579	SINGLETON|n=1	0	0	1	MN071391	SH1043354.10FU	4.10752e-093	344.597	186	1	222	297	518	210	210	94.6	100	222	k__Fungi	p__Fungi_phy_Incertae_sedis	c__Fungi_cls_Incertae_sedis	o__Fungi_ord_Incertae_sedis	f__Fungi_fam_Incertae_sedis	g__Fungi_gen_Incertae_sedis	s__Fungi_sp
OTU580	SINGLETON|n=1	0	0	1	MN071391	SH1043354.10FU	8.7663e-100	366.757	198	1	222	297	518	214	214	96.4	100	222	k__Fungi	p__Fungi_phy_Incertae_sedis	c__Fungi_cls_Incertae_sedis	o__Fungi_ord_Incertae_sedis	f__Fungi_fam_Incertae_sedis	g__Fungi_gen_Incertae_sedis	s__Fungi_sp
OTU581	SINGLETON|n=1	0	0	1	MN071391	SH1043354.10FU	1.96589e-071	272.578	147	1	222	297	518	197	197	88.7	100	222	k__Fungi	p__Fungi_phy_Incertae_sedis	c__Fungi_cls_Incertae_sedis	o__Fungi_ord_Incertae_sedis	f__Fungi_fam_Incertae_sedis	g__Fungi_gen_Incertae_sedis	s__Fungi_sp
OTU582	SINGLETON|n=1	0	0	1	AM901832	SH0934681.10FU	1.94623e-096	355.677	192	1	227	539	762	216	216	95.2	100	227	k__Fungi	p__Basidiomycota	c__Exobasidiomycetes	o__Exobasidiales	f__Exobasidiaceae	g__Exobasidium	s__Exobasidium_sp
OTU583	SINGLETON|n=1	0	0	1	MH188916	SH0926074.10FU	3.35546e-104	381.53	206	1	232	347	580	226	226	97.4	98.3	236	k__Fungi	p__Basidiomycota	c__Exobasidiomycetes	o__Exobasidiales	f__Exobasidiales_fam_Incertae_sedis	g__Guomyces	s__Guomyces_nicotianae
OTU584	SINGLETON|n=1	0	0	1	MW710094	SH0733979.10FU	5.5753e-107	390.763	211	1	236	324	558	228	228	96.6	100	236	k__Fungi	p__Basidiomycota	c__Microbotryomycetes	o__Microbotryomycetes_ord_Incertae_sedis	f__Colacogloeaceae	g__Colacogloea	s__Colacogloea_philyla
OTU585	SINGLETON|n=1	0	0	1
OTU586	SINGLETON|n=1	0	0	1	DQ870625	SH0880564.10FU	4.68106e-053	211.638	114	1	237	356	593	204	204	86.1	100	237	k__Fungi	p__Basidiomycota	c__Microbotryomycetes	o__Microbotryomycetes_ord_Incertae_sedis	f__Colacogloeaceae	g__Colacogloea	s__Colacogloea_subericola
OTU587	SINGLETON|n=1	0	0	1	MH188916	SH0926074.10FU	5.87271e-077	291.044	157	1	238	347	584	212	212	89.1	100	238	k__Fungi	p__Basidiomycota	c__Exobasidiomycetes	o__Exobasidiales	f__Exobasidiales_fam_Incertae_sedis	g__Guomyces	s__Guomyces_nicotianae
OTU588	SINGLETON|n=1	0	0	1
OTU589	SINGLETON|n=1	0	0	1	MH188916	SH0926074.10FU	2.61876e-105	385.223	208	1	238	347	585	230	230	96.6	100	238	k__Fungi	p__Basidiomycota	c__Exobasidiomycetes	o__Exobasidiales	f__Exobasidiales_fam_Incertae_sedis	g__Guomyces	s__Guomyces_nicotianae
OTU590	SINGLETON|n=1	0	0	1	GU062215	SH0926075.10FU	4.6905e-078	294.738	159	1	219	409	627	201	201	91.8	89.4	245	k__Fungi	p__Basidiomycota	c__Basidiomycota_cls_Incertae_sedis	o__Basidiomycota_ord_Incertae_sedis	f__Basidiomycota_fam_Incertae_sedis	g__Basidiomycota_gen_Incertae_sedis	s__Basidiomycota_sp
OTU591	SINGLETON|n=1	0	0	1	GU062229	SH0926075.10FU	1.30413e-078	296.584	160	1	235	308	548	218	218	92.8	95.9	245	k__Fungi	p__Basidiomycota	c__Basidiomycota_cls_Incertae_sedis	o__Basidiomycota_ord_Incertae_sedis	f__Basidiomycota_fam_Incertae_sedis	g__Basidiomycota_gen_Incertae_sedis	s__Basidiomycota_sp
OTU592	SINGLETON|n=1	0	0	1	GU062229	SH0926075.10FU	4.63573e-118	427.696	231	1	251	308	561	247	247	98.4	98.4	255	k__Fungi	p__Basidiomycota	c__Basidiomycota_cls_Incertae_sedis	o__Basidiomycota_ord_Incertae_sedis	f__Basidiomycota_fam_Incertae_sedis	g__Basidiomycota_gen_Incertae_sedis	s__Basidiomycota_sp
OTU593	SINGLETON|n=1	0	0	1	GU062229	SH0926075.10FU	1.00346e-114	416.616	225	1	251	308	561	245	245	97.6	98.4	255	k__Fungi	p__Basidiomycota	c__Basidiomycota_cls_Incertae_sedis	o__Basidiomycota_ord_Incertae_sedis	f__Basidiomycota_fam_Incertae_sedis	g__Basidiomycota_gen_Incertae_sedis	s__Basidiomycota_sp
OTU594	SINGLETON|n=1	0	0	1	GU062229	SH0926075.10FU	1.31301e-108	396.303	214	1	252	308	561	241	241	95.6	98.4	256	k__Fungi	p__Basidiomycota	c__Basidiomycota_cls_Incertae_sedis	o__Basidiomycota_ord_Incertae_sedis	f__Basidiomycota_fam_Incertae_sedis	g__Basidiomycota_gen_Incertae_sedis	s__Basidiomycota_sp
OTU595	SINGLETON|n=1	0	0	1	GU062229	SH0926075.10FU	6.09224e-112	407.383	220	1	253	308	561	244	244	96.4	98.4	257	k__Fungi	p__Basidiomycota	c__Basidiomycota_cls_Incertae_sedis	o__Basidiomycota_ord_Incertae_sedis	f__Basidiomycota_fam_Incertae_sedis	g__Basidiomycota_gen_Incertae_sedis	s__Basidiomycota_sp
OTU596	SINGLETON|n=1	0	0	1	GU062229	SH0926075.10FU	6.22292e-097	357.524	193	1	253	308	561	235	235	92.9	98.4	257	k__Fungi	p__Basidiomycota	c__Basidiomycota_cls_Incertae_sedis	o__Basidiomycota_ord_Incertae_sedis	f__Basidiomycota_fam_Incertae_sedis	g__Basidiomycota_gen_Incertae_sedis	s__Basidiomycota_sp
OTU597	SINGLETON|n=1	0	0	1	GU062229	SH0926075.10FU	7.91508e-111	403.69	218	1	254	308	561	242	242	95.3	98.4	258	k__Fungi	p__Basidiomycota	c__Basidiomycota_cls_Incertae_sedis	o__Basidiomycota_ord_Incertae_sedis	f__Basidiomycota_fam_Incertae_sedis	g__Basidiomycota_gen_Incertae_sedis	s__Basidiomycota_sp
OTU598	SINGLETON|n=1	0	0	1	GU062229	SH0926075.10FU	8.02786e-101	370.45	200	1	254	308	561	238	238	93.7	98.4	258	k__Fungi	p__Basidiomycota	c__Basidiomycota_cls_Incertae_sedis	o__Basidiomycota_ord_Incertae_sedis	f__Basidiomycota_fam_Incertae_sedis	g__Basidiomycota_gen_Incertae_sedis	s__Basidiomycota_sp
OTU599	SINGLETON|n=1	0	0	1	GU062229	SH0926075.10FU	1.68924e-117	425.85	230	1	254	308	561	246	246	96.9	98.4	258	k__Fungi	p__Basidiomycota	c__Basidiomycota_cls_Incertae_sedis	o__Basidiomycota_ord_Incertae_sedis	f__Basidiomycota_fam_Incertae_sedis	g__Basidiomycota_gen_Incertae_sedis	s__Basidiomycota_sp
OTU600	SINGLETON|n=1	0	0	1	GU062229	SH0926075.10FU	3.65657e-114	414.77	224	1	254	308	561	244	244	96.1	98.4	258	k__Fungi	p__Basidiomycota	c__Basidiomycota_cls_Incertae_sedis	o__Basidiomycota_ord_Incertae_sedis	f__Basidiomycota_fam_Incertae_sedis	g__Basidiomycota_gen_Incertae_sedis	s__Basidiomycota_sp
OTU601	SINGLETON|n=1	0	0	1	GU062229	SH0926075.10FU	3.68253e-109	398.15	215	1	254	308	561	241	241	94.9	98.4	258	k__Fungi	p__Basidiomycota	c__Basidiomycota_cls_Incertae_sedis	o__Basidiomycota_ord_Incertae_sedis	f__Basidiomycota_fam_Incertae_sedis	g__Basidiomycota_gen_Incertae_sedis	s__Basidiomycota_sp
OTU602	SINGLETON|n=1	0	0	1	GU062229	SH0926075.10FU	1.68924e-117	425.85	230	1	254	308	561	246	246	96.9	98.4	258	k__Fungi	p__Basidiomycota	c__Basidiomycota_cls_Incertae_sedis	o__Basidiomycota_ord_Incertae_sedis	f__Basidiomycota_fam_Incertae_sedis	g__Basidiomycota_gen_Incertae_sedis	s__Basidiomycota_sp
OTU603	SINGLETON|n=1	0	0	1	GU062229	SH0926075.10FU	1.68924e-117	425.85	230	1	254	308	561	246	246	96.9	98.4	258	k__Fungi	p__Basidiomycota	c__Basidiomycota_cls_Incertae_sedis	o__Basidiomycota_ord_Incertae_sedis	f__Basidiomycota_fam_Incertae_sedis	g__Basidiomycota_gen_Incertae_sedis	s__Basidiomycota_sp
OTU604	SINGLETON|n=1	0	0	1	GU062229	SH0926075.10FU	3.64651e-119	431.39	233	1	255	308	561	248	248	97.3	98.5	259	k__Fungi	p__Basidiomycota	c__Basidiomycota_cls_Incertae_sedis	o__Basidiomycota_ord_Incertae_sedis	f__Basidiomycota_fam_Incertae_sedis	g__Basidiomycota_gen_Incertae_sedis	s__Basidiomycota_sp
OTU605	SINGLETON|n=1	0	0	1	GU062229	SH0926075.10FU	7.94934e-111	403.69	218	1	255	308	561	243	243	95.3	98.5	259	k__Fungi	p__Basidiomycota	c__Basidiomycota_cls_Incertae_sedis	o__Basidiomycota_ord_Incertae_sedis	f__Basidiomycota_fam_Incertae_sedis	g__Basidiomycota_gen_Incertae_sedis	s__Basidiomycota_sp
OTU606	SINGLETON|n=1	0	0	1	GU062229	SH0926075.10FU	3.64651e-119	431.39	233	1	255	308	561	248	248	97.3	98.5	259	k__Fungi	p__Basidiomycota	c__Basidiomycota_cls_Incertae_sedis	o__Basidiomycota_ord_Incertae_sedis	f__Basidiomycota_fam_Incertae_sedis	g__Basidiomycota_gen_Incertae_sedis	s__Basidiomycota_sp
OTU607	SINGLETON|n=1	0	0	1	GU062229	SH0926075.10FU	7.8933e-116	420.31	227	1	255	308	561	246	246	96.5	98.5	259	k__Fungi	p__Basidiomycota	c__Basidiomycota_cls_Incertae_sedis	o__Basidiomycota_ord_Incertae_sedis	f__Basidiomycota_fam_Incertae_sedis	g__Basidiomycota_gen_Incertae_sedis	s__Basidiomycota_sp
OTU608	SINGLETON|n=1	0	0	1	GU062229	SH0926075.10FU	7.94934e-111	403.69	218	1	255	308	561	243	243	95.3	98.5	259	k__Fungi	p__Basidiomycota	c__Basidiomycota_cls_Incertae_sedis	o__Basidiomycota_ord_Incertae_sedis	f__Basidiomycota_fam_Incertae_sedis	g__Basidiomycota_gen_Incertae_sedis	s__Basidiomycota_sp
OTU609	SINGLETON|n=1	0	0	1	GU062229	SH0926075.10FU	7.94934e-111	403.69	218	1	255	308	561	243	243	95.3	98.5	259	k__Fungi	p__Basidiomycota	c__Basidiomycota_cls_Incertae_sedis	o__Basidiomycota_ord_Incertae_sedis	f__Basidiomycota_fam_Incertae_sedis	g__Basidiomycota_gen_Incertae_sedis	s__Basidiomycota_sp
OTU610	SINGLETON|n=1	0	0	1	GU062229	SH0926075.10FU	1.69655e-117	425.85	230	1	255	308	561	247	247	96.9	98.5	259	k__Fungi	p__Basidiomycota	c__Basidiomycota_cls_Incertae_sedis	o__Basidiomycota_ord_Incertae_sedis	f__Basidiomycota_fam_Incertae_sedis	g__Basidiomycota_gen_Incertae_sedis	s__Basidiomycota_sp
OTU611	SINGLETON|n=1	0	0	1	GU062229	SH0926075.10FU	1.69655e-117	425.85	230	1	255	308	561	247	247	96.9	98.5	259	k__Fungi	p__Basidiomycota	c__Basidiomycota_cls_Incertae_sedis	o__Basidiomycota_ord_Incertae_sedis	f__Basidiomycota_fam_Incertae_sedis	g__Basidiomycota_gen_Incertae_sedis	s__Basidiomycota_sp
OTU612	SINGLETON|n=1	0	0	1	GU062229	SH0926075.10FU	7.8933e-116	420.31	227	1	255	308	561	246	246	96.5	98.5	259	k__Fungi	p__Basidiomycota	c__Basidiomycota_cls_Incertae_sedis	o__Basidiomycota_ord_Incertae_sedis	f__Basidiomycota_fam_Incertae_sedis	g__Basidiomycota_gen_Incertae_sedis	s__Basidiomycota_sp
OTU613	SINGLETON|n=1	0	0	1	GU062229	SH0926075.10FU	3.64651e-119	431.39	233	1	255	308	561	248	248	97.3	98.5	259	k__Fungi	p__Basidiomycota	c__Basidiomycota_cls_Incertae_sedis	o__Basidiomycota_ord_Incertae_sedis	f__Basidiomycota_fam_Incertae_sedis	g__Basidiomycota_gen_Incertae_sedis	s__Basidiomycota_sp
OTU614	SINGLETON|n=1	0	0	1	GU062229	SH0926075.10FU	3.64651e-119	431.39	233	1	255	308	561	248	248	97.3	98.5	259	k__Fungi	p__Basidiomycota	c__Basidiomycota_cls_Incertae_sedis	o__Basidiomycota_ord_Incertae_sedis	f__Basidiomycota_fam_Incertae_sedis	g__Basidiomycota_gen_Incertae_sedis	s__Basidiomycota_sp
OTU615	SINGLETON|n=1	0	0	1	GU062229	SH0926075.10FU	1.73295e-102	375.99	203	1	255	308	561	238	238	93.3	98.5	259	k__Fungi	p__Basidiomycota	c__Basidiomycota_cls_Incertae_sedis	o__Basidiomycota_ord_Incertae_sedis	f__Basidiomycota_fam_Incertae_sedis	g__Basidiomycota_gen_Incertae_sedis	s__Basidiomycota_sp
OTU616	SINGLETON|n=1	0	0	1	GU062229	SH0926075.10FU	1.69655e-117	425.85	230	1	255	308	561	247	247	96.9	98.5	259	k__Fungi	p__Basidiomycota	c__Basidiomycota_cls_Incertae_sedis	o__Basidiomycota_ord_Incertae_sedis	f__Basidiomycota_fam_Incertae_sedis	g__Basidiomycota_gen_Incertae_sedis	s__Basidiomycota_sp
OTU617	SINGLETON|n=1	0	0	1	GU062229	SH0926075.10FU	7.94934e-111	403.69	218	1	255	308	561	243	243	95.3	98.5	259	k__Fungi	p__Basidiomycota	c__Basidiomycota_cls_Incertae_sedis	o__Basidiomycota_ord_Incertae_sedis	f__Basidiomycota_fam_Incertae_sedis	g__Basidiomycota_gen_Incertae_sedis	s__Basidiomycota_sp
OTU618	SINGLETON|n=1	0	0	1	GU062229	SH0926075.10FU	1.04746e-099	366.757	198	1	256	308	561	237	237	92.6	98.5	260	k__Fungi	p__Basidiomycota	c__Basidiomycota_cls_Incertae_sedis	o__Basidiomycota_ord_Incertae_sedis	f__Basidiomycota_fam_Incertae_sedis	g__Basidiomycota_gen_Incertae_sedis	s__Basidiomycota_sp
OTU619	SINGLETON|n=1	0	0	1	GU062229	SH0926075.10FU	4.73739e-118	427.696	231	1	256	308	561	248	248	96.9	98.5	260	k__Fungi	p__Basidiomycota	c__Basidiomycota_cls_Incertae_sedis	o__Basidiomycota_ord_Incertae_sedis	f__Basidiomycota_fam_Incertae_sedis	g__Basidiomycota_gen_Incertae_sedis	s__Basidiomycota_sp
OTU620	SINGLETON|n=1	0	0	1
	Total	39199	28428	51400
